# Supplementary material for: Egg white protein hydrolysate decreased blood pressure via the competing endogenous RNA regulatory networks in female spontaneously hypertensive rats
Source: Royal Society of Chemistry journal article supplement (doi:10.1039/d3fo02797j), 2023-01-01
Supplement: d3fo02797j1.xlsx [file d3fo02797j1.xlsx]

## Sheet: mRNA counts
gene_id	C-1	C-2	C-3	C-4	C-5	C-6	H-1	H-2	H-3	H-4	H-5	H-6
A1bg	1	4	19	7	0	32	6	0	11	6	14	17
A1cf	5	0	2	1	2	19	0	2	1	3	2	6
A2m	1	1	4	0	0	0	0	1	1	5	8	2
A2ml1	0	0	0	0	0	0	0	0	2	0	0	0
A3galt2	2112	3750	2334	4803	3295	5508	4631	4267	4392	5193	5839	5483
A4galt	6	92	47	39	75	39	55	50	380	458	321	95
A4gnt	0	1	0	0	0	0	0	0	1	0	0	0
Aaas	492	335	334	294	463	488	596	485	501	508	504	617
Aacs	5753	2281	6133	1271	8519	2012	5089	4959	7039	6914	2137	5343
Aadac	0	0	0	0	0	1	0	0	0	0	0	2
Aadacl2	2	0	0	0	0	0	0	0	0	0	0	0
Aadacl3	0	0	0	0	0	0	0	0	0	0	0	0
Aadacl4	0	0	0	0	0	4	0	0	0	0	0	0
Aadat	148	147	438	55	334	93	295	490	511	354	86	290
Aaed1	3617	1760	2548	3147	3381	3451	3478	3119	2789	3408	3022	3395
Aagab	1639	1304	1341	1423	1352	1694	1558	1614	1673	1779	1728	1614
Aak1	6034	5371	5427	5598	5846	6919	6574	6321	7660	8519	7391	6805
Aamdc	371	105	197	104	203	145	184	220	185	133	129	142
Aamp	3389	2012	2621	2659	3003	2832	3173	3343	3163	3340	3003	3145
Aanat	8	44	20	18	24	29	33	25	19	49	51	22
Aar2	2456	1096	1569	1528	1704	1827	1799	1799	1647	1775	1689	1911
Aard	1	0	1	6	1	0	8	3	1	1	7	20
Aars	6899	3077	4910	4408	5845	4771	5322	5141	5426	5787	4990	5036
Aars2	1901	534	1115	530	1119	579	799	984	764	832	647	795
Aarsd1	1280	663	962	915	994	1032	1157	1233	1069	972	1060	1030
Aasdh	714	797	842	683	754	906	872	1016	1091	1032	947	1085
Aasdhppt	1671	724	1176	956	1074	1149	1274	1381	1231	1558	1165	1125
Aass	729	535	569	1159	646	1019	945	800	715	879	1243	1117
Aatf	312	236	329	272	315	352	348	392	389	398	323	383
Aatk	755	4128	1589	1158	1028	1830	2771	1319	7607	6754	5892	4576
Abat	74	246	139	82	42	53	246	95	838	845	693	387
Abca1	8571	7597	10404	6895	9527	8078	7417	10314	14233	16371	8858	11097
Abca12	0	0	0	0	0	1	0	0	3	1	2	0
Abca13	0	1	1	2	1	3	6	1	0	7	1	0
Abca14	0	0	0	1	1	1	0	0	0	1	0	4
Abca15	0	0	0	0	0	0	0	0	0	0	0	0
Abca16	50	12	48	20	29	30	32	23	41	46	18	29
Abca17	32	8	20	5	21	15	8	25	40	39	34	12
Abca2	14400	8086	10207	8719	9916	10202	10144	10707	11847	12203	10779	11032
Abca3	3965	3590	3618	3589	3914	4571	4145	4372	6465	6704	5166	4793
Abca4	103	24	59	42	37	67	54	74	74	84	43	51
Abca5	1613	848	1024	1178	1273	1194	1111	1102	1391	1494	1445	1249
Abca6	7	28	15	12	6	48	24	12	69	65	20	43
Abca7	885	1298	724	595	683	852	726	788	1675	1999	1272	824
Abca8	919	1659	1066	1395	931	1494	1455	1205	2592	2769	1880	2377
Abca8a	14499	21987	18686	13410	12814	18465	23207	15176	64848	53923	33086	38515
Abca9	2434	1978	2295	3270	2628	4391	3121	2709	4370	4375	3126	4464
Abcb10	1491	1007	1150	1274	1249	1372	1466	1319	1206	1277	1372	1453
Abcb11	2945	25	445	15	403	35	117	163	113	43	10	76
Abcb1a	41	58	51	15	31	43	69	25	437	358	204	191
Abcb1b	73	363	222	337	224	388	194	191	240	191	235	243
Abcb4	240	183	141	108	168	262	153	100	212	228	209	207
Abcb5	0	0	0	0	0	0	0	0	0	0	0	0
Abcb6	2332	1468	1524	1167	1636	1373	1651	1667	1866	1886	1824	1677
Abcb7	2252	585	1052	839	1021	952	937	1156	946	995	940	972
Abcb8	4218	1288	2616	1208	2436	1550	2127	2300	1761	1976	1732	1806
Abcb9	1184	194	523	160	558	258	298	318	370	282	292	250
Abcc1	3199	5001	3441	5480	4442	5714	5253	4750	4904	5767	5359	6043
Abcc10	1623	571	1261	480	1020	724	968	1201	1045	1164	728	968
Abcc12	0	0	0	0	2	1	1	1	2	2	4	1
Abcc2	15	5	13	5	8	81	11	2	56	5	18	10
Abcc3	1514	1946	1718	1396	1702	1945	1647	1695	1814	1958	1770	2023
Abcc4	3644	945	2187	418	2184	1010	961	1438	1156	1311	880	934
Abcc5	3013	5013	3523	4069	3571	4504	3909	4144	5905	6096	5453	5431
Abcc6	1	9	12	4	2	97	14	12	55	51	31	20
Abcc8	1360	537	1440	751	1216	739	1219	1105	876	873	860	1054
Abcc9	13722	16250	15030	28161	18970	27883	21892	23462	19188	22062	23284	26656
Abcd1	2154	1690	1821	2156	2086	2604	2344	2286	2313	2259	2144	2453
Abcd2	3241	1154	4096	539	2831	1456	2713	3928	4683	4495	1249	1983
Abcd3	12248	3108	5431	3933	5094	4126	4647	5681	4721	5234	4154	4651
Abcd4	1558	499	1340	393	1527	532	813	1035	1050	1333	485	926
Abce1	6242	3661	5065	6101	6558	6170	6694	6961	6615	7690	6277	6198
Abcf1	2963	1422	2041	1937	2532	2255	2320	2408	2276	2322	2466	2301
Abcf2	2105	1406	1653	1882	2040	2022	2177	2196	2193	2357	2255	2260
Abcf3	3568	1770	2396	1874	2600	2090	2374	2482	2339	2528	2212	2398
Abcg1	2707	1508	3041	921	2423	2001	1969	3378	2716	3585	1659	1840
Abcg2	65	135	112	147	58	84	173	132	472	423	335	294
Abcg3	282	349	276	293	274	366	277	342	295	401	247	299
Abcg3l1	481	589	576	494	534	757	574	603	624	774	593	664
Abcg3l3	819	1295	1088	1082	944	1516	1288	1097	1443	1698	1348	1421
Abcg3l4	138	97	160	132	117	148	128	133	158	215	133	134
Abcg4	1565	5328	2787	6923	6000	6686	5961	5091	4523	4923	7760	7194
Abcg5	3	0	6	0	0	2	0	1	9	11	8	1
Abcg8	7	9	6	5	8	11	11	19	21	10	8	6
Abhd1	3232	578	1380	496	1053	681	806	1234	813	682	611	848
Abhd10	131	72	7	12	12	65	30	12	18	15	71	62
Abhd11	651	228	363	279	458	298	452	484	387	424	354	399
Abhd12	3802	1567	2285	2090	2372	2556	2575	2969	3139	3558	2313	2530
Abhd12b	0	0	4	0	0	1	5	1	1	2	2	2
Abhd13	2714	1666	2426	2630	2603	2947	2957	2680	2564	2999	2479	2825
Abhd14a	467	330	504	321	382	361	529	485	599	622	522	435
Abhd14b	2703	1304	2072	1984	2247	2075	2504	2614	2268	2401	2206	2319
Abhd15	2534	827	2689	401	2041	1135	1558	2929	2630	2572	749	1171
Abhd16a	2490	1237	1985	1238	1741	1724	1766	2007	1787	1918	1507	1669
Abhd16b	12	20	15	2	5	7	5	2	9	9	4	8
Abhd17a	4446	2213	3139	2772	3421	3139	3128	3456	2958	3260	3215	3288
Abhd17b	1527	882	956	945	995	1097	971	1086	1248	1297	1184	990
Abhd17c	1647	403	782	428	606	500	590	703	560	624	448	580
Abhd18	596	488	538	357	388	468	366	534	514	541	478	465
Abhd2	1312	2339	1624	2186	2052	2801	2284	2013	2648	3035	2699	2774
Abhd3	221	110	189	132	153	122	153	195	344	390	207	165
Abhd4	8847	2955	5137	3544	4962	4378	4871	5310	4615	4989	4293	4413
Abhd5	6406	1733	4734	2502	4578	3610	4088	5179	3978	4606	2821	3553
Abhd6	1356	744	1037	767	1117	1092	958	1007	1069	1011	896	950
Abhd8	477	696	605	831	731	1184	911	804	892	1113	1075	1081
Abi1	3739	4362	3464	4669	4349	5604	4762	4518	4647	5586	4837	4977
Abi2	2855	3116	2993	3965	3452	4581	3830	3729	4112	4770	4361	4227
Abi3	390	424	258	150	281	426	223	338	293	367	298	233
Abi3bp	3434	4996	6099	9083	5100	9501	7219	7956	8845	10734	7269	8020
Abl1	835	636	742	731	784	943	811	878	758	785	815	912
Abl2	3100	2959	3183	3135	3678	3925	3212	3542	3377	3886	3588	3678
Ablim1	28396	6323	13968	6040	11783	9654	9140	13563	13053	14945	7250	9634
Ablim2	100	162	95	29	86	43	76	100	659	782	382	84
Ablim3	4186	1024	2773	563	2231	805	1463	2182	2473	2321	1054	1341
Abo	146	110	120	99	119	129	158	145	189	185	133	137
Abo2	0	0	1	0	2	1	1	0	0	1	0	0
Abr	3798	6276	5069	7524	5990	8766	8655	7016	7848	7949	12348	9750
Abra	221	513	356	3548	1734	652	314	239	326	735	634	1476
Abracl	629	562	455	897	855	1144	794	889	729	910	757	859
Abt1	453	218	356	473	390	410	516	414	463	446	463	528
Abtb1	934	1876	816	645	621	961	836	858	899	887	886	933
Abtb2	989	1897	1368	2681	1895	2338	2335	2018	1633	1821	2459	2939
Ac1576	160	219	177	197	202	246	207	215	253	210	249	252
Acaa1	2796	945	1940	765	1757	1051	1581	2252	1674	1886	1133	1425
Acaa1b	506	0	91	2	102	5	25	65	4	2	5	12
Acaa2	77245	1685	27781	2235	23168	4212	10465	21929	6134	5733	2799	6354
Acaca	190076	17506	143411	12148	96852	11093	80733	92120	104435	91058	23239	58124
Acacb	70683	4124	38739	2478	31745	5397	20431	36795	10673	22572	3372	19919
Acad10	13355	1191	7147	924	5016	1234	3135	5080	3081	3149	1480	2369
Acad11	6894	657	3483	948	2094	1266	1635	2351	2243	2473	935	1362
Acad8	994	799	945	786	925	991	1089	1219	1076	1089	976	941
Acad9	2297	809	1587	915	1433	1122	1325	1546	1266	1352	1134	1202
Acadl	88328	3501	31566	5710	27099	6380	13618	22739	7101	7268	5152	9867
Acadm	67762	2616	22080	5122	19561	5610	11656	18289	5766	5407	4924	8146
Acads	13057	603	5013	557	3862	968	2599	3836	1783	1474	785	1749
Acadsb	3980	1386	2944	2149	2665	1720	2758	3395	3303	3330	2032	2648
Acadvl	51028	3381	22066	4258	19127	6000	10350	17141	7381	6711	4869	7470
Acan	38	82	14	61	35	68	28	42	13	21	38	55
Acap1	209	258	100	81	86	178	58	123	293	143	148	92
Acap2	8225	6173	7314	7464	7589	8976	7719	8067	6924	8975	7619	9117
Acap3	905	1660	1258	1441	1336	1786	1406	1472	1743	1865	1611	1927
Acat1	38443	2263	13889	3528	10958	3399	6983	11487	6691	6223	3873	5432
Acat2	1405	361	914	282	1209	252	730	755	1185	1182	610	848
Acat2l1	290	241	238	298	298	219	295	256	398	311	266	337
Acbd3	3166	2264	2533	3288	2875	3203	3068	3084	2802	3266	3383	3622
Acbd4	1442	2183	1915	1935	1966	2286	2297	2392	2255	2373	2244	2463
Acbd5	2385	1042	1812	1292	1504	1581	1565	1771	1950	2003	1608	1592
Acbd6	762	667	770	585	695	882	635	811	863	877	705	828
Acbd7	1	0	2	6	5	0	5	1	7	10	2	2
Accs	500	410	424	306	434	425	455	429	379	382	333	514
Accsl	10	59	30	55	51	65	25	35	12	29	46	44
Acd	977	827	762	777	816	872	903	917	925	938	1013	920
Ace	5383	2059	2810	2690	4492	5323	4379	3149	3476	3908	3882	4504
Ace2	928	20	455	7	232	13	121	178	116	85	35	43
Ace3	0	1	0	0	2	2	1	1	2	0	0	1
Acer1	13	1	6	4	8	1	0	0	6	4	10	2
Acer2	1082	1304	976	816	824	1331	1182	1292	1947	1724	1262	1385
Acer3	3688	1368	2498	1627	2536	2233	2430	2454	2502	2882	2120	2304
Ache	181	860	168	373	188	364	315	364	2285	3194	1576	336
Acin1	5383	6662	5746	7259	7094	7050	8007	7961	7674	8315	8138	8865
Ackr1	319	663	448	478	371	917	610	668	1085	1122	1110	528
Ackr2	328	210	420	369	347	586	405	621	655	857	488	765
Ackr3	5528	1281	2808	3694	4485	5123	3404	4525	3407	5890	2858	3858
Ackr4	1508	248	787	1372	1930	1997	2432	1479	2156	1380	668	1208
Acly	214645	15221	149677	10580	137942	8019	112364	106722	153803	133587	26539	93709
Acmsd	0	1	5	2	5	0	4	11	3	6	16	6
Acnat1	0	0	0	0	0	0	0	0	0	0	0	0
Acnat2	0	0	0	0	0	4	0	0	0	0	0	0
Aco1	31192	4651	21815	4663	18682	4949	14784	18637	17879	18275	6557	12346
Aco2	202040	8473	83473	10978	73968	13898	38647	61806	23546	20486	13550	25068
Acot1	51	6	10	2	5	13	20	6	34	19	24	12
Acot11	18585	1057	4923	1377	4329	1385	2240	3498	1313	1015	1195	1655
Acot12	1	0	1	2	0	6	0	0	1	0	3	1
Acot13	1750	80	570	129	579	170	303	519	280	244	151	222
Acot2	13829	463	3392	769	2855	961	1666	2855	1275	1128	979	1202
Acot3	1538	522	640	535	730	752	628	715	521	639	652	683
Acot4	320	5	68	5	62	9	34	36	9	13	11	14
Acot5	0	0	9	0	0	1	0	1	19	6	0	0
Acot6	2	0	0	0	1	2	0	0	0	5	1	0
Acot7	1234	829	753	607	870	828	806	952	2334	2920	1634	791
Acot8	1102	169	436	137	351	257	358	404	274	321	235	270
Acot9	2938	1519	1787	2174	2552	2541	2404	2613	2364	3129	2534	2648
Acox1	24533	3666	13441	3910	13933	5421	9165	13287	9295	10835	5275	8397
Acox2	62	106	100	60	79	124	64	86	147	78	98	124
Acox3	6107	1818	3080	2114	3255	2814	2617	3268	2794	3130	2443	2839
Acoxl	0	9	14	28	12	12	15	25	15	26	11	25
Acp1	861	361	644	437	702	557	731	801	701	758	661	731
Acp2	1588	1160	1247	1253	1485	1489	1530	1313	1457	1616	1503	1558
Acp5	1716	154	725	287	824	351	565	533	549	582	332	590
Acp6	620	373	627	285	585	540	621	580	492	653	460	640
Acp7	0	0	0	0	0	0	0	0	0	1	0	0
Acpp	14	77	2	6	7	9	4	15	291	367	176	10
Acpt	31	116	48	96	70	79	66	94	73	79	117	60
Acr	22	11	10	8	15	12	26	32	8	13	7	9
Acrbp	143	209	187	141	194	167	195	181	225	233	250	278
Acrv1	3	0	0	0	0	0	0	0	0	0	6	0
Acsbg1	20	185	11	3	3	15	43	32	707	764	504	58
Acsbg2	1	7	5	1	4	0	6	2	8	6	8	2
Acsf2	34522	1515	11423	1807	7534	1822	6044	8361	3912	2821	1966	3894
Acsf3	2921	492	1486	540	1365	757	1125	1387	1213	1110	753	971
Acsl1	158252	21646	105740	12335	92596	27130	50597	93857	67213	63099	17633	39033
Acsl3	1299	926	1006	1319	1558	1310	1567	1359	1797	2043	1579	1612
Acsl4	7666	2589	4731	2533	4125	2973	3451	4129	4938	6444	3272	3201
Acsl5	57846	1761	20226	1952	16627	3073	7705	12929	3470	2859	2359	3811
Acsl6	104	90	58	90	42	95	94	95	344	434	254	129
Acsm1	5	30	18	14	20	26	41	28	151	87	51	56
Acsm2a	0	5	0	3	0	1	0	2	0	1	1	0
Acsm3	104	168	152	82	82	111	113	109	124	152	82	130
Acsm4	36	24	55	25	44	43	41	22	41	43	31	24
Acsm5	1547	245	1885	86	1024	216	747	2022	820	1416	394	460
Acss1	10678	2722	5449	3618	4310	2565	3298	3802	3415	2695	3387	3901
Acss2	22101	3770	16921	3915	15017	3625	13785	14440	13966	16209	5676	12037
Acss3	9111	806	3614	529	2198	935	2542	3581	2674	2403	953	1496
Acta1	742	907	968	1857	1758	1409	934	1198	3139	1488	1307	1450
Acta2	200082	232149	192913	482632	404775	445002	397104	358018	300386	334897	399604	443280
Actb	136645	160991	111640	247931	220893	242521	219022	189471	176277	214590	227761	244821
Actbl2	3	4	8	1	3	2	1	3	2	3	2	9
Actc1	6	1	11	7	10	17	6	0	3	6	13	4
Actg1	25935	34678	23087	44423	33493	41148	31788	29575	28726	37459	35800	38807
Actg2	5977	19765	11535	30601	34108	37999	20823	20774	16246	27537	23019	26926
Actl10	48	143	76	95	90	91	95	117	95	78	77	146
Actl11	0	1	0	1	4	0	1	0	0	1	0	0
Actl6a	1324	656	935	802	1083	852	1006	986	1006	1098	897	972
Actl6b	0	28	0	4	2	0	1	7	94	127	34	4
Actl7a	25	96	47	29	47	57	45	82	48	58	34	56
Actl7b	6	3	16	14	17	9	9	5	3	15	19	22
Actl9	0	0	1	0	0	0	0	0	0	1	1	0
Actl9b	0	0	0	0	0	0	0	0	0	0	0	0
Actn1	17988	39925	23077	52197	42748	50083	44752	39910	35823	37900	48555	52577
Actn2	1171	87	109	52	193	130	61	76	59	48	45	70
Actn3	40	28	41	21	16	39	90	57	679	73	46	38
Actn4	35349	63372	42639	88390	78410	83002	78818	70144	59150	64993	80922	91426
Actr10	3143	1328	1998	2240	2252	1986	2239	2424	2284	2479	2160	2299
Actr1a	6716	4571	5274	6400	6216	7210	7673	7220	8369	9294	8695	7795
Actr1b	5785	2965	3944	5418	5544	5322	6229	5866	6280	6778	6406	5877
Actr2	14396	10374	10820	13316	13700	15789	12923	13259	12863	15787	14461	13802
Actr3	7951	6714	6801	9833	9236	10172	8126	8108	7642	9485	8238	9425
Actr3b	203	241	141	234	215	241	259	181	154	225	239	307
Actr5	335	725	434	646	582	584	589	646	534	570	717	736
Actr6	796	440	522	677	669	667	753	647	786	909	705	710
Actr8	1974	1421	1711	1687	1635	1855	2108	1964	1935	2085	2072	2178
Actrt1	0	0	0	0	0	0	0	0	0	0	0	0
Actrt2	0	0	0	0	0	0	0	0	0	0	0	0
Actrt3	5	4	6	4	8	19	7	3	8	13	5	6
Acvr1	2657	2917	3056	4355	3595	4498	3781	3990	3635	3900	4246	4380
Acvr1b	861	1553	985	1464	1223	2013	1414	1417	1511	1589	1789	1701
Acvr1c	2436	1240	3667	482	1594	1474	1765	3771	2428	2983	807	1331
Acvr2a	4010	2976	4172	4378	3946	5267	4210	4550	4303	5367	4194	4516
Acvr2b	1139	1231	1535	1322	1256	1690	1199	1519	1539	1683	1344	1693
Acvrl1	5364	6836	5548	7877	7944	9678	8397	7963	6082	8237	8797	9470
Acy1	3225	934	3345	825	2922	1076	2335	3561	2788	3139	1194	2087
Acy3	1117	1206	912	1208	1091	1223	1431	1352	1073	1130	1248	1328
Acyp1	915	124	423	201	402	215	244	345	246	251	224	260
Acyp2	470	57	191	59	175	127	102	173	157	226	105	74
Ada	565	1020	605	832	799	1076	989	1002	1002	945	1211	1108
Adad1	0	0	2	0	1	4	0	0	1	1	1	1
Adad2	0	1	0	0	0	0	0	0	0	0	0	0
Adal	526	330	423	284	388	455	419	452	482	458	446	457
Adam10	4525	4912	3921	4043	4123	6123	4924	4680	6436	6467	5709	5657
Adam11	144	449	270	308	315	294	256	282	211	238	265	407
Adam12	402	227	464	93	239	504	313	757	382	441	213	263
Adam15	4338	3409	3772	4280	4325	6621	4810	4846	4377	4815	4885	5222
Adam17	4859	4022	4587	5670	5278	6752	5021	5203	4901	5497	5186	5745
Adam18	0	0	0	0	0	0	0	0	1	0	0	0
Adam19	2239	2521	2405	1650	2179	2867	1317	1937	3497	3936	2228	1912
Adam1a	216	401	306	348	332	416	364	355	344	419	349	453
Adam2	10	3	4	3	3	2	2	0	1	2	0	11
Adam22	350	712	380	686	366	502	566	530	1859	2271	1364	720
Adam23	1038	2421	1996	846	1109	1814	2119	1703	8300	8924	4287	3393
Adam24	0	0	0	0	0	0	0	0	0	0	1	0
Adam26a	0	0	0	0	0	0	0	0	0	0	0	0
Adam28	0	0	0	0	0	0	0	0	0	0	0	0
Adam30	1	3	7	0	1	2	1	3	3	19	3	2
Adam32	3	16	21	24	18	25	12	14	20	22	27	12
Adam33	2395	5822	3459	5099	3126	5142	4297	5251	4909	4477	4015	5150
Adam34	0	0	0	0	0	0	0	0	0	0	0	0
Adam34l	0	0	0	0	0	0	0	0	0	0	0	0
Adam3a	0	0	0	0	0	0	0	0	1	0	0	0
Adam4	99	292	212	145	113	256	143	173	136	174	140	181
Adam4l1	78	283	207	111	100	240	149	152	182	190	171	208
Adam5	2	0	0	0	1	0	0	2	0	0	0	0
Adam6	0	1	0	0	0	0	0	0	1	0	1	0
Adam7	0	0	0	0	0	0	0	0	1	0	0	0
Adam8	124	354	143	167	115	289	165	201	190	270	211	245
Adam9	5354	4155	4626	6902	5778	7921	6586	6185	5675	6604	6766	7359
Adamdec1	0	0	0	0	0	0	0	0	1	0	0	0
Adamts1	8291	19264	15650	66743	33193	24456	20350	15160	11024	23947	20359	36173
Adamts10	4663	8117	5660	7425	6159	7221	6824	7581	6116	7128	7084	8660
Adamts12	8347	2733	6893	2938	5536	4378	3417	5602	4902	5667	2638	3973
Adamts13	32	17	26	1	7	6	26	18	26	20	7	8
Adamts14	420	263	401	241	436	340	325	344	312	325	431	362
Adamts15	3181	8453	6907	10805	6598	10282	10713	8614	8100	7755	11457	11064
Adamts16	108	10	44	1	16	20	7	15	53	84	17	25
Adamts17	67	273	191	238	115	225	300	149	484	467	384	407
Adamts18	8	12	13	8	9	32	9	12	23	14	10	14
Adamts19	6	11	11	2	8	7	6	11	30	43	18	3
Adamts2	5157	4988	7211	14886	9343	14262	11170	11391	8730	11473	10858	13789
Adamts20	15	146	111	13	8	36	139	84	755	520	235	428
Adamts3	120	428	292	586	325	571	483	365	472	570	709	556
Adamts4	167	74	180	38	134	192	62	110	85	100	135	72
Adamts5	2579	1742	2949	2660	2951	4361	2490	3067	3805	4581	2410	3224
Adamts6	1378	4673	2368	3265	2367	4331	2541	2262	1952	2525	2555	3357
Adamts7	674	371	789	226	362	403	302	530	752	851	503	552
Adamts8	4611	10653	6429	18528	13474	14774	12878	12727	8512	12849	13291	17622
Adamts9	3440	3997	4409	7022	5823	6368	6233	6523	6814	5801	7353	7295
Adamtsl1	740	1581	2439	5006	2418	5117	3397	3559	3405	4132	4000	5678
Adamtsl2	115	218	119	317	236	392	272	145	184	199	430	534
Adamtsl3	3122	7292	4863	11948	6684	10230	8438	7334	8352	7031	8530	11017
Adamtsl4	5504	9779	7343	11792	7233	10637	9989	11855	8337	10083	11537	11975
Adamtsl5	961	3451	1406	2918	2178	2749	2950	2172	1975	2114	2824	3766
Adap1	159	251	128	74	114	135	90	157	531	595	258	140
Adap2	247	52	160	109	125	174	135	152	146	196	118	174
Adar	3083	4421	3142	4533	4618	5439	4960	4826	4823	5378	5000	5803
Adarb1	8740	16173	12345	27430	18543	24216	23122	22422	17945	19161	24003	28128
Adarb2	2	22	25	5	8	7	31	15	133	103	41	58
Adat1	310	241	267	199	252	299	301	327	408	358	381	299
Adat2	102	73	70	97	53	84	71	103	158	89	77	107
Adat3	79	138	80	137	160	153	107	115	129	134	172	165
Adck1	957	418	700	421	588	564	628	709	577	703	555	628
Adck2	1204	1063	1142	943	1289	1164	1210	1444	1243	1249	1136	1375
Adck3	38160	1997	20608	1299	15139	3955	10493	20284	5016	6852	2284	6832
Adck4	873	904	793	621	787	918	937	950	975	1013	904	994
Adck5	1101	667	758	502	702	672	676	827	790	713	692	748
Adcy1	191	1629	616	252	193	381	1213	551	4940	5406	3158	2197
Adcy10	305	181	312	153	231	231	188	269	362	231	210	202
Adcy2	94	159	127	107	164	169	111	135	666	840	379	135
Adcy3	5935	3376	3711	3689	3997	4717	3499	4001	3652	3833	3388	4235
Adcy4	1282	1551	1210	996	1765	2177	1416	1622	1491	1734	1453	1565
Adcy5	15075	33453	22124	46551	30180	42086	39730	35605	28293	29150	49871	47382
Adcy6	17469	10816	15249	13642	15610	13942	15694	17334	13406	13676	14727	15488
Adcy7	2437	2728	2008	3729	2557	4545	2209	2219	1669	2383	2389	3529
Adcy8	2	40	2	1	0	19	6	20	143	234	100	5
Adcy9	6982	3012	4110	3774	4195	3834	3301	4035	3414	3222	3467	4016
Adcyap1	0	5	2	0	1	1	1	2	0	5	1	3
Adcyap1r1	512	999	491	141	449	269	382	402	3754	4817	2104	405
Add1	11180	8425	9842	13604	12150	14527	14430	14273	16225	17367	16147	17067
Add2	31	699	56	134	19	207	303	170	2987	3540	2042	99
Add3	9056	3980	6216	6872	7192	8183	7137	8681	10084	11798	8312	10179
Adgb	13	34	15	4	5	34	5	12	7	17	31	15
Adgra1	7	47	37	8	3	19	11	35	161	247	85	10
Adgra2	2586	5783	3962	7037	5331	9822	6863	5402	5173	5773	7865	8559
Adgra3	1716	2489	2060	2956	2301	3045	2415	2248	1979	2487	2400	2914
Adgrb1	62	239	117	91	74	56	239	111	846	808	532	411
Adgrb2	45	172	50	79	78	80	105	84	471	581	312	157
Adgrb3	18	576	122	27	3	70	259	111	1518	1805	1030	452
Adgrd1	1326	982	1058	1222	1501	1910	1195	1191	1275	1858	1131	1595
Adgre1	1326	329	1244	798	722	1724	838	1442	958	1677	872	1552
Adgre4	161	147	41	27	51	102	56	67	39	65	54	34
Adgre5	7463	8503	6325	7537	8710	8933	7012	7905	6845	7553	5976	6662
Adgrf1	0	0	2	1	0	0	1	0	2	1	1	0
Adgrf2	0	1	0	0	0	0	1	1	0	2	0	0
Adgrf3	33	8	15	2	3	5	8	23	7	8	6	12
Adgrf4	0	0	0	0	0	0	0	1	1	0	0	4
Adgrf5	21275	9705	15397	7378	12307	15250	11996	15792	16012	18067	9474	11365
Adgrg1	2952	1885	2881	1271	3641	1927	2643	2574	3231	3635	3042	2404
Adgrg2	426	180	241	95	208	237	333	374	564	660	253	335
Adgrg3	89	144	218	231	286	316	178	348	322	354	183	316
Adgrg5	146	124	71	64	37	110	42	38	67	88	65	77
Adgrg6	810	1015	766	612	418	932	1233	860	3682	3484	2122	1833
Adgrg7	0	0	0	0	0	0	0	0	1	0	2	0
Adgrl1	1654	3074	2114	3054	2251	2946	2751	2554	3969	4674	3479	3314
Adgrl2	5521	9077	6725	10734	9016	11149	9605	9144	6652	8090	9545	10624
Adgrl3	427	1216	556	260	342	399	846	570	3224	3469	2354	1258
Adgrl4	4005	2332	3396	1612	2722	2536	2072	2755	3435	3428	2607	2193
Adgrv1	49	35	58	48	29	112	43	45	209	112	70	59
Adh1	345	286	383	1677	857	1776	1518	1147	772	897	1269	1930
Adh4	11	9	22	9	20	6	28	40	35	27	7	20
Adh5	2309	962	1819	1724	2008	2041	2312	2258	2428	2406	2117	2162
Adh6	2	3	2	0	0	7	1	2	12	22	2	4
Adh6a	1	1	0	0	1	0	1	0	0	1	0	0
Adh7	44	25	45	162	75	183	124	155	177	205	88	168
Adhfe1	4818	656	3942	406	3171	781	1977	3934	2332	2825	594	1306
Adi1	1207	312	814	621	800	501	757	755	846	855	730	684
Adig	453	4	47	2	38	16	53	81	25	48	5	15
Adipoq	68259	10927	52969	5927	46237	13986	32756	52383	49762	49574	13047	21234
Adipor1	8843	5189	5647	6416	6784	7027	7819	7426	6809	7211	7182	7526
Adipor2	27988	3964	16701	4415	13620	6420	10100	12262	9676	9491	5381	7952
Adk	1419	1314	1431	1795	1618	1712	1895	1912	2576	2835	1582	1729
Adm	388	276	393	819	384	726	619	606	753	655	437	848
Adm2	0	0	0	0	0	0	0	0	0	0	0	0
Adnp	9573	5757	8131	8373	8314	9700	8750	8853	8533	10129	8972	9436
Adnp2	1929	1950	1975	3091	2787	3037	2336	2218	2279	2609	2315	3015
Ado	330	213	266	361	330	369	388	330	356	347	452	355
Adora1	3629	414	2597	166	3066	285	1953	1727	1989	1877	585	1192
Adora2a	538	175	401	85	367	403	199	240	261	396	172	232
Adora2b	64	82	113	124	110	166	109	76	90	101	178	174
Adora3	0	0	0	1	0	1	0	0	0	0	0	4
Adpgk	1393	992	1080	802	1107	1063	1197	1302	1362	1436	1141	1249
Adprh	1554	797	1092	1147	1076	1285	1303	1356	1260	1487	1217	1404
Adprhl1	397	387	143	96	561	504	175	117	159	313	77	227
Adprhl2	1002	719	833	925	993	1060	1073	1027	954	1046	959	1105
Adprm	835	495	622	574	575	739	692	665	740	712	745	677
Adra1a	4595	869	2518	1468	3056	1679	1893	2357	1077	1169	1258	1545
Adra1b	99	144	71	186	134	348	157	161	74	205	138	161
Adra1d	3741	2220	2123	3697	2312	2654	3392	3357	2249	2111	3666	3103
Adra2a	213	342	209	387	292	606	477	343	737	753	749	393
Adra2b	46	76	64	30	37	95	61	70	285	420	222	47
Adra2c	8	87	22	10	33	10	38	33	230	332	150	46
Adrb1	728	74	220	98	283	105	167	176	110	76	105	137
Adrb2	863	433	814	257	524	687	702	716	904	1068	472	819
Adrb3	6915	1388	6086	639	5014	1449	3483	5738	2720	3949	994	2127
Adrm1	2669	1639	1982	2111	2428	2210	2606	2659	2476	2544	2492	2694
Adsl	1717	996	1166	1039	1268	1119	1240	1612	1668	1443	1435	1311
Adss	4540	3466	3566	4945	5166	5309	5012	5054	4779	5532	4886	5071
Adssl1	4819	77	1051	69	1109	147	274	692	263	96	85	186
Adtrp	2505	28	241	18	250	13	62	249	56	18	10	48
Aebp1	16560	30628	35282	73834	44265	57970	58093	47388	56296	48613	61776	72825
Aebp2	3142	3235	3082	3739	3854	3878	3480	3581	3493	3706	3655	3806
Aen	1243	1136	1121	925	1179	1154	993	1169	931	850	1098	1065
Aes	8566	4474	5221	6299	7190	6923	7438	7059	7014	7326	6538	6652
Afap1	2542	3653	3086	4486	3885	4732	4136	4151	3808	4422	4378	4909
Afap1l1	1433	463	1077	387	916	595	657	1010	997	961	690	730
Afap1l2	1366	3786	2180	3117	3738	4756	3737	3090	4795	4486	4811	4792
Afdn	8526	3927	6396	3802	5953	5185	4928	5949	6143	6576	4623	5273
Aff1	6275	7249	7029	8876	7565	10122	8771	8335	8107	8602	9296	10311
Aff2	229	339	420	794	574	1066	686	661	753	939	660	736
Aff3	760	1139	1321	1773	1484	2066	1885	1630	2112	2065	2153	2039
Aff4	13643	12705	13946	21431	17652	21462	20806	17853	18485	19756	21518	21921
Afg3l1	1615	715	1162	869	1178	1081	1225	1173	1108	1144	915	1181
Afg3l2	10580	1718	4509	1941	3921	1961	2820	3878	2590	2652	2201	2567
Afm	2	4	2	16	15	12	7	1	10	4	14	16
Afmid	475	93	299	85	358	175	232	275	230	284	145	203
Afp	0	0	1	0	0	0	0	0	5	0	0	0
Aftph	3114	2472	2750	3176	2911	3551	3033	3149	3536	3757	3339	3402
Aga	1635	1121	1295	1832	1787	2102	1963	1747	1665	1988	1654	2422
Agap1	6918	8491	7203	11047	8916	12473	9817	9600	10862	10084	12321	12549
Agap2	524	269	325	79	244	173	178	283	551	479	330	174
Agap3	1981	2714	2128	3320	2698	3135	3075	3051	3404	3831	3863	3440
Agbl1	2	18	9	12	2	63	3	11	20	14	9	10
Agbl2	71	26	29	47	35	98	61	38	44	61	44	70
Agbl3	316	665	464	294	312	532	482	410	559	545	463	521
Agbl4	0	0	0	0	0	0	0	0	3	2	2	0
Agbl5	616	510	500	476	522	542	604	652	570	653	612	617
Ager	215	177	198	89	184	175	180	176	181	274	191	190
Agfg1	4266	5354	4061	7632	6790	7433	6667	6512	5590	7167	6195	7128
Agfg2	1365	1373	1157	1595	1668	1803	1793	1748	1699	1852	2042	2257
Aggf1	1069	759	880	851	1009	1063	1026	1040	1055	873	1090	1063
Agk	1289	588	937	646	903	776	946	940	963	1067	748	963
Agl	9678	5047	7460	6463	8155	8682	8521	7527	5540	6791	6857	8412
Agmat	15	9	11	18	17	25	13	35	27	23	19	16
Agmo	3188	597	2124	262	1226	933	1195	2359	1347	1859	612	920
Ago1	3692	3368	3961	4741	4106	5201	4921	4838	4622	5411	4721	5890
Ago2	2069	2743	2446	3132	3058	3364	3265	2939	3367	3696	3870	3578
Ago3	3386	5316	4063	4947	4745	5638	5017	4689	4545	5165	5163	5731
Ago4	415	216	317	142	198	354	245	295	364	359	181	233
Agpat1	4489	1933	2881	2370	3123	2639	3094	3109	3127	3481	3034	2860
Agpat2	26037	2477	15354	1460	15947	2473	7573	11880	7736	7906	1955	5517
Agpat3	18972	2071	9754	1902	7130	2670	4719	5989	6738	6569	2875	4247
Agpat4	722	1127	863	1137	943	1499	1056	1217	1473	1665	1492	1228
Agpat5	2339	2097	1767	2458	2196	2681	2380	2371	2260	2712	2661	2410
Agps	1556	1082	1464	1209	1468	1620	1465	1596	1760	2131	1447	1529
Agr2	22	28	18	19	45	80	47	51	37	25	27	20
Agr3	1	1	3	1	0	0	1	1	0	1	0	1
Agrn	7387	8541	7382	9525	8349	10316	9526	9174	9925	10584	10453	11197
Agrp	19	60	23	15	26	48	26	29	27	43	27	24
Agt	6515	447	5037	512	782	458	595	3698	3115	2896	856	428
Agtpbp1	4985	4266	3979	5495	4988	5935	5019	5270	6431	7328	7063	6297
Agtr1a	992	383	888	913	1005	1493	1081	1313	1902	2194	946	1378
Agtr1b	66	499	139	462	238	949	912	433	179	132	1331	1142
Agtr2	9	1	2	19	7	25	4	14	74	329	14	6
Agtrap	762	485	630	876	813	1053	1032	960	906	972	887	1225
Agxt	0	0	1	0	0	2	3	0	0	1	0	2
Agxt2	0	11	1	0	4	6	0	4	6	0	0	2
Ahctf1	5358	4954	5636	6296	5939	6532	7333	7287	7034	7857	7762	8171
Ahcy	2436	1265	1916	1748	2188	2138	2380	2363	2453	2595	2254	2436
Ahcyl1	28920	5867	14872	9937	14768	11087	12596	14678	10060	11060	9941	11435
Ahcyl2	4017	922	2953	1181	2471	1392	2258	2627	3509	3144	1658	1984
Ahdc1	5917	6139	5723	6567	6202	7168	6201	6476	5420	5597	6843	7390
Ahi1	1383	1567	1446	1696	1533	1787	1805	1730	1871	2182	1813	2186
Ahnak	176352	172612	222848	354306	248567	374655	337955	320253	355642	371515	385541	421715
Ahnak2	4789	12757	7995	9627	8898	15707	9666	9602	15579	15923	14213	15959
Ahr	1174	955	1099	521	787	1300	870	1083	1891	2068	1524	1042
Ahrr	25	24	52	14	35	67	27	95	57	88	42	65
Ahsa1	2589	1249	2001	3255	3525	2150	2434	2559	2320	2802	2629	3109
Ahsa2	853	1183	1029	3305	3047	1492	1063	1070	1236	1599	1857	2755
Ahsg	1	12	43	0	1	96	1	3	54	0	31	44
Ahsp	34	36	58	149	25	200	195	76	123	101	270	60
Aicda	1	3	1	1	2	3	1	2	3	2	1	1
Aida	3500	2431	2588	3913	4159	4740	4279	4200	3699	4551	4057	4337
Aif1	554	86	162	245	225	329	270	313	280	462	280	358
Aif1l	2501	658	1231	648	1562	1257	1309	1289	1476	1592	1086	1120
Aifm1	8371	761	3429	813	3188	999	1991	2699	1618	1430	978	1295
Aifm2	21732	1276	10350	1349	7852	2558	5479	8682	3684	3126	1863	3620
Aifm3	76	154	91	84	107	126	75	134	86	137	91	148
Aig1	5256	2080	5140	1397	4101	2585	2791	4344	2695	3742	1788	2757
Aim1	280	219	250	110	243	282	178	207	143	143	145	149
Aim1l	9	10	23	4	18	29	34	25	174	117	21	30
Aim2	58	74	52	23	20	96	25	61	105	49	20	33
Aimp1	503	295	337	425	526	503	524	574	545	591	511	540
Aimp2	1052	483	737	703	825	789	833	883	914	909	958	848
Aip	1797	1248	1700	2273	1954	2136	2268	2454	2143	2295	2488	2477
Aipl1	0	0	0	1	1	1	1	0	0	0	0	0
Aire	0	0	0	0	0	0	0	0	0	0	0	0
Ajap1	4	25	6	19	7	13	10	0	20	17	25	24
Ajuba	1034	1205	1245	1618	1372	1944	1651	1487	1299	1549	1466	1673
Ak1	4017	1151	1919	1941	2665	1828	2371	2505	1100	2149	2044	2304
Ak2	8685	1418	6150	1359	5949	1901	3779	4955	4104	3564	1795	2602
Ak3	6859	1636	3579	2825	3883	3009	3974	4423	3673	3717	3559	3871
Ak4	528	1035	575	1212	919	1399	1366	1021	1338	1428	1520	1637
Ak5	4	7	1	7	4	6	2	12	14	7	1	5
Ak6	238	113	225	216	258	244	256	256	230	250	251	254
Ak7	7	5	0	2	1	1	5	5	17	3	9	12
Ak8	5	7	6	0	4	6	3	13	2	19	2	9
Ak9	1	1	3	0	0	0	0	1	3	4	2	2
Akain1	0	0	0	0	0	0	1	0	33	31	13	0
Akap1	12301	3203	6061	3943	6658	4733	4570	5539	4015	3720	4353	4377
Akap10	2424	1786	2035	1900	1939	2484	2115	2294	2413	2719	2159	2468
Akap11	8137	9012	8563	12855	10742	14216	12488	11857	14432	16022	14615	13460
Akap12	4498	3705	4927	7713	6489	7467	6013	6876	11498	12861	7434	7897
Akap13	16311	22629	17737	25543	22794	29642	21879	21706	18534	23561	22099	26626
Akap14	4	14	9	8	13	15	12	14	24	19	4	10
Akap17a	1724	1468	1560	1832	1776	1857	1884	1866	1716	1871	1946	2134
Akap17b	477	890	668	1042	783	1148	1000	977	1191	1071	1254	1055
Akap2	21592	19005	18833	28997	36920	29436	24716	23653	20810	27194	23679	28713
Akap3	22	17	47	11	19	11	11	32	22	51	5	32
Akap4	0	0	0	0	0	0	0	0	0	0	0	0
Akap5	22	84	70	79	89	124	85	92	224	230	94	114
Akap6	7803	16202	10804	19942	17881	21074	16331	13591	16397	16506	19619	19687
Akap7	696	396	528	467	405	574	449	538	442	478	462	574
Akap8	3267	3779	3379	3742	3790	4122	4254	4586	4369	4385	4380	4745
Akap8l	2000	2856	2014	1873	2062	2140	2372	2697	2440	2798	2298	2800
Akap9	4967	5529	5783	6101	5560	6603	5455	5769	6480	6750	5899	6402
Akip1	266	500	444	662	585	769	678	567	560	628	786	778
Akirin1	2336	1386	1598	2415	2282	2323	2167	2145	2546	2860	2333	2079
Akirin2	2472	1915	2119	2591	2748	2978	2888	3007	2780	3021	3126	3002
Akna	1123	1671	1025	1144	893	1761	1096	1160	1420	1219	1476	1553
Aknad1	10	130	22	129	114	131	145	60	19	59	78	128
Akp3	0	0	0	0	0	0	0	0	0	0	0	0
Akr1a1	14370	9174	11619	16819	15788	17502	18580	16609	16693	18261	17563	19057
Akr1b1	8835	3918	6856	7040	7234	7733	8524	9004	9441	11353	6701	8908
Akr1b10	10	51	19	66	25	119	66	64	93	51	18	57
Akr1b7	0	35	6	19	7	33	10	4	19	16	58	26
Akr1b8	297	340	368	464	401	704	544	509	703	776	514	704
Akr1c1	0	0	0	0	0	1	0	0	0	4	0	0
Akr1c12	1566	322	1011	268	984	386	620	894	844	876	405	626
Akr1c12l1	9	0	0	0	1	5	2	8	2	0	1	0
Akr1c13	7	2	1	1	1	1	0	1	1	7	2	11
Akr1c14	4532	736	2354	2197	2622	3799	3196	3615	4046	4010	2682	3448
Akr1c19	590	486	657	493	584	694	763	843	1456	1457	782	1070
Akr1c2	0	0	0	0	0	1	0	0	0	0	0	1
Akr1c3	121	9	30	28	74	71	25	97	92	224	6	39
Akr1cl	17806	1211	7700	1316	5950	3305	4660	7124	3190	3126	1783	2968
Akr1d1	4	1	0	0	3	5	0	2	4	3	1	1
Akr1e2	4094	304	2477	256	1725	385	1403	1927	1213	1381	405	843
Akr7a2	2737	362	1656	686	1787	607	1493	1607	1525	1673	723	1134
Akr7a3	30	3	9	0	10	13	11	9	39	33	8	5
Akt1	8357	5110	6930	7543	7972	8570	8749	8475	7527	8038	8480	8658
Akt1s1	1776	1092	1429	1279	1567	1507	1612	1621	1712	1736	1538	1693
Akt2	23684	5137	15883	6589	15796	8045	11045	14553	9360	11050	7014	9926
Akt3	1124	1575	1248	2334	1946	2870	2222	2110	2167	2490	2616	2550
Aktip	2204	1171	1924	2220	1899	2338	2437	2282	2659	2834	2453	2577
Alad	5029	617	2996	479	2836	715	1862	2751	2222	1851	756	1445
Alas1	12261	1036	5753	1374	5451	1408	2377	3688	2239	2265	1263	2194
Alas2	614	763	1254	2912	670	5348	3786	979	1261	1010	4583	1172
Alb	12507	584	3045	259	2445	1603	1352	2569	2199	2075	901	1314
Alcam	1148	1365	1360	1512	1134	1499	1883	1849	4861	5191	2547	2408
Aldh16a1	2133	999	1473	876	1357	1274	1485	1644	1363	1297	1225	1293
Aldh18a1	258	368	147	792	272	798	398	383	67	183	256	379
Aldh1a1	143	119	110	96	132	193	161	142	399	443	241	322
Aldh1a2	534	40	191	89	182	102	161	147	297	265	207	118
Aldh1a3	887	360	1118	1016	1166	3076	1087	1690	1713	2230	619	1284
Aldh1a7	7	9	15	4	15	14	20	14	17	20	10	22
Aldh1b1	0	2	2	0	4	5	0	6	30	14	13	4
Aldh1l1	1672	357	1323	224	1595	244	1155	1160	1302	1302	326	884
Aldh1l2	219	202	278	447	316	421	295	289	223	409	231	345
Aldh2	15344	12729	19269	21890	22881	21927	28168	26343	23954	23183	21182	27316
Aldh3a1	556	202	433	1232	709	1176	1350	1207	953	1014	1288	1846
Aldh3a2	5480	2551	3845	3897	3913	4456	4521	4467	4705	5414	4317	5086
Aldh3b1	148	176	167	71	129	233	182	159	236	244	171	187
Aldh3b2	1	7	0	0	0	0	0	0	2	6	14	2
Aldh4a1	7455	656	2232	602	2355	541	1558	2229	1983	1777	1038	1282
Aldh5a1	9148	864	3095	885	3479	980	1388	2068	1477	1608	1081	1340
Aldh6a1	19475	4778	13627	7461	13329	7351	11534	14836	11295	11605	7825	9923
Aldh7a1	5302	1332	3447	2014	3471	1938	2981	3620	2696	2967	2348	2699
Aldh8a1	26	21	54	31	33	79	45	59	45	30	33	34
Aldh9a1	4735	1743	4615	2519	4100	2369	3952	4505	4077	4293	2694	4068
Aldoa	101182	16153	69706	19722	58632	20720	46894	57307	47985	49077	27151	39028
Aldoart2	0	0	0	0	0	1	0	0	0	2	4	0
Aldob	127	20	90	15	94	32	98	152	154	61	18	122
Aldoc	272	1271	430	835	335	722	1182	789	4272	4926	3492	1599
Alg1	496	562	447	512	599	625	755	643	580	632	651	704
Alg10	1733	942	1522	1611	1645	1544	1697	1682	1457	1839	1583	1592
Alg11	2388	1435	2186	1810	2283	2272	2312	2476	2918	3086	2414	2320
Alg12	635	402	461	388	553	535	490	564	511	545	542	491
Alg13	887	422	575	512	536	534	494	595	682	682	494	523
Alg14	1147	546	740	1004	1068	1000	881	947	923	1074	1045	1098
Alg2	2020	1145	1344	1157	1374	1563	1427	1600	2537	3015	2084	1580
Alg3	962	384	501	538	916	603	768	712	838	740	594	644
Alg5	841	544	572	705	673	855	854	825	826	1014	740	935
Alg6	873	2127	695	815	757	1065	809	802	887	934	844	874
Alg8	491	385	549	317	476	446	425	567	457	545	406	487
Alg9	1669	996	1341	965	1197	1284	1391	1471	1603	1619	1222	1272
Alk	28	172	54	10	20	32	130	44	409	466	326	246
Alkbh1	1437	1123	1372	1269	1578	1456	1319	1490	1354	1586	1298	1439
Alkbh2	79	32	93	65	92	61	124	118	106	82	63	117
Alkbh3	2735	1007	1752	909	1610	1110	1258	1255	1125	1243	1001	1170
Alkbh4	158	169	126	160	147	197	178	185	218	180	200	189
Alkbh5	3137	2321	2745	3183	3012	3407	3209	3291	3153	3548	3340	3626
Alkbh6	17	2	9	96	4	20	20	20	35	49	10	32
Alkbh7	666	307	443	405	482	479	501	606	530	516	473	546
Alkbh8	1175	1030	1147	1201	1197	1304	1334	1336	1522	1574	1502	1425
Allc	0	1	1	0	0	0	2	0	0	1	0	0
Alms1	2843	3320	3200	2824	2727	3447	3218	3564	3947	4400	3478	3670
Alox12	179	5595	185	194	160	616	172	172	243	359	593	350
Alox12b	1	0	0	0	0	0	0	0	0	0	0	0
Alox12e	6	0	0	0	2	1	1	1	0	1	1	0
Alox15	67	33	76	214	26	310	159	39	168	55	395	70
Alox15b	0	0	0	0	0	1	0	0	0	3	0	2
Alox5	518	123	190	213	240	365	221	294	281	404	185	298
Alox5ap	371	102	133	182	180	287	267	294	277	339	241	323
Aloxe3	15	20	25	14	16	28	21	14	30	27	18	20
Alpi	0	0	0	1	0	2	0	0	0	1	0	0
Alpk1	1712	1618	1753	2058	1866	2294	1979	1934	1871	2085	2233	2546
Alpk2	11	26	5	12	15	35	0	10	11	3	8	8
Alpk3	417	779	256	524	634	977	879	361	660	585	642	883
Alpl	709	197	653	1215	1441	1156	924	1009	644	1105	1082	1644
Alpp	0	11	11	0	6	10	4	3	19	24	16	14
Alppl2	226	878	490	496	367	1037	539	520	1028	1359	490	971
Als2	1762	1410	1671	1313	1770	1695	1633	1828	2002	2096	1743	1952
Als2cl	1582	3515	2026	2281	2671	3643	3354	2791	2479	2793	3437	3345
Als2cr11	0	0	1	0	0	1	2	0	1	0	0	0
Als2cr12	87	15	27	17	99	44	17	34	25	16	16	23
Alx1	0	28	2	45	3	54	5	7	25	0	90	22
Alx3	0	0	7	16	1	23	2	12	13	3	11	9
Alx4	40	7	28	7	18	12	16	21	15	2	13	14
Alyref	1007	764	873	1511	1408	1440	1416	1305	1174	1378	1392	1426
Amacr	800	183	457	258	476	270	398	447	352	469	238	388
Ambn	3	3	11	1	4	5	1	5	2	2	3	2
Ambp	4	9	22	5	4	54	17	8	33	6	26	24
Ambra1	4268	6311	4713	7213	5070	7698	7107	5914	5691	5676	7931	8202
Amd1	3276	5396	3376	4613	4578	5277	5066	4489	4419	5274	4876	4987
Amdhd1	0	0	0	0	1	3	0	1	5	6	2	1
Amdhd2	519	420	452	451	452	554	443	571	518	545	528	615
Amelx	24	112	80	44	51	86	40	62	31	57	59	44
Amer1	719	783	799	909	852	1130	1025	1071	1116	1160	1113	1243
Amer2	0	23	0	3	0	1	5	4	62	105	32	9
Amer3	1	23	0	0	0	2	3	9	174	212	59	3
Amfr	15352	7707	10803	10013	11145	11588	11818	12109	12089	12783	11843	12602
Amh	12	27	6	24	19	26	13	21	27	38	18	8
Amhr2	106	26	39	15	31	20	20	31	50	19	34	21
Amigo1	1987	1250	1195	1154	1266	1812	1453	1484	2615	2971	1968	1390
Amigo2	915	2012	1640	4089	2426	2984	3032	2365	2827	2641	5161	3525
Amigo3	297	408	342	419	375	453	412	409	361	427	445	515
Ammecr1	393	245	348	426	388	450	358	376	320	490	381	349
Ammecr1l	5454	3198	4399	4136	5414	3912	3882	4597	3671	4381	3590	4621
Amn	4	3	2	1	0	1	1	0	4	0	3	0
Amn1	500	309	490	422	407	449	462	514	575	655	462	512
Amot	362	369	411	534	496	871	627	476	593	764	629	680
Amotl1	7455	5921	6264	10360	9137	11551	9554	8626	9214	9524	10366	10814
Amotl2	12288	5725	9630	11800	11996	9285	8374	10365	9661	9881	10209	12061
Ampd1	11	9	15	7	10	6	15	17	47	14	6	20
Ampd2	4115	1667	3131	1888	2729	2205	2570	3013	2422	2859	2199	2548
Ampd3	1881	566	973	483	942	1042	726	890	984	1142	697	702
Amph	13	47	15	52	15	92	31	37	118	154	153	26
Amt	440	583	598	553	592	500	737	738	879	822	766	729
Amtn	11	27	35	3	7	30	12	28	36	17	12	9
Amy1a	0	0	0	7	0	0	0	0	0	0	1	1
Amy2a3	0	1	25	23	22	15	0	0	11	7	34	34
Amz1	488	475	476	397	443	542	422	507	641	736	540	554
Amz2	1557	1262	1509	1985	1720	2104	2279	2156	2316	2483	2339	2438
Anapc1	7355	5496	6899	8908	7124	8564	8360	9016	8525	9550	8707	9456
Anapc10	528	376	428	620	525	647	771	652	693	766	690	654
Anapc11	1244	811	1166	1484	1494	1664	1760	1696	1333	1684	1650	1737
Anapc13	832	232	477	311	510	398	498	525	442	460	350	363
Anapc15	725	366	515	450	597	558	579	581	546	579	437	559
Anapc16	816	500	636	653	707	871	936	918	720	752	836	810
Anapc2	3706	3027	3052	3924	3482	4282	4217	4013	4393	4709	4255	4891
Anapc4	2546	2223	2336	2389	2259	2638	2683	2783	2892	3228	2783	2830
Anapc5	11837	6454	8174	8558	9031	9352	9928	9957	9359	10799	9492	10434
Anapc7	1537	1935	1582	2035	1857	2085	1869	1809	1850	1981	2108	2338
Andpro	0	0	1	0	0	0	0	0	1	0	0	0
Ang	48	50	42	63	63	127	88	91	94	113	73	110
Ang2	0	0	1	0	0	0	0	0	1	2	1	1
Angel1	391	201	388	167	335	285	285	294	477	455	255	303
Angel2	2841	1603	2356	2222	2342	2347	2628	2592	2281	2478	2497	2817
Angpt1	1447	2933	894	1212	783	1883	1438	1217	1373	1277	1838	1209
Angpt2	1579	1860	1548	2879	1704	3916	3197	2607	2489	2829	4197	3313
Angpt4	62	70	89	156	71	133	245	149	272	199	430	235
Angptl1	868	214	544	915	618	1080	827	775	663	894	637	884
Angptl2	6743	3298	7297	6226	8022	6231	7965	9210	5804	8406	6021	7548
Angptl3	66	225	127	101	72	167	147	170	180	189	175	172
Angptl4	5405	526	4374	631	3184	2249	3434	3117	1697	2234	841	2271
Angptl6	1	4	18	1	11	3	7	6	10	19	20	10
Angptl8	2442	237	1617	155	1613	377	1138	1666	1389	1070	370	658
Ank1	85	62	43	48	35	62	113	44	136	125	177	31
Ank2	11464	15006	10638	18251	13355	17486	16882	13969	29185	32307	23649	19709
Ank3	1633	3256	2238	1095	1560	1990	2770	1899	8976	8610	4753	5038
Ankar	58	113	73	40	53	57	86	107	60	67	57	75
Ankdd1a	164	44	65	21	96	59	33	56	40	44	48	48
Ankdd1b	25	17	13	15	5	31	11	31	18	36	46	34
Ankef1	4786	1178	3833	612	2821	1024	2156	4388	3668	3624	1013	1665
Ankfy1	6462	6302	6534	7857	7555	9329	7736	8132	8113	9740	8311	9172
Ankh	6072	4040	4414	4608	5429	6027	5101	5370	4974	5046	5460	6115
Ankhd1	6830	5570	6402	6778	7059	8130	7381	7345	7909	8436	7344	8140
Ankib1	3347	2459	2832	2888	2902	3505	2949	3112	3391	3752	3296	3265
Ankk1	1	2	0	1	0	0	2	1	36	95	18	1
Ankle1	88	96	85	30	115	46	92	78	40	38	87	136
Ankle2	3602	3216	3743	3820	3947	4298	4173	4124	4356	4601	4445	4587
Ankmy1	218	487	316	392	378	418	400	345	459	570	395	500
Ankmy2	2681	2056	2334	3009	2493	3273	2967	2978	3184	3469	3277	3521
Ankra2	5	11	24	10	18	35	6	32	58	52	16	10
Ankrd1	84	70	46	82	103	114	86	114	46	135	103	94
Ankrd10	11413	7519	11642	5219	9241	5982	7917	10851	8741	10353	6394	7897
Ankrd11	6590	5870	6203	6648	7474	7762	7277	7318	7400	7630	7704	8338
Ankrd12	3723	5856	5292	9876	6994	8523	8869	8756	8189	8640	9668	9799
Ankrd13a	7957	3999	5606	5512	5750	5960	5996	6362	5390	5764	5863	6152
Ankrd13b	689	809	747	861	755	1116	1100	1087	1211	1390	1241	1154
Ankrd13c	5455	2124	3199	2281	3154	2887	3001	3408	3104	3254	2880	2710
Ankrd13d	116	146	121	91	89	105	123	106	329	307	202	179
Ankrd16	169	272	229	109	160	217	231	235	290	253	240	270
Ankrd17	12836	8887	10654	10633	12548	12058	11593	11748	11418	13530	11262	12234
Ankrd2	40	2	10	2	7	3	2	5	4	3	4	3
Ankrd22	0	0	0	0	0	0	0	0	0	0	0	1
Ankrd23	68	90	89	31	27	69	69	102	171	80	103	60
Ankrd24	69	14	35	39	38	96	25	78	14	27	21	54
Ankrd26	406	449	455	401	399	516	446	510	640	635	480	434
Ankrd27	2705	1639	1789	1768	1933	2197	1907	2108	1860	2183	1970	2216
Ankrd28	3769	3956	3817	4284	3912	5308	3812	3855	3884	4776	4969	5366
Ankrd29	473	834	610	1291	1142	1481	1413	1103	1501	1777	1402	1544
Ankrd30a	0	0	0	0	0	0	0	0	0	0	0	0
Ankrd31	0	0	0	0	0	2	0	0	0	0	0	1
Ankrd33	1	2	4	6	4	10	12	5	5	7	8	3
Ankrd33b	92	100	117	75	72	187	91	87	115	133	95	112
Ankrd34a	180	220	125	165	168	195	203	223	299	246	290	207
Ankrd34b	1	8	1	1	2	1	0	1	51	31	25	7
Ankrd34c	0	3	4	0	1	40	2	1	9	29	2	5
Ankrd35	14	18	38	27	15	49	39	13	34	37	17	40
Ankrd36	0	2	2	2	3	1	0	0	7	12	7	5
Ankrd37	36	25	33	48	40	48	43	65	44	54	40	31
Ankrd39	82	55	65	61	90	113	91	91	92	75	86	111
Ankrd40	8308	1960	4261	4340	5436	4247	5053	4970	4517	4655	4865	4904
Ankrd42	355	436	362	478	411	584	484	396	540	530	492	585
Ankrd44	2083	2677	2469	2931	2326	3374	2667	2812	3105	2828	3029	3240
Ankrd45	55	66	36	36	45	78	38	36	93	74	112	76
Ankrd46	4198	2187	3111	2986	3285	3214	3453	3707	3985	4263	3416	3537
Ankrd49	712	378	615	564	569	789	762	712	672	909	662	694
Ankrd50	4140	4082	3905	5298	4638	5816	4833	4306	4256	4580	5106	5465
Ankrd52	2499	2493	2222	2627	3087	2966	3295	3040	3453	3615	3596	3434
Ankrd54	859	558	600	630	652	710	714	778	760	764	874	744
Ankrd55	82	132	78	89	69	134	111	104	739	368	285	176
Ankrd6	622	369	563	94	433	157	346	548	1169	1426	573	273
Ankrd61	120	265	183	139	138	159	165	205	174	215	181	230
Ankrd63	594	399	620	152	564	490	337	491	624	572	237	372
Ankrd65	0	0	1	0	0	0	1	0	0	1	0	0
Ankrd66	11	4	11	7	1	24	3	10	2	14	7	2
Ankrd7	9	18	41	11	15	20	32	16	26	45	22	19
Ankrd9	3453	488	1191	518	1187	442	708	916	542	482	562	655
Anks1a	2725	4037	3080	3700	3156	3815	3395	3506	4810	5060	4759	5231
Anks1b	13	130	24	3	11	22	22	21	352	430	289	24
Anks3	940	1229	942	843	981	1059	1019	1291	1265	1196	1194	1353
Anks4b	0	4	1	6	3	11	1	9	11	12	3	0
Anks6	446	877	484	654	622	846	711	611	661	790	735	871
Ankub1	14	35	39	18	24	22	26	11	32	58	19	26
Ankzf1	1779	2534	1889	2158	2276	2412	2590	2338	2473	2466	2422	2941
Anln	539	624	335	728	897	782	696	578	447	686	733	1109
Anlnl1	99	104	37	142	162	177	194	152	112	115	133	247
Ano1	9199	4003	4124	1783	4165	4237	2612	3337	1791	2693	1966	3271
Ano10	6321	3224	5299	4659	5451	5103	5634	5988	6349	5954	5247	5837
Ano2	150	27	88	47	77	153	48	52	46	58	30	35
Ano3	0	1	0	0	0	0	0	0	5	4	1	0
Ano4	75	25	42	16	27	22	21	39	36	56	35	25
Ano5	0	1	0	0	0	4	0	2	15	10	0	0
Ano6	12788	14789	11855	17838	16421	19746	16805	16294	15380	18331	18136	18948
Ano7	6	6	14	8	6	13	10	15	15	7	7	24
Ano8	1256	1864	1326	1714	1471	1834	1683	1685	1871	2017	1861	2045
Ano9	5	0	6	1	1	1	1	0	2	5	4	4
Anp32a	3682	757	2071	1248	2257	1773	1825	2073	1832	1958	1445	1728
Anp32b	2064	1088	1682	2346	2139	2265	2567	2420	2439	2742	2541	2588
Anp32e	4187	2515	3636	4988	4348	4382	5165	4964	4481	5340	5091	5231
Anpep	2324	1046	2133	3062	2573	4593	2505	3345	2835	4257	2088	2909
Antxr1	8225	9197	9522	16946	12759	17430	14299	12564	10575	14015	16135	18052
Antxr2	4065	2743	4062	5892	4533	7844	4778	5374	6010	8440	4683	6832
Antxrl	0	0	0	0	0	0	0	0	0	1	0	0
Anxa1	10672	15122	11086	20370	15635	23871	19653	19968	19308	25350	18918	20717
Anxa10	0	0	0	0	0	0	0	0	0	0	0	0
Anxa11	7337	5579	5413	8291	7877	8533	8469	8024	7137	8321	8470	9737
Anxa13	24	44	23	49	19	86	64	39	53	46	83	53
Anxa2	8540	8308	7548	13428	12290	14242	14517	13419	13399	16600	14897	15207
Anxa3	2146	702	1103	651	1079	2015	934	1110	1389	1449	916	940
Anxa4	5188	4826	4647	8881	8004	10079	9669	8285	6836	9305	9914	9966
Anxa5	12986	6046	7960	14364	12503	11107	14451	13708	12341	14261	13551	15448
Anxa6	23175	12784	16676	21744	22107	21028	22942	22818	24375	25443	22675	24271
Anxa7	4632	4024	4915	5738	5689	6656	6568	6467	6684	7779	6355	7188
Anxa8	10	9	3	4	4	20	3	9	20	17	11	18
Anxa9	58	96	39	34	29	60	60	79	92	95	78	87
Aoah	86	104	131	40	27	121	32	60	42	77	60	52
Aoc1	0	0	0	0	0	0	0	0	0	1	0	0
Aoc3	68852	51033	70526	95517	91454	96274	88263	91750	77955	87019	81220	100386
Aox1	9628	5635	11444	4960	9109	6396	8172	11517	6316	11538	5305	8151
Aox2	20	17	29	23	6	14	7	17	31	24	5	16
Aox3	8294	3303	10514	5517	7904	7340	9453	11264	16110	13189	5823	9571
Aox4	0	3	8	0	2	0	0	3	1	3	2	2
Ap1ar	1379	898	1033	1303	1197	1338	1335	1329	1527	1546	1582	1461
Ap1b1	5234	2005	2920	2591	3004	2964	3146	3415	3304	3820	3026	3200
Ap1g1	6169	2508	3836	3581	4713	3923	4205	4207	4337	4529	3974	4172
Ap1g2	595	465	630	254	583	590	616	707	709	800	449	578
Ap1m1	3917	1911	2504	2263	2825	2408	2732	2729	2564	3102	2757	2690
Ap1m2	0	0	0	0	0	0	0	0	0	0	0	1
Ap1s1	1730	935	1252	1302	1557	1386	1582	1433	1568	1857	1667	1495
Ap1s2	1520	1286	989	1635	1273	1939	1695	1601	2089	2553	1929	1538
Ap1s3	34	27	42	14	36	56	30	33	73	48	39	20
Ap2a1	4299	3563	3510	4072	4097	4279	4394	4485	5132	5724	4880	4901
Ap2a2	11084	5104	8330	6500	7657	8221	8274	8585	10762	12001	8760	8379
Ap2b1	12625	8975	9738	12749	11856	13265	13200	12845	13474	15148	14149	14279
Ap2m1	6693	7102	5171	7592	6800	8315	8087	8091	9726	12240	9430	9027
Ap2s1	1759	781	1029	1219	1410	1235	1456	1514	1560	1750	1410	1350
Ap3b1	5546	3551	3917	4429	4536	5213	4937	5141	4695	5409	4648	5158
Ap3b2	24	231	11	2	16	25	48	72	1128	1472	595	32
Ap3d1	7441	5024	5599	6186	6449	6553	6858	6707	7784	8813	7237	7367
Ap3m1	2945	2078	2471	2631	2874	2966	2628	2689	2977	3256	2907	2952
Ap3m2	539	386	438	485	627	636	739	665	1168	1003	810	809
Ap3s1	1263	962	831	886	979	1151	950	1167	1260	1661	1217	984
Ap3s2	1080	630	823	761	866	957	872	946	940	1121	945	896
Ap4b1	1562	1026	1273	1237	1306	1514	1305	1345	1454	1441	1442	1542
Ap4e1	1065	1287	1185	1454	1336	1615	1300	1373	1370	1661	1447	1658
Ap4m1	684	772	709	785	736	755	808	880	820	1004	924	1118
Ap4s1	877	525	648	709	633	727	677	696	678	810	514	736
Ap5b1	780	597	714	826	718	737	761	863	778	837	738	822
Ap5m1	2200	1188	1538	1186	1363	1611	1511	1671	1480	1663	1438	1606
Ap5s1	788	367	610	572	660	708	645	713	674	715	614	679
Ap5z1	771	891	880	765	812	997	982	1051	966	1036	958	1113
Apaf1	1525	1557	1690	1832	1808	2291	1663	1632	1901	2228	1657	2156
Apba1	693	1576	1033	1705	1362	1648	1502	1399	4493	5038	3074	1453
Apba2	11	227	35	36	14	51	83	89	777	938	491	81
Apba3	1547	961	1292	1186	1317	1359	1521	1513	1233	1239	1408	1422
Apbb1	1797	2864	1721	3015	2338	3594	3266	2818	3704	4063	4122	3503
Apbb1ip	403	190	243	210	211	516	229	253	307	446	270	248
Apbb2	3326	3631	3456	3291	3579	5268	3723	3702	4970	5398	4663	4316
Apbb3	1240	1844	1300	1481	1341	1599	1591	1655	1673	1753	1773	1809
Apbh	0	6	0	5	0	1	1	1	1	0	5	2
Apc	5767	5399	5758	6831	6548	7782	7274	6797	10704	11943	8640	8257
Apc2	1325	2230	1391	1217	1315	1612	1715	1300	4776	4642	3203	2568
Apcdd1	1819	1937	2770	3981	2295	3938	4686	4604	5759	4550	4833	4990
Apcdd1l	77	81	111	76	68	148	91	74	125	118	171	127
Apcs	0	0	4	0	0	0	0	0	0	0	0	2
Apeh	3554	1384	2169	1305	2016	1742	2038	2190	2029	2227	1825	2225
Apex1	1038	542	787	684	1072	801	963	996	1206	1299	916	880
Apex2	452	453	419	313	506	476	430	510	484	563	409	586
Apex2l1	1	0	0	0	0	3	1	0	3	1	0	0
Aph1a	4440	1622	3013	2401	2925	2500	3128	3237	2659	3046	2840	2993
Aph1b	5	38	14	13	4	28	27	23	12	25	6	43
Api5	11184	4496	7190	7061	8408	7531	8286	8825	7771	8690	7719	8042
Apip	509	176	367	241	386	259	380	437	520	470	291	323
Apitd1	40	33	22	22	31	36	39	24	44	36	44	43
Aplf	614	679	504	577	442	581	485	820	854	840	518	628
Apln	728	33	275	20	308	39	86	143	94	81	56	45
Aplnr	4709	1576	3409	966	1850	1021	1412	2584	2076	1982	1535	1353
Aplp1	170	399	180	95	147	264	166	218	1385	1922	735	187
Aplp2	31256	19216	25206	27695	30449	30440	29557	31550	30537	33654	28716	33265
Apmap	19383	2328	11740	2664	9515	4153	6044	9427	5728	5433	3312	4491
Apoa1	14	4	13	3	9	20	6	12	22	19	23	9
Apoa2	3	0	28	1	6	20	7	12	3	8	5	22
Apoa4	0	6	1	0	1	9	0	1	2	0	9	0
Apoa5	4	14	16	13	12	29	6	6	11	6	14	18
Apob	13	37	99	18	21	322	17	43	184	57	46	79
Apobec1	295	108	318	134	241	331	196	227	318	459	152	258
Apobec2	33	28	33	16	32	22	35	40	68	33	23	43
Apobec3b	59	86	64	46	39	101	58	97	92	95	53	90
Apobec4	6	5	5	14	10	12	3	11	14	11	7	17
Apobr	241	89	91	96	123	156	118	85	103	87	103	130
Apoc1	2	1	12	3	0	26	3	5	14	5	9	17
Apoc2	0	1	2	0	0	2	1	1	4	4	1	4
Apoc3	65	8	55	0	15	37	15	28	74	44	22	26
Apoc4	0	0	1	0	1	12	0	0	2	4	4	1
Apod	31	116	251	24	14	31	536	221	3732	2607	1902	1611
Apoe	5776	6775	6185	5857	5359	7543	10217	10427	19657	24429	13898	14953
Apof	1	1	1	1	2	14	0	0	4	4	2	4
Apoh	2	8	12	0	1	34	1	1	13	1	11	23
Apol11a	1273	276	704	217	657	525	648	627	460	402	389	457
Apol2	0	0	0	2	6	1	0	4	1	3	7	1
Apol3	1210	697	917	693	901	1552	1059	1071	1037	1163	954	910
Apol9a	891	448	816	552	1030	676	846	1110	575	847	318	658
Apold1	1491	1200	1596	1147	1608	2129	628	1229	1309	1657	1012	1718
Apom	83	59	65	52	95	77	104	87	36	82	78	50
Apon	1	2	1	0	1	0	0	0	5	0	0	0
Apoo	2919	364	1494	391	1388	467	938	1287	918	861	553	637
Apool	2724	314	1317	446	1087	565	758	1077	677	739	493	614
Apopt1	16	70	85	27	6	23	88	8	6	92	20	16
App	25674	18266	19503	37356	30910	36009	34289	32661	34608	39177	33065	37587
Appbp2	6962	3823	5433	5478	6294	5810	5924	5878	5759	6486	5692	5876
Appl1	4185	3432	4310	5341	4640	5247	4951	5264	5531	6562	5478	5376
Appl2	1302	994	1491	1079	1202	1391	1179	1400	1460	1746	1143	1530
Aprt	1943	1251	1668	2413	2275	2599	2602	2763	2410	2982	2536	2694
Aptx	433	400	402	432	396	536	487	527	478	533	547	557
Aqp1	42673	50163	34496	48034	48312	68081	51703	46080	41011	50228	42587	57731
Aqp11	127	33	36	23	25	24	29	54	154	127	61	37
Aqp12a	1	5	0	0	1	4	0	0	3	11	4	0
Aqp2	0	0	0	0	0	0	0	2	0	0	0	0
Aqp3	0	0	0	0	0	0	0	0	0	0	0	0
Aqp4	0	2	0	0	0	0	3	1	10	58	0	0
Aqp5	0	0	2	0	0	0	0	0	0	1	0	0
Aqp6	0	0	0	0	0	0	0	0	0	0	0	0
Aqp7	13008	564	6235	336	5259	740	3088	4546	3235	2596	880	1819
Aqp8	0	0	3	1	1	1	1	4	18	2	0	6
Aqp9	8	15	3	3	3	21	3	5	4	5	17	9
Aqr	3862	2717	3240	3552	3621	3849	3977	4054	3803	4464	4053	4265
Ar	924	1051	1389	2200	1537	2633	2282	2086	2191	2192	2079	2446
Araf	4155	3680	3606	4209	4298	4352	4597	4511	4325	4607	4423	4728
Arap1	4764	6422	4254	5347	5664	6864	5484	5116	5483	5846	6177	7679
Arap2	419	357	395	102	315	396	368	290	472	412	314	392
Arap3	2936	1871	2661	1280	2399	2602	2106	2498	2909	3097	2108	2202
Arc	1307	809	932	1906	1416	574	322	304	280	700	307	893
Arcn1	13784	7232	10828	15229	14485	14656	16262	14743	13562	16562	14376	15769
Areg	0	0	0	0	0	0	0	0	0	0	0	0
Arel1	6737	3169	3978	3625	4424	4193	4112	4604	4322	4727	4365	4443
Arf1	17393	8969	12272	18217	17329	17113	19459	17573	16159	18537	18047	19686
Arf2	1722	1964	1633	3461	2887	3300	2820	2427	2093	2577	2737	3040
Arf3	7514	7329	6844	10706	9279	11299	10993	9945	11389	13390	12118	11841
Arf4	8916	6128	6843	11397	10668	10096	10055	9593	8246	10993	9318	10995
Arf5	2612	1556	2058	2426	2293	2553	2509	2645	2196	2873	2512	2511
Arf6	9733	1782	12202	2727	3085	2707	2986	2605	2404	2941	2711	2928
Arfgap1	2550	3400	2811	3654	3781	3754	3634	3427	3273	3961	3528	4195
Arfgap2	2444	1883	2083	2143	2230	2284	2341	2512	2336	2330	2226	2553
Arfgap3	1445	2124	1767	2493	2602	2921	2766	2241	2017	2670	2490	3209
Arfgef1	8172	5154	6207	5805	6525	6787	6466	6823	6940	7659	6635	6740
Arfgef2	11189	4185	7415	4713	7095	5854	6076	6979	6708	6919	5256	6358
Arfgef3	367	699	473	626	425	755	565	547	2147	2573	1141	625
Arfip1	2945	2278	2630	3702	3200	3907	3534	3448	3202	3896	3380	3580
Arfip2	2310	3265	2279	2744	2540	2821	2964	2959	2773	2986	3014	3073
Arfrp1	1888	1462	1662	1949	1919	2324	2044	2176	2094	2111	2107	2254
Arg1	62	38	55	49	61	106	45	79	118	92	75	110
Arg2	173	130	161	190	186	215	199	167	249	261	257	180
Arglu1	879	1163	935	1025	1071	1211	1086	1013	989	1092	1137	1154
Arhgap1	6895	8372	7045	12254	9969	12028	12418	10462	8601	9486	11835	12938
Arhgap10	2292	2607	2231	2768	2070	4230	2424	2807	2651	3296	3158	3177
Arhgap11a	388	139	302	189	248	270	298	275	321	361	325	416
Arhgap12	2053	1277	1584	1357	1439	1765	1547	1804	1992	2304	1610	1741
Arhgap15	178	254	181	82	105	301	102	104	315	209	154	179
Arhgap17	3075	4524	3606	4225	3740	5118	3927	3796	4096	4611	4193	4649
Arhgap18	1005	493	851	288	688	606	422	600	615	640	410	489
Arhgap19	554	542	465	748	585	657	755	577	659	810	805	829
Arhgap20	1310	401	1173	364	867	795	799	917	989	1331	499	756
Arhgap21	6423	5137	5791	5981	6153	8012	6037	6836	6591	7984	6014	7026
Arhgap22	180	324	153	168	153	280	144	141	456	588	326	256
Arhgap23	2588	4732	3088	5839	5215	5716	4640	3984	4292	5211	5097	5776
Arhgap24	1306	813	1064	1247	1240	1437	1270	1281	1396	1469	1422	1444
Arhgap25	426	337	332	121	247	497	121	235	294	279	219	230
Arhgap26	1733	2173	1551	1119	1246	2030	1198	1335	4885	5437	3124	1334
Arhgap27	693	496	614	210	499	545	347	475	485	523	416	365
Arhgap28	538	956	512	341	367	608	250	478	671	824	430	332
Arhgap29	14664	4189	10198	5983	9553	7528	8163	10301	8416	9437	6877	8172
Arhgap30	517	329	332	254	240	500	262	297	398	428	280	318
Arhgap31	5031	4192	4809	3834	5561	5795	5388	5210	5541	6396	5099	5578
Arhgap32	4877	4726	4981	4473	4791	5582	5087	5241	6411	7385	4912	5438
Arhgap33	143	376	207	224	217	203	291	247	326	391	310	295
Arhgap35	14040	7444	10314	10318	11464	11434	10627	10357	10711	11688	10621	11612
Arhgap36	0	0	1	0	0	1	0	1	2	18	5	1
Arhgap39	564	1261	693	793	570	706	992	734	2048	1881	1700	1500
Arhgap4	355	543	265	264	243	360	290	294	447	457	359	416
Arhgap40	4	10	8	7	2	5	2	7	7	8	3	5
Arhgap42	1323	2357	1997	2487	2273	2714	2096	2278	2442	3297	2512	2608
Arhgap44	740	1127	808	1556	1224	1421	1443	1297	1549	1819	1695	1546
Arhgap45	802	1994	548	347	400	1040	316	501	1029	749	680	729
Arhgap5	10578	3699	6589	6501	6913	7016	6912	7138	7382	8330	6453	6713
Arhgap6	1203	2075	1374	2207	1761	2980	2032	1868	2136	2050	2555	2040
Arhgap8	70	166	108	122	154	265	168	57	50	135	121	227
Arhgap9	286	264	199	150	103	306	143	238	248	217	162	214
Arhgdia	13079	10538	10447	15818	16121	17419	18495	16511	17745	20758	19157	18918
Arhgdib	1855	892	1016	1467	1270	1992	1568	1556	2119	1920	1526	1712
Arhgef1	4117	4263	3896	3946	4321	4934	4443	4915	4692	4877	4517	5053
Arhgef10	4146	7058	5136	7312	5887	7666	6087	6141	7375	6993	7558	8179
Arhgef10l	2788	7386	4193	7353	5401	7345	6395	5763	5307	5533	7673	7405
Arhgef11	6462	5871	5471	5862	5849	6535	6181	6537	7020	7562	6788	7300
Arhgef12	16083	11532	13205	11669	12945	14498	12665	14122	13336	14025	13170	14697
Arhgef15	2046	1110	1776	945	2011	1666	1439	1868	1564	1778	1313	1316
Arhgef16	48	125	76	45	30	61	98	97	361	243	176	153
Arhgef18	5321	2352	3003	2146	2995	2913	2687	2933	2765	2787	2595	2902
Arhgef19	102	137	141	78	142	96	151	132	424	412	188	281
Arhgef2	7809	14823	8865	12059	10684	14910	11518	10758	9683	10590	11595	12968
Arhgef25	2289	4466	2746	5229	4010	5449	5148	4532	4488	4940	5597	6308
Arhgef26	332	585	441	315	337	441	532	391	1185	1098	954	846
Arhgef28	3444	1940	1983	1347	1988	1350	1516	1863	3354	4351	2005	1994
Arhgef3	1923	1597	1460	1038	1167	1850	1235	1597	2773	2933	1640	1700
Arhgef33	36	24	15	11	7	18	25	20	49	46	20	27
Arhgef37	6146	497	2777	410	2143	854	1235	2067	1017	977	787	990
Arhgef38	0	1	0	2	0	1	0	0	2	0	2	1
Arhgef39	34	72	46	43	53	62	70	65	61	37	80	116
Arhgef4	1766	1487	1790	2195	1979	2139	2123	2261	2990	3292	2834	2445
Arhgef40	3911	4726	4414	3736	3880	4746	4241	4844	5030	5149	4817	5251
Arhgef5	2345	2839	2151	3115	2916	3814	3030	2417	2150	2797	3396	3536
Arhgef6	1831	1598	1543	2069	1650	2284	2097	2051	2298	2409	2354	2688
Arhgef7	4212	4624	4406	5360	5286	6663	5303	5133	5775	6294	7947	7146
Arhgef9	441	550	469	505	502	699	737	551	1588	1966	1055	710
Arid1a	8499	8555	9098	9163	10543	10786	9396	9432	9584	10653	9539	10696
Arid1b	5408	4305	4877	5295	5754	5733	5133	5517	5383	5899	5504	5976
Arid2	6355	5937	6232	6292	6731	6932	6531	6779	6597	7376	6616	7137
Arid3a	444	515	413	339	353	513	460	451	490	489	500	485
Arid3b	405	557	512	534	657	663	578	641	617	630	628	691
Arid3c	0	3	0	0	1	0	0	1	1	0	0	0
Arid4a	1315	1089	1401	1467	1393	1588	1402	1541	1484	1731	1356	1618
Arid4b	136	210	155	254	330	276	205	330	314	185	454	273
Arid5a	2257	12622	4588	17270	9223	6433	4574	5215	4032	6693	6839	11599
Arid5b	3031	5308	4105	8845	6781	6636	6527	5843	4502	5986	5597	7779
Arih1	8608	5926	7323	8595	8382	9364	9204	9254	8568	9549	9149	9182
Arih2	3134	2075	2406	2532	2683	2632	2577	2838	2657	2734	2647	2933
Arih2os	16	14	4	14	10	11	10	8	10	6	12	10
Arl1	3054	1543	2151	3704	3373	3299	3699	3755	3133	3760	3286	4037
Arl10	270	431	334	573	376	591	563	427	658	804	779	620
Arl11	215	27	139	106	124	197	153	191	202	227	92	175
Arl13a	65	62	106	43	42	102	42	76	84	79	31	61
Arl13b	1064	2138	1701	1803	1603	2221	1617	1873	1939	2239	2005	2309
Arl14ep	2376	1231	1749	1549	1875	2038	1835	1890	1899	2171	1754	1948
Arl14epl	0	0	0	0	0	0	0	0	1	0	0	0
Arl15	1653	821	1385	979	1592	1371	1305	1384	1476	1638	1253	1208
Arl16	553	201	380	329	395	385	408	434	371	449	386	399
Arl2	729	529	567	641	755	729	842	853	885	933	890	794
Arl2bp	6630	2448	3570	4286	4410	4023	4844	4441	4458	5030	4576	4764
Arl3	400	254	315	472	476	460	526	547	468	557	524	481
Arl4a	3597	3575	3536	4489	4295	5705	5477	4733	3759	4498	4659	5139
Arl4c	458	183	220	229	298	206	180	224	328	548	345	244
Arl4d	698	493	671	1009	888	797	486	775	752	1267	549	785
Arl5a	8071	6813	6089	8737	8660	10080	9635	8745	8117	10214	8837	9063
Arl5b	4882	2515	4473	4009	5560	4510	3601	4062	3245	4260	2966	4262
Arl5c	26	35	32	27	22	35	7	11	71	20	29	18
Arl6	439	343	382	481	439	561	556	508	623	680	610	575
Arl6ip1	4997	2168	3056	2750	3130	3181	3350	3768	4545	5220	3751	3637
Arl6ip4	1105	430	624	492	645	637	669	635	698	677	621	595
Arl6ip5	1607	1129	933	1488	1448	1686	1653	1756	1487	2139	1653	1760
Arl6ip6	1330	501	889	570	889	814	806	921	621	825	703	769
Arl8a	2395	2240	1970	2844	2660	2881	3184	2919	4147	4856	3915	3310
Arl8b	8110	4080	5517	6171	6451	6771	6959	7217	8128	9356	7269	6940
Arl9	1	2	0	4	2	0	2	1	5	2	1	0
Armc1	2791	1273	1888	2397	2209	2410	2465	2465	2293	2523	2453	2355
Armc10	1233	1006	1172	1473	1205	1835	1439	1474	1361	1593	1493	1689
Armc12	0	0	0	0	0	2	1	1	0	1	0	0
Armc2	59	41	82	44	40	85	49	54	66	96	67	77
Armc3	15	20	8	24	7	32	24	11	18	29	30	24
Armc4	0	1	0	0	0	0	0	0	1	0	0	1
Armc5	2038	1869	2043	2069	2293	2221	2406	2577	2240	2534	2257	2580
Armc6	258	197	195	195	239	228	211	218	260	288	248	247
Armc7	543	792	507	456	559	858	683	716	672	828	675	791
Armc8	2395	1844	2177	2374	2382	2588	2464	2388	2421	2658	2601	2667
Armc9	985	1686	1039	1584	1298	1911	1491	1383	1395	1678	1585	1684
Armcx1	3	1	3	3	0	1	1	5	2	4	4	1
Armcx2	962	1632	1484	2633	1937	2610	2393	1986	2375	3234	2719	2707
Armcx3	1365	1645	1406	2946	2286	2618	2541	2365	2649	3170	2760	2973
Armcx4	1673	2577	2140	3281	2796	4804	3161	2578	2438	3441	3128	3910
Armcx6	99	176	112	228	180	255	219	198	238	278	254	258
Armt1	1195	513	833	564	751	602	766	853	771	758	643	652
Arnt	4176	2475	3703	3525	4328	3638	4608	4684	3785	4700	3439	4707
Arnt2	217	407	204	361	309	622	224	210	934	1280	580	372
Arntl	302	360	397	224	287	471	194	189	497	520	347	212
Arntl2	48	145	36	86	74	118	57	72	34	69	60	86
Arpc1a	3387	2240	2532	2113	2742	2746	2780	2875	3276	3535	2864	3060
Arpc1b	5337	5092	4637	5752	6332	8657	6344	5765	5988	7156	6809	7439
Arpc2	11551	8486	7762	13742	14186	13518	13531	12347	10346	12882	12119	14162
Arpc3	3021	1612	1660	2930	3398	2902	3428	3384	3232	4147	3301	3541
Arpc4	5223	3384	4067	5462	5279	5989	5418	5220	4953	5845	5628	5794
Arpc5	3920	2117	2841	3248	3358	4106	3466	3738	3647	4548	3643	3705
Arpc5l	1107	668	961	694	1121	910	944	812	774	954	739	597
Arpin	703	413	655	661	790	846	955	840	777	847	921	917
Arpp19	9191	4400	6074	8828	7984	8610	9464	9119	9042	10233	9613	9391
Arpp21	78	84	75	46	184	84	56	30	93	232	67	59
Arr3	105	356	197	189	225	290	189	263	312	280	259	300
Arrb1	6568	6726	7325	5780	6317	9871	6644	7360	8460	9837	8104	8331
Arrb2	506	595	358	327	348	539	430	426	562	617	378	483
Arrdc1	554	540	494	491	569	762	730	711	672	870	677	692
Arrdc2	438	386	333	284	247	482	481	447	488	433	468	467
Arrdc3	10683	5813	7646	8281	6607	12166	14573	11526	10393	10968	11704	12274
Arrdc4	1055	408	841	682	904	1327	908	591	812	1118	641	1033
Arrdc5	1	2	3	5	6	2	0	0	0	1	2	2
Arsa	5115	2347	3063	2263	3532	3116	3020	3230	2672	3020	2519	3388
Arsb	2934	1352	2027	2452	2418	2387	2383	2661	2256	3011	2240	2742
Arse	1543	1377	1406	1491	1903	1468	1880	1841	1377	1467	1502	1992
Arsg	1124	803	959	854	859	1142	854	1007	902	945	797	898
Arsi	260	299	261	284	353	530	178	175	221	327	184	210
Arsj	271	310	285	431	273	422	366	420	411	471	545	467
Arsk	718	395	621	619	592	632	651	635	664	788	682	677
Art1	1	2	0	0	0	1	0	0	6	0	0	0
Art2b	36	27	15	11	4	33	4	10	41	6	29	9
Art3	3705	1396	3476	1111	2714	1090	2893	3255	5461	5174	2537	3098
Art4	39	100	36	32	24	101	46	44	167	136	101	79
Art5	0	0	1	0	0	5	0	0	1	0	0	0
Artn	43	128	109	78	70	106	74	97	129	184	73	138
Arv1	411	259	300	278	296	263	298	309	378	350	277	331
Arvcf	1322	1667	1047	1995	1304	1932	1804	1919	2303	3315	2203	2345
Arx	8	1	2	0	5	0	2	6	0	1	6	2
Arxes2	232	44	218	39	94	68	101	160	104	187	47	105
As3mt	2333	1146	1650	1293	1630	1382	1503	1585	1471	1360	1297	1581
Asah1	6939	4125	5141	8186	6805	8130	8038	7896	7305	8437	8127	8859
Asah2	1443	804	1095	1610	1383	1578	1565	1414	1486	1432	1439	1569
Asap1	2227	2512	2020	1730	1870	2291	1775	2060	2521	2946	1954	2175
Asap2	3108	3616	2744	2801	3390	3784	3122	2953	4374	5007	3957	3926
Asap3	962	983	1141	951	1009	1205	1020	1168	1326	1407	1166	1395
Asb1	1168	1309	1129	1286	1296	1592	1360	1259	2890	3219	2307	1569
Asb10	12	5	3	5	9	0	7	8	15	4	3	6
Asb11	3	45	8	6	15	6	17	4	15	8	25	12
Asb12	13	49	60	129	44	142	118	99	89	68	98	97
Asb13	750	512	681	565	740	809	709	801	734	766	698	706
Asb14	64	100	103	68	77	103	74	89	102	95	65	109
Asb15	5	30	10	5	2	9	5	3	4	13	12	8
Asb16	0	0	1	0	4	4	0	1	4	2	0	2
Asb17	0	0	0	0	0	1	0	0	0	0	0	0
Asb18	0	1	6	1	4	1	5	1	11	10	15	11
Asb2	2069	4549	2799	5425	3594	4467	3661	4639	3811	3311	4368	4283
Asb3	1105	793	1036	908	888	1068	1081	1154	1080	1196	1034	1176
Asb4	162	44	203	180	154	307	274	195	348	219	439	295
Asb5	42	126	50	70	56	95	56	79	81	120	95	79
Asb6	689	581	500	651	678	716	790	706	708	733	823	742
Asb7	510	480	464	452	446	585	509	523	564	637	575	596
Asb8	5715	1334	3588	1395	3159	1854	2696	3057	2753	2802	1961	2379
Asb9	0	0	0	0	0	0	1	0	2	2	1	2
Ascc1	903	610	777	749	794	854	912	916	919	1059	953	1027
Ascc2	1143	1143	950	1271	1346	1361	1242	1022	1099	1227	1256	1423
Ascc3	5171	4899	5244	4855	5334	5878	5010	5791	5253	6369	5053	5212
Ascl1	1	4	6	1	9	9	6	0	4	10	4	2
Ascl2	6	33	19	29	8	23	17	12	24	18	8	28
Ascl3	2	1	2	5	4	1	1	3	4	0	5	2
Ascl4	3	7	4	6	3	1	2	3	12	7	9	6
Ascl5	0	0	0	0	0	0	1	0	0	0	0	0
Asf1a	1457	981	1241	1292	1299	1494	1404	1397	1617	1668	1456	1525
Asf1b	43	9	58	15	22	27	29	43	41	20	24	56
Asgr1	2	2	1	5	0	11	1	1	16	1	3	2
Asgr2	362	106	286	163	233	323	208	287	312	418	124	251
Ash1l	15910	14409	16796	21158	20936	23372	21398	20895	20979	22817	21980	23749
Ash2l	2305	1516	1851	2207	2165	2299	2665	2910	2634	2965	2555	2599
Asic1	118	54	100	64	100	58	83	96	152	200	126	88
Asic2	9	247	63	171	115	118	149	101	439	473	400	216
Asic3	156	96	126	108	122	106	130	134	172	207	194	165
Asic4	59	121	51	114	83	52	75	86	76	68	100	103
Asic5	4	1	4	0	0	0	1	0	7	13	2	9
Asip	3	2	3	14	6	22	2	2	7	2	2	5
Asl	1035	882	1124	948	1132	1073	1205	1229	1193	1247	1067	1301
Asmt	54	136	62	108	107	101	76	100	57	83	121	117
Asmtl	892	449	605	627	758	701	763	789	718	726	757	878
Asna1	2509	885	1579	1367	1734	1400	1929	1803	1590	1916	1616	1648
Asns	5855	830	3955	380	3679	765	2396	3394	2826	2888	910	1584
Asnsd1	1506	794	1226	1194	1226	1296	1456	1518	1625	1892	1524	1391
Aspa	6981	1110	3516	1209	2834	1258	2305	3090	2466	2482	1288	1900
Aspdh	3	12	1	2	12	2	14	4	53	41	14	13
Aspg	4167	31	846	3	243	18	158	614	92	21	58	46
Asph	4511	5474	3901	8639	7351	8513	7414	5845	4990	6395	6814	8320
Asphd1	1	19	5	3	6	7	8	2	32	36	49	12
Asphd2	1	15	0	1	0	1	1	3	92	123	47	3
Aspm	354	237	206	87	271	223	254	200	164	169	224	383
Aspn	101	96	76	244	284	319	648	386	307	230	442	343
Aspnl1	33	33	392	104	102	109	195	164	82	81	118	135
Asprv1	0	1	0	0	0	0	0	0	0	0	0	0
Aspscr1	1236	1026	1007	1130	1217	1254	1340	1437	1481	1412	1302	1432
Asrgl1	340	322	544	326	420	397	462	646	773	705	472	497
Ass1	156	477	104	211	278	322	324	196	859	839	635	334
Aste1	174	233	238	194	204	254	217	212	255	242	257	202
Astl	0	0	0	1	0	0	0	0	0	0	0	0
Astn1	161	732	139	71	44	307	93	176	1586	2429	945	132
Astn2	254	773	463	600	663	647	644	649	788	1141	494	681
Asun	2070	1562	1908	1645	1863	1741	2030	2009	1747	2130	1758	2083
Asxl1	3394	4915	4337	4677	4307	5586	4352	5043	5041	5804	4960	5705
Asxl2	3921	2661	3558	3592	3836	4253	3932	4058	4068	4432	4118	4439
Asz1	0	1	0	0	0	0	0	0	1	0	0	0
Atad1	6532	2435	4205	4117	4898	4305	4777	5086	4836	5465	4856	4721
Atad2	1206	1372	1453	1625	1563	1716	1877	1788	1382	1974	1820	2212
Atad2b	897	1009	990	825	892	1101	882	951	892	1089	913	1035
Atad3a	2698	655	1651	601	1878	804	1364	1439	1214	1172	851	931
Atad5	419	235	312	293	344	356	347	315	392	390	341	387
Atat1	498	585	447	532	590	605	606	609	696	730	680	728
Atcay	6	159	5	5	0	22	19	41	785	1048	539	44
Ate1	2068	2252	1773	2901	2852	3019	2561	2977	2410	3067	2895	3114
Atf1	1787	1350	1700	2259	2097	2459	2238	2150	1994	2265	2136	2192
Atf2	4745	1800	2817	2299	3111	2435	2480	2828	2392	2667	2446	2491
Atf3	1781	6728	6597	37105	14095	4874	1467	2456	1906	5728	2715	11278
Atf4	6810	6024	6194	10821	9828	7871	7012	7121	6387	7822	7006	9229
Atf5	8063	3960	8974	9302	10357	11003	11568	8339	9165	9073	10425	11528
Atf6	7568	4482	6578	7562	7579	8384	7729	8266	7782	8373	7849	8595
Atf6b	2614	2744	2402	3253	3110	3702	3498	3219	3060	3718	3692	3871
Atf7	10553	7421	10177	9417	10915	10704	10054	11813	9932	11874	9919	11379
Atf7ip	8121	5829	7115	6853	7039	9236	7659	7840	8005	9312	7227	9044
Atf7ip2	1	1	1	0	0	0	0	5	12	6	0	0
Atg10	562	352	474	305	411	410	367	484	442	487	294	409
Atg101	610	454	456	541	552	535	585	641	645	665	716	687
Atg12	1609	1456	1578	1547	1397	1956	1631	1757	1919	2135	1835	1880
Atg13	4508	4143	4081	6507	4654	6357	6137	5522	5349	5150	6911	7356
Atg14	1063	940	857	897	845	1227	1068	1103	1113	1226	992	1289
Atg16l1	1667	1948	1745	2001	1996	2362	2218	2225	2143	2435	2583	2567
Atg16l2	405	1271	621	890	661	1006	915	790	878	785	1093	1106
Atg2a	4575	3193	3628	2998	3728	3367	3710	3884	3727	3946	3685	4244
Atg3	2256	1442	1877	2320	2338	2438	2596	2504	2319	2853	2262	2368
Atg4a	965	837	800	857	925	1038	1061	956	1077	1122	1051	1075
Atg4b	2176	1656	1763	1943	1897	1910	2187	2259	2162	2418	2317	2220
Atg4c	1182	503	771	550	715	572	687	715	765	740	674	697
Atg4d	1647	715	970	686	978	828	791	926	806	852	842	921
Atg5	1207	671	960	983	1041	1151	1155	1125	1170	1256	1144	1276
Atg7	1123	1506	1214	1249	1139	1718	1385	1380	1309	1525	1550	1696
Atg9a	3599	2741	3033	3273	3606	3006	3757	3947	3771	4128	3589	4073
Atg9b	74	33	54	55	88	78	63	59	59	69	80	57
Atic	1414	848	1123	1538	1417	1334	1451	1694	1654	1918	1758	1636
Atl1	211	604	260	295	233	358	396	370	1705	1972	1093	512
Atl2	5025	1754	3529	2335	3190	2363	2527	3470	2595	2530	2340	2572
Atl3	16449	9663	13494	16295	15331	17415	17261	17341	15536	17244	16398	18200
Atm	5021	4908	5130	5166	5135	6903	5273	5064	6321	6147	5299	6143
Atmin	1259	703	930	754	921	903	994	1020	1195	1352	1052	947
Atn1	28	54	39	24	67	52	55	112	379	58	32	58
Atoh1	0	2	3	0	0	2	0	1	0	0	1	1
Atoh7	0	1	0	0	0	0	0	0	0	0	0	0
Atoh8	969	747	895	969	702	966	1019	1387	1040	1232	1607	1350
Atox1	1386	1160	1017	1143	1146	1353	1245	1337	1344	1500	1220	1376
Atp10a	1987	4551	2892	5335	4851	6170	4601	3375	3159	4157	4547	5610
Atp10b	16	100	41	3	9	9	51	17	354	347	164	179
Atp10d	4942	3378	4000	3011	4258	4383	3020	3635	3611	4256	2962	3375
Atp11a	3919	3079	3485	3282	3583	4112	3766	3615	4339	4691	3800	4130
Atp11b	3596	2186	2828	2884	2791	3225	2909	3124	2733	3320	2933	3192
Atp11c	2288	1876	2461	2331	2288	3232	2574	2719	2729	3364	2742	2672
Atp12a	0	0	1	0	0	5	0	1	0	0	0	0
Atp13a1	2685	2528	2335	2249	2779	2544	2874	2785	2698	2781	2978	3095
Atp13a2	6488	2061	3231	1482	3001	1699	2255	2730	3309	3615	2532	2099
Atp13a3	897	389	614	423	553	535	487	592	571	636	559	561
Atp13a4	0	0	1	0	0	0	0	0	0	0	0	0
Atp13a5	3	32	2	0	2	12	13	29	6	5	3	8
Atp1a1	18372	11748	8409	8248	10839	11866	9895	9407	21806	28015	18085	10635
Atp1a2	113663	11775	60830	10405	44318	12313	31094	45716	30389	28431	19468	24312
Atp1a3	54	446	36	25	18	124	56	111	1337	2233	783	71
Atp1a4	7	44	15	20	31	30	14	28	33	23	9	34
Atp1b1	3671	1643	805	779	830	1119	835	1111	5588	7867	3782	889
Atp1b2	2645	3114	3320	5011	3926	4225	5232	4375	4738	4813	7050	5039
Atp1b3	16170	3416	7522	6384	8693	6531	7348	7882	6749	7428	6743	7200
Atp1b4	26	38	39	16	17	49	22	22	26	37	29	30
Atp23	327	186	244	227	272	262	318	335	188	256	244	328
Atp2a1	136	91	89	154	107	129	358	144	2419	144	140	174
Atp2a2	42753	30885	33829	52201	41400	45791	41181	43309	36982	39045	47077	48360
Atp2a3	3377	8728	4001	5154	5893	8006	6046	4349	4802	4737	5878	6070
Atp2b1	4852	4868	4840	6618	5893	7934	6739	6186	7377	8470	7816	7413
Atp2b2	48	339	19	14	47	48	83	78	1323	1656	909	105
Atp2b3	40	267	29	70	23	44	69	86	998	1136	537	67
Atp2b4	14883	32508	24562	49428	36539	43989	40823	37686	41570	41881	49153	47027
Atp2c1	4901	4143	4479	3982	4410	4933	4788	5141	6152	7076	5501	4827
Atp2c2	9	48	4	11	5	5	4	3	9	12	18	13
Atp4a	10	6	15	7	7	11	12	11	14	19	10	21
Atp4b	71	0	9	6	12	4	6	2	8	11	1	5
Atp5a1	111434	9610	51192	17438	42667	17579	31993	40716	27323	26701	19560	25523
Atp5b	211818	18044	97748	30265	78219	30640	58150	79614	50478	52318	34050	46965
Atp5c1	15097	1862	7752	3145	6887	3184	5490	7347	4934	4995	3459	4188
Atp5d	14582	2366	7835	3302	8532	3644	6270	7054	4895	5332	3968	4784
Atp5e	11365	1147	4737	1795	4357	2064	3692	4775	2803	2839	2060	2452
Atp5f1	281	344	116	41	438	52	175	302	86	151	68	122
Atp5g1	969	1001	993	1986	1725	1837	2275	1989	2133	2308	2185	2235
Atp5g2	5862	2289	3967	3935	5044	4055	5179	5578	4399	4948	4189	4620
Atp5g3	3174	1736	3681	3625	4240	3277	4801	4768	5604	5604	3766	4378
Atp5h	8076	1001	4037	1899	4013	1756	2944	3675	2541	2673	1819	2078
Atp5i	2306	273	970	482	1157	487	762	960	794	696	483	505
Atp5j	1404	510	1020	1057	1331	932	1160	1318	1339	1293	1035	1067
Atp5j2	8628	672	3156	1352	3478	1335	2504	3579	1838	2013	1385	1721
Atp5l	27051	2378	12048	4759	11706	4443	8842	12749	6860	7776	5229	6851
Atp5o	16731	2126	8997	3669	8572	3891	6454	8642	5684	5990	4254	4981
Atp5s	796	167	519	309	469	340	408	469	518	475	281	397
Atp5sl	2285	788	1382	1016	1366	1314	1427	1512	1331	1380	1053	1365
Atp6ap1	9987	5516	6870	10398	10053	10666	11351	10759	10272	12706	11041	11968
Atp6ap1l	15	1	4	10	8	3	2	16	5	6	21	10
Atp6ap2	2024	1767	1345	2728	2424	2483	2626	2116	2929	3613	2960	2805
Atp6v0a1	5835	5485	5405	5284	5652	6670	6216	6316	8882	11053	7282	6741
Atp6v0a2	1923	1133	1297	1335	1748	1767	1774	1794	1795	1923	1888	1872
Atp6v0a4	211	41	90	19	84	46	48	58	77	69	70	37
Atp6v0b	2048	869	1362	1135	1475	1387	1611	1622	1711	1908	1561	1433
Atp6v0c	8035	4561	5501	6379	7308	6321	7311	6982	8516	10364	8334	7364
Atp6v0d1	5731	3611	3977	5511	5315	5548	5970	5735	6539	7816	6180	6026
Atp6v0d2	4	6	1	6	4	20	17	2	10	4	1	6
Atp6v0e1	5864	2561	3071	3791	4256	3972	4667	4627	3785	4582	3955	4460
Atp6v0e2	1005	877	929	1081	1184	1399	1497	1279	2038	2298	1617	1450
Atp6v1a	10212	4003	6150	6181	6908	6160	7027	7193	8490	9410	7585	6989
Atp6v1b1	11	61	22	29	8	77	37	43	42	39	46	37
Atp6v1b2	4359	2717	2615	1734	2490	2156	2416	2830	8753	8686	6403	2390
Atp6v1c1	3243	2039	2154	2635	2528	2752	2773	2893	2984	3634	2858	2943
Atp6v1c2	139	81	170	109	135	117	99	182	194	215	96	127
Atp6v1d	4369	1149	2036	1947	2436	2075	2394	2681	2401	2700	2231	2199
Atp6v1e1	3783	1424	1984	2266	2445	2323	2668	2615	3189	3611	2820	2551
Atp6v1e2	65	92	122	168	149	161	135	161	58	139	109	129
Atp6v1f	1439	747	882	1020	1314	1132	1435	1384	1263	1638	1235	1247
Atp6v1g1	3173	1510	2035	2792	2945	2653	3180	3133	2934	3465	3019	2957
Atp6v1g2	35	175	29	24	23	36	63	47	505	734	340	38
Atp6v1g3	0	0	0	1	0	0	0	0	2	0	0	0
Atp6v1h	3449	1886	2194	2215	2540	2472	2472	2616	2840	3415	2596	2484
Atp7a	2431	2936	2528	3500	2819	4060	3246	3315	6345	7833	5234	3514
Atp7b	153	80	257	34	142	146	122	189	193	265	66	118
Atp8a1	2042	7093	1829	766	1597	2024	1388	1789	5648	7223	3419	1765
Atp8a2	107	590	106	21	23	43	136	124	2431	2269	1456	237
Atp8b1	1357	1968	1829	2852	2583	3353	2989	2672	2554	3458	2764	3286
Atp8b2	7019	4497	5511	6633	7346	7084	7375	7330	7101	8326	7193	7685
Atp8b3	178	677	251	672	476	690	618	612	435	563	734	828
Atp8b4	279	254	211	104	125	312	96	166	155	181	143	159
Atp8b5p	113	280	231	284	148	347	159	224	238	195	161	309
Atp9a	1805	1821	2430	769	1910	1267	2139	2260	5624	5730	2869	1956
Atp9b	4245	3494	3513	3306	3687	4186	3539	3883	4037	4464	3629	4086
Atpaf1	2967	843	1662	928	1497	1320	1231	1440	1354	1311	1231	1217
Atpaf2	2204	741	1328	725	1305	935	1101	1331	996	851	836	1079
Atpif1	296	443	235	272	237	373	276	322	373	399	408	268
Atr	1560	1505	1590	1465	1519	2002	1736	1732	2034	2039	1800	1868
Atraid	1454	550	855	891	960	1052	1211	1146	1177	1061	846	1169
Atrip	184	262	193	210	220	298	214	268	290	313	281	301
Atrn	10508	6380	8196	8698	9186	10108	9135	9479	9238	9987	9313	10015
Atrnl1	14378	6714	12633	9109	11660	10658	9875	11673	10681	12713	8694	9978
Atrx	5909	4607	5477	6735	5964	7779	7057	6840	7015	7406	7238	7250
Atxn1	1977	2677	2192	2835	2732	3176	3070	2511	2538	2804	3095	3405
Atxn10	4242	2414	3122	3598	3351	3943	4073	3940	4493	5530	4155	3966
Atxn2	7616	3817	5482	3977	6499	4785	4400	5552	4891	5087	4515	5064
Atxn2l	4849	5263	5232	5534	6165	5620	6209	6097	5928	6436	5798	6710
Atxn3	1684	1810	1690	1582	1832	2296	1796	2202	2317	2600	1974	2079
Atxn7	2622	1966	2486	3113	3310	3182	2779	2900	2742	3089	2958	3118
Atxn7l1	1837	2217	2023	1957	2099	2373	2132	2117	2664	2811	2100	2448
Atxn7l2	158	225	181	199	217	228	217	199	271	240	248	252
Atxn7l3	3073	2970	2701	3493	3279	3468	3615	3347	3778	4007	3769	3923
Atxn7l3b	4944	3039	4050	4475	4372	5377	5247	4984	5740	6332	5089	5339
Auh	3354	1154	2175	614	1774	880	1380	1881	1861	1831	985	1286
Aunip	13	14	5	4	13	5	9	15	14	21	10	22
Aup1	3121	1957	2322	2160	2870	2308	2651	2912	2586	2820	2425	2789
Aurka	136	103	131	128	116	130	149	118	136	151	149	193
Aurkaip1	2095	751	1203	1194	1506	1296	1498	1391	1193	1429	1267	1380
Aurkb	89	55	39	45	54	63	65	72	23	57	77	104
Aurkc	290	355	292	205	245	275	273	331	264	238	279	260
Aven	496	394	523	546	529	596	582	562	542	574	584	678
Avil	210	314	127	215	216	226	242	378	2260	2360	994	298
Avl9	2913	2627	3012	2532	2894	3373	2894	2917	3602	4146	3099	3283
Avp	4	0	0	0	1	1	1	6	2	1	1	0
Avpi1	776	801	802	1378	1079	1345	1095	1077	960	1090	1116	1306
Avpr1a	306	1183	754	1757	1402	1795	1937	1034	1045	1068	2197	1730
Avpr1b	8	0	4	0	2	0	4	0	1	1	0	0
Avpr2	28	67	30	24	20	45	10	40	47	43	33	28
Awat1	0	0	0	0	0	0	0	0	0	0	0	0
Awat2	18	21	8	7	17	20	28	5	39	36	46	32
Axdnd1	10	28	7	17	8	19	8	10	10	10	6	14
Axin2	491	358	349	380	357	399	403	543	631	612	459	506
Axl	8467	12358	9271	16522	13586	21276	15787	14815	12696	17311	17298	21235
Azgp1	1	10	5	1	3	23	4	1	28	17	10	20
Azi2	1837	1273	1549	1853	1971	1856	1823	1727	1708	1826	1793	1909
Azin1	3933	4201	3921	5406	5542	4858	4699	4336	5287	6268	4955	5235
Azin2	393	431	594	390	448	456	505	627	869	893	553	530
B2m	22215	20590	16782	20641	25254	24021	25251	24353	21799	25081	21071	25172
B3galnt1	1205	1790	1443	2459	1692	2951	2534	2498	2246	2515	2731	2738
B3galnt2	2963	2484	2483	3920	3751	3892	3239	3370	2833	3622	3622	3792
B3galt1	153	683	791	216	479	649	415	717	1274	2218	628	367
B3galt2	184	517	404	274	306	530	208	304	418	457	327	356
B3galt4	110	129	89	110	96	108	181	155	175	172	162	167
B3galt5	4	23	0	3	1	3	17	2	155	111	46	33
B3galt6	421	265	395	334	322	400	448	393	503	486	480	448
B3gat1	0	0	2	0	0	0	3	2	16	6	1	2
B3gat2	92	41	47	66	49	44	43	77	44	52	31	41
B3gat3	2351	1562	1476	1396	1696	1601	1600	1647	2096	2320	1973	1565
B3glct	3517	2204	2695	3665	3399	3925	3528	3227	2913	3098	3582	3935
B3gnt2	1955	2797	2438	4355	3061	3408	2944	2829	3243	3487	3160	3393
B3gnt3	7	12	1	1	3	2	0	0	2	2	3	2
B3gnt4	326	8	56	2	67	5	15	27	6	4	6	8
B3gnt5	9	51	22	3	4	31	24	16	152	72	68	57
B3gnt6	15	28	28	1	4	5	6	48	16	27	12	7
B3gnt7	236	153	185	203	112	622	147	239	267	316	142	182
B3gnt8	192	168	193	167	159	261	233	306	329	396	233	263
B3gnt9	1147	1311	1216	1812	1856	2261	1927	1659	1303	1847	1683	2266
B3gntl1	984	1883	1358	1154	1202	1507	1149	1401	1452	1544	1271	1694
B4galnt1	36	66	18	14	16	48	23	12	228	183	99	28
B4galnt2	93	36	82	27	61	43	44	54	99	65	64	37
B4galnt3	12	39	19	48	40	86	39	36	15	37	31	71
B4galnt4	11	67	5	13	6	10	31	17	229	287	123	34
B4galt1	2348	2437	2229	3870	3132	4264	3059	3037	2299	2965	3075	3336
B4galt2	388	527	504	864	676	890	833	747	684	934	756	947
B4galt3	952	912	903	1234	1165	1220	1092	947	998	1187	1099	1213
B4galt4	621	518	687	1091	837	1199	1134	1019	883	1070	1033	1138
B4galt5	1373	1290	1155	2040	1770	2311	1721	1756	1342	1805	2094	2028
B4galt6	1366	914	899	1119	1060	1643	1162	935	1810	2370	1946	1503
B4galt7	566	616	569	558	585	736	776	698	725	762	800	836
B4gat1	11	13	3	13	23	9	28	27	29	28	19	32
B9d1	0	2	0	0	0	2	0	4	0	2	0	0
B9d2	220	299	226	297	317	398	349	327	330	380	428	408
Baalc	58	48	23	2	6	27	21	25	195	227	130	28
Baat	0	6	13	1	2	11	9	14	7	10	1	2
Babam1	2262	1313	1623	1678	1799	2119	2016	1981	1753	2102	1815	1960
Bace1	2498	3062	2886	4461	3616	4456	4311	3565	3638	4101	4489	4959
Bace2	1894	1561	1535	2519	2329	3772	2583	2363	2376	3079	2496	3261
Bach1	697	577	628	576	564	701	734	665	935	801	734	726
Bach2	257	360	356	208	229	345	211	322	474	490	315	312
Bad	625	449	508	658	607	688	631	644	775	715	836	734
Bag1	2336	669	1387	1026	1645	1350	1586	1534	1357	1452	1278	1371
Bag2	722	789	590	1334	1396	947	914	801	730	1027	730	994
Bag3	1974	3482	3337	19323	12368	5220	3718	3465	3184	5223	5549	8554
Bag4	1158	452	968	514	979	741	862	962	984	1117	818	943
Bag5	16	13	16	23	22	17	17	17	19	20	39	20
Bag6	9525	6847	7271	7262	8167	7921	8385	8110	7708	8630	7929	9275
Bahcc1	2023	1737	1958	1449	1755	1710	1550	1756	1680	1750	1491	2061
Bahd1	1456	1503	1468	1337	1473	1804	1678	1709	1857	2105	1925	1830
Baiap2	299	439	353	355	252	378	466	357	991	848	692	677
Baiap2l1	261	269	201	259	167	338	232	231	299	312	298	206
Baiap2l2	25	66	38	46	84	80	51	70	51	51	50	97
Baiap3	98	281	126	338	106	313	280	260	188	186	335	316
Bak1	1912	838	1388	1218	1782	1434	1590	1392	1290	1422	1366	1562
Bambi	532	347	294	506	456	336	320	269	261	345	322	435
Banf1	6203	1385	3420	2937	4966	2858	4292	4258	3458	3866	3271	3493
Banf2	0	1	0	0	4	2	1	0	0	0	0	0
Bank1	34	97	25	6	13	70	9	10	102	28	14	11
Banp	1393	1145	1116	1822	1893	1931	1969	1878	1675	1997	2157	2034
Bap1	5321	2176	3252	2944	3430	2787	3439	3485	3221	3787	3280	3623
Bard1	253	70	79	92	96	83	127	85	73	64	158	135
Barhl1	2	2	0	2	1	7	0	4	5	0	8	1
Barhl2	0	0	0	0	0	0	0	0	0	0	0	0
Barx1	0	0	1	0	2	0	0	0	0	0	1	7
Barx2	0	1	0	1	0	0	0	0	0	0	1	0
Basp1	62	96	26	45	55	78	51	108	484	651	369	56
Batf	21	5	0	3	4	20	7	10	11	10	14	12
Batf2	21	15	47	50	49	44	35	38	21	36	28	30
Batf3	43	17	61	29	20	52	22	35	98	102	59	40
Bax	549	656	603	758	717	885	763	777	709	785	879	916
Baz1a	941	635	777	685	1039	1005	939	972	981	1071	952	770
Baz1b	5931	4905	5659	6041	6584	6442	7516	7194	7065	7696	7751	8154
Baz2a	5906	6541	5860	6356	6733	7076	7075	7345	6769	7268	7228	7917
Baz2b	3142	3776	3729	3906	3784	4554	3497	3944	4182	4336	3918	4461
Bbc3	144	226	177	136	131	179	181	160	144	133	132	148
Bbip1	355	301	323	294	274	440	430	421	407	420	432	375
Bbof1	177	36	128	33	60	57	84	93	78	97	73	55
Bbox1	1	1	1	1	7	22	5	0	8	0	1	0
Bbs1	1021	1078	1011	1203	1274	1548	1611	1257	1291	1604	1573	1772
Bbs10	642	222	507	199	381	376	366	493	540	527	350	408
Bbs12	391	384	497	339	405	524	503	470	576	523	494	453
Bbs2	991	873	886	863	835	1039	948	1082	1176	1231	1027	1215
Bbs4	1729	2243	1593	1790	1791	2346	1897	1960	1889	2142	2179	2124
Bbs5	256	248	247	324	248	289	328	325	317	365	394	346
Bbs7	694	1029	863	1099	1010	1230	1081	1107	1223	1272	1169	1378
Bbs9	1061	1313	1162	1449	1208	1752	1414	1584	1646	1686	1652	1745
Bbx	1334	1722	1349	2027	1703	2339	2104	1681	1773	1958	2153	2320
Bcam	16155	28935	16041	32388	31497	39765	35395	26386	23455	24919	34996	42190
Bcan	10	127	39	56	9	107	56	96	204	160	122	60
Bcap29	1817	804	1190	1191	1216	1332	1290	1479	1630	1750	1295	1355
Bcap31	9660	4111	5850	2992	5985	3503	4947	6113	5484	5968	3646	4651
Bcar1	1994	2378	1826	2537	2430	2887	2198	2296	1933	2443	2198	2422
Bcar3	2045	4072	4282	5152	5146	4618	3966	4276	4202	5358	3593	5018
Bcas1	9	38	41	3	2	11	18	27	102	146	88	39
Bcas2	820	450	596	925	794	965	926	958	836	1017	968	927
Bcas3	2320	2351	2190	2021	2110	2521	2246	2396	2598	2633	2414	2704
Bcat1	1842	4004	1399	2367	2801	3102	2442	2078	9693	12307	6682	2960
Bcat2	2781	1698	3561	1867	3257	2209	2695	3951	3123	3104	2064	2581
Bccip	497	224	388	314	405	490	424	434	402	446	354	374
Bcdin3d	173	134	168	131	175	211	169	195	234	213	192	210
Bche	6445	3157	5959	6546	5316	3919	5689	6918	8000	7465	4445	6060
Bckdha	11636	1658	6256	2030	5355	2352	4292	5979	3739	4011	2215	3600
Bckdhb	9016	1056	4925	1331	3811	1463	3018	3897	2861	2779	1581	2179
Bckdk	7307	1917	5464	2691	4295	2715	4760	4610	3720	4341	3118	4036
Bcl10	1175	1070	1176	1880	1554	1798	1542	1482	1351	1668	1693	1663
Bcl11a	36	61	33	28	12	75	41	23	76	62	30	40
Bcl11b	90	62	23	15	9	75	9	27	182	36	64	33
Bcl2	649	1268	719	1223	1058	1374	1196	1012	976	1080	1439	1691
Bcl2a1	152	68	58	75	50	134	47	87	86	122	62	79
Bcl2l1	3653	5616	5549	6077	7551	8031	5747	4742	6378	5860	6763	6478
Bcl2l10	10	18	3	7	6	4	13	13	9	10	17	8
Bcl2l11	681	528	474	341	339	577	408	582	736	719	512	649
Bcl2l12	292	191	272	224	252	327	331	368	313	297	285	361
Bcl2l13	5204	1179	2879	1530	2773	1878	2028	2571	1940	2224	1649	1873
Bcl2l14	13	52	17	16	5	53	21	32	27	9	38	35
Bcl2l15	21	38	37	23	20	58	24	30	85	33	35	50
Bcl2l2	3755	3113	3283	5149	4612	5500	5426	4781	4840	5037	6013	5511
Bcl3	1258	394	629	286	460	447	299	591	387	535	643	357
Bcl6	4879	1690	2381	4116	3565	2774	2625	3070	2505	2489	2901	3399
Bcl6b	1909	347	1166	431	1561	618	508	854	762	665	551	551
Bcl7a	1741	716	1284	825	937	789	782	1095	955	1039	970	956
Bcl7b	1890	1313	1453	1599	1826	1652	1903	1803	1649	1826	1558	2025
Bcl7c	718	571	657	882	853	1036	1015	922	850	953	974	1090
Bcl9	1255	1776	1536	1547	1594	1858	1531	1786	1704	2013	1707	1942
Bcl9l	8216	9698	8681	10161	10875	11525	11321	11623	9431	9952	11475	12250
Bclaf1	8488	9084	9708	9923	10455	10776	10247	10532	10858	12379	10498	11296
Bco1	3	64	6	3	6	3	3	1	28	14	9	4
Bco2	119	27	62	46	51	73	32	99	65	55	46	49
Bcor	2214	2137	2179	2084	2160	2442	1818	2392	2540	3078	2350	2600
Bcorl1	1511	2076	1922	2499	2434	2777	2338	2331	2306	2496	2516	2967
Bcr	3045	2741	2714	2972	3021	3693	3012	3122	3784	4067	3310	3498
Bcs1l	767	303	594	339	576	389	503	521	453	455	423	470
Bdh1	65	197	64	181	169	198	134	108	184	179	149	196
Bdh2	286	173	266	391	344	378	333	388	494	340	307	402
Bdkrb1	4	7	10	10	11	22	12	14	3	16	10	1
Bdkrb2	515	371	580	610	612	822	500	728	660	1206	539	820
Bdnf	133	90	59	68	185	149	84	38	22	105	53	107
Bdp1	4332	3835	4317	5552	5585	6215	5446	5356	5570	5749	5921	5603
Bean1	563	232	333	100	308	154	215	236	468	446	233	191
Becn1	2005	1702	1711	2057	1964	2450	2181	2057	2353	2389	2587	2459
Becn2	0	0	0	0	0	0	0	0	0	0	0	0
Begain	22	94	22	10	17	23	26	37	321	386	223	49
Bend2	0	0	0	0	0	0	0	0	0	0	0	0
Bend3	954	525	902	482	844	598	566	831	710	740	666	671
Bend4	593	681	492	634	589	692	409	535	710	828	399	566
Bend5	13	52	37	77	48	87	49	67	98	73	60	67
Bend6	650	770	634	1352	1250	1365	1354	1044	1133	1283	1400	1317
Bend7	277	260	211	340	280	195	242	297	218	236	243	317
Best1	25	86	55	56	67	79	46	23	130	68	103	111
Best2	1	2	1	1	6	0	1	2	3	2	1	3
Best3	3	41	15	18	27	37	35	44	60	72	28	55
Best4	1	3	4	4	6	2	4	12	0	10	5	6
Bet1	1508	841	1091	1191	1337	1213	1415	1391	1480	1689	1195	1344
Bet1l	2549	1233	1832	1921	1955	2280	2065	2300	1735	2110	1964	2147
Bex2	7	88	3	2	3	1	25	22	313	326	181	8
Bex3	846	505	579	926	784	925	998	859	1265	1506	1193	960
Bfar	2451	1273	1890	1827	2105	2319	2297	2283	2024	2284	2030	2420
Bfsp1	60	76	61	111	62	107	96	92	143	119	167	142
Bfsp2	3	110	1	1	0	8	1	3	0	1	5	2
Bglap	16	56	26	21	17	43	18	30	27	41	27	18
Bgn	142510	195457	130358	296901	288981	308466	291799	222955	149664	222341	260913	326277
Bhlha15	13	58	21	23	27	20	22	26	47	25	32	21
Bhlha9	13	1	18	1	4	6	9	10	31	11	1	4
Bhlhb9	1279	1451	1496	1647	1709	1745	1817	1862	1839	2083	1925	1895
Bhlhe22	19	15	20	19	23	105	29	23	52	46	15	48
Bhlhe23	0	0	1	0	0	0	1	0	1	0	0	0
Bhlhe40	7295	3155	4414	3430	3850	3572	3641	5519	3489	3769	3226	4053
Bhlhe41	1170	760	1089	1948	1170	1595	1539	2106	2210	2419	1513	2341
Bhmt	1	2	7	2	1	33	2	1	16	0	1	7
Bhmt2	0	0	0	1	0	11	0	0	2	1	0	5
Bicc1	2450	2506	3413	6328	4517	8246	4711	4502	3676	5700	4116	7669
Bicd1	607	1234	799	1146	888	1540	1022	836	1419	1617	1153	1258
Bicd2	5805	5686	5363	8770	7401	8054	8321	7748	7300	7951	9165	9283
Bicdl1	134	105	27	30	49	75	38	52	218	229	145	34
Bicdl2	1	5	2	19	4	7	3	6	3	6	6	27
Bid	1662	691	934	662	1081	844	842	1026	1133	1191	784	879
Bik	19	17	36	34	15	34	39	33	76	40	51	48
Bin1	891	1201	990	1105	1092	1158	1152	1115	1658	1827	1664	1447
Bin2	220	710	104	58	49	212	91	82	190	157	134	91
Bin2a	59	417	744	166	421	468	380	1002	525	749	226	388
Bin3	776	628	664	664	657	735	803	809	902	899	704	803
Birc2	2158	1606	1968	2422	2155	2699	2406	2477	2528	2866	2508	2811
Birc3	458	643	464	518	600	687	440	481	514	522	577	557
Birc5	29	17	12	4	16	14	14	20	5	11	16	31
Birc6	24725	24167	26320	26291	25605	30422	26209	27773	29480	30824	28773	29364
Birc7	17	9	8	3	2	8	8	9	10	14	11	8
Bivm	2031	1579	1888	1984	1901	2282	2031	2346	2153	2482	2044	2170
Blcap	3157	1248	2312	1523	2486	1734	2154	2216	2294	2426	1810	2035
Bles03	2092	1182	1573	1746	1697	1909	2096	1997	1840	2228	1816	1992
Blk	12	20	8	8	11	49	7	4	17	22	14	12
Blm	479	283	426	161	322	298	230	307	441	485	289	350
Blmh	2142	1626	2012	2346	2104	2613	2427	2632	2645	2712	2633	2756
Blnk	115	39	61	55	44	98	39	42	98	53	43	77
Bloc1s1	974	481	649	748	866	806	956	931	813	826	815	884
Bloc1s2	309	203	203	182	168	209	226	268	331	363	264	238
Bloc1s3	335	172	200	214	225	259	292	306	277	266	313	266
Bloc1s4	485	288	408	451	479	443	420	479	424	481	415	509
Bloc1s5	1891	585	1108	888	1003	1020	1087	1131	963	933	995	1084
Bloc1s6	1413	636	963	873	946	1188	1132	1069	1068	1128	900	1129
Blvra	675	279	411	455	532	577	491	503	524	570	408	595
Blvrb	1994	521	1458	791	1198	869	1305	1435	1367	1402	977	1112
Blzf1	794	605	715	903	785	991	851	928	956	1151	892	1007
Bmf	1530	1227	1822	980	961	1514	976	2174	1443	2170	1070	1362
Bmi1	5024	2453	3650	3770	3930	4175	4298	4147	3909	4382	3635	3802
Bmp1	3018	4759	3672	5455	4279	5533	4999	5023	4594	5221	5591	6479
Bmp10	9	9	14	1	2	5	1	1	2	6	0	2
Bmp15	39	35	55	62	82	91	97	36	63	76	127	128
Bmp2	358	980	580	2314	1749	1032	1063	832	596	1011	1357	1710
Bmp2k	3279	2183	3094	2478	2446	3841	3028	3485	3836	4261	2765	3308
Bmp3	413	649	475	1492	1054	783	1005	831	1192	1180	558	1193
Bmp4	946	431	787	1001	980	1618	1126	1007	1018	1342	864	1295
Bmp5	231	68	172	251	226	236	146	297	442	360	314	300
Bmp6	1738	901	1682	1681	2454	1926	2795	1582	1558	1992	1601	1997
Bmp7	75	10	39	5	23	39	8	49	99	103	18	15
Bmp8a	6	4	3	19	13	9	6	21	47	31	21	6
Bmp8b	19	54	51	62	49	81	49	65	73	59	118	76
Bmper	386	294	613	813	693	501	645	648	652	609	669	605
Bmpr1a	9064	8674	9769	16973	12862	15102	14948	14452	12164	13944	14907	15521
Bmpr1b	1604	1998	1487	3627	2549	3004	3082	2988	2202	2934	3145	3313
Bmpr2	21546	16073	18643	23686	23200	29003	25810	22925	24558	27697	25655	25714
Bms1	1715	1377	1724	2224	2113	2320	2335	2382	2272	2643	2530	2567
Bmt2	648	507	478	781	654	688	654	713	675	753	837	776
Bmx	230	167	260	272	466	717	581	320	349	285	376	387
Bmyc	430	304	364	396	384	536	526	471	469	578	457	493
Bnc1	23	0	4	2	2	7	3	5	2	4	3	1
Bnc2	683	483	1154	791	768	1297	1069	868	2071	2314	1145	1579
Bnip1	584	245	496	345	430	395	519	511	468	466	406	399
Bnip2	6755	4145	5665	9063	8391	10117	9120	8418	7894	9000	9046	9466
Bnip3	8868	1753	6407	2228	4751	3099	4288	5997	5063	5578	3001	3871
Bnip3l	10323	4702	7656	6403	7606	8649	8064	8325	8714	9182	7872	7350
Bnipl	17	26	6	11	7	5	7	11	8	10	22	21
Boc	4532	5446	6342	9667	7032	11342	6667	7388	5174	7470	6052	9987
Bod1	541	486	606	704	639	789	763	776	706	816	801	830
Bod1l1	3638	3158	3667	5053	4129	5255	5008	4782	5016	5391	5327	5349
Bok	184	286	216	288	295	359	264	293	530	810	532	337
Bola1	257	83	188	204	187	199	230	289	254	260	174	236
Bola3	2349	397	1223	641	1370	664	976	985	768	751	680	881
Boll	0	0	0	0	0	0	0	0	0	1	0	0
Bop1	1363	836	910	800	1222	1049	1160	1184	1147	1325	1273	1151
Bora	169	221	169	191	177	230	178	201	292	261	240	260
Borcs5	509	770	615	621	608	967	674	733	721	949	736	825
Borcs6	646	530	584	686	660	821	871	759	780	933	838	946
Borcs7	1542	581	1216	1247	1190	1118	1374	1556	1448	1358	1179	1185
Borcs8	700	348	490	423	588	596	684	563	568	612	557	675
Bpgm	2196	1129	1746	2312	1526	3565	3099	1790	2462	2138	3664	2067
Bphl	1625	441	1139	673	1025	819	1036	1165	1087	903	800	924
Bpi	0	0	0	0	0	1	0	0	0	0	0	0
Bpifa1	153	0	18	0	23	0	1	6	4	0	0	5
Bpifa2	0	0	0	0	0	1	0	0	0	0	1	0
Bpifa2f	0	0	0	0	0	1	0	0	0	0	0	0
Bpifa3	0	0	0	0	0	0	0	0	0	0	0	0
Bpifa5	0	0	0	0	0	0	0	0	1	0	0	0
Bpifa6	1	1	1	12	0	20	7	2	1	0	22	8
Bpifb1	5	2	1	0	2	2	3	1	3	1	2	5
Bpifb2	0	0	0	0	0	0	0	0	0	0	0	0
Bpifb3	0	0	0	0	0	0	0	0	0	0	0	0
Bpifb4	20	7	1	1	2	4	4	0	1	2	3	4
Bpifb5	60	5	6	0	20	0	1	5	8	1	1	2
Bpifb6	0	0	0	0	0	0	0	0	0	0	0	0
Bpifc	0	2	0	0	0	0	0	0	1	1	2	0
Bpnt1	3818	653	1687	1048	1682	1073	1417	1671	1358	1468	1131	1326
Bptf	5236	6369	5962	7655	7062	8542	7252	7337	7740	8408	8242	8562
Braf	3307	3964	3620	4851	4273	5499	4748	4582	4766	5533	5075	5011
Brap	4257	1198	2300	1552	2349	1844	1909	2328	1804	1966	1801	1911
Brat1	981	1150	1092	1130	1086	1244	1319	1241	1330	1402	1314	1371
Brca1	122	110	79	82	106	114	88	80	105	184	159	163
Brca2	424	270	529	273	277	345	317	374	474	502	332	375
Brcc3	1689	674	1115	990	1095	1150	1072	1083	1024	1144	1069	1046
Brd1	3248	3060	3235	3999	4114	3852	3678	4057	3737	4233	3832	4453
Brd2	127	136	135	174	182	214	446	663	156	379	199	215
Brd3	3993	2804	3162	3824	3878	3882	4250	4341	3775	3958	4604	4280
Brd4	4520	4741	4486	4856	5394	5925	5189	5316	5288	6204	5786	6050
Brd7	2514	1624	2040	2408	2340	2187	2133	2282	2240	2482	2173	2299
Brd8	1642	1611	1681	1723	1895	2055	2105	2052	2117	2250	2107	2240
Brd9	1183	1144	1071	1177	1235	1321	1307	1357	1254	1309	1264	1535
Brdt	13	0	3	0	0	0	0	0	2	1	3	4
Bre	5471	1625	3279	1602	2829	1750	3216	2952	3046	2881	1861	2805
Brf1	2813	2972	2753	3234	3096	3744	3602	3728	3800	3630	3866	4064
Brf2	339	291	295	321	301	367	413	371	460	409	446	389
Bri3	2183	1871	1973	3782	3212	3343	3327	3377	2651	3283	3176	3668
Bri3bp	448	212	347	236	364	287	323	321	304	386	293	279
Bricd5	0	0	0	0	0	0	0	0	0	0	0	0
Brinp1	6	25	11	14	4	3	14	25	103	126	43	11
Brinp2	37	47	20	15	16	59	37	70	519	886	193	33
Brinp3	1	0	7	0	1	0	3	4	1	3	3	0
Brip1	164	176	183	148	182	259	150	158	172	250	187	233
Brix1	1133	584	842	1230	1174	1217	1311	1308	1353	1540	1364	1258
Brk1	2958	1258	1948	2052	2361	2529	2699	2435	2512	2535	2320	2430
Brms1	39	10	8	7	13	17	62	72	36	222	22	10
Brms1l	313	209	194	295	330	282	283	353	371	295	465	340
Brox	3973	2719	3163	3770	3544	4162	4045	3985	4062	4521	4305	4141
Brpf1	2042	1777	1923	2114	2158	2290	2095	2094	1892	2098	2329	2341
Brpf3	1041	1065	1256	1144	1334	1168	1323	1376	1435	1450	1235	1378
Brs3	1	0	1	1	0	0	2	2	1	0	2	0
Brsk1	238	945	499	1051	727	883	869	744	1155	1379	1309	1076
Brsk2	19	199	83	43	59	60	67	80	370	373	285	121
Brwd1	4954	5621	5686	5939	5669	6875	5417	6340	6106	6301	6333	6608
Brwd3	2153	1531	1714	1769	1839	1991	1473	1694	1632	1952	1654	1663
Bscl2	2587	1003	1805	1118	1721	1446	1549	1581	1645	1649	1402	1472
Bsdc1	2329	1308	1826	2167	2050	2157	2190	2340	2122	2414	2019	2325
Bsg	19853	4511	7657	7487	9755	8370	8817	10017	9064	11105	8412	9403
Bsn	653	270	170	62	240	113	144	225	1246	1619	720	138
Bsnd	0	1	1	0	0	0	0	0	0	0	0	0
Bsph1	0	0	0	0	1	0	0	0	0	0	0	0
Bsph2	0	0	0	0	0	0	0	0	0	0	0	0
Bspry	166	106	148	71	116	73	149	155	190	143	103	112
Bst1	204	142	104	162	164	322	194	198	211	205	240	212
Bst2	1148	599	839	1079	1561	1146	1262	1267	1149	1178	849	1324
Bsx	0	0	0	0	0	0	0	0	0	2	0	0
Btaf1	4321	3441	4073	4038	4586	4337	4056	4130	4024	4325	4048	4238
Btbd1	9839	3209	5709	4586	5878	5619	5436	6595	5956	6667	5369	5769
Btbd10	1560	1905	1667	2006	1758	2369	1767	1735	1948	2239	2028	2026
Btbd11	612	1180	821	1468	876	1124	1106	1059	1664	1854	1332	1238
Btbd16	6	25	29	11	8	13	35	18	53	88	37	29
Btbd17	0	9	1	0	0	0	0	0	6	2	1	2
Btbd18	7	4	5	3	0	3	12	16	15	7	14	9
Btbd19	1391	2079	1570	2014	1803	2038	1758	1814	1391	2020	1641	1968
Btbd2	2055	1717	2117	1982	2022	2703	2336	2347	2722	2896	2562	2488
Btbd3	1139	1670	1455	1474	1265	2237	1740	1640	2855	2982	2204	2378
Btbd6	2873	1881	2156	2123	2287	2580	2460	2599	2467	2619	2551	2498
Btbd7	7269	6253	7198	10828	8742	11160	10943	9987	10347	10705	11437	11710
Btbd8	302	392	378	244	240	377	280	346	430	472	393	385
Btbd9	1564	915	1240	902	1066	1092	1052	1186	1425	1470	1088	1101
Btc	73	56	49	87	79	49	84	55	127	83	81	92
Btd	2241	1217	1675	1744	1893	1409	1784	1798	1740	2095	1812	1932
Btf3	4496	1996	3140	3539	3961	3493	3838	4083	3953	4308	3681	3923
Btf3l4	1618	486	896	761	1103	960	990	1069	1011	1042	777	966
Btg1	10635	9403	9778	11930	12325	13301	10523	10926	10827	13772	11713	12728
Btg2	15244	35726	24717	69829	34235	28727	15256	23769	14983	28774	19486	39605
Btg3	818	908	759	1075	1087	1195	1130	983	897	1189	1051	1142
Btg4	10	19	21	5	14	28	24	26	7	14	32	22
Btk	183	180	43	47	68	170	55	77	79	86	47	134
Btla	88	51	56	42	34	62	36	56	182	86	55	55
Btn1a1	0	3	1	0	0	5	1	1	0	1	2	4
Btn2a2	10	11	8	21	26	16	10	10	6	22	10	15
Btn3a2	2	1	0	0	0	0	0	0	1	1	0	2
Btnl10	27	53	51	95	45	84	85	62	79	86	98	92
Btnl2	7	0	1	1	4	4	15	1	1	0	1	2
Btnl3	5	6	1	1	0	0	1	1	2	0	1	0
Btnl5	1	0	0	0	0	0	0	0	1	2	4	0
Btnl7	0	0	0	0	0	0	0	1	0	0	0	0
Btnl8	1	0	0	0	0	1	1	2	0	0	0	1
Btnl9	1411	172	1229	164	1215	502	626	1090	485	578	227	500
Btrc	1496	1331	1467	1654	1535	1885	1596	1683	2623	3064	2020	1969
Bub1	274	175	222	259	290	261	235	312	267	268	321	357
Bub1b	106	63	50	35	78	45	49	86	38	41	47	105
Bub3	1908	825	1301	1336	1380	1499	1763	2035	1781	2166	1745	1704
Bud13	400	425	450	671	596	633	633	583	620	640	641	706
Bud31	580	291	397	570	579	507	533	526	513	569	520	530
Bves	380	591	363	868	711	787	619	666	490	592	695	748
Bysl	818	513	561	741	829	644	813	827	804	811	926	835
Bzw1	16396	5726	10966	10282	12912	10818	11801	12302	11200	12791	10517	11121
Bzw2	1240	661	1013	745	980	838	841	944	925	1042	885	830
C10H10orf95	0	0	0	0	0	0	1	2	0	0	0	0
C10H5orf58	25	170	27	26	33	68	38	28	47	37	56	48
C11H22orf29	373	294	340	322	325	449	380	376	444	523	458	455
C12H7orf61	0	0	0	0	0	0	0	0	0	0	0	0
C1H10orf76	1573	784	1090	770	1211	931	1074	1187	1191	1363	887	1062
C1H19orf84	1311	13	442	4	274	36	112	181	36	76	5	19
C1H9orf66	33	36	26	30	26	45	27	15	41	19	34	19
C1d	937	636	765	779	773	789	791	865	905	919	913	876
C1galt1	4241	6077	3029	3030	3241	4654	3673	3569	3510	4741	3618	3632
C1galt1c1	921	484	789	1039	992	1063	1072	1122	1078	1303	1066	1188
C1qa	2951	187	1070	1432	1726	2096	1911	1958	1729	2550	1126	1974
C1qb	1823	92	496	665	974	1154	1088	1299	968	1476	671	1113
C1qbp	4820	809	2742	1276	2796	1399	2284	2496	2116	2210	1533	1803
C1qc	3124	148	843	1304	1764	2075	1946	2165	1664	2794	1198	2058
C1ql1	1	5	0	1	2	2	1	0	1	8	4	1
C1ql2	1	0	0	1	0	0	0	0	0	1	0	0
C1ql3	26	124	64	59	27	91	50	54	68	85	62	83
C1ql4	6	2	5	2	17	13	8	6	3	4	3	4
C1qtnf1	1683	711	1680	1798	1430	2148	1491	1951	2161	2074	2166	1864
C1qtnf2	1573	2097	1674	3583	2442	3594	3086	2939	2110	2312	2972	3406
C1qtnf3	6	5	16	28	23	31	17	15	26	52	26	20
C1qtnf4	3	5	2	9	8	5	6	5	1	13	8	6
C1qtnf5	880	796	618	1802	1334	1400	1477	1327	1033	1270	1512	2042
C1qtnf6	522	350	453	518	426	574	554	504	466	568	534	566
C1qtnf7	1256	1638	1686	3920	2576	3794	3237	3550	2671	3021	3371	4167
C1qtnf9	1505	135	531	64	369	84	229	330	260	230	69	205
C1r	10871	6149	8254	19405	15752	23597	16093	15669	14346	17920	15765	22289
C1rl	274	289	318	290	352	436	355	310	356	326	302	353
C1s	5993	1646	4776	12228	8841	18067	8783	10088	10185	12546	8286	14512
C2	4451	1586	4471	1553	4691	2950	4917	4729	5060	5534	2037	3966
C2cd2	5006	6363	6196	9552	8152	10917	10032	7988	8141	9978	10618	10968
C2cd2l	1401	2391	1200	1681	1668	1638	1541	1577	1842	2226	1982	1726
C2cd3	1417	1261	1308	1659	1317	1573	1563	1614	1685	1907	1823	1962
C2cd4a	111	80	131	43	104	116	105	108	127	142	91	104
C2cd4b	22	14	7	4	5	34	15	3	33	55	35	14
C2cd4c	12	19	37	18	8	29	12	16	62	102	40	51
C2cd4d	98	140	133	67	103	118	153	145	139	150	191	152
C2cd5	1709	2619	1836	1614	1792	2092	1946	1966	2195	2817	1937	2331
C3	505	393	1047	332	772	1343	687	984	738	1111	604	1062
C3ar1	366	539	190	106	90	287	158	173	156	232	137	223
C4a	1145	275	1152	329	277	284	427	1246	957	1016	427	337
C4b	41450	16070	64863	14970	58072	30812	42708	53068	43976	47683	20929	31931
C4bpa	44	84	252	44	148	111	129	320	104	361	73	116
C4bpb	18	15	33	9	11	13	15	26	23	9	17	13
C5	10	6	23	5	11	25	7	20	44	15	18	13
C5ar1	556	158	216	254	245	364	291	369	316	445	241	397
C5ar2	449	124	157	107	147	361	234	203	200	216	150	184
C6	570	293	823	417	998	580	2042	1804	4813	2363	901	1152
C7	37326	12002	40437	88424	65456	102767	80465	81945	70618	110094	57858	101176
C8a	0	1	4	1	0	15	0	0	3	5	8	11
C8b	0	1	1	0	0	6	0	0	3	0	1	3
C8g	403	172	289	150	226	224	222	226	277	213	177	229
C9	1	2	12	0	0	7	1	1	5	0	20	5
CXHXorf65	43	22	39	9	52	29	28	34	36	41	30	17
Ca5a	2	0	0	0	0	2	0	1	1	1	0	1
Ca5b	5336	1584	7795	1311	5000	1439	7752	7137	11815	10290	2593	5726
Caap1	520	388	444	442	456	486	487	443	411	508	398	526
Cab39	11867	5522	8337	9650	10159	10045	10073	10258	9748	10311	9580	9807
Cab39l	2227	965	1654	1129	1399	1412	1566	1468	1853	2054	1369	1766
Cabin1	2843	4572	3234	4053	3695	4749	4463	4460	4261	4552	5228	5014
Cables1	7027	1585	3505	1405	3922	1814	2068	2805	1938	1842	1310	1876
Cables2	1300	1215	1197	1107	1405	1168	1319	1351	1321	1523	1385	1284
Cabp1	199	416	212	339	339	328	299	250	342	265	454	350
Cabp2	1	1	0	0	1	3	0	2	1	0	0	2
Cabp4	83	97	40	77	129	71	83	120	154	136	120	132
Cabp5	1	0	2	0	1	2	3	0	0	0	0	1
Cabp7	23	35	25	11	22	30	28	7	43	64	32	24
Cabs1	1	0	0	0	0	0	1	0	1	0	1	0
Cabyr	1025	865	714	656	635	621	603	803	726	656	750	641
Cacfd1	1006	803	827	1012	995	1244	1415	1137	842	1041	1246	1380
Cachd1	1856	1725	1620	1833	2142	2258	1754	1851	1882	2165	1749	1867
Cacna1a	615	496	515	331	417	511	383	373	1022	1079	612	505
Cacna1b	39	400	16	1	12	7	53	101	2041	2367	1013	53
Cacna1c	5384	15969	8467	15600	12085	17075	12102	11099	9883	11287	15569	15262
Cacna1d	995	1136	471	507	751	997	528	401	542	729	407	607
Cacna1e	37	584	118	179	246	444	216	109	475	718	316	344
Cacna1f	31	0	16	0	9	0	1	26	3	7	4	4
Cacna1g	439	1125	850	1496	970	1619	1224	1065	1044	979	1424	1525
Cacna1h	652	3299	1671	3426	2495	4023	2677	2032	2130	1971	5068	3672
Cacna1i	23	69	57	52	55	65	43	38	24	40	86	77
Cacna1s	5	7	6	4	4	4	19	11	146	5	7	11
Cacna2d1	9315	16706	11967	23640	17535	22982	20705	17374	15226	18701	21720	22372
Cacna2d2	145	273	164	284	229	259	266	236	549	621	424	286
Cacna2d3	146	213	145	83	74	268	95	137	451	488	316	133
Cacna2d4	61	23	34	9	53	18	17	13	39	25	11	25
Cacnb1	38	395	106	191	109	195	148	139	759	827	514	210
Cacnb2	1442	3042	1993	3266	2638	3355	2103	2077	1938	1950	2210	2389
Cacnb3	417	1068	507	892	682	1273	954	748	1589	1973	1258	1165
Cacnb4	587	859	1090	915	681	980	687	876	1114	1383	843	976
Cacng1	2	1	2	1	0	0	2	2	9	1	2	1
Cacng2	0	17	0	0	0	0	1	1	11	40	13	1
Cacng3	0	13	1	0	0	2	0	1	36	27	10	0
Cacng4	11	57	13	2	2	7	37	9	136	76	139	48
Cacng5	0	2	0	1	0	1	1	1	30	26	3	1
Cacng6	1	0	3	0	0	0	0	0	11	1	1	0
Cacng7	26	57	29	30	16	40	19	38	295	459	141	48
Cacng8	1	4	1	1	1	1	0	3	14	14	22	6
Cactin	904	845	883	1088	863	1046	1259	1037	1020	1012	1104	1127
Cacul1	4129	2732	3397	3876	3726	4211	3935	4081	4073	4820	4223	4225
Cacybp	2962	1120	2151	3939	4635	2094	2688	2904	2764	3343	2765	2965
Cad	12654	3145	7834	3477	7326	3578	5740	7211	5120	5623	4374	5324
Cadm1	266	259	153	104	118	155	273	253	1266	1613	590	359
Cadm2	85	505	231	66	64	115	397	151	1381	1224	865	741
Cadm3	3277	2451	2398	3631	2769	4911	4318	4158	8134	10111	5980	6201
Cadm4	56	637	213	43	47	56	343	139	1231	1075	1072	774
Cadps	475	1086	302	453	526	948	602	436	2526	3134	1695	835
Cadps2	349	351	365	286	349	590	381	438	703	616	380	351
Cage1	201	87	170	89	70	141	134	182	131	175	98	131
Calb1	77	148	77	14	56	50	45	76	368	350	199	55
Calb2	0	337	1	1	1	1	14	1	90	355	315	27
Calca	8	0	1	0	6	0	4	5	3	3	0	2
Calcb	1	1	0	0	0	4	2	0	21	1	0	3
Calcoco1	0	2	0	7	2	1	4	4	2	4	0	4
Calcoco2	0	0	0	0	0	0	0	0	0	0	0	0
Calcr	1	0	0	0	0	0	0	1	0	5	0	1
Calcrl	3484	1507	1928	1451	1728	4393	1894	2428	2700	3585	1717	2047
Cald1	40067	48379	43897	108352	87009	108756	98233	85019	75176	79648	98557	100392
Calhm1	0	0	0	0	0	1	0	1	0	0	0	0
Calhm2	1134	1377	1183	3495	3079	2679	2410	2132	1796	2336	2669	3369
Calhm3	0	2	0	0	0	1	0	0	0	0	1	0
Calm1	22468	15442	17627	26363	24395	27821	29106	24751	26980	32524	30042	28220
Calm2	7564	4294	5232	9368	8810	8916	9749	9864	10953	11623	10356	9547
Calm3	4144	2647	2996	4959	4618	5253	6017	5383	7601	8769	6223	5899
Calml3	565	1438	1587	1269	1166	1898	1537	2261	942	1660	1059	1513
Calml4	139	108	136	252	252	416	266	290	181	278	245	283
Calml5	12	4	12	1	8	0	8	13	12	21	1	8
Caln1	0	1	0	0	0	0	0	0	1	1	0	1
Calr	17811	10820	12609	20036	22071	20967	21064	19151	16760	21945	19802	21816
Calr3	583	37	333	67	246	72	118	314	85	126	77	98
Calr4	1274	15	249	16	191	10	173	223	101	124	40	101
Calu	22078	14940	17790	35221	32302	32304	33856	27429	22969	30957	30334	36323
Caly	0	79	0	4	0	5	21	16	382	446	198	7
Camk1	1916	1598	1854	2266	2472	2650	2619	2513	2003	2468	2616	2468
Camk1d	433	505	358	379	370	606	434	349	698	618	575	519
Camk1g	4	13	0	0	0	3	12	1	107	118	39	3
Camk2a	7	40	4	8	4	15	5	16	165	177	104	19
Camk2b	574	301	459	90	825	176	635	545	1863	1751	693	590
Camk2d	3624	5350	3717	5741	5164	6080	5388	5092	5637	6106	6535	5883
Camk2g	151	274	234	417	284	434	372	324	290	311	451	422
Camk2n1	318	229	222	619	353	520	455	475	513	566	505	703
Camk2n2	24	19	18	10	32	25	16	28	60	65	48	18
Camk4	75	265	54	26	38	91	50	99	1341	1518	513	43
Camkk1	856	970	718	1160	944	985	958	890	845	1092	978	1140
Camkk2	617	914	770	1285	894	1316	1179	996	1083	1032	1537	1418
Camkmt	167	225	127	214	204	262	232	216	291	380	252	277
Camkv	1	17	13	2	3	2	7	12	42	43	7	3
Camlg	631	517	618	669	732	734	789	731	765	1073	924	761
Camp	5	12	1	0	0	8	6	5	3	0	5	2
Camsap1	2722	4336	3464	5214	4206	5495	4637	4761	5142	5131	5627	5796
Camsap2	6069	4888	5958	7720	7048	8410	8102	7796	8974	10205	9380	8647
Camsap3	3849	142	1134	57	953	95	475	827	341	410	194	234
Camta1	756	1108	862	1023	869	940	1099	888	2083	2466	1500	1198
Camta2	4098	4952	4316	5188	5432	5707	5812	5592	5420	5624	6211	6282
Cand1	7886	5849	6825	9697	8521	9634	9929	9441	10080	11707	10252	10405
Cand2	857	1305	940	1536	1344	1723	1326	1292	1142	1412	1546	1768
Cant1	1390	1170	1371	1543	1414	2008	1717	1631	1703	1888	1790	2029
Canx	35077	16156	21851	25674	28783	27294	28715	28108	27862	32368	28775	28333
Cap1	14594	19063	15482	27716	24344	29705	26112	23437	19991	24395	26230	28198
Cap2	430	1060	725	1837	1266	1433	1312	1306	1159	1135	1558	1533
Capg	543	723	598	671	646	1093	909	919	1720	1807	1248	1297
Capn1	1631	1790	1594	2253	1880	2842	2481	2479	2737	3263	2794	2948
Capn10	382	599	423	493	387	604	612	610	713	744	647	748
Capn11	51	0	18	0	14	7	1	3	0	2	0	5
Capn12	200	698	264	661	498	511	281	378	296	402	511	629
Capn13	136	10	124	63	55	70	39	80	53	95	26	91
Capn15	922	935	868	967	998	1167	1215	1222	1137	1187	1160	1141
Capn2	11539	13875	11497	17115	15842	19896	18540	16205	15630	16474	19426	20256
Capn3	36	88	34	48	27	60	69	44	46	57	46	39
Capn5	2644	3836	2609	4234	3128	4805	3625	3869	6418	8054	5335	4973
Capn6	46	23	16	75	25	60	65	32	71	80	68	75
Capn7	3444	2076	2607	2879	2919	3085	3126	2846	2963	3512	3011	3153
Capn8	6	14	7	1	4	15	3	2	12	14	8	8
Capn9	64	2	21	0	13	0	6	18	14	4	0	3
Capns1	170	1270	75	119	151	85	187	237	350	864	126	181
Capns2	4	15	23	0	3	15	6	4	30	41	15	37
Caprin1	18858	6667	12205	9331	13199	11633	12664	13910	13124	14985	11304	11771
Caprin2	676	977	881	701	701	919	849	943	1136	1273	1038	937
Caps2	2	0	0	0	3	0	0	0	0	0	0	0
Capsl	0	0	0	0	0	1	0	1	0	0	0	1
Capza1	7538	3666	4645	5053	6185	5849	5976	6084	6119	7428	5875	5920
Capza2	8322	3743	5475	6691	7094	6989	7225	7156	7147	8025	6992	6830
Capza3	0	0	0	0	0	0	0	0	0	0	0	0
Capzb	10632	6696	7108	10752	10042	10553	10732	10121	10288	10956	10444	10955
Car1	29	6	67	7	57	7	74	57	50	44	49	21
Car10	0	0	0	0	0	0	0	0	0	0	0	0
Car11	674	1713	789	1777	1242	1312	1856	1648	1519	1816	1897	2142
Car12	1022	19	267	21	406	12	149	153	108	181	29	76
Car13	684	64	247	85	265	162	180	250	244	250	119	149
Car14	225	133	207	154	180	173	239	218	227	228	228	223
Car15	0	0	0	0	1	0	0	0	0	0	0	3
Car2	1197	189	862	481	596	846	748	654	405	564	854	275
Car3	31892	51269	178017	24286	159601	67799	112398	184498	162130	177849	47120	69238
Car4	881	54	537	25	359	94	200	424	204	200	39	128
Car6	285	33	221	37	195	49	139	186	107	103	37	116
Car7	8	0	4	6	3	0	3	1	1	0	1	6
Car8	480	31	216	46	175	115	59	151	106	132	61	71
Car9	218	1499	256	977	392	583	540	623	457	534	879	1200
Card10	1449	1252	1723	831	1376	1444	1256	1758	2062	1935	1485	1483
Card11	131	138	88	86	46	165	77	95	140	134	111	129
Card14	403	604	463	610	433	679	487	480	418	527	495	701
Card19	759	679	487	660	688	662	703	738	565	739	690	734
Card6	2846	1296	2083	1393	2097	2407	1821	2343	2124	2920	1629	2081
Card9	150	78	143	42	166	69	113	131	119	143	99	115
Carf	1075	824	1010	933	897	1092	921	1033	1111	1195	1034	1025
Carhsp1	5045	2650	4293	3251	4120	4484	4264	4616	4573	5031	4167	4576
Carm1	2865	2087	2507	2397	2463	2637	2965	3044	2695	3177	2979	3143
Carmil1	1222	1861	1471	1575	1448	2497	1556	1504	1933	2308	1982	2134
Carmil2	137	220	63	124	95	197	85	98	457	372	278	110
Carmil3	92	156	67	32	55	49	69	65	323	537	230	66
Carnmt1	2215	638	1099	912	1286	1048	1183	1185	1132	1273	985	931
Carns1	1391	4576	1617	3375	2622	3170	3312	2994	2672	2818	3951	3858
Cars	1021	1074	1030	1295	1310	1357	1386	1239	1219	1431	1365	1431
Cars2	1258	728	972	659	957	801	931	962	951	965	758	1049
Cartpt	0	6	0	0	0	0	0	2	30	35	31	10
Casc1	314	711	450	622	388	592	592	597	706	778	654	811
Casc3	1923	1470	1484	1908	1948	2091	2301	2200	2147	2628	2275	2442
Casc4	1546	1699	1486	3162	2017	3040	2889	2301	2692	3063	3099	3202
Casd1	1736	1460	1490	1727	1498	1958	1658	1646	1935	2224	1608	1744
Cask	663	546	598	670	608	693	713	754	804	850	735	794
Caskin1	347	894	454	794	519	592	756	734	1326	1449	1088	957
Caskin2	3421	3413	3475	3627	3960	4436	4255	4276	4803	4525	5322	4753
Casp1	559	237	451	356	404	592	400	573	653	644	400	558
Casp12	990	1454	1006	2156	1638	2161	1835	1850	1558	2074	1853	2189
Casp14	0	0	0	0	0	0	0	0	0	0	0	0
Casp16	13	3	17	17	20	36	4	9	9	33	11	7
Casp2	1642	1467	1609	1835	1674	2295	1994	2135	2110	2317	2214	2156
Casp3	1144	922	888	1039	1047	1361	1164	1093	1184	1351	1032	1172
Casp4	497	582	628	597	622	782	665	556	784	939	687	707
Casp6	0	0	2	0	0	0	0	0	0	0	0	0
Casp7	981	607	922	750	949	914	807	948	1009	1026	779	963
Casp8	519	353	365	358	457	511	320	404	490	487	366	415
Casp8ap2	1540	1214	1572	1850	1710	2082	1713	1714	1836	1958	1921	1936
Casp9	794	547	708	578	726	650	784	684	822	685	672	747
Casq1	590	384	382	591	505	559	494	539	476	486	442	539
Casq2	7160	6422	4733	8831	9280	9747	8399	5666	4397	5750	6935	10352
Casr	0	0	0	0	0	5	1	0	1	1	0	0
Cass4	118	110	65	59	51	121	64	103	86	77	63	103
Cast	10485	9410	10694	12138	11263	13664	12476	12711	13060	14501	13266	12993
Casz1	766	866	581	824	838	755	673	895	1032	1118	1096	839
Cat	38482	4944	25209	4852	20327	7911	15826	21703	17145	18198	7552	12602
Catip	20	25	18	24	33	27	20	24	29	45	50	25
Catsper1	1	0	0	1	0	0	0	0	1	0	0	0
Catsper2	283	265	287	232	327	283	242	221	293	329	331	249
Catsper3	1	4	1	4	10	13	5	13	6	11	6	7
Catsper4	2	3	1	3	1	4	4	6	1	2	2	5
Catsperb	14	11	7	2	1	12	4	6	5	4	10	6
Catsperd	42	62	45	37	36	71	49	43	90	81	55	49
Catsperg1	158	465	405	290	249	299	281	316	579	495	417	564
Cav1	54157	24016	37906	37228	46599	44524	45383	44114	44174	43776	44270	43068
Cav2	11966	5488	9219	7890	10244	9859	9746	11037	10808	10619	9761	8294
Cav3	156	55	72	98	131	111	95	82	110	117	47	88
Cbarp	364	816	464	567	620	565	614	565	1212	1244	1138	683
Cbfa2t2	4235	4457	4445	5656	5005	5811	5163	5033	4812	4794	5304	5666
Cbfa2t3	6823	897	2258	741	2745	1688	1489	2155	1535	1635	1302	1148
Cbfb	1704	1543	1511	2315	2067	2578	1814	1944	2087	2495	2269	2043
Cbl	6301	7623	6793	7833	7823	9576	7931	7682	8852	10106	9364	9370
Cblb	5704	3862	4732	3557	4449	5158	4104	4536	4114	5013	4006	4929
Cblc	34	21	12	31	39	41	51	9	21	21	33	14
Cbll1	1294	1025	1106	1260	1338	1451	1472	1398	1396	1697	1478	1461
Cbln1	27	7	12	9	18	2	22	6	9	14	23	8
Cbln2	155	1012	101	92	186	310	188	80	98	249	164	146
Cbln3	7	6	4	15	8	29	2	13	8	5	7	10
Cbln4	0	0	0	0	0	0	0	0	1	0	0	0
Cbr1	2	13	10	12	5	2	7	36	45	7	3	8
Cbr3	283	597	773	434	653	576	581	1167	1704	1281	488	555
Cbr4	1181	225	670	304	532	350	488	695	499	495	342	401
Cbs	242	192	426	121	145	235	103	279	280	389	147	133
Cbwd1	363	198	291	137	225	259	236	305	296	278	227	296
Cbx1	2051	997	1454	1666	1749	1609	1799	1763	1791	1792	1881	1920
Cbx2	449	56	250	25	124	58	84	190	117	145	89	70
Cbx3	2246	1468	1925	2567	2333	2626	2737	2568	2561	2863	2570	2623
Cbx4	1536	362	870	317	709	406	461	888	586	648	406	504
Cbx5	1374	772	1016	1650	1616	1694	1714	1526	1731	2013	1697	1985
Cbx6	6035	9261	8321	15380	11075	15254	13876	12850	11671	13377	15886	16601
Cbx7	2169	3540	2859	4409	3444	5080	4517	4133	4257	4425	4680	5646
Cbx8	397	118	254	141	233	218	180	263	161	249	178	202
Cby1	631	349	460	814	631	723	767	791	796	784	833	829
Cby3	49	19	71	29	64	33	52	58	61	58	41	39
Cc2d1a	1158	1536	1144	1513	1263	1718	1693	1643	1740	1865	1839	1972
Cc2d1b	1742	1844	1653	1634	1651	1971	1948	2026	2112	2335	2112	2208
Cc2d2a	1657	2251	2110	2238	1973	2552	2069	2269	2210	2360	2195	2695
Cc2d2b	1	1	0	0	1	0	0	0	2	0	0	0
Ccar1	1284	850	797	894	1080	1080	1052	1161	1051	1433	1208	1172
Ccar2	3148	2675	2929	2982	3169	3494	3551	3568	3623	4002	3661	4052
Ccbe1	80	36	108	135	99	208	77	176	165	268	82	182
Ccdc102a	401	463	405	518	509	610	564	515	532	546	625	623
Ccdc103	0	1	1	1	1	0	2	1	4	1	17	0
Ccdc105	0	0	0	1	0	0	0	0	0	0	0	0
Ccdc106	388	308	271	277	374	353	357	317	323	337	333	341
Ccdc107	568	663	620	802	792	1168	817	857	805	918	889	953
Ccdc110	0	0	0	0	1	3	2	1	0	0	0	1
Ccdc112	205	254	189	309	247	309	264	225	261	306	213	262
Ccdc113	2	0	2	0	0	0	0	1	3	3	2	0
Ccdc114	17	34	31	21	23	29	17	25	36	48	16	37
Ccdc115	537	388	387	500	533	660	594	648	684	784	658	636
Ccdc116	0	0	0	0	0	5	8	0	4	12	2	1
Ccdc117	1098	699	966	2377	2254	1529	1066	1126	1248	1319	1379	1780
Ccdc12	499	260	357	336	365	470	371	458	358	423	366	376
Ccdc120	98	236	180	178	200	272	222	231	181	261	252	291
Ccdc121	8	4	3	7	3	21	12	9	8	2	7	5
Ccdc122	100	51	66	27	52	74	42	34	95	57	33	21
Ccdc124	1142	652	836	691	921	889	862	993	868	986	877	916
Ccdc125	234	182	231	179	214	272	195	219	224	259	186	191
Ccdc126	481	269	418	501	426	521	475	469	441	509	395	492
Ccdc127	1654	1127	1409	1963	1786	1987	2049	1974	1957	2263	1898	2053
Ccdc129	0	0	0	0	0	2	1	0	0	0	2	0
Ccdc13	1	10	6	11	1	1	16	13	26	31	26	21
Ccdc130	442	475	373	449	464	513	529	495	535	597	570	607
Ccdc134	322	223	310	221	267	267	249	277	258	350	283	286
Ccdc136	74	217	132	103	120	136	114	163	437	455	301	224
Ccdc137	454	415	418	574	570	671	638	666	536	704	729	613
Ccdc138	296	403	381	360	328	409	340	336	433	410	327	438
Ccdc14	660	732	653	656	533	738	665	682	711	767	602	865
Ccdc141	2515	6811	3350	5548	4824	6316	4809	4119	3545	4095	4967	5754
Ccdc142	13	152	22	10	70	105	54	39	92	26	23	119
Ccdc144b	0	0	0	0	0	0	0	0	1	0	0	0
Ccdc146	23	62	25	23	24	32	12	31	51	30	20	24
Ccdc147	0	0	0	0	0	0	0	0	0	0	0	0
Ccdc148	6	4	5	1	3	4	7	7	7	6	15	3
Ccdc149	1624	1536	1449	2308	1763	2464	1742	1803	1837	1820	2125	2207
Ccdc15	606	392	581	556	542	673	568	514	630	688	529	621
[truncated: 20,602 more rows]

## Sheet: circRNA counts
circRNA_id	C-1	C-2	C-3	C-4	C-5	C-6	H-1	H-2	H-3	H-4	H-5	H-6
circRNA_0001|Chr1:196929_243681_-	0	0	0	0	0	0	0	0	3	0	0	0
circRNA_0002|Chr1:1742558_1750895_-	0	0	2	0	0	0	0	0	0	0	0	0
circRNA_0003|Chr1:1795668_1804206_+	0	0	0	0	0	0	2	0	0	0	0	0
circRNA_0004|Chr1:1802693_1807003_+	0	0	0	0	0	0	0	0	0	0	0	3
circRNA_0005|Chr1:1841452_1846589_+	0	0	3	3	2	3	0	2	0	4	3	4
circRNA_0006|Chr1:1901431_1909369_+	0	0	0	0	0	0	0	0	0	2	0	0
circRNA_0007|Chr1:2375315_2377265_-	0	2	0	2	3	0	7	6	3	0	3	4
circRNA_0008|Chr1:2425879_2452054_-	0	0	0	0	0	0	0	0	0	0	0	2
circRNA_0009|Chr1:2839790_2849731_-	0	0	2	0	4	6	2	0	2	2	3	4
circRNA_0010|Chr1:2843547_2910994_-	0	0	0	0	0	0	0	0	2	0	0	0
circRNA_0011|Chr1:2876047_2910994_-	0	0	0	0	2	0	0	0	0	0	0	0
circRNA_0012|Chr1:3941650_3949063_-	3	5	0	0	0	0	0	0	0	3	0	0
circRNA_0013|Chr1:5577004_5577188_-	0	0	0	0	0	0	0	0	2	0	0	0
circRNA_0014|Chr1:6494975_6514414_-	0	0	0	0	0	0	0	0	0	0	0	3
circRNA_0015|Chr1:6521963_6601608_-	0	0	0	0	0	0	2	0	0	0	0	0
circRNA_0016|Chr1:6534185_6546490_-	0	2	0	0	0	0	0	0	0	0	0	0
circRNA_0017|Chr1:6534185_6575208_-	3	0	0	0	0	0	2	2	0	2	0	0
circRNA_0018|Chr1:6575079_6601608_-	0	0	0	0	2	0	0	0	0	0	0	0
circRNA_0019|Chr1:6601452_6613874_-	2	5	2	3	3	12	2	7	6	4	4	0
circRNA_0020|Chr1:6613702_6703165_-	0	0	0	0	2	0	0	0	0	0	0	0
circRNA_0021|Chr1:6702976_6745333_-	0	3	0	0	0	0	0	3	0	0	0	0
circRNA_0022|Chr1:6702976_6754239_-	0	0	0	0	0	0	2	0	0	0	0	2
circRNA_0023|Chr1:6769296_6829781_-	0	0	0	0	0	0	0	0	0	2	0	0
circRNA_0024|Chr1:6787514_6788540_-	0	0	0	0	0	0	0	0	0	2	0	0
circRNA_0025|Chr1:6787514_6819230_-	2	0	0	0	0	0	0	0	0	0	0	0
circRNA_0026|Chr1:6800132_6819230_-	0	0	3	0	2	0	0	3	0	0	0	2
circRNA_0027|Chr1:6800132_6829781_-	0	0	3	2	0	0	0	0	0	0	0	0
circRNA_0028|Chr1:6804365_6816920_-	5	6	3	3	0	4	3	2	0	9	6	5
circRNA_0029|Chr1:6804365_6824947_-	0	4	0	0	3	0	3	0	2	0	2	3
circRNA_0030|Chr1:6810305_6829781_-	0	0	0	0	2	0	3	2	0	0	2	0
circRNA_0031|Chr1:6824828_6840750_-	0	0	0	0	0	0	0	2	0	0	0	0
circRNA_0032|Chr1:6829555_6903293_-	0	0	0	0	0	0	0	0	2	0	0	0
circRNA_0033|Chr1:6829555_6903320_-	0	0	0	0	2	0	0	0	0	4	0	0
circRNA_0034|Chr1:6829578_6853903_-	0	0	0	0	0	0	0	0	0	2	0	0
circRNA_0035|Chr1:6834244_6853903_-	0	2	0	0	2	2	0	0	0	3	0	0
circRNA_0036|Chr1:6837861_6841171_-	0	4	2	2	0	0	0	2	4	3	0	2
circRNA_0037|Chr1:7263796_7264258_+	0	0	2	0	0	0	0	0	0	0	0	0
circRNA_0038|Chr1:7392046_7443859_-	2	0	0	0	0	0	0	3	0	0	4	0
circRNA_0039|Chr1:7698480_7699685_-	0	0	0	0	0	0	0	0	0	2	0	0
circRNA_0040|Chr1:7956193_7976859_-	2	0	0	0	0	0	0	0	0	0	0	0
circRNA_0041|Chr1:7961776_7973865_-	0	0	3	0	0	0	0	0	0	2	0	0
circRNA_0042|Chr1:7973764_7976859_-	2	0	0	0	4	0	0	0	0	0	0	0
circRNA_0043|Chr1:7973764_7999779_-	0	0	0	0	0	0	0	3	0	0	0	0
circRNA_0044|Chr1:8846801_8860029_-	6	0	0	3	2	3	4	2	0	5	3	3
circRNA_0045|Chr1:8856235_8860029_-	0	0	0	2	0	0	0	0	0	0	0	0
circRNA_0046|Chr1:12057747_12077227_-	0	0	0	3	0	0	0	0	0	0	0	0
circRNA_0047|Chr1:12086530_12134025_+	0	0	0	0	0	0	0	2	0	0	0	2
circRNA_0048|Chr1:12128638_12134025_+	4	0	3	6	5	0	3	3	2	6	4	2
circRNA_0049|Chr1:12128638_12158667_+	5	2	2	2	7	7	8	3	5	6	8	5
circRNA_0050|Chr1:12452484_12454601_-	0	10	0	0	0	3	0	0	6	0	2	0
circRNA_0051|Chr1:13262070_13268495_+	0	0	0	3	2	2	2	0	0	2	0	3
circRNA_0052|Chr1:13696687_13704515_+	2	0	0	0	0	0	0	0	0	0	0	0
circRNA_0053|Chr1:13696687_13704812_+	0	0	0	0	0	2	0	0	0	0	0	0
circRNA_0054|Chr1:15474913_15494771_+	0	0	3	2	0	0	0	0	0	0	0	0
circRNA_0055|Chr1:15474913_15514085_+	0	2	0	0	0	0	0	0	0	0	0	0
circRNA_0056|Chr1:15484245_15494771_+	0	0	0	0	2	0	0	0	0	3	0	0
circRNA_0057|Chr1:15488392_15494771_+	33	14	30	24	19	47	44	27	14	32	28	35
circRNA_0058|Chr1:15488392_15526167_+	4	0	0	2	3	3	3	4	2	0	0	0
circRNA_0059|Chr1:15488392_15551204_+	2	0	0	0	0	0	0	0	0	0	0	0
circRNA_0060|Chr1:15545013_15551204_+	0	0	2	0	2	4	2	0	0	0	0	0
circRNA_0061|Chr1:15812862_15820838_+	0	3	0	0	0	0	0	0	0	0	0	0
circRNA_0062|Chr1:15901237_15906117_-	0	0	0	0	0	2	0	0	0	0	0	0
circRNA_0063|Chr1:16530001_16582189_+	0	0	0	0	0	2	2	0	0	0	2	0
circRNA_0064|Chr1:16530001_16596949_+	0	0	0	0	2	0	0	0	0	0	0	0
circRNA_0065|Chr1:16859047_16875754_+	2	0	2	2	0	0	3	3	0	3	0	4
circRNA_0066|Chr1:16859047_16879498_+	0	0	0	0	0	0	0	0	0	0	4	0
circRNA_0067|Chr1:16872734_16875754_+	2	0	0	0	0	0	0	0	0	2	0	0
circRNA_0068|Chr1:17740072_17740365_-	0	0	2	0	0	0	0	0	0	0	0	0
circRNA_0069|Chr1:17740072_17769428_-	0	0	0	0	3	0	3	3	0	0	0	0
circRNA_0070|Chr1:18644225_18655979_+	0	0	0	0	0	0	0	0	0	4	0	0
circRNA_0071|Chr1:18644225_18694013_+	2	5	0	0	3	4	7	3	3	6	7	0
circRNA_0072|Chr1:18950547_18972208_+	0	0	0	0	0	3	0	0	0	0	0	0
circRNA_0073|Chr1:20001797_20064171_+	2	0	0	0	0	0	0	0	0	0	0	0
circRNA_0074|Chr1:20022792_20047889_+	2	0	6	7	6	4	6	2	3	7	7	0
circRNA_0075|Chr1:20961258_20962540_-	2	0	2	0	2	0	2	0	3	0	2	0
circRNA_0076|Chr1:21142145_21149467_+	0	0	0	0	0	0	0	0	0	0	3	0
circRNA_0077|Chr1:21142145_21164430_+	2	4	4	7	3	5	5	0	0	3	6	5
circRNA_0078|Chr1:21142145_21211619_+	0	0	0	2	0	0	2	3	0	0	0	0
circRNA_0079|Chr1:21149313_21164430_+	3	0	0	0	0	0	0	0	2	0	0	2
circRNA_0080|Chr1:21149313_21211619_+	5	4	2	0	4	5	2	3	0	6	3	2
circRNA_0081|Chr1:21155684_21211619_+	0	0	0	0	2	0	0	0	0	0	0	0
circRNA_0082|Chr1:21155741_21164430_+	0	0	0	0	0	0	0	0	0	2	0	0
circRNA_0083|Chr1:21160905_21164430_+	3	0	2	0	0	0	0	0	0	0	0	0
circRNA_0084|Chr1:21160905_21190087_+	0	0	4	0	0	3	0	0	0	0	0	0
circRNA_0085|Chr1:21160905_21211619_+	3	0	3	4	3	4	4	7	3	6	13	4
circRNA_0086|Chr1:21189975_21211619_+	3	0	2	0	4	5	0	3	4	4	0	0
circRNA_0087|Chr1:21647066_21669779_+	0	0	0	0	0	0	0	0	0	3	0	0
circRNA_0088|Chr1:21854180_21854768_-	0	0	0	0	0	0	2	0	0	0	0	0
circRNA_0089|Chr1:22707360_22707595_-	3	0	0	4	0	0	2	0	0	0	0	0
circRNA_0090|Chr1:22725080_22738713_-	0	0	0	0	0	0	0	0	3	0	0	0
circRNA_0091|Chr1:22735614_22738713_-	2	0	5	4	5	0	4	0	4	2	3	0
circRNA_0092|Chr1:23995884_24002194_+	0	0	0	0	3	0	0	3	0	0	0	3
circRNA_0093|Chr1:24014465_24037722_-	0	0	0	0	0	0	2	0	0	0	0	0
circRNA_0094|Chr1:25689310_25717078_+	4	0	0	0	0	0	0	0	0	0	0	0
circRNA_0095|Chr1:25710564_25787662_-	0	0	2	0	0	0	0	0	0	0	0	4
circRNA_0096|Chr1:25716606_25787662_-	2	0	0	2	0	0	0	4	0	2	6	2
circRNA_0097|Chr1:25734938_25793466_-	0	0	0	0	2	2	0	0	0	0	0	0
circRNA_0098|Chr1:25767968_25787662_-	12	9	19	38	25	33	36	34	17	36	43	30
circRNA_0099|Chr1:25767968_25793466_-	4	0	6	4	7	8	8	8	0	8	11	17
circRNA_0100|Chr1:25767968_25793561_-	0	0	3	0	0	0	0	0	0	0	0	0
circRNA_0101|Chr1:28226117_28232906_-	0	0	0	0	0	0	2	0	0	0	0	0
circRNA_0102|Chr1:28253104_28286937_-	2	2	2	4	2	8	2	3	3	4	4	0
circRNA_0103|Chr1:28253104_28286947_-	0	0	0	0	0	0	0	0	0	0	2	0
circRNA_0104|Chr1:28362167_28375861_+	2	0	0	0	2	0	2	0	0	2	2	3
circRNA_0105|Chr1:28362167_28391305_+	0	0	0	0	2	2	0	2	0	4	0	0
circRNA_0106|Chr1:29440764_29462756_+	0	0	0	2	2	0	0	0	0	0	0	0
circRNA_0107|Chr1:29457380_29462756_+	2	0	4	2	0	0	0	0	0	2	0	0
circRNA_0108|Chr1:29457380_29471715_+	0	2	4	2	4	0	0	0	3	0	6	0
circRNA_0109|Chr1:30711411_30718495_+	0	0	0	2	0	0	0	0	0	0	0	0
circRNA_0110|Chr1:31714405_31718649_+	2	0	0	0	0	3	0	0	0	0	0	0
circRNA_0111|Chr1:31947095_31956591_-	0	0	0	2	0	0	0	0	0	0	0	0
circRNA_0112|Chr1:31950617_31954909_-	0	6	3	4	9	6	5	3	0	0	6	6
circRNA_0113|Chr1:31950617_31962268_-	0	4	0	0	0	0	6	0	0	0	0	2
circRNA_0114|Chr1:35111517_35128794_+	3	0	0	0	0	0	0	0	0	0	0	0
circRNA_0115|Chr1:35307681_35316189_+	0	0	0	2	0	0	0	0	0	0	0	0
circRNA_0116|Chr1:36407810_36419485_+	0	0	0	0	0	0	3	3	2	0	3	3
circRNA_0117|Chr1:36417425_36419485_+	4	3	0	10	6	3	5	5	2	5	2	3
circRNA_0118|Chr1:37749906_37769487_+	0	0	0	0	0	0	0	0	2	0	0	0
circRNA_0119|Chr1:37811063_37811741_-	0	0	0	2	3	0	2	0	0	0	0	0
circRNA_0120|Chr1:37875227_37886617_-	0	0	0	0	0	0	0	0	0	2	0	0
circRNA_0121|Chr1:37988341_37990001_-	2	0	0	0	0	0	0	2	0	2	3	0
circRNA_0122|Chr1:39876532_39880408_+	2	0	3	2	2	5	3	0	0	4	0	4
circRNA_0123|Chr1:40433889_40459139_+	5	2	2	0	0	0	0	0	0	0	2	0
circRNA_0124|Chr1:40949992_40955468_-	2	0	3	0	0	0	0	0	0	0	0	0
circRNA_0125|Chr1:41072514_41075117_+	0	0	0	2	0	0	0	3	2	0	0	0
circRNA_0126|Chr1:41702424_41777223_-	0	0	0	3	0	0	0	0	0	0	0	0
circRNA_0127|Chr1:41787939_41796360_-	3	0	0	0	2	0	0	0	0	0	0	0
circRNA_0128|Chr1:41834768_41838187_-	0	0	0	0	0	0	2	0	0	4	0	0
circRNA_0129|Chr1:42508955_42530725_-	0	0	0	0	0	3	3	0	0	0	2	0
circRNA_0130|Chr1:42970702_42981490_-	4	0	0	0	0	0	0	0	0	0	0	0
circRNA_0131|Chr1:43797777_43806044_-	3	5	2	0	4	4	0	3	2	2	4	3
circRNA_0132|Chr1:44045275_44061740_+	0	0	0	2	0	0	0	0	0	0	0	0
circRNA_0133|Chr1:44056456_44061740_+	0	0	0	0	0	0	0	0	4	0	0	0
circRNA_0134|Chr1:44056456_44069073_+	0	0	0	0	0	3	0	0	0	0	0	0
circRNA_0135|Chr1:44117529_44119982_+	2	0	0	0	0	2	0	0	0	0	0	0
circRNA_0136|Chr1:44366948_44372134_+	0	0	0	0	0	0	0	0	0	2	0	0
circRNA_0137|Chr1:44368476_44393411_+	0	0	0	0	0	0	0	0	0	2	0	0
circRNA_0138|Chr1:45923228_46014665_+	6	3	10	5	10	6	2	6	3	7	3	7
circRNA_0139|Chr1:45983794_46014665_+	0	0	0	0	0	0	2	0	0	0	0	0
circRNA_0140|Chr1:46782630_46791828_+	0	2	0	0	0	0	0	0	0	0	0	0
circRNA_0141|Chr1:46813340_46823620_+	0	0	0	0	0	0	2	0	0	0	0	0
circRNA_0142|Chr1:46923563_46926987_+	0	0	0	0	2	0	0	0	0	0	0	0
circRNA_0143|Chr1:46923563_46929519_+	0	0	0	0	0	0	5	0	0	0	0	0
circRNA_0144|Chr1:46959021_46968866_-	6	2	3	5	0	8	0	3	3	2	0	4
circRNA_0145|Chr1:47030544_47032563_+	4	0	0	0	2	0	0	0	0	3	3	2
circRNA_0146|Chr1:47030544_47077979_+	3	0	2	3	0	2	0	0	0	2	0	0
circRNA_0147|Chr1:47095968_47114837_+	0	0	0	0	0	0	0	0	0	0	3	0
circRNA_0148|Chr1:47915029_47916946_-	4	3	2	0	3	4	0	2	0	0	3	2
circRNA_0149|Chr1:47958508_47959990_-	0	0	3	0	0	0	0	0	0	0	0	0
circRNA_0150|Chr1:48197935_48216055_+	0	2	0	0	0	0	0	0	0	0	0	0
circRNA_0151|Chr1:48220382_48221758_+	0	0	0	0	0	0	2	2	2	0	0	3
circRNA_0152|Chr1:48507280_48507713_+	0	0	0	2	0	0	0	0	0	0	0	0
circRNA_0153|Chr1:48792572_48797638_-	2	2	0	2	3	0	2	4	5	5	0	2
circRNA_0154|Chr1:53753552_53761175_-	0	0	0	0	0	0	0	0	0	2	0	0
circRNA_0155|Chr1:53777350_53799681_-	0	0	0	0	0	0	0	0	0	0	2	0
circRNA_0156|Chr1:54441038_54455357_-	0	0	0	0	0	0	0	0	0	2	0	0
circRNA_0157|Chr1:56366809_56370833_+	0	0	0	0	0	2	0	0	0	0	0	0
circRNA_0158|Chr1:56668984_56669481_-	3	0	0	0	0	0	0	0	0	0	3	0
circRNA_0159|Chr1:57358582_57373925_+	2	0	0	0	0	0	0	0	0	0	0	0
circRNA_0160|Chr1:57358582_57374456_+	2	0	0	2	0	0	0	0	0	0	0	0
circRNA_0161|Chr1:57482645_57486283_-	0	0	0	0	0	0	0	3	0	0	0	2
circRNA_0162|Chr1:57504814_57506867_+	2	0	0	0	0	0	0	0	0	0	0	0
circRNA_0163|Chr1:57709952_57712920_+	0	0	0	2	2	3	0	0	2	0	0	0
circRNA_0164|Chr1:57742000_57744248_+	0	0	2	0	0	0	2	0	0	0	0	0
circRNA_0165|Chr1:61388743_61406321_+	2	0	0	0	2	5	3	0	2	2	0	0
circRNA_0166|Chr1:61731938_61734052_+	0	0	0	0	0	0	0	0	0	3	4	0
circRNA_0167|Chr1:62330221_62360073_-	2	0	0	0	0	0	0	0	0	0	0	2
circRNA_0168|Chr1:62532596_62541278_-	0	0	0	0	0	0	0	3	0	0	0	0
circRNA_0169|Chr1:64133551_64133941_-	2	0	0	0	0	0	0	0	0	2	0	0
circRNA_0170|Chr1:64721324_64732312_+	0	2	0	0	0	0	0	0	0	0	0	0
circRNA_0171|Chr1:64721466_64732312_+	0	0	0	0	0	2	0	0	0	0	0	0
circRNA_0172|Chr1:65115127_65166133_-	2	0	0	0	2	0	0	2	0	0	3	0
circRNA_0173|Chr1:65154293_65166133_-	4	0	0	0	0	0	0	0	0	0	0	0
circRNA_0174|Chr1:65850468_65852263_+	2	0	0	2	0	0	3	3	3	8	2	2
circRNA_0175|Chr1:66212117_66216392_-	0	0	0	0	0	0	0	0	0	5	0	0
circRNA_0176|Chr1:71172712_71178123_-	0	0	0	0	0	0	3	0	0	2	0	0
circRNA_0177|Chr1:72317544_72321634_-	0	0	0	0	0	0	0	2	0	0	0	0
circRNA_0178|Chr1:72358337_72360751_+	0	0	0	0	0	0	0	0	3	0	0	0
circRNA_0179|Chr1:72537392_72539371_+	0	0	0	0	0	0	0	3	0	0	2	0
circRNA_0180|Chr1:73736151_73737496_-	0	0	0	0	0	0	0	0	2	0	0	0
circRNA_0181|Chr1:73736838_73737496_-	0	0	0	0	2	0	3	2	4	4	4	4
circRNA_0182|Chr1:77847267_77855727_-	0	3	0	0	0	0	0	0	0	0	0	0
circRNA_0183|Chr1:77872644_77874388_-	3	0	0	0	2	0	3	0	0	5	0	2
circRNA_0184|Chr1:78018827_78020623_+	0	0	0	0	0	0	0	0	0	0	0	3
circRNA_0185|Chr1:78369712_78370333_+	4	0	3	4	7	3	3	4	6	9	5	4
circRNA_0186|Chr1:78518319_78522187_-	5	0	3	0	2	0	0	0	0	3	0	0
circRNA_0187|Chr1:78808552_78808927_+	0	0	0	0	0	0	2	0	0	2	0	2
circRNA_0188|Chr1:79649510_79650244_+	0	0	0	0	0	3	0	0	0	0	0	2
circRNA_0189|Chr1:79805721_79807455_-	0	0	2	0	0	0	0	0	0	0	0	0
circRNA_0190|Chr1:79805721_79810373_-	0	0	0	0	0	3	0	0	0	0	0	0
circRNA_0191|Chr1:79807301_79810373_-	0	0	2	0	0	4	4	0	4	0	0	0
circRNA_0192|Chr1:79945447_79946090_+	0	0	4	0	0	0	0	0	0	0	2	3
circRNA_0193|Chr1:80051932_80052296_-	0	0	0	4	3	0	0	0	0	0	3	0
circRNA_0194|Chr1:80097757_80106150_+	2	0	0	0	0	0	0	2	0	0	0	0
circRNA_0195|Chr1:80102702_80106150_+	0	0	0	0	0	0	2	0	0	0	0	0
circRNA_0196|Chr1:80443035_80446422_-	4	0	0	4	0	2	4	5	3	4	3	4
circRNA_0197|Chr1:80524238_80529961_-	0	2	0	0	0	0	0	0	0	0	0	0
circRNA_0198|Chr1:80531274_80533715_-	0	0	0	0	0	2	0	0	0	0	0	0
circRNA_0199|Chr1:80655201_80655563_-	3	0	0	0	0	0	0	0	0	0	0	0
circRNA_0200|Chr1:80676730_80677170_-	0	0	0	0	0	0	0	0	0	0	2	0
circRNA_0201|Chr1:80823878_80831295_-	2	0	2	0	0	0	0	0	0	2	0	3
circRNA_0202|Chr1:80828696_80831295_-	0	0	0	0	2	0	0	0	0	2	0	0
circRNA_0203|Chr1:80951092_80955074_+	0	0	0	0	0	0	0	2	0	0	0	0
circRNA_0204|Chr1:81437928_81438850_+	0	3	0	0	0	5	2	0	4	4	2	3
circRNA_0205|Chr1:82155654_82156692_+	0	0	0	0	0	0	0	0	3	0	0	0
circRNA_0206|Chr1:82251338_82251508_-	3	0	0	0	2	0	2	0	0	0	0	0
circRNA_0207|Chr1:82431365_82435004_-	0	0	0	2	0	0	0	0	0	0	0	0
circRNA_0208|Chr1:82536923_82543222_-	0	0	0	0	0	0	0	0	0	0	3	0
circRNA_0209|Chr1:82568170_82572050_-	0	0	0	0	0	0	0	0	0	0	2	0
circRNA_0210|Chr1:84060848_84061187_+	0	0	0	0	0	0	0	0	0	5	2	2
circRNA_0211|Chr1:84136705_84138105_-	0	0	0	2	0	0	0	0	0	0	0	0
circRNA_0212|Chr1:84418344_84431239_+	5	0	0	3	0	3	0	0	0	0	3	0
circRNA_0213|Chr1:84431128_84445320_+	2	0	0	0	0	0	2	0	0	0	0	0
circRNA_0214|Chr1:84536190_84615182_+	0	0	2	0	0	3	0	0	0	0	0	0
circRNA_0215|Chr1:84542396_84615182_+	0	0	0	3	0	6	2	2	0	6	0	3
circRNA_0216|Chr1:84542396_84642306_+	2	0	0	0	0	0	0	3	0	0	2	0
circRNA_0217|Chr1:84623372_84642306_+	0	0	0	0	0	0	2	0	0	0	0	0
circRNA_0218|Chr1:84640085_84679646_+	0	0	0	0	0	0	0	3	2	0	0	0
circRNA_0219|Chr1:84731816_84742944_-	0	0	0	0	0	0	0	0	0	2	0	0
circRNA_0220|Chr1:85396267_85397462_+	0	0	0	0	0	2	2	0	0	0	0	0
circRNA_0221|Chr1:86877736_86888952_+	0	0	5	0	0	0	0	0	0	24	0	0
circRNA_0222|Chr1:86959822_86961809_+	0	0	0	0	2	0	0	0	0	2	0	0
circRNA_0223|Chr1:87010380_87010777_+	3	0	2	0	0	3	0	4	3	2	0	0
circRNA_0224|Chr1:87096526_87098627_-	2	0	2	2	3	3	0	0	2	2	5	4
circRNA_0225|Chr1:87096526_87100953_-	0	0	9	0	0	0	0	0	0	0	0	0
circRNA_0226|Chr1:87100867_87103353_-	4	0	0	0	0	0	0	0	0	0	0	0
circRNA_0227|Chr1:87942271_87942810_+	0	0	0	0	0	5	0	0	0	0	0	0
circRNA_0228|Chr1:88145614_88147210_-	0	0	0	0	0	4	0	0	0	0	3	0
circRNA_0229|Chr1:88583266_88587175_+	2	0	2	0	0	0	0	0	2	6	0	0
circRNA_0230|Chr1:88583266_88592011_+	0	0	0	0	0	2	0	0	0	2	0	0
circRNA_0231|Chr1:88586283_88592011_+	0	0	4	0	0	0	0	0	0	0	0	0
circRNA_0232|Chr1:88586311_88592011_+	3	0	0	2	0	3	0	0	0	2	0	4
circRNA_0233|Chr1:89869828_89871257_-	0	0	0	0	3	2	0	3	2	0	0	0
circRNA_0234|Chr1:89972723_89975077_-	0	0	0	0	0	0	3	0	0	0	0	4
circRNA_0235|Chr1:90104656_90116631_-	0	0	0	2	0	0	0	0	0	0	0	0
circRNA_0236|Chr1:90116534_90119029_-	0	0	0	0	0	0	0	0	0	2	0	0
circRNA_0237|Chr1:90116534_90120765_-	0	0	0	0	0	2	0	0	0	0	0	0
circRNA_0238|Chr1:90116534_90126552_-	3	3	2	4	0	8	7	2	2	7	8	0
circRNA_0239|Chr1:90116534_90150334_-	0	0	3	3	0	0	0	2	0	2	3	0
circRNA_0240|Chr1:90118871_90150334_-	0	0	0	0	0	0	0	0	0	0	3	0
circRNA_0241|Chr1:90126352_90150334_-	0	0	2	0	0	0	0	0	0	0	0	0
circRNA_0242|Chr1:90149090_90150334_-	0	0	0	0	0	0	0	0	2	0	0	0
circRNA_0243|Chr1:90149090_90151408_-	0	0	0	0	0	0	2	0	0	0	0	5
circRNA_0244|Chr1:91551829_91554781_-	0	0	0	0	0	3	0	0	0	0	0	0
circRNA_0245|Chr1:91551829_91558124_-	0	0	0	0	0	0	0	2	0	0	0	0
circRNA_0246|Chr1:91560398_91562180_-	2	3	0	2	2	2	0	2	0	0	2	2
circRNA_0247|Chr1:91671407_91673515_+	4	3	0	0	3	6	0	0	3	2	0	4
circRNA_0248|Chr1:91873487_91879026_+	6	0	3	4	5	7	5	5	3	7	4	8
circRNA_0249|Chr1:91883192_91887419_+	2	0	0	4	0	0	2	3	0	0	2	4
circRNA_0250|Chr1:92019482_92024931_-	0	2	0	0	0	0	0	0	0	0	0	0
circRNA_0251|Chr1:92039556_92043956_-	3	0	3	2	0	2	6	0	5	6	3	2
circRNA_0252|Chr1:92104921_92112574_-	0	0	0	0	0	0	0	0	0	2	0	0
circRNA_0253|Chr1:94027353_94093275_-	0	4	0	0	0	0	0	0	2	2	0	0
circRNA_0254|Chr1:94328187_94337571_-	0	0	0	0	2	0	0	0	0	0	0	0
circRNA_0255|Chr1:94346653_94368553_-	0	0	0	0	0	0	0	2	0	0	0	0
circRNA_0256|Chr1:94356152_94368553_-	0	0	0	0	0	2	0	0	0	0	0	0
circRNA_0257|Chr1:94367453_94381994_-	0	0	4	0	0	0	0	0	0	0	0	0
circRNA_0258|Chr1:98186648_98188041_+	0	0	0	0	0	2	0	0	0	0	0	0
circRNA_0259|Chr1:99510577_99533851_+	3	6	0	7	0	6	2	3	5	5	9	4
circRNA_0260|Chr1:99510577_99533867_+	0	0	0	0	0	2	0	0	0	0	0	0
circRNA_0261|Chr1:99532444_99539093_+	0	0	2	0	0	2	0	0	0	0	0	0
circRNA_0262|Chr1:100476154_100476853_-	0	0	0	0	0	0	0	0	2	3	0	0
circRNA_0263|Chr1:100516688_100517438_-	11	0	3	0	2	0	0	0	2	4	0	0
circRNA_0264|Chr1:100780455_100781411_+	0	0	0	0	0	3	2	0	0	0	0	0
circRNA_0265|Chr1:100808698_100808859_+	0	0	0	0	0	0	0	0	2	0	0	3
circRNA_0266|Chr1:100808704_100808865_+	0	0	0	0	0	0	2	0	0	0	0	0
circRNA_0267|Chr1:100905551_100906160_-	0	0	0	0	0	0	0	0	0	0	3	0
circRNA_0268|Chr1:100913425_100914082_-	0	0	0	0	0	0	0	0	0	3	2	0
circRNA_0269|Chr1:100994983_100995166_-	0	0	0	0	0	0	0	0	0	3	0	0
circRNA_0270|Chr1:101006777_101008268_-	0	0	0	0	0	0	0	0	0	2	0	0
circRNA_0271|Chr1:101028250_101029473_-	2	3	0	4	0	0	2	0	0	4	0	3
circRNA_0272|Chr1:101139122_101139642_-	0	0	0	0	0	0	0	2	0	0	0	0
circRNA_0273|Chr1:101316233_101317554_-	0	0	0	0	0	0	0	0	0	2	0	0
circRNA_0274|Chr1:101482732_101486932_-	3	0	0	0	0	0	0	0	0	0	0	0
circRNA_0275|Chr1:101490358_101491796_-	0	3	0	0	0	3	0	0	0	0	2	2
circRNA_0276|Chr1:101522052_101522524_+	0	0	0	0	0	0	0	0	0	2	0	0
circRNA_0277|Chr1:102054490_102056424_+	0	0	0	0	0	0	0	0	0	0	0	2
circRNA_0278|Chr1:102613968_102660697_-	2	2	0	4	2	3	5	4	0	3	0	4
circRNA_0279|Chr1:102638885_102660697_-	0	2	0	0	0	0	0	3	2	2	0	4
circRNA_0280|Chr1:102656457_102660697_-	0	0	3	0	0	0	0	0	0	0	0	0
circRNA_0281|Chr1:102817129_102818162_-	0	0	0	0	0	0	0	0	4	0	2	0
circRNA_0282|Chr1:102817129_102819408_-	0	0	0	0	0	0	2	0	0	0	0	0
circRNA_0283|Chr1:102942470_102959692_-	0	0	0	0	3	0	0	0	0	0	0	0
circRNA_0284|Chr1:104117833_104125130_+	0	0	0	0	0	0	0	0	0	0	0	2
circRNA_0285|Chr1:104696204_104706598_+	0	0	0	0	2	0	0	0	0	0	0	0
circRNA_0286|Chr1:104696204_104750940_+	0	0	0	0	2	0	0	0	0	0	0	0
circRNA_0287|Chr1:104785950_104795565_+	0	0	0	2	0	0	0	0	0	0	0	0
circRNA_0288|Chr1:104792188_104795565_+	0	0	0	0	0	2	0	0	0	0	0	0
circRNA_0289|Chr1:104792188_104821976_+	8	0	0	6	2	6	7	6	3	8	9	0
circRNA_0290|Chr1:104793271_104795565_+	0	0	3	0	0	3	2	0	3	0	0	0
circRNA_0291|Chr1:104908967_104916100_+	0	0	0	0	4	2	2	0	0	2	0	0
circRNA_0292|Chr1:104908967_104918260_+	0	0	0	0	2	0	0	0	0	0	0	0
circRNA_0293|Chr1:107253894_107320767_+	0	2	2	0	0	0	0	0	0	0	0	0
circRNA_0294|Chr1:107263212_107320767_+	2	0	0	0	0	0	0	2	0	0	0	0
circRNA_0295|Chr1:114304821_114311513_+	7	5	5	5	8	9	14	10	13	12	11	5
circRNA_0296|Chr1:114597220_114599418_+	0	0	3	0	0	2	0	5	5	0	3	3
circRNA_0297|Chr1:114763919_114769077_+	0	0	0	0	0	0	0	2	0	0	0	0
circRNA_0298|Chr1:114763919_114799681_+	0	0	0	0	0	0	0	0	0	0	2	0
circRNA_0299|Chr1:114773002_114799681_+	0	0	0	0	0	0	4	0	0	0	0	0
circRNA_0300|Chr1:114863121_114880161_+	0	0	0	0	0	0	0	0	0	0	2	0
circRNA_0301|Chr1:116101208_116122945_+	0	0	0	0	0	2	0	0	0	0	0	0
circRNA_0302|Chr1:116101208_116140446_+	0	0	0	2	0	0	0	0	0	0	0	0
circRNA_0303|Chr1:116593695_116610544_+	3	2	3	2	0	0	2	0	0	0	0	2
circRNA_0304|Chr1:116604549_116610544_+	10	7	10	8	10	11	7	6	13	10	13	8
circRNA_0305|Chr1:116604549_116648907_+	0	0	2	0	0	0	0	0	0	0	0	0
circRNA_0306|Chr1:116643750_116660509_+	2	3	3	0	0	4	0	3	3	0	0	2
circRNA_0307|Chr1:116751337_116754636_-	0	0	0	0	0	0	0	0	0	2	0	0
circRNA_0308|Chr1:121281853_121293097_-	0	0	0	0	0	0	0	0	0	5	0	2
circRNA_0309|Chr1:122605870_122678378_-	0	7	5	5	2	6	3	0	8	17	6	5
circRNA_0310|Chr1:122613645_122680102_-	0	4	4	0	0	0	0	0	5	0	0	0
circRNA_0311|Chr1:122799692_122845719_-	0	0	0	0	0	0	0	0	3	0	0	0
circRNA_0312|Chr1:124508122_124543680_+	0	0	0	0	0	0	0	0	0	2	0	0
circRNA_0313|Chr1:125135342_125151462_+	2	0	0	0	0	3	3	2	0	0	0	2
circRNA_0314|Chr1:125135342_125157895_+	0	0	0	0	0	0	0	0	0	0	0	3
circRNA_0315|Chr1:126188351_126195625_-	2	4	0	2	0	7	0	3	6	0	4	5
circRNA_0316|Chr1:126192619_126195625_-	2	0	0	0	0	0	2	0	0	0	0	2
circRNA_0317|Chr1:126573474_126583015_+	114	33	54	43	74	48	50	41	57	41	37	39
circRNA_0318|Chr1:126819845_126824250_+	0	0	0	0	0	0	0	2	2	0	0	0
circRNA_0319|Chr1:127025462_127025957_+	16	11	13	13	17	11	18	14	8	16	10	8
circRNA_0320|Chr1:127301950_127302108_+	0	0	0	0	0	2	0	0	0	2	0	0
circRNA_0321|Chr1:127881908_127887913_+	0	3	2	0	0	0	0	0	6	8	0	5
circRNA_0322|Chr1:128226644_128243030_-	3	0	0	0	0	0	0	0	0	0	2	0
circRNA_0323|Chr1:128239552_128242835_-	2	0	2	8	0	6	0	2	8	5	2	4
circRNA_0324|Chr1:128239552_128243030_-	21	9	11	17	26	20	26	16	13	26	25	25
circRNA_0325|Chr1:128267052_128287291_-	0	0	0	0	0	2	0	2	0	0	0	0
circRNA_0326|Chr1:128501692_128503937_-	0	0	0	0	0	0	0	0	0	2	0	0
circRNA_0327|Chr1:128501692_128513631_-	0	0	0	0	0	0	0	0	0	2	0	0
circRNA_0328|Chr1:128501692_128526760_-	8	0	0	0	0	4	3	0	2	0	0	0
circRNA_0329|Chr1:128501692_128526855_-	4	0	0	4	0	3	2	0	0	3	0	2
circRNA_0330|Chr1:128513529_128576607_-	0	0	0	0	0	0	0	0	2	0	0	0
circRNA_0331|Chr1:128526649_128576607_-	0	0	0	0	2	0	0	0	0	0	0	0
circRNA_0332|Chr1:128621052_128628362_+	2	0	0	0	0	0	0	0	0	0	0	0
circRNA_0333|Chr1:128621052_128637195_+	2	0	2	0	0	0	3	3	0	0	0	0
circRNA_0334|Chr1:128625388_128628362_+	0	0	0	0	2	0	0	0	0	0	2	0
circRNA_0335|Chr1:128625388_128637195_+	0	0	0	0	0	0	0	2	0	0	0	0
circRNA_0336|Chr1:128978104_128978649_+	5	0	4	2	5	4	4	3	0	4	4	2
circRNA_0337|Chr1:129142521_129149837_+	0	0	2	3	0	2	0	3	0	0	0	0
circRNA_0338|Chr1:131482492_131484841_+	0	0	2	0	0	2	0	0	3	3	0	0
circRNA_0339|Chr1:133353419_133411282_-	0	0	0	0	2	0	0	0	0	0	0	0
circRNA_0340|Chr1:133407797_133411282_-	0	0	0	0	0	0	0	0	0	0	2	0
circRNA_0341|Chr1:133407797_133451349_-	0	4	2	2	3	10	7	7	2	2	3	9
circRNA_0342|Chr1:133431494_133451349_-	0	0	0	0	2	0	0	0	0	0	0	2
circRNA_0343|Chr1:133448752_133462521_-	0	0	0	0	0	0	4	0	2	2	0	0
circRNA_0344|Chr1:134794264_134811320_-	0	0	2	0	0	0	0	0	0	0	2	0
circRNA_0345|Chr1:134799596_134811320_-	0	2	0	0	0	0	0	0	0	0	2	0
circRNA_0346|Chr1:134817263_134823065_-	0	0	0	2	0	0	2	0	0	0	0	0
circRNA_0347|Chr1:134837853_134848903_-	0	0	0	0	2	0	0	0	0	0	0	0
circRNA_0348|Chr1:134843160_134848903_-	3	4	7	7	8	8	8	4	2	3	2	5
circRNA_0349|Chr1:135860270_135871550_-	2	0	0	3	2	0	0	0	0	0	0	0
circRNA_0350|Chr1:136017017_136017482_-	2	0	0	0	0	0	0	0	0	0	0	0
circRNA_0351|Chr1:137173179_137179777_+	4	0	2	0	0	0	0	5	0	0	0	0
circRNA_0352|Chr1:137245319_137264458_+	0	0	0	2	0	0	0	0	0	0	0	0
circRNA_0353|Chr1:137247124_137255698_+	0	0	2	0	2	0	2	0	0	2	0	0
circRNA_0354|Chr1:137247124_137257406_+	3	0	3	0	2	4	3	2	0	0	0	2
circRNA_0355|Chr1:137247124_137264458_+	8	3	5	12	5	6	11	6	5	12	8	5
circRNA_0356|Chr1:137247124_137280380_+	0	0	0	2	0	0	0	0	2	0	0	0
circRNA_0357|Chr1:137247124_137296230_+	0	0	0	2	0	0	3	2	0	3	0	0
circRNA_0358|Chr1:137255656_137264458_+	0	0	0	0	0	0	0	0	0	2	0	0
circRNA_0359|Chr1:139943398_139956356_-	7	16	15	17	15	34	14	17	13	15	28	23
circRNA_0360|Chr1:139943398_139956910_-	0	0	0	0	0	2	3	0	0	0	0	0
circRNA_0361|Chr1:140044382_140046340_-	0	0	0	0	0	0	0	0	0	0	2	0
circRNA_0362|Chr1:140044382_140134063_-	0	0	0	0	0	0	0	0	0	0	2	0
circRNA_0363|Chr1:140044382_140142798_-	0	0	2	0	2	4	3	0	0	0	3	0
circRNA_0364|Chr1:140131618_140134063_-	0	0	0	0	0	3	0	0	0	0	0	3
circRNA_0365|Chr1:140131618_140140461_-	0	0	0	2	0	0	0	0	0	2	2	0
circRNA_0366|Chr1:140131618_140142798_-	5	2	0	6	3	11	10	8	0	5	8	5
circRNA_0367|Chr1:140131618_140158228_-	6	5	5	9	10	9	6	6	4	4	12	5
circRNA_0368|Chr1:140131618_140158785_-	0	0	0	0	0	0	0	0	0	0	2	0
circRNA_0369|Chr1:140475833_140476005_-	0	0	3	0	0	0	0	0	0	0	0	0
circRNA_0370|Chr1:140845573_140845761_+	0	0	0	0	2	0	0	0	0	0	0	0
circRNA_0371|Chr1:141024396_141026781_+	0	0	0	0	0	0	2	3	0	0	0	3
circRNA_0372|Chr1:141641684_141655417_-	0	0	0	2	0	0	0	0	0	0	0	0
circRNA_0373|Chr1:141877382_141880461_-	0	0	0	8	0	0	5	2	2	0	2	3
circRNA_0374|Chr1:142003533_142005043_+	0	0	0	2	0	0	0	0	0	0	0	0
circRNA_0375|Chr1:142144299_142145818_+	0	0	0	0	0	0	0	0	0	0	0	2
circRNA_0376|Chr1:142160925_142161359_-	0	0	0	2	3	5	7	0	4	0	0	0
circRNA_0377|Chr1:142191060_142191760_-	0	0	0	0	0	0	0	0	2	0	0	0
circRNA_0378|Chr1:142191060_142192744_-	0	0	0	0	0	0	0	0	0	0	2	0
circRNA_0379|Chr1:142192435_142194379_-	3	0	0	0	0	0	0	0	0	0	0	0
circRNA_0380|Chr1:142410486_142422420_-	0	0	0	0	0	4	2	0	0	0	0	0
circRNA_0381|Chr1:142429023_142442406_-	3	0	0	0	3	2	0	2	0	0	0	5
circRNA_0382|Chr1:142556681_142565170_-	0	0	0	0	0	2	0	0	0	0	0	0
circRNA_0383|Chr1:142682098_142682602_+	0	0	0	0	0	0	0	0	0	3	0	0
circRNA_0384|Chr1:142718407_142719095_-	0	0	0	0	0	0	0	2	0	0	0	0
circRNA_0385|Chr1:142733786_142740091_-	2	2	0	0	0	0	0	2	0	2	0	0
circRNA_0386|Chr1:142744886_142750856_-	2	0	0	3	0	0	0	0	0	0	2	0
circRNA_0387|Chr1:142834163_142852148_+	0	0	0	0	3	0	0	0	0	0	0	0
circRNA_0388|Chr1:142849916_142852148_+	5	4	6	5	5	15	8	9	6	5	9	8
circRNA_0389|Chr1:143107055_143109260_+	4	3	4	2	4	3	9	3	5	5	0	5
circRNA_0390|Chr1:143107055_143121105_+	0	0	0	3	0	0	0	0	0	0	0	3
circRNA_0391|Chr1:143107055_143140766_+	0	0	0	0	7	0	0	0	0	0	0	0
circRNA_0392|Chr1:143143055_143143524_+	6	7	5	5	5	10	6	13	3	11	7	4
circRNA_0393|Chr1:143417972_143419383_+	0	0	2	0	0	0	0	0	0	0	0	0
circRNA_0394|Chr1:143712491_143718900_-	0	0	0	0	0	0	0	2	0	0	2	0
circRNA_0395|Chr1:143712491_143723739_-	2	7	7	4	7	5	3	4	2	5	2	6
circRNA_0396|Chr1:144448986_144457102_+	0	0	0	0	0	3	0	0	0	0	0	0
circRNA_0397|Chr1:144463965_144495637_+	0	0	2	0	0	0	0	0	0	0	3	0
circRNA_0398|Chr1:144485179_144495637_+	0	2	0	0	2	0	0	0	0	0	0	0
circRNA_0399|Chr1:144610819_144627268_+	0	0	0	0	2	0	0	0	0	0	0	0
circRNA_0400|Chr1:144710109_144726484_+	0	0	0	0	0	0	0	2	0	0	0	0
circRNA_0401|Chr1:145821357_145826632_-	0	0	0	0	0	0	3	0	0	0	0	0
circRNA_0402|Chr1:146080216_146080681_-	0	0	0	0	0	0	0	0	0	0	0	2
circRNA_0403|Chr1:148425541_148428477_-	2	0	0	2	0	0	0	0	0	0	0	2
circRNA_0404|Chr1:150830996_150846872_+	19	14	8	30	30	35	33	20	18	21	20	34
circRNA_0405|Chr1:150830996_150862009_+	2	0	0	0	0	0	0	0	0	0	0	0
circRNA_0406|Chr1:150830996_150866642_+	0	0	0	0	0	4	2	2	0	2	3	0
circRNA_0407|Chr1:150830996_150873583_+	0	0	0	0	0	4	0	0	0	0	3	0
circRNA_0408|Chr1:150830996_150887461_+	7	5	0	6	5	7	8	9	3	3	6	11
circRNA_0409|Chr1:150831000_150846872_+	0	0	3	2	2	5	6	2	0	0	3	3
circRNA_0410|Chr1:150831000_150866642_+	0	0	0	0	0	0	2	0	2	0	0	0
circRNA_0411|Chr1:150831000_150887461_+	2	0	0	3	2	0	2	0	0	2	0	2
circRNA_0412|Chr1:150844980_150887461_+	0	0	0	0	0	0	0	0	0	0	0	2
circRNA_0413|Chr1:150861937_150873583_+	0	0	0	0	2	0	0	0	4	0	0	0
circRNA_0414|Chr1:150861937_150887461_+	9	3	0	7	3	7	6	6	4	4	7	12
circRNA_0415|Chr1:150861937_150961642_+	0	0	0	0	0	0	2	0	0	0	0	0
circRNA_0416|Chr1:150866562_150887461_+	0	0	0	2	0	0	0	0	0	0	0	0
circRNA_0417|Chr1:150871108_150887461_+	5	5	0	4	4	9	2	4	2	6	3	8
circRNA_0418|Chr1:150873221_150887461_+	3	0	0	0	9	0	6	2	2	0	0	4
circRNA_0419|Chr1:150887401_150957355_+	3	0	0	0	0	0	0	0	0	0	0	0
circRNA_0420|Chr1:150887401_150961642_+	20	6	8	11	21	31	19	16	12	12	22	24
circRNA_0421|Chr1:150937283_150961642_+	3	0	3	3	7	5	7	2	4	5	3	7
circRNA_0422|Chr1:150955058_150961642_+	0	0	0	0	0	2	0	0	0	0	0	0
circRNA_0423|Chr1:152902904_152910824_-	7	2	2	0	4	0	2	4	0	2	0	0
circRNA_0424|Chr1:154147196_154152113_-	0	0	0	0	0	0	0	2	0	0	0	0
circRNA_0425|Chr1:154405931_154406882_+	0	0	2	0	0	0	0	0	0	0	0	0
circRNA_0426|Chr1:154405931_154411147_+	0	0	0	0	0	2	0	0	0	2	4	0
circRNA_0427|Chr1:154405931_154416574_+	0	0	0	0	0	0	0	2	0	0	0	0
circRNA_0428|Chr1:154405931_154418787_+	0	0	0	0	0	0	2	0	0	2	0	0
circRNA_0429|Chr1:154405931_154425509_+	7	2	0	6	5	3	6	0	0	3	2	2
circRNA_0430|Chr1:154405931_154447475_+	9	2	0	6	7	12	3	8	4	3	2	5
circRNA_0431|Chr1:154406807_154418787_+	0	0	2	0	2	4	5	0	4	2	0	0
circRNA_0432|Chr1:154411045_154425509_+	0	0	0	0	0	0	2	0	0	0	0	0
circRNA_0433|Chr1:154439745_154442136_+	0	0	0	0	0	0	0	0	0	2	0	0
circRNA_0434|Chr1:154439745_154446214_+	0	0	0	0	0	0	2	0	0	0	0	0
circRNA_0435|Chr1:154439745_154447475_+	2	4	3	2	0	6	4	2	0	5	0	2
circRNA_0436|Chr1:154458094_154458284_+	0	0	0	0	0	0	0	0	0	2	0	0
circRNA_0437|Chr1:157422218_157440238_-	0	0	0	2	6	0	0	0	0	3	0	0
circRNA_0438|Chr1:157422218_157444997_-	0	0	0	0	0	0	0	2	0	0	0	0
circRNA_0439|Chr1:157431093_157440238_-	0	0	2	0	0	0	0	0	0	0	0	0
circRNA_0440|Chr1:157470071_157490006_-	4	0	0	0	0	0	0	2	0	2	2	0
circRNA_0441|Chr1:157646235_157659725_+	0	0	0	0	0	0	0	0	0	0	2	0
circRNA_0442|Chr1:161321879_161328848_+	0	0	0	0	0	0	0	2	0	0	0	0
circRNA_0443|Chr1:161679897_161714217_+	3	0	0	0	0	0	2	0	0	0	0	0
circRNA_0444|Chr1:161705913_161714217_+	2	0	0	0	0	0	0	0	0	0	0	0
circRNA_0445|Chr1:161746439_161752409_+	0	0	0	0	2	0	0	0	0	0	2	0
circRNA_0446|Chr1:161928871_161932898_+	0	2	2	2	6	5	4	2	5	3	3	3
circRNA_0447|Chr1:161988635_162006381_+	2	0	2	0	0	0	2	0	0	2	0	0
circRNA_0448|Chr1:162381656_162381997_+	4	0	0	0	0	0	0	0	0	0	0	0
circRNA_0449|Chr1:162381969_162385159_-	0	0	0	0	0	0	0	2	0	0	0	0
circRNA_0450|Chr1:162451867_162454337_+	4	0	0	0	0	0	2	4	0	0	4	0
circRNA_0451|Chr1:162498952_162500639_+	2	0	0	0	0	0	0	0	0	0	0	0
circRNA_0452|Chr1:162684057_162691242_+	2	0	0	3	0	6	0	3	0	2	2	0
circRNA_0453|Chr1:162684057_162693129_+	0	0	0	0	0	0	0	0	0	0	2	0
circRNA_0454|Chr1:162684057_162693133_+	0	0	3	0	0	0	0	0	0	0	0	0
circRNA_0455|Chr1:162684057_162693207_+	0	0	0	0	0	0	3	0	0	0	0	0
circRNA_0456|Chr1:162684057_162696070_+	0	0	0	3	0	0	0	3	2	0	2	0
circRNA_0457|Chr1:162688794_162693129_+	0	0	0	2	2	0	2	0	0	0	2	0
circRNA_0458|Chr1:162688794_162693133_+	0	0	0	0	0	0	2	3	0	2	0	0
circRNA_0459|Chr1:162688794_162696070_+	6	0	3	3	3	5	3	3	4	0	0	2
circRNA_0460|Chr1:162689674_162696070_+	0	0	0	0	0	0	0	2	0	0	0	0
circRNA_0461|Chr1:163182618_163216364_-	5	3	0	2	5	2	14	6	4	8	0	6
circRNA_0462|Chr1:163203870_163216364_-	12	0	10	0	2	3	3	8	2	12	19	5
circRNA_0463|Chr1:163566851_163569613_-	0	0	0	0	4	0	0	0	0	0	0	0
circRNA_0464|Chr1:163938955_163976846_-	3	0	0	0	0	0	0	0	0	0	0	0
circRNA_0465|Chr1:163965001_163976846_-	2	0	0	0	0	0	0	0	2	0	0	0
circRNA_0466|Chr1:164025518_164055455_-	0	0	0	0	2	0	0	3	0	3	0	0
circRNA_0467|Chr1:164025518_164064815_-	13	9	9	19	13	17	19	15	18	19	19	17
circRNA_0468|Chr1:164046102_164055455_-	0	0	0	0	0	0	2	0	0	0	0	0
circRNA_0469|Chr1:164046102_164064815_-	18	8	8	13	12	13	9	9	8	7	10	12
circRNA_0470|Chr1:164367968_164380890_+	0	0	0	0	2	0	0	0	2	0	0	0
circRNA_0471|Chr1:164931730_164947123_-	19	15	12	10	14	17	21	15	10	15	16	18
circRNA_0472|Chr1:164931730_164958663_-	0	0	0	0	0	0	2	0	0	0	0	0
circRNA_0473|Chr1:165261342_165266561_+	0	0	0	0	0	0	0	0	0	0	2	0
circRNA_0474|Chr1:165315152_165325581_+	0	0	0	0	0	0	2	0	0	0	0	0
circRNA_0475|Chr1:165340205_165354415_-	0	0	0	0	0	0	0	0	0	2	0	0
circRNA_0476|Chr1:165366392_165367044_-	4	5	2	5	0	4	3	2	2	2	0	2
circRNA_0477|Chr1:165414771_165415667_+	5	6	8	6	2	7	5	5	9	8	5	4
circRNA_0478|Chr1:165646261_165654319_+	17	9	9	17	19	9	22	23	17	17	23	10
circRNA_0479|Chr1:166208849_166259335_+	0	3	3	2	0	7	7	6	0	2	4	4
circRNA_0480|Chr1:166231693_166259335_+	0	2	2	3	3	0	0	3	0	2	2	4
circRNA_0481|Chr1:166257537_166259335_+	0	0	0	0	0	0	0	0	0	0	0	2
circRNA_0482|Chr1:166342480_166353529_+	0	0	0	0	0	0	0	0	0	0	0	2
circRNA_0483|Chr1:166342480_166368428_+	0	0	3	2	2	0	4	3	0	0	0	0
circRNA_0484|Chr1:166351174_166368428_+	3	6	14	13	10	15	8	11	11	11	21	14
circRNA_0485|Chr1:166351174_166378796_+	2	0	0	5	0	2	0	0	0	0	4	5
circRNA_0486|Chr1:166378662_166385907_+	9	3	8	14	11	8	13	8	8	5	6	7
circRNA_0487|Chr1:166383828_166385907_+	0	0	0	0	0	2	0	0	0	0	0	0
circRNA_0488|Chr1:166478004_166485185_+	0	2	0	0	0	2	3	0	2	3	0	0
circRNA_0489|Chr1:167084126_167084563_-	0	0	0	0	2	3	6	2	0	0	0	0
circRNA_0490|Chr1:167235715_167236144_-	2	0	0	0	0	0	0	0	0	0	0	0
circRNA_0491|Chr1:167254585_167276543_-	0	0	0	0	0	0	0	0	0	0	2	0
circRNA_0492|Chr1:167260358_167269761_-	0	0	0	0	0	0	0	3	2	0	0	0
circRNA_0493|Chr1:167260358_167276543_-	0	0	0	0	0	2	0	0	0	0	0	0
circRNA_0494|Chr1:167546833_167550581_+	0	0	0	0	0	2	0	0	0	0	0	0
circRNA_0495|Chr1:168952768_168957939_+	0	0	0	5	0	0	6	0	0	0	0	0
circRNA_0496|Chr1:168952768_168964665_+	0	0	6	0	0	0	0	0	0	9	2	3
circRNA_0497|Chr1:168958579_168964665_+	42	54	0	0	0	0	0	85	0	0	0	64
circRNA_0498|Chr1:169534353_169534828_-	4	2	0	3	0	0	2	0	0	0	0	2
circRNA_0499|Chr1:170426915_170427523_-	0	0	0	0	0	0	2	0	0	0	0	0
circRNA_0500|Chr1:170450030_170450980_-	2	2	0	2	5	0	3	2	2	3	3	2
circRNA_0501|Chr1:171715869_171720495_+	0	0	2	0	0	0	0	2	0	0	0	0
circRNA_0502|Chr1:174144381_174148738_-	0	0	0	0	0	0	0	0	0	0	2	0
circRNA_0503|Chr1:174165890_174174250_-	3	0	4	6	3	0	5	5	0	3	0	0
circRNA_0504|Chr1:174173000_174174250_-	0	0	0	2	0	0	0	0	0	0	0	3
circRNA_0505|Chr1:174233565_174234408_-	0	0	0	0	0	0	0	0	0	2	0	0
circRNA_0506|Chr1:174527904_174529818_-	0	0	0	0	0	3	0	0	0	0	0	2
circRNA_0507|Chr1:174530992_174556451_-	0	0	0	0	0	0	0	0	0	0	0	2
circRNA_0508|Chr1:174609600_174613577_-	10	12	7	5	6	12	14	9	7	9	14	12
circRNA_0509|Chr1:174609600_174615437_-	0	0	0	2	0	0	0	0	0	0	0	0
circRNA_0510|Chr1:174663805_174673389_+	2	0	0	0	0	0	0	0	0	2	0	0
circRNA_0511|Chr1:174666652_174668450_+	3	0	0	0	2	3	3	0	0	0	0	5
circRNA_0512|Chr1:174770213_174772363_+	3	0	0	0	0	0	0	0	0	2	0	0
circRNA_0513|Chr1:174771333_174772363_+	0	0	2	0	0	4	0	0	0	0	0	0
circRNA_0514|Chr1:174772242_174778064_+	0	0	0	0	0	3	0	2	0	0	0	0
circRNA_0515|Chr1:174775382_174778064_+	0	0	0	0	0	0	0	0	3	0	0	0
circRNA_0516|Chr1:174961496_174976220_-	0	0	0	3	0	0	3	0	0	0	0	0
circRNA_0517|Chr1:174970502_174971441_-	0	0	0	0	0	0	0	2	2	0	0	2
circRNA_0518|Chr1:175005900_175011736_-	0	0	0	2	0	0	0	0	0	0	0	0
circRNA_0519|Chr1:175171303_175202232_-	0	0	2	0	0	0	2	0	0	0	0	0
circRNA_0520|Chr1:175171303_175218889_-	0	0	3	0	0	0	3	0	2	2	4	2
circRNA_0521|Chr1:175200414_175218889_-	3	0	0	5	3	0	3	4	3	4	5	3
circRNA_0522|Chr1:175200414_175225323_-	0	0	0	0	0	0	0	0	0	4	0	0
circRNA_0523|Chr1:175225210_175284224_-	0	0	2	4	0	2	2	0	2	2	0	0
circRNA_0524|Chr1:175246617_175284224_-	2	0	0	0	0	0	0	0	0	0	0	0
circRNA_0525|Chr1:175252582_175284224_-	4	3	0	3	3	4	4	3	5	2	0	4
circRNA_0526|Chr1:175646900_175650721_-	0	0	0	3	0	3	0	0	3	2	3	0
circRNA_0527|Chr1:175700307_175720685_-	0	0	0	0	0	0	0	3	0	2	0	3
circRNA_0528|Chr1:175714102_175714982_-	0	0	3	4	2	4	4	5	0	4	0	7
circRNA_0529|Chr1:175736190_175739301_-	0	0	0	0	0	0	2	0	0	0	0	0
circRNA_0530|Chr1:175761950_175762098_-	0	0	0	0	0	0	2	0	0	0	0	0
circRNA_0531|Chr1:176334639_176346651_-	0	2	0	0	0	0	0	0	0	0	0	0
circRNA_0532|Chr1:176886373_176895621_+	0	0	0	0	0	0	0	0	0	0	0	2
circRNA_0533|Chr1:176944614_176947928_-	0	2	0	0	0	0	0	0	0	0	0	0
circRNA_0534|Chr1:177123077_177130995_+	0	0	0	0	0	3	3	2	2	0	0	0
circRNA_0535|Chr1:177123077_177135239_+	0	2	0	0	0	3	0	0	0	0	0	0
circRNA_0536|Chr1:177129021_177130995_+	2	0	0	0	0	4	0	0	0	2	0	3
circRNA_0537|Chr1:177129021_177150802_+	0	0	0	0	0	0	0	0	0	2	0	0
circRNA_0538|Chr1:177129021_177166327_+	2	0	0	0	0	0	0	0	0	0	0	0
circRNA_0539|Chr1:177360220_177364974_+	0	0	0	0	0	0	0	0	0	2	0	0
circRNA_0540|Chr1:177360220_177377649_+	2	0	0	2	0	0	2	0	0	0	0	0
circRNA_0541|Chr1:177389638_177397572_+	0	0	3	3	3	2	4	3	5	0	3	3
circRNA_0542|Chr1:177391988_177397572_+	0	0	2	0	0	0	0	2	0	0	0	0
circRNA_0543|Chr1:177521072_177569872_+	2	2	2	0	0	0	4	3	0	4	2	2
circRNA_0544|Chr1:177524504_177569872_+	0	0	0	0	0	0	0	0	0	0	0	3
circRNA_0545|Chr1:177569617_177569872_+	0	2	0	0	0	2	4	4	0	2	4	0
circRNA_0546|Chr1:177651557_177654228_+	0	0	0	0	0	0	0	2	0	0	0	0
circRNA_0547|Chr1:178139196_178157418_-	0	0	0	0	0	0	0	0	0	0	0	3
circRNA_0548|Chr1:178150980_178173454_-	2	0	0	0	0	0	0	0	0	0	0	0
circRNA_0549|Chr1:178927608_178927790_+	0	0	0	0	0	4	0	0	0	0	0	0
circRNA_0550|Chr1:178941217_178955232_-	0	0	0	0	0	0	0	2	2	2	0	0
circRNA_0551|Chr1:178953396_178955232_-	5	0	0	0	0	0	2	0	0	2	2	2
circRNA_0552|Chr1:183706495_183711730_-	0	0	0	0	0	0	0	0	2	0	0	0
circRNA_0553|Chr1:184008119_184017761_+	9	4	8	5	9	4	16	10	9	12	4	0
circRNA_0554|Chr1:184008119_184042715_+	7	2	6	2	3	0	0	5	9	13	6	2
circRNA_0555|Chr1:184008119_184055555_+	0	2	2	0	3	0	0	0	0	0	0	2
circRNA_0556|Chr1:184008119_184061174_+	0	0	0	0	0	0	3	0	0	0	0	3
circRNA_0557|Chr1:184041764_184042715_+	3	0	2	0	0	0	0	0	0	2	0	0
circRNA_0558|Chr1:184041764_184055555_+	6	0	8	0	6	3	4	8	0	4	0	0
circRNA_0559|Chr1:184041764_184061174_+	8	2	4	0	4	3	2	3	2	6	0	0
circRNA_0560|Chr1:184041764_184077314_+	0	0	0	3	0	0	0	0	0	0	0	0
circRNA_0561|Chr1:184050399_184061174_+	0	0	0	0	0	0	0	0	0	2	0	0
circRNA_0562|Chr1:184324945_184369973_+	0	0	0	0	0	0	2	0	0	0	0	0
circRNA_0563|Chr1:184349539_184363933_+	2	0	0	0	0	0	0	0	0	0	0	0
circRNA_0564|Chr1:184349539_184369973_+	0	0	0	0	0	0	0	0	0	0	2	0
circRNA_0565|Chr1:184823506_184829165_-	0	0	0	0	2	0	0	0	0	0	0	0
circRNA_0566|Chr1:185233419_185234547_+	5	0	0	0	0	4	2	2	4	3	0	2
circRNA_0567|Chr1:185233419_185252682_+	0	0	0	0	0	2	0	0	0	0	0	0
circRNA_0568|Chr1:185261106_185264972_+	0	0	2	0	0	0	0	0	0	2	0	0
circRNA_0569|Chr1:185261106_185267832_+	0	0	0	2	6	8	7	3	5	4	4	5
circRNA_0570|Chr1:185261106_185289592_+	0	0	0	0	0	0	0	0	3	0	0	0
circRNA_0571|Chr1:185261106_185291713_+	0	0	0	0	0	0	0	0	0	0	3	0
circRNA_0572|Chr1:185263914_185267832_+	7	6	7	10	14	14	11	5	9	12	12	12
circRNA_0573|Chr1:185263914_185297636_+	0	0	3	4	0	3	0	2	0	3	0	2
circRNA_0574|Chr1:185298317_185307538_+	0	0	0	2	0	0	0	0	0	0	0	0
circRNA_0575|Chr1:185306404_185307538_+	3	2	0	2	2	4	0	0	0	2	2	0
circRNA_0576|Chr1:185495031_185495489_+	0	2	0	0	0	0	0	0	0	0	0	0
circRNA_0577|Chr1:185722677_185724996_+	0	0	0	6	9	2	4	0	5	2	0	6
circRNA_0578|Chr1:185871416_185879063_+	0	0	0	0	0	0	0	0	0	0	2	0
circRNA_0579|Chr1:185878823_185902595_+	0	0	0	0	0	2	2	0	0	3	0	2
circRNA_0580|Chr1:186006551_186009525_+	0	2	0	0	2	0	3	0	3	0	4	2
circRNA_0581|Chr1:186006551_186068045_+	0	0	0	2	0	6	0	0	0	0	0	0
circRNA_0582|Chr1:186067925_186079314_+	0	0	0	0	0	0	0	0	2	0	0	0
circRNA_0583|Chr1:186077651_186114868_+	2	0	3	0	2	0	0	2	0	0	0	0
circRNA_0584|Chr1:187776387_187777086_-	0	0	0	3	0	2	0	0	2	0	3	0
circRNA_0585|Chr1:188436736_188437895_+	0	0	0	2	0	2	3	0	0	2	0	0
circRNA_0586|Chr1:188461652_188474662_+	0	0	0	0	0	0	0	0	0	0	0	2
circRNA_0587|Chr1:188481301_188483565_+	0	0	0	0	0	0	0	0	2	2	0	0
circRNA_0588|Chr1:188510274_188516444_+	0	0	2	2	0	0	3	5	0	3	4	3
circRNA_0589|Chr1:188510274_188530025_+	5	0	0	0	3	3	3	2	0	3	5	6
circRNA_0590|Chr1:188510274_188544229_+	0	0	0	0	0	0	3	0	0	0	0	0
circRNA_0591|Chr1:188516330_188544229_+	0	0	0	0	0	0	0	2	0	0	0	2
circRNA_0592|Chr1:189560181_189595749_+	0	0	0	2	0	0	0	0	0	0	0	0
circRNA_0593|Chr1:189581794_189597354_+	0	3	0	0	0	0	0	0	0	0	0	2
circRNA_0594|Chr1:189883203_189883990_+	0	0	0	0	0	0	2	0	0	2	0	0
circRNA_0595|Chr1:190557651_190560195_+	0	0	0	3	2	0	0	0	0	0	0	0
circRNA_0596|Chr1:190820042_190824326_+	5	0	0	0	0	0	0	0	0	0	0	2
circRNA_0597|Chr1:190824177_190826502_+	0	0	0	0	0	2	0	0	0	2	0	0
circRNA_0598|Chr1:190824177_190827753_+	0	0	0	0	0	0	0	0	0	0	0	2
circRNA_0599|Chr1:190834494_190836738_+	0	0	0	0	0	0	0	0	0	0	4	0
circRNA_0600|Chr1:190857743_190863737_+	0	0	0	0	0	0	0	0	0	0	2	2
circRNA_0601|Chr1:190978132_190991049_+	0	0	0	0	0	0	0	0	0	2	0	0
circRNA_0602|Chr1:190980864_190985358_+	2	2	0	0	0	0	0	0	0	4	0	0
circRNA_0603|Chr1:190980864_190991049_+	38	14	53	38	34	26	42	56	41	63	61	39
circRNA_0604|Chr1:190980864_190993304_+	2	0	0	0	0	0	0	0	0	0	0	0
circRNA_0605|Chr1:190980864_190997237_+	0	0	0	0	0	0	2	0	0	0	0	0
circRNA_0606|Chr1:190985149_190991049_+	0	0	0	0	0	0	0	0	0	0	0	2
circRNA_0607|Chr1:192938631_192948640_+	0	0	0	0	0	5	0	0	0	0	0	0
circRNA_0608|Chr1:192952650_192953216_+	2	3	3	3	2	4	7	2	0	0	5	4
circRNA_0609|Chr1:192952650_192955267_+	13	17	14	15	8	14	11	11	13	22	12	18
circRNA_0610|Chr1:193104517_193114307_+	4	0	0	2	0	0	3	2	2	2	0	0
circRNA_0611|Chr1:193255702_193268499_-	2	0	0	0	0	0	4	0	0	2	2	0
circRNA_0612|Chr1:194850656_194917768_-	0	9	0	0	0	0	0	0	0	16	0	0
circRNA_0613|Chr1:194853235_194917768_-	0	0	0	2	0	0	0	0	0	0	0	0
circRNA_0614|Chr1:194855422_194917768_-	0	0	0	0	8	0	2	0	5	0	0	0
circRNA_0615|Chr1:194864350_194917768_-	6	0	0	0	0	0	0	0	0	0	0	0
circRNA_0616|Chr1:194892470_194917768_-	0	0	0	0	0	0	0	0	0	2	0	0
circRNA_0617|Chr1:194917622_194917768_-	16	12	0	0	0	0	0	0	0	0	0	0
circRNA_0618|Chr1:194917622_194924798_-	0	0	0	0	12	0	0	0	0	0	0	0
circRNA_0619|Chr1:197067160_197069686_-	0	0	0	0	0	0	0	0	2	0	0	0
circRNA_0620|Chr1:197526940_197545868_-	0	0	0	0	0	0	0	0	3	3	0	0
circRNA_0621|Chr1:197526940_197549861_-	0	0	0	0	0	3	2	0	0	2	0	0
circRNA_0622|Chr1:197545742_197549861_-	0	0	0	0	0	0	0	2	0	0	0	2
circRNA_0623|Chr1:197981834_197983786_-	15	0	11	4	4	3	4	3	8	2	0	11
circRNA_0624|Chr1:197981834_197983858_-	5	0	2	0	6	0	4	0	0	2	0	0
circRNA_0625|Chr1:198083608_198092734_+	0	0	0	0	0	0	0	0	2	0	0	0
circRNA_0626|Chr1:198089445_198092734_+	0	0	0	0	0	4	0	0	0	0	0	0
circRNA_0627|Chr1:198429807_198432232_-	4	0	4	4	0	6	6	5	4	3	7	0
circRNA_0628|Chr1:198431867_198432232_-	0	0	0	0	0	0	0	0	2	0	0	0
circRNA_0629|Chr1:198932174_198934500_+	0	0	2	2	0	0	0	3	3	0	3	0
circRNA_0630|Chr1:198960616_198962261_+	0	2	0	0	0	0	0	0	0	0	0	0
circRNA_0631|Chr1:198965547_198968419_+	0	0	0	0	0	4	0	3	0	2	0	0
circRNA_0632|Chr1:198965547_198972343_+	3	0	0	0	0	0	0	4	0	3	0	3
circRNA_0633|Chr1:198967641_198972343_+	0	0	0	3	0	5	0	0	3	5	4	4
circRNA_0634|Chr1:198986964_198987146_-	0	0	0	0	0	0	0	0	0	0	0	2
circRNA_0635|Chr1:198994747_198995342_+	9	17	9	18	8	11	18	18	16	16	17	21
circRNA_0636|Chr1:199701022_199706556_-	0	0	0	0	0	0	0	0	0	2	0	0
circRNA_0637|Chr1:199846437_199847539_-	0	0	0	0	0	0	0	0	0	0	0	2
circRNA_0638|Chr1:199846437_199851902_-	2	0	0	0	0	0	0	0	0	0	0	0
circRNA_0639|Chr1:199960558_199960760_-	0	0	0	6	0	0	0	0	0	0	0	0
circRNA_0640|Chr1:200095778_200105174_+	0	0	0	0	0	0	0	0	0	0	0	3
circRNA_0641|Chr1:200102205_200105174_+	0	0	0	0	0	0	0	2	0	2	0	0
circRNA_0642|Chr1:200144691_200149111_-	0	0	0	0	0	0	0	0	0	0	0	2
circRNA_0643|Chr1:200147834_200149111_-	0	0	0	0	0	0	2	0	0	0	3	0
circRNA_0644|Chr1:200175908_200177487_+	0	0	0	3	0	0	0	0	0	0	0	0
circRNA_0645|Chr1:200606971_200611455_-	0	0	2	0	0	0	0	0	0	0	0	0
circRNA_0646|Chr1:200606971_200615170_-	0	0	0	0	0	0	0	0	0	2	0	0
circRNA_0647|Chr1:200606971_200658087_-	0	0	0	0	0	2	0	0	0	0	0	0
circRNA_0648|Chr1:200625594_200658087_-	0	0	0	0	0	0	2	0	0	0	0	0
circRNA_0649|Chr1:200648164_200658087_-	3	0	0	0	0	0	0	2	2	4	3	0
circRNA_0650|Chr1:200648164_200671090_-	0	0	0	0	0	3	0	0	0	3	0	0
circRNA_0651|Chr1:200648164_200672411_-	0	0	0	0	0	0	5	3	2	4	2	5
circRNA_0652|Chr1:200671013_200672411_-	0	0	0	0	2	0	2	3	0	0	2	0
circRNA_0653|Chr1:201097034_201101897_-	0	0	3	2	3	2	3	3	0	0	0	0
circRNA_0654|Chr1:201098591_201101897_-	0	0	0	0	0	0	0	0	0	2	0	0
circRNA_0655|Chr1:201183051_201188802_+	5	3	0	4	0	0	5	0	2	2	0	5
circRNA_0656|Chr1:201304457_201317622_+	0	0	0	0	0	0	2	0	0	0	0	0
circRNA_0657|Chr1:201438446_201451005_+	0	0	0	0	0	0	0	0	0	0	2	0
circRNA_0658|Chr1:201442093_201447986_+	0	0	0	0	0	0	0	2	0	0	5	0
circRNA_0659|Chr1:201442093_201451005_+	3	8	14	9	12	5	12	10	17	7	9	20
circRNA_0660|Chr1:201442093_201462814_+	0	0	0	0	2	0	0	0	0	0	0	0
circRNA_0661|Chr1:201523375_201524041_+	4	0	2	6	2	10	3	5	2	6	5	4
circRNA_0662|Chr1:202000512_202004497_+	0	0	0	0	0	0	0	0	0	0	2	2
circRNA_0663|Chr1:202490754_202497913_+	0	0	0	0	3	0	0	0	3	0	0	0
circRNA_0664|Chr1:203272587_203275516_+	0	2	0	0	0	2	0	0	0	0	0	0
circRNA_0665|Chr1:203272587_203279921_+	0	0	0	0	0	2	0	0	0	0	0	0
circRNA_0666|Chr1:203272587_203286711_+	0	0	3	0	0	6	4	7	2	2	5	2
circRNA_0667|Chr1:203282869_203286711_+	0	0	0	0	0	2	0	0	0	0	0	0
circRNA_0668|Chr1:203286194_203299256_+	0	0	0	0	0	3	0	0	0	0	0	3
circRNA_0669|Chr1:203286679_203317455_+	14	0	0	0	13	90	0	0	0	0	58	37
circRNA_0670|Chr1:203294332_203299256_+	0	0	0	0	0	0	0	0	0	3	3	0
circRNA_0671|Chr1:204114121_204133862_-	0	0	0	0	0	0	0	0	0	0	0	2
circRNA_0672|Chr1:204267319_204275972_-	0	3	0	0	0	0	0	0	0	0	4	0
circRNA_0673|Chr1:204761727_204762505_-	0	0	0	0	0	0	0	0	0	0	2	0
circRNA_0674|Chr1:204761727_204773141_-	0	0	0	0	0	0	0	0	0	0	2	0
circRNA_0675|Chr1:204761727_204780713_-	4	0	0	0	0	0	2	5	0	2	0	4
circRNA_0676|Chr1:204773090_204780713_-	4	0	0	2	2	0	4	3	3	3	6	2
circRNA_0677|Chr1:204773090_204794512_-	0	0	0	0	0	0	0	2	0	0	0	0
circRNA_0678|Chr1:204830814_204842017_-	2	2	0	0	0	0	0	0	0	2	2	0
circRNA_0679|Chr1:204831740_204842017_-	0	0	2	0	0	0	2	0	0	0	0	0
circRNA_0680|Chr1:204836742_204842017_-	0	0	3	0	0	0	0	2	0	2	0	0
circRNA_0681|Chr1:204958606_204961691_+	3	0	0	0	2	4	4	0	0	2	0	2
circRNA_0682|Chr1:204959155_204961691_+	10	0	0	5	9	9	4	4	5	11	3	9
circRNA_0683|Chr1:204959173_204961691_+	112	31	56	66	61	66	80	105	75	99	85	80
circRNA_0684|Chr1:204959173_204975227_+	0	0	0	0	0	0	0	0	2	0	0	0
circRNA_0685|Chr1:204959173_204980121_+	0	0	6	5	2	9	7	3	0	3	2	0
circRNA_0686|Chr1:204959173_204988430_+	7	0	2	0	4	9	2	3	0	6	5	5
circRNA_0687|Chr1:204960841_204961691_+	2	0	5	2	0	0	4	0	0	0	3	2
circRNA_0688|Chr1:204960841_204975227_+	0	0	0	0	0	2	0	0	0	0	0	3
circRNA_0689|Chr1:204960841_204980121_+	6	0	4	4	2	4	3	5	2	6	6	8
circRNA_0690|Chr1:204960841_204988430_+	0	0	0	0	0	0	0	4	8	5	3	5
circRNA_0691|Chr1:204975105_204980121_+	0	2	0	0	0	0	0	0	2	0	0	0
circRNA_0692|Chr1:204979934_204988430_+	0	2	3	4	4	0	0	6	0	2	0	7
circRNA_0693|Chr1:205803204_205816538_-	0	0	0	0	0	0	0	0	0	0	3	0
circRNA_0694|Chr1:206022002_206028748_-	0	0	0	0	0	0	0	0	2	0	0	0
circRNA_0695|Chr1:206956299_206969242_+	2	2	0	3	3	0	4	2	0	2	3	2
circRNA_0696|Chr1:206956299_206978733_+	0	0	2	0	0	0	0	0	0	0	3	0
circRNA_0697|Chr1:206962632_206978733_+	0	0	0	0	0	0	0	0	0	0	0	2
circRNA_0698|Chr1:206989832_207016489_+	0	0	0	0	0	0	2	0	0	0	0	0
circRNA_0699|Chr1:207005330_207016489_+	3	2	0	7	2	0	9	3	0	8	0	7
circRNA_0700|Chr1:207005330_207023431_+	2	0	0	0	0	0	0	0	0	0	0	0
circRNA_0701|Chr1:207085491_207111018_+	0	0	0	2	0	0	0	0	2	0	0	0
circRNA_0702|Chr1:207221461_207228383_+	0	0	0	0	0	0	0	0	0	0	0	2
circRNA_0703|Chr1:207977579_207986972_+	0	0	0	0	0	0	0	2	0	0	0	0
circRNA_0704|Chr1:207981622_207986972_+	0	0	0	0	0	0	2	0	0	0	2	0
circRNA_0705|Chr1:208015320_208018340_-	0	0	0	0	0	0	0	0	0	0	2	0
circRNA_0706|Chr1:209710668_209711353_-	0	0	0	0	0	0	2	2	2	0	0	0
circRNA_0707|Chr1:209778386_209786671_+	0	0	2	0	0	0	0	0	0	0	0	0
circRNA_0708|Chr1:209792071_209795897_+	2	0	0	0	0	3	0	3	2	0	0	0
circRNA_0709|Chr1:212607452_212614056_+	0	0	0	0	3	0	0	0	0	0	0	0
circRNA_0710|Chr1:214153502_214155705_-	0	0	0	0	0	0	0	0	3	0	0	2
circRNA_0711|Chr1:214562895_214581660_+	0	0	4	7	4	4	3	0	7	0	2	0
circRNA_0712|Chr1:214562895_214605872_+	0	0	0	0	0	0	0	2	0	2	0	0
circRNA_0713|Chr1:214574407_214581660_+	0	0	0	0	0	2	2	0	0	0	0	2
circRNA_0714|Chr1:214595008_214605872_+	2	0	0	0	0	0	0	0	0	0	0	0
circRNA_0715|Chr1:214933395_214938246_+	0	0	0	0	0	0	0	0	0	0	0	2
circRNA_0716|Chr1:215905137_215907047_-	2	0	2	0	0	9	0	0	4	2	0	7
circRNA_0717|Chr1:215905137_215910920_-	0	2	4	0	0	0	3	0	0	3	0	0
circRNA_0718|Chr1:215905137_215914784_-	3	0	0	0	0	0	3	5	0	0	0	0
circRNA_0719|Chr1:215905137_215918638_-	0	0	2	0	0	0	3	0	3	0	3	2
circRNA_0720|Chr1:215905137_215934080_-	0	0	4	0	2	0	0	0	2	4	0	2
circRNA_0721|Chr1:215905137_215969554_-	0	0	2	0	3	0	2	2	0	0	0	0
circRNA_0722|Chr1:215926361_215928223_-	0	0	2	0	0	0	0	0	0	0	0	0
circRNA_0723|Chr1:215937919_215939788_-	0	0	0	0	0	0	0	0	0	2	0	0
circRNA_0724|Chr1:215937919_215944869_-	0	0	0	0	0	0	0	0	0	3	0	0
circRNA_0725|Chr1:215939908_215941816_-	0	0	0	0	2	0	0	0	0	0	0	0
circRNA_0726|Chr1:216370170_216382773_+	4	0	3	4	0	2	8	3	0	0	7	7
circRNA_0727|Chr1:216560642_216566201_+	4	3	6	4	8	5	5	4	2	6	8	5
circRNA_0728|Chr1:216737401_216742438_-	0	0	0	0	0	0	0	2	0	0	0	0
circRNA_0729|Chr1:216815830_216819412_-	0	0	0	0	0	0	0	2	0	0	0	0
circRNA_0730|Chr1:217663801_217664930_+	0	0	0	0	0	0	0	2	0	0	0	0
circRNA_0731|Chr1:217779008_217782988_-	9	2	2	0	3	5	0	3	0	2	0	3
circRNA_0732|Chr1:218195598_218197067_+	0	0	2	4	0	0	0	0	0	0	5	0
circRNA_0733|Chr1:218535200_218537527_+	0	0	0	0	0	0	0	0	2	0	0	0
circRNA_0734|Chr1:218535200_218538525_+	0	0	0	0	0	0	0	0	0	0	2	0
circRNA_0735|Chr1:218569450_218595470_-	0	0	0	2	0	0	0	0	0	0	0	0
circRNA_0736|Chr1:218725545_218748117_-	0	2	0	0	0	0	0	0	0	0	0	0
circRNA_0737|Chr1:218727735_218755192_-	0	0	0	3	0	0	0	0	0	0	0	0
circRNA_0738|Chr1:218752420_218778447_-	0	0	0	0	0	0	0	0	2	0	0	0
circRNA_0739|Chr1:218755127_218758344_-	0	0	0	2	0	0	0	0	0	0	0	0
circRNA_0740|Chr1:218758207_218762503_-	0	0	0	0	0	0	2	3	2	0	0	0
circRNA_0741|Chr1:218776098_218778447_-	0	2	0	2	2	3	3	0	4	0	0	2
circRNA_0742|Chr1:218776104_218778447_-	0	0	0	0	0	0	0	0	0	2	0	0
circRNA_0743|Chr1:218777037_218778447_-	2	0	0	0	3	0	0	0	0	0	0	0
circRNA_0744|Chr1:218777059_218778447_-	0	0	0	0	0	0	0	0	0	0	2	0
circRNA_0745|Chr1:218832599_218844420_-	0	0	0	4	0	2	0	3	4	0	4	2
circRNA_0746|Chr1:218836671_218844420_-	0	0	2	0	0	0	2	2	0	4	0	0
circRNA_0747|Chr1:218838080_218844420_-	0	0	2	3	0	0	0	3	2	2	7	4
circRNA_0748|Chr1:218878878_218892208_-	0	0	0	0	0	0	0	2	0	0	0	0
circRNA_0749|Chr1:218880619_218883236_-	6	6	7	11	9	8	17	8	5	15	5	11
circRNA_0750|Chr1:219018599_219028923_+	4	4	4	3	0	2	6	4	0	7	6	4
circRNA_0751|Chr1:219353460_219354165_+	0	0	3	0	0	2	2	2	2	3	0	4
circRNA_0752|Chr1:219356188_219357260_+	0	0	0	0	0	0	3	0	2	0	4	0
circRNA_0753|Chr1:219413942_219414122_+	0	0	0	0	0	3	0	0	0	0	0	0
circRNA_0754|Chr1:219570015_219571238_-	0	3	2	2	3	3	3	0	6	5	2	4
circRNA_0755|Chr1:219592036_219638528_-	0	0	0	0	0	4	0	0	0	0	0	0
circRNA_0756|Chr1:220015523_220016193_+	4	4	2	2	5	2	4	0	5	3	4	2
circRNA_0757|Chr1:220032746_220034697_-	2	0	4	0	0	0	2	2	3	3	3	4
circRNA_0758|Chr1:220032746_220042767_-	0	0	0	0	0	0	0	2	0	0	0	0
circRNA_0759|Chr1:220039308_220040146_-	0	4	6	4	3	3	8	4	5	0	2	7
circRNA_0760|Chr1:220039308_220042767_-	4	0	4	0	6	0	2	4	0	6	5	10
circRNA_0761|Chr1:220039308_220049075_-	3	2	7	4	8	6	2	7	4	6	6	5
circRNA_0762|Chr1:220042074_220049075_-	0	0	0	0	3	0	0	0	0	0	3	0
circRNA_0763|Chr1:220047471_220049075_-	92	73	109	92	106	112	117	110	80	132	91	84
circRNA_0764|Chr1:220520112_220524962_-	0	2	0	0	2	0	0	5	0	0	0	2
circRNA_0765|Chr1:220524417_220524962_-	0	0	0	0	0	0	0	0	0	3	0	3
circRNA_0766|Chr1:221029040_221029681_-	0	0	0	0	0	0	4	0	0	0	0	0
circRNA_0767|Chr1:221065774_221067559_-	2	2	0	0	3	4	5	5	0	3	3	0
circRNA_0768|Chr1:221152314_221153076_-	0	0	0	0	0	0	0	0	0	0	0	2
circRNA_0769|Chr1:221152381_221152630_-	0	0	2	0	0	0	0	0	0	0	0	0
circRNA_0770|Chr1:221152501_221152672_-	0	0	0	0	0	2	0	0	0	0	0	0
circRNA_0771|Chr1:221152501_221152827_-	0	0	0	7	0	0	0	0	0	0	4	0
circRNA_0772|Chr1:221152508_221152672_-	0	0	0	0	0	0	0	2	0	0	0	0
circRNA_0773|Chr1:221153678_221154122_-	0	0	0	0	0	0	0	0	0	0	0	2
circRNA_0774|Chr1:221154984_221155160_-	0	0	0	0	0	0	0	0	0	0	2	0
circRNA_0775|Chr1:221155646_221155813_-	0	2	0	0	0	0	0	0	0	0	0	0
circRNA_0776|Chr1:221155755_221155925_-	0	2	0	0	0	0	0	0	0	0	0	0
circRNA_0777|Chr1:221156954_221157236_-	0	0	0	0	0	0	0	0	0	0	2	3
circRNA_0778|Chr1:221158617_221158790_-	35	121	57	56	78	65	62	63	61	69	64	94
circRNA_0779|Chr1:221185801_221186464_-	0	2	0	0	0	0	3	0	0	0	0	0
circRNA_0780|Chr1:221347566_221349792_-	0	0	0	0	4	0	2	0	2	0	4	3
circRNA_0781|Chr1:221411126_221411944_+	0	0	0	0	0	0	0	0	0	3	0	0
circRNA_0782|Chr1:221666526_221666790_-	0	0	0	0	0	0	0	0	0	0	0	2
circRNA_0783|Chr1:222194981_222196656_-	0	0	0	0	0	0	2	0	0	0	0	0
circRNA_0784|Chr1:222281015_222281287_-	0	0	0	0	0	0	0	2	0	0	0	0
circRNA_0785|Chr1:222287251_222288802_-	0	0	0	0	0	0	0	0	0	0	0	2
circRNA_0786|Chr1:222318743_222319656_+	0	0	2	0	2	0	0	0	0	4	0	0
circRNA_0787|Chr1:222619896_222621077_-	0	0	0	2	5	0	2	3	0	2	0	3
circRNA_0788|Chr1:222763689_222775140_+	3	0	5	9	6	9	3	6	8	3	9	3
circRNA_0789|Chr1:222770362_222775140_+	3	0	0	0	0	0	0	0	0	0	0	0
circRNA_0790|Chr1:222773286_222775140_+	0	0	0	0	0	2	0	0	0	0	2	0
circRNA_0791|Chr1:222775002_222784238_+	0	0	0	3	0	0	0	0	2	0	0	0
circRNA_0792|Chr1:222862225_222869690_+	0	0	0	0	3	0	0	2	0	0	0	0
circRNA_0793|Chr1:224921801_224923266_+	0	0	0	0	0	0	2	0	0	0	0	0
circRNA_0794|Chr1:225019523_225021984_+	3	2	0	2	0	5	2	0	3	3	0	6
circRNA_0795|Chr1:225086648_225087197_+	3	0	4	3	3	0	2	0	0	5	2	0
circRNA_0796|Chr1:225100588_225100951_+	0	0	0	0	0	0	0	0	0	0	2	0
circRNA_0797|Chr1:225195375_225232326_+	0	0	0	0	0	0	0	0	0	0	0	2
circRNA_0798|Chr1:225199317_225201293_+	2	0	0	0	0	0	0	0	0	0	0	0
circRNA_0799|Chr1:225199597_225199799_+	0	0	0	0	0	0	0	0	0	0	0	2
circRNA_0800|Chr1:225200427_225201293_+	0	0	0	0	0	0	0	0	0	3	0	5
circRNA_0801|Chr1:225200796_225200957_-	0	0	0	0	0	4	0	0	0	0	2	0
circRNA_0802|Chr1:225202236_225202437_+	0	0	0	0	2	0	0	0	0	0	0	0
circRNA_0803|Chr1:225204162_225210567_+	0	0	0	0	0	0	0	0	0	3	0	0
circRNA_0804|Chr1:225209298_225209466_+	0	0	0	0	0	0	0	0	0	0	0	2
circRNA_0805|Chr1:225210309_225210567_+	0	0	0	0	0	0	0	0	0	0	3	0
circRNA_0806|Chr1:225211909_225212055_+	0	0	0	0	0	0	0	0	2	0	0	0
circRNA_0807|Chr1:226119298_226139368_-	0	0	0	0	0	0	0	0	0	0	3	0
circRNA_0808|Chr1:226666019_226667550_+	0	2	0	3	5	0	0	2	0	0	0	0
circRNA_0809|Chr1:228400357_228403581_+	0	0	0	0	0	0	2	0	0	0	0	0
circRNA_0810|Chr1:228412855_228413464_+	0	0	0	4	0	0	0	0	2	0	0	0
circRNA_0811|Chr1:231411886_231415776_-	0	0	0	0	0	0	2	0	0	0	3	0
circRNA_0812|Chr1:231457046_231498197_-	0	0	0	0	0	0	0	0	0	0	2	0
circRNA_0813|Chr1:233203859_233208380_-	0	0	0	0	0	2	0	0	0	0	0	0
circRNA_0814|Chr1:233464787_233469856_+	2	0	3	2	0	0	0	2	2	2	0	3
circRNA_0815|Chr1:233561451_233581182_+	0	0	0	2	0	0	0	0	0	0	0	0
circRNA_0816|Chr1:233570084_233581182_+	3	0	2	0	2	0	0	0	0	0	0	2
circRNA_0817|Chr1:233578229_233581182_+	4	4	2	2	4	3	7	4	2	5	3	0
circRNA_0818|Chr1:235393349_235395737_-	0	0	0	0	3	0	0	0	0	0	0	0
circRNA_0819|Chr1:235703054_235713613_-	0	0	0	0	0	2	0	0	0	0	0	0
circRNA_0820|Chr1:235720725_235737635_-	8	2	0	0	2	2	0	0	2	0	2	0
circRNA_0821|Chr1:235750193_235761819_-	5	0	2	0	2	3	4	4	2	4	0	4
circRNA_0822|Chr1:235750193_235780409_-	4	0	0	0	0	0	0	0	0	0	0	0
circRNA_0823|Chr1:235750193_235789332_-	0	0	3	0	0	0	0	0	3	0	0	0
circRNA_0824|Chr1:235757649_235761819_-	0	0	3	0	2	0	0	0	0	0	0	0
circRNA_0825|Chr1:235777942_235780409_-	2	3	2	0	8	3	0	7	2	4	0	0
circRNA_0826|Chr1:235777942_235789332_-	2	2	0	0	3	5	4	3	0	2	3	0
circRNA_0827|Chr1:235789223_235800597_-	6	0	0	2	3	0	3	6	4	3	4	0
circRNA_0828|Chr1:235793877_235800597_-	2	0	0	0	2	0	0	0	0	2	0	0
circRNA_0829|Chr1:236077711_236164009_+	0	3	2	0	0	0	0	0	0	0	0	0
circRNA_0830|Chr1:236147730_236229567_+	0	0	0	0	0	2	0	0	0	0	0	0
circRNA_0831|Chr1:236196243_236198026_+	8	2	9	13	9	7	11	9	6	3	6	5
circRNA_0832|Chr1:236196243_236229567_+	0	5	2	3	4	4	4	2	2	6	3	3
circRNA_0833|Chr1:236276393_236290633_+	0	0	0	0	0	0	0	0	2	0	0	0
circRNA_0834|Chr1:236276393_236298554_+	0	0	0	0	0	0	0	2	0	0	0	0
circRNA_0835|Chr1:236302275_236308188_+	0	0	0	0	0	0	0	0	3	0	0	0
circRNA_0836|Chr1:236692606_236703484_-	0	0	0	0	0	0	0	2	0	0	0	0
circRNA_0837|Chr1:236884540_236900904_-	0	0	0	0	0	0	0	0	4	0	2	0
circRNA_0838|Chr1:238998947_239014340_-	0	4	0	0	2	6	3	5	5	5	6	3
circRNA_0839|Chr1:239008546_239014340_-	0	0	0	2	0	0	0	0	0	0	0	0
circRNA_0840|Chr1:239008546_239020027_-	0	0	0	0	0	0	0	0	0	4	0	0
circRNA_0841|Chr1:239048190_239048402_-	0	0	0	2	0	0	0	0	0	0	0	0
circRNA_0842|Chr1:239293164_239299795_+	0	0	3	3	5	0	0	2	3	0	4	0
circRNA_0843|Chr1:239447977_239464823_+	0	0	0	0	0	0	0	0	0	0	0	3
circRNA_0844|Chr1:241002399_241007936_-	2	0	2	0	0	0	0	2	0	0	0	0
circRNA_0845|Chr1:241002399_241008652_-	0	0	0	0	2	3	2	0	0	0	0	0
circRNA_0846|Chr1:241002399_241041360_-	0	0	0	0	2	0	0	0	0	0	0	0
circRNA_0847|Chr1:241098965_241139602_-	0	0	0	0	0	0	0	0	0	0	0	3
circRNA_0848|Chr1:241126635_241139602_-	0	3	0	0	0	0	0	0	3	2	2	2
circRNA_0849|Chr1:241799271_241799452_-	0	0	0	2	0	0	0	0	0	0	0	0
circRNA_0850|Chr1:241963278_241964424_-	0	0	4	0	0	0	2	0	0	0	2	3
circRNA_0851|Chr1:242229811_242233797_-	0	0	0	0	0	0	0	2	0	0	0	0
circRNA_0852|Chr1:242229811_242250100_-	0	2	3	0	0	0	0	0	0	2	0	0
circRNA_0853|Chr1:242239657_242248135_-	0	0	2	0	0	0	0	0	0	0	0	0
circRNA_0854|Chr1:242244899_242248135_-	0	0	2	0	0	2	0	0	0	0	0	0
circRNA_0855|Chr1:242244899_242250100_-	0	0	2	0	0	0	3	0	0	0	4	0
circRNA_0856|Chr1:242327790_242361812_-	0	0	0	0	0	0	0	0	0	2	0	0
circRNA_0857|Chr1:242607845_242631822_-	2	0	3	0	6	0	0	4	2	3	4	0
circRNA_0858|Chr1:242607845_242648705_-	0	0	0	0	0	0	3	0	0	0	0	0
circRNA_0859|Chr1:242607845_242661567_-	0	0	0	0	0	2	0	0	0	0	0	0
circRNA_0860|Chr1:242627495_242648705_-	0	0	0	2	0	0	0	0	0	0	0	0
circRNA_0861|Chr1:242716557_242737019_-	0	3	2	6	4	4	0	2	3	3	2	2
circRNA_0862|Chr1:242716637_242717508_+	0	0	0	0	0	0	0	0	0	2	0	0
circRNA_0863|Chr1:242720177_242725160_-	0	0	0	0	0	0	0	0	0	4	0	0
circRNA_0864|Chr1:242761821_242762094_+	0	0	0	0	0	2	0	0	0	0	0	0
circRNA_0865|Chr1:243014234_243018525_+	3	4	4	0	6	7	5	7	3	2	0	5
circRNA_0866|Chr1:243014234_243038785_+	0	0	0	0	0	0	0	0	0	2	0	0
circRNA_0867|Chr1:243014234_243047294_+	0	2	0	0	3	3	3	0	0	3	0	4
circRNA_0868|Chr1:243014234_243058963_+	0	0	0	0	0	0	0	0	0	0	0	2
circRNA_0869|Chr1:243052191_243058963_+	2	0	0	0	3	0	2	0	0	0	0	2
circRNA_0870|Chr1:243079518_243080161_+	0	2	0	0	0	0	0	0	0	0	0	0
circRNA_0871|Chr1:243233767_243276527_+	0	0	0	0	0	0	0	0	0	0	0	2
circRNA_0872|Chr1:243373401_243376079_+	4	0	0	3	4	3	0	0	2	0	0	0
circRNA_0873|Chr1:244629853_244728217_+	0	0	0	0	0	0	0	2	0	0	0	0
circRNA_0874|Chr1:244630341_244641499_+	0	0	0	0	0	0	0	0	0	0	0	3
circRNA_0875|Chr1:244630341_244728217_+	0	0	3	6	0	3	0	3	0	0	7	0
circRNA_0876|Chr1:244650351_244664389_+	0	0	0	0	2	0	0	0	2	0	0	0
circRNA_0877|Chr1:244657648_244664389_+	0	0	0	0	0	2	2	0	0	0	0	4
circRNA_0878|Chr1:244657648_244681629_+	0	0	0	0	0	3	2	0	0	0	0	0
circRNA_0879|Chr1:244688940_244706154_+	0	0	0	0	0	0	0	0	0	0	0	2
circRNA_0880|Chr1:244706108_244728217_+	0	0	0	0	0	3	0	0	0	4	0	0
circRNA_0881|Chr1:244714474_244728217_+	0	0	0	0	0	0	0	0	0	0	2	0
circRNA_0882|Chr1:244714474_244757847_+	0	0	0	0	3	0	0	0	0	0	0	0
circRNA_0883|Chr1:245898739_245926452_-	2	0	0	0	0	0	0	0	0	0	0	0
circRNA_0884|Chr1:245926333_245937626_-	0	0	0	0	3	2	3	2	0	0	4	3
circRNA_0885|Chr1:245955041_246031901_-	0	0	0	2	0	0	0	0	0	0	0	0
circRNA_0886|Chr1:245980510_246010590_-	0	2	0	0	0	0	0	0	0	0	0	0
circRNA_0887|Chr1:246437856_246476440_-	0	0	0	0	0	0	0	3	0	0	0	0
circRNA_0888|Chr1:246472167_246476440_-	0	3	2	0	3	3	0	0	0	3	3	3
circRNA_0889|Chr1:246648294_246649407_-	7	2	3	0	4	5	5	5	2	7	0	3
circRNA_0890|Chr1:246648294_246657760_-	8	3	4	5	6	4	6	4	0	7	5	5
circRNA_0891|Chr1:246784973_246785456_-	0	0	0	0	0	2	0	0	0	0	0	0
circRNA_0892|Chr1:247423971_247428484_+	0	0	0	2	0	3	0	0	0	0	0	0
circRNA_0893|Chr1:247693092_247719565_+	0	3	0	0	0	0	0	0	0	0	0	0
circRNA_0894|Chr1:247711959_247736943_+	0	0	0	0	0	0	0	0	0	0	0	2
circRNA_0895|Chr1:247711959_247745292_+	2	0	3	0	0	5	0	2	0	2	0	3
circRNA_0896|Chr1:247743814_247766953_+	9	0	0	0	0	0	4	3	2	5	4	9
circRNA_0897|Chr1:247753356_247766953_+	0	0	0	0	3	0	0	0	0	0	0	0
circRNA_0898|Chr1:247922780_247945662_-	0	0	0	0	0	2	0	3	2	0	0	0
circRNA_0899|Chr1:247922780_247960553_-	3	0	9	3	7	5	4	3	4	6	3	0
circRNA_0900|Chr1:247931326_247960553_-	2	0	2	2	0	2	3	0	5	0	3	0
circRNA_0901|Chr1:247944245_247945662_-	9	5	7	7	11	14	7	4	5	16	15	5
circRNA_0902|Chr1:247944245_247960553_-	10	3	6	13	7	10	11	9	6	7	10	12
circRNA_0903|Chr1:248269813_248277067_+	3	0	0	0	0	0	0	0	0	0	0	0
circRNA_0904|Chr1:249367009_249463431_-	0	0	0	0	0	0	0	2	0	0	0	0
circRNA_0905|Chr1:249456244_249463431_-	0	0	0	0	0	0	0	0	2	0	0	0
circRNA_0906|Chr1:249461093_249463431_-	2	0	4	3	5	4	6	0	0	0	5	2
circRNA_0907|Chr1:249699317_249703470_-	0	3	0	0	0	4	0	0	0	0	0	0
circRNA_0908|Chr1:249699322_249703470_-	0	0	2	2	3	9	4	0	2	3	5	6
circRNA_0909|Chr1:249700444_249700605_-	0	0	0	0	0	2	0	0	0	0	0	0
circRNA_0910|Chr1:249802028_249813067_-	0	0	0	0	0	0	0	0	0	4	0	0
circRNA_0911|Chr1:250105797_250105963_-	0	3	0	0	0	0	0	0	3	0	0	0
circRNA_0912|Chr1:250300687_250367970_-	0	0	0	0	0	0	0	0	2	0	0	0
circRNA_0913|Chr1:250612597_250630729_-	0	0	3	2	0	0	0	0	0	0	0	0
circRNA_0914|Chr1:251246098_251253724_-	0	2	5	3	0	5	5	3	3	3	3	5
circRNA_0915|Chr1:251246098_251266175_-	2	0	0	0	0	0	0	0	0	0	0	0
circRNA_0916|Chr1:251262192_251269854_-	10	3	7	2	11	2	6	2	4	6	6	0
circRNA_0917|Chr1:251455609_251463748_+	6	3	12	8	10	12	9	13	10	6	8	5
circRNA_0918|Chr1:251455609_251477248_+	2	0	2	0	0	0	2	0	0	0	0	0
circRNA_0919|Chr1:251455609_251485480_+	7	0	3	0	3	5	0	7	5	3	3	0
circRNA_0920|Chr1:251461620_251482822_+	0	0	2	0	0	0	0	0	0	0	0	0
circRNA_0921|Chr1:251461620_251485480_+	0	3	0	0	0	0	2	0	0	2	5	0
circRNA_0922|Chr1:252537818_252539458_-	0	0	0	6	10	12	13	6	0	6	0	12
circRNA_0923|Chr1:252537846_252539530_+	0	0	0	2	0	0	0	0	0	0	0	0
circRNA_0924|Chr1:252537894_252539495_+	0	0	0	3	0	4	0	0	0	0	2	6
circRNA_0925|Chr1:252537894_252539573_+	0	0	0	0	0	0	0	3	0	0	0	0
circRNA_0926|Chr1:252537894_252541025_+	0	3	0	0	0	0	0	0	0	0	0	0
circRNA_0927|Chr1:252537904_252539530_+	0	0	0	0	0	0	3	0	0	0	0	0
circRNA_0928|Chr1:252539423_252547611_-	6	2	4	5	5	8	10	11	0	4	7	10
circRNA_0929|Chr1:252627911_252632249_+	4	4	0	2	9	10	13	8	2	7	19	17
circRNA_0930|Chr1:253120469_253134791_-	23	3	10	8	11	15	13	12	6	12	4	5
circRNA_0931|Chr1:253120469_253148277_-	18	2	4	6	9	12	10	4	2	3	7	13
circRNA_0932|Chr1:253120469_253180831_-	3	0	2	0	0	0	0	0	0	0	0	0
circRNA_0933|Chr1:253134538_253148277_-	4	0	3	2	0	0	0	0	0	2	0	0
circRNA_0934|Chr1:253142534_253148277_-	3	0	0	0	0	0	0	0	0	0	0	0
circRNA_0935|Chr1:253147921_253180827_-	6	0	0	0	0	0	0	0	0	0	0	0
circRNA_0936|Chr1:253147925_253148277_-	74	14	25	14	39	21	27	20	21	29	20	19
circRNA_0937|Chr1:254700270_254708288_+	0	0	0	3	2	0	0	3	0	0	0	0
circRNA_0938|Chr1:255200465_255217403_+	0	0	0	0	0	0	2	0	0	0	0	0
circRNA_0939|Chr1:255200465_255220207_+	0	0	0	0	0	3	0	0	0	0	0	0
circRNA_0940|Chr1:255215916_255217403_+	0	0	0	0	0	2	0	0	0	2	0	0
circRNA_0941|Chr1:255215916_255220207_+	4	0	0	0	3	0	0	0	0	0	0	0
circRNA_0942|Chr1:255486770_255494807_+	2	0	0	4	0	0	0	0	0	0	0	3
circRNA_0943|Chr1:255489125_255494807_+	0	0	0	0	2	0	0	0	0	0	2	0
circRNA_0944|Chr1:255586172_255609010_+	0	0	2	0	0	0	0	0	0	0	0	0
circRNA_0945|Chr1:255636891_255637533_+	2	3	0	4	0	2	4	0	2	5	0	0
circRNA_0946|Chr1:255642574_255650639_+	0	0	0	0	0	0	0	2	0	0	0	0
circRNA_0947|Chr1:255685048_255694514_-	4	5	0	3	5	5	3	3	6	8	9	0
circRNA_0948|Chr1:255727112_255764689_-	2	0	0	0	0	0	0	0	0	0	2	0
circRNA_0949|Chr1:255727112_255774681_-	2	0	2	0	0	0	2	4	0	0	0	0
circRNA_0950|Chr1:255764633_255774681_-	0	0	0	0	0	0	0	0	0	0	3	0
circRNA_0951|Chr1:255942367_255958835_-	3	0	0	3	0	0	5	0	3	0	0	0
circRNA_0952|Chr1:255956584_255976428_-	0	0	0	0	0	0	0	0	0	2	0	0
circRNA_0953|Chr1:255970949_255976428_-	2	0	0	0	0	0	0	0	0	0	0	0
circRNA_0954|Chr1:256263404_256274818_+	0	0	0	0	0	0	0	0	0	2	0	0
circRNA_0955|Chr1:256263404_256299276_+	0	0	0	0	0	0	2	2	0	0	0	0
circRNA_0956|Chr1:256590672_256594842_-	0	0	0	0	2	0	0	0	0	0	0	0
circRNA_0957|Chr1:256626805_256629258_-	0	0	0	0	0	3	0	0	0	0	2	0
circRNA_0958|Chr1:256626805_256646244_-	0	0	0	0	3	0	0	0	0	0	4	2
circRNA_0959|Chr1:256631413_256646244_-	0	0	0	0	0	2	0	0	0	0	0	0
circRNA_0960|Chr1:256710536_256712176_-	5	0	0	4	6	0	0	9	4	12	0	10
circRNA_0961|Chr1:256710536_256728201_-	0	0	0	0	4	7	5	0	4	4	2	2
circRNA_0962|Chr1:256710536_256734892_-	0	0	0	2	0	0	3	2	0	5	0	0
circRNA_0963|Chr1:256710536_256737174_-	19	33	7	10	12	38	24	5	9	32	27	32
circRNA_0964|Chr1:256883032_256904805_-	0	0	0	0	0	3	0	0	0	0	0	0
circRNA_0965|Chr1:256888518_256904805_-	0	0	0	0	0	0	2	0	0	0	0	0
circRNA_0966|Chr1:257191149_257192683_+	0	0	0	2	0	0	0	0	3	0	0	0
circRNA_0967|Chr1:257412719_257415647_+	0	0	0	0	0	0	0	0	0	2	0	0
circRNA_0968|Chr1:257488392_257491755_-	0	0	0	2	0	0	0	0	0	0	0	0
circRNA_0969|Chr1:259309129_259335798_-	0	0	0	0	0	0	3	0	0	0	0	0
circRNA_0970|Chr1:259328625_259335798_-	0	0	0	0	0	0	0	0	0	0	0	2
circRNA_0971|Chr1:259382989_259409897_-	2	0	0	0	0	0	0	0	0	0	0	0
circRNA_0972|Chr1:259396273_259402838_-	3	3	5	0	5	2	2	7	6	6	7	9
circRNA_0973|Chr1:259396273_259409897_-	0	0	2	5	2	0	4	4	2	0	2	3
circRNA_0974|Chr1:259396273_259421082_-	0	0	0	0	0	0	2	3	0	3	0	0
circRNA_0975|Chr1:259396273_259429446_-	0	0	7	0	0	0	0	0	3	0	0	0
circRNA_0976|Chr1:259396273_259437470_-	2	0	2	4	2	2	4	4	3	5	6	3
circRNA_0977|Chr1:259406578_259429446_-	0	0	0	0	2	0	0	0	3	0	0	0
circRNA_0978|Chr1:259409812_259437470_-	0	0	2	0	0	0	0	0	0	0	0	0
circRNA_0979|Chr1:259409812_259448512_-	0	0	0	0	0	0	0	0	0	0	0	3
circRNA_0980|Chr1:259421033_259437470_-	0	3	0	0	0	0	2	0	0	0	0	0
circRNA_0981|Chr1:259421033_259459540_-	0	0	0	0	0	0	0	3	0	0	0	0
circRNA_0982|Chr1:259448449_259459540_-	3	0	3	2	0	2	2	10	5	4	5	7
circRNA_0983|Chr1:259448449_259479455_-	0	0	0	0	0	0	0	0	0	0	3	0
circRNA_0984|Chr1:259450673_259488326_-	0	0	0	0	2	0	0	0	0	0	0	0
circRNA_0985|Chr1:259469136_259488326_-	0	0	0	0	2	0	0	0	0	2	0	0
circRNA_0986|Chr1:259479327_259488326_-	0	0	2	4	4	0	4	2	0	0	0	0
circRNA_0987|Chr1:260484266_260507970_-	0	0	0	0	0	0	0	2	0	0	0	0
circRNA_0988|Chr1:260490864_260507970_-	3	0	0	0	0	3	0	2	0	5	3	0
circRNA_0989|Chr1:260498142_260507970_-	0	0	0	0	0	0	0	0	0	0	2	0
circRNA_0990|Chr1:260791756_260801171_+	7	6	4	5	3	9	3	4	5	5	7	9
circRNA_0991|Chr1:261033341_261035299_-	0	0	0	2	0	0	0	0	0	0	0	0
circRNA_0992|Chr1:261165387_261165588_-	0	0	4	0	0	0	0	0	3	0	0	0
circRNA_0993|Chr1:261198164_261200060_-	0	2	0	3	3	2	0	0	4	4	3	0
circRNA_0994|Chr1:261211388_261216967_-	0	2	0	0	0	0	0	0	0	0	0	0
circRNA_0995|Chr1:261347528_261350203_+	2	2	2	5	6	2	3	5	2	6	7	2
circRNA_0996|Chr1:261355523_261358856_+	0	0	0	0	2	0	0	0	0	0	0	0
circRNA_0997|Chr1:261426997_261430166_+	0	0	0	0	0	0	0	0	0	0	0	2
circRNA_0998|Chr1:262002934_262005090_-	0	0	0	0	0	3	0	0	0	0	0	2
circRNA_0999|Chr1:262786087_262811422_-	0	0	0	2	0	0	2	0	0	0	0	0
circRNA_1000|Chr1:263249208_263253633_-	6	0	0	0	4	0	0	0	2	0	0	0
circRNA_1001|Chr1:263422609_263422775_+	0	0	0	0	0	2	0	0	0	0	0	0
circRNA_1002|Chr1:263633065_263633397_-	4	2	2	4	3	0	8	4	2	5	2	2
circRNA_1003|Chr1:263677854_263687576_-	0	0	0	0	0	0	0	0	0	0	0	2
circRNA_1004|Chr1:263873195_263879968_-	0	0	0	0	0	2	0	0	0	0	0	0
circRNA_1005|Chr1:264001511_264066989_+	0	0	0	0	0	0	0	0	5	0	4	0
circRNA_1006|Chr1:264060261_264060509_-	0	2	0	2	0	0	0	0	0	2	0	0
circRNA_1007|Chr1:264161350_264163326_-	0	0	0	0	0	0	0	0	0	2	0	0
circRNA_1008|Chr1:264161904_264162106_+	0	0	0	0	2	0	0	0	0	0	0	0
circRNA_1009|Chr1:264161904_264162110_+	0	0	0	0	12	0	0	5	0	0	0	3
circRNA_1010|Chr1:264161904_264162139_+	5	0	0	0	4	0	0	4	0	0	0	3
circRNA_1011|Chr1:264162843_264163027_+	0	0	2	0	0	0	0	0	0	0	0	0
circRNA_1012|Chr1:264162843_264163046_+	0	0	0	0	0	0	0	2	0	0	0	0
circRNA_1013|Chr1:264162843_264163089_+	3	0	0	0	0	0	2	0	2	0	0	0
circRNA_1014|Chr1:264168808_264171849_-	4	0	0	0	0	0	0	2	2	3	0	0
circRNA_1015|Chr1:264674065_264689905_+	3	0	0	2	2	5	6	6	4	2	3	3
circRNA_1016|Chr1:264674065_264692492_+	0	0	0	2	0	3	0	0	0	0	0	0
circRNA_1017|Chr1:264674065_264702556_+	2	0	0	0	0	0	0	0	0	0	0	0
circRNA_1018|Chr1:264682394_264689905_+	0	0	0	0	0	0	0	0	0	3	0	0
circRNA_1019|Chr1:264708645_264717164_+	0	0	0	0	2	0	0	0	0	0	0	0
circRNA_1020|Chr1:264825383_264825866_+	0	0	0	0	0	0	0	0	2	0	0	0
circRNA_1021|Chr1:265237536_265242089_+	0	0	0	0	0	0	2	0	0	0	2	0
circRNA_1022|Chr1:265331904_265401005_-	0	0	2	2	5	0	0	3	2	2	3	0
circRNA_1023|Chr1:265511409_265514915_-	0	0	0	0	0	0	0	0	0	0	0	2
circRNA_1024|Chr1:265515390_265524404_-	2	0	0	0	0	0	0	5	2	2	2	2
circRNA_1025|Chr1:265518157_265524404_-	3	5	3	7	3	3	6	0	5	8	0	3
circRNA_1026|Chr1:265605456_265653628_-	0	0	3	0	0	0	0	3	0	3	5	4
circRNA_1027|Chr1:265646932_265653628_-	9	6	6	2	4	3	13	3	6	9	8	6
circRNA_1028|Chr1:265682535_265698923_-	0	0	0	0	0	0	0	4	0	2	3	2
circRNA_1029|Chr1:265709813_265735996_-	0	0	0	0	0	0	0	0	0	0	2	0
circRNA_1030|Chr1:265714699_265724208_-	3	0	2	7	5	0	0	3	0	2	0	3
circRNA_1031|Chr1:265724152_265729099_-	0	0	0	0	3	0	0	0	0	0	2	0
circRNA_1032|Chr1:265724152_265735996_-	3	0	0	0	0	0	0	0	0	0	0	0
circRNA_1033|Chr1:265728095_265733260_-	0	0	0	0	0	0	2	4	0	2	0	0
circRNA_1034|Chr1:265728095_265735996_-	0	0	0	0	3	0	2	0	2	0	0	0
circRNA_1035|Chr1:265824627_265826058_+	0	2	0	0	0	0	0	2	0	0	3	0
circRNA_1036|Chr1:266020777_266021582_+	2	0	0	2	0	4	0	0	3	0	0	0
circRNA_1037|Chr1:266201079_266202270_+	0	0	0	0	0	0	0	0	0	0	3	0
circRNA_1038|Chr1:266201079_266206952_+	0	0	0	0	3	0	0	0	0	2	0	0
circRNA_1039|Chr1:266487036_266500566_+	0	0	2	0	0	0	0	0	0	2	3	0
circRNA_1040|Chr1:266493863_266500566_+	0	0	0	0	3	0	0	0	0	0	0	0
circRNA_1041|Chr1:266862576_266862851_-	4	0	0	0	5	0	0	0	0	0	0	0
circRNA_1042|Chr1:266885442_266891213_+	0	0	0	0	0	0	0	3	0	0	0	0
circRNA_1043|Chr1:266896133_266897031_+	0	0	0	0	0	2	0	0	0	0	0	0
circRNA_1044|Chr1:266896133_266901162_+	0	0	0	0	2	0	0	0	0	0	0	0
circRNA_1045|Chr1:267063007_267092775_-	4	2	9	3	2	6	13	9	3	13	3	7
circRNA_1046|Chr1:267378101_267381291_+	0	0	0	0	0	0	0	0	0	2	0	0
circRNA_1047|Chr1:270300442_270364139_-	0	0	0	0	0	0	0	0	0	4	0	3
circRNA_1048|Chr1:270354534_270364139_-	0	0	0	0	0	0	0	0	0	3	0	0
circRNA_1049|Chr1:270360544_270426772_-	0	0	0	0	0	0	0	0	2	0	0	0
circRNA_1050|Chr1:273721648_273723172_-	2	0	0	0	0	5	0	2	0	0	0	0
circRNA_1051|Chr1:274628955_274634631_+	0	0	2	0	0	0	0	0	0	0	0	0
circRNA_1052|Chr1:274628955_274647456_+	0	0	0	0	0	0	0	0	2	3	0	0
circRNA_1053|Chr1:274688579_274701534_+	8	3	4	0	8	5	5	3	5	4	5	5
circRNA_1054|Chr1:274688579_274731695_+	2	0	0	0	0	0	0	2	0	0	0	0
circRNA_1055|Chr1:274700623_274701534_+	0	0	0	2	0	0	0	0	5	0	0	0
circRNA_1056|Chr1:274700623_274718538_+	0	0	3	0	0	3	0	0	0	0	0	0
circRNA_1057|Chr1:274700623_274731695_+	0	0	0	0	0	0	0	0	2	0	0	0
circRNA_1058|Chr1:275831816_275838095_-	2	0	0	0	0	0	0	0	0	0	0	0
circRNA_1059|Chr1:275846818_275876427_-	5	0	2	0	0	0	2	0	2	0	0	0
circRNA_1060|Chr1:275862373_275882447_-	2	0	0	0	0	0	0	0	0	0	0	0
circRNA_1061|Chr1:275866038_275876427_-	0	0	0	0	0	0	4	0	0	0	0	0
circRNA_1062|Chr1:276295100_276295378_-	0	0	2	0	0	0	0	0	0	0	2	0
circRNA_1063|Chr1:276295100_276296247_-	0	2	2	3	0	6	2	0	0	0	2	0
circRNA_1064|Chr1:276295100_276296984_-	0	0	0	3	0	0	0	0	0	0	0	0
circRNA_1065|Chr1:276373381_276384367_+	4	0	0	0	0	0	0	0	0	0	0	0
circRNA_1066|Chr1:277375162_277383623_+	0	0	0	0	0	0	0	2	0	0	0	0
circRNA_1067|Chr1:277379257_277383623_+	2	0	2	0	0	0	0	2	0	6	0	0
circRNA_1068|Chr1:277746760_277748764_-	0	0	0	0	3	0	0	0	0	0	0	0
circRNA_1069|Chr1:277952138_277953844_-	0	0	0	2	3	0	0	3	0	3	0	0
circRNA_1070|Chr1:277973988_277997007_-	6	0	2	0	0	0	3	0	0	0	0	0
circRNA_1071|Chr1:278580846_278590747_+	0	0	0	0	2	0	0	0	0	2	0	0
circRNA_1072|Chr1:278580846_278594581_+	25	0	13	5	11	7	15	15	6	14	6	8
circRNA_1073|Chr1:278580846_278620822_+	37	0	14	4	10	6	10	13	10	19	5	9
circRNA_1074|Chr1:278580846_278633931_+	5	0	0	0	0	0	0	0	0	0	0	0
circRNA_1075|Chr1:278580846_278639634_+	2	0	0	0	0	0	0	0	0	0	0	0
circRNA_1076|Chr1:278580846_278645812_+	2	0	0	0	0	0	0	0	0	0	0	0
circRNA_1077|Chr1:278580846_278661960_+	8	2	5	0	2	0	0	3	4	0	0	0
circRNA_1078|Chr1:278601852_278620822_+	0	0	0	0	0	0	0	2	0	0	0	0
circRNA_1079|Chr1:278656261_278701866_+	0	0	0	0	0	0	0	0	2	0	0	0
circRNA_1080|Chr1:278656261_278731755_+	4	0	2	3	3	0	2	2	0	2	0	0
circRNA_1081|Chr1:278679022_278701866_+	6	0	3	0	5	0	2	2	5	7	4	0
circRNA_1082|Chr1:278679022_278731755_+	3	0	2	0	2	5	0	4	2	4	0	0
circRNA_1083|Chr1:278679022_278749829_+	0	0	0	2	0	0	0	0	0	2	0	0
circRNA_1084|Chr1:278698312_278701866_+	5	0	5	4	3	2	0	5	2	4	5	4
circRNA_1085|Chr1:278698312_278731755_+	10	5	4	4	6	4	11	7	7	7	3	5
circRNA_1086|Chr1:278698312_278749829_+	18	10	16	4	11	10	9	17	9	16	8	6
circRNA_1087|Chr1:278698312_278773472_+	0	0	0	0	2	0	0	0	0	0	0	0
circRNA_1088|Chr1:278731694_278773472_+	3	0	6	0	3	2	3	2	0	0	0	0
circRNA_1089|Chr1:281071437_281095506_-	0	0	0	0	0	0	0	0	0	2	0	0
circRNA_1090|Chr1:281828605_281857037_-	0	0	0	4	2	0	0	0	0	0	0	0
circRNA_1091|Chr1:281834156_281857037_-	17	2	4	14	7	5	15	15	5	9	12	4
circRNA_1092|Chr1:282151347_282155817_-	0	0	0	0	0	3	2	0	0	0	0	0
circRNA_1093|Chr1:282152632_282153937_-	0	0	0	0	2	0	0	0	0	0	0	0
circRNA_1094|Chr1:282156811_282160859_-	0	0	0	2	0	0	0	0	0	0	0	0
circRNA_1095|Chr1:282190790_282202180_+	0	0	0	0	0	0	0	0	0	2	0	0
circRNA_1096|Chr1:282190790_282206870_+	0	0	0	0	0	0	0	0	0	2	0	0
circRNA_1097|Chr1:282194100_282198076_+	0	0	0	0	2	0	3	2	0	0	0	0
circRNA_1098|Chr1:282225916_282231487_-	0	0	0	2	0	0	0	0	0	3	3	0
circRNA_1099|Chr1:282490425_282498880_-	4	0	0	0	0	2	0	0	0	0	3	3
circRNA_1100|Chr10:574395_591107_-	0	0	0	0	0	0	0	3	0	0	0	0
circRNA_1101|Chr10:574395_593608_-	8	4	4	6	4	0	4	2	2	5	0	7
circRNA_1102|Chr10:574404_593608_-	0	0	0	0	0	0	0	0	0	0	0	2
circRNA_1103|Chr10:583446_593608_-	0	0	0	0	0	0	0	2	0	4	0	0
circRNA_1104|Chr10:590904_593608_-	0	3	0	0	6	2	0	3	0	2	0	0
circRNA_1105|Chr10:626473_633049_-	6	0	2	10	2	0	5	7	0	0	0	12
circRNA_1106|Chr10:776697_783836_+	2	0	0	8	3	3	5	5	4	3	5	7
circRNA_1107|Chr10:776697_792256_+	0	4	0	0	0	0	0	2	0	0	0	0
circRNA_1108|Chr10:776697_811636_+	2	0	0	0	0	0	0	0	0	0	0	0
circRNA_1109|Chr10:776884_783700_+	0	0	0	3	0	2	5	0	0	2	0	2
circRNA_1110|Chr10:776884_783703_+	0	0	2	2	2	0	0	0	3	2	0	4
circRNA_1111|Chr10:792229_808871_+	0	0	0	0	2	2	0	0	0	0	2	0
circRNA_1112|Chr10:796668_802135_+	0	0	0	0	8	0	0	0	0	0	4	0
circRNA_1113|Chr10:796668_819703_+	0	0	0	0	2	0	0	0	0	0	0	0
circRNA_1114|Chr10:800444_802135_+	0	4	2	2	0	0	0	0	0	0	0	0
circRNA_1115|Chr10:805713_835214_+	0	0	0	0	4	3	7	3	0	0	3	6
circRNA_1116|Chr10:807381_807559_-	0	0	0	0	0	0	0	0	2	0	0	0
circRNA_1117|Chr10:816459_822670_+	0	0	0	0	2	2	0	0	0	0	0	0
circRNA_1118|Chr10:819510_822670_+	0	0	2	0	0	0	0	0	0	0	0	0
circRNA_1119|Chr10:822068_835214_+	0	4	0	0	2	0	0	0	0	0	0	0
circRNA_1120|Chr10:840321_841807_-	0	0	0	3	0	0	0	0	0	0	0	0
circRNA_1121|Chr10:841855_843446_+	0	0	0	2	0	0	0	0	0	0	0	0
circRNA_1122|Chr10:849305_850239_+	0	0	0	0	0	0	0	0	0	0	0	3
circRNA_1123|Chr10:851177_852143_+	0	0	0	0	0	0	0	0	2	0	0	0
circRNA_1124|Chr10:858825_859055_-	0	2	0	0	0	0	0	0	0	0	0	0
circRNA_1125|Chr10:1160005_1214884_+	0	2	0	0	0	0	0	0	0	0	0	0
circRNA_1126|Chr10:1392225_1427639_-	0	0	0	0	0	2	0	0	0	0	0	0
circRNA_1127|Chr10:1413338_1419399_-	3	0	0	2	0	5	0	0	0	3	0	0
circRNA_1128|Chr10:1413338_1427639_-	0	0	0	0	0	0	2	0	2	3	0	0
circRNA_1129|Chr10:1435860_1442380_-	0	0	0	0	0	2	0	0	0	0	0	0
circRNA_1130|Chr10:1435860_1460698_-	0	0	0	2	2	0	0	0	0	0	0	2
circRNA_1131|Chr10:1464732_1480599_+	0	0	0	0	0	0	0	0	0	0	0	2
circRNA_1132|Chr10:1480444_1493208_+	0	0	0	0	0	0	0	0	0	0	3	0
circRNA_1133|Chr10:1491891_1493208_+	3	0	0	2	5	2	3	3	4	2	2	5
circRNA_1134|Chr10:1797152_1809004_-	0	0	0	0	0	3	3	0	2	0	0	0
circRNA_1135|Chr10:3172084_3207076_+	0	0	0	0	0	4	4	0	0	3	0	2
circRNA_1136|Chr10:3190125_3204962_+	0	0	0	0	0	0	0	0	0	2	0	2
circRNA_1137|Chr10:3191467_3204962_+	5	0	3	0	2	0	0	4	3	6	2	5
circRNA_1138|Chr10:3195923_3204962_+	0	0	0	0	0	0	0	0	2	0	0	0
circRNA_1139|Chr10:3195923_3207076_+	0	0	0	0	0	0	0	4	0	2	0	0
circRNA_1140|Chr10:3291427_3299078_-	0	0	0	4	0	0	0	0	0	0	0	0
circRNA_1141|Chr10:3298932_3304937_-	0	0	0	0	0	0	0	2	0	0	0	3
circRNA_1142|Chr10:3842058_3883978_-	0	0	0	0	0	0	2	0	0	0	0	0
circRNA_1143|Chr10:4140144_4172981_-	0	0	0	0	0	0	0	2	0	0	0	0
circRNA_1144|Chr10:4183171_4191496_-	0	0	0	0	2	0	2	0	0	4	0	3
circRNA_1145|Chr10:4183171_4213642_-	0	0	0	0	0	0	0	0	0	0	0	2
circRNA_1146|Chr10:4213518_4233192_-	0	0	0	0	0	0	0	0	0	0	0	2
circRNA_1147|Chr10:4555634_4556178_+	0	0	0	0	0	0	0	0	0	0	0	2
circRNA_1148|Chr10:4583896_4586616_+	0	0	0	0	0	0	3	0	0	2	0	0
circRNA_1149|Chr10:4583896_4592469_+	0	0	0	0	4	0	0	2	2	0	0	0
circRNA_1150|Chr10:4583896_4605111_+	0	0	0	6	0	5	0	0	0	0	0	3
circRNA_1151|Chr10:4586519_4605111_+	0	2	0	0	0	0	0	0	0	2	2	0
circRNA_1152|Chr10:4624614_4625498_+	2	2	0	2	3	6	5	2	3	4	3	4
circRNA_1153|Chr10:4624614_4629886_+	11	16	20	22	19	28	26	23	13	25	18	25
circRNA_1154|Chr10:5004064_5005328_-	0	0	0	0	0	0	2	0	0	0	0	0
circRNA_1155|Chr10:5004603_5005328_-	0	0	0	0	0	0	3	0	0	0	0	0
circRNA_1156|Chr10:5004603_5016350_-	2	3	0	0	3	0	0	0	0	0	0	0
circRNA_1157|Chr10:5049168_5130612_-	0	0	0	0	2	0	0	0	0	0	0	0
circRNA_1158|Chr10:5100271_5130612_-	0	0	3	0	3	3	0	3	3	2	0	3
circRNA_1159|Chr10:5127520_5179352_-	2	0	0	0	0	0	0	0	0	0	0	3
circRNA_1160|Chr10:5144670_5179352_-	0	0	0	0	0	0	0	2	0	0	0	0
circRNA_1161|Chr10:5159967_5179352_-	0	0	0	0	0	0	2	0	0	0	0	0
circRNA_1162|Chr10:5159967_5183141_-	0	0	0	0	0	0	0	0	0	0	2	2
circRNA_1163|Chr10:5174311_5179352_-	0	0	0	0	0	0	0	0	0	2	0	0
circRNA_1164|Chr10:5174311_5183141_-	0	0	0	0	2	0	0	0	0	0	0	0
circRNA_1165|Chr10:6858307_6858582_-	0	0	0	2	0	0	0	0	4	2	2	0
circRNA_1166|Chr10:6991635_6992636_+	3	4	5	3	4	7	14	8	0	6	6	5
circRNA_1167|Chr10:7229937_7231476_-	0	0	0	0	0	0	2	0	0	0	2	0
circRNA_1168|Chr10:9233537_9248214_-	0	0	0	0	0	0	0	0	0	0	2	0
circRNA_1169|Chr10:10811936_10814828_+	2	0	0	0	0	0	0	2	2	5	2	0
circRNA_1170|Chr10:10837817_10839412_-	0	7	4	9	5	0	0	3	0	2	2	5
circRNA_1171|Chr10:10854701_10857739_-	5	0	9	16	4	8	9	5	5	7	8	12
circRNA_1172|Chr10:10857070_10857725_+	0	0	0	0	0	0	0	0	0	0	2	0
circRNA_1173|Chr10:11138696_11143561_+	0	0	0	3	0	0	0	0	0	0	0	0
circRNA_1174|Chr10:11487678_11496286_+	0	0	0	0	0	0	0	2	0	2	0	0
circRNA_1175|Chr10:11626519_11627228_+	7	2	4	5	3	2	6	5	5	3	7	5
circRNA_1176|Chr10:11626519_11651092_+	0	0	3	0	0	2	2	0	0	0	2	0
circRNA_1177|Chr10:11650916_11670969_+	0	0	0	0	0	0	4	0	0	0	0	0
circRNA_1178|Chr10:11856924_11874610_-	0	0	3	0	0	0	2	3	0	0	0	0
circRNA_1179|Chr10:13157726_13157869_-	0	0	0	0	0	0	0	0	0	2	0	0
circRNA_1180|Chr10:13157825_13158069_+	0	0	0	0	2	0	0	0	0	0	0	0
circRNA_1181|Chr10:13464532_13472788_-	0	0	0	0	0	0	0	0	0	2	0	0
circRNA_1182|Chr10:13487742_13488841_+	0	2	0	0	0	0	0	0	0	0	0	0
circRNA_1183|Chr10:13734909_13739242_+	0	0	0	0	0	0	2	0	0	0	0	0
circRNA_1184|Chr10:13737926_13747119_+	0	0	0	0	0	0	0	0	0	0	2	0
circRNA_1185|Chr10:13931236_13933066_+	0	0	0	2	3	0	2	0	0	0	2	0
circRNA_1186|Chr10:13931236_13935484_+	0	0	0	0	0	0	0	0	2	0	4	5
circRNA_1187|Chr10:13938652_13944844_+	0	0	0	2	0	0	2	0	0	2	0	3
circRNA_1188|Chr10:13944932_13945211_+	2	0	10	3	4	5	5	3	4	2	3	2
circRNA_1189|Chr10:13951916_13954281_+	0	0	0	2	0	0	0	0	0	0	0	0
circRNA_1190|Chr10:13957609_13959133_+	0	0	0	0	0	0	0	0	0	2	0	0
circRNA_1191|Chr10:13973126_13973774_-	0	2	0	2	0	0	3	0	0	3	0	0
circRNA_1192|Chr10:14108382_14108999_+	0	0	6	0	5	4	5	2	6	4	2	3
circRNA_1193|Chr10:14262931_14263348_-	0	0	0	0	0	0	0	0	0	0	0	2
circRNA_1194|Chr10:14268878_14269461_-	0	0	0	0	0	0	0	0	0	2	0	0
circRNA_1195|Chr10:14268878_14278673_-	0	0	0	0	0	0	0	0	2	0	0	0
circRNA_1196|Chr10:14271730_14278673_-	0	0	2	0	0	0	0	0	0	0	2	0
circRNA_1197|Chr10:14560970_14577329_+	0	0	3	0	0	0	0	0	0	0	0	0
circRNA_1198|Chr10:14570115_14572429_+	0	0	0	0	0	0	2	0	0	0	0	0
circRNA_1199|Chr10:14570115_14587347_+	0	0	0	0	3	0	2	0	0	0	0	0
circRNA_1200|Chr10:14587922_14589453_+	2	0	0	0	0	0	0	0	0	0	0	0
circRNA_1201|Chr10:15358869_15376292_-	0	0	0	0	0	0	2	3	0	2	0	0
circRNA_1202|Chr10:15373621_15385066_-	0	2	0	0	0	0	0	2	2	0	0	0
circRNA_1203|Chr10:15489266_15491749_+	0	0	0	3	2	0	2	0	0	2	0	2
circRNA_1204|Chr10:15489645_15490668_+	0	0	2	0	0	0	0	0	0	0	0	2
circRNA_1205|Chr10:15544776_15555433_+	0	0	0	0	0	0	0	0	0	3	0	0
circRNA_1206|Chr10:15577563_15603016_-	0	0	0	0	0	0	0	0	0	0	9	0
circRNA_1207|Chr10:15678475_15678823_+	0	0	2	0	0	0	0	0	0	0	0	0
circRNA_1208|Chr10:15989960_15998622_-	0	0	0	0	0	0	0	2	0	0	0	0
circRNA_1209|Chr10:16699071_16730140_-	0	0	4	0	0	3	2	0	0	2	0	0
circRNA_1210|Chr10:16706378_16730140_-	0	0	3	0	0	4	0	0	0	7	3	3
circRNA_1211|Chr10:16724062_16725151_-	0	0	0	0	0	0	0	0	0	2	0	0
circRNA_1212|Chr10:16724062_16727861_-	2	0	3	3	0	3	0	0	7	0	3	0
circRNA_1213|Chr10:16724062_16730113_-	0	0	0	0	0	0	0	0	0	0	2	0
circRNA_1214|Chr10:16724062_16730140_-	73	30	49	104	106	72	77	76	95	106	79	86
circRNA_1215|Chr10:16724062_16731902_-	0	0	0	0	0	0	0	0	2	2	0	2
circRNA_1216|Chr10:16727736_16730140_-	0	0	0	0	0	0	0	0	0	3	0	0
circRNA_1217|Chr10:16769713_16774652_-	3	7	3	6	6	12	6	7	3	3	13	4
circRNA_1218|Chr10:17236569_17252643_+	0	0	0	0	0	0	0	0	0	2	0	0
circRNA_1219|Chr10:17605287_17609971_+	0	0	0	0	0	0	0	0	0	0	0	2
circRNA_1220|Chr10:17619518_17621198_+	0	0	0	0	0	0	0	0	0	0	2	0
circRNA_1221|Chr10:18208748_18238570_-	0	0	0	2	0	0	0	0	2	0	0	0
circRNA_1222|Chr10:18208748_18258433_-	0	0	0	0	0	0	0	0	3	2	0	0
circRNA_1223|Chr10:18218676_18238682_-	7	3	12	27	13	13	37	14	10	23	19	16
circRNA_1224|Chr10:18224064_18258433_-	0	0	0	0	0	3	0	0	0	0	0	0
circRNA_1225|Chr10:18238462_18258433_-	0	0	0	6	5	3	4	4	6	7	6	0
circRNA_1226|Chr10:18326421_18371502_-	0	0	0	0	0	0	3	0	0	0	0	0
circRNA_1227|Chr10:18359720_18402658_-	0	0	0	0	0	0	4	2	0	0	0	3
circRNA_1228|Chr10:18359720_18435415_-	0	2	0	0	2	3	4	0	0	2	0	0
circRNA_1229|Chr10:18371397_18402658_-	0	0	0	0	0	0	0	0	0	0	0	2
circRNA_1230|Chr10:18396548_18408507_-	0	2	0	0	2	2	0	0	0	0	0	0
circRNA_1231|Chr10:18396548_18408534_-	4	4	5	10	5	6	12	6	5	8	4	12
circRNA_1232|Chr10:18396548_18435415_-	0	0	0	0	0	4	2	2	0	0	3	0
circRNA_1233|Chr10:18415562_18435415_-	2	0	2	0	0	0	0	0	0	0	2	2
circRNA_1234|Chr10:18983478_18984127_+	0	0	0	0	0	0	2	3	0	2	0	0
circRNA_1235|Chr10:19937528_19979727_+	0	0	0	0	0	0	2	0	0	0	0	0
circRNA_1236|Chr10:19973258_19979727_+	0	0	0	0	0	2	0	0	0	0	0	0
circRNA_1237|Chr10:19973258_20036518_+	2	0	0	3	0	3	4	2	0	0	0	0
circRNA_1238|Chr10:20321532_20392169_+	0	0	0	0	2	0	0	0	0	2	2	0
circRNA_1239|Chr10:20377589_20392169_+	0	0	0	2	0	0	0	0	0	0	0	0
circRNA_1240|Chr10:20377589_20411468_+	2	0	0	0	0	0	0	3	0	0	0	3
circRNA_1241|Chr10:20401567_20411468_+	0	0	0	2	0	0	0	0	0	0	0	0
circRNA_1242|Chr10:20422464_20424134_+	0	0	0	0	2	2	3	0	0	0	3	0
circRNA_1243|Chr10:20643645_20650099_-	0	0	0	2	0	0	0	0	0	0	0	0
circRNA_1244|Chr10:20647289_20650957_-	0	0	0	0	0	0	0	3	0	0	0	0
circRNA_1245|Chr10:21189518_21216881_-	0	0	0	0	0	0	0	0	0	0	0	5
circRNA_1246|Chr10:23812162_23814866_+	0	0	0	0	0	0	0	2	0	0	0	0
circRNA_1247|Chr10:23914914_23952943_+	0	0	0	0	0	0	2	0	0	0	0	0
circRNA_1248|Chr10:23914914_23969136_+	0	2	3	2	0	4	2	4	3	4	4	5
circRNA_1249|Chr10:23952810_23969136_+	0	0	0	0	0	3	2	0	0	2	0	2
circRNA_1250|Chr10:23952813_23969136_+	2	3	4	0	6	0	4	2	8	0	2	0
circRNA_1251|Chr10:29038498_29040713_+	0	0	0	3	0	2	0	0	2	2	3	0
circRNA_1252|Chr10:29318809_29319752_+	42	29	39	43	42	69	55	47	36	33	42	57
circRNA_1253|Chr10:29318809_29326665_+	0	0	2	0	0	0	2	0	0	0	0	0
circRNA_1254|Chr10:29318809_29330456_+	7	8	4	7	4	6	0	3	4	5	8	7
circRNA_1255|Chr10:29318809_29333371_+	0	0	0	2	0	0	0	0	0	0	0	0
circRNA_1256|Chr10:30980709_30984601_+	0	0	0	0	0	0	0	2	0	0	0	0
circRNA_1257|Chr10:30980709_30988908_+	0	0	0	0	0	0	0	2	0	0	0	0
circRNA_1258|Chr10:30980709_30993573_+	7	3	7	11	2	2	6	4	5	5	7	2
circRNA_1259|Chr10:31916664_31917170_+	0	0	0	2	0	0	0	0	0	0	0	0
circRNA_1260|Chr10:32215157_32280022_-	0	0	2	0	0	2	0	0	0	5	0	0
circRNA_1261|Chr10:35455049_35457781_+	0	0	0	0	0	0	0	0	0	3	0	0
circRNA_1262|Chr10:35664560_35665657_+	0	0	0	0	0	0	0	0	0	0	2	0
circRNA_1263|Chr10:35815476_35819778_-	9	10	22	16	11	22	26	19	24	17	21	18
circRNA_1264|Chr10:35816390_35817012_-	0	0	0	0	2	0	0	4	2	0	0	0
circRNA_1265|Chr10:35816390_35818308_-	0	0	0	0	0	0	0	0	6	3	0	0
circRNA_1266|Chr10:35818250_35819778_-	0	0	0	0	0	2	0	0	0	0	0	0
circRNA_1267|Chr10:35876013_35876397_+	27	22	22	19	37	30	37	29	42	47	28	18
circRNA_1268|Chr10:35876034_35876397_+	7	8	13	15	12	14	22	16	26	18	16	13
circRNA_1269|Chr10:37158164_37164366_-	2	0	0	0	0	0	0	0	0	0	0	0
circRNA_1270|Chr10:37158164_37172772_-	0	0	3	0	0	0	0	0	0	0	0	0
circRNA_1271|Chr10:37158164_37178344_-	0	0	0	0	0	0	0	0	0	0	2	0
circRNA_1272|Chr10:37158164_37185721_-	0	0	0	0	0	0	2	0	0	0	0	0
circRNA_1273|Chr10:37163046_37166187_-	3	0	0	0	0	0	0	0	0	0	0	0
circRNA_1274|Chr10:37163046_37172772_-	0	0	0	2	0	0	0	0	0	0	0	0
circRNA_1275|Chr10:37166067_37178344_-	4	0	0	0	0	0	0	3	0	2	0	0
circRNA_1276|Chr10:37167400_37172772_-	0	0	0	0	0	0	3	0	0	0	0	2
circRNA_1277|Chr10:37180938_37185721_-	2	0	2	6	0	2	0	0	0	3	3	3
circRNA_1278|Chr10:37183342_37185721_-	0	0	0	0	0	0	0	0	0	5	0	0
circRNA_1279|Chr10:37486425_37488000_+	2	0	0	0	0	0	0	0	0	0	0	0
circRNA_1280|Chr10:37764317_37764822_+	0	2	0	5	2	5	2	7	8	0	2	2
circRNA_1281|Chr10:38617281_38633058_-	0	0	3	0	0	2	0	0	0	0	0	0
circRNA_1282|Chr10:38622808_38633058_-	5	3	5	10	2	4	10	2	9	6	8	10
circRNA_1283|Chr10:38622808_38634729_-	0	0	0	0	0	0	0	0	0	0	0	4
circRNA_1284|Chr10:38625387_38633058_-	0	0	0	0	0	2	0	0	0	0	2	2
circRNA_1285|Chr10:38628448_38633058_-	2	0	0	0	0	0	0	0	0	0	0	0
circRNA_1286|Chr10:38704609_38720071_+	0	0	0	0	3	0	0	3	0	0	0	0
circRNA_1287|Chr10:38712831_38720071_+	2	0	4	3	6	3	0	2	6	0	3	5
circRNA_1288|Chr10:38712831_38725063_+	2	0	0	0	3	2	2	3	2	3	2	0
circRNA_1289|Chr10:38747739_38758073_+	0	0	0	0	0	0	0	0	0	0	3	0
circRNA_1290|Chr10:38756473_38759832_+	0	0	0	0	0	0	2	2	0	0	0	0
circRNA_1291|Chr10:38892607_38893367_+	0	3	2	2	0	3	3	3	0	0	3	2
circRNA_1292|Chr10:39125159_39129794_-	0	0	0	0	0	0	0	0	0	0	0	3
circRNA_1293|Chr10:39125171_39127540_-	0	0	0	0	2	0	0	0	0	0	0	0
circRNA_1294|Chr10:39125171_39129794_-	0	0	3	2	3	0	2	3	6	3	0	0
circRNA_1295|Chr10:39457602_39462065_+	3	0	0	0	0	2	0	0	0	0	0	0
circRNA_1296|Chr10:39683306_39705408_+	0	0	0	0	0	0	0	0	0	0	2	0
circRNA_1297|Chr10:39842092_39847000_+	0	0	0	0	2	0	0	0	0	0	0	0
circRNA_1298|Chr10:39896705_39923049_+	0	0	0	0	0	0	0	0	0	0	0	2
circRNA_1299|Chr10:40270368_40281737_-	0	0	2	0	0	0	0	0	0	0	0	0
circRNA_1300|Chr10:40327260_40334408_-	0	2	0	0	0	3	0	0	0	2	0	0
circRNA_1301|Chr10:40336236_40336606_+	0	0	0	0	2	0	0	0	2	0	0	0
circRNA_1302|Chr10:40502095_40514834_-	0	0	0	0	0	0	0	0	3	0	0	0
circRNA_1303|Chr10:40742456_40742598_+	0	0	0	2	0	0	0	0	0	0	3	0
circRNA_1304|Chr10:42919407_42928478_-	0	0	0	0	0	0	0	0	2	0	0	0
circRNA_1305|Chr10:43142689_43158515_+	0	0	0	0	0	4	0	0	0	0	0	0
circRNA_1306|Chr10:43227922_43229953_+	0	2	3	0	0	2	0	0	2	3	4	2
circRNA_1307|Chr10:43227922_43231708_+	0	0	0	0	0	2	0	2	0	3	3	0
circRNA_1308|Chr10:43504523_43509133_-	5	4	6	4	4	10	11	7	2	9	4	8
circRNA_1309|Chr10:43512009_43512284_-	5	3	4	5	3	3	0	0	3	2	2	3
circRNA_1310|Chr10:43539793_43542903_+	0	0	0	0	0	0	2	0	0	0	2	0
circRNA_1311|Chr10:43539819_43542903_+	0	0	3	4	3	3	3	0	4	2	3	0
circRNA_1312|Chr10:43539819_43547905_+	0	0	0	0	0	0	0	3	0	0	0	0
circRNA_1313|Chr10:43572343_43572697_-	0	0	0	0	2	0	5	0	0	0	0	0
circRNA_1314|Chr10:45771832_45778634_-	0	0	2	0	0	0	0	0	2	2	0	0
circRNA_1315|Chr10:46097465_46100778_+	0	0	0	2	0	2	0	3	2	0	0	0
circRNA_1316|Chr10:46098067_46100778_+	0	0	0	0	0	0	2	0	2	3	0	0
circRNA_1317|Chr10:46101744_46129892_+	0	0	5	4	3	5	4	2	0	5	2	2
circRNA_1318|Chr10:46193279_46194858_-	0	0	0	0	0	0	0	0	0	3	0	4
circRNA_1319|Chr10:46630462_46634923_-	0	2	0	0	0	0	0	0	0	0	0	0
circRNA_1320|Chr10:46630462_46646542_-	0	0	0	0	0	0	2	0	0	0	3	0
circRNA_1321|Chr10:46641975_46646542_-	0	0	0	0	2	0	2	0	0	4	0	0
circRNA_1322|Chr10:46732292_46739970_+	0	0	0	0	3	3	0	0	0	0	0	0
circRNA_1323|Chr10:46771409_46776306_-	0	2	2	2	5	11	8	3	9	3	7	4
circRNA_1324|Chr10:46824807_46826650_+	4	2	5	3	8	12	6	10	5	12	5	8
circRNA_1325|Chr10:46963252_46963494_+	0	0	2	0	2	0	0	0	0	2	0	0
circRNA_1326|Chr10:46999897_47004106_-	0	0	3	0	0	0	0	0	0	4	0	0
circRNA_1327|Chr10:47810268_47812997_-	0	0	0	0	2	0	0	0	0	0	0	0
circRNA_1328|Chr10:47824460_47826701_-	0	0	0	3	0	0	0	0	0	0	0	0
circRNA_1329|Chr10:48010564_48035208_-	0	0	0	0	2	0	0	0	0	0	0	0
circRNA_1330|Chr10:48015493_48035208_-	0	0	0	0	0	0	3	0	0	0	0	2
circRNA_1331|Chr10:48022762_48039001_-	3	0	2	3	2	3	0	0	0	0	3	3
circRNA_1332|Chr10:48027221_48035208_-	0	0	0	0	0	0	0	0	0	0	0	3
circRNA_1333|Chr10:48055151_48057791_-	0	0	0	0	0	0	0	0	4	0	0	2
circRNA_1334|Chr10:48064062_48077786_-	0	0	0	0	0	0	2	0	0	0	0	0
circRNA_1335|Chr10:48084987_48105913_-	0	0	0	0	0	0	0	0	0	0	2	0
circRNA_1336|Chr10:48101263_48110883_-	0	0	0	0	0	0	2	0	0	0	0	0
circRNA_1337|Chr10:48101263_48113169_-	0	0	0	0	0	0	0	0	0	3	0	0
circRNA_1338|Chr10:48109533_48110883_-	0	0	0	0	0	0	0	0	0	2	0	0
circRNA_1339|Chr10:48109533_48125139_-	2	0	2	2	0	0	0	0	0	2	0	2
circRNA_1340|Chr10:48165219_48179056_-	0	0	0	0	0	0	2	0	0	0	0	0
circRNA_1341|Chr10:48165219_48194542_-	0	0	2	0	0	0	0	4	0	4	5	0
circRNA_1342|Chr10:48165219_48200848_-	2	0	0	2	0	0	2	0	3	3	3	0
circRNA_1343|Chr10:48172858_48194542_-	0	0	0	0	0	0	0	0	0	0	2	0
circRNA_1344|Chr10:48178920_48194542_-	0	0	0	2	0	0	0	0	0	0	0	0
circRNA_1345|Chr10:48178920_48200848_-	0	0	2	0	0	0	0	0	0	0	0	0
circRNA_1346|Chr10:48182246_48193337_-	0	0	0	0	2	0	0	0	0	0	0	0
circRNA_1347|Chr10:48188215_48200848_-	0	0	0	0	0	0	0	0	0	2	0	0
circRNA_1348|Chr10:48418262_48419844_+	0	0	0	6	2	6	4	5	2	2	8	0
circRNA_1349|Chr10:48418262_48438287_+	2	0	0	2	3	0	3	0	0	3	2	2
circRNA_1350|Chr10:48433396_48438287_+	0	0	0	0	0	0	0	0	0	0	0	3
circRNA_1351|Chr10:48433396_48453602_+	0	0	0	0	0	0	0	0	0	2	0	0
circRNA_1352|Chr10:48452001_48453602_+	0	0	0	0	0	0	0	0	3	0	0	0
circRNA_1353|Chr10:48452001_48470732_+	9	7	4	4	10	5	5	6	2	8	5	3
circRNA_1354|Chr10:48452001_48484868_+	8	2	3	5	0	6	2	6	0	7	6	2
circRNA_1355|Chr10:48452001_48522898_+	0	3	2	0	2	2	0	0	0	2	0	0
circRNA_1356|Chr10:48452001_48528848_+	0	0	2	0	2	6	0	3	4	0	0	3
circRNA_1357|Chr10:48460656_48470732_+	0	2	0	2	2	3	6	4	2	3	4	4
circRNA_1358|Chr10:48460656_48484868_+	0	0	2	4	2	2	3	2	5	2	0	2
circRNA_1359|Chr10:48460656_48522898_+	0	0	0	0	0	0	3	0	0	0	0	0
circRNA_1360|Chr10:48460656_48528848_+	0	0	0	0	0	2	2	0	0	0	0	0
circRNA_1361|Chr10:48465317_48528848_+	0	0	0	2	0	2	0	0	0	0	0	0
circRNA_1362|Chr10:48479453_48528848_+	0	0	0	0	3	0	0	0	0	0	0	3
circRNA_1363|Chr10:48659695_48684111_-	0	0	0	0	2	0	0	0	0	0	0	0
circRNA_1364|Chr10:48659695_48684279_-	4	0	0	0	0	0	0	4	3	5	0	0
circRNA_1365|Chr10:48670421_48684279_-	2	0	0	0	0	2	0	4	0	0	2	3
circRNA_1366|Chr10:48671385_48684279_-	3	0	0	0	0	2	0	0	0	0	2	0
circRNA_1367|Chr10:48728451_48753281_-	0	0	2	0	0	5	0	0	0	3	0	0
circRNA_1368|Chr10:48749746_48753281_-	2	0	0	2	4	3	7	9	0	3	4	0
circRNA_1369|Chr10:50527421_50562722_-	0	0	0	0	0	0	0	2	0	0	0	0
circRNA_1370|Chr10:51505136_51511905_-	0	0	0	0	0	0	0	0	0	0	0	3
circRNA_1371|Chr10:51710183_51734014_-	0	0	0	0	0	3	4	3	5	3	0	0
circRNA_1372|Chr10:51710183_51739115_-	0	0	2	0	2	0	2	2	0	3	0	2
circRNA_1373|Chr10:51724607_51729490_-	3	0	2	4	10	3	6	6	5	5	2	4
circRNA_1374|Chr10:51724607_51734014_-	15	9	0	20	17	28	21	25	11	13	19	26
circRNA_1375|Chr10:51724607_51739115_-	31	29	48	60	60	77	53	63	48	45	76	51
circRNA_1376|Chr10:51724607_51756561_-	0	0	0	0	0	0	2	0	0	0	0	0
circRNA_1377|Chr10:53717235_53782993_+	0	0	0	0	0	0	3	0	0	0	0	0
circRNA_1378|Chr10:53764351_53800571_+	0	0	0	0	0	0	0	0	6	0	0	0
circRNA_1379|Chr10:53786927_53827994_+	0	0	0	0	0	0	3	0	0	0	0	0
circRNA_1380|Chr10:54421637_54430758_-	0	0	0	0	0	0	0	2	0	0	0	0
circRNA_1381|Chr10:54806572_54825602_-	0	0	0	0	0	0	0	0	0	3	0	0
circRNA_1382|Chr10:55349536_55362785_+	0	0	2	0	0	2	2	2	0	3	3	0
circRNA_1383|Chr10:55419844_55430530_-	0	0	0	0	0	2	0	0	0	0	0	0
circRNA_1384|Chr10:55419844_55436069_-	3	0	2	0	0	0	2	5	2	4	0	0
circRNA_1385|Chr10:55423343_55436069_-	0	0	0	0	0	0	3	0	0	0	0	0
circRNA_1386|Chr10:55944240_55944443_+	0	0	0	0	0	2	0	0	0	0	0	0
circRNA_1387|Chr10:55971256_55974078_+	0	0	0	3	0	0	0	0	0	0	2	0
circRNA_1388|Chr10:56008810_56009454_-	0	0	0	2	0	0	0	3	2	0	2	0
circRNA_1389|Chr10:56008810_56010214_-	0	0	0	0	0	0	2	0	0	0	0	0
circRNA_1390|Chr10:56291051_56291212_+	0	0	0	3	0	0	0	0	0	0	0	0
circRNA_1391|Chr10:56619650_56620045_-	3	0	7	4	4	0	4	4	2	2	0	3
circRNA_1392|Chr10:56844803_56844962_+	0	0	0	0	0	0	0	0	0	0	2	0
circRNA_1393|Chr10:57232360_57232844_-	0	0	0	0	2	0	0	0	0	0	0	0
circRNA_1394|Chr10:57236768_57237168_+	0	0	0	0	0	0	4	0	0	0	2	0
circRNA_1395|Chr10:57505175_57541484_+	0	0	0	0	0	0	0	0	0	0	2	0
circRNA_1396|Chr10:57508985_57520192_+	0	0	0	0	0	0	0	0	0	2	2	0
circRNA_1397|Chr10:57508985_57541484_+	2	0	0	0	2	0	0	0	0	0	0	0
circRNA_1398|Chr10:57549452_57549919_+	4	2	5	8	4	0	0	9	2	3	7	3
circRNA_1399|Chr10:57549452_57551449_+	2	0	0	0	0	0	0	0	0	0	0	0
circRNA_1400|Chr10:57549452_57557666_+	0	0	0	0	0	0	2	2	0	0	0	0
circRNA_1401|Chr10:57549452_57563686_+	3	0	2	2	3	0	0	0	3	3	0	6
circRNA_1402|Chr10:57551345_57563686_+	0	0	0	0	0	0	0	0	0	3	0	0
circRNA_1403|Chr10:57610281_57611309_+	0	0	0	2	2	4	0	2	0	4	2	2
circRNA_1404|Chr10:57627261_57628614_-	0	0	0	2	0	0	0	0	2	2	0	0
circRNA_1405|Chr10:57627261_57634588_-	4	0	0	0	3	6	2	0	0	2	0	0
circRNA_1406|Chr10:57634023_57634588_-	11	12	10	13	9	12	16	20	12	18	13	14
circRNA_1407|Chr10:59192184_59239990_+	0	0	0	2	0	0	0	0	0	0	0	0
circRNA_1408|Chr10:59229921_59248353_+	0	0	0	3	0	0	2	0	0	0	0	0
circRNA_1409|Chr10:59294314_59298784_+	19	8	7	13	8	23	17	12	7	16	13	14
circRNA_1410|Chr10:59423266_59441831_+	8	5	4	13	9	23	13	8	2	7	9	14
circRNA_1411|Chr10:59434626_59441831_+	3	0	0	0	0	0	0	0	0	0	0	0
circRNA_1412|Chr10:59486724_59488077_+	0	0	0	0	2	0	0	0	0	0	3	4
circRNA_1413|Chr10:59496145_59497395_+	0	0	2	2	2	0	0	0	0	0	0	0
circRNA_1414|Chr10:59729513_59732683_+	0	0	0	0	2	0	0	0	0	0	0	0
circRNA_1415|Chr10:59730744_59735662_+	0	0	0	3	0	0	0	2	0	2	0	0
circRNA_1416|Chr10:61207781_61217982_-	0	3	0	0	0	0	4	0	0	2	0	0
circRNA_1417|Chr10:61230757_61236946_-	0	0	0	2	0	0	0	2	0	0	0	2
circRNA_1418|Chr10:61461420_61498597_-	4	0	2	4	2	7	4	0	0	3	2	6
circRNA_1419|Chr10:61464686_61498597_-	2	3	0	6	5	6	3	9	0	6	5	4
circRNA_1420|Chr10:61483520_61498597_-	0	0	0	0	0	2	2	0	2	0	0	0
circRNA_1421|Chr10:61498389_61498597_-	0	0	0	0	0	0	0	0	0	2	0	0
circRNA_1422|Chr10:61498389_61509086_-	0	0	2	0	0	3	0	0	0	2	0	2
circRNA_1423|Chr10:61648582_61658848_+	0	0	2	0	0	0	0	0	0	0	0	0
circRNA_1424|Chr10:61648582_61660003_+	0	0	0	0	0	0	0	0	4	0	0	0
circRNA_1425|Chr10:61785351_61831887_+	0	2	0	0	0	0	0	0	0	0	0	0
circRNA_1426|Chr10:61823000_61831887_+	0	0	0	0	0	2	2	0	0	0	0	0
circRNA_1427|Chr10:61882916_61885796_+	8	10	12	12	25	21	23	26	13	18	31	27
circRNA_1428|Chr10:61882916_61897730_+	5	2	0	0	3	6	5	0	0	6	2	8
circRNA_1429|Chr10:62223768_62224929_+	0	0	0	0	0	0	0	2	0	0	0	0
circRNA_1430|Chr10:62223768_62237402_+	0	0	0	0	0	0	0	0	2	0	0	0
circRNA_1431|Chr10:62536134_62575768_+	0	0	2	0	0	0	0	0	0	0	0	0
circRNA_1432|Chr10:62540625_62574892_+	0	0	0	0	0	2	0	0	2	0	0	0
circRNA_1433|Chr10:62540625_62581037_+	6	2	2	3	6	2	4	2	3	3	4	4
circRNA_1434|Chr10:62566642_62575768_+	5	4	5	5	4	6	7	5	6	3	7	0
circRNA_1435|Chr10:62566642_62581037_+	2	0	0	3	0	3	4	5	2	5	3	5
circRNA_1436|Chr10:62566642_62609205_+	0	0	0	0	0	0	0	0	2	0	0	0
circRNA_1437|Chr10:62574791_62581037_+	0	0	0	0	2	0	3	0	0	0	0	0
circRNA_1438|Chr10:62604214_62607374_+	0	0	0	0	0	0	0	0	0	2	0	0
circRNA_1439|Chr10:62604214_62609205_+	2	0	0	0	0	0	0	0	0	0	4	0
circRNA_1440|Chr10:62623758_62664462_-	60	47	60	47	61	69	60	66	71	69	66	61
circRNA_1441|Chr10:62733307_62737390_-	0	0	0	0	0	0	0	2	0	3	0	0
circRNA_1442|Chr10:62751173_62767418_-	0	0	2	3	0	2	3	4	0	3	0	0
circRNA_1443|Chr10:63213864_63220396_-	0	0	0	0	0	0	0	0	0	3	0	0
circRNA_1444|Chr10:63332239_63332486_+	10	3	8	11	11	8	10	10	10	11	11	13
circRNA_1445|Chr10:63357647_63359577_+	0	0	0	2	0	0	0	0	0	0	0	0
circRNA_1446|Chr10:63412175_63412639_+	0	0	0	0	0	4	0	0	0	0	0	4
circRNA_1447|Chr10:63412175_63416200_+	0	0	0	0	0	0	0	2	0	0	0	0
circRNA_1448|Chr10:63412175_63418716_+	2	3	0	0	0	4	0	0	0	0	0	0
circRNA_1449|Chr10:63812224_63812622_+	0	0	0	2	0	4	0	0	0	0	2	0
circRNA_1450|Chr10:63840178_63840996_+	0	0	0	0	0	0	0	2	0	0	0	0
circRNA_1451|Chr10:63840178_63841166_+	0	0	2	0	2	0	0	0	0	0	0	0
circRNA_1452|Chr10:63840631_63841166_+	4	0	2	0	0	0	3	0	5	0	0	0
circRNA_1453|Chr10:63908528_63915032_+	5	0	2	3	3	2	6	3	0	3	0	4
circRNA_1454|Chr10:64387405_64388891_-	2	0	0	0	0	0	0	0	0	0	0	0
circRNA_1455|Chr10:64387405_64395463_-	0	0	0	0	0	0	0	0	2	0	0	0
circRNA_1456|Chr10:64425984_64431795_-	0	0	3	0	0	0	0	0	0	0	0	0
circRNA_1457|Chr10:64600135_64657079_-	0	0	0	0	0	2	0	0	0	0	0	0
circRNA_1458|Chr10:64611820_64616753_-	0	0	0	2	0	0	0	0	0	0	0	0
circRNA_1459|Chr10:64620312_64634639_-	0	0	0	0	0	0	3	0	0	0	0	0
circRNA_1460|Chr10:64626665_64634639_-	0	0	2	0	0	0	0	0	2	0	0	0
circRNA_1461|Chr10:65025196_65026738_-	0	0	0	4	4	2	0	5	2	0	2	0
circRNA_1462|Chr10:65065614_65066693_-	0	0	0	2	0	0	0	0	0	0	0	0
circRNA_1463|Chr10:65807775_65808260_+	5	6	3	6	5	5	15	12	6	0	6	9
circRNA_1464|Chr10:65861838_65862953_-	0	5	0	0	0	0	0	0	0	2	0	0
circRNA_1465|Chr10:65886934_65896816_-	0	0	0	0	0	0	0	2	0	0	0	0
circRNA_1466|Chr10:66595570_66597359_-	3	6	7	7	8	14	8	7	5	7	13	10
circRNA_1467|Chr10:66732462_66734900_+	0	0	0	0	0	0	0	0	0	2	0	0
circRNA_1468|Chr10:66732462_66738274_+	2	0	0	2	2	0	5	0	0	2	2	4
circRNA_1469|Chr10:66732462_66756286_+	0	0	0	0	3	0	0	2	0	0	0	0
circRNA_1470|Chr10:66779889_66822005_+	0	0	0	0	0	0	0	0	2	0	0	0
circRNA_1471|Chr10:66802583_66817057_+	0	0	0	0	0	0	0	0	0	3	0	0
circRNA_1472|Chr10:66802583_66822005_+	0	0	0	0	2	0	0	0	0	0	0	0
circRNA_1473|Chr10:66806816_66817057_+	3	0	3	0	0	2	0	2	0	2	0	4
circRNA_1474|Chr10:66806816_66822005_+	3	0	0	3	2	3	0	3	2	3	2	3
circRNA_1475|Chr10:66812207_66822005_+	2	0	0	0	2	0	0	0	0	0	0	0
circRNA_1476|Chr10:66891013_66900528_+	2	4	2	4	3	4	4	2	2	3	2	4
circRNA_1477|Chr10:66897863_66898928_+	5	4	5	0	11	5	5	7	7	12	7	7
circRNA_1478|Chr10:66897863_66900528_+	0	0	0	0	0	0	0	0	0	2	0	0
circRNA_1479|Chr10:66901944_66917125_+	0	2	0	0	0	0	0	0	0	2	0	0
circRNA_1480|Chr10:67183273_67194370_-	2	0	0	0	0	0	0	0	0	0	0	0
circRNA_1481|Chr10:67212019_67213185_-	3	0	0	0	0	0	0	0	0	0	0	0
circRNA_1482|Chr10:67269441_67273108_-	0	0	0	0	0	0	0	0	0	2	0	0
circRNA_1483|Chr10:67273031_67284275_-	0	0	0	0	0	0	0	0	2	0	0	0
circRNA_1484|Chr10:67363508_67364610_+	0	0	4	0	2	3	0	0	2	0	0	0
circRNA_1485|Chr10:67497682_67503048_+	0	0	0	0	0	0	0	0	0	3	0	0
circRNA_1486|Chr10:67536054_67549049_+	0	0	0	0	0	2	0	0	0	0	0	0
circRNA_1487|Chr10:67579952_67587851_+	0	0	5	2	0	4	3	3	7	6	5	7
circRNA_1488|Chr10:67579952_67594751_+	0	0	0	0	0	0	0	0	3	0	0	0
circRNA_1489|Chr10:67585955_67587851_+	2	4	0	0	0	0	3	2	0	0	0	0
circRNA_1490|Chr10:67695779_67706482_+	0	0	3	0	0	0	0	0	0	0	0	0
circRNA_1491|Chr10:67695779_67711884_+	0	0	2	0	0	2	0	4	0	0	0	2
circRNA_1492|Chr10:67705142_67711884_+	0	2	0	3	0	2	0	0	0	3	0	0
circRNA_1493|Chr10:67741790_67742140_-	0	2	0	2	0	0	0	0	0	0	0	0
circRNA_1494|Chr10:67821172_67828877_+	0	0	3	5	0	4	5	0	2	2	4	0
circRNA_1495|Chr10:67828230_67846913_+	0	0	3	0	0	2	2	2	0	0	2	3
circRNA_1496|Chr10:67842214_67846913_+	0	0	2	0	0	0	0	0	0	0	0	0
circRNA_1497|Chr10:67936673_67982051_-	3	0	2	0	3	3	5	2	0	0	4	3
circRNA_1498|Chr10:67936673_67996702_-	0	0	0	0	0	2	0	0	0	0	0	0
circRNA_1499|Chr10:67965487_67982051_-	18	19	24	12	20	30	35	19	18	21	33	26
circRNA_1500|Chr10:67965487_67996702_-	0	0	0	0	0	0	2	3	0	0	0	0
circRNA_1501|Chr10:67973997_67982051_-	3	0	0	0	0	0	3	0	0	0	0	0
circRNA_1502|Chr10:68016920_68045200_-	0	0	0	0	0	0	0	0	0	0	2	0
circRNA_1503|Chr10:68055285_68061464_-	0	0	0	0	0	0	0	0	0	4	0	0
circRNA_1504|Chr10:68142723_68142865_+	0	0	0	0	0	0	0	0	0	0	0	2
circRNA_1505|Chr10:70069503_70092178_-	0	0	0	0	0	3	0	0	0	0	0	0
circRNA_1506|Chr10:70228852_70234592_-	0	0	0	0	0	0	0	0	0	0	0	2
circRNA_1507|Chr10:70579708_70584317_+	0	2	0	0	0	0	0	0	2	0	4	3
circRNA_1508|Chr10:70580540_70584317_+	0	0	0	2	0	0	0	0	0	0	0	0
circRNA_1509|Chr10:71292795_71298197_+	2	0	0	0	0	0	0	0	0	0	0	0
circRNA_1510|Chr10:71297308_71306105_+	0	0	0	0	4	2	0	2	7	2	0	4
circRNA_1511|Chr10:71302800_71338855_+	0	0	0	0	2	0	0	0	0	0	0	0
circRNA_1512|Chr10:71303915_71311129_+	3	0	2	3	4	4	0	0	0	8	3	3
circRNA_1513|Chr10:71322147_71323079_+	6	0	2	3	8	0	3	2	6	0	0	2
circRNA_1514|Chr10:71399723_71408228_-	0	0	0	3	0	0	0	0	0	0	0	0
circRNA_1515|Chr10:71405117_71408228_-	0	0	0	0	2	0	0	0	0	0	0	0
circRNA_1516|Chr10:71417609_71423705_-	0	0	0	0	0	0	0	0	0	0	0	2
circRNA_1517|Chr10:71499685_71501750_+	0	0	0	0	2	0	0	0	0	0	0	0
circRNA_1518|Chr10:71515700_71519615_+	77	8	58	12	42	6	26	75	32	57	13	30
circRNA_1519|Chr10:71515700_71534951_+	0	0	0	0	0	0	2	0	0	0	0	0
circRNA_1520|Chr10:71515700_71536674_+	0	0	0	0	0	0	0	0	0	4	0	0
circRNA_1521|Chr10:71519366_71606595_+	0	0	0	0	0	0	0	2	0	0	0	0
circRNA_1522|Chr10:71546978_71557193_+	2037	210	1553	116	894	122	711	898	1031	876	238	633
circRNA_1523|Chr10:71575716_71583367_+	3	0	0	0	2	0	0	0	0	0	0	0
circRNA_1524|Chr10:71582732_71590467_+	2	0	0	0	0	0	0	2	0	0	0	0
circRNA_1525|Chr10:71616515_71663880_+	0	0	0	0	0	0	2	0	0	0	0	0
circRNA_1526|Chr10:71619063_71668573_+	5	0	0	0	0	0	0	4	3	2	0	0
circRNA_1527|Chr10:71633026_71638719_+	0	0	2	0	0	0	0	0	0	0	0	0
circRNA_1528|Chr10:71661091_71668573_+	2	0	2	0	0	0	0	0	0	0	0	0
circRNA_1529|Chr10:71684888_71693808_+	9	0	5	0	2	0	0	7	4	2	2	0
circRNA_1530|Chr10:71684888_71702779_+	4	0	4	0	2	0	0	0	0	2	0	0
circRNA_1531|Chr10:71770016_71775089_-	0	0	0	0	0	2	0	0	2	0	0	0
circRNA_1532|Chr10:72147777_72148017_+	0	5	3	0	0	4	4	12	8	13	8	13
circRNA_1533|Chr10:72171107_72179123_-	2	0	0	0	0	0	3	2	0	2	3	0
circRNA_1534|Chr10:72175213_72177858_-	0	0	0	0	0	0	0	2	0	0	0	0
circRNA_1535|Chr10:72319128_72324107_-	0	0	0	0	0	3	0	0	0	0	0	0
circRNA_1536|Chr10:72319128_72332113_-	0	0	0	0	0	0	0	2	0	0	0	0
circRNA_1537|Chr10:72329605_72332113_-	3	0	2	2	0	0	2	0	0	2	0	0
circRNA_1538|Chr10:72329605_72336388_-	0	0	0	0	0	0	0	2	0	0	0	0
circRNA_1539|Chr10:72339727_72342327_-	0	0	2	0	0	0	0	0	0	0	0	0
circRNA_1540|Chr10:72359922_72363205_-	0	0	2	0	0	0	0	0	0	0	0	0
circRNA_1541|Chr10:72359922_72371397_-	0	0	2	0	0	0	3	0	3	4	0	0
circRNA_1542|Chr10:72365735_72371397_-	0	0	0	2	0	0	0	0	0	0	0	0
circRNA_1543|Chr10:72365735_72371838_-	0	0	0	0	0	3	0	0	0	0	0	0
circRNA_1544|Chr10:72369079_72371838_-	11	8	14	17	9	18	20	17	28	15	21	13
circRNA_1545|Chr10:72374202_72380358_-	0	0	2	0	0	0	0	0	0	0	0	0
circRNA_1546|Chr10:72374202_72393462_-	2	0	0	0	0	0	0	0	0	0	0	0
circRNA_1547|Chr10:72389570_72397062_-	0	0	2	2	0	7	0	2	0	4	0	3
circRNA_1548|Chr10:72389570_72417059_-	0	0	0	0	2	0	0	0	3	3	2	5
circRNA_1549|Chr10:72852742_72857948_+	2	2	0	0	2	0	3	0	2	0	0	0
circRNA_1550|Chr10:72924683_72931437_+	0	0	0	0	0	0	0	0	0	2	0	0
circRNA_1551|Chr10:72924683_72938843_+	6	2	0	0	0	3	0	0	0	9	4	0
circRNA_1552|Chr10:73031629_73038307_+	0	0	0	0	0	4	0	0	0	0	0	0
circRNA_1553|Chr10:73648286_73657751_-	0	0	2	0	0	0	0	0	0	0	0	0
circRNA_1554|Chr10:73700951_73702191_-	0	0	0	0	0	0	0	0	2	0	0	0
circRNA_1555|Chr10:73705449_73708421_-	0	0	0	0	0	0	0	0	0	0	0	3
circRNA_1556|Chr10:73705449_73709964_-	0	0	0	4	0	0	0	0	0	0	0	0
circRNA_1557|Chr10:73731366_73736154_-	0	0	0	3	0	0	0	0	0	0	0	0
circRNA_1558|Chr10:73739666_73761718_-	0	0	0	0	0	4	0	0	0	0	0	0
circRNA_1559|Chr10:73751962_73764510_-	0	0	2	0	0	0	0	0	0	0	2	2
circRNA_1560|Chr10:73759988_73764510_-	0	0	0	2	0	2	0	0	0	0	0	0
circRNA_1561|Chr10:73759988_73778454_-	0	0	0	3	0	0	0	0	0	2	0	0
circRNA_1562|Chr10:73814129_73818057_+	2	0	0	0	0	0	0	0	0	0	0	0
circRNA_1563|Chr10:73854212_73857079_-	0	0	3	0	2	2	0	0	0	2	0	0
circRNA_1564|Chr10:74044586_74048655_-	0	0	0	0	0	0	9	0	0	0	0	0
circRNA_1565|Chr10:74044586_74051474_-	0	0	0	0	0	3	0	0	0	0	0	0
circRNA_1566|Chr10:74338952_74360926_-	0	0	0	2	0	0	0	0	0	0	0	0
circRNA_1567|Chr10:74343130_74346973_-	2	0	0	0	0	0	0	0	0	0	0	0
circRNA_1568|Chr10:74467237_74480363_+	0	0	0	0	0	0	0	0	2	0	0	0
circRNA_1569|Chr10:74471246_74480363_+	0	0	0	0	0	0	2	0	0	0	0	0
circRNA_1570|Chr10:74471246_74490078_+	0	0	0	0	0	0	0	0	0	2	0	0
circRNA_1571|Chr10:74474100_74490078_+	0	0	0	2	0	0	0	0	0	2	0	0
circRNA_1572|Chr10:74892407_74894828_+	2	0	0	3	2	0	0	5	2	2	0	0
circRNA_1573|Chr10:75337353_75338713_+	0	0	0	0	0	3	0	0	0	0	0	0
circRNA_1574|Chr10:75337353_75340473_+	0	0	2	6	0	7	5	7	7	0	9	4
circRNA_1575|Chr10:75495818_75496428_+	0	0	3	0	0	0	0	0	2	3	0	0
circRNA_1576|Chr10:76253114_76254031_-	0	0	0	0	0	0	0	0	0	0	0	2
circRNA_1577|Chr10:76253114_76256546_-	0	0	0	2	0	3	0	0	0	0	0	0
circRNA_1578|Chr10:76253114_76261188_-	0	0	0	0	3	0	0	0	0	0	0	0
circRNA_1579|Chr10:76253876_76261188_-	0	0	0	2	0	0	0	0	0	0	0	0
circRNA_1580|Chr10:76387276_76387791_-	0	0	0	0	0	3	0	0	0	0	0	0
circRNA_1581|Chr10:77765225_77772738_+	13	10	13	17	16	20	35	16	15	5	23	26
circRNA_1582|Chr10:77769631_77772738_+	4	3	6	6	4	0	5	2	0	5	0	8
circRNA_1583|Chr10:77782547_77782710_-	0	0	0	0	0	0	0	0	2	0	0	0
circRNA_1584|Chr10:78063351_78073611_-	0	0	2	2	2	0	2	0	2	0	0	0
circRNA_1585|Chr10:78117809_78126033_-	2	0	3	6	2	0	0	4	5	9	0	0
circRNA_1586|Chr10:81577907_81584475_-	0	0	0	0	0	0	0	0	0	2	0	0
circRNA_1587|Chr10:81605735_81610405_+	0	2	0	0	0	0	0	0	0	0	2	0
circRNA_1588|Chr10:81605735_81612625_+	0	0	0	3	2	0	0	3	4	0	0	0
circRNA_1589|Chr10:81605739_81612625_+	2	0	0	0	0	0	0	0	0	0	0	0
circRNA_1590|Chr10:81714613_81755839_+	0	0	2	0	0	0	0	0	0	0	0	0
circRNA_1591|Chr10:81736165_81755839_+	4	0	0	0	0	0	0	2	0	0	0	2
circRNA_1592|Chr10:81751031_81775857_+	0	0	0	0	0	2	0	0	0	0	2	0
circRNA_1593|Chr10:81772366_81773444_+	3	0	0	0	0	0	0	0	0	0	0	0
circRNA_1594|Chr10:81792234_81793662_+	0	0	0	0	0	0	3	0	0	0	0	0
circRNA_1595|Chr10:81798931_81799587_+	0	4	2	5	0	6	8	3	4	3	2	3
circRNA_1596|Chr10:81813534_81816032_-	0	0	0	2	0	0	0	0	0	0	0	0
circRNA_1597|Chr10:82038227_82039192_+	0	0	0	0	0	0	2	0	0	0	0	0
circRNA_1598|Chr10:82753666_82754365_+	0	2	0	2	0	0	0	0	0	0	0	0
circRNA_1599|Chr10:82754319_82754698_-	0	0	0	2	0	0	0	0	0	0	0	0
circRNA_1600|Chr10:82756930_82757314_-	0	0	0	0	0	2	0	0	0	0	0	0
circRNA_1601|Chr10:82760353_82760969_-	0	0	0	2	0	0	0	0	0	0	0	0
circRNA_1602|Chr10:82761490_82761656_-	0	0	0	2	0	0	0	0	0	0	0	0
circRNA_1603|Chr10:82761507_82761656_-	0	0	0	0	0	0	2	0	0	0	0	0
circRNA_1604|Chr10:83101669_83114195_-	0	0	0	0	0	0	0	0	0	2	0	2
circRNA_1605|Chr10:83601126_83611053_-	0	0	0	0	0	0	3	0	0	0	0	0
circRNA_1606|Chr10:85109546_85112742_-	0	0	2	0	0	0	0	0	0	0	0	0
circRNA_1607|Chr10:85164768_85171060_-	6	0	4	6	0	4	4	5	0	2	4	5
circRNA_1608|Chr10:85164768_85171112_-	0	0	0	0	2	0	0	0	0	0	0	0
circRNA_1609|Chr10:85164768_85172858_-	0	0	0	0	0	0	4	0	3	3	3	0
circRNA_1610|Chr10:85164768_85178467_-	0	0	0	0	0	5	0	0	0	0	0	0
circRNA_1611|Chr10:85169572_85172858_-	5	3	4	8	5	11	10	14	11	16	12	7
circRNA_1612|Chr10:85170956_85172858_-	0	0	0	2	0	0	0	0	0	0	0	0
circRNA_1613|Chr10:85176475_85178467_-	0	0	0	0	0	2	0	0	0	0	0	0
circRNA_1614|Chr10:85313576_85314836_+	0	5	3	7	3	0	3	4	2	5	5	8
circRNA_1615|Chr10:85329708_85330427_+	0	0	0	0	2	0	0	0	0	0	0	0
circRNA_1616|Chr10:85405523_85416831_+	0	0	0	0	0	0	0	0	0	2	0	0
circRNA_1617|Chr10:85664537_85672493_-	3	0	0	0	4	0	4	2	4	0	0	0
circRNA_1618|Chr10:86045942_86055293_-	0	0	0	2	2	0	0	0	0	0	0	0
circRNA_1619|Chr10:86051344_86064208_-	0	0	0	0	0	0	0	0	0	0	2	0
circRNA_1620|Chr10:86175962_86180040_+	2	0	0	0	3	0	0	0	0	0	0	2
circRNA_1621|Chr10:86175962_86184480_+	0	0	0	0	2	0	0	3	0	0	0	0
circRNA_1622|Chr10:86175962_86195240_+	8	3	10	9	11	10	13	8	9	4	8	8
circRNA_1623|Chr10:86199507_86200782_+	0	3	0	0	0	2	0	3	0	0	0	0
circRNA_1624|Chr10:86222510_86227000_+	0	0	0	0	2	0	4	0	4	0	0	0
circRNA_1625|Chr10:86222510_86227004_+	18	12	12	9	12	24	20	14	17	23	7	13
circRNA_1626|Chr10:86222510_86235225_+	2	0	0	0	3	0	2	0	0	0	0	0
circRNA_1627|Chr10:86608166_86609094_+	0	0	0	0	0	0	0	0	0	0	0	2
circRNA_1628|Chr10:86717632_86720411_+	0	0	0	0	0	0	3	0	0	0	0	2
circRNA_1629|Chr10:86718140_86720411_+	0	0	0	0	0	0	0	0	0	2	0	0
circRNA_1630|Chr10:86876147_86877951_+	0	0	0	0	0	0	2	0	0	0	0	0
circRNA_1631|Chr10:86961703_86961889_-	0	0	0	0	0	0	0	0	0	0	2	0
circRNA_1632|Chr10:88229170_88229713_+	0	0	0	0	0	0	0	0	0	0	2	0
circRNA_1633|Chr10:88392540_88392735_-	0	0	0	0	0	0	2	0	0	0	0	0
circRNA_1634|Chr10:88397108_88397582_-	8	4	10	4	11	3	7	16	7	7	10	6
circRNA_1635|Chr10:88406660_88413611_-	0	0	2	0	0	0	0	0	0	0	0	0
circRNA_1636|Chr10:88406660_88419957_-	2	0	2	0	0	0	2	0	0	0	0	0
circRNA_1637|Chr10:88410710_88419957_-	0	0	0	0	0	0	0	5	2	0	0	0
circRNA_1638|Chr10:88413044_88413611_-	3	0	0	0	0	0	0	3	0	0	0	0
circRNA_1639|Chr10:88413044_88419957_-	0	0	0	0	0	0	0	3	0	0	0	0
circRNA_1640|Chr10:88419161_88419957_-	2	0	0	0	0	0	0	0	0	0	0	0
circRNA_1641|Chr10:88429541_88435248_-	0	0	0	0	0	0	2	0	0	0	0	0
circRNA_1642|Chr10:88437074_88438345_+	0	0	0	0	2	0	0	0	0	0	0	2
circRNA_1643|Chr10:88476130_88481446_+	2	0	0	0	0	0	0	0	0	0	0	0
circRNA_1644|Chr10:88505059_88507332_-	0	0	0	0	0	0	0	0	2	0	0	0
circRNA_1645|Chr10:88691778_88697079_-	0	2	0	0	0	0	0	2	0	0	0	2
circRNA_1646|Chr10:88704115_88712311_-	0	0	0	0	0	2	0	0	0	0	0	0
circRNA_1647|Chr10:88807421_88815808_-	0	0	0	0	0	0	0	0	0	0	2	0
circRNA_1648|Chr10:88930821_88952777_+	0	0	0	0	0	2	0	0	0	0	0	0
circRNA_1649|Chr10:88933665_88960323_+	0	0	0	0	0	0	0	3	0	0	0	0
circRNA_1650|Chr10:88959731_88960323_+	3	3	0	0	4	2	3	0	0	6	3	0
circRNA_1651|Chr10:89033602_89070231_+	0	0	0	0	2	0	0	0	0	0	0	0
circRNA_1652|Chr10:89120856_89123336_-	0	0	0	0	0	0	2	0	0	0	0	0
circRNA_1653|Chr10:89120856_89130338_-	0	0	0	0	0	0	0	2	0	0	0	0
circRNA_1654|Chr10:89402919_89409533_-	2	0	0	0	0	0	2	0	2	2	2	0
circRNA_1655|Chr10:89653117_89657127_+	0	0	0	0	0	0	3	0	0	0	0	0
circRNA_1656|Chr10:89653117_89659270_+	0	0	0	0	0	2	0	0	0	0	0	0
circRNA_1657|Chr10:89667527_89671438_+	0	0	0	0	0	0	3	0	0	0	0	0
circRNA_1658|Chr10:90433263_90444110_-	5	2	2	3	0	2	6	2	3	2	0	0
circRNA_1659|Chr10:90443967_90454708_-	0	0	0	0	0	2	0	0	0	0	0	0
circRNA_1660|Chr10:90749189_90749801_-	0	0	0	0	4	2	4	2	2	0	3	3
circRNA_1661|Chr10:90781635_90784357_-	0	0	0	0	0	0	0	0	3	0	0	0
circRNA_1662|Chr10:90949093_90975559_-	0	0	0	0	0	0	0	2	0	0	0	0
circRNA_1663|Chr10:90953965_90957691_-	0	0	0	2	0	0	0	0	0	0	2	3
circRNA_1664|Chr10:91140959_91159440_+	3	0	0	0	4	3	0	0	4	2	0	0
circRNA_1665|Chr10:91144151_91149247_+	0	0	0	0	0	0	0	0	2	0	0	0
circRNA_1666|Chr10:91965974_91969538_-	2	0	0	0	0	0	0	4	0	0	0	0
circRNA_1667|Chr10:91965974_91973005_-	0	0	0	0	4	2	2	0	0	3	4	2
circRNA_1668|Chr10:92406311_92432295_-	3	0	3	2	0	2	3	6	0	5	0	2
circRNA_1669|Chr10:92406311_92476192_-	0	0	0	0	0	0	0	2	0	0	3	0
circRNA_1670|Chr10:92424212_92432295_-	0	0	0	0	3	0	2	0	4	4	2	0
circRNA_1671|Chr10:92424212_92476192_-	3	0	4	0	0	0	2	0	0	0	0	0
circRNA_1672|Chr10:92432154_92476192_-	0	3	0	0	0	0	0	0	0	0	0	0
circRNA_1673|Chr10:92474821_92476192_-	36	35	25	39	38	32	27	36	22	35	32	39
circRNA_1674|Chr10:92568655_92570844_-	0	0	2	0	0	0	0	0	0	0	0	0
circRNA_1675|Chr10:92575022_92577776_-	0	0	0	0	0	0	0	3	0	0	0	0
circRNA_1676|Chr10:92575022_92578520_-	0	0	0	0	0	0	3	2	0	3	2	0
circRNA_1677|Chr10:92783795_92783947_+	0	2	0	0	0	0	0	0	0	0	0	0
circRNA_1678|Chr10:93438715_93441515_+	0	0	2	0	2	0	4	2	0	0	2	0
circRNA_1679|Chr10:93438715_93451644_+	2	0	2	0	0	0	0	0	5	0	0	0
circRNA_1680|Chr10:93439729_93471445_+	0	0	0	5	0	2	2	0	2	0	0	0
circRNA_1681|Chr10:93451477_93465700_+	0	0	0	3	0	0	2	0	0	2	0	0
circRNA_1682|Chr10:93451477_93471445_+	2	0	0	0	4	4	3	0	5	0	0	0
circRNA_1683|Chr10:93451477_93483645_+	0	2	0	0	0	4	2	0	3	4	0	0
circRNA_1684|Chr10:93451477_93496245_+	0	0	0	0	0	0	2	0	0	0	0	0
circRNA_1685|Chr10:93464374_93465700_+	0	0	0	0	0	0	0	0	0	5	0	0
circRNA_1686|Chr10:93464374_93483645_+	0	0	0	3	0	0	0	0	2	2	3	3
circRNA_1687|Chr10:94029244_94094189_+	0	0	0	0	0	0	0	0	0	3	0	0
circRNA_1688|Chr10:94292693_94314584_+	4	4	3	4	4	2	5	5	7	4	9	3
circRNA_1689|Chr10:94292693_94320863_+	0	0	0	0	0	0	0	4	0	0	0	2
circRNA_1690|Chr10:94307816_94320863_+	5	0	5	9	0	10	4	5	5	3	0	0
circRNA_1691|Chr10:94311573_94320863_+	0	2	0	3	2	0	0	0	0	0	0	0
circRNA_1692|Chr10:94421381_94426186_+	0	0	0	0	0	2	0	0	0	0	0	2
circRNA_1693|Chr10:94427417_94432093_+	0	0	0	0	0	0	0	0	0	2	0	0
circRNA_1694|Chr10:94615617_94617077_-	5	0	4	7	0	10	4	9	4	6	8	11
circRNA_1695|Chr10:94723925_94741510_-	0	2	0	0	0	0	0	0	0	0	0	0
circRNA_1696|Chr10:94758719_94760369_-	0	2	0	0	0	0	0	0	0	0	0	0
circRNA_1697|Chr10:94876336_94880891_-	0	0	0	0	0	0	0	0	2	0	0	0
circRNA_1698|Chr10:95029081_95044344_-	0	0	2	0	0	0	0	0	0	0	0	0
circRNA_1699|Chr10:95049108_95070099_-	0	0	0	0	0	2	0	0	0	0	0	0
circRNA_1700|Chr10:95049108_95074409_-	0	0	0	0	0	0	2	0	0	0	0	0
circRNA_1701|Chr10:95054759_95074409_-	0	2	0	0	0	0	0	0	0	0	0	0
circRNA_1702|Chr10:95062921_95074409_-	0	0	0	0	0	0	0	0	2	3	2	0
circRNA_1703|Chr10:95065383_95074409_-	3	2	0	2	0	0	0	0	0	0	7	0
circRNA_1704|Chr10:95265354_95268582_-	0	0	0	0	0	0	0	2	0	0	0	0
circRNA_1705|Chr10:95288570_95299099_-	0	0	0	3	0	0	0	2	0	0	3	0
circRNA_1706|Chr10:95293891_95299099_-	3	0	0	0	3	0	2	0	3	0	0	2
circRNA_1707|Chr10:95311195_95315537_-	0	0	0	0	2	0	0	0	0	0	3	0
circRNA_1708|Chr10:95327724_95328546_-	3	0	2	0	0	2	5	0	0	0	0	0
circRNA_1709|Chr10:95395648_95398265_-	0	0	0	0	0	0	2	0	0	0	0	0
circRNA_1710|Chr10:95396660_95398698_-	0	0	0	0	0	0	0	0	2	0	0	0
circRNA_1711|Chr10:95398180_95398698_-	0	0	0	0	0	0	0	0	0	2	0	0
circRNA_1712|Chr10:95621301_95622062_-	0	0	0	0	2	0	0	0	0	0	0	0
circRNA_1713|Chr10:95814871_95824793_+	0	0	0	0	0	0	0	0	0	0	2	0
circRNA_1714|Chr10:95817002_95822801_+	0	2	0	0	0	0	0	0	0	0	0	0
circRNA_1715|Chr10:95841063_95842303_+	0	0	2	0	0	0	0	0	0	0	2	3
circRNA_1716|Chr10:95853352_95869889_+	0	0	0	0	0	0	0	0	0	2	0	0
circRNA_1717|Chr10:95890189_95893306_+	0	0	0	0	0	2	0	0	0	0	0	0
circRNA_1718|Chr10:96264760_96266403_-	0	0	0	4	3	0	4	0	3	2	6	3
circRNA_1719|Chr10:96672236_96679543_+	10	6	17	12	6	24	9	15	12	20	12	19
circRNA_1720|Chr10:96672236_96722491_+	4	2	0	0	0	3	0	2	0	4	0	0
circRNA_1721|Chr10:96759545_96793149_+	0	0	0	0	0	0	0	3	0	0	0	0
circRNA_1722|Chr10:96759545_96821139_+	0	0	0	0	3	0	0	0	0	0	0	0
circRNA_1723|Chr10:96871609_96872153_+	0	0	0	0	0	0	0	2	0	0	0	2
circRNA_1724|Chr10:97771263_97774086_+	0	0	0	0	0	2	0	0	0	0	3	0
circRNA_1725|Chr10:97800114_97827316_+	2	0	0	0	0	0	0	0	0	0	0	0
circRNA_1726|Chr10:97800114_97837432_+	0	0	0	0	0	0	0	0	0	0	0	2
circRNA_1727|Chr10:98242539_98248760_-	0	0	0	2	0	0	0	0	0	0	0	0
circRNA_1728|Chr10:98339552_98360556_-	2	0	0	0	2	0	0	0	0	0	0	0
circRNA_1729|Chr10:102045162_102079765_-	0	0	0	0	0	0	2	0	0	0	0	0
circRNA_1730|Chr10:102393497_102405622_-	0	0	0	3	0	0	0	0	0	0	0	0
circRNA_1731|Chr10:103408040_103409119_+	0	0	0	0	0	0	0	2	0	0	2	0
circRNA_1732|Chr10:104125297_104131309_+	0	0	0	0	0	0	0	0	0	2	0	0
circRNA_1733|Chr10:104335898_104338081_+	0	0	0	0	0	0	0	0	3	0	0	0
circRNA_1734|Chr10:104559912_104560095_-	0	0	0	0	0	0	0	0	0	0	2	0
circRNA_1735|Chr10:104935806_104999940_+	0	0	0	0	0	5	0	0	0	0	0	0
circRNA_1736|Chr10:104956981_104999940_+	0	11	3	3	0	9	6	2	3	5	3	4
circRNA_1737|Chr10:104980533_104999940_+	3	0	0	0	3	0	2	0	0	0	0	0
circRNA_1738|Chr10:105438514_105449755_-	0	0	0	0	0	0	2	0	0	0	0	0
circRNA_1739|Chr10:105783222_105785585_-	0	0	0	0	0	3	0	0	0	0	0	0
circRNA_1740|Chr10:106264856_106265494_+	7	4	2	3	2	0	0	5	0	2	0	2
circRNA_1741|Chr10:106292258_106292400_-	0	0	0	0	0	0	0	0	0	2	0	0
circRNA_1742|Chr10:106662761_106699402_+	0	0	0	0	0	0	2	0	2	4	3	0
circRNA_1743|Chr10:106673704_106674297_+	0	0	0	0	2	0	2	3	0	2	5	2
circRNA_1744|Chr10:106673704_106699402_+	4	7	3	8	6	11	9	10	7	12	6	2
circRNA_1745|Chr10:106712126_106730611_+	0	0	0	0	0	2	0	0	0	3	0	0
circRNA_1746|Chr10:108486117_108494849_+	0	0	0	0	20	0	0	0	16	0	0	0
circRNA_1747|Chr10:108562283_108572283_+	0	0	0	0	0	4	0	0	0	0	0	0
circRNA_1748|Chr10:108584542_108586373_+	0	0	3	0	0	0	0	0	0	0	0	0
circRNA_1749|Chr10:108971032_108982577_+	0	2	0	0	0	0	0	0	0	0	0	0
circRNA_1750|Chr10:109055498_109056103_+	0	0	0	2	0	2	0	0	2	0	0	2
circRNA_1751|Chr10:109310593_109314436_-	0	0	0	0	0	3	0	0	0	0	0	0
circRNA_1752|Chr10:109574583_109588126_-	0	0	2	0	0	0	0	0	3	0	0	0
circRNA_1753|Chr10:109585578_109588876_-	0	0	0	0	3	0	0	0	0	0	0	0
circRNA_1754|Chr10:109754643_109755050_+	0	0	0	0	0	0	0	2	0	0	0	0
circRNA_1755|Chr10:109754865_109755050_+	0	3	0	4	0	2	0	0	0	3	0	3
circRNA_1756|Chr10:109754888_109755050_+	3	0	0	0	3	4	5	0	6	11	3	3
circRNA_1757|Chr10:109754906_109755050_+	6	6	9	8	14	16	11	8	12	21	11	15
circRNA_1758|Chr10:109988306_109988575_+	0	0	2	0	0	0	0	0	0	0	0	0
circRNA_1759|Chr10:109991248_109991493_-	0	0	2	0	0	0	0	0	0	0	0	0
circRNA_1760|Chr10:109992564_109992911_-	3	0	0	0	0	0	2	0	0	0	0	0
circRNA_1761|Chr10:109993538_109993971_+	6	0	2	0	0	0	2	0	0	0	0	0
circRNA_1762|Chr10:109994919_110000685_+	0	0	0	0	0	0	3	0	0	0	0	0
circRNA_1763|Chr10:109997745_109998061_+	0	0	3	0	0	0	0	0	0	0	0	0
circRNA_1764|Chr10:110000657_110000857_+	0	0	0	0	13	0	0	9	12	11	0	5
circRNA_1765|Chr10:110000686_110000857_+	0	0	2	0	0	0	0	0	2	0	0	0
circRNA_1766|Chr10:110043769_110090416_-	0	2	3	0	0	2	2	3	0	3	0	5
circRNA_1767|Chr10:110099775_110101880_-	0	0	0	0	0	0	0	0	2	0	0	0
circRNA_1768|Chr10:110101466_110101880_-	0	9	2	5	6	2	3	2	3	5	2	6
circRNA_1769|Chr10:110157631_110164041_-	2	0	0	0	2	0	0	0	0	0	0	0
circRNA_1770|Chr10:110157724_110164041_-	0	0	0	0	0	0	0	0	0	0	2	0
circRNA_1771|Chr10:110495072_110500097_+	0	0	0	0	3	0	0	0	0	0	5	0
circRNA_1772|Chr10:110495072_110508344_+	0	0	0	0	0	0	0	0	0	2	3	0
circRNA_1773|Chr10:110505762_110508344_+	0	0	0	0	4	3	0	0	0	0	0	2
circRNA_1774|Chr10:110505762_110509297_+	2	2	0	2	0	0	0	0	0	0	5	0
circRNA_1775|Chr10:110533622_110539223_-	0	0	0	0	0	0	0	0	0	0	0	2
circRNA_1776|Chr10:110535457_110536927_-	0	0	0	0	2	0	0	0	0	2	0	2
circRNA_1777|Chr10:110651174_110653361_+	0	0	0	0	2	0	2	2	0	0	2	0
circRNA_1778|Chr10:110651174_110665630_+	0	0	0	0	0	0	0	0	0	2	0	0
circRNA_1779|Chr10:110660436_110690679_+	2	0	3	0	2	3	2	0	0	0	0	0
circRNA_1780|Chr10:110665498_110690679_+	0	2	2	0	0	0	0	2	0	0	0	2
circRNA_1781|Chr10:110680099_110690679_+	9	8	2	9	8	13	7	9	6	9	16	13
circRNA_1782|Chr10:110680099_110701222_+	0	0	0	0	0	0	0	0	0	2	0	0
circRNA_1783|Chr10:110680099_110727788_+	0	0	0	0	2	0	0	0	0	0	0	0
circRNA_1784|Chr10:110680099_110736758_+	0	0	3	3	0	0	0	0	0	0	0	0
circRNA_1785|Chr10:110680099_110743375_+	0	0	0	0	0	0	0	0	0	0	0	2
circRNA_1786|Chr10:110680099_110747489_+	0	0	0	0	0	0	0	0	0	0	0	2
circRNA_1787|Chr10:110757745_110776103_+	0	0	0	0	0	0	0	0	0	0	0	2
circRNA_1788|Chr10:110898615_110905692_+	0	0	0	0	0	0	0	0	4	0	0	0
circRNA_1789|Chr11:3130982_3142832_+	0	0	0	0	0	4	0	0	0	0	0	0
circRNA_1790|Chr11:3142305_3142832_+	0	0	0	0	0	0	0	2	4	0	0	0
circRNA_1791|Chr11:4324302_4397333_-	0	2	0	0	0	0	0	0	0	0	0	0
circRNA_1792|Chr11:7235926_7300336_+	2	0	0	0	0	0	0	0	0	0	0	0
circRNA_1793|Chr11:7279655_7300336_+	6	0	0	0	0	0	3	0	0	2	0	0
circRNA_1794|Chr11:7300221_7362812_+	0	0	0	0	2	3	0	3	0	0	0	0
circRNA_1795|Chr11:7355304_7362812_+	3	5	0	3	0	0	6	5	3	4	4	3
circRNA_1796|Chr11:10020678_10022991_+	0	2	0	2	0	0	0	0	2	4	4	4
circRNA_1797|Chr11:14700873_14721315_-	4	5	6	5	9	5	2	11	13	6	4	5
circRNA_1798|Chr11:14717822_14721315_-	0	0	0	2	0	0	0	0	0	2	0	0
circRNA_1799|Chr11:14717822_14722788_-	0	0	0	0	0	0	0	0	2	0	0	0
circRNA_1800|Chr11:15457479_15461262_+	0	0	0	0	0	2	0	0	0	0	0	0
circRNA_1801|Chr11:15457479_15474826_+	0	0	2	0	4	0	2	5	3	2	3	0
circRNA_1802|Chr11:15472547_15474826_+	0	0	2	0	0	0	2	0	3	0	0	0
circRNA_1803|Chr11:15522824_15529725_+	0	0	0	0	2	0	0	0	0	0	0	0
circRNA_1804|Chr11:16002187_16050498_+	0	0	0	0	0	0	0	0	0	3	0	0
circRNA_1805|Chr11:16048185_16050498_+	0	0	0	0	0	0	0	0	0	0	2	0
circRNA_1806|Chr11:24447169_24498116_-	0	0	0	0	0	0	0	3	0	0	0	0
circRNA_1807|Chr11:24479964_24498116_-	3	0	3	2	5	4	0	2	3	7	3	3
circRNA_1808|Chr11:24479964_24508984_-	0	0	0	0	2	0	0	0	0	0	0	0
circRNA_1809|Chr11:24479964_24512332_-	2	0	0	0	0	0	2	2	0	0	0	0
circRNA_1810|Chr11:24491881_24498116_-	0	0	2	0	0	0	2	4	2	0	0	2
circRNA_1811|Chr11:24527899_24550752_-	2	3	2	0	0	0	0	0	5	3	4	0
circRNA_1812|Chr11:24547990_24550752_-	3	2	12	12	6	5	11	5	9	14	6	5
circRNA_1813|Chr11:25432866_25442758_-	3	0	6	0	6	7	5	4	5	2	7	4
circRNA_1814|Chr11:29967593_29992834_-	0	2	0	0	0	0	0	0	0	0	0	0
circRNA_1815|Chr11:30385457_30395350_-	0	0	0	0	0	0	0	0	0	0	0	2
circRNA_1816|Chr11:30393126_30402401_-	0	0	0	0	0	0	0	0	0	0	2	0
circRNA_1817|Chr11:31134281_31135102_-	0	0	0	0	0	0	0	0	0	2	0	0
circRNA_1818|Chr11:31144839_31152507_-	0	0	0	3	0	0	0	0	2	0	0	0
circRNA_1819|Chr11:31147232_31152507_-	0	0	0	2	0	0	0	0	0	0	0	0
circRNA_1820|Chr11:31657287_31660183_+	0	0	0	0	0	0	0	0	0	2	0	0
circRNA_1821|Chr11:31723564_31730227_-	0	0	0	3	0	0	0	5	0	0	4	0
circRNA_1822|Chr11:31723564_31733245_-	3	4	0	2	2	5	6	8	6	6	7	3
circRNA_1823|Chr11:31723564_31747202_-	0	0	4	0	0	2	4	0	0	0	3	0
circRNA_1824|Chr11:31723564_31747205_-	0	0	0	0	2	0	2	0	0	0	0	0
circRNA_1825|Chr11:31727378_31733245_-	2	0	2	0	2	0	4	0	0	4	2	5
circRNA_1826|Chr11:31784786_31790254_-	0	0	0	0	0	0	0	0	0	0	0	2
circRNA_1827|Chr11:31787922_31788551_-	0	0	0	0	0	0	0	0	0	0	2	0
circRNA_1828|Chr11:31844922_31853246_-	0	0	0	2	0	0	0	0	0	0	0	0
circRNA_1829|Chr11:31943121_31946043_+	0	0	0	0	0	0	2	0	3	0	0	0
circRNA_1830|Chr11:31943121_31955266_+	2	4	3	5	0	6	2	9	5	3	0	3
circRNA_1831|Chr11:31974630_31979720_+	4	0	0	0	2	2	3	0	0	0	0	0
circRNA_1832|Chr11:31974630_31996846_+	0	0	0	2	0	0	0	0	0	0	0	0
circRNA_1833|Chr11:31985976_32001678_+	0	0	0	0	0	2	0	0	0	0	0	0
circRNA_1834|Chr11:32131817_32132488_+	2	0	0	0	0	0	0	0	0	0	0	0
circRNA_1835|Chr11:33819569_33852005_-	0	0	0	0	0	0	0	0	6	0	0	0
circRNA_1836|Chr11:33835827_33852005_-	0	0	0	0	0	0	0	2	0	0	0	0
circRNA_1837|Chr11:33952127_33953096_+	3	0	2	0	3	0	0	0	0	0	4	0
circRNA_1838|Chr11:33964887_33968760_+	0	0	0	0	0	0	0	2	0	0	0	0
circRNA_1839|Chr11:34017712_34018067_+	3	0	2	3	2	0	3	3	2	11	2	0
circRNA_1840|Chr11:34060062_34073206_+	8	3	9	10	8	14	17	11	11	7	9	13
circRNA_1841|Chr11:34064815_34070810_+	0	0	0	2	0	0	0	0	0	0	0	0
circRNA_1842|Chr11:34065892_34070810_+	3	0	6	6	0	7	7	8	12	9	8	9
circRNA_1843|Chr11:34067716_34073206_+	0	0	0	0	0	0	0	2	0	0	0	0
circRNA_1844|Chr11:34367197_34370213_-	0	0	3	3	5	4	5	0	3	3	4	3
circRNA_1845|Chr11:34456795_34462596_-	0	0	2	0	0	0	0	0	0	0	0	0
circRNA_1846|Chr11:34462325_34500943_-	0	0	0	0	0	0	0	0	3	0	2	0
circRNA_1847|Chr11:34495233_34500943_-	12	0	7	8	6	5	9	15	13	11	10	10
circRNA_1848|Chr11:34611539_34614139_+	15	0	4	4	3	6	6	10	32	6	4	12
circRNA_1849|Chr11:34611539_34631134_+	0	0	3	4	0	6	0	4	2	3	4	4
circRNA_1850|Chr11:34612627_34613649_+	0	0	0	2	0	0	0	0	0	0	0	0
circRNA_1851|Chr11:34612627_34614139_+	43	16	24	36	20	39	47	74	93	54	31	46
circRNA_1852|Chr11:34612627_34616155_+	2	0	0	0	0	0	0	5	4	0	0	4
circRNA_1853|Chr11:34612627_34631134_+	21	11	16	26	11	18	28	19	30	23	17	21
circRNA_1854|Chr11:34612627_34639821_+	0	0	0	0	0	0	2	0	0	0	0	0
circRNA_1855|Chr11:34616102_34631134_+	0	0	0	3	0	0	0	0	0	0	0	0
circRNA_1856|Chr11:34631080_34639821_+	0	0	0	0	0	0	3	0	0	0	0	0
circRNA_1857|Chr11:34631080_34653113_+	0	0	2	0	0	0	0	0	0	0	0	0
circRNA_1858|Chr11:34631080_34655346_+	2	0	0	0	0	0	0	0	0	0	0	0
circRNA_1859|Chr11:34631080_34668255_+	2	0	0	0	0	0	0	0	0	0	0	0
circRNA_1860|Chr11:34637281_34655970_+	0	0	0	3	0	5	5	5	3	0	2	2
circRNA_1861|Chr11:34668091_34722272_+	2	0	2	2	0	3	0	0	0	0	0	0
circRNA_1862|Chr11:34861207_34879143_+	20	10	17	27	34	29	28	18	17	24	30	31
circRNA_1863|Chr11:34861207_34899297_+	0	2	0	0	0	0	0	0	0	0	0	0
circRNA_1864|Chr11:34861207_34922336_+	0	0	0	0	0	0	0	3	0	0	2	3
circRNA_1865|Chr11:34865447_34879143_+	0	0	0	0	0	0	0	0	0	0	2	0
circRNA_1866|Chr11:34879058_34885975_+	0	2	0	0	0	0	0	0	0	0	0	0
circRNA_1867|Chr11:34879058_34922336_+	0	6	0	0	0	0	0	0	0	0	0	0
circRNA_1868|Chr11:34879058_34929247_+	0	0	0	0	0	0	0	0	0	0	2	0
circRNA_1869|Chr11:34879058_34940932_+	3	0	0	0	2	0	0	0	0	0	0	0
circRNA_1870|Chr11:34922140_34929247_+	2	0	3	0	0	0	0	0	2	0	0	0
circRNA_1871|Chr11:34922140_34940932_+	0	0	0	0	0	2	0	5	0	0	0	0
circRNA_1872|Chr11:34936459_34949727_+	0	0	0	0	0	3	0	0	0	0	0	0
circRNA_1873|Chr11:35676333_35696807_-	0	0	0	0	0	2	0	0	0	0	0	0
circRNA_1874|Chr11:36330270_36332005_-	0	0	0	4	2	0	6	0	0	2	0	2
circRNA_1875|Chr11:36364778_36369459_-	0	0	0	0	0	0	2	0	0	0	0	0
circRNA_1876|Chr11:36364778_36370424_-	0	0	0	0	0	0	2	0	0	0	0	0
circRNA_1877|Chr11:36376027_36378869_-	0	0	0	0	0	0	0	3	0	0	0	0
circRNA_1878|Chr11:36390972_36412645_-	0	0	0	0	0	0	0	0	0	0	2	0
circRNA_1879|Chr11:36397572_36412645_-	3	0	0	0	0	0	0	0	0	0	0	0
circRNA_1880|Chr11:36400178_36406937_-	0	0	0	0	0	0	3	2	0	0	3	0
circRNA_1881|Chr11:36404909_36414652_-	2	0	0	0	0	0	0	0	0	0	0	0
circRNA_1882|Chr11:37845711_37868020_+	0	0	0	0	0	0	0	0	0	2	0	0
circRNA_1883|Chr11:38308138_38309073_-	0	0	0	0	0	0	2	0	0	0	0	0
circRNA_1884|Chr11:38308138_38310638_-	0	0	0	0	0	2	0	0	0	0	2	0
circRNA_1885|Chr11:38379650_38410172_-	2	0	0	2	2	4	4	2	0	2	4	7
circRNA_1886|Chr11:38379650_38410186_-	0	0	0	0	0	0	0	0	0	0	2	0
circRNA_1887|Chr11:38389391_38410172_-	0	0	0	0	0	0	0	0	0	0	0	2
circRNA_1888|Chr11:38389399_38410172_-	0	0	0	0	0	0	0	0	0	0	0	2
circRNA_1889|Chr11:38410074_38415258_-	0	0	0	0	2	0	0	0	0	0	0	0
circRNA_1890|Chr11:38536167_38545947_+	0	0	0	0	0	0	0	0	0	0	6	5
circRNA_1891|Chr11:42948291_42972833_+	0	0	0	0	0	2	0	0	0	0	0	0
circRNA_1892|Chr11:42955822_42957911_+	0	0	0	0	0	4	0	0	0	0	0	0
circRNA_1893|Chr11:42955822_42963327_+	0	0	0	0	0	2	0	0	3	0	0	3
circRNA_1894|Chr11:42971544_42981312_+	2	0	0	0	0	0	0	0	0	0	0	0
circRNA_1895|Chr11:42978275_42981312_+	3	0	0	2	0	0	0	2	4	0	0	0
circRNA_1896|Chr11:44248790_44260220_-	0	0	0	0	0	0	0	0	0	2	0	0
circRNA_1897|Chr11:45487965_45497839_-	0	0	4	2	0	0	3	0	0	0	0	0
circRNA_1898|Chr11:45492229_45497839_-	0	0	0	2	0	0	0	0	0	2	0	0
circRNA_1899|Chr11:46265845_46267402_-	0	0	0	0	0	0	0	0	2	0	0	0
circRNA_1900|Chr11:46324401_46341113_-	0	0	2	0	0	3	3	2	0	0	0	0
circRNA_1901|Chr11:46896818_46915497_-	0	0	3	0	4	0	0	2	0	4	0	0
circRNA_1902|Chr11:47165426_47169764_+	0	0	0	3	0	3	0	3	3	9	2	0
circRNA_1903|Chr11:51049296_51068978_-	0	0	0	0	0	0	3	0	0	0	0	2
circRNA_1904|Chr11:53140598_53145414_+	0	0	0	2	0	0	0	0	0	0	0	0
circRNA_1905|Chr11:53140598_53154994_+	0	0	0	0	0	0	2	0	0	0	2	0
circRNA_1906|Chr11:53154799_53159042_+	0	0	0	0	0	0	0	0	0	2	0	0
circRNA_1907|Chr11:53511143_53519258_-	4	2	0	0	3	0	2	0	0	0	0	0
circRNA_1908|Chr11:53545477_53563559_-	5	6	5	3	3	0	5	2	4	5	4	4
circRNA_1909|Chr11:54004448_54015270_-	0	0	0	0	0	0	0	0	0	2	0	0
circRNA_1910|Chr11:57430166_57431024_+	0	0	0	0	0	0	3	0	0	0	0	0
circRNA_1911|Chr11:57442466_57454443_+	8	9	13	15	12	4	16	8	6	7	16	10
circRNA_1912|Chr11:57449836_57454443_+	0	0	0	0	0	0	2	0	0	0	0	0
circRNA_1913|Chr11:57449836_57469828_+	0	0	0	0	0	0	0	0	2	0	0	0
circRNA_1914|Chr11:57937853_57965693_-	3	0	0	2	0	0	0	0	0	2	0	0
circRNA_1915|Chr11:57955724_57965693_-	0	0	0	0	2	0	2	0	2	0	0	2
circRNA_1916|Chr11:60383243_60388137_+	0	0	4	3	3	10	3	0	0	0	5	3
circRNA_1917|Chr11:60646798_60656478_-	3	0	0	5	0	7	4	3	0	0	6	0
circRNA_1918|Chr11:60646798_60669264_-	0	0	0	0	0	0	0	0	0	0	0	2
circRNA_1919|Chr11:60677240_60677399_+	0	0	0	0	0	0	0	0	0	0	3	0
circRNA_1920|Chr11:60677262_60677419_+	0	0	0	0	0	0	0	0	0	0	2	0
circRNA_1921|Chr11:60943399_60956337_-	0	2	0	0	0	0	0	0	0	0	0	0
circRNA_1922|Chr11:61121301_61122547_+	4	5	11	14	8	14	4	11	7	14	12	7
circRNA_1923|Chr11:61450400_61475868_-	0	0	0	0	0	0	0	0	2	0	0	0
circRNA_1924|Chr11:61684121_61698595_-	0	0	0	2	0	0	0	0	0	0	0	0
circRNA_1925|Chr11:62059611_62067655_-	0	0	0	2	0	0	0	0	0	0	0	2
circRNA_1926|Chr11:64694488_64697432_+	0	0	0	0	0	0	2	0	0	0	0	0
circRNA_1927|Chr11:64704113_64708610_+	0	0	0	0	0	0	2	0	0	0	0	0
circRNA_1928|Chr11:64733727_64743271_-	0	0	0	0	0	0	0	0	0	0	3	0
circRNA_1929|Chr11:64795077_64799354_+	0	0	0	0	0	0	0	3	0	0	0	2
circRNA_1930|Chr11:64795077_64800821_+	0	0	0	2	0	0	0	0	3	0	0	0
circRNA_1931|Chr11:64795077_64815165_+	3	0	0	0	0	0	0	0	2	0	0	0
circRNA_1932|Chr11:66082755_66083227_+	0	0	0	0	0	0	0	3	0	2	0	2
circRNA_1933|Chr11:66454714_66495638_+	0	0	0	0	0	0	0	0	0	0	0	2
circRNA_1934|Chr11:66799393_66807696_-	2	0	0	0	0	4	0	0	0	2	0	0
circRNA_1935|Chr11:66801332_66807696_-	0	0	0	0	0	0	0	0	0	0	2	0
circRNA_1936|Chr11:66804245_66807696_-	0	0	0	0	2	0	0	0	0	0	0	0
circRNA_1937|Chr11:66862146_66875553_-	0	0	0	0	3	3	0	0	0	0	0	0
circRNA_1938|Chr11:67671071_67673482_-	0	0	2	0	0	0	0	0	0	0	0	0
circRNA_1939|Chr11:67672962_67674360_-	0	0	0	0	0	0	0	2	0	2	0	2
circRNA_1940|Chr11:68235173_68237408_+	0	0	0	2	0	0	0	0	0	0	0	0
circRNA_1941|Chr11:68235173_68251982_+	0	0	0	0	0	0	0	3	0	0	0	2
circRNA_1942|Chr11:68652290_68672983_+	2	0	0	0	2	2	0	4	0	3	3	3
circRNA_1943|Chr11:68652290_68680936_+	0	0	0	0	0	0	0	0	0	2	0	0
circRNA_1944|Chr11:68716748_68730129_-	0	0	0	0	0	0	0	0	2	0	0	0
circRNA_1945|Chr11:68722906_68725314_-	7	8	9	21	16	18	31	21	5	24	19	20
circRNA_1946|Chr11:68722906_68730129_-	6	6	5	8	10	9	10	11	8	8	12	18
circRNA_1947|Chr11:68722906_68750272_-	0	0	0	0	0	3	2	0	0	0	2	0
circRNA_1948|Chr11:68725173_68730129_-	3	0	4	6	4	9	5	8	0	9	4	7
circRNA_1949|Chr11:68745884_68750272_-	0	2	2	0	2	4	6	4	2	4	4	4
circRNA_1950|Chr11:68745884_68803842_-	0	0	0	0	0	0	0	0	0	0	2	0
circRNA_1951|Chr11:68894558_68900825_-	2	2	0	0	0	0	0	3	0	3	2	2
circRNA_1952|Chr11:69014345_69014480_+	0	0	0	0	0	0	2	0	0	0	0	0
circRNA_1953|Chr11:69018396_69064671_-	2	0	0	3	5	2	6	3	0	3	4	4
circRNA_1954|Chr11:69035860_69068514_-	0	0	0	2	0	0	0	0	0	0	0	0
circRNA_1955|Chr11:69045322_69068514_-	2	0	0	0	0	0	0	3	0	0	0	0
circRNA_1956|Chr11:69055768_69068514_-	0	0	0	0	0	0	0	3	0	0	0	0
circRNA_1957|Chr11:69064518_69068514_-	3	5	2	2	3	4	3	0	3	0	7	4
circRNA_1958|Chr11:69636827_69640718_+	0	0	0	3	0	0	2	0	0	0	0	0
circRNA_1959|Chr11:69636827_69666100_+	0	0	0	0	2	0	0	0	0	0	0	0
circRNA_1960|Chr11:69636827_69706118_+	0	0	0	0	0	4	0	0	0	0	0	2
circRNA_1961|Chr11:69685735_69692851_+	0	0	0	0	0	0	0	0	3	0	0	0
circRNA_1962|Chr11:69685735_69706118_+	0	0	0	0	3	0	2	2	0	0	2	0
circRNA_1963|Chr11:69750061_69806777_+	0	2	0	0	0	0	0	0	0	0	0	0
circRNA_1964|Chr11:69762379_69778524_+	0	0	0	0	0	0	0	0	0	2	0	0
circRNA_1965|Chr11:69785001_69837765_+	0	0	0	0	0	0	2	0	0	2	0	0
circRNA_1966|Chr11:69896637_69958405_+	0	0	0	0	2	0	0	0	0	0	0	0
circRNA_1967|Chr11:69930985_69958405_+	0	0	0	2	0	0	0	0	0	0	0	0
circRNA_1968|Chr11:69956881_69958405_+	5	2	0	3	0	4	0	7	3	0	0	0
circRNA_1969|Chr11:70086253_70096544_-	10	8	8	8	11	14	10	7	9	10	12	6
circRNA_1970|Chr11:70086253_70106439_-	0	0	2	0	0	0	0	0	0	0	0	0
circRNA_1971|Chr11:70086253_70156430_-	0	0	0	2	0	0	0	0	0	0	0	0
circRNA_1972|Chr11:70130510_70156430_-	3	0	0	0	0	0	5	2	0	0	2	0
circRNA_1973|Chr11:70140138_70156430_-	0	0	0	0	0	0	0	0	2	2	0	0
circRNA_1974|Chr11:70286566_70288068_-	0	0	0	0	0	0	0	2	0	0	0	0
circRNA_1975|Chr11:70296513_70300006_-	0	0	0	0	0	0	0	0	0	0	0	2
circRNA_1976|Chr11:70539679_70550977_-	0	0	0	0	0	0	0	0	0	3	0	0
circRNA_1977|Chr11:70570466_70585055_-	9	0	0	5	0	6	4	2	0	0	0	6
circRNA_1978|Chr11:70724569_70728535_-	4	0	0	0	4	0	0	4	2	4	3	2
circRNA_1979|Chr11:70724569_70731435_-	2	0	0	0	0	0	0	0	0	0	0	0
circRNA_1980|Chr11:70785758_70799636_-	0	0	0	0	0	0	0	2	0	0	0	0
circRNA_1981|Chr11:70797120_70799636_-	2	0	0	3	2	0	3	3	0	3	0	0
circRNA_1982|Chr11:70797120_70806783_-	0	0	0	0	0	0	0	0	0	2	0	0
circRNA_1983|Chr11:70797120_70820621_-	0	0	2	0	0	0	2	0	0	0	2	0
circRNA_1984|Chr11:70806607_70820621_-	2	0	0	0	0	0	0	0	0	0	0	0
circRNA_1985|Chr11:70810417_70820621_-	2	2	4	4	2	0	0	2	0	0	0	3
circRNA_1986|Chr11:70952862_70956539_-	0	0	0	3	0	0	0	0	0	0	0	0
circRNA_1987|Chr11:71019031_71030730_-	0	0	0	4	0	0	0	0	0	0	0	0
circRNA_1988|Chr11:71019031_71034164_-	0	0	0	0	0	0	0	0	0	0	0	2
circRNA_1989|Chr11:71027471_71035942_-	0	3	0	0	3	2	3	0	2	2	5	0
circRNA_1990|Chr11:71030000_71035942_-	3	5	4	4	4	2	0	3	3	7	3	8
circRNA_1991|Chr11:71035892_71041127_-	0	0	0	0	0	0	0	0	3	0	0	0
circRNA_1992|Chr11:71041051_71059138_-	0	0	0	0	0	0	0	0	0	2	0	0
circRNA_1993|Chr11:71045754_71056850_-	0	0	0	0	0	0	0	0	0	0	2	0
circRNA_1994|Chr11:71056741_71074618_-	2	3	2	5	4	3	9	4	4	0	6	7
circRNA_1995|Chr11:71069746_71074618_-	11	10	11	15	13	15	23	10	20	27	22	18
circRNA_1996|Chr11:71945562_71950336_+	0	0	0	0	0	0	0	0	0	0	0	2
circRNA_1997|Chr11:72200684_72236448_-	0	0	2	0	0	0	0	0	0	0	0	0
circRNA_1998|Chr11:72228954_72236448_-	0	0	0	0	0	3	2	0	0	0	0	2
circRNA_1999|Chr11:72245130_72264219_-	0	0	0	0	2	0	0	0	0	0	0	2
[truncated: 7,631 more rows]

## Sheet: LncRNA counts
lncRNA_id	C-1	C-2	C-3	C-4	C-5	C-6	H-1	H-2	H-3	H-4	H-5	H-6
ENSRNOT00000000560	5.55637	0.243261	0	3.18517	15.3411	9.69097	9.90684	7.89324	8.97403	10.1622	12.753	8.51505
ENSRNOT00000015955	0	0.584758	2.54637	0	0	2.18576	1.29588	1.23205	2.02366	1.22097	0	0.638276
ENSRNOT00000017923	0	0	0	0	0	0	0	0	0	0	0	0
ENSRNOT00000021237	0	0	2.16878	3.01114	1.12256	2.02333	0	2.17099	2.11763	2.12039	3.12193	2.00835
ENSRNOT00000022314	6.86801	30.1566	21.057	26.1702	24.7912	34.245	25.3945	39.6208	25.3817	34.5619	38.4086	35.4535
ENSRNOT00000022622	73.1143	17.9275	46.5454	4.60699	37.0302	11.7238	25.6347	30.4581	53.3613	49.0812	18.3353	37.4418
ENSRNOT00000025795	253.073	309.445	293.423	169.689	249.855	260.065	224.479	219.231	443.785	581.405	275.098	207.183
ENSRNOT00000029245	4.54983	9.81578	5.81025	4.99713	11.3405	16.9676	8.03904	8.87851	16.3206	14.1325	23.1985	15.6112
ENSRNOT00000029433	0	0	0	0	0	0	0	0	0	0	0	0
ENSRNOT00000031815	0	0	0	0	0	0	0	0	0	0	1.08904	0
ENSRNOT00000031927	0	0	0	0	0	0	0	0	0	0	0	0
ENSRNOT00000034303	0	0	0	0	0	0	0	0	0	0	0	0
ENSRNOT00000035829	0	0	0	0	0	0	0	0	1.39833	0	0	0
ENSRNOT00000036416	35.4272	16.8686	7.37013	12.431	18.6084	14.9662	8.55588	13.9945	4.16809	6.03923	12.4821	8.72736
ENSRNOT00000037886	0	0	0	0	0	0	0	0	0	0	0	0
ENSRNOT00000041963	0	0	0	0	0	0	0	0	0	0	0	0
ENSRNOT00000046605	0	0	0	0	0	0	0	0	0	0	0	0
ENSRNOT00000047544	11.4326	4.35869	9.48078	1.00157	2.25293	2.07998	5.41044	7.23074	3.26046	3.86706	3.11528	4.78918
ENSRNOT00000048127	0	0	0	0	0	0	0	0	0	0	0	0
ENSRNOT00000059261	0	0	0	0	0	0	0	0	0	0	0	0
ENSRNOT00000060424	0	0	0	0	0	0	0	0	0	0	0	0
ENSRNOT00000062051	11.1093	4.78635	7.7573	1.91416	3.33514	2.93229	0	11.3098	26.9501	18.5354	0	0.481558
ENSRNOT00000064894	2.2387	0	0	1.4062	0	1.49946	0	0	0	3.01046	0	0
ENSRNOT00000065487	2.40849	0	9.42753	0	1.07726	0	0	0	5.26077	0	1.41837	0
ENSRNOT00000066530	0	0	0	0	0	0	0	0	0	0	0	0
ENSRNOT00000067667	0	0	0	0	0	0	0	0	0	0	0	0
ENSRNOT00000071091	0	0	0	0	0	2.90263	0	0	0	0	0	0
ENSRNOT00000071313	0	0	0	0	0	1.48009	0	0	1.40899	0	0	0
ENSRNOT00000071792	0	0	0	0	0	0	0	0	0	0	0	0
ENSRNOT00000071923	24.9114	0	0	1.2398	2.40235	0	0	6.62037	6.15003	1.03427	0	0
ENSRNOT00000072097	53.8078	18.6329	26.3267	32.1712	30.1297	57.3468	43.884	26.29	36.3567	43.4285	44.0064	53.0633
ENSRNOT00000072935	2.02393	3.54	6.33552	1.90367	3.8981	1.97632	2.76633	0.866926	5.76828	2.78553	2.94091	4.62208
ENSRNOT00000073022	0	0	0	0	0	0	0	0	0	0	0	0
ENSRNOT00000073957	64.9966	0	0	0.00058	0.009334	0	29.2056	0.000654	0	0	1.23436	2e-06
ENSRNOT00000074264	0	0	0	0.218363	0	0	0	0	14.3562	0.000372	7.4e-05	0
ENSRNOT00000074731	1.37962	1.26083	0	0	2.63575	0	0	1.34413	1.28763	0	0	1.13482
ENSRNOT00000075746	0	0	0	0	0	0.813425	0	0	0	0	0	0
ENSRNOT00000075835	0	0	0	0	0	0	0	0	0	0	0	0
ENSRNOT00000075844	0	0	0	0	0	0	0	0	0	0	0	0
ENSRNOT00000075848	3.75043	13.4597	4.94785	6.12347	8.40917	7.70202	9.09754	2.56471	10.0536	7.98112	5.13763	11.8041
ENSRNOT00000075859	0	0	0	0	0	0	0	0	0	0	0	0
ENSRNOT00000075897	134.585	328.699	113.548	137.616	131.217	206.124	164.189	172.211	207.689	203.355	221.089	250.905
ENSRNOT00000075903	0	0	0	0	0	0	0	0	0	0	0	0
ENSRNOT00000075905	5.6156	0	0	0	0	0	0	0	0	0	0	0
ENSRNOT00000075913	0	0	0	0	0	0	0	0	1.34027	3.94201	0	0
ENSRNOT00000075923	0	0	0	0	0	0	0	0	0	0	0	0
ENSRNOT00000075984	0	0	0	0	0	0	0	0	0	0	0	0
ENSRNOT00000076033	0	0	0	0	0	0	0	0	0	0	0	0
ENSRNOT00000076045	825.481	589.865	562.384	347.44	637.294	478.569	553.285	413.787	538.316	482.676	540.309	485.305
ENSRNOT00000076046	0	0	0	0	0	0	0	0	0	0	0	0
ENSRNOT00000076067	10.8198	8.30988	12.0961	11.6067	14.1172	9.92434	16.8873	10.147	10.4494	13.963	12.8179	18.766
ENSRNOT00000076115	1.85657	11.9995	0	0.751309	3.62133	4.734	5.4061	0.746702	33.5694	48.9946	30.4217	6.02799
ENSRNOT00000076116	0.799552	0	0	0	0	0	0	0	0	0	0	0
ENSRNOT00000076120	123.691	52.565	101.481	74.1038	74.6225	104.405	38.7807	84.5897	113.228	102.024	109.085	81.4715
ENSRNOT00000076124	0.88201	0	1.17316	0.561522	0	0.978255	0	0.606289	0	0	0.58918	1.14283
ENSRNOT00000076148	0	0	0	0	0	0	0	0	0	0	0	0
ENSRNOT00000076150	1.10051	0	0.995025	0	0	1.1312	0	1.05507	1.09031	0	1.11596	1.07762
ENSRNOT00000076154	2.12817	0	1.54404	0	2.36125	6.75348	4.07338	3.8369	0	2.49318	4.25669	0.77733
ENSRNOT00000076171	0	0	0	0	0	0	0	0	0	0	0	0
ENSRNOT00000076180	0	0	0	0	0	0	0	0	0	0	0	0
ENSRNOT00000076224	2.57038	10.6742	7.25495	12.1494	7.7987	23.683	8.16138	26.2839	16.321	7.39561	2.67192	15.2688
ENSRNOT00000076236	79.82	87.4019	72.3753	37.7863	89.2718	109.035	90.4175	59.8517	63.22	85.4175	72.8145	60.3375
ENSRNOT00000076237	3.64174	0	1.88855	0	1.04878	0	0	2.12294	0	3.34008	2.23038	1.07193
ENSRNOT00000076263	0	0	0	0	0	0	0	0	0	0	0	0
ENSRNOT00000076265	0	0.001545	1.24822	0	1.29446	0	0	0	0	0.000153	0	0
ENSRNOT00000076282	0.807571	0	2.22718	0.532177	0	1.3026	0	0.568816	0	0	0.570185	0
ENSRNOT00000076290	0	0	0	0	0	0	0	0	0	0	0	0
ENSRNOT00000076301	21.3395	15.9133	21.7321	20.9573	18.0708	5.59004	17.778	8.35842	42.1961	25.1963	17.889	30.9864
ENSRNOT00000076303	0	0	0	0	0	0	0	0	0	0	0	0
ENSRNOT00000076322	39.6363	66.2248	31.3284	59.0512	45.2875	57.4439	37.4719	43.9063	76.2596	42.3988	76.0276	65.5033
ENSRNOT00000076347	0	0	0	0	0	0	0	0	0	0	0	0
ENSRNOT00000076358	51.2042	30.9875	14.7498	12.4427	23.4215	59.6764	16.7829	20.1676	11.1115	26.2616	26.962	17.9774
ENSRNOT00000076363	0	8.40075	1.63316	5.07583	1.23217	8.54462	5.44737	3.28868	2.09047	8.59508	8.15226	12.306
ENSRNOT00000076368	0	0	0	0	0	0	0	0	0	0	0	2.27056
ENSRNOT00000076385	119.067	107.984	179.347	190.535	156.807	212.122	133.376	225.481	131.027	148.523	157.808	227.122
ENSRNOT00000076395	12.715	8.91965	8.34298	5.91384	8.64141	12.3843	7.04559	5.55002	4.27496	8.32955	5.04015	10.7295
ENSRNOT00000076454	3.27288	36.9203	19.6317	59.1571	31.9113	71.8878	48.4239	34.1056	69.241	59.5551	53.3939	56.4272
ENSRNOT00000076463	211.473	96.5198	154.906	95.1723	126.125	133.482	115.492	153.281	144.767	153.929	110.509	138.134
ENSRNOT00000076492	29.6338	21.8472	51.2818	4.90127	36.1565	32.5153	45.1584	30.74	58.7964	15.3009	14.6642	57.9058
ENSRNOT00000076494	71.6107	136.685	42.8146	29.7807	78.8864	99.0764	83.7022	80.8614	67.3101	106.161	74.9662	89.4313
ENSRNOT00000076498	0	0	0	1.60508	0	0	0	0	0	0	15.6601	0
ENSRNOT00000076500	0	0	0	0	0	0	0	0	0	0	0	0
ENSRNOT00000076509	83.9	38.2316	49.7476	35.3684	32.9521	46.5689	46.7131	62.1858	55.1913	61.7451	28.5545	25.7613
ENSRNOT00000076517	0	0	0	0	0	0	0	0	0	0	0	0
ENSRNOT00000076523	0	0	0	0	0	0	0	0	0	0	0	0
ENSRNOT00000076524	15.3823	23.3254	20.015	18.8546	19.7472	27.5093	36.0949	21.8909	32.233	55.0604	27.859	59.7651
ENSRNOT00000076561	777.765	135.55	264.262	160.7	22.731	18.3324	369.349	572.205	179.318	183.459	269.976	219.645
ENSRNOT00000076566	0	0	0	0	0	0	0	0	0	0	0	0
ENSRNOT00000076576	0	0	0	0	0	0	1.2335	0	1.2912	0	0	0
ENSRNOT00000076586	0.526469	6.04622	3.11064	4.32998	1.59323	18.2415	5.81587	1.06988	3.8962	4.3366	4.64021	8.24013
ENSRNOT00000076600	6.19039	0	4.13774	3.80794	8.56983	4.22711	4.13676	0	1.44444	6.82551	0	1.36209
ENSRNOT00000076603	1683.54	1804.34	1691.77	1074.47	2212.87	1514.54	1098.97	1401.35	1247.64	1517.4	1485.64	1249.57
ENSRNOT00000076605	0	0	0	0	0	0	0	0	0	0	0	0
ENSRNOT00000076615	0	0	0	0	0	0	0	0	0	0	0	0
ENSRNOT00000076632	0	0	0	0	0	0	0	0	0	0	0	0
ENSRNOT00000076638	0	0	0	0	0	0	0	0	0	0	0	0
ENSRNOT00000076663	300.009	284.466	306.157	414.623	454.501	572.126	507.057	415.193	403.66	486.163	508.263	509.135
ENSRNOT00000076677	1.43531	2.48747	1.07319	0	1.1737	2.33726	0	0	3.3012	2.34812	1.19615	0
ENSRNOT00000076715	0	0	0	0	0	0	0	0	0	0	0	0
ENSRNOT00000076718	0	0	0	0	0	0	0	0	0	0	0	0
ENSRNOT00000076719	261.887	95.9667	211.254	168.16	162.308	171.744	236.683	186.503	167.029	213.886	226.062	186.927
ENSRNOT00000076744	0	0	0	0	0	0	0	0	0	0	0	0
ENSRNOT00000076759	3.65732	5.49182	0	0	2.12331	2.84816	0.9594	0.975754	0	0	0	4.44952
ENSRNOT00000076767	0	0	0	0	0	0	0	0	0	0	0	0
ENSRNOT00000076778	0	0	0	0	0	0	2.19848	0	0	2.06142	2.15231	0
ENSRNOT00000076835	23.0782	19.1276	16.8903	25.7978	10.6015	34.5674	20.5851	29.53	46.0727	32.7568	52.8328	35.8548
ENSRNOT00000076838	50.9517	3.74964	8.31744	0.963134	9.77084	2.11658	4.92243	13.3337	20.9717	15.8973	2.16924	6.72592
ENSRNOT00000076843	0	0	0.01107	8.76928	0	0.918838	0	1.99254	3.67101	2.92221	0.912126	10.8443
ENSRNOT00000076845	0	0	0	1.70607	0	0	0	0	0	0	1.71492	1.60545
ENSRNOT00000076847	11.5378	7.11827	4.88486	4.5747	0	14.2486	8.05328	17.6612	19.1377	9.89715	2.51765	18.9532
ENSRNOT00000076853	0	0	0	0	0	0	0	0	0	0	0	0
ENSRNOT00000076861	0	0	0	0	0	0	0	0	0	0	0	2.16377
ENSRNOT00000076867	32.8797	14.8898	6.45685	10.2288	19.2412	12.9381	15.7865	10.9639	21.2782	34.639	20.3736	11.7361
ENSRNOT00000076871	0.001641	0	0.176605	0.159242	0.00047	1.15591	0.001746	0.012463	0.626064	0.085821	0.064549	0.088472
ENSRNOT00000076888	2782.04	2233.94	2190.99	2614.49	3292.48	3505.28	2747.11	2649.56	2071.19	2519.07	2288.58	2930.35
ENSRNOT00000076902	69.8888	107.374	72.7412	55.943	69.2086	69.2906	76.2166	95.1151	114.901	156.92	85.2452	93.8942
ENSRNOT00000076905	0	0	0	0	0	0	0	0	0	0	0	0
ENSRNOT00000076920	17.6181	0	0.001215	0.030604	6.69826	0.167192	0.618793	0.15128	0.385453	0.160808	0.419248	0.122385
ENSRNOT00000076934	0	0	0	0	0	0	0	0	0	0	0	0
ENSRNOT00000076937	0	1.18701	0	0	0	0	0	0	0	0	1.24641	0
ENSRNOT00000076968	0	1.71925	0	0	0	1.6574	0	0	4.9249	1.62587	0	0
ENSRNOT00000076984	0	0	0	0	0	0	0	0	0	0	0	0
ENSRNOT00000077029	0	4.8443	0	0	0	0	2.69963	0	7.48	0	2.41968	0
ENSRNOT00000077061	0	0	0	0	0	0	0	0	0	0	0	0
ENSRNOT00000077064	0	3.95627	0	1.54753	0	0	0.829498	2.31062	18.3864	24.7206	10.5903	0
ENSRNOT00000077075	0	0	0	0	0	0	0	0	0	0	0	0
ENSRNOT00000077076	0	0	0	0	0	0	0	0	0	0	0	0
ENSRNOT00000077077	0	0	0	0	0	0	0	0	0	3.15352	0	0
ENSRNOT00000077084	2.77938	2.82536	0.949784	13.2765	0	2.8834	3.63803	6.29614	6.71791	6.63409	3.07526	3.71834
ENSRNOT00000077086	0.000114	7.31329	11.5039	0.864232	0	2.52793	4.19804	4.91696	9.60672	25.9299	8.47792	18.9554
ENSRNOT00000077088	0	0	0	0	0	0	0	0	0	0	0	0
ENSRNOT00000077089	0	0	0	0	0	0	0	0	0	1.32345	0	0
ENSRNOT00000077090	0	0	0	0	0	0	0	0	0	0	0	0
ENSRNOT00000077093	0	0	0	0	0	0	0	0	0	0	0	0
ENSRNOT00000077095	0	0	0	0	0	0	0	0	0	0	0	0
ENSRNOT00000077098	62.5456	89.472	44.4965	45.2429	101.402	43.0645	70.2287	36.6235	80.0485	73.7186	115.869	53.0167
ENSRNOT00000077102	0	0	0	0	0	0	0	0	0	0	0	0
ENSRNOT00000077103	0	0	0	0	0	0	0	0	0	0	0	0
ENSRNOT00000077112	1416.57	4005.55	2307.15	1556.04	2219.8	2823.18	1625.62	1937.31	2121.92	2211.36	2109.14	2096.4
ENSRNOT00000077121	0	0	0	0	0	0	0	0	0	0	0	0
ENSRNOT00000077123	0	0	0	0	0	0	0	0	0	0	0	0
ENSRNOT00000077124	0	0	0	0	0	0	0	0	0	0	0	0
ENSRNOT00000077128	0	0.652247	0.099432	0.011814	0	0	0	0	0	0	0	0
ENSRNOT00000077131	0	0	0	0	0	0	0	0	0	0	0	0
ENSRNOT00000077132	70.1514	70.4427	47.4125	54.4207	65.9899	91.2756	77.2065	67.6913	99.2723	119.698	88.7359	86.3832
ENSRNOT00000077138	66.8661	36.3883	47.3638	64.2416	69.7258	58.5603	66.4996	61.952	54.8764	65.6373	66.706	62.0109
ENSRNOT00000077139	0	0	0	0	0	0	0	0	0	0	0	0
ENSRNOT00000077144	0	0	0	0	0	0	0	0	0	0	0	0
ENSRNOT00000077149	0	0	0	0	0	1.9418	2.17997	0	0	0	0	0
ENSRNOT00000077150	0	0	0	0	0	0	0	0	0	0	0	0
ENSRNOT00000077151	3.53338	2.84983	3.22111	3.84931	1.47009	7.18667	3.19682	3.44543	16.7846	14.9967	11.1323	4.00658
ENSRNOT00000077159	0	0	0	0	0	0	0	0	0	0	0	0
ENSRNOT00000077173	0	5.05385	0	0	0	0	0	0	0	0	0	0
ENSRNOT00000077174	18.1568	67.7295	14.757	3.1667	10.509	19.4812	10.1736	23.8093	311.489	477.069	141.834	1.64319
ENSRNOT00000077179	0	0	0	0	0	0	0	0	0	0	0	0
ENSRNOT00000077181	0	0	0	0	0	0	0	0	0	0	0	0
ENSRNOT00000077182	0	0	0	0	0	0	0	0	0	0	0	0
ENSRNOT00000077184	0	0	0	0	0	0	0	0	0	0	0	0
ENSRNOT00000077192	0	1.78524	0.898202	1.81234	0	5.45936	3.768	3.70837	1.86484	4.37326	3.7545	0.876435
ENSRNOT00000077198	0	3.2e-05	2.5e-05	0	0.001369	11.7945	0	0	2.55103	0	1.21389	2.66624
ENSRNOT00000077204	6.53017	0	3.36159	3.11415	0	0	0	0	0	0	0	6.49748
ENSRNOT00000077210	0	0	0	0	0	0	0	0	0	0	0	0
ENSRNOT00000077214	0	0	0	0	0	0	0	0	0	0	0	0
ENSRNOT00000077223	0	0	0	0	0	0	0	0	0	0	0	1.28611
ENSRNOT00000077224	0	0	0	0	0	0	0	0	0	0	0	0
ENSRNOT00000077229	0	0	0	0	0	0	0	0	0	0	0	0
ENSRNOT00000077232	0	0	0	0	0	0	0	0	0	0	0	0
ENSRNOT00000077235	0	0	0	0	0	0	0	0	0	0	0	0
ENSRNOT00000077237	0	0	0	0	0	2.29274	0	0	2.39492	4.50557	0	0
ENSRNOT00000077239	0	0	0	0	0	0	0	0	0	0	0	0
ENSRNOT00000077240	0	0	0	0	0	0	0	0	0	0	0	0
ENSRNOT00000077249	0	0	0	0	0	0	0	0	0	0	0	0
ENSRNOT00000077252	0	0	0	0	0	0	0	0	0	0	0	0
ENSRNOT00000077263	0	0	0	0	0	0	0	0	1.41322	0	0	0
ENSRNOT00000077264	4.19252	0	0	0	1.80215	0	0	0	0	0	0	1.99788
ENSRNOT00000077266	0	0.584735	2.01572	0	0	1.81109	0	0	0	0	1.0444	7.42625
ENSRNOT00000077277	24.3817	32.4493	17.4942	23.6531	10.1968	41.7427	29.6133	9.90968	18.7405	23.9333	21.959	21.814
ENSRNOT00000077288	0	0	0	0	0	0	0	0	0	0	0	0
ENSRNOT00000077292	0	0	0.00349	0	0	0	0	0	0	0	0	0
ENSRNOT00000077294	2.86899	24.0233	5.36434	1.3061	8.39824	11.8619	4.11843	16.465	8.17104	5.23334	5.39407	5.04076
ENSRNOT00000077298	0	0	0	3.05091	1.25879	0	0	0	1.1283	0	0	1.70505
ENSRNOT00000077309	89.1168	210.716	86.5011	135.757	144.186	151.877	131.192	136.548	125.519	156.454	177.504	179.515
ENSRNOT00000077312	0	0	0	0	0	0	0	0	0	0	0	0
ENSRNOT00000077315	0	0	0	0	0	0	0	0	0	0	0	0
ENSRNOT00000077316	5.53794	10.7029	17.0308	19.8564	14.8837	22.192	15.6242	19.1592	34.6899	26.4209	10.2514	21.2419
ENSRNOT00000077319	2.48684	0	3.18135	1.4752	2.60476	7.95419	1.18377	0	3.18163	1.22866	1.4862	0.706857
ENSRNOT00000077323	26.8873	20.1628	29.638	49.8809	31.6311	38.2943	28.6983	43.5013	29.3266	40.0357	39.0373	51.6777
ENSRNOT00000077335	0	0	0	0	0	0	0	0	0	0	0	0
ENSRNOT00000077346	0	0	0	0	0	0	0	0	0	0	0	0
ENSRNOT00000077348	0	0	0	0	0	0	0	0	0	0	0	0
ENSRNOT00000077352	0	1.63226	0	0	0	0	0.93256	0.737897	3.59227	0.888638	0	2.06118
ENSRNOT00000077355	0	0	0	0	0	4.14224	0	0	1.27716	2.52358	0	1.19624
ENSRNOT00000077366	0	0	0	0	0	0	0	0	0	0	0	0
ENSRNOT00000077376	0	0	0	0	0	0	0	0	0	0	0	0
ENSRNOT00000077379	0	0	0	0	0	0	0	0	0	0	0	0
ENSRNOT00000077381	33.8286	5.92315	9.31563	3.23812	0.793688	9.25807	4.1315	1.57178	1.65447	6.46999	1.73135	3.27546
ENSRNOT00000077387	388.836	231.21	288.309	302.246	389.002	361.191	423.307	383.351	399.999	384.872	386.778	404.767
ENSRNOT00000077392	0	0	0	0	0	0	0	0	0	0	0	0.769166
ENSRNOT00000077394	0	0	0	0	0	0	0	0	0	0	0	0
ENSRNOT00000077399	0	0	0	0	0	0	0	0	0	0	0	0
ENSRNOT00000077404	275.884	77.5193	172.358	128.948	162.412	119.819	176.301	192.585	180.545	214.3	156.374	191.831
ENSRNOT00000077413	0	0	0	0	0	0	0	0	0	0	0	0
ENSRNOT00000077422	0	1.15643	0	0	0	0	2.88861	0	0	2.69971	0	2.49634
ENSRNOT00000077424	0	0	0	0	0	0	0	0	0	0	0	0
ENSRNOT00000077426	0	0	0	0	0	0	0	0	0	0	0	0
ENSRNOT00000077449	0	0	0	0	0	1.08989	0	0.9743	0	0	0	0
ENSRNOT00000077467	0	0	0	0	0	0	0	0	0	0	0	0
ENSRNOT00000077476	0	0	0	0	0	0	0	0	0	0	0	0
ENSRNOT00000077485	0	0	0	0	0	0	0	0	0	0	0	0
ENSRNOT00000077494	0	0	0	0	0	0	0	0	0	0	0	0
ENSRNOT00000077497	0	0	0	0	0	0	0	0	0	0	0	0
ENSRNOT00000077499	0	0	0	0	0	0	0	0	0	0	0	0
ENSRNOT00000077506	0	0	5.07648	0	0	1.36075	4.07283	1.28429	1.30604	9.35192	0	1.31003
ENSRNOT00000077509	9.88986	3.64313	5.05732	2.6571	3.54131	10.1702	7.14198	5.16345	7.33712	13.2802	5.62589	8.88077
ENSRNOT00000077519	0	0	0	0	0	0	0	0	0	0	0	0
ENSRNOT00000077531	0	0	0	0	0	0	0	0	0	0	0	0
ENSRNOT00000077533	0	0	0	0	0	0	0	0	0	0	0	0
ENSRNOT00000077545	0	0	0	0	0	0	0	0	0	0	0	0
ENSRNOT00000077548	0	0	0	0	0	0	0	0	0	0	0	0
ENSRNOT00000077550	0	0	0	0	0	0	0	0	0	5.29659	0	0
ENSRNOT00000077552	0	0	0	0	0	0	0	0	0	0	0	0
ENSRNOT00000077556	0	0	0	0	0	0	0	0	0	0	0	0
ENSRNOT00000077565	0	0	0	0	0	0	0	0	0	0	0	0
ENSRNOT00000077575	49.8939	80.4725	59.4667	45.7054	47.3533	53.7085	62.9942	51.318	55.41	73.6418	56.9644	86.9223
ENSRNOT00000077586	2.07336	0.926619	0	0	0	0	0	2.50896	0.684901	1.2207	0.814924	0.689931
ENSRNOT00000077589	0	6.01503	0	0	0	0	4.58371	0	0	1.2325	0.165989	0
ENSRNOT00000077590	0	0	0	0	0	0	0	0	0	0	0	0
ENSRNOT00000077595	0	0	0	0	0	0	0	0	0	0	0	0
ENSRNOT00000077599	0	0	0	0	0	2.39741	0	0	0	0	0	0
ENSRNOT00000077611	0	0	0	0	0	0	0	0	0	0	0	0
ENSRNOT00000077614	8.533	7.04035	4.08724	8.74243	11.2079	7.70212	4.33126	6.3423	4.87512	3.81753	8.57976	7.07264
ENSRNOT00000077618	102.369	99.5846	83.4239	129.866	111.897	154.524	119.655	123.125	103.529	129.069	115.425	146.186
ENSRNOT00000077631	24.9912	21.9173	55.384	13.4936	52.8411	33.0244	10.1809	33.9767	31.7578	39.706	28.1096	36.6284
ENSRNOT00000077644	0	0	0	0	0	0	0	0	0	0	0	0
ENSRNOT00000077647	0	0	0	0	0	0	0	0	0	0	0	0
ENSRNOT00000077648	0	0	0	0	0	0	0	0	0	0	0	0
ENSRNOT00000077658	0	0	0	0	0	0	0	0	0	0	0	0
ENSRNOT00000077675	0	0	0	0	0	0	0	0	0.000477	0	0	0
ENSRNOT00000077676	0	0	0	0	0	0	0	0	0	0	0	0
ENSRNOT00000077683	0	0	0	0	3.32142	0	0	0	0	0	0	0
ENSRNOT00000077685	0	0	0	0	0	0	0	0	0	0	0	0
ENSRNOT00000077688	0	0	0	0	0	0	0	0	0	0	0	0
ENSRNOT00000077692	0	0	0	0	0	0	0	0	0	0	0	0
ENSRNOT00000077693	0	0	0	0	0	0	0	0	0	0	0	0
ENSRNOT00000077704	0	0	0	0	0	0	0	0	0	0	0	0
ENSRNOT00000077705	0	0	0.381675	0	0	0	0	0.092075	0	0	0	0
ENSRNOT00000077712	0	1.14704	0	0	0	0	0	0	0	0	0.000675	0
ENSRNOT00000077721	0	0	0	0	0	0	0	0	0	0	0	0
ENSRNOT00000077722	0	0	0	0	0	0	0	0	0	0	0	0
ENSRNOT00000077723	0	0	0	0	0	0	0	0	0	0	0	0
ENSRNOT00000077728	0	0	0	0	0	0	0	0	3.30142	0	0	0
ENSRNOT00000077734	0	0	0	0	0	0	0	0	0	0	0	0
ENSRNOT00000077735	26.2717	23.4465	23.5227	30.1375	51.5604	48.5677	44.2696	25.2318	38.7899	37.9739	42.214	54.13
ENSRNOT00000077737	0	0	0	0	0	0	0	0	0	0	0	0
ENSRNOT00000077759	0	0	0	0	0	0	0	0	0	0	0	0
ENSRNOT00000077766	0	0	0	0	0	0	0	0	0	0	0	0
ENSRNOT00000077775	0	0	0	0	0	0	0	0	0	0	0	0
ENSRNOT00000077777	0	0	0	0	0	0	0	0	0	0	0	0
ENSRNOT00000077785	127.16	54.5263	72.2576	81.0278	106.404	78.4995	93.0428	92.6698	97.5162	96.1789	106.053	100.903
ENSRNOT00000077787	149.274	135.509	128.692	106.853	99.1073	150.387	118.093	131.264	152.55	169.831	126.895	130.139
ENSRNOT00000077794	694.623	878.591	660.755	450.652	692.321	771.005	535.489	586.656	601.975	678.42	663.512	714.858
ENSRNOT00000077796	0	0	0	0	0	0	0	0	0	0	0	0
ENSRNOT00000077802	0	0	0	0	0	0	0	0	0	0	0	0
ENSRNOT00000077804	78.262	72.6605	89.6931	146.403	99.5655	159.579	108.235	117.263	123.008	168.568	149.241	169.421
ENSRNOT00000077806	0	0	0	0	0	0	0	0	0	0	0	0
ENSRNOT00000077813	0	0	0	0	0	0	0	0	0	0	0	0
ENSRNOT00000077816	0	0	0	0	0	0	0	0	0	0	0	0
ENSRNOT00000077817	0	0	0	0	0	0	0	0	0	0	0	0
ENSRNOT00000077822	0	0	0	0	0	0	0	0	0	0	0	0
ENSRNOT00000077829	0	0	0	0	0	0	0	0	0	0	0	0
ENSRNOT00000077833	0	0	0	0	0	0	0	0	0	0	0	0
ENSRNOT00000077835	0	0	0	0	0	0	0	0	0	0	0	0
ENSRNOT00000077836	5.46718	12.7297	6.63428	16.8688	8.19899	8.35707	13.1152	11.4297	64.3756	63.8994	50.717	21.5578
ENSRNOT00000077838	4.4478	4.84567	8.13765	2.66853	5.83882	7.13052	2.67012	4.97468	5.48891	4.04007	4.98254	3.29187
ENSRNOT00000077842	0	1e-06	0	0	0	0	0	0	0	0	0	0
ENSRNOT00000077850	0	0	0	0	0	0	0	0	0	0	0	0
ENSRNOT00000077851	0	0	0	0	0	0	0	0	0	0	0	0
ENSRNOT00000077852	0	0	1.3908	0	0	0	0	0	0	0	0	0
ENSRNOT00000077855	0	0	0	0	0	0	0	0	0	0	0	0
ENSRNOT00000077862	0	0	0	0	0	0	0	0	0	0	0	0
ENSRNOT00000077867	29.7519	2.24123	3.61605	0	0.283835	13.8706	1.23953	4.05789	36.1708	1.19549	0.407766	1.17393
ENSRNOT00000077876	342.363	568.936	390.191	428.43	466.808	581.003	353.097	474.361	459.68	522.37	512.546	450.247
ENSRNOT00000077879	0	0	0	0	0	0	0	0	0	0	0	0
ENSRNOT00000077887	0	0	0	0	0	0	0	0	0	0	0	0
ENSRNOT00000077893	0	0	0	0	0	0	0	0	0	0	0	0
ENSRNOT00000077896	0	0	0	0	0	0	0	0	0	0	0	0
ENSRNOT00000077902	0	0	0	0	0	0	0	0	0	0	0	0
ENSRNOT00000077906	0	0	0	0	0	0	0	0	0	0	0	0
ENSRNOT00000077914	0	0	0	0	0	0	0	0	0	0	0	0
ENSRNOT00000077915	0	0	0	0	0	0	0	0	0	0	0	0
ENSRNOT00000077916	0	0	0	0	0	0	1.11201	0	3.26274	3.15661	2.11126	0
ENSRNOT00000077919	0	0	0	0	0	0	0	0	0	0	0	0
ENSRNOT00000077925	0	0	0	0	0	0	0	0	0	0	0	0
ENSRNOT00000077932	0	0	0	0	0	0	0	0	0	0	0	0
ENSRNOT00000077934	0	0	0	0	0	0	0	0	0	0	0	0
ENSRNOT00000077944	0	0	0	0	0	0	0	0	0	0	0	0
ENSRNOT00000077945	0	0	0	0	0	0	0	0	0	0	0	0
ENSRNOT00000077957	0	0	0	0	0	0	0	1.42956	0	0	0	1.47752
ENSRNOT00000077965	0	0.887552	0	0	0	0.041912	0	0	0	0	0	0
ENSRNOT00000077969	0	0	0	0	0	0	0	0	0	0	0	0
ENSRNOT00000077982	0	0	0	0	0	0	0	0	0	0	0	0
ENSRNOT00000077989	0	0	0	0	0	0	0	0	0	0	0	0
ENSRNOT00000077997	0	0	0	0	0	0	0	0	0	0	0	0
ENSRNOT00000078015	0	0	0	0	0	0	0	0	0	0	0	0
ENSRNOT00000078019	93.462	121.255	111.686	77.1639	82.0765	92.4603	119.25	122.682	157.019	132.481	141.952	134.076
ENSRNOT00000078024	0	0	0	0	0	0	1.59465	0	0	0	0	0
ENSRNOT00000078027	0	0	0	0	0	0	0	0.565841	0	1.30562	0	0
ENSRNOT00000078040	0	0	0	0	0	0	0	0	0	0	0	0
ENSRNOT00000078043	0	0	0	0	0	1.25237	0	0	0	0	0	0
ENSRNOT00000078049	0	0	0	0	0	0	0	0	0	0	0	0
ENSRNOT00000078056	1.69622	0	0	0	0	0	0	1.25118	0	0	0	0
ENSRNOT00000078057	0	0	0	0	0	0	0	0	0	0	0	0
ENSRNOT00000078065	3.67985	2.431	1.17049	2.20399	1.17577	0	2.44432	2.33418	0	2.18225	1.20936	0
ENSRNOT00000078079	0	0	0	0	0	0	0	0	0	0	0	0
ENSRNOT00000078083	0	0	0	0	0	0	0	0	0	0	0	0
ENSRNOT00000078087	1.02323	0	0	0	0	0.404473	0.768346	0.763469	0.377039	0	0	0.346165
ENSRNOT00000078088	0	0	0	0	0	0	0	0	3.98872	0	0	0
ENSRNOT00000078089	0	0	0	0	0	0	0	0	0	0	0	0
ENSRNOT00000078105	0	0	0	0	0	0	0	0	0	0	0	0
ENSRNOT00000078112	0	0	0	0	0	0	0	0	0	0	0	0
ENSRNOT00000078119	0	0	0	0	0	0	0	0	0	0	0	0
ENSRNOT00000078120	8e-06	0	5.93964	1.01445	0	0	1.02502	0.000569	0.151804	1.01904	0	0.980656
ENSRNOT00000078124	0	0	0	0	0	0	0	0	0	0	0	0
ENSRNOT00000078130	0	0	0	0	0	0	0	0	0	1.62003	0	1.59871
ENSRNOT00000078133	0	0	0	0	0	0	0	0	0	0	0	0
ENSRNOT00000078138	0	0	0	0	0	0	0	0	0	0	0	0
ENSRNOT00000078139	0	0	0	0	0	0	0	0	0	0	0	0
ENSRNOT00000078143	0	0	0	0	0	0	0	0	0	0	0	0
ENSRNOT00000078149	0	0	0	0	0	0	0	0	0	0	0	0
ENSRNOT00000078151	0	0	0	0	0	0	0	0	0	0	0	0
ENSRNOT00000078154	0	0	0	0	0	0	0	0	0	0	0	0
ENSRNOT00000078167	0	0	0	0	0	0	0	0	0	0	0	0
ENSRNOT00000078172	0	0	0	0	0	0	0	0	0	0	0	0
ENSRNOT00000078177	0	0	0	0	0	0	0	0	0	0	0	0
ENSRNOT00000078178	24.062	18.4683	8.2326	11.0766	6.74873	20.8113	6.90879	13.2214	10.3375	6.38565	11.6872	11.2964
ENSRNOT00000078183	28.8688	30.7157	27.6661	39.0714	38.6435	33.5363	43.4309	46.8275	33.5582	47.8472	51.4154	37.6979
ENSRNOT00000078188	0	0	0	0	0	0	0	0	0	0	0	0
ENSRNOT00000078191	0	0	0	0	0	0	0	0	0	0	0	0
ENSRNOT00000078197	0.783711	0	0	0	0	0	0	0	4.52498	0	1.73386	2.95537
ENSRNOT00000078199	0	0	0	0	0	0	0	0	0	0	0	0
ENSRNOT00000078200	0	0	0	0	0	0.189034	5.54874	1.02325	0.81765	1.87543	1.25915	0
ENSRNOT00000078201	0	0.894552	0	0	0.990676	0.926021	0.971945	0.924255	0	0	0.922038	0
ENSRNOT00000078204	0	0	0	0	5.768	0	0	0	0	0	2.23595	0
ENSRNOT00000078205	8e-06	3.44459	0.979246	11.2225	12.0203	5.0511	3.44677	6.94559	0.000578	5.76707	8.2435	6.02732
ENSRNOT00000078208	0	0	0	0	0	0	0	0	0	0	0	0
ENSRNOT00000078209	0	0	0	0	0	0	0	0	0	0	0	0
ENSRNOT00000078223	0	0	0	0	0	0	0	0	0	0	0	0.934547
ENSRNOT00000078224	0	0	0	0	0	0	0	0	0	0	0	0
ENSRNOT00000078230	0	0	0	0	0	0	0	0	0	0	0	0
ENSRNOT00000078247	0	0	0	0	0	0	0	0	0	0	0	0
ENSRNOT00000078256	0	0	0	0	0	0	0	0	0	0	0	0
ENSRNOT00000078257	0	0	0	0	0	0	0	0	0	0	0	0
ENSRNOT00000078262	0	0	0	0	0	0	0	0	0	0	0	0
ENSRNOT00000078268	0	0	0	0	0	0	0	0	0	0	0	0
ENSRNOT00000078276	0	0	0	0	0	0	0	0	0	0	0	0
ENSRNOT00000078281	12.9302	0	3.59602	0	0.023268	0	0	18.8321	0.014304	8.25087	1.64478	9.52968
ENSRNOT00000078292	0	0	0	0	5.71651	0	0	0	0	0	2.58374	0
ENSRNOT00000078294	0	0	0	0	0	0	0	0	0	0	0	0
ENSRNOT00000078296	0	0	0	0	0	0	0	0	0	0	0	0
ENSRNOT00000078297	14.3245	1.29912	1.4418	0	7.78056	0	5.37883	2.91005	2.67405	6.53626	0	0
ENSRNOT00000078305	0	0	0	0	0	0	0	0	0	0	0	0
ENSRNOT00000078313	0	0	0	0	0	0	0	0	0	0	0	0
ENSRNOT00000078314	0	0	0	0	0	0	0	0	0	0	0	0
ENSRNOT00000078319	15.3227	3.62683	10.891	4.58048	14.4336	7.92437	5.03073	10.1855	7.26295	5.00216	4.04056	8.12278
ENSRNOT00000078325	0	0	0	0	0	0	0	0	0	0	0	0
ENSRNOT00000078330	91.2638	123.895	112.806	36.4128	105.705	109.743	22.1721	65.1609	99.9336	82.6927	53.4669	74.9622
ENSRNOT00000078332	0	0	1.02763	0	0	0	0	0	0	0	0	0
ENSRNOT00000078344	1.4083	0	0	0	0	0	0	0	1.44985	0	0	0
ENSRNOT00000078346	0	0	0	0	0	0	1.31081	0	0	0	0	0
ENSRNOT00000078356	0	0	0	0	0	0	0	0	0	0	0	0
ENSRNOT00000078358	0	0	0	0	0	0	0	0	0	0	0	0
ENSRNOT00000078360	0	0	0	0	0	0	0	0	0	0	0	0
ENSRNOT00000078361	0	0	0	0	0	0	0	0	0	0	0	0
ENSRNOT00000078364	0	0	0	0	0	0	0	0	0	0	0	0
ENSRNOT00000078370	0	0.961766	1.55633	0.844471	1.59073	0	0	0	2.65875	1.80595	2.79576	0.857272
ENSRNOT00000078374	0	0	0	0	0	0	0	0	0	0	0	0
ENSRNOT00000078384	0	0	0	0	0	0	0	0	0	0	0	0
ENSRNOT00000078386	0	0	0	0	0	0	0	0	0	0	0	0
ENSRNOT00000078400	474.243	322.706	360.292	372.57	385.98	430.884	426.981	433.319	440.937	457.927	433.817	433.305
ENSRNOT00000078407	0	0	0	0	0	0	0	0	0	0	0	0
ENSRNOT00000078408	0	0	0	0	0	0	0	0	0	0	0	0
ENSRNOT00000078414	0	1.2659	0	0	0	0	1.61144	0	0	0	0	0
ENSRNOT00000078417	1.42685	0	4.66756	0	0	0	0	0	7.82131	5.17214	0	2.53502
ENSRNOT00000078418	0	0	0	0	0	0	0	0	0	0	0	0
ENSRNOT00000078431	168.801	54.4998	98.1148	152.64	133.698	130.993	131.618	103.53	79.4957	110.686	182.96	161.747
ENSRNOT00000078433	0	0	0	0	0	0	0	0	0	0	0	0
ENSRNOT00000078437	0	0.758936	0	0	0	0.29473	0	0	0	0	0	0
ENSRNOT00000078455	0	0	0	0	0	0	0	0	0	0	0	0
ENSRNOT00000078461	0	0	0	0	0	0	0	0	0	0	0	0
ENSRNOT00000078468	0	0	0	0	2.0548	1.90515	0	0	3.89895	0	7.85792	1.85208
ENSRNOT00000078470	0	0	0	0	0	0	0	0	0	0	0	0
ENSRNOT00000078476	0	0	0	0	0	0	0	0	0	0	0	0
ENSRNOT00000078479	0	0	0	0	0	0	0	0	0	0	0	0
ENSRNOT00000078481	0	0	0	0	0	0	0	0	0	0	0	0
ENSRNOT00000078486	0	0	0	0	0	0.272341	0	0	0	0.293192	0	0
ENSRNOT00000078489	0	0	0	0	0	0	0	0	0	0	0	0
ENSRNOT00000078491	0	0	0	0	0	0	0	0	0	0	0	0
ENSRNOT00000078493	5.08472	4.16248	7.12782	1.58308	7.7365	3.29922	5.17201	10.3302	9.12474	5.67404	9.37685	5.64446
ENSRNOT00000078497	0	0	0	0	0	0	0	0	0	0	0	0
ENSRNOT00000078499	0	0	0	0	0	0	0	0	0	0	0	0
ENSRNOT00000078509	0	0	0	16.9934	0	20.8855	0	2.21838	0	0	0	4.24309
ENSRNOT00000078517	0	0	0	0	0	0	0	0	0	0	0	0
ENSRNOT00000078520	0	0	0	0	0	0	0	0	0	0	0	0
ENSRNOT00000078522	0	0	0	0	0	0	0	0	0	0	0	0
ENSRNOT00000078536	0	0	0	0	0	0	0	0	0	0	0	0
ENSRNOT00000078550	0	0	0	0	0	0	0	0	0	0	0	0
ENSRNOT00000078551	0	0	0	0	0	0	0	0	0	0	0	0
ENSRNOT00000078552	0	0	0	0	0	0	0	0	0	0	0	0
ENSRNOT00000078560	0	0	0	0	0	0	0	0	0	0	0	0
ENSRNOT00000078563	0	0	0	0	0	0	0	0	0	0	0	0
ENSRNOT00000078565	0	0	0	0.465438	0	0	0	0	0	0	0	0
ENSRNOT00000078567	0	0	0	0	0	0	0	0	0	0	0	0
ENSRNOT00000078569	0	0	0	0	0	0	0	0	0	0	0	1.06167
ENSRNOT00000078574	2.11741	0	0	0	0	4.56963	0	0	0	1.17191	0	0
ENSRNOT00000078592	0	0	0	0	0	0	0	0	0	2.31929	0	0
ENSRNOT00000078596	1.22975	0	1.9951	0.975325	8.36369	3.15777	1.01901	0.973174	3.04817	2.00877	0	0
ENSRNOT00000078597	15.0453	55.8595	26.5005	41.0353	33.3581	30.5807	40.3779	37.8531	34.6335	21.0468	29.1457	49.3856
ENSRNOT00000078601	0	0	0	0	0	0	0	0	0	0	0	0
ENSRNOT00000078602	0	0	0	0	0	0	0	0	0	0	0	0
ENSRNOT00000078623	0	0	0	0	0	0	0	0	0	0	0	0
ENSRNOT00000078626	0	0	0	0	0	0	0	0	0	0	0	0
ENSRNOT00000078629	0	0	0	0	0	0	0	0	0	0	0	0
ENSRNOT00000078630	0	0	0	0	0	0	0	0	0	0	0	0
ENSRNOT00000078631	0	0	0	0	0	0	0	0	0	0	0	0
ENSRNOT00000078632	0	0	0	0	0	0	0	0	0	0	0	0
ENSRNOT00000078651	0	0	0	0	0	0	0	0	0	0	0	0
ENSRNOT00000078652	0	0	0	0	0	0	0	0	0	0	0	0
ENSRNOT00000078681	0	1.41546	0	0	2.02604	0.601956	0	0	0.493385	0	0	0
ENSRNOT00000078684	0	0	0	0	0	0	0	0	0	0	0	0
ENSRNOT00000078686	0	0	0	0	0	0	0	0	0	0	0	0
ENSRNOT00000078696	0	0	0	0	0	0	0	0	0	0	0	0
ENSRNOT00000078700	0	0	0	0	0	0	0	0	0	0	0	0
ENSRNOT00000078708	0	0	0	0	0	0	0	0	0	0	0	0
ENSRNOT00000078709	0	0	0	0	0	0	0	0	0	0	0	0
ENSRNOT00000078712	1.42722	5.47801	0	0	0	2.35927	1.26196	0	0	0	7.25361	2.23473
ENSRNOT00000078713	0	0	0	0	0	0	0	0	0	0	0	0
ENSRNOT00000078715	0	0	0	0	0	0	0	0	0	0	0	0
ENSRNOT00000078717	0	0	0	0	0	0	0	0	0	0	0	0
ENSRNOT00000078727	17.3182	29.2885	24.3859	8.68042	24.0466	18.0894	9.68126	19.2063	22.9852	65.055	26.9688	48.174
ENSRNOT00000078729	0	0	0	0	0	0	0	0	0	0	0	0
ENSRNOT00000078748	75.3258	69.5554	44.9861	47.6511	36.2514	112.251	80.9045	45.9803	92.6286	61.8344	75.0918	73.954
ENSRNOT00000078751	38.6418	25.9402	84.0643	16.9447	49.8237	19.9999	43.3222	49.5447	147.186	70.0768	36.2553	84.7233
ENSRNOT00000078753	0	0	0	0	0	0	0	0	0	0	0	0
ENSRNOT00000078755	0	0	0	0	0	1.05415	0	0	0	1.02917	0	0
ENSRNOT00000078756	0	0	0	0	0	0	0	0	0	1.9275	0	0
ENSRNOT00000078766	0	0	0	0	0	0	0	0	0	0	0	0
ENSRNOT00000078770	0	0	0	0	0	0	0	0	0	0	0	0
ENSRNOT00000078771	0	0	0	0	0	0	0	0	0	0	0	0
ENSRNOT00000078774	0	0	0	0	0	0	0	0	0	0	0	0
ENSRNOT00000078778	0	3.67351	0.000245	0	0	0	0	0	0	0	0	0.00138
ENSRNOT00000078782	0	4.54914	0	2.26232	7.00747	7.3154	4.97118	2.45926	2.43116	7.42766	2.45701	2.41338
ENSRNOT00000078796	0	0	0	0	0	0	0	0	0	0	0	0
ENSRNOT00000078804	0	0	0	0	0	0	0	0	0	0	0	0
ENSRNOT00000078812	0	0	0	0	0	0	0	0	0	0	0	0
ENSRNOT00000078817	0	0	0	0	0	0	0	0	0	0	0	0
ENSRNOT00000078831	1.05559	17.7539	5.50755	8.06229	5.936	5.97743	5.82756	4.45591	21.5853	33.7911	23.3975	4.74516
ENSRNOT00000078832	0	0	0	0	0	0	0	0	0	0	0	0
ENSRNOT00000078836	0	0	0	0	0	0	0	0	0	0	0	0
ENSRNOT00000078840	0	0	0	0	0	0	0	0	0	0	0	0
ENSRNOT00000078845	0	0	0	0	0	0	0	0	0	0	0	0
ENSRNOT00000078849	0	0	0	0	0	0	0	0	0	0	0	0
ENSRNOT00000078853	39.2376	29.1375	56.8164	21.4791	15.9427	17.7646	10.9766	84.208	36.9971	35.5965	32.0183	32.8726
ENSRNOT00000078854	209.922	253.28	203.462	252.056	241.21	343.227	260.322	220.107	195.401	284.239	258.022	351.667
ENSRNOT00000078863	1.6026	0	1.43563	0	0	0	0	0	0	0	0	1.49636
ENSRNOT00000078869	0	0	0	0	0	0	0	0	0	0	0	0
ENSRNOT00000078877	0	0	0	0	0	0	0	0	0	0	0	0
ENSRNOT00000078878	0	0	0	0	0	0	0	0	0	0	0	0
ENSRNOT00000078881	0	0	0	0	0	0	0	0	4.3511	0	0	0
ENSRNOT00000078882	0	0	0	0	0	0	0	0	0	0	0	0
ENSRNOT00000078895	38.9628	16.4817	12.0699	1.34428	3.75837	28.4549	0	2.00984	40.3335	7.02707	6.70197	12.1042
ENSRNOT00000078896	0	0	0	0	0	0	0	0	0	0	0	0
ENSRNOT00000078904	0	0	0	0	0	0	0	0	0	0	0	0
ENSRNOT00000078920	0	0	1.62027	0	1.71311	0	2.7769	1.54436	0	0	1.30898	0
ENSRNOT00000078922	0	0	0	0	0	0	0	0	0	0	0	1.97862
ENSRNOT00000078923	0	0	0	0	0	0	0	0	0	0	0	0
ENSRNOT00000078934	0	0	0	0	0	0	0	0	0	0	0	0
ENSRNOT00000078937	0	0	0	0	0	0	0	0	0	0	0	0
ENSRNOT00000078940	0	0	0	0	0	0	0	0	0	0	0	0
ENSRNOT00000078941	647.443	351.626	483.499	506.288	650.163	741.569	577.126	651.888	654.472	559.128	609.736	581.804
ENSRNOT00000078943	0	0	0	0	0	0	0	0	0	0	0	0
ENSRNOT00000078949	0	1.60629	0	1.71675	0	0	2.654	0	0	0	1.45751	0.855902
ENSRNOT00000078951	0	0	0	0	0	0	0	0	0	0	0	0
ENSRNOT00000078959	203.8	115.913	217.845	120.867	130.084	224.284	169.506	99.0085	358.644	131.429	241.566	210.632
ENSRNOT00000078973	0	0	0	0	0	0	0	0	0	0	0	0
ENSRNOT00000078974	0	0	0	0	0	0	0	0	0	0	0	0
ENSRNOT00000078976	0	0	1.65856	0	0	4.11217	0	1.68113	0	0	1.97507	0
ENSRNOT00000078981	0	0	0	0	0	0	0	0	0	0	0	0
ENSRNOT00000078988	0	0	0	0	0	0	0	0	0	0	0	0
ENSRNOT00000078995	0	0	0	0	0	0	0	0	0	0	0	0
ENSRNOT00000079007	0	0	0	0	0	0	0	0	0	0	0	0
ENSRNOT00000079009	0	0	0	0	0	0	0	0	0	0	0	0
ENSRNOT00000079012	0	0	0	0	0	0	0	0	0	0	0	0
ENSRNOT00000079022	0	0	0	0	0	0	0	0	0	0	0	0
ENSRNOT00000079039	0	0	0	0	0	0	0	0	0	0	0	0
ENSRNOT00000079045	0	0	0	0	0	0	0	0	0	0	0	0
ENSRNOT00000079050	0	0	0	0	0	0	0	0	0	0	0	0
ENSRNOT00000079060	0	0	0	0	0	0	0	0	0	0	0	0
ENSRNOT00000079070	0	0	0	0	0	0	0	0	0	0	0	0
ENSRNOT00000079081	36.5603	37.2445	18.9275	27.7016	25.4827	45.2231	33.981	33.3878	35.8027	31.4387	42.5731	31.1115
ENSRNOT00000079086	9.89994	0	0	0	0	0	0	0	0	0	0	0
ENSRNOT00000079101	0	0	0	0	0	0	0	0	0	0	0	0
ENSRNOT00000079102	3433.49	3657.44	2828.23	2109.41	3365.56	2997.01	2455.93	3016.33	2896.55	3372.69	3149.13	3319.57
ENSRNOT00000079103	0	0	0	0	0	0	0	0	0	0	0	0
ENSRNOT00000079104	0	0	0	0	0	0	0	0	0	0	0	0
ENSRNOT00000079112	0	0	0	0	0	0	0	0	0	0	0	0
ENSRNOT00000079123	0	0	0	0	0	0	0	0	0	0	0	0
ENSRNOT00000079124	0	0	0	0	0	0	0	0	0	0	0	0
ENSRNOT00000079131	0	0	0	0	0	0	0	0	0	0	0	0
ENSRNOT00000079135	0	0	0	0	0	0	0	0	0	0	0	0
ENSRNOT00000079142	0	0	0	0	0	0	0	0	0	0	0	0
ENSRNOT00000079143	0	0	0	0	0	0	0	0	0	0	0	0
ENSRNOT00000079148	1162.15	320.185	537.675	232.447	582.453	292.938	422.664	610.264	471.886	440.828	352.404	414.159
ENSRNOT00000079154	0	0	0	0	0	0	0	0	0	0	0	0
ENSRNOT00000079155	0	0	0	0	0	0	0	0	0	0	0	0
ENSRNOT00000079165	0	0	0	0	0	0	0	0	0	0	0	0
ENSRNOT00000079178	0	0	0	0	0	0	0	0	0	0	0	0
ENSRNOT00000079184	0	0	0	0	0	0	0	1.16489	0	0	0.000522	0
ENSRNOT00000079187	0	0	0	0	0.981757	0	0	0	0	0	0	0
ENSRNOT00000079204	0	0	0	0	0	0	0	0	0	0	0	0
ENSRNOT00000079208	65.6084	0.216174	23.1863	23.2165	113.708	28.8226	55.9268	31.0438	71.0294	11.2967	18.4469	36.9488
ENSRNOT00000079209	0	0	0	0	0	0	0	0	2.82614	1.38921	0	0
ENSRNOT00000079214	0	0	0	0	0	0	0	0	0	0	0	0
ENSRNOT00000079218	0	0	0	0	0	0	0	0	0	0.935621	0	0.927712
ENSRNOT00000079224	7.75236	1.06376	7.49922	2.01235	4.92998	4.29393	1.15165	7.91244	7.78393	7.92051	1.15027	0
ENSRNOT00000079226	0	0	0	0	0	0.87926	0	0	0	0	0	0
ENSRNOT00000079229	0	0	0	0	0	0	0	0	0	0	0	0
ENSRNOT00000079233	0	0	0	0	0	0	0	0	0	0	0	0
ENSRNOT00000079245	4.06574	9.14606	0	0	1.53469	1.47089	0	2.89746	1.47746	1.45144	0	1.56886
ENSRNOT00000079248	0	0	0	0	0	0	0	0	0	0	0	0
ENSRNOT00000079252	1.27064	0	0	0	0	0	0	0	0	0	0	0
ENSRNOT00000079265	0	0	0	0	0	0	0	0	0	0	0	0
ENSRNOT00000079272	5.26608	0	0	0	3.50253	0	0	0	0	0	0	0
ENSRNOT00000079282	122.608	114.932	138.821	173.491	187.528	114.415	218.194	194.733	145.675	202.122	159.666	161.685
ENSRNOT00000079296	0	0	0	0	0	0	0	0	0	0	0	0
ENSRNOT00000079302	0	0	0	0	0	0	0	0	0.550182	0	0	0
ENSRNOT00000079308	96.8627	7.21982	74.3282	10.6147	93.0741	20.0306	64.4255	88.1713	58.999	73.2269	32.3066	34.4526
ENSRNOT00000079309	1.3735	0	1.09759	3.55082	0	0	0	0	1.20382	0	0	0
ENSRNOT00000079313	0	0	0	0	0	0	0	0	0	0	0	0
ENSRNOT00000079320	29093.3	92853.2	60374.4	46502.4	48756.4	78691.4	44298.3	54443.3	63184.8	66940	56500.8	61971.4
ENSRNOT00000079323	0	0	0	0	0	0	0	0	0	0	0	0
ENSRNOT00000079330	0	0	0	0	0	0	0	0	0	0	0	0
ENSRNOT00000079354	0	0	0	0	0	0	0	0	0	0	0	0
ENSRNOT00000079357	0	0	0	0	0	0	0	0	0	0	0	0
ENSRNOT00000079361	0	0	0	0	0	0	0	0	0	0	0	0
ENSRNOT00000079369	0	0	0	0	0	0	0	0	0	0	0	0
ENSRNOT00000079370	0	0	0	0	0	0	0	0	0	0	0	0
ENSRNOT00000079374	0	0	0	0	0	0	0	1.55271	0	0	0	0
ENSRNOT00000079386	0	0	0	0	0	0	0	0	0	0	0	0
ENSRNOT00000079393	0	0	0	0	0	0	0	0	0	0	0	0
ENSRNOT00000079399	12.0172	6.33578	1.17563	5.53671	5.07064	0	2.49441	7.26988	1.19651	5.98041	1.21043	3.37196
ENSRNOT00000079403	18.913	48.0643	27.111	21.8026	25.7484	35.0474	27.2671	29.556	36.8638	44.139	47.9069	38.9757
ENSRNOT00000079406	0	0	0	0	0	0	0	0	0	0	0	0
ENSRNOT00000079409	0	0	0	0	0	0	0	0	0	0	0	0
ENSRNOT00000079421	0	0	0	0	0	0	0	0	0	0	0	0
ENSRNOT00000079422	0.227755	7.89945	0.879897	0	0	3.31234	0	0	5.1413	0	3.42154	4.80348
ENSRNOT00000079425	226.589	484.796	359.379	395.815	349.906	467.897	305.653	313.878	446.277	400.962	437.668	495.375
ENSRNOT00000079427	0	0	0	0	0	0	0	0	0	0	0	0
ENSRNOT00000079434	43.0369	40.9523	144.607	22.1239	58.2369	23.2694	24.8461	71.2527	59.4693	70.296	54.7351	50.9778
ENSRNOT00000079436	0	0	0	2.04278	0	0	0	0	1.91075	0	0	0
ENSRNOT00000079444	0	0	0	0	0	0	0	0	0	0	0	0
ENSRNOT00000079447	0	0	0	0	0	0	0	0	0	0	0	1.67741
ENSRNOT00000079451	0	0	0	0	0	0	0	0	0	0	0	0
ENSRNOT00000079457	0	0	0	0	0	0	0	0.424699	0	1.74181	0	0
ENSRNOT00000079460	3738.74	812.639	3353.8	1483.81	2929.84	1591.7	2236.95	2714.44	2303.1	2283.12	1554.29	2067.82
ENSRNOT00000079472	0	0	0	0	0	0	0	0	0	0	0	0
ENSRNOT00000079478	72.8009	20.9849	28.8925	15.3826	27.6884	20.3748	26.0506	32.8593	25.26	51.1439	26.842	25.3423
ENSRNOT00000079480	0	0	0	0	0	0	0	0	0	0	0	0
ENSRNOT00000079502	0	0	0	0	0	0	0	0	0	0	0	0
ENSRNOT00000079507	0	0	0	0	0	0	0	0	0	0	0	0
ENSRNOT00000079514	0	0	0	0	0	0	0	0	0	0	0	0
ENSRNOT00000079518	0	0	0	0	0	0	0	0	0	0	0	0
ENSRNOT00000079525	0	0.891897	0	0	0	0	0	0	0	0.931007	0	0
ENSRNOT00000079528	93.9964	60.8806	43.8643	34.4155	25.1345	59.5009	45.3007	30.6682	41.6712	61.296	42.743	44.572
ENSRNOT00000079534	0	0	0	0	0	0	0	0	0	0	0	0
ENSRNOT00000079537	0	0	0	0	0	0	0	0	0	0	0	0
ENSRNOT00000079538	0	13.1302	0	7.83913	0	2.67591	5.25652	0	0	5.18053	0.901672	0
ENSRNOT00000079540	113.441	144.85	115.893	185.929	178.009	186.309	176.647	158.879	208.336	207.752	178.798	199.701
ENSRNOT00000079542	0	0	0	0	0	0	0	0	0	0	0	0
ENSRNOT00000079555	0	0	0	0	0	1.21007	0	0	0	0	0	0
ENSRNOT00000079557	0	0	0	0	0	0	0	0	0	0	0	0
ENSRNOT00000079564	0	0	0	0	0	0	0	0	0	0	0	0
ENSRNOT00000079570	0	0	0	0	0	0	0	0	0	0	0	0
ENSRNOT00000079578	0	8.97992	5.99355	1.51862	4.91965	2.83593	0	4.85843	6.37123	2.97589	8.074	6.17514
ENSRNOT00000079581	0	0	0	0	0	0	0	0	0	0	0	0
ENSRNOT00000079586	2.70025	1.61363	0	0	2.07844	0	0	0	3.64531	0	3.58933	1.62794
ENSRNOT00000079589	0	0	0	0	0	0	0	0	0	0	0	0
ENSRNOT00000079592	0	0	0	0	0	0	0	0	0	0	0	0
ENSRNOT00000079596	0	0	0	0	0	0	0	0	0	0	0	0
ENSRNOT00000079605	0	0	0	0	0	0	0	0	0	0	0	0
ENSRNOT00000079616	0	0	0	0	0.579112	0	0	0	0	0	0	0
ENSRNOT00000079620	0	0	0	0	0	0	0	0	0	0	0	0
ENSRNOT00000079623	0	0	0	0	0	0	0	0	0	0	0	0
ENSRNOT00000079627	0	0	0	0	0	0	0	0	0	0	6.9e-05	0
ENSRNOT00000079629	0	0	0.831772	0	0	0	0	0	0	0	1.91012	0
ENSRNOT00000079638	0	0	13.8354	0	24.9689	0	0	0	0	0	0	0
ENSRNOT00000079642	0	0	0	0	0	0	0	0	0	0	0	2.73687
ENSRNOT00000079647	0	0	0	0	0	0	0	0	0	0	0	0
ENSRNOT00000079649	1.25871	0	3.14889	1.33016	0.716064	0.726863	1.43069	0	2.78468	2.0274	0	0.695575
ENSRNOT00000079653	0	0	0	1.38552	1.82615	2.86749	0	0	0	1.51027	0	0
ENSRNOT00000079662	0	0	0	0	0	0	0	0	0	0	0	0
ENSRNOT00000079674	0	0	0	0	0	0	0	0	0.931978	0	0	0
ENSRNOT00000079681	0	0	0	0	0	0	0	0	0	0	0	0
ENSRNOT00000079686	0	1e-06	0	0	0	0	0	0	0	0	0	0
ENSRNOT00000079699	0	0	0	0	0	0	0	1.34888	0	0	0	0
ENSRNOT00000079701	0	1.14271	0	4.35231	0	3.50779	0	0	1.16787	3.39194	1.16106	0
ENSRNOT00000079705	0	0	0	0	0	0	0	0	0	0	0	0
ENSRNOT00000079713	0	0	0	0	0	0	0	0	0	0	0	0
ENSRNOT00000079714	0	0	0	0	0	0	0	0	0	0	0	0
ENSRNOT00000079720	0	12.5101	20.5848	30.5001	17.9672	19.8609	6.10003	5.59581	0	0	19.2415	17.7656
ENSRNOT00000079739	0.675268	0	0	1.08963	0	0.586909	3.3202	0	0.533179	0.503932	0	0.550991
ENSRNOT00000079740	12.1194	56.9818	14.4259	36.6231	33.3125	75.6614	24.4153	61.5016	24.4152	35.3537	34.089	25.6205
ENSRNOT00000079741	0	0	0	0	0	5.90351	0	0	3.73153	3.71047	0	3.7657
ENSRNOT00000079749	0	0	0	0	0	0	0	0	0	0	0	0
ENSRNOT00000079751	0	0	0	0	0	0	0	0	0	0	0	0
ENSRNOT00000079756	0.000291	0	3.82119	1.02977	0.374634	0.611049	0	1.91382	0.99537	0.979787	0	0
ENSRNOT00000079761	226.55	202.911	160.377	74.6585	143.127	154.359	93.1814	225.247	135.436	195.664	162.097	124.508
ENSRNOT00000079772	3.25461	0	0	0	0	0	0	0	0	0	0	1.87299
ENSRNOT00000079780	0	0	0	0	0	0	0	0	0	0	0	0
ENSRNOT00000079787	0	0	0	0	0	0	0	0	0	0	0	0
ENSRNOT00000079789	1.28401	0	0	0.918444	0	0.954788	0.084808	3.88975	0.631147	0	0	0.912307
ENSRNOT00000079790	294.833	56.2308	146.823	15.8527	137.277	52.346	126.816	110.975	184.104	122.535	62.1289	118.067
ENSRNOT00000079791	12.4671	17.4852	4.37032	10.2783	6.95131	17.1771	8.86395	12.2421	13.129	13.0168	9.91823	9.5024
ENSRNOT00000079800	21.6689	39.753	34.0781	44.8672	18.0975	58.2758	26.9151	17.0864	56.5867	51.1509	27.1564	33.4665
ENSRNOT00000079809	33.0179	86.0835	35.8938	78.6369	122.633	80.8198	64.5481	40.8438	41.7238	70.0084	60.4073	61.0891
ENSRNOT00000079814	0	0	1.48378	0	0	0	0	0	0	0	0	0
ENSRNOT00000079817	0	0	0	0	0	0	0	0	0	0	0	0
ENSRNOT00000079818	0	0	0	0	0	0	0	0	0	0	0	0
ENSRNOT00000079820	4.16261	14.8499	10.2631	1.18042	4.2465	9.02637	7.32056	18.8432	2.94598	15.318	16.4675	6.94139
ENSRNOT00000079821	0	0	0	0	0	0	0	0	0	0	0	0
ENSRNOT00000079825	0	1.43894	0	0	0	0	0	0	0	0	0	0
ENSRNOT00000079827	26.7078	6.41693	14.87	15.5543	16.46	22.9159	11.3008	16.8279	7.49895	10.8825	15.1812	18.2357
ENSRNOT00000079837	12.9522	0	0	0	10.1344	0	0	3.41994	5.0438	8.58309	0	0
ENSRNOT00000079840	8.86502	0	0	0	0	1.27985	0	0	2.53154	5.02357	1.27624	1.30484
ENSRNOT00000079852	0	0	0	1.16381	0	1.25484	0	0	0	0	0	0
ENSRNOT00000079857	0	0	0	0	0	0	0	0	0	1.58069	0	0
ENSRNOT00000079859	0	0	0	0	0	0	0	0	0	0	0	0
ENSRNOT00000079867	56.2027	18.2746	21.0351	20.917	27.1496	23.4153	24.0579	26.1544	24.2912	14.4088	12.7541	14.2572
ENSRNOT00000079870	0	0	0	0	0	0	0	0	0	0	0	0
ENSRNOT00000079871	0	1.47261	0	0	0	0	0	0	0	0	0	0
ENSRNOT00000079876	10.6122	7.67437	6.93439	2.62572	2.01147	11.4777	7.18945	22.1929	13.6619	7.56453	2.94403	2.85223
ENSRNOT00000079877	0	0	0	0	0	0	0	2.45888	0	0	2.40549	0
ENSRNOT00000079885	62.2254	65.128	82.9582	49.842	76.9238	73.3945	57.507	55.6962	95.5212	86.2277	70.3229	77.3208
ENSRNOT00000079890	0	0	0	0	0	0	0	0	0	0	0	0
ENSRNOT00000079892	0	0	0	0	0	0	0	0	0	0	0	0
ENSRNOT00000079896	0	0	0	0	0	0	0	0	0	1.72907	0	0
ENSRNOT00000079901	4.89533	2.04471	1.98713	0	2.16163	0	4.28021	1e-06	2.07544	3.91896	0	0
ENSRNOT00000079902	0	0	0	0	0	0	0	0	0	0	0	0
ENSRNOT00000079904	87.1478	220.836	153.067	185.54	160.67	246.818	187.583	177.808	194.316	193.267	212.827	212.94
ENSRNOT00000079908	4.001	0	0	0	0	0	0	0	2.25235	2.19067	2.16395	0
ENSRNOT00000079910	0	0	0	0	0	0	0	0	0	0	0	0
ENSRNOT00000079914	6.51345	10.9277	14.6301	2.27611	4.18257	5.96386	6.36916	11.1505	13.0394	15.3574	2.44022	14.2322
ENSRNOT00000079915	0	2.66718	0	0.922303	0	0	0	0	0	0	0	0
ENSRNOT00000079928	0	0	0	0	0	0	0	0	0	0	0	0
ENSRNOT00000079931	5.71187	0.981445	1.04968	2.73072	2.08934	3.87854	2.92794	0.97528	2.90991	1.79267	4.95215	1.74577
ENSRNOT00000079932	0	0	0	0	0	0	0	0	0	0	0	0
ENSRNOT00000079936	0	0	0	0	0	0	0	0	0	0	0	0
ENSRNOT00000079937	1.73731	3.79611	0	0	1.14956	0	0	0	25.0619	14.4358	5.99595	0
ENSRNOT00000079939	0	0	0	0	0	0	0	0	0	0	0	0
ENSRNOT00000079944	0	0	0	0	0	0	0	0	0	0	0	0
ENSRNOT00000079964	0	0.276638	0	0	1.27749	0.066764	0	1.17858	0	9.26659	0.096433	0
ENSRNOT00000079968	0	0	0	0	0	0	0	0	0	0	0	0
ENSRNOT00000079971	0	0	0	0	0	0	0	0	0	0	0	0
ENSRNOT00000079972	0	0	0	0	0	0	0	0	0	0	0	0
ENSRNOT00000079973	0	0	0	0	0	0	0	0	0	0	0	0
ENSRNOT00000079974	16.6863	23.2526	11.022	3.57668	15.7605	20.0001	28.9902	20.1384	23.1096	16.0257	16.5834	21.0779
ENSRNOT00000079979	0	0	0	0	0	0	0	0	0	0	0	0
ENSRNOT00000079983	0	6.64046	0.000523	1.2e-05	0	3.40385	1e-05	0	0	6.21448	1.36857	6.39994
ENSRNOT00000079997	0	0	0	0	0	0	0	2.31798	0	0	0	0
ENSRNOT00000080003	0	0	0	0	0	0	0	0	0	0	0	0
ENSRNOT00000080004	0	0	0	0	0	0	0	0	0	0	0	0
ENSRNOT00000080005	18.4027	1.21206	2.63335	0	3.90633	6.50407	0	7.59758	12.947	0	3.50988	0
ENSRNOT00000080008	0	0	0	0	0	0	0	0	0	0	0	0
ENSRNOT00000080015	10.7547	34.1227	19.5046	14.2671	16.9023	32.9072	15.4018	16.5683	22.8043	18.3314	23.8946	10.4027
ENSRNOT00000080020	0	0	0	0	0	0	0	0	0	0	0	0
ENSRNOT00000080022	0	0	0	0	0	0	0	0	0	0	0	0
ENSRNOT00000080023	0	0	0	0	0	0	0	0	0	0	0	0
ENSRNOT00000080025	0	0	0	0	0	0	0	0	0	0	0	2.32361
ENSRNOT00000080029	0	0	0	0	0	0	0	0	0	0	0	0
ENSRNOT00000080044	0	0	0	0	0	0	0	0	0	0	0	0
ENSRNOT00000080050	0	0	0	0	0	0	0	0	0	0	0	0
ENSRNOT00000080055	0	0	0	0	0	0	0	0	0	0	0	0
ENSRNOT00000080057	0	0	0	0	0	0	0	0	0	0	0	0
ENSRNOT00000080064	0	2.66935	1.30491	2.31268	1.36959	0	7.24444	13.5801	3.72004	0	1.32719	0.001755
ENSRNOT00000080067	0	0	0	0	1.30227	0	0	0	0	0	0	0
ENSRNOT00000080070	0	0	0	0	0	0	0	0	0	0	0	0
ENSRNOT00000080074	0	0	0	0	0	0	0	0	0	0	0	0
ENSRNOT00000080092	0	0	0	0	0	0	0	0	0	0	0	0
ENSRNOT00000080093	0	0	0	0	0	0	0	0	0	0	0	0
ENSRNOT00000080098	0	0	0	0	0	0	0	0	0	0	0	0
ENSRNOT00000080102	12.1006	4.59157	0	0	1.27773	3.74789	0	1.20368	3.29164	0.05303	4.45086	0
ENSRNOT00000080111	2.42453	4.81515	0	1.15453	0	5.04919	5.60766	0	1.3092	3.806	5.15688	12.2819
ENSRNOT00000080120	33.4331	21.0635	11.8021	0	11.2224	13.0535	9.87202	9.90273	9.13082	11.1102	23.0539	11.1267
ENSRNOT00000080127	0	0	0	0	0	0	0	0	0	0	0	0
ENSRNOT00000080128	0	0	0	0	0	0	0	0	0	0	0	0
ENSRNOT00000080156	0	0	0	0	0	0	0	0	0	0	0	0
ENSRNOT00000080169	0	0	0	0	0	0	0	0	0	0	0	0
ENSRNOT00000080182	0	0	0	0	0	0	0	0	0	0	0	0
ENSRNOT00000080184	0	0	0	0	0	0	0	0	0	0	0	0
ENSRNOT00000080186	1.1662	2.06272	0	8.15264	6.5166	4.30845	3.00204	2.98834	0	3.23709	8.36196	4.16063
ENSRNOT00000080194	0.612584	3.49492	0	0.070007	0	16.5012	3.69897	0	3.16686	1.57007	4.9105	0.837585
ENSRNOT00000080200	0	0	0	0	0	0	0	0	0	0	0	0
ENSRNOT00000080205	0	0	0	0	0	0	0	0	0	0	0	0
ENSRNOT00000080210	33.1503	20.2789	28.1387	12.3521	11.8648	25.5008	19.9191	13.1071	40.6923	33.7143	33.1716	30.2069
ENSRNOT00000080219	0	0	0	0.705603	0	0.115593	0.052981	0.00146	0.333312	5e-06	0	0
ENSRNOT00000080224	5.09621	0	1.16853	0	0	4e-06	0	0	1.7e-05	2.2276	0	0
ENSRNOT00000080238	0	1.72702	0	0	0	0	0	0	3.56607	0	0	0
ENSRNOT00000080240	0	0	0	0	0	0	0	0	0	0	0	0
ENSRNOT00000080245	0.916491	1.21065	0	1.16868	0	0	0	0	0	1.16992	0	0
ENSRNOT00000080248	0	0	0.974849	0	0	0.9928	0	0	0	0	0	0
ENSRNOT00000080258	0	0	0	0	0	0	0	0	0	0	0	0
ENSRNOT00000080259	0	2.60522	0	1.40376	1.59858	0	3.02066	0	4.41917	22.8558	2.90442	0
ENSRNOT00000080263	0	0	0	0	0	0	0	0	0	0	0	0
ENSRNOT00000080264	0	0	0	0	0	0	0	0	0	0	0	0
ENSRNOT00000080265	0	0	0	0	0	0	0	0	0	0	0	0
ENSRNOT00000080272	0	0	0	0	0	0	0	0	0	0	0	0
ENSRNOT00000080276	65.9904	18.2184	36.8103	14.2117	50.8151	18.789	42.6715	56.0245	41.1938	31.3667	21.5198	21.6096
ENSRNOT00000080278	0	0	0	0	0	0	0	0	0	0	0	0
ENSRNOT00000080286	0	0	0	0	0	0	0	0	0	0	0	0
ENSRNOT00000080296	0	2.41349	0	1.1341	0	0	2.54392	1.29618	4.85532	3.63168	1.19223	3.44859
ENSRNOT00000080300	0	0	0	0	0	0	0	0	0	0	0	0
ENSRNOT00000080316	0.524063	0	0.970167	0	0	0	0	0	0	0	0	0
ENSRNOT00000080318	0	0	0	0	0	0	0	0	0	0.074492	0	0
ENSRNOT00000080321	0	0	0	0	0	0	0	0	0	0	0	0
ENSRNOT00000080327	0	0	0	0	0	0	0	0	0	0	0	0
ENSRNOT00000080332	11.9778	48.9573	36.6503	57.7251	26.9691	74.1466	36.0949	31.9686	66.3273	104.862	76.1534	37.6762
ENSRNOT00000080336	0	0	0	0	0	0	0	0	0	0	0	0
ENSRNOT00000080347	0	0	0	0	0	0	0	0	0	0	0	0
ENSRNOT00000080349	0	0	0	1.50844	0	0	0	0	0	0	0	0
ENSRNOT00000080353	12.5214	5.31886	9.88371	1.70777	6.85047	10.1745	6.65179	10.8235	4.47005	8.49452	8.10351	4.37815
ENSRNOT00000080355	0	0	0.296071	0	0	0	1.51535	1.15146	0.008267	0	0	0
ENSRNOT00000080356	0	0	0	0	0	0	0	0	0	0	0	0
ENSRNOT00000080357	8.06405	0	7.1101	0	0	0	0	0	0	0	0	0
ENSRNOT00000080361	0	0	0	0	0	0	0	0	0	0	0	0
ENSRNOT00000080367	0	0	0	0	0	0	0	0	0	0	0	0
ENSRNOT00000080368	0	0	0	0	0	0	0	0	0	0	0	0
ENSRNOT00000080373	0	0	0	0	0	0	0	0	0	0	0	0
ENSRNOT00000080377	0	0	0	0	0	0	0	0	0	0	0	0
ENSRNOT00000080380	3.57535	0	4.14584	0	0	0	0	0	5.24371	0	0	5.14893
ENSRNOT00000080383	7.97603	0	0	0	0	0	0	0	0	0	0	0
ENSRNOT00000080385	0	0	1.10664	0	0	0	0	0	0	0	0	0
ENSRNOT00000080393	0	0	0	0	0	0	0	0	0	0	0	0
ENSRNOT00000080394	0	0	0	0	0	0	0	0	0	0	0	0
ENSRNOT00000080396	0	0	0	0	0	0	0	0	0	0	0	0
ENSRNOT00000080398	0	0.078224	0	0.007459	0.948742	0	0	0	0	7.9e-05	0	0
ENSRNOT00000080399	21.0044	9.82446	3.02754	0	3.04291	8.27481	0	0	10.6291	5.80647	3.14232	19.063
ENSRNOT00000080401	57.9592	10.5513	59.4374	4.60291	56.2707	18.9954	65.9274	54.4796	110.551	60.1341	24.2712	32.2117
ENSRNOT00000080405	68.7067	42.5112	39.6552	56.4658	48.6123	40.3485	32.6602	37.4634	48.8446	33.948	65.6381	59.6115
ENSRNOT00000080408	0	0	0	0	0	0	0	0	0	0	0	0
ENSRNOT00000080420	0	0	0	0	0	0	0	0	0	0	0	0
ENSRNOT00000080427	0	0	0	0	0	0	0	0	0	0	0	0
ENSRNOT00000080435	0	0	0	0	0	0	0	0	0	0	0	0
ENSRNOT00000080436	0	0	0	0	0	0	0	0	0	0	0	0
ENSRNOT00000080438	0	0	0	0	0	0	0	0	0	0	0	0
ENSRNOT00000080439	0	0	0	0	0	0	0	0	0	0	0	0
ENSRNOT00000080447	0	0	0	0	0	0	0	0	0	0	0	0
ENSRNOT00000080450	0	0	0	0	0	0	0	0	0	0	0	0
ENSRNOT00000080451	0	0	0	0	0	0	0	0	0	0	0	0
ENSRNOT00000080454	0	0	0	0	0.096986	0	0	0	0	0	0	0
ENSRNOT00000080459	10.9011	24.8064	23.4735	48.807	26.1465	25.7314	37.3861	58.6853	42.1596	47.1462	58.4248	53.3664
ENSRNOT00000080464	72.7594	166.924	131.453	59.5651	130.541	140.404	143.854	186.807	208.549	177.129	153.172	157.077
ENSRNOT00000080468	0.967659	0.453514	0	0	0	0	0	0	0	0	0	0.739583
ENSRNOT00000080473	0	0	0	0	0	0	0	0	0	0	0	0
ENSRNOT00000080477	0	0	0	0	0	0	0	0	0	0	0	0
ENSRNOT00000080480	0	0	0	0	0	0	0	0	0	0	0	0
ENSRNOT00000080484	0	0	0	0	0	0	0	0	0	0	0	0
ENSRNOT00000080488	0	0	0	0	0	0	0	0	0	0	0	0
ENSRNOT00000080500	0	0	0	5.17801	0	1.87071	1.94175	0	0	5.66395	0	1.68145
ENSRNOT00000080510	6.93313	1.1008	2.16974	4.6322	1.19735	6.70335	1.15211	1.1317	6.87376	1.11739	0	0
ENSRNOT00000080518	0	0	0	0	0	0	0	0	0	0	0	0
ENSRNOT00000080531	271.634	96.5596	159.571	149.09	207.774	125.373	169.334	197.356	199.184	238.991	165.646	163.791
ENSRNOT00000080532	9.51182	52.1539	12.9739	140.04	76.455	25.5407	16.7576	27.0482	19.5323	35.9146	43.3554	70.8299
ENSRNOT00000080542	0	0	0	0	0	0	0	0	0	0	0	0
ENSRNOT00000080547	0	0	0	0	0	0	0	0	0	0	0	0
ENSRNOT00000080548	0	0	0.001016	2.51243	1.31645	0	2.55549	4.12988	4.02988	2.94843	1.34162	1.2984
ENSRNOT00000080549	0	0	0	0	0	0	0	0	0	0	0	0
ENSRNOT00000080552	0	0	0	0	0	0	0	0	0	0	0	0
ENSRNOT00000080553	0	0	0	0	0	0	0	0	0	0	0	0
ENSRNOT00000080560	20.8888	0	2.63438	1.25113	13.9185	6.61263	16.6347	24.4026	11.5541	20.6551	13.7542	0
ENSRNOT00000080563	0	0	0	0	0	0	0	0	0	0	0	0
ENSRNOT00000080564	0	0	0	0	0	0	0	0	0	0	0	0
ENSRNOT00000080565	0	0	0	0	0	0	0	0	0	0	0	0
ENSRNOT00000080572	1.17469	6.81729	1.04869	0	3.34249	9.60903	6.88121	4.41868	3.59663	7.94639	10.9318	7.11158
ENSRNOT00000080573	0	0	0	0	0	0	0	0	0	0	0	0
ENSRNOT00000080586	0	0	0	0.896977	0	0	0	0.7848	0.882583	0	0.91928	0
ENSRNOT00000080587	0	0	0	1.31205	0	0	0	0	0	0	0	0
ENSRNOT00000080596	0	0	0	0	0	0	0	0	0	0	0	0
ENSRNOT00000080597	0	0	0	0	0	0	0	0	0	0	0	0
ENSRNOT00000080603	0	0	0	0	0	0	0	0	0	0	0	0
ENSRNOT00000080610	2.68429	9.37939	6.83379	12.5872	2.03445	14.4989	11.6413	10.8626	33.2171	27.7732	14.9326	8.87278
ENSRNOT00000080614	0	1.84409	0	0	0	0	0	0.598747	0	0	0	0.000254
ENSRNOT00000080619	0	0	0	0	0	0	0	0	0	0	0	0
ENSRNOT00000080624	77.6677	85.7662	89.63	119.019	95.6893	89.8227	134.164	88.5123	120.827	119.021	132.204	138.997
ENSRNOT00000080625	164.435	129.336	121.753	53.063	76.4861	115.984	60.3074	105.979	87.5796	135.188	118.35	117.883
ENSRNOT00000080627	0	0	0	0	0	0	0	0	0	0	0	0
ENSRNOT00000080629	23.3468	13.5508	11.3405	15.1117	28.5294	15.6406	29.7236	7.24403	14.6135	21.4111	7.06264	9.41316
ENSRNOT00000080633	0	0	0	0	0	0	0	0	0	0	0	0
ENSRNOT00000080643	0	0	0	1.57053	0	0	0	0.780711	0	0	0.028142	0
ENSRNOT00000080648	0	0	0	0	0	0	0	0	0	0	0	0
ENSRNOT00000080652	0	1.57165	3.68228	4.90429	6.10122	0	0	1.93801	9.09927	7.00373	3.28138	1.68242
ENSRNOT00000080667	0	0	0	0	0	0	0	0	0	0	0	0
ENSRNOT00000080668	2.78078	1.34663	4.65632	1.22731	0	0	3.09494	3.20301	2.85518	1.38169	2.65754	1.28439
ENSRNOT00000080679	0	0	0	0	0	0	0	0	0	0	0	0
ENSRNOT00000080687	0	0	0	0	0	0	0	0	0	0	0	0
ENSRNOT00000080690	0	0	0	0	0	0	0	0	0	0	0	0
ENSRNOT00000080698	0	0	0	0	0	0	0	0	0	0	0	0
ENSRNOT00000080704	0	0	0	0	0	0	0	0	0	0	0	0
ENSRNOT00000080709	0	0	0	0	0	0	0	0	0	0	0	0
ENSRNOT00000080711	0	0	0	0	0	0	0	0	0	0	0	0
ENSRNOT00000080713	336.401	148.015	304.21	103.947	228.221	177.814	183.098	311.388	319.941	423.12	135.92	232.428
ENSRNOT00000080716	0	0	0	0	0	0	0	0	0	0	0	0
ENSRNOT00000080719	0	0	0	0	0	0	0	0	0	0	0	0
ENSRNOT00000080722	0	0	0	0	0	0	0	0	0	0	0	0
ENSRNOT00000080723	0	0	0	0	0	0	0	0	0	0	0	0
ENSRNOT00000080725	0	0	0	0	0	0	0	0	0	0	0	0
ENSRNOT00000080733	13.2242	0	0	0	3.5547	0	4.6002	0	2.71391	1.32475	0	0
ENSRNOT00000080737	0	0	0	0	0	0	0	0	0	0	0	0
ENSRNOT00000080743	0	0	0	0	0	0	0	0	0	0	0	0
ENSRNOT00000080749	0	0	0	0	0	0	0	0	0	0	0	0
ENSRNOT00000080761	0	0	0	0	0	0	0	0	0	0	0	0
ENSRNOT00000080762	0	0	0	0	0	0	0	0	0	0	1.22965	0
ENSRNOT00000080771	35.5458	17.0994	7.0431	25.3309	20.1064	7.17594	2.50267	2.39478	1e-06	13.1952	29.2066	23.2759
ENSRNOT00000080782	0	0	0	0	0	0	0	0	0	0	0	0
ENSRNOT00000080790	0	0	0	0	0	0	0	0	0	0	0	0
ENSRNOT00000080792	0	0	0	0	0	0	0	0	0	0	0	0
ENSRNOT00000080798	0	0	0	0	0	0	0	0	0	0	0	0
ENSRNOT00000080805	0	0	0	0	0.514021	0	0	0	0	0	0	0
ENSRNOT00000080819	0	0	0	0	0	0	0	0	0	0	0	0
ENSRNOT00000080821	0	0	0	0	0	0	0	0	0	0	0	0
ENSRNOT00000080825	0	1.976	1.66311	2.5283	1.22544	0.832597	1.50138	1.17278	0	1.40542	0.870767	3.58782
ENSRNOT00000080830	0	0	0	0	0	0	0	0	0	0	0	0
ENSRNOT00000080831	21.6544	12.0073	14.8197	12.7794	15.8201	27.3049	11.2333	8.28047	10.9679	26.8483	32.9763	18.5343
ENSRNOT00000080833	2.37405	0	0	0	0	0.944077	0	0	0	0	0	0
ENSRNOT00000080837	0	0	0	0	0	0	0	0	0	0	0	0
ENSRNOT00000080838	0	0	0	0	0	0	0	0	0	0	0	0
ENSRNOT00000080845	0	0	0	0	0	0	0	0	0	0	0	0
ENSRNOT00000080849	0	0	0	0	0	0	0	0	0	0	0	0
ENSRNOT00000080850	0	0	0	0	0	1.24743	0	0	0	1.17615	0	0
ENSRNOT00000080852	0	0	0	0	0	0	0	0	0	0	0	0
ENSRNOT00000080854	0	0	0	0	0	0	0	0	0	0	0	0
ENSRNOT00000080862	0	0	0	0	0	0	0	0	0	0	0	0
ENSRNOT00000080867	9.46825	10.2717	17.2355	7.12372	24.4145	13.8109	8.63126	13.2454	17.3168	12.249	9.9786	7.38953
ENSRNOT00000080869	0	0	0	0	0	0	1.72818	0	1.7688	0	0	0
ENSRNOT00000080870	0	1.09114	0	1.01679	0	1.06476	2.32566	0	1.98854	1.0915	0	0.528123
ENSRNOT00000080876	0.018188	0	0	0	0	2e-06	1.5e-05	0	6e-06	0.224916	1.7e-05	0
ENSRNOT00000080877	4.93464	14.8354	2.37275	1.78376	4.81323	7.29329	8.8428	0.815109	13.0521	2.96228	10.9721	4.57623
ENSRNOT00000080878	0	0	0	0	0	0	0	0	0	0	0	0
ENSRNOT00000080879	0	0	0	0	1.22683	0	0	1.17692	0	1.07643	1.12958	1.11808
ENSRNOT00000080883	31.2831	12.2051	27.5354	9.92386	29.9837	10.2023	15.1295	12.2186	18.1255	25.6053	13.3196	13.9717
ENSRNOT00000080884	5.7624	2.58045	7.26311	4.76644	8.9266	9.22318	9.63387	7.36383	5.32532	9.82944	8.58951	4.21566
ENSRNOT00000080895	0	0	0	0	0	0	0	0	0	0	0	0
ENSRNOT00000080908	0	0	0	0	0	0	0	0	0	0	0	0
ENSRNOT00000080915	0	0	0	0	0	0	0	0	0	0	0	0
ENSRNOT00000080918	298.151	154.928	190.754	170.296	199.562	213.464	197.841	153.977	220.182	228.816	233.146	194.029
ENSRNOT00000080920	0	0	0	0	0	0	0	0	0	0	0	0
ENSRNOT00000080921	0	0	0	0	0	0	0	0	0	0	0	0
ENSRNOT00000080924	0	0	0	0	0	0	0	0	0	0	0	0
ENSRNOT00000080938	19.7304	26.0052	36.0379	12.5119	21.0741	26.144	35.5301	17.5624	24.852	26.8159	12.0856	18.6794
ENSRNOT00000080946	0	0	0	0	0	0	0	0	0	0	0	0
ENSRNOT00000080979	243.179	220.588	317.925	213.591	300.347	246.181	362.785	330.83	356.811	310.593	351.17	317.074
ENSRNOT00000080985	0	0	0	0	0	0	0	0	0	0	0	0
ENSRNOT00000080989	0	0	0	0	0	0	0	0	0	0	0	0
ENSRNOT00000080991	0	0	0	0	0	0	0	0	0	0	0	0
ENSRNOT00000081006	0	0	0	0	0	0	0	0	0	0	0	0
ENSRNOT00000081010	0	0	0	0	0	0	0	0	0	0	0	0
ENSRNOT00000081011	0	0	0	0	0	0	0	0	0	0	0	0
ENSRNOT00000081013	0	0	0	0	0	0	0	0	0	0	0	0
ENSRNOT00000081031	1.68365	1.77754	0	0	0	1.65064	0	0	1.64152	4.73918	0	3.27757
ENSRNOT00000081034	0	0	0	0	0	0	0	0	0	0	0	0
ENSRNOT00000081035	4.69811	0	0	0	0	0	0	0	0	0	0	0
ENSRNOT00000081040	4.19339	1.63862	1.62766	3.02182	0	3.41269	5.17891	0	3.35101	4.22484	1.68987	5.68264
ENSRNOT00000081041	12.3018	52.9819	28.391	22.6503	23.2602	45.0526	17.6864	22.0808	21.831	30.5802	51.3078	31.3362
ENSRNOT00000081043	0	0	0	0	0	0	0	0	0	0	0	0
ENSRNOT00000081046	9.48528	0	0	0	0	0	0	0	0	0	0	0
ENSRNOT00000081048	61.4349	64.0059	68.1465	21.2259	46.3189	62.9472	57.2723	47.1307	114.177	65.6108	40.1769	71.4944
ENSRNOT00000081049	0	0	0	0	0	0	0	0	0	0	0	0
ENSRNOT00000081055	0	0	0	0	0	0	0.6366	0.63093	0	0	0	0
ENSRNOT00000081057	0	0	0	0	0	0	0	0	0	0	0	0
ENSRNOT00000081059	0	0	0	0	0	0	0	0	0	0	0	0
ENSRNOT00000081060	0	0	0	0	0	0	0	0	0	0	0	0
ENSRNOT00000081064	0	0	0	0	0	0	0	0	0	0	0	0
ENSRNOT00000081065	0	0	0	0	0	0	0	0	0	0	0	0
ENSRNOT00000081086	0	0	0	0	0	0	0	0	0	0	0	0
ENSRNOT00000081094	0	0	0	0	0	0	0	0	0	0	0	0
ENSRNOT00000081097	0	0	0	0	0	0	0	0	0	0	0	0
ENSRNOT00000081103	0	0	0	0	0	0	0	0	0	0	0	0
ENSRNOT00000081111	0	0	0	0	0	0	0	0	0	0	0	0
ENSRNOT00000081115	2.21731	23.2508	11.6373	16.5566	5.47899	10.6864	5.65805	10.3185	19.1183	23.0175	23.9485	17.676
ENSRNOT00000081118	0	0	0	0	0	0	0	0	0	0	0	0
ENSRNOT00000081122	0	0	0	0	0	0	0	0	0	0	0	0
ENSRNOT00000081126	0	0	1.47493	0	0	0	0	0	0	0	0	0
ENSRNOT00000081129	0	0	0	0	0	0	0	0	0	0	0	0
ENSRNOT00000081132	0	0	0	0	0	0	0	0	0	0	0	0
ENSRNOT00000081142	0	0	0	0	0	0	0	0	0	0	0	0
ENSRNOT00000081148	0	0	0	0	0	0	0	0	0	0	0	0
ENSRNOT00000081151	0	1.98485	0.838938	0.925078	0.867747	0	0	2.43128	0	0.929364	0.982351	0
ENSRNOT00000081155	0	0	0	0	0	0	0	0	0	0	0	0
ENSRNOT00000081158	8.73954	13.9403	8.16588	7.66382	2.50934	14.4292	4.95233	4.87013	11.69	3.90475	2.61014	13.0222
ENSRNOT00000081159	84.1369	40.6767	55.8333	59.9882	68.9345	52.5516	59.7633	95.7065	67.1577	71.4858	74.1747	86.1954
ENSRNOT00000081164	0	0	0	0	0	0	0	0	0	0	0	3.71358
ENSRNOT00000081168	0	0	0	0	0	0	0	0	0	0	0	0
ENSRNOT00000081169	40.7207	272.822	215.467	408.227	281.591	428.06	349.161	317.762	382.302	455.991	422.409	411.544
ENSRNOT00000081174	0.198181	4.66952	1e-06	1.55322	9.72588	1.51169	1.50046	0	14.2063	3.23137	0	10.4815
ENSRNOT00000081182	0	0	0	0	0	0	0	0	0	1.62626	0	0
ENSRNOT00000081184	0	0	0	0	0	0	0	0	0	0	0	0
ENSRNOT00000081199	0	0	0.763366	0	0	0.726993	0.787212	0.775165	0	0	0	0.714843
ENSRNOT00000081200	0	0	0	0	0	0.642947	2.62385	0	0	0	0	0
ENSRNOT00000081210	0	0	0	0	0	0	0	0	0	0	0	0
ENSRNOT00000081218	0	0	0	0	0	0	0	0	0	0	0	0.000399
ENSRNOT00000081221	0	0	0	0	0	0	0.948529	0	0	0	0	0
ENSRNOT00000081222	107.246	91.2876	90.5594	101.015	115.919	116.511	113.434	93.2399	106.3	119.467	94.1983	141.349
ENSRNOT00000081228	0	0	0	0	0	0	0	0	0	0	0	0
ENSRNOT00000081257	0	0	0	0	0	0	0	0	0	0	0	0
ENSRNOT00000081258	0	0	0	0	0	0	0	0	0	0	0	0
ENSRNOT00000081262	0	0	0	0	0	0	0	0	0	0	0	0
ENSRNOT00000081263	0	0.553004	1.56826	0	0	4.82248	3.4869	0	0	0	1.20821	0.266141
ENSRNOT00000081264	32.1421	0.021731	0.880773	9.8e-05	0	0.276704	0	21.4725	17.0477	0	8.93503	3.06874
ENSRNOT00000081267	0	0	0	0	0	0	0	0	0	0	0	0
ENSRNOT00000081275	0	0	0	0	1.71976	0	0	0	1.86664	0	0	0
ENSRNOT00000081284	0	7.40627	0	0	0	0	0	0	0	0	0	0
ENSRNOT00000081289	0	0	0	1.99981	5.94039	4.30701	2.06834	3.90618	2.07227	0	0	0
ENSRNOT00000081300	0	0	0	0	0	0	0	0	0	0	0	0
ENSRNOT00000081303	0	0	0	0	0	0	0	0	0	0	0	0
ENSRNOT00000081306	0	0.982819	0	0	0	0	0.853241	0	1.85139	6.58018	0.967609	0
ENSRNOT00000081316	47.8504	71.5194	66.3016	77.0089	90.6279	162.612	96.4698	86.6342	102.08	112.158	84.8905	132.187
ENSRNOT00000081317	0	0	0	0	0	0	0	0	0	0	0	0
ENSRNOT00000081319	0	0	0	0	0	0	0	0	0	0	0	0
ENSRNOT00000081320	0	0	0	0	0	0	0	0	0	0	0	0
ENSRNOT00000081325	0	0	0	0	0	0	0	0	0	0	0	0
ENSRNOT00000081329	1.37114	2.37504	11.5487	4.26857	8.38793	11.8854	2.55086	2.59354	3.83278	7.59542	7.08296	6.74318
ENSRNOT00000081330	0	0	4.15228	0.973308	2.29325	2.90482	0.989516	1.05653	1.01223	0.988075	0	0.957065
ENSRNOT00000081332	0	0	0	0	0	0	0	0	0	0	0	0
ENSRNOT00000081334	0	0	0	0	0	0	0	0	0	0	0	0
ENSRNOT00000081349	0	0	0	0	0	0	0	0	0	0	0	0
ENSRNOT00000081365	0	0	0	2.00951	0	4.88521	0	0	0	1.94955	0	0
ENSRNOT00000081367	0	0	0	0	0	0	0	0	0	0	0	0
ENSRNOT00000081372	0	8.35506	9.31606	7.9399	8.58365	0	0	18.1797	0	8.00411	0	0
ENSRNOT00000081379	0	1.4983	0	0	0	2.89504	0	2.66784	0	1.43377	0	0
ENSRNOT00000081380	0	0	1.76086	0	0	0	0	0	0	0	0	0
ENSRNOT00000081388	0	0	0	0	0	0	0	0	0	0	0	0
ENSRNOT00000081396	0	0	1.9964	0	0	0	5e-06	1.03992	1.05602	7.60248	0	3.25272
ENSRNOT00000081397	0	0.926186	0	0	0	0	0	0	0	0	1.01308	0
ENSRNOT00000081398	0	0	1.76344	0	0	0	0	0	0	1.571	0	0
ENSRNOT00000081402	0	0	0	0	0	0	0	0	0	0	0	0
ENSRNOT00000081410	0	0	0	0	0	0	0	0	0	0	0	0
ENSRNOT00000081411	0	0	0	0	0	0	0	0	0	0	0	0
ENSRNOT00000081412	0	0	0	0	0	0	0	0	0	0	0	0
ENSRNOT00000081418	7.46462	15.6636	10.4273	10.7181	10.3266	17.9528	12.0863	15.494	21.1653	21.3531	21.813	11.648
ENSRNOT00000081420	0	0	0	0	0	0	0	0	0	0	0	0
ENSRNOT00000081422	0	0	0	0	0	0	0	0	0	0	0	0
ENSRNOT00000081435	0	0	0	0	0	0	0	0	0	0	0	0
ENSRNOT00000081442	0	0	0	0.725663	0	0	0	0	1.51848	0	0	0
ENSRNOT00000081446	0	0	0	0	0	0	0	0	1.20503	0	0	0
ENSRNOT00000081448	0	0	0	0	0	0	0	0	0.509269	0	0	0
ENSRNOT00000081449	0	0	0	0	0	0.544292	0	0	0	0	0	0
ENSRNOT00000081453	0	0	0	0	1.23456	0	0	1.17084	0	0	0	0
ENSRNOT00000081457	0	0	0	0	0	0	0	0	0	0	0	0
ENSRNOT00000081461	0	0	0	0	0	0	0	0	0	0	0	0
ENSRNOT00000081463	7.42927	20.4537	6.1842	0.277704	3.5408	0.006659	0.000255	2e-06	44.3605	0.000233	1e-06	0.000353
ENSRNOT00000081464	0	0	0	0	1.3151	0	0	0	0	0	0	0
ENSRNOT00000081466	2159.74	2017.75	2337.99	2055.2	2310.28	2725.25	2493.25	2337.56	2752.85	2913.27	2551.31	2531.75
ENSRNOT00000081475	0	0.832487	0	0	0.278886	0.722826	0	0	0	0	0	0
ENSRNOT00000081476	0	0	0	0	0	0	0	0	0	0	0	0
ENSRNOT00000081477	0	0	0	0	0	0	0	0	0	0	0	0
ENSRNOT00000081480	0	0	0	0	0	0	0	0	0	2.65262	0	0
ENSRNOT00000081483	0	0	0	0	0	0	0	0	0	0	0	0
ENSRNOT00000081485	0	0	0	0	0	0	0	0	0	1.96115	0	0
ENSRNOT00000081492	0	0	0	0	0	0	0	0	0	0	0	0
ENSRNOT00000081499	8.62385	28.1433	14.658	13.6876	13.9155	21.7216	11.9484	11.9386	11.6413	15.1008	15.1105	14.5817
ENSRNOT00000081503	0	0	0	0	0	0	0	0	0	0	0	0
ENSRNOT00000081520	0	0	0	0	0	0	0	0	0	0	0	0
ENSRNOT00000081524	185.436	132.875	172.551	191.546	126.097	212.938	174.409	135.26	213.342	199.149	193.287	223.522
ENSRNOT00000081526	0	0	0	0	0	0	0	0	0	7.87484	0	1.45114
ENSRNOT00000081529	0	0	0	0	1.85857	0	0	1.6885	0	0	0	0
ENSRNOT00000081536	0	0	0	0	0	0	0	0	0	0	0	0
ENSRNOT00000081543	0	0	0	0	0	0	0	0	0	0	0	0
ENSRNOT00000081548	2.33736	0	3.22145	0	0	1.63065	3.37437	1.68277	0	1.60929	1.69023	1.53036
ENSRNOT00000081549	0	1.85484	0	7e-06	1.00556	0.945544	0	1.19105	1.65791	0	0	1.25743
ENSRNOT00000081550	0	0	0	0	0	0	0	0	0	0	0	0
ENSRNOT00000081555	14.4446	14.3464	12.4214	6.12379	4.95527	9.0882	8.21992	16.7343	13.2827	9.97257	5.92282	15.9018
ENSRNOT00000081556	0	0	0	0	0	0	0	0	0	0	0	0
ENSRNOT00000081562	0	0	0	0	0	0	0	0	0	0	0	2.3849
ENSRNOT00000081566	0	0	0	0	0	0	0	0	0	0	0	0
ENSRNOT00000081572	441.332	1312.53	813.453	524.31	671.573	927.238	602.021	659.181	720.609	822.58	717.296	715.481
ENSRNOT00000081578	0	0	0	0	0	0	0	0	0	0	0	0
ENSRNOT00000081584	0	0	0	0	0	0	0	0	0	0	0	0
ENSRNOT00000081586	152.1	135.843	143.137	135.87	158.225	155.966	145.939	122.291	140.82	188.782	133.588	151.504
ENSRNOT00000081606	0	0	0	0	0	0	0	0	0	0	0	0
ENSRNOT00000081611	77.6408	77.3752	58.1859	98.5109	102.251	93.2747	98.5962	103.913	126.032	125.154	112.821	116.346
ENSRNOT00000081619	0	0	0	0	0	0	0	0	0	0	0	0
ENSRNOT00000081622	7.51244	19.453	39.6327	11.2951	41.8663	7.42264	14.2292	19.7888	22.7223	16.0659	29.4766	8.43938
ENSRNOT00000081626	0	1.05691	1.08673	0	0	0	0	0	0	0	0	0
ENSRNOT00000081627	0	0	0	0	0	0	0	0	0	0	0	0
ENSRNOT00000081630	0	0	0	0	0	0	0	0	0	0	0	0
ENSRNOT00000081636	6.05979	18.0318	22.1839	6.50489	15.47	12.998	1.60901	11.9224	52.3721	67.7684	15.8789	10.7665
ENSRNOT00000081639	0	0	0	0	0	0	0	0	0	0	0	0
ENSRNOT00000081641	0	0	0	0	0	0	0	0	0	0	0	0
ENSRNOT00000081644	0	0	0	0	0	0	0	0	0	0	0	0
ENSRNOT00000081647	20.2266	21.9783	14.5526	17.8414	11.9848	23.5499	15.0667	18.8797	27.7847	20.3661	24.5569	15.0456
ENSRNOT00000081654	0	0	0	0	0	0	0	0	0	0	0	0
ENSRNOT00000081655	0	0	0	0	0	0	0	0	0	0	0	0
ENSRNOT00000081658	0	12.5921	0.066897	0	0	4.66684	1e-06	0	0	22.1812	0.000312	9.35783
ENSRNOT00000081665	0	1.03777	0	0	0	6.50242	0	0.584154	0	2.06696	0	1.91708
ENSRNOT00000081674	0	0	0	0	1.24747	0	1.27259	0	0	0	0	0
ENSRNOT00000081683	0	0	0	0	0	0	0	0	0	0	0	0
ENSRNOT00000081685	0	0	0	0	0	0	0	0	0	0	0	0
ENSRNOT00000081689	216.961	152.729	144.056	82.4418	205.325	197.32	138.427	186.579	99.0622	279.478	126.496	78.9772
ENSRNOT00000081690	0	0	0	0	0	0	0	0	0	0	0	0
ENSRNOT00000081693	0	0	0	0	0	0	0	0	0	0	0	0
ENSRNOT00000081704	17.4644	9.48323	15.917	18.6259	11.6315	13.7944	22.2683	18.8342	8.50817	23.9319	13.8615	18.1631
ENSRNOT00000081706	3.81292	0	0	0	0	1.30922	1.44437	0	8.31477	13.6994	14.9791	2.54361
ENSRNOT00000081710	0	0	0	0	0	0	0	0	0	0	0	0
ENSRNOT00000081713	0	0	0	0	0	0	0	0	0	0	0	0
ENSRNOT00000081716	3.71681	0	0	0	1.08916	0	1.06092	0	2.11392	2.9376	0	0
ENSRNOT00000081717	0	0	0	0	0	0	0	0	0	1.4519	0	0
ENSRNOT00000081721	0	0	0	0	0	0	0	0	0	0	0	0
ENSRNOT00000081722	0	0	0	0	0	0	0	0	0	0	0	0
ENSRNOT00000081723	0	0	0	0	0	0	0	0	0	0	0	0
ENSRNOT00000081729	0	0	0	0	0	0	0	0	0	0	0	0
ENSRNOT00000081730	0	0	0	0	0	0	0	0.622158	0.585039	0.583247	0.588537	0
ENSRNOT00000081741	0	0	0	0	0	0	0	0	0	0	0	0
ENSRNOT00000081751	0	0	0	0	0	0	0	0	0	0	0	0
ENSRNOT00000081752	0	0	0	0	0	0	0	0	0	0	0	0
ENSRNOT00000081753	7.52344	4.04288	3.55413	3.99409	5.78652	9.82429	2.76158	5.49731	1.9465	11.7763	11.4289	9.9829
ENSRNOT00000081754	0	0	0	0	0	0	0	0	0	0	0	0
ENSRNOT00000081755	0	0	0	0	3.04419	0	1e-06	0	0	0.049419	0	0.219404
ENSRNOT00000081763	58.313	159.078	149.737	93.9233	128.328	146.421	81.73	88.5131	131.79	127.001	156.813	180.805
ENSRNOT00000081771	0	0	0	0	0	0	0	0	0	0	0	0
ENSRNOT00000081772	0	0	0	0	0	0	0	0	0	0	0	0
ENSRNOT00000081777	9.12843	3.04396	6.2002	2.92578	3.54153	6.64283	4.31245	3.53652	3.69366	4.35982	1.532	0
ENSRNOT00000081779	0.7083	28.2032	4.28094	1.60989	1.55481	13.5078	0.591512	0.535656	2.73625	2.98166	14.4552	4.29187
ENSRNOT00000081781	0	0	0	0	0	0	0	0	0	0	0	0
ENSRNOT00000081785	0	0	0	0	0	0	0	0	0	0	0	0
ENSRNOT00000081788	0	0	0	0	0	0	0	0	0	0	0	0
ENSRNOT00000081789	0	0	0	0	0	0	0	0	0	0	0	0
ENSRNOT00000081799	0	0	0	0	0	0	0	0	0	1.84704	0	0
ENSRNOT00000081801	0	0	0	0	0	0	0	0	0	0	0	0
ENSRNOT00000081808	0	0	0	0	0	0	0	0	0	0	0	0
ENSRNOT00000081812	162.725	316.121	215.288	297.962	215.958	317.992	230.034	262.636	261.54	313.387	352.33	350.356
ENSRNOT00000081821	0	0	0	0	0	0	0	0	0	0	0	0
ENSRNOT00000081827	0.983941	0	0.754028	0.030125	0	0	0	0.788429	0.741252	0	0	0
ENSRNOT00000081828	0	0	0	0	0	0	0	0	0	0	0	0
ENSRNOT00000081840	0	0	0	0	0	0	0	0	0	1.03208	0	0
ENSRNOT00000081842	0	0	0	0	0	0	0	0	0	0	0	0
ENSRNOT00000081844	0	0	0	0	0	0	0	0	0	0	0	0
ENSRNOT00000081856	0	0	0	0	0	0	0	0	0	0	0	0
ENSRNOT00000081861	0	0	0	0	0	0	0	0	0	0	0	0
ENSRNOT00000081862	0	0	0	0	0	1.3103	0	0	1.34166	0	0	0
ENSRNOT00000081869	0	0	0	0	0	0	0	0	0	0	0	0
ENSRNOT00000081870	5.14301	0.892171	3.78412	1.78044	1.07576	0.927205	1.05772	1.98446	2.93515	0.97183	0	2.6904
ENSRNOT00000081873	0	5.1338	1.32436	2.43139	2.89033	7.58201	2.76387	4.13004	2.62773	3.90372	5.16331	2.55695
ENSRNOT00000081874	0	0	0	0	0	0	0	0	0	0	0	0
ENSRNOT00000081876	0	0	0	0	0	0	0	0	0	0	0	0
ENSRNOT00000081877	1.78407	0	0	0	0	0	0	0	0	0	0	0
ENSRNOT00000081896	267.859	188.825	186.34	594.641	394.733	401.951	516.885	411.597	414.936	398.442	602.345	513.069
ENSRNOT00000081901	5.69627	0	2.18274	0	2.3655	2.55698	1.18427	2.33184	14.3902	7.25864	7.37084	1.1472
ENSRNOT00000081902	1.23652	8.55616	24.8363	15.0935	20.3026	13.6982	16.1918	4.46519	3.47821	13.3081	37.0171	4.70292
ENSRNOT00000081905	0	0	1.23944	0	0	0	0	0	0	0	0	0
ENSRNOT00000081907	0	0	0	0	0	0	0	0	0	0	0	0
ENSRNOT00000081910	0	0	0	0	0	0	0	0	0	0	0	0
ENSRNOT00000081928	0	0	0	0	0	0	0	0	0	0	0	0
ENSRNOT00000081933	0	1.17892	0.691239	1.84257	0.001725	0	0.840282	0	0	0.266324	0.946431	0
ENSRNOT00000081935	0	0	0	0	0	0	0	0	0	0	0	0
ENSRNOT00000081941	0	0	0	0	0	0	0	0	0	0	0	0
ENSRNOT00000081949	16.0487	8.40019	19.2722	11.9722	8.70492	17.4234	3.4644	21.8944	6.14745	7.88565	10.3826	3.77259
ENSRNOT00000081963	0	0	0	0.824207	0	0	0	0	1.68008	0	0	0
ENSRNOT00000081965	300.514	66.0991	95.7094	65.0214	90.6889	151.107	69.1273	95.8477	88.2139	100.444	67.1307	112.918
ENSRNOT00000081968	3.042	140.731	6.14212	1.96285	0.002337	14.9993	5.31624	2.08901	3.14402	1.03958	12.3918	7.1294
ENSRNOT00000081969	2.74282	1.84842	0	0	2.10108	1.19945	4.32723	9.82588	28.231	5.51433	6.73675	4.49669
ENSRNOT00000081974	0	0	0	0	0	0.692084	0	0	0	0	0	0
ENSRNOT00000081985	0	0	0	0	0	0	0	0	0	0	0	0
ENSRNOT00000081987	0	0	0	0	0	0	0	0	0	0	0	0
ENSRNOT00000081988	0	0	0	0	0	0	0	0	3.01275	0	2.90398	0
ENSRNOT00000081990	0	0	0	0	0	0	0	0	0	0	0	0
ENSRNOT00000081991	0	3.6913	1.46741	5.71243	1.29279	0.999573	1.1937	2.19189	0	7.53821	0.935363	0.943725
ENSRNOT00000082004	0	0	0	0	0	0	0	0	0	0	0	0
ENSRNOT00000082006	131.919	8.53434	38.2761	0.000914	29.2694	0	24.1975	20.8367	31.5839	32.1532	7.32754	10.7331
ENSRNOT00000082007	0	0	0	0	0	0	0	0	0	0	0	0
ENSRNOT00000082014	0	0	0	0	0	0	0	0	0	0	0	0
ENSRNOT00000082015	0	0	0	0	0	0	0	0	0	0	0	0
ENSRNOT00000082019	0	18.4117	4.62699	2.56122	9.41352	13.294	1.26981	7.27972	7.76765	7.98701	4.11342	5.21457
ENSRNOT00000082020	0	3.52951	1.8113	5.12471	1.98668	0	3.89883	2.43589	1.9231	0	5.80997	1.77905
ENSRNOT00000082025	48.7744	28.2097	42.7186	25.5855	23.2926	23.7459	24.0669	21.9022	62.3405	44.644	51.6031	35.1449
ENSRNOT00000082026	1.7457	1.94869	1.83116	5.87208	4.97949	5.06484	7.08211	8.77813	5.93028	5.47155	8.28083	4.75559
ENSRNOT00000082039	0	0	0	0	0	0	0	0	0	0	0	0
ENSRNOT00000082044	0	0	1.01457	0	0	0	0	0	0	0	0	0
ENSRNOT00000082059	6.35414	4.62955	14.9231	21.6185	30.5598	33.3069	23.14	31.2118	26.2554	19.3072	10.9555	17.9174
ENSRNOT00000082061	43.958	26.7355	17.476	75.1628	60.3556	40.4825	114.045	65.2489	73.331	92.1157	99.6804	61.9706
ENSRNOT00000082063	0	0	0	0	0	0	0	0	0	0	0	0
ENSRNOT00000082072	0	0	0	0	0	0	0	0	0	0	1.90882	1.03383
ENSRNOT00000082078	0	0	0	0	0	0	0	0	0	0	0	0
ENSRNOT00000082080	0	0	0	0	0	0	0	0	0	0	0	0
ENSRNOT00000082083	0	0	0	0	0	0	0	0	0	0	0	0
ENSRNOT00000082088	0	0	0.685765	0	0	0	0	0	0.623676	0.617078	0	0
ENSRNOT00000082092	0	0.018488	0.467103	0	0	2.34569	0	0	0	0	0	0
ENSRNOT00000082099	0	0	0	0	0	0	0	0	0	1.30749	1.31707	0
ENSRNOT00000082112	334.259	734.878	493.297	385.601	471.98	581.07	373.851	409.242	489.851	471.547	495.498	408.836
ENSRNOT00000082115	0	0	0	0	0	0	0	0	1.34747	0	0	0
ENSRNOT00000082122	37.2933	0.002697	39.9116	18.0401	15.0157	21.6442	0.038634	40.7131	28.222	70.3336	19.4736	18.623
ENSRNOT00000082123	0	0	0	0	0	0	0	0	0	0	0	0
ENSRNOT00000082137	0	0	0	0	0	0	0	0	0	0	0	0
ENSRNOT00000082144	35.9896	88.2728	58.215	45.6997	56.4977	66.4552	55.3028	58.0998	63.1184	53.7398	62.0352	50.6518
ENSRNOT00000082153	0	0	0	0	0	0	0	0	0	0	0	0
ENSRNOT00000082166	437.015	337.687	343.537	369.399	344.557	548.733	442.227	370.772	418.831	435.873	421.87	499.37
ENSRNOT00000082176	0	0	0	0	0	0	0	0	0	0	0	0
ENSRNOT00000082187	0	0	0	0	0	0	0	0	0	0	0	0
ENSRNOT00000082193	1.66256	1.12838	2.32642	0	2.58952	0	2.55412	10.8418	11.0777	9.83805	3.75633	4.53395
ENSRNOT00000082199	0.629083	0.681647	0.547583	0	0	0.667496	0.572991	0	0	1.24774	0	0
ENSRNOT00000082202	126.19	135.114	125.481	142.316	94.5652	143.92	157.062	184.302	167.687	198.861	184.189	185.332
ENSRNOT00000082210	0	0	0	0	0	0	0	0	0	0	0	0
ENSRNOT00000082223	0	0	0	0	0	0	0	0	0	0	0	0
ENSRNOT00000082225	0	0	0	0	0	0	0	0	0	0	0	0
ENSRNOT00000082231	0	1.51197	0	0	1.13299	0.830231	0	0	0.914493	1.78309	0.887354	0
ENSRNOT00000082237	10.8951	47.7051	26.3075	28.7681	44.9702	50.6872	30.3169	34.4454	40.1206	49.4378	38.4018	50.9989
ENSRNOT00000082244	0	0	0	0	0	0	0	0	0	0	0	0
ENSRNOT00000082246	2.60044	1.01324	3.12464	0.998579	1.98649	6.35109	1.12071	3.31245	4.32254	1.06501	1.09072	1.03163
ENSRNOT00000082248	0	0	0	0	0	0	0	0	0	0	0	0
ENSRNOT00000082250	0	0	0	0	0	1.42237	0	0	0	0	0	0
ENSRNOT00000082256	0	0	0	0	0	0	0	0	0	0	0	0
ENSRNOT00000082259	70.8986	1.19206	1.54524	2.68435	10.527	2.68214	5.00977	5.05608	0	2.31546	0	3.30629
ENSRNOT00000082261	0	0	0	0	0	0	0	0	0	0	0	0
ENSRNOT00000082269	0	0	0	0	0	0	0	0	0	0	0	0
ENSRNOT00000082274	1.39089	0.796541	0	0	0	0	0	0	0	0	0	0
ENSRNOT00000082276	18.9193	22.6264	16.8279	15.033	14.3544	19.2857	18.632	15.7872	18.5061	29.2534	8.91485	12.907
ENSRNOT00000082278	5.06694	3.53891	0	2.10537	0.925417	0.786059	1.38735	1.80067	0.403402	1.50691	1.591	1.92714
ENSRNOT00000082281	12.4767	3.4993	7.2724	3.35089	10.5889	4.25962	5.4235	9.99801	4.39289	6.78953	1.8221	11.7996
ENSRNOT00000082293	0	0	0	0	0	0	0	0	0	0	0	0
ENSRNOT00000082294	2296.97	377.709	1391.49	241.289	1285.42	513.481	700.035	1014.34	1155.74	800.908	474.581	526.84
ENSRNOT00000082296	0	0	0	0	0	0.508013	0	0	0	0	0	0
ENSRNOT00000082297	23.1007	15.7284	15.638	2.03359	9.09761	6.24796	9.24074	13.9721	10.2076	10.0975	9.52081	4.13368
ENSRNOT00000082299	0	0	0	0	0	0	0	0	0	0	0	0
ENSRNOT00000082302	0.378634	0.000226	0	0	0	0.442504	0.452451	0	0	0	0	0.435902
ENSRNOT00000082305	1.41268	0.837355	1.78281	0	3.87947	2.5897	0.878448	0.876748	2.62336	2.63389	0	1.62741
ENSRNOT00000082309	0	0	0	0	0	0	0	0	0	0	0	0
ENSRNOT00000082318	186.181	26.8614	109.799	23.3066	77.5602	40.3116	62.3291	40.2439	132.23	130.788	53.4822	108.164
ENSRNOT00000082323	0	0	0	0	0	0	0	0	0	0	0	0
ENSRNOT00000082324	0	0	0	0	0	0	0	0	0	0	0	0
ENSRNOT00000082329	0	0	0	3.11199	0	0	0	0	0	3.33107	0	3.3253
ENSRNOT00000082330	4.11839	5.31236	5.07557	3.32166	9.53839	5.7492	5.98837	2.51709	4.96343	10.5532	8.26906	7.72503
ENSRNOT00000082349	0.871623	0	0	0	0	0	0	0	0	0	0	0
ENSRNOT00000082350	0	0	0	0	0	0	0	0	0	0	0	0
ENSRNOT00000082351	4.55409	0	0	0	6.00568	0	0	3.47334	0	0	0	2.24974
ENSRNOT00000082352	0	0	0	0	0	0	0	0	0	0	0	0
ENSRNOT00000082354	0	0	0	0	0	0	0	1.44316	0	0	0	0
ENSRNOT00000082364	0.704045	13.1111	1.02969	7.27037	0.975994	4.99514	4.20506	4.11766	20.3344	24.9574	15.2543	7.26065
ENSRNOT00000082365	0	0	11.1498	0	1.2454	0	10.1868	3.6118	20.0151	15.5294	2.98804	7.08864
ENSRNOT00000082366	109.856	192.415	192.615	205.29	198.604	225.222	210.8	215.587	203.489	241.232	239.712	240.262
ENSRNOT00000082368	0	0	0	0	5.87766	3.00136	0	0	1.62569	4.08494	0	0
ENSRNOT00000082370	0	0	0	0	0	0	0	0	0	0	0	0
ENSRNOT00000082374	0	0	0	0	0	0	0	0	0	0	0	0
ENSRNOT00000082379	0	0	0	0	0	0	0	0	0	0	0	0
ENSRNOT00000082384	0	0	0	0	0	0	0	0	0	0	0	0
ENSRNOT00000082386	12.7652	16.9011	23.819	23.0486	20.6562	46.9108	21.1335	32.0439	23.9703	25.3558	46.4983	20.1209
ENSRNOT00000082396	0	0	0	0	0	0	0	0	0	0	0	0
ENSRNOT00000082397	0	0	0	0	0	0	0	0	0	0	0	0
ENSRNOT00000082405	438.195	146.671	175.771	84.6629	218.185	151.296	172.666	210.23	100.508	156.184	80.3803	103.082
ENSRNOT00000082407	0	0	0	0	0	0	0	0	0	0	0	0
ENSRNOT00000082409	0	0	0	0	0	0	0	0	0	0	0	0
ENSRNOT00000082414	0	0	0	0	0	0	0	0	0	0	0	0
ENSRNOT00000082420	0	0	0	0	0	0	0	0	0	0	0	0
ENSRNOT00000082424	54.5351	81.4691	36.55	88.4788	69.4887	114.556	52.4089	67.5205	67.7031	63.0912	151.558	106.921
ENSRNOT00000082428	0	0	0	0	0	0	0	0	0	0	0	0
ENSRNOT00000082432	2.74868	4.63457	4.55547	3.90312	6.14459	10.0736	5.36471	2.82764	3.51703	8.72712	6.46507	7.1425
ENSRNOT00000082440	1.78451	7.51078	0	0.812533	0	1.67888	0.848537	0	0	3.12846	0	0.810608
ENSRNOT00000082443	0	0	0	0	0	0	0	0	0	0	0	0
ENSRNOT00000082446	0	0	0	0	0	0	0	0	0	0	0	0
ENSRNOT00000082454	0	0	0	0	0	0	0	0	0	0	0	0
ENSRNOT00000082456	0	0	0	0	0	0	0	0	0	0	0	0
ENSRNOT00000082461	0	0	0.002761	0.002649	0.008405	0	0.487291	0	0	0	0	0
ENSRNOT00000082475	0	0	0	0	0	0	0	0	0	0	0	0
ENSRNOT00000082478	0	0	0	0	0	0	0	0	2.49166	5.87185	0	0
ENSRNOT00000082481	0	0	0	0	0	0	0	0	0	0	0	0
ENSRNOT00000082483	5.21439	0	5.59491	0	1.05136	6.55926	1.98648	2.97253	2.94521	1.99926	3.98999	1.90893
ENSRNOT00000082491	10.1239	11.5053	6.84892	11.0505	2.78618	6.50594	7.44781	9.96132	16.9076	17.6354	12.9844	6.91752
ENSRNOT00000082493	3.75726	0	0	0	3.17101	0	0	0	0	2.52428	0	4.77935
ENSRNOT00000082506	0	0	0	0	0	0	0	0	0	0	0	0
ENSRNOT00000082516	0	0	0	0	0	0	0	0	0	0	0	0
ENSRNOT00000082520	23.4235	26.8968	26.7985	7.11895	53.3409	23.559	10.5528	3.76	52.7501	17.2194	33.4146	35.7743
ENSRNOT00000082525	0	0	0	0	0	0	0	0	0	0	0	0
ENSRNOT00000082540	0	0	0	0.050284	0	0	0	0	0	0	0	0
ENSRNOT00000082569	2.55208	4.40782	0	0	0.809426	4.42541	0	0.814267	0.8526	3.34128	0	3.25594
ENSRNOT00000082571	0.506497	0.395021	0	2.98408	1.69534	1.68845	0	0	0.421547	0.377761	0.424275	0
ENSRNOT00000082572	0	0	0	0	0	0	0	0	0	0	0	0
ENSRNOT00000082574	0	0	0	0	0	0	0	0	0	0	0	0
ENSRNOT00000082578	49.232	25.333	17.9972	20.251	18.6558	45.3447	20.989	23.133	46.6249	40.5253	24.015	35.9344
ENSRNOT00000082580	0	0	0	0	0	0	0	2.22301	0	0	0	0
ENSRNOT00000082584	0	0	0	0	0	0	1.00877	0	0.969338	0.959563	0	0.865737
ENSRNOT00000082588	195.528	232.679	164.226	108.438	188.23	170.359	234.821	212.08	184.615	199.3	260.679	217.385
ENSRNOT00000082606	0	0	0	0	0	0	0	0	0	0	0	0
ENSRNOT00000082609	0	0	0	0	0	0	0	0	0	0	0	0
ENSRNOT00000082613	0	0	0	0	0	0	0	0	0	0	0	0
ENSRNOT00000082615	0	0	0	0	0	0	0	0	0	0	0	0
ENSRNOT00000082617	0	0	0	0	0	0	0	0	0	0	0	0
ENSRNOT00000082620	101.609	180.323	91.5779	82.2686	183.865	104.256	76.8644	99.5544	102.209	118.745	79.7356	76.6679
ENSRNOT00000082633	50.8273	97.5608	59.7268	39.3098	70.0486	65.3176	62.8338	45.1	57.8847	38.8563	94.9147	30.3163
ENSRNOT00000082634	5.56791	22.4597	4.46338	7.49001	8.81218	12.2862	14.7942	12.258	12.1271	13.4023	23.8004	18.393
ENSRNOT00000082636	0	0	0	0	0	0	0	0	0	0	0	0
ENSRNOT00000082638	4.22021	2.23202	0.838031	0	0	0	0.880374	0.873086	0	0	1.57089	2.15228
ENSRNOT00000082644	0	0	0	0	0	0	3.69703	0	11.1611	3.43235	3.48875	3.42444
ENSRNOT00000082654	0	1.16781	0	0	0	0	0	0	0	0	0	0
ENSRNOT00000082658	0	0	0	0	0	0	0	0	0	0	0.845293	0
ENSRNOT00000082676	0	0	0	0	0	0	0	0	0	0	0	0
ENSRNOT00000082678	4.57859	0.277313	3.23201	1.1e-05	0	1.2691	0.005531	0.309455	5.23522	3.92574	1e-06	2.27475
ENSRNOT00000082679	0	0	0	0	0	0	0	0	0	0	0	0
ENSRNOT00000082683	0	3.19255	10.0033	11.5043	3.36205	42.1668	17.4964	0	3.23074	12.4242	2.19817	1.07427
ENSRNOT00000082693	0	0	0	0	0	0	0	0	0	0	0	0
ENSRNOT00000082698	0	0	0	0	0	0	0	0	0	0	0	0
ENSRNOT00000082702	0.782459	0.825156	2.40729	0.901141	0.832914	0.918038	1.71131	0	0.884507	0.88309	2.76469	0.876939
ENSRNOT00000082703	645.342	499.777	576.216	610.906	699.155	781.591	576.096	683.84	632.935	783.354	679.305	754.75
ENSRNOT00000082708	0	0	0	0	0	0	0	0	0	0	0	0
ENSRNOT00000082710	53.4188	82.4591	47.2284	18.1111	29.5486	37.8677	23.0578	19.9844	59.4803	80.4614	30.8269	35.4691
ENSRNOT00000082715	0	0	0	0	0	0	0	0	0	0	0	0
ENSRNOT00000082716	0	0	0	0	0	0	0	0	0	0	0	0
ENSRNOT00000082726	7.37851	0	2.03862	0	2.28707	0	0	0	2.05667	0	0	0
ENSRNOT00000082729	0	13.6545	5.27876	8.93323	0	4.98804	0	10.6157	0	2.50238	5.04181	4.91401
ENSRNOT00000082731	0	0	0	0	0	0	0	0	0	0	0	0
ENSRNOT00000082735	1.13022	0	0	0	0	0	0	0	0	0	0	0
ENSRNOT00000082746	0	0	0	0	0	1.65944	0	0	0	0	0	0
ENSRNOT00000082747	127.935	647.138	538.197	722.425	421.615	888.883	638.733	583.077	684.38	761.919	736.787	868.115
ENSRNOT00000082749	0	0	0	0	1.72817	0	0	0	0	0	0	0
ENSRNOT00000082753	0	0	0	0	0	0	0	0	0	0	0	0
ENSRNOT00000082759	14.3689	10.6677	7.87458	8.05501	6.95089	11.6788	6.90114	9.85708	9.54708	4.93795	13.8227	9.52718
ENSRNOT00000082762	0	0	0	0	0	0	0	0	0	0	0	0
ENSRNOT00000082767	0	0	0	0	0	0	0	0	0	0	0	0
ENSRNOT00000082771	0	0	0	0	0	0	0	0	0	0	0	0
ENSRNOT00000082783	0	0	0	4.04611	0	0	0	0	0	0	0	0
ENSRNOT00000082788	0	0	0	0	0	0	0	0	0	0	0	0
ENSRNOT00000082797	0	13.2416	0	0	0	0	0	0	0	4.16916	0	0
ENSRNOT00000082800	15.4533	8.37929	10.8374	14.1636	9.25874	26.882	21.629	14.8119	15.3373	16.5108	7.92032	22.5739
ENSRNOT00000082803	0	0	0	0	0	0	0	0	0	0	0	0
ENSRNOT00000082808	0	0	0	0	0	0	0	0	0	0	0	0
ENSRNOT00000082812	0	0	0	0	0	0	0	0	0	0	0	0
ENSRNOT00000082818	0	0	0	0	0	0	0	0	0	0	0	0
ENSRNOT00000082819	0	0	0	0	0	0	0	0	0	0	0	0
ENSRNOT00000082824	0	0	0	0	2.51972	0	0	0	0	0	0	0
ENSRNOT00000082826	1.3772	0	0.971277	0	0	0	0	1.02054	1.96356	0	0.982793	0.890791
ENSRNOT00000082833	0	0	0	0	0	0	0	0	0	0	0	0
ENSRNOT00000082835	0	0	0	0	0	0	0	0	0	0	0	0
ENSRNOT00000082851	0	0	0	0	0	0	0	0	0	0	0	0
ENSRNOT00000082852	0	0	0	0	0	0	0	0	0	0	0	0
ENSRNOT00000082853	0	0	0	0	0	0	0	0	0	0	0	0
ENSRNOT00000082859	0	1.58271	0	0	0	0	0	0	0	0	0	0
ENSRNOT00000082868	0	0	0	0	0	0	0	0	0	0	0	0
ENSRNOT00000082870	0	0	0	0	0	0	0	0.000873	0	0	0	0
ENSRNOT00000082877	0	0	0	0	0	0	0	0	0	0	0	0
ENSRNOT00000082878	0	0	0	0	0	0	0	0	0	0	0	0
ENSRNOT00000082882	0	0.833633	3.90522	0.839794	0.842946	3.37836	0.821776	0.773851	1.65152	1.67789	1.76056	1.67886
ENSRNOT00000082887	0	0	0	0	0	0	0	0	0	0	0	0
ENSRNOT00000082889	0	0	0	0	0	0	0	0	0	0	0	0
ENSRNOT00000082890	0	0	0	0	0	0	0	0	0	0	0	0
ENSRNOT00000082897	109.785	23.3233	55.3689	14.7742	30.64	36.8662	28.1534	45.1651	24.7198	19.3406	29.8512	26.7874
ENSRNOT00000082916	4.81525	24.1691	15.3347	18.7842	27.2765	61.6991	41.1941	17.7926	23.9936	35.3356	26.3198	23.429
ENSRNOT00000082918	23.1975	30.5342	20.1127	1.4424	1.62112	4.13752	27.3188	11.3696	43.1109	44.8748	25.3216	27.1616
ENSRNOT00000082925	0	0	0	0	0	0	0	0	0	0	0	0
ENSRNOT00000082937	21.6885	20.269	14.6217	14.6695	9.07393	18.813	16.6764	14.1885	13.1232	21.1911	18.2951	5.05986
ENSRNOT00000082939	0	0	0	0	0	0	0	0	0	0	0	0
ENSRNOT00000082944	0	0	0	0	0	0	0	0	0	0	0	0
ENSRNOT00000082947	0	0	0	0	0	0	0	0	0	0	0	0
ENSRNOT00000082950	0	0	0	0	0	0	0	0	0	0	0	0
ENSRNOT00000082975	3.02103	2.80963	3.93398	1.54971	0	0	0	3.90466	0	0	0	1.59614
ENSRNOT00000082976	0	0	0	0	0	0	0	0	0	0	0	0
ENSRNOT00000082979	0	0	0	0	0	0	0	0	0	0	0	0
ENSRNOT00000082984	0	0	0	0	0	0	0	0	0	0.429067	0	0
ENSRNOT00000082986	0	0	0	0	0	0	0	0	0	0	0	0
ENSRNOT00000083008	0	0	0	0	0	0	0	0	0	0	0	0
ENSRNOT00000083020	0	0	0	0	0	0	0	0	0	0	0	0
ENSRNOT00000083023	0	0	0	0	0	0	0	0	0	0	0	0
ENSRNOT00000083024	0	0	0	0	0	0	0	0	0	0	0	0
ENSRNOT00000083026	0	0	0	0	0	0	0	0	0	0	0	0
ENSRNOT00000083030	0	0	0	0	0	0	0	0	0	0	0	0
ENSRNOT00000083036	0	0	0	0	0	0	0	0	0	0	0	0
ENSRNOT00000083042	0	0	0	0	0	0	0	0	0	0	0	0
ENSRNOT00000083047	0	6.88592	27.0987	0	0	0	7.32695	7.27949	7.23996	0	0	0
ENSRNOT00000083048	26.3623	0	2.53508	0	2.71874	0	0.88784	0.875668	0	0	0	0
ENSRNOT00000083054	0.66595	4.27926	0.816791	6.10319	7.32869	9.52853	3.44748	6.6228	8.76684	7.51697	8.12059	8.33563
ENSRNOT00000083057	0	0	0	0	0	0	0	0	0	0	0	0
ENSRNOT00000083059	47.8686	0	11.9284	0	13.6839	0	4.4271	1.85016	1.18568	0	0	1.33341
ENSRNOT00000083082	0	0	0	0	0	0.00244	0	0	0	0	0	0
ENSRNOT00000083083	50.0822	25.8031	36.5557	23.7682	44.8424	32.3919	30.3019	39.7532	37.0364	29.3999	34.8835	30.2859
ENSRNOT00000083098	0	0	0	0	0	0	0	0	0	0	0	0
ENSRNOT00000083114	0	0	1.43833	0	0	0	0	0	0	0	0	0
ENSRNOT00000083119	114.77	46.5473	43.2104	33.4174	79.0831	54.4573	44.0709	59.0176	28.2464	33.1415	34.6894	38.8878
ENSRNOT00000083121	0	0	0	0	0	0	0	0	0	0	0	0
ENSRNOT00000083123	0	0	0	0	0	0	0	0	0	0	0	0
ENSRNOT00000083131	81.2239	59.7501	45.7115	29.7708	47.7157	54.6472	64.516	59.8823	69.009	66.509	66.8789	82.8595
ENSRNOT00000083161	3.75892	1.07006	1.11342	2.15088	2.32478	2.1198	1.09831	1.1094	3.28021	2.23962	0	0
ENSRNOT00000083165	0	0	0	0	0	0	0	0	0	0	0	1.99681
ENSRNOT00000083167	0	0	0	0	0	0	0	0	0	0	0	0
ENSRNOT00000083170	0	0	1.43215	0	0	0	0	0	0	0	0	0
ENSRNOT00000083175	0	0	0	0	0	0	0	0	0	1.02723	0	0
ENSRNOT00000083180	0	0	0	0	0	0	0	0	0	0	0	0
ENSRNOT00000083187	12.9436	28.9727	20.1557	23.7649	5.44241	37.4656	11.7196	18.8245	15.5682	9.92253	29.2712	36.9888
ENSRNOT00000083195	0	0	0	0	0	0	0	0	0	0	0	0
ENSRNOT00000083197	0	0	0	0	0	0	0	0	0	0	0	0
ENSRNOT00000083200	0.962742	0	0.718593	2.72774	0	0	0	0.746052	0.706784	0	0	0
ENSRNOT00000083201	0	0	0	0	0	0	0	0	0	0	0	0
ENSRNOT00000083205	0	0	0	0	0	0	0	0	0	0	0	0
ENSRNOT00000083207	0	0	0	0	0	0	0	0	0	0	0	0
ENSRNOT00000083209	0	0	0	0	0	0	0	0	0	0	0	0
ENSRNOT00000083213	0	0	0	0	0	0	0	0	0	0	0	0
ENSRNOT00000083218	203.655	117.242	163.718	169.597	183.657	186.982	184.901	218.956	214.097	241.934	234.123	186.148
ENSRNOT00000083221	1.09674	0.788118	0	0	0	0	0.422852	0	0	0	0	0.001708
ENSRNOT00000083235	0	0	0	0	0	0	0	0	0	0	0	0
ENSRNOT00000083236	63.279	198.642	99.3663	116.707	117.754	182.066	109.218	117.498	93.3846	138.258	175.8	156.652
ENSRNOT00000083241	2.57301	0	1.8822	0	0	0	0	0	0	0	1.60059	0
ENSRNOT00000083244	0	0	0	0	0	0	0	0	0.784302	0	0	0
ENSRNOT00000083246	600.4	633.476	647.084	875.984	742.034	964.11	870.71	814.17	715.5	860.532	874.318	903.225
ENSRNOT00000083249	400.027	780.515	694.383	557.825	687.752	744.893	647.508	584.313	666.487	745.557	635.043	634.914
ENSRNOT00000083253	0	0	0	0	0	0	0	0	0	0	0	0
ENSRNOT00000083257	0	0	0	0	0	0	0	0	0	0	0	0
ENSRNOT00000083259	0	0	0	0	0	0	0	0	0	0	0	0
ENSRNOT00000083266	0	0	1.06153	0	0	0	0	0	0	0	0	0
ENSRNOT00000083267	0	0	0	0	0	0	0	0	1.92895	3.69949	2.04095	0
ENSRNOT00000083270	0	0	0	0	0	0	0	0	0	0	0	0
ENSRNOT00000083273	0	0	0	0	0	0	0	0	0	0	0	0
ENSRNOT00000083274	0	0	0	0	0	0	0	0	0	0	0	0
ENSRNOT00000083279	0	0	0	0	0	0	0	0	0	0	1.45724	0
ENSRNOT00000083285	0	1.501	0.399243	0	1.69893	0	3.24066	1.59733	4.08897	1.57952	2.37727	1.50561
ENSRNOT00000083290	0	0	0	0	0	0	0	0	0	0	0	0
ENSRNOT00000083294	0	0	0	0	0	0	0	0	0	0	0	0
ENSRNOT00000083297	0	0	0	0	0	0	0	0	0	0	0	0
ENSRNOT00000083298	0	0	0	0	0	0	0	0	0	0	0	0
ENSRNOT00000083307	7.3108	1.91	0	0	4.08222	0.940721	4.61906	5.719	3.87316	2.87386	0.96013	0.919182
ENSRNOT00000083309	0	0	0	0	0	0	0	0	0	0	0	0
ENSRNOT00000083321	0	0	0	0	0	0	0	0	0	0	0	0
ENSRNOT00000083323	200.185	782.523	272.651	483.157	402.872	418.805	326.046	326.286	312.515	340.502	435.829	503.522
ENSRNOT00000083324	0	0	0	0	0	0	0	0.914129	1.91864	0	0	0
ENSRNOT00000083326	0	0	0	0	0	0	0	0	0	0	0	0
ENSRNOT00000083327	0	0	0	0	0	0	0	0	0	0	0	0
ENSRNOT00000083328	35.8067	9.79328	10.2822	8.32305	12.7448	5.6261	11.5049	7.49026	16.0143	8.27913	7.20741	9.32754
ENSRNOT00000083332	0	0	0	0	0	0	0	0	0	0	0	0
ENSRNOT00000083335	0	0	0	0	0	0	0	0	0	0	0	0
ENSRNOT00000083338	19.9528	10.5861	27.8797	5.65566	19.6043	5.4108	16.099	21.1662	24.7341	23.3273	16.1192	14.4769
ENSRNOT00000083343	0	0	0	0	0	0	0	0	0	0	0	0
ENSRNOT00000083349	0	0	0	0	0	0	0	0	0	0	0	0
ENSRNOT00000083359	0	0	0	0	0	0	0	0	0	0	0	0
ENSRNOT00000083360	0	0	0	0	0	0	0	0	0	0	0	0
ENSRNOT00000083367	0	0	0	0	0	0	0	0	0	0	0	0
ENSRNOT00000083375	0	0	0	0	0	0	0	0	0	0	0	0
ENSRNOT00000083380	19.1409	17.5501	21.7492	13.6014	29.6716	13.1506	14.6246	18.355	26.3817	15.8869	13.5401	13.7952
ENSRNOT00000083384	0	0	0	0	0	0	0	0	0	0	0	0
ENSRNOT00000083393	707.311	211.314	284.432	424.14	451.991	393.848	387.229	380.189	453.53	443.067	392.809	501.09
ENSRNOT00000083398	0	0	0	0	0	0	0	0	0	0	0	0
ENSRNOT00000083399	0	0	0	0	0	0	0	0	0	0	0	0
ENSRNOT00000083403	0	2.99411	3.0046	0	0	0	0	0	0	0	0	0
ENSRNOT00000083431	0	0	0	0	0	0	0	0	0	0	0	0
ENSRNOT00000083435	0	0	0	0	0	0	0	0	0	0	0	0
ENSRNOT00000083437	0	1.03631	1.10144	1.0487	2.38571	1.04036	0	1.11946	0	0	3.19027	4.22897
ENSRNOT00000083444	6.09161	18.8556	15.8886	17.2272	4.34769	2.41907	30.3037	11.6904	15.6695	15.5868	20.8936	12.6829
ENSRNOT00000083463	0	0	0	0	0	0	0	0	0	0	0	0
ENSRNOT00000083465	4.93268	1.22735	3.66308	0.79345	1.49455	1.33454	2.21222	0.751626	4.01104	0.761031	0.383126	0.763518
ENSRNOT00000083482	0	0	0	0	1.88888	0	0	0	0	0	0	0
ENSRNOT00000083498	0	0	0	0	0	0	0	0	0	0	0	0
ENSRNOT00000083501	0	0	0	0	0	0	0	0	0	0	0	0
ENSRNOT00000083507	0	0	0	0	0	0	0	0	0	0	0	0
ENSRNOT00000083510	0	2.962	0.966462	0.925066	0	3.87177	1.01412	1.98984	0.976544	0.972994	0.987894	0.948601
ENSRNOT00000083512	0	0	0	0	0	0	0	0	0	0	0	0
ENSRNOT00000083513	0	0	0	0	0	0	0	0	0	0	0	0
ENSRNOT00000083516	0	0	0	0	0	2.38006	0	0	0	0	0	0
ENSRNOT00000083520	0	0	0	0	0	0	0	0	0	0	0	0
ENSRNOT00000083522	0	0	0	0	0	0	0	0	0	0	0	0
ENSRNOT00000083523	11.319	26.9334	24.1025	22.3443	22.3231	24.0515	23.7105	14.6256	14.9065	17.2101	31.2054	17.3403
ENSRNOT00000083525	0	0	0	0	0	0	0	0	0	0	0	0
ENSRNOT00000083526	0	0	0	0	0	0	0.041432	0	5.92289	13.4396	6.94909	0
ENSRNOT00000083529	0	0	0	0	0	0	0	0	0	0	0	0
ENSRNOT00000083543	0	0	0	0	0	0	0	0	0	0	0	0
ENSRNOT00000083544	18.4006	10.2684	9.15033	7.32768	15.991	12.9956	21.5693	11.3435	12.7971	12.1745	18.01	14.1404
ENSRNOT00000083547	0	0	0	0	0	0	0	0	0	0	0	0
ENSRNOT00000083554	11.575	23.9257	12.6964	11.7673	0.954847	10.0332	2.68637	6.3e-05	8.15019	5.98717	13.6444	2.3316
ENSRNOT00000083559	0	0	0.38138	0	0	0	0	0	1.12516	0.372507	0	0
ENSRNOT00000083571	0	0	0	0	0	0	0	0	0	0	0	0
ENSRNOT00000083581	20.1229	7.99831	7.39089	1.56489	9.21606	9.83155	6.7707	12.8183	9.84186	4.67441	5.13673	3.19534
ENSRNOT00000083586	0	0	0	0	0	0	0	0	0	0	0	0
ENSRNOT00000083589	1285.92	754.498	620.503	341.588	524.422	595.2	328.365	529.563	521.281	654.628	336.147	469.242
ENSRNOT00000083596	0	0	0	0	0	0	0	0	0	0	0	0
ENSRNOT00000083597	6.80837	4.19661	6.18839	6.39938	9.63086	4.2901	5.97813	4.16229	5.43341	9.62529	10.4278	3.15415
ENSRNOT00000083603	0	0	0	0	0	0	0	0	0	0	0	0
ENSRNOT00000083606	8.96058	1.20621	0	2.29954	1.36072	0	5.07382	2.53836	3.64528	9.84974	6.23904	0
ENSRNOT00000083612	0	0	0	0	0	0	0	0	0	0	0	0
ENSRNOT00000083618	0	0	0	0	0	0	0	0	0	0	0	0
ENSRNOT00000083619	0.794579	1.18304	0	1.19965	0	2.44782	0	2.05618	0	1.14468	0	1.15224
ENSRNOT00000083620	0	0	0	0	0	0	0	1.19582	0	0	0	0
ENSRNOT00000083621	0	0	0	0	0	0	0	0	0	0	0	0
ENSRNOT00000083625	2.52172	3.07557	21.9432	7.38841	3.7154	0	5.16061	10.6088	21.0966	4.69068	3.12125	4.54684
ENSRNOT00000083631	0	0	0	0	0	0	0	0	0	0	0	0
ENSRNOT00000083635	0	0	0	0	0	0	0	0	0	0	0	0
ENSRNOT00000083636	6.8e-05	0	0	0	0	0	0	2e-06	0	0	0.000318	0
ENSRNOT00000083639	0	0	0	0	0	0	0	0	0	0	0	0
ENSRNOT00000083644	0	0	0	0	0	0	0	0	0	0	0	0
ENSRNOT00000083646	0	0	0	0	0	0	0	0	0	0	0	0
ENSRNOT00000083647	0	0	0	0	0	0	0	0	0	0	0	0
ENSRNOT00000083653	4.08134	0	0	3.02531	8.17848	2.10153	4.37669	1.08601	7.353	2.06306	2.12707	2.01083
ENSRNOT00000083654	0	0	0	0	0	0	0	0	0	0	0	0
ENSRNOT00000083663	0	0	0	0	0	0	0	0	0	0	0	0
ENSRNOT00000083664	0	0	0	0	0	0	0	0	0	0	0	0
ENSRNOT00000083669	0	0	0	0	0	0	0	0	0	0	0	0
ENSRNOT00000083671	0	0	0	0	0	0	0	0	0	0	0	0
ENSRNOT00000083675	0	0	0	0	0	0	0	0	0	0	0	0
ENSRNOT00000083679	0	0	0	0	0	0	0	0	0	0	0	0
ENSRNOT00000083680	0	0	0	0	0	0	0	0	0	0	0	0
ENSRNOT00000083690	0	0	0	0	0	0	0	0	0	0	0	0
ENSRNOT00000083697	0	0	0	0	0	0	0	0	0	0.003248	0	0
ENSRNOT00000083710	0	0	0	0	0	0	0	0	0	0	0	0
ENSRNOT00000083711	38.7347	144.223	73.2142	49.3085	67.4397	91.0522	65.6408	82.078	98.3931	96.1885	91.2866	118.184
ENSRNOT00000083718	2103.55	349.045	889.201	183.621	899.507	527.15	473.55	1101.13	501.647	649.749	309.986	445.888
ENSRNOT00000083722	0	0	0	0	0	0	0	0	0	0	0	0
ENSRNOT00000083724	0	0	1.773	0	1.57408	2.21856	0	1.53916	0	0	0	1.83553
ENSRNOT00000083729	0	0	0	0	0	0	0	0	0	0	0	0
ENSRNOT00000083730	0	0	0	0	0	0	0	0	0	0	0	0
ENSRNOT00000083731	0	0	0	0	0	0	0	0	0	0	0	0
ENSRNOT00000083737	0	0	0	0	0	0	0	0	0	0	0	0
ENSRNOT00000083739	0	0	0	0	0	0	0	0	0	0	0	0
ENSRNOT00000083741	0.504798	2.22306	0	0	1.17757	0	0	0	0.669881	0.645811	1.53859	0
ENSRNOT00000083742	0	0	0	0	0	0	0	0	0	0	0	0
ENSRNOT00000083745	0	0	0	0	0	0	0	0	0	0	0	0
ENSRNOT00000083746	0	0	0	0	0	0	1.1401	0	0	0	1.16741	0.58405
ENSRNOT00000083748	0	0	0	0	0	0	0	0	0	0	0	0
ENSRNOT00000083757	0	0	0	0	0	0	0	0	0	0	0	0
ENSRNOT00000083759	0	0	0	0	0	0	0	0	0	0	0	0
ENSRNOT00000083766	0.690109	0.907056	0	0.426159	0.387875	0.997329	1.3e-05	0.01197	0.470472	1.05848	2.42561	0
ENSRNOT00000083777	0	1.00469	1.01499	0	1.13186	0	3.2864	1.04518	2.1838	0	2.21688	0.991535
ENSRNOT00000083780	0	0	0	0	0	0	0	0	0	0	0	0
ENSRNOT00000083782	0	0	0	0	0	0	0	0	0	0	0	0
ENSRNOT00000083791	0	0	0	0	0	0	0	0	0	0	0	0
ENSRNOT00000083792	0	0	0	0	0	0	0	0	0	0	0	0
ENSRNOT00000083794	0	0	0	0	0	0	0	0	0	0	0	0
ENSRNOT00000083795	34.7062	87.3755	36.9571	73.7116	36.6379	70.2673	28.2626	54.8065	301.935	303.114	264.882	39.3341
ENSRNOT00000083801	0	0	0	0	0	0	0	0	0	0	0	0
ENSRNOT00000083802	0	0	0	0	0	0	0	0	0	0	0	0
ENSRNOT00000083807	0	0	0	0	0	0	0	0	0	0	0	0
ENSRNOT00000083808	1.51251	11.0284	2.24503	2.06848	1.25208	4.37011	4.5614	3.48655	1.09405	1.12606	8.88376	5.30032
ENSRNOT00000083809	0	0	0	0	0	0	0	0	0	0	0	0
ENSRNOT00000083810	0	0	0	0	0	0	0	0	0	0	0	0
ENSRNOT00000083820	0	0	0	0	0	0	0	0	0	0	0	0
ENSRNOT00000083822	0	0	0	0	0	0	0	0	0	0	0	0
ENSRNOT00000083825	0	0	0	0	0	0	0	0	0	0	0	0
ENSRNOT00000083837	0	4.35993	0	0	0	0	0	0	0	0	0	0
ENSRNOT00000083844	0	0	0	0	1.51276	0	0	0	0	0	0	0
ENSRNOT00000083853	0	0	0	0	0	0	0	0	0	0	0	0
ENSRNOT00000083856	137.475	103.133	129.069	212.111	147.399	180.964	328.651	138.769	159.437	356.384	224.771	204.7
ENSRNOT00000083859	0	0	0	0	0	0	0	0	0	0	0	0
ENSRNOT00000083869	0	0	0	0	0	0	0	0	0	0	0	0
ENSRNOT00000083870	0	1.51262	0	0	0	0	0	0	0	0	0	0
ENSRNOT00000083875	0	0	0	0	0	0	0	0	0	0	0	0
ENSRNOT00000083877	3.49215	24.4004	6.62629	12.677	12.2159	10.0769	15.3154	15.8392	19.4821	24.1993	18.7857	24.1501
ENSRNOT00000083880	28.7882	30.3061	28.3782	6.95034	13.1826	23.8353	19.8203	13.4945	20.0395	14.7984	19.5236	14.9292
ENSRNOT00000083887	0	1.20338	0	0	0	0	0	0	0	0	0	0
ENSRNOT00000083888	2.62949	0	2.49578	0	0	1.39996	1.28146	0	6.87504	0	0	1.34914
ENSRNOT00000083892	79.0289	7.78833	8.70562	6.37682	12.655	15.1653	2.52649	0	35.507	56.6111	0	4.29568
ENSRNOT00000083914	0	0	0	0	0	0	0	0	0	0	0	0
ENSRNOT00000083919	45.6756	58.9603	38.9955	74.9894	35.4239	36.6634	76.2802	70.8238	72.2432	66.5598	85.7757	96.4921
ENSRNOT00000083921	0	0	0	0	0	0	0	0	0	0	0	0
ENSRNOT00000083922	0	0	0	0	0	0	0	0	0	0	0	0
ENSRNOT00000083923	25.044	6.92116	15.4078	9.16283	17.1069	18.7134	4.5216	20.3157	16.4598	15.2814	10.7249	12.0558
ENSRNOT00000083929	0	0	0	0	0	0	0	0	0	0	0	0
ENSRNOT00000083930	0	0	0	0	0	0	0	0	0	0	0	0
ENSRNOT00000083936	0	0	0	0	0	0	0	0	0	0	0	0
ENSRNOT00000083950	3.39463	0	0.803145	0	0	2.74139	0.908529	0.845238	7.83886	0	1.86152	0.871023
ENSRNOT00000083953	0	0	0	0	0	0	0	0	0	0	0	0
ENSRNOT00000083958	0	0	0	0	0	0	0	0	0	0	0	0
ENSRNOT00000083960	2.36312	0	0	0	0	0	0	0	2.04935	1.99989	0	0
ENSRNOT00000083963	0	0	0	0	0	0	0	0	0	0	0	0
ENSRNOT00000083969	0	0	0	0	0	0	0	0	0	0	0	0
ENSRNOT00000083972	0	0	0	0	0	0	0	0	0	0	0	0
ENSRNOT00000083973	0	0	0	0	0	0	0	0	0	0	0	0
ENSRNOT00000083974	4.56445	12.2941	10.8593	9.43932	14.7955	15.6639	6.1518	9.4058	13.901	8.33677	10.839	19.4131
ENSRNOT00000083975	0	0	1.45869	2.33744	0	2.46712	0	0	1.34956	0	0	1.19101
ENSRNOT00000083978	0	0	0	0	0	0	0	0	0	0	0	0
ENSRNOT00000083980	0	0	0	0	0	0	2.69885	0	0	0	0	0
ENSRNOT00000083981	0	0	0	0	0	0	0	3.50249	0	0	0	0
ENSRNOT00000083984	0	0	0	0	0	0	0	0	0	0	0	0
ENSRNOT00000083989	0	0	0	3.16852	0	0	2.19781	0	0	0	0	0
ENSRNOT00000083998	0	0	0	0	0	0	0	0	0	0	0	0
ENSRNOT00000083999	0	0	0	0	0	0	0	0	0	0	0	0
ENSRNOT00000084001	0	0	0	0	0	0	0	0	0	0	0	0
ENSRNOT00000084008	0	0	0	0	0	0	0	0	0	0	0	0
ENSRNOT00000084010	0	0	0	2.7338	0	0	0	0	0	0	0	0
ENSRNOT00000084014	0	0	0	0	0	0	0	0	0	0	0	0
ENSRNOT00000084015	7.96912	59.2533	26.6652	35.6235	13.9961	28.2576	20.0777	43.395	39.4691	46.8266	42.7434	26.6762
ENSRNOT00000084024	3181.74	4179.25	2461.05	2989.03	3356.45	4879.15	3590.48	3554.49	4408.04	4795.51	4274.67	4528.71
ENSRNOT00000084025	0	0	0	0	0	0	0	0	0	0	0	0
ENSRNOT00000084029	4.00999	0	0	0	0	0	0	0	0	0	0	4.46828
ENSRNOT00000084033	0	0	0	0	0	0	0	0	0	0	0	0
ENSRNOT00000084039	0	0	0	0	0	0	0	0	0	1.68619	0	3.30385
ENSRNOT00000084042	219.549	150.407	148.404	212.532	186.839	180.967	210.155	167.007	152.93	198.465	222.041	256.191
ENSRNOT00000084047	6.62833	8.24528	10.1347	3.39284	7.54499	6.85563	8.95841	8.29752	6.71733	6.77196	4.65834	5.74882
ENSRNOT00000084051	0	0	0	0	0	0	0	0	0	0	0	0
ENSRNOT00000084059	23.8107	53.2574	31.5096	43.7131	37.3935	31.4593	50.2371	43.6299	42.8634	39.1818	46.7169	42.8413
ENSRNOT00000084061	0	0	0	0	0	0	0	0	0	0	0	0
ENSRNOT00000084074	0	0	0	0	0	0	0	0	0	0	0	0
ENSRNOT00000084077	0	0	0	0	0	0	0	0	0	0	0	0
ENSRNOT00000084080	16.4884	3.6622	2.05369	0	0	15.5625	0	2.19001	24.2134	2.01668	0	1.78322
ENSRNOT00000084081	0	0	0	0	0	0	0	0	0	0	0	0
ENSRNOT00000084083	0	0	0	0	0	0	0	0	0	0	0	0
ENSRNOT00000084087	0	0	0	0	0	0	0	0	0	0	0	0
ENSRNOT00000084097	0	0	0	0	0	0	0	0	0	0	0	0
ENSRNOT00000084104	0	0	0	0	0	0	0	0	0	0	0	0
ENSRNOT00000084119	1533.21	747.286	943.882	896.626	1091.19	1093.68	1160.91	1203.02	1104.57	1237.27	1004.05	1118.18
ENSRNOT00000084136	37.5624	118.174	71.6144	53.189	120.621	63.7263	76.4539	39.0822	78.5723	82.0413	53.2349	101.187
ENSRNOT00000084139	0	0	0	0	0	0	0	0	0	0	0	0
ENSRNOT00000084146	0	0	0	0	0	0	0	0	0	0	0	0
ENSRNOT00000084152	0	0	0	0	0	0	0	0	0	0	0	0
ENSRNOT00000084160	1.49611	5.05881	0.625327	1.56254	0	3.35368	1.32525	2.44513	2.95955	2.25996	0.828736	2.33439
ENSRNOT00000084169	0	0	0	0	0.079216	0	1.12991	0	0	0.000185	0	0
ENSRNOT00000084174	0	0	0.825741	4.53441	1.46288	0.920529	0	1.74349	6.26671	0.926965	1.70335	6.01138
ENSRNOT00000084175	0	0	0	0	0	0	0	0	0	0	0	0
ENSRNOT00000084183	0	0	0	0	0	0	0	0	0	0	0	0
ENSRNOT00000084186	31.4422	40.085	27.5657	28.8208	30.5954	46.5104	39.4588	28.1867	52.3397	41.2551	44.8849	41.3673
ENSRNOT00000084187	0	0	0	0	0	0	0	0	0	0	0	0
ENSRNOT00000084188	0	0	0	0	0	0	0	0	0	0	0	0
ENSRNOT00000084210	0	0	0	0	0	0	0	0	0	0	0	0
ENSRNOT00000084225	0	0	0	0	0	0	0	0	0	0	0	0
ENSRNOT00000084227	0	0	0	0	0	0	0	0	0	0	0	0
ENSRNOT00000084228	0	0	0	0	0	0	0	0	0	0	0	0
ENSRNOT00000084235	0	0	0	0	0	0	0	0	0	0	0	0
ENSRNOT00000084237	0	0	0	0	0	0	0	0	0	0	0	0
ENSRNOT00000084239	0	0.898767	0	0	0	0	0	0	2.3917	4.64269	4.89629	0
ENSRNOT00000084241	0	0	0	0	0	0	0	0	0	0.920306	0.954774	0
ENSRNOT00000084244	0	0	0	0	0	0	0	0	0	1.63934	0	3.24424
ENSRNOT00000084245	0	0	0	0	0	0	0	0	0	0	0	0
ENSRNOT00000084248	0	0	0	0	0	0	0	0	0	0	0	0
ENSRNOT00000084249	0	0	0	0	0	0	0	0	0	0	0	0
ENSRNOT00000084250	0	0	0	0	0	0	0	0	0	0	0	0
ENSRNOT00000084251	0	0	0	0	0	0	0	0	0	1.85967	0	0
ENSRNOT00000084252	0	0	0	0	0	0	0	0	0	0	0	0
ENSRNOT00000084257	0	0	0	0	0	0	0	0	0	0	0	0
ENSRNOT00000084263	69.0452	110.457	81.737	155.467	210.132	275.764	141.057	162.593	184.732	225.746	156.093	158.146
ENSRNOT00000084264	0	0	0	0	0	0	0	0	0	0	0	0
ENSRNOT00000084265	0	0.000663	4.17669	7e-06	0	0	0	0.997158	0	3e-05	3.4e-05	0
ENSRNOT00000084269	0	0	0	0	0	0	0	0	0	0	0	0
ENSRNOT00000084273	0	0	0	0	0	0	0	0	0	0	0	0
ENSRNOT00000084285	0	0	0	0	0	0	0	0	0	0	0	0
ENSRNOT00000084305	66.739	54.8633	29.8607	70.0885	112.404	46.0083	61.1821	31.3251	85.2432	54.1594	79.5441	67.8677
ENSRNOT00000084323	0	0	0	0	0	0	0	0	3.14028	0	0	0
ENSRNOT00000084325	0	0	0	0	0	0	0	0	0	0	0	0
ENSRNOT00000084327	0	0	0	0	0	0	0	0	0	0	0	0
ENSRNOT00000084328	0	0	0	0	0	0	0.752341	0	0	0	0	0
ENSRNOT00000084329	2.92189	0	0	0	0	1.34307	0	0	0	0	0	0
ENSRNOT00000084334	73.8401	114.911	84.4659	68.0669	90.1352	88.5542	76.5026	60.8706	82.4776	95.7987	89.4456	118.965
ENSRNOT00000084335	0	0	0	0	0	0	0	0	0	0	0	0
ENSRNOT00000084345	0	0	0	0	0	0	0	0	2e-06	0	0	0
ENSRNOT00000084356	12.9373	2.96269	6.75673	16.3326	6.60703	2.1056	10.0654	9.78702	15.291	14.6235	5.35051	5.48964
ENSRNOT00000084357	0	0	0	0	0	0	0	0	0	0	0	0.33206
ENSRNOT00000084358	0	0	0	0	0	0	0	0	0	0	0	0
ENSRNOT00000084363	0	0	0	0	0	0	0	0	0	0	0	0
ENSRNOT00000084370	0	0	0	0	0	0	0	0	0	0	0	0
ENSRNOT00000084371	0	0	0	0	0	0	0	0	0	0	0	0
ENSRNOT00000084373	13.767	0.10558	0.017621	0	0	16.3887	0	2.28727	23.2282	10.3201	0.743188	0
ENSRNOT00000084379	5.41641	1.34613	2.61555	0	0	5.21796	1.33963	5.26645	5.28879	0	0	0
ENSRNOT00000084382	0	2.67154	1.3e-05	2.67722	5.10138	1.33624	0.998966	3.68195	0.915762	1.77848	2.69305	8.00268
ENSRNOT00000084383	0	0	0	0	0	0	0	0	0	0	0	0
ENSRNOT00000084386	0	3.68238	0	0	0	0	0	1.88909	1.83691	0	0	0
ENSRNOT00000084399	0	0	0	0	0	0	0	0	0	0	0	0
ENSRNOT00000084402	0	0	0	0	0	0	0	0	0	0	0	0
ENSRNOT00000084403	0	0	0	0	0	0	0	0	0	0	0	0
ENSRNOT00000084407	0	0	0	0	0	0	0	0	0	0	0	0
ENSRNOT00000084414	0	0	0	0	0	0	0	0	0	0	0	0
ENSRNOT00000084415	0	0	0	0	0	0	0	0	0	0	0	0
ENSRNOT00000084425	0	0	0	0	0	0	0	0	0	0	0	0
ENSRNOT00000084426	0	0	0	0	0	0	0	0	0	0	0	0
ENSRNOT00000084434	0	0	0	0	0	0	0	0	0	0	0	0
ENSRNOT00000084435	8.18144	23.9775	7.51884	4.25767	14.8685	4.29914	10.0861	20.1199	18.2921	6.38701	13.3826	17.6435
ENSRNOT00000084442	0	0	0	0	0	1.94227	0	0	0	0	0	0
ENSRNOT00000084448	0	0.041113	0	0	0	0	0.769611	0	0	0.797718	0	0
ENSRNOT00000084464	0.858323	4.03859	2.71901	1.8518	0	2.98479	1.93384	4.49849	2.89619	8.32376	0	1.80728
ENSRNOT00000084474	0.042239	0	0	0	0.003963	0	0	0	0	0.027079	0	0
ENSRNOT00000084485	0	0	0	0	0	0	0	0	0	0	0	0
ENSRNOT00000084492	0	0	0	0	0	0	0	0	0	0	0	0
ENSRNOT00000084508	0	0	0	0	0	0	0	0	0	0	0	0
ENSRNOT00000084512	0	0	0	0	0	0	0	0	0	0	0	0
ENSRNOT00000084513	0	0	4.17403	0	0	0	2.03274	0	0	0	0	0
ENSRNOT00000084522	0	0	0	0	0	0	0	0	0	0	0	0
ENSRNOT00000084525	0	0	0	0	0	0	0	0	0	0	0	0
ENSRNOT00000084534	0	0	2.53997	0	0	0	0	2.72327	0	0	0	0
ENSRNOT00000084537	0	0	0	0	0	0.264908	0	0	0	0.285909	0	0
ENSRNOT00000084544	0	0	0	0	0	0	0	0	0	0	0	0
ENSRNOT00000084549	0	0	0	0	0	0	0	0	0	0	0	0
ENSRNOT00000084551	0	0	0	0	0	0	0	0	0	0	0	0
ENSRNOT00000084561	0	0	0	0	0	0	0	0	0	0	0	0
ENSRNOT00000084565	0	0	0	0	0	0	0	0	1.89471	0	0	0
ENSRNOT00000084566	0	0	0	0	0	0	1.56889	0	0	0	0	0
ENSRNOT00000084573	0	0	0	0	0	0	0	0	0	0	0	0
ENSRNOT00000084574	0	0	0	0	0	0	0	0	0	0	0	0
ENSRNOT00000084584	0.623391	3.62377	0.682392	1.49573	0.739408	0.762278	0.753645	2.16669	0	0	1.53677	1.4703
ENSRNOT00000084593	8.94305	22.2126	19.6014	5.29133	12.845	21.9243	6.69441	5.75192	7.80279	11.7721	14.8098	28.191
ENSRNOT00000084598	0	2e-06	0	0	0	1.52727	0	0	0	0	0	0
ENSRNOT00000084603	0	0	0	0	0	0	0	0	0	0	0	0
ENSRNOT00000084609	0	0	0	0	0	0	0	0	0	0	0	0
ENSRNOT00000084627	30.4681	41.7238	27.6751	35.2668	58.918	46.6754	32.4597	47.3796	58.4007	63.0208	28.0195	37.4337
ENSRNOT00000084630	0	0	1.41955	0.001602	0	0.013119	1.8e-05	0.039457	0	0	1.6e-05	0.874916
ENSRNOT00000084631	0	0	0	0	0	0	0	0	0	0	0	0
ENSRNOT00000084641	0	0	0	0	0	0	0	0	0	0	0	0
ENSRNOT00000084649	0	0	0	0	0	0	4.76235	0	0	0	0	0
ENSRNOT00000084655	0	0	1.84655	0	0	0	0	1.88904	1.9046	0	1.84724	0
ENSRNOT00000084659	0	0	0	0	0	0	0	0	0	0	0	0
ENSRNOT00000084663	1.28039	0	1.33511	0	0.660204	0.786017	0	0	0.630729	0	0	0
ENSRNOT00000084669	0	0	0	0	0	0	0	0	0	0	0	0
ENSRNOT00000084675	0	0	0	0	0	0	0	0	0	0	0	0
ENSRNOT00000084676	0	1.05716	0	0	0	0	2.38882	0	0.091265	1.09925	0	1.01479
ENSRNOT00000084677	0	0	1.66657	0	0	0	0	0	0	0	0	0
ENSRNOT00000084688	0	0	0	0	0	0	0	0	0	0	0	0
ENSRNOT00000084690	13.4699	19.4452	6.4338	8.31662	2.90521	4.81001	3.86672	13.1068	7.54866	7.53734	9.98848	19.8163
ENSRNOT00000084692	0.782496	0	0	0	0	0	0	0	0	0.70491	0	0
ENSRNOT00000084699	6.69492	9.80544	3.94681	20.6625	21.324	22.2615	31.626	33.0782	41.9726	34.1247	44.0112	29.0091
ENSRNOT00000084701	84.0503	0.423428	22.1954	27.1742	20.4373	15.9011	24.6177	15.5702	13.2958	34.0179	8.08141	23.8691
ENSRNOT00000084705	0	0	0	0	0	0	0	0	0	0	0	0
ENSRNOT00000084711	0	0	0	0	0	0	0	0	0	0	0	0
ENSRNOT00000084712	90.4018	33.3586	60.5687	39.9333	78.503	53.9366	34.8323	104.483	145.784	63.5294	77.4099	96.1744
ENSRNOT00000084727	1100.86	666.18	833.895	1003.57	867.296	1039.18	1195.27	1101.04	1139	1304.74	1097.97	1138.96
ENSRNOT00000084731	0	0	0	0	0	0	0	0	0	0	0	0
ENSRNOT00000084733	10.2115	27.0136	8.25781	2.03238	7.7655	6.34867	10.6438	19.1422	132.956	163.509	94.0049	7.28138
ENSRNOT00000084741	0	0	0	0	0	0	0	0	0	0	0	0
ENSRNOT00000084743	4.94807	1.36037	2.69872	0	9.55895	2.74797	0	1.47503	2.72618	1.39071	4.12104	1.27875
ENSRNOT00000084744	0	0	1.27973	0.588827	1.36158	3.6233	0	1.33419	2.08274	1.24839	1.47341	1.29809
ENSRNOT00000084748	0	0	0	0	0.858921	0	0	0	0	0	0	0
ENSRNOT00000084750	0	0	0	0	0	0	0	0	0	0	0	0
ENSRNOT00000084752	0	0	0	0	0	0	0	0	0	0	0	0
ENSRNOT00000084754	0	0	0	0	0	0	0	0	0	0	0	0
ENSRNOT00000084767	0	0	0	0	0	0	0	0	0	0	0	0
ENSRNOT00000084779	6.2332	11.4577	12.6028	4.2636	3.83065	8.28746	6.77416	12.656	5.05816	14.0751	7.882	12.7786
ENSRNOT00000084781	0	0	0	0	0	0	0	0	0	0	0	0
ENSRNOT00000084783	0	0	0	0	0	0	0	0	0	0	0	0
ENSRNOT00000084790	8.97688	8.49507	5.52608	7.99416	5.94295	5.4077	12.3563	12.463	6.80284	8.0977	12.8418	13.6235
ENSRNOT00000084791	0	0	0	0	0	0	0	0	0	0	0	0
ENSRNOT00000084793	0	0	0	0	0	0	0	0	0	0	0	0
ENSRNOT00000084794	0	0	0	0	0	0	0	0	0	0	0	0
ENSRNOT00000084795	0	0	0	0	0	0	0	0	0	0	0	0
ENSRNOT00000084802	0	0	0	0	0	0	0	0	0	0	0	0
ENSRNOT00000084807	0	0	0	0	0	0	0	0	0	0	0	0
ENSRNOT00000084812	0	0	0	0	0	0	0	0	0.427551	0	0	0
ENSRNOT00000084814	0	0	0	0	0	2.90898	0	0	0	0	0	0
ENSRNOT00000084816	0	0	0	0	0	0	0	0	0	0	0	0
ENSRNOT00000084817	351.044	156.029	153.128	164.014	201.609	194.61	210.282	215.601	185.875	241.991	185.809	186.452
ENSRNOT00000084821	6.11854	0	0	0	0	0	1.81183	3.68556	5.48863	3.31247	1.71781	0
ENSRNOT00000084822	6.80394	0	3.43792	0	3.40815	0	3.82735	0	0	3.71227	0	0
ENSRNOT00000084827	0	0	0	0	0	0	0	0	0	0	0	0
ENSRNOT00000084830	6.68513	0	0	0	0	4.94925	0	0	0	0	0	4.64827
ENSRNOT00000084831	0	0	0	0	0	0	0	0	0	0	0	0
ENSRNOT00000084840	0	0	0	0	0	0	0	0	0	0	0	0
ENSRNOT00000084842	0	3.67437	0	0	0	0	0	2.03063	0	0	0	1.68874
ENSRNOT00000084849	0	0	0	0	0	0	0	0	0	0	0	0
ENSRNOT00000084854	2.3968	0.638292	0	0	0	0.694308	0	0	0	0.660289	0	0
ENSRNOT00000084857	3.99937	2.47459	2.71561	1.22803	1.48963	1.24808	0	1.41422	1.33615	6.59399	1.30159	3.81091
ENSRNOT00000084859	0	0	0	0	0	0	0	0	0	0	0	1.27035
ENSRNOT00000084862	0	0	0	0	0	0	0	0	0	0	0	0
ENSRNOT00000084874	18.3059	5.31533	9.91501	5.01403	12.6595	10.9983	8.01629	11.855	1.88282	7.13718	14.3414	23.366
ENSRNOT00000084878	0	0	0	0	0	0	0	0	0	0	0	0
ENSRNOT00000084883	0	2.6149	0	2.32875	0	0	0	0	0	0	2.46427	0
ENSRNOT00000084885	0	0	0	0	0	0	0	0	0	0	0	0
ENSRNOT00000084886	0	0	0	0	0	0	0	0	0	0	0	0
ENSRNOT00000084889	0	0	0	0	0	0	0	0	0	0	0	0
ENSRNOT00000084891	0	0	0	0	0	0	0	0	0	0	0.708061	0
ENSRNOT00000084893	0	0	0	0	0	0	0	0	0	0	0	0
ENSRNOT00000084894	0	5.4e-05	0	5.60015	0.001249	16.3611	1.73159	0	0	0.008496	0	17.5342
ENSRNOT00000084935	0	0	0	0	0	0	0	0	0	0	0	0
ENSRNOT00000084937	0	0	0	0	0	0	0	0	0	0	0	0
ENSRNOT00000084945	0	0	0	0	0	0	0	0	0	0	0	0
ENSRNOT00000084953	53.565	149.048	45.3129	47.5932	84.0019	94.1249	83.6302	94.5284	163.001	39.3898	52.0043	81.2888
ENSRNOT00000084954	0	0	0	0	0	0	0	0	0	0	0	0
ENSRNOT00000084956	0	0	4.07209	3.8573	2.08101	0	6.57103	4.34368	4.17777	0	2.13266	2.05429
ENSRNOT00000084961	1.20676	4.71405	4.03002	1.71207	1.11351	0.985877	2.09698	2.04597	0.507518	0.971566	1.02058	2.33576
ENSRNOT00000084962	0	0	1.74232	0	0	0	0	0	4.0636	0	0	4.05111
ENSRNOT00000084963	0	0	0	0	0	0	0	0	0	0	0	0
ENSRNOT00000084969	0	0	0	0	0	0	0	0	0	0	0	0
ENSRNOT00000084979	0	2.65074	7.77426	1.31116	0	0	0	0	7.08725	12.6086	0	1.3221
ENSRNOT00000084980	0	0.918981	0	0.89904	0	0	0	1.03944	0	1.95263	0	0
ENSRNOT00000084983	0	0	0	0	0	0	0	0	0	0	0	0
ENSRNOT00000084993	0	0	0	0	0	0	0	0	0	0	0	0
ENSRNOT00000084998	0	0	0	0	0	0	0	0	0	0	0	0
ENSRNOT00000085009	0	0	0	0	0	0	0	0	0	0	0	0
ENSRNOT00000085015	0	0	0	0	0	0	0	0	0	0	0	0
ENSRNOT00000085016	0	0	0	0	0	0	0	0	0	0	0	0
ENSRNOT00000085017	0	0	0	0	0	0	0	0	0	0	0	0
ENSRNOT00000085019	0	0	0	0	0	0	0	0	0	0	0	0
ENSRNOT00000085034	0	7.29675	4.41187	0.07272	2.17465	6e-06	2.01362	0.000954	6.24648	5.54322	0.000953	8.71266
ENSRNOT00000085035	0	0	0	0	0	0	0	0	0	0	0	0
ENSRNOT00000085046	0	0	0	0	0	0	0	0	0	0	0	0
ENSRNOT00000085055	0	0	0	0	0	0	0	0	0	0	0	0
ENSRNOT00000085056	0	0	0	0	0	0	0	0	0	0	0	0
ENSRNOT00000085058	0.910837	24.5903	7.05362	1.62091	2.65812	4.11272	13.8863	7.35726	37.9761	31.705	32.9473	19.5053
ENSRNOT00000085066	1.63255	0	0	0	0	0	0	0	0	0	0	0
ENSRNOT00000085075	0	0	0	0	0	0	0	0	0	0	0	0
ENSRNOT00000085077	0	0	0	0	0	0	0	0	0	0	0	0
ENSRNOT00000085080	0.22197	3.3e-05	0.166891	0.642149	0	0	0	0	0	0.589568	3.86691	0.880737
ENSRNOT00000085086	15.3288	3.39738	5.6744	0	1.36188	8.07387	0	3.0017	4.78383	6.20763	1.68428	1.61332
ENSRNOT00000085088	0	0	0	0	0	0	0	0	0	0	0	0
ENSRNOT00000085095	0	0	0	0	0	0	0	0	0	0	0	0
ENSRNOT00000085099	0	0	0	0	0	0	0	0	0	0	0	0
ENSRNOT00000085102	0	0	0	0	0	0	0	0	0	0	0	0
ENSRNOT00000085103	0	0.475235	0.189666	0	0	0	0	0	1.42731	0	0.48226	0
ENSRNOT00000085111	0	0	0	0	0	0	0	0	0	0	0	0
ENSRNOT00000085114	0	0	0	0	0	0	0	1.40015	0	0	0	0
ENSRNOT00000085119	0	0	0	0	0	0	0	0	0	0	0	0
ENSRNOT00000085143	0	0	0	0	0	0	0	0	0	0	0	0
ENSRNOT00000085147	39.9181	25.7562	32.5197	32.3814	53.6419	35.7056	43.7831	29.3121	54.4282	44.7714	58.2564	47.018
ENSRNOT00000085168	0	0	0	0	0	0	0	0	0	0	0	0
ENSRNOT00000085171	7.1506	0	1.19775	2.75682	2.51759	0	1.40278	1.34999	0	0	2.91634	2.72286
ENSRNOT00000085172	68.4512	52.6518	55.7353	54.7024	65.6128	75.1934	42.096	59.9301	65.7173	88.4731	62.837	70.9273
ENSRNOT00000085177	0	0	0	0	0	0	0.912259	0	0	0	0	0.486916
ENSRNOT00000085186	0	0	0	0	0	0	0	0	0	0	0	0
ENSRNOT00000085189	0	0	0	0	0	0	0	0	0	0	0	0
ENSRNOT00000085196	0	0	0	0	0	0	0	0	0	0	0	0
ENSRNOT00000085197	0	0	0	0	0	0	0	0	0	0	0	0
ENSRNOT00000085206	0	0	0	0	0	0	0	0	0	0	0	0
ENSRNOT00000085207	0	2.01616	0	0	0	0	2.14877	0	4.00327	3.96143	1.93891	0
ENSRNOT00000085215	0	0	0	0	0	0	0	0	0	0	0	0
ENSRNOT00000085217	177.404	114.642	112.919	81.869	110.124	98.5711	133.762	128.656	113.028	144.182	121.523	138.141
ENSRNOT00000085218	0	90.7026	0	0	0	9.23404	5.11369	9.67368	0	0	0	18.8104
ENSRNOT00000085220	0	0.000126	1e-06	0.021303	0.548559	0	0.05818	0.195891	0.048194	0.22798	0.006574	0
ENSRNOT00000085223	0	0	0	0	0	0	0	0	0	0	0	0
ENSRNOT00000085232	0	0	0	0	0	0	0	0	0	0	2.1e-05	0
ENSRNOT00000085238	0	0	0	0	0	0	0	0	0	2.51398	0	0
ENSRNOT00000085242	6.47538	0	2.8285	0	0	0	0	0	0	0	0	0
ENSRNOT00000085243	0	0	0	0	0	0	0	0	0	0	0	0
ENSRNOT00000085247	0	0	0	0	0	0	0	0	0	0	0	0
ENSRNOT00000085249	0	0	0	0	0	0	0	0	0	0	0	0
ENSRNOT00000085252	0	0	0	0	0	0	0	0	0	0	0	0
ENSRNOT00000085253	0.745182	1.73456	2.56827	0.429297	1.95949	6.58281	1.77915	0.029738	2.69217	8.71059	1.88706	9.87257
ENSRNOT00000085264	0	0	0	0	0	0	0	0	0	0	0	0
ENSRNOT00000085269	0	2.81745	3.63356	0	0	3.31602	9.79578	0	0	0	0	5.76146
ENSRNOT00000085271	0	0	0	0	0	0	0	0	0	0	0	0
ENSRNOT00000085281	11.8615	1.26575	2.65613	1.18392	1.47809	1.27948	1.38375	1.42968	5.32658	1.28949	0	0
ENSRNOT00000085283	0	0	0	0	0	0	0	0	0	0	0	0
ENSRNOT00000085284	0	0	0	0	0	0	0	0	0	0	0	0
ENSRNOT00000085288	0	0	0	0	0	0	0	0	0	0	0	0
ENSRNOT00000085289	50.7906	25.9647	53.8125	34.2893	34.057	51.0628	40.2891	39.7014	28.4928	50.1801	39.9923	36.5219
ENSRNOT00000085292	0	0	0	0	0	0	0.355734	0.316493	0	0	0	0.534135
ENSRNOT00000085296	0	0	0	0	0	0	0	0	0	0	0	0
ENSRNOT00000085297	0	1.7e-05	0	0	3.77499	1.78866	0	1.20777	0.001455	0	8.2e-05	0
ENSRNOT00000085298	0	0	0	0	0	0	0	0	0	0	0	0
ENSRNOT00000085307	1.70034	2.39382	1.05431	7.04846	0	1.21137	2.10097	1.07679	0	0	0	0
ENSRNOT00000085329	0	0	0	0	0	0	0	0	0	0	0	0
ENSRNOT00000085331	0	0	0	0	0	0	0	0	0	0	0	0
ENSRNOT00000085341	0	0	0.742013	0.345813	0	0	0	0	0	0.721844	0	1e-06
ENSRNOT00000085346	0	0	0	0	0	0	0	0	0	0	0	0
ENSRNOT00000085347	0	0	0	0	0	0	0	0	0	0	0	0
ENSRNOT00000085360	0	0	0	1.42597	0	4.31876	0	1.46153	0	1.49841	0	0
ENSRNOT00000085366	336.475	1006.66	404.075	442.218	442.292	816.69	382.858	390.584	511.586	632.641	576.891	696.101
ENSRNOT00000085367	0	0	0	0	0	0	0	0	0	0	0	0
ENSRNOT00000085370	0	0	0	0	0	0	0	0	0	0	0	0
ENSRNOT00000085383	54.8688	34.5632	21.8413	34.6424	27.4417	42.2566	32.7361	44.5879	28.2641	24.0834	32.8624	36.5287
ENSRNOT00000085384	23.3548	35.2157	47.068	8.41473	16.6048	25.0004	22.6593	23.2346	37.7614	12.2629	12.7231	48.0265
ENSRNOT00000085385	0	0	0	0	0	0	1.05917	0	0	0	0	0
ENSRNOT00000085396	134.182	113.333	254.061	88.4297	81.0126	106.807	115.743	232.565	125.035	182.991	125.556	128.898
ENSRNOT00000085398	1.58342	6.77717	3.533	0	0	2.19299	5.81875	1.87849	0	0	0	2.1667
ENSRNOT00000085399	0	0	0	0	0	0	0	0	0	0	0	0
ENSRNOT00000085400	0	0	0	0	0	0	0	0	0	0	0	0
ENSRNOT00000085401	1.7749	17.3983	9.66687	0	7.93759	7.62978	2e-06	6.62423	6.65404	1.64059	0	5.67648
ENSRNOT00000085407	118.912	278.554	208.822	400.531	275.008	315.57	299.18	295.823	305.687	358.539	342.756	359.155
ENSRNOT00000085411	0	0	0	0	0	0	0	0	0	0	0	0
ENSRNOT00000085412	0	0	0	0	0	0	0	0	0	0	0	0
ENSRNOT00000085415	0	0	0	0	0	0	0	0	0	0	0	0
ENSRNOT00000085419	2.71408	0	3.28136	0	0	0	0	0	0	0	0	0
ENSRNOT00000085423	0	0	0	0	0	0	0	0	0	0	0	0
ENSRNOT00000085430	546.533	390.734	387.345	287.813	362.047	364.672	318.167	362.962	376.068	397.401	348.677	350.732
ENSRNOT00000085432	0	0	0	0	0	0	0	0	0	0	0	0
ENSRNOT00000085438	0	0	0	0	0	0	0	0	0	0	0	0
ENSRNOT00000085441	0	0	0	0	0	0	0	0	0	0	0	0
ENSRNOT00000085442	2.11113	0	0	0	0	0	0	0	0	0	0	0
ENSRNOT00000085443	0	0	0	0	0	0	0	0	0	0	0	0
ENSRNOT00000085445	0	0	0	0	0	0	0	0	0	0	0	0
ENSRNOT00000085459	0	0	0	0	0	0	0	0	0	0	0	0
ENSRNOT00000085471	1.28345	0	2.50098	1.25082	3.84418	0	0	0	2.59347	1.27669	0	0
ENSRNOT00000085472	0	0	0	0	0	0	0	0	0	0	0	0
ENSRNOT00000085474	1223.71	1035.39	991.407	895.486	1122.4	1169.1	769.818	1007.91	981.868	1374.82	1249.31	1190.56
ENSRNOT00000085477	14.4257	10.871	16.5551	0	9.48108	0	4.31602	0	4.01018	7.61474	0	7.79182
ENSRNOT00000085478	11.977	26.2795	16.7442	10.1144	15.3967	17.2273	8.36725	12.2799	14.1843	11.1217	17.7872	13.2698
ENSRNOT00000085485	0	0	0	0	0	1.9404	0	0	0	0	0	0
ENSRNOT00000085491	0	0	0	0	2.74033	0	0	0	0	0	0	2.25038
ENSRNOT00000085492	375.182	165.509	301.057	186.968	258.968	218.002	210.767	292.877	262.935	252.328	244.62	218.316
ENSRNOT00000085494	0	0	0	0	0	0	0	0	0	0	0	0
ENSRNOT00000085495	0	0	0	0	0	0	0	0	0	0	0	0
ENSRNOT00000085500	0	93.2659	0	0	1e-06	0.015328	0	3.38445	0	0	0	0
ENSRNOT00000085503	0	0	0	0	0.525711	0	0	4.54637	0	0	0	0
ENSRNOT00000085504	0	0	0	0	0	0	0	0	0	0	0	0
ENSRNOT00000085506	0	0	0	0	0	0	0	0	0	0	0	0
ENSRNOT00000085513	0	0	0	0	0	0	0	0	0	0	0	0
ENSRNOT00000085515	0	0	0	0	0	0	0	0	7.87356	3.95636	0	0
ENSRNOT00000085522	0	0	0	0	0	0.400923	0	0	0	0	0	0
ENSRNOT00000085523	0	0	0	0	0	0	0	0	0	0	0	0
ENSRNOT00000085531	0	0.995494	0	0	0	0	0	0	1.12471	0	0	0
ENSRNOT00000085541	1.55086	0	0	0	0	0	0	0	0	0	0	0
ENSRNOT00000085546	0	0	0	0	0	0	0	0	0	0	0	0
ENSRNOT00000085549	0	0	0	0	0	0	0	0	0	0	0	0
ENSRNOT00000085550	636.309	246.435	318.117	362.284	545.628	350.597	492.96	514.766	436.893	506.777	518.735	412.287
ENSRNOT00000085553	4.24347	0	3.01962	13.9502	3.16138	6.20228	0	0	3.23856	12.1499	0	0
ENSRNOT00000085554	0	0	0	0	0	2.98675	0	0	3.25236	0	0	0
ENSRNOT00000085561	0	0	0	0	0	0	0	0	0	0	0	0
ENSRNOT00000085567	10.0839	2.25334	5.22341	2.13805	0	6.63105	0	2.70633	7.10173	2.33117	2.26811	0
ENSRNOT00000085572	0	0	0	0	0	0	0	0	0	0	0	0
ENSRNOT00000085586	5.06957	0	0	0	1.40922	0	0	0	0	0	0	0.65093
ENSRNOT00000085590	0	0	0	0	1.07223	0	0	0	0	0	0	1.40143
ENSRNOT00000085593	0	0	0	0	0	0	0	0	0	0	0	0
ENSRNOT00000085625	0	0	1.57804	0	0	0	0	0	0	0	0	1.3986
ENSRNOT00000085631	0	0	0	0	0	0	0	0	0	0	0	0
ENSRNOT00000085633	0	0	0	0	0	0	0	0	0	0	0	0
ENSRNOT00000085638	0	0	0	0	0	0	0	0	0	0	0	0
ENSRNOT00000085639	0	0	0	0	0	0	0	0	0	0	0	0
ENSRNOT00000085640	9.75422	51.1636	19.732	5.32996	14.0021	23.2424	34.8276	14.7543	149.908	117.967	82.9475	71.2439
ENSRNOT00000085641	0	0	0	0	0	0	0	0	0	0	0	0
ENSRNOT00000085660	0	0	0	0	0	0	0	0	0	0	0	0
ENSRNOT00000085667	0	0	0	0	0	0	0	0	0	0	0	0.461063
ENSRNOT00000085679	16.69	2.19746	2.40582	6.22283	0.006404	12.6724	17.2811	2.4513	0	19.073	0	2.04814
ENSRNOT00000085686	0	0	0	0	0	0	0	0	0	0	0	0
ENSRNOT00000085695	0	0	0	0	0	0	0	0	0	0	0	0
ENSRNOT00000085697	0	0	0	0	0	0	0	0	0	0	0	0
ENSRNOT00000085702	2.54377	1.15552	1.39424	2.40993	6.4569	2.49393	0	2.86753	5.07225	3.84468	1.30943	4.64243
ENSRNOT00000085706	0	0	0	0	0	0	0	0	0	0	0	0
ENSRNOT00000085711	0	0	0	0	0	0	0	0	0	0	0	0
ENSRNOT00000085713	9.01806	3.37129	6.30667	1.88208	14.5149	0	6.49364	4.11476	5.64888	8.83146	0	7.95601
ENSRNOT00000085722	0	0	0	0	0	0	0	0	1.48798	0	0	0
ENSRNOT00000085733	0	0	0	0	0	0	0	0	0	0	0	0
ENSRNOT00000085734	22.0862	25.8966	14.0452	10.637	7.37422	4.1203	13.5712	11.3816	5.84343	7.2138	14.4518	13.0129
ENSRNOT00000085739	0	0	0	0	0	0	0	0	0	0	0	0
ENSRNOT00000085742	0	0	0	0	0	0	0	0	0	0	0	0
ENSRNOT00000085748	0	0	0	0	0	0	0	0	0	0	0	0
ENSRNOT00000085751	0	0	1.15418	1.14619	1.35763	3.46665	1.24299	1.24261	1.21712	0	1.22409	1.15524
ENSRNOT00000085752	0	0	0	0	0	0	0	0	0	0	0	0
ENSRNOT00000085759	0	1.55275	1.82562	9.21012	4.09265	4.88941	0	0	1.75852	0	1.60488	1.57354
ENSRNOT00000085763	0	0	0	0	0	0	0	0	0	0	0	0
ENSRNOT00000085769	0	0	2.36256	1.06686	5.82348	0	0	0	1.13201	0	5e-06	0
ENSRNOT00000085782	30.2485	36.5759	26.2757	39.1772	35.3479	55.3176	38.6391	34.673	40.2123	41.9544	60.9333	59.9499
ENSRNOT00000085786	2.32982	3.9692	2.61119	1.25936	1.40389	0	1.32657	0	1.30237	0	0	1.30288
ENSRNOT00000085794	0	13.619	0	1.52414	0	8.2412	0	0	1.65401	0	0	3.21257
ENSRNOT00000085795	0	0	0	0	0	0	0	0	0	0	0	0
ENSRNOT00000085802	0	0	0	0	0	0	0	0	0	0	0	0
ENSRNOT00000085803	0	0	0	0	0	0	0	0	0	0	0	0
ENSRNOT00000085809	0	0	0	0	0	0	0	0	0	0	0	0
ENSRNOT00000085823	0	0	0	0	0	0	0	0	0	0	0	0
ENSRNOT00000085825	428.59	80.9662	135.453	86.4978	121.727	73.9807	99.68	154.326	109.63	111.894	108.826	114.843
ENSRNOT00000085828	0	0	0	0	0	0	0	0	0	0	0	0
ENSRNOT00000085833	0	0	1.22234	0.598478	0	0.005868	0	1.28107	1.77975	1.19432	1.15929	1.19306
ENSRNOT00000085837	0	0	0	0	0	0	0	0	0	0	0	0
ENSRNOT00000085839	168.11	132.123	124.548	123.021	172	167.965	147.564	198.201	192.53	206.321	178.4	176.523
ENSRNOT00000085846	0	0	0	0	0	0	0	0	0	0	0	0
ENSRNOT00000085850	8.69518	2.83827	6.22401	2.56319	0.797113	0.907604	3.31297	1.5441	5.95296	2.47258	3.68319	0.843218
ENSRNOT00000085851	0	0	0	0	0	0	0	0	0	0	0	0
ENSRNOT00000085858	0	0	0.011208	0	0	0	1.8117	0	0	0	0	0
ENSRNOT00000085860	52.7101	178.902	105.032	142.954	123.344	161.513	145.597	116.062	125.754	134.051	140.069	185.171
ENSRNOT00000085862	0	2.77519	1.49834	0	0	1.49924	3.46111	2.13758	0	0	0.724266	2.20567
ENSRNOT00000085866	0	8.41618	0	1.27707	0	0	0	0	1.40343	0	0	0
ENSRNOT00000085870	0	0	0	0	0	0	0	0	0	0	0	0
ENSRNOT00000085871	0	0	0	0	0	0	0	0	0	0	0	0
ENSRNOT00000085881	38.1666	119.872	70.4248	80.4825	76.4263	121.298	82.1861	66.3295	116.51	82.7726	90.5902	64.7319
ENSRNOT00000085889	14.5774	4.24817	3.27843	3.24345	7.23845	0	0	2.28039	1.13247	4.34372	1.12628	2.17127
ENSRNOT00000085903	0	0	0	0	0	0	0	0	0	0	0	0
ENSRNOT00000085916	0	0	0	0	0	0	0	0	0	0	0	0
ENSRNOT00000085926	0	0	0	0	0	0	0	0	0	0	0	0
ENSRNOT00000085930	24.7845	61.5175	58.9514	16.4424	23.0966	30.0633	25.9648	48.913	45.8293	50.6996	36.0718	43.444
ENSRNOT00000085934	0	0	0	0	0	0	0	0	0	0	0	0
ENSRNOT00000085939	12.3525	5.79014	21.7561	2.59878	13.1691	5.52546	14.9835	9.99037	18.8	20.9096	15.8778	8.08317
ENSRNOT00000085947	0	0	0	0	0	0	0	0	0	0	0	0
ENSRNOT00000085948	0	0	0	0	0	0	0	0	0	0	0	0
ENSRNOT00000085951	0	0	0	0	0	0	0	0	0	0	0	0
ENSRNOT00000085953	4.36675	3.63996	1.26544	1.16058	3.91718	4.86557	8.46015	1.23134	2.51256	7.43371	2.43434	4.52211
ENSRNOT00000085957	0	0	0	0	0	0	0	0	0	0	0	0
ENSRNOT00000085963	0	0	0	0	0	0	0	0	0	0	0	0
ENSRNOT00000085965	65.4975	159.288	82.0219	141.677	103.778	178.796	80.0675	114.304	122.25	157.642	175.815	195.071
ENSRNOT00000085970	0	0	0	0	0	0	0	0	0	0	0	0
ENSRNOT00000085982	0	0	0	0	0	0	0	0	0	0	0	0
ENSRNOT00000085989	0.946442	0	0	0	0	0	0	0	0	0	0	0
ENSRNOT00000085994	0	0	0	0	0	0	0	0	0	0	0	0
ENSRNOT00000086000	0	0	0	0	0	0	0	0	0	0	0	0
ENSRNOT00000086016	0	0	0	0	0	0	0	0	0	0	0	0
ENSRNOT00000086017	0	0	0	0	0	0	0	0	0	0	0	0
ENSRNOT00000086020	0	0	0	0	0	0	0	0	0	0	0	0
ENSRNOT00000086021	0	0	0	0	0	0	0	0	0	0	0	0
ENSRNOT00000086032	1256.37	2473.26	1682.44	1363.51	1758.99	1933.42	1648.68	1737.67	1936.89	1889.04	1789.13	1795.45
ENSRNOT00000086040	0	0	0	0	0	0	0	0	0	0	0	0
ENSRNOT00000086043	11.8214	13.3358	0.793145	1.50677	6.63763	5.84477	4.07622	7.17785	4.77335	11.5711	3.00564	3.79885
ENSRNOT00000086047	0	0	0	0	0	0	0	0	0	0	0	0
ENSRNOT00000086049	0	0	0	0	0	0	0	0	0	0	0	0
ENSRNOT00000086066	58.389	121.069	95.6079	49.3529	90.0203	86.6417	50.0746	91.1437	128.438	113.881	77.4561	77.6927
ENSRNOT00000086067	0	0	0	0	0	0	0	0	0	0	0	0
ENSRNOT00000086069	0	0	0	0	0	0	0	0	0	0	0	0
ENSRNOT00000086073	0	0	0	0	0	0	0	0	0	0	0	0
ENSRNOT00000086092	0	0	0	0	0	0	0	0	1.44413	1.41818	0	1.42286
ENSRNOT00000086100	0	0	0	0	0	0	0	0	0	0	0	0
ENSRNOT00000086111	0	0	0	0	0	0	0	0	0	0	0	0
ENSRNOT00000086128	25.4103	20.8615	23.1419	15.6269	25.1867	25.6787	19.5737	18.1933	33.9654	30.1362	23.9218	21.3622
ENSRNOT00000086135	2451.07	815.904	1350.2	1531.13	1828.58	1601.9	2071.06	1619.82	1397.69	1794.64	1440.43	1450.88
ENSRNOT00000086142	0	0	0	0	0	0	0	0	0	0	0	0
ENSRNOT00000086150	0	2.08415	0	0	0	0	0	0	0	0	0	0
ENSRNOT00000086155	44.958	10.0123	23.6813	2.50563	23.5266	6.7732	15.1387	21.3892	10.2775	20.6697	4.42801	8.2332
ENSRNOT00000086158	5.70529	0	0	0	0	0	3.66738	0	0	0	0	0
ENSRNOT00000086159	0	0	0	0	0	0	0	0	0	0	0	0
ENSRNOT00000086165	0	0	0	0	0	0	0	0	0	0	0	0
ENSRNOT00000086168	0	1.12519	0	1.29425	0	0	0	0	1.27169	0	0	0
ENSRNOT00000086171	0	1.58386	3.17505	0	3.23884	0	1.46172	3.03809	4.71835	0	0	7.62064
ENSRNOT00000086172	0	0	0	0	0	0	0	0	0	0	0	0
ENSRNOT00000086178	1172.6	2295.31	1464.49	3369.35	3042	3233.22	2784.99	2820.66	2119.86	2722.49	3297.72	3764.5
ENSRNOT00000086191	217.136	86.9171	92.4073	88.3999	133.706	125.567	119.125	107.854	90.4119	126.111	87.4746	93.5113
ENSRNOT00000086196	0	0	0	0	0	0	0	0	0	0	0	0
ENSRNOT00000086200	6.78565	0	5.63356	3.24816	2.32931	4.46188	2.19542	2.15414	4.56071	2.18422	4.60889	1.05885
ENSRNOT00000086202	0	0	0	0	0	0	4.76844	0	0	0	0	0
ENSRNOT00000086205	0	0	0	0	0	0	0	0	0	0	0	0
ENSRNOT00000086208	0	0	0	0	0	0	0	0	0	0	0	0
ENSRNOT00000086211	0	2.54432	0	0	0	2.5831	0	0	0	2.62821	5.36748	0
ENSRNOT00000086213	0	0	0	0	0	0	0	0	0	0	0	0
ENSRNOT00000086220	0	0	0	0	0	0	0	0	0	0	0	0
ENSRNOT00000086229	0	0	0	0	0	0	0	0	0	0	0	0
ENSRNOT00000086230	0	0	0	0	0	0	0	0	0	0	0	0
ENSRNOT00000086234	0	0	0	0	0	0	0	0	0	0	0	0
ENSRNOT00000086235	0	0	0	0	0	0	0	0	0	0	0	0
ENSRNOT00000086237	0	0	0	0	1.49063	0	0	0	0	0	0	0
ENSRNOT00000086246	8.14767	0	0	0	1.76556	0	4.32367	0.890714	1.01627	1.86312	4.02562	12.3815
ENSRNOT00000086253	0	0	0	0	0	0	0	0	0	0	0	0
ENSRNOT00000086257	0	1.41393	0	0	0	2.66805	0	0	1.25034	0	0	0
ENSRNOT00000086258	0	0	0	0	0	0	0	0	0	0	0	0
ENSRNOT00000086266	10.6542	3.26051	9.64751	9.1893	20.0469	1.62632	13.1849	13.0674	27.6193	14.2468	13.1581	9.2729
ENSRNOT00000086267	0	0	0	0	0	0	0	0	0	0	0	0
ENSRNOT00000086268	375.529	681.19	505.45	526.883	609.833	634.494	509.633	625.523	659.62	654.485	732.417	670.501
ENSRNOT00000086269	0	0	0	0	0	0	0	0	0	0	0	0
ENSRNOT00000086273	0.012885	1.7312	0.814465	1.42319	7.17946	0.82384	1.56641	8.34724	6.30079	6.56081	0.861671	0.852165
ENSRNOT00000086277	0	0	0	0	0	0	0	0	0	0	0	0
ENSRNOT00000086290	0	0	0	0	0	0	0	0	0	0	0	0
ENSRNOT00000086314	0	0	0	0	0	0	0	0	0	0	0	0
ENSRNOT00000086316	0	0	0	0	0	0	0	0	0	0	0	0
ENSRNOT00000086320	0	0	0	0	0	0	0	0	0	0	0	0
ENSRNOT00000086326	0	0	0	0	0	0	0	0	0	0	0	0
ENSRNOT00000086332	62.4605	28.5436	25.8735	44.8798	41.9276	70.6719	71.9203	43.3227	51.732	63.9667	72.3145	45.3651
ENSRNOT00000086333	0	0	0	0	0	0	0	0	0	0	0	0
ENSRNOT00000086339	0	0	0	0	0	0	0	0	0	0	0	0
ENSRNOT00000086341	0	0	0	0	0	0	0	0	0	0	0	0
ENSRNOT00000086346	0	0	0	0	0	0	1.51999	0	0	0	0	0
ENSRNOT00000086348	0	0	0	0	0	1.00303	0	0	0	0	0	0
ENSRNOT00000086351	0	0	0	0	0	0	0	0	0	0	0	0
ENSRNOT00000086353	0	0	0	0	0	0	0	0	0	0	0	0
ENSRNOT00000086356	0	0	0	0	0	0	0	0	0	0	0	0
ENSRNOT00000086361	1.80565	0	0	0	0	1.11003	0	1.02019	0	0	0	0
ENSRNOT00000086364	0	0	0	0	0	0	0	0	0	0	0	0
ENSRNOT00000086366	0.491013	0.083386	3.51068	3.63734	5.44285	9.73451	9.17788	0.635781	16.2927	7.64082	4.24786	1.54472
ENSRNOT00000086379	0	0	0	0	0	0	0	0	0	0	0	0
ENSRNOT00000086383	0	0	0	0	0	0	0	0	0	0	0	0
ENSRNOT00000086387	0	0	0	0	0	0	0	0	0	0	0	0
ENSRNOT00000086389	0	0	0	0	0	0	0	0	0	0	0	0
ENSRNOT00000086398	0	0	0	0	0	0	0	0	0	0	0	0
ENSRNOT00000086408	0	0	2.50967	0	0	0	0	0	0	0	0	0
ENSRNOT00000086410	0	0	0	0	0	0	0	0	0	0	0	0
ENSRNOT00000086411	0	0	0	0	0	0	0	0	0	0	0	0
ENSRNOT00000086415	0	0	0	0	0	0	0	0	0	0	0	0
ENSRNOT00000086416	0	2.92643	2.6302	4.03332	1.74084	0.884388	2.17675	1.52793	8.56806	9.68225	8.53525	1.48526
ENSRNOT00000086417	0	0	0	0	0	0	0	0	0	0	0	0
ENSRNOT00000086422	6.97013	0	0	0	0	0	0	0	2.23831	0	0	0
ENSRNOT00000086428	37.0033	26.8721	31.397	45.2998	67.2153	41.3823	35.8232	45.6615	33.7488	42.8883	28.474	32.3581
ENSRNOT00000086445	0	0	0	0	0	0	0	0	0	0	0	0
ENSRNOT00000086452	0	0	1.01049	0	0	1.81099	0	1.0087	0	0	0	0.289585
ENSRNOT00000086466	0	11.5405	10.5131	7.13889	6.27881	11.8056	10.3927	4.51366	14.8103	15.9499	14.6995	7.22079
ENSRNOT00000086475	0	0	0	0	0	0	0	0	0	0	0	0
ENSRNOT00000086478	18.8469	41.3437	22.8735	70.565	31.1283	60.8785	47.5079	40.5255	54.9618	80.4034	70.175	82.9503
ENSRNOT00000086486	0	0	0	0	0	0	0	0	0	0	0	0
ENSRNOT00000086487	0.000212	0.980585	0	0	0.943328	0	0	0.932946	1.57632	0	0	0
ENSRNOT00000086488	0.923169	3.58303	5.12999	5.30177	0	25.6794	1.31031	3.49243	17.7707	1.23248	4.13155	9.35729
ENSRNOT00000086490	110.73	86.6248	82.4395	38.1376	85.8627	69.3784	92.587	84.83	88.573	84.5114	76.8209	85.0089
ENSRNOT00000086493	0	0	2.11865	1.67654	0	0	0	0	0	1.85164	1.85032	0
ENSRNOT00000086494	0	0	0	0	0	0	0	0	0	0	0	0
ENSRNOT00000086499	0	0	0.498352	0	0	0	0	0	0	0	0	0
ENSRNOT00000086500	0	0	0	0	0	0	0	0	0	0	0	0
ENSRNOT00000086501	0	0	0	0	0	0	0	0	0	0	0	0
ENSRNOT00000086510	0	0	0	0	0	0	0	0	0	0	0	0
ENSRNOT00000086513	0	0	0	0	0	0	0	0	0	0	0	0
ENSRNOT00000086515	0	0	0.669798	0	0	0	0	0	0	0	0	0
ENSRNOT00000086516	0	0	0	0	0	0	0	0	0	0	0	0
ENSRNOT00000086518	0	0	0	0	0	0	0	0	0	0	0.899898	0
ENSRNOT00000086519	0	0	0	0	0	0	0	0	0	0	0	0
ENSRNOT00000086537	0	0	0	0	0	0	0	0	0	0	0	0
ENSRNOT00000086546	31.2732	66.9237	38.4425	51.1298	39.1649	47.7811	47.8626	58.0742	52.226	60.4012	60.3646	46.3367
ENSRNOT00000086551	0	0	0	0	0	0	0	0	0	0	0	0
ENSRNOT00000086565	0	0	0	0	0	0	0	0	0	0	0	0
ENSRNOT00000086567	0	0	0	0	0	0	0	0	0	0	0	5.35873
ENSRNOT00000086573	0	0	0	0	0	0	0	0	0	0	0	0
ENSRNOT00000086583	0	0	0	0	0	0	0	0	0	0	0	0
ENSRNOT00000086585	0	0	0	0	0	0	0	0	0	0	0	0
ENSRNOT00000086586	8.57706	0	14.4049	0	0	12.2714	0	19.5694	13.1231	7.65607	0	0
ENSRNOT00000086587	0	0	0	0	0	0	0	0	0	0	0	0
ENSRNOT00000086595	443.311	420.235	378.397	540.789	448.16	684.981	601.727	513.103	1108.17	1201.87	827.291	528.299
ENSRNOT00000086596	0	0	0	0	0	0	0	0	0	0	0	0
ENSRNOT00000086613	69.9953	57.3999	47.0597	40.2096	53.9801	41.9529	44.9013	55.4688	60.6205	52.2647	48.0881	51.6901
ENSRNOT00000086616	39.7996	103.3	35.8491	50.7452	83.1604	116.833	76.3851	50.6435	392.921	430.435	236.774	82.8811
ENSRNOT00000086617	3.08079	0	0	0	0	1.02078	0	0	1.05331	1.08804	1.04882	1.00162
ENSRNOT00000086618	0	0	0	0	0	0	0	0	0	0	0	0
ENSRNOT00000086620	19.6847	2.60915	18.4135	0.825352	21.9534	2.63859	9.05751	13.9276	8.7096	20.8122	10.4081	6.5061
ENSRNOT00000086624	0	0	0	0	0	0	0	0	0	0	0	0
ENSRNOT00000086630	135.402	97.1845	90.026	238.732	196.393	143.738	233.728	209.986	229.11	319.764	268.077	265.674
ENSRNOT00000086634	0	0	0	0	0	0	0	0	0	0	0	0
ENSRNOT00000086637	0	0	0	0	0	0	0	0	0	0	0	0
ENSRNOT00000086639	0	0	0	0	0	0	0	0	0	0	0	0
ENSRNOT00000086642	0.377273	3.55425	0	0	0	5.37771	4.02505	1.15118	20.9042	29.9455	9.23856	3.36561
ENSRNOT00000086643	2.45156	0	0	0	0	0	0	0	0	0	0	0
ENSRNOT00000086647	0	0	0	0	0	0	0	0	0	0	0	0
ENSRNOT00000086654	0	0	0	0	0	0	0	0	0	0	0	0
ENSRNOT00000086657	0	0	0	0	0	0	0	0	0	0	0	0
ENSRNOT00000086659	0	0	0	0	0	0	0	0	0	0	0	0
ENSRNOT00000086661	8.85985	0	1.71751	1.39104	1.93451	7.30186	5.09041	0	6.18548	4.51683	3.11084	5.81069
ENSRNOT00000086665	0	0	0	0	0	0	0	0	0	0	0	0
ENSRNOT00000086667	0	0	0	0	0	0	0	0	5.1952	0	0	0
ENSRNOT00000086668	0	0	0	0	0	0	0	0	0	0	0	0
ENSRNOT00000086672	0	0	0	1.19234	0	0	0	0	0	0	0	1.18775
ENSRNOT00000086676	0	1.72081	0	0	0	0	0	1.25227	1.63085	3.03507	0	0
ENSRNOT00000086688	0	0	0	0	0	0	0	0	0	0	0	0
[truncated: 13,914 more rows]

## Sheet: miRNA counts
miRNA_id	C-1	C-2	C-3	C-4	C-5	C-6	H-1	H-2	H-3	H-4	H-5	H-6	Sequence	Length
rno-let-7a-1-3p>rno-let-7c-2-3p	7710	5120	5155	5394	5209	4563	5406	4938	4892	4650	4929	4886	CTATACAATCTACTGTCTTTCC	22
rno-let-7a-2-3p	8	5	6	3	2	7	4	5	1	4	3	2	CTGTACAGCCTCCTAGCTTTCC	22
rno-let-7a-5p	285238	239741	307777	404302	362155	314367	299390	346316	443685	394495	512830	411090	TGAGGTAGTAGGTTGTATAGTT	22
rno-let-7b-3p	1634	751	827	786	927	856	899	818	908	788	1013	854	CTATACAACCTACTGCCTTCCC	22
rno-let-7b-5p	111448	127037	133685	155407	173599	165001	154788	151261	204384	211849	197929	200587	TGAGGTAGTAGGTTGTGTGGTT	22
rno-let-7c-1-3p	94	64	89	79	72	78	49	51	58	85	50	88	CTGTACAACCTTCTAGCTTTCC	22
rno-let-7c-5p	291811	480096	524574	646669	674082	624716	611227	537465	880223	864186	792779	839981	TGAGGTAGTAGGTTGTATGGTT	22
rno-let-7d-3p	13900	8768	10733	10851	11792	11892	11714	10950	10930	12408	12785	13006	CTATACGACCTGCTGCCTTTCT	22
rno-let-7d-5p	133197	102573	129978	127662	176707	130915	135391	109343	193320	170344	175790	184017	AGAGGTAGTAGGTTGCATAGTT	22
rno-let-7e-3p	306	346	337	342	429	318	384	282	349	385	379	307	CTATACGGCCTCCTAGCTTTCC	22
rno-let-7e-5p	29254	25782	30101	27882	40083	36415	30599	28867	45555	41740	47708	43558	TGAGGTAGGAGGTTGTATAGTT	22
rno-let-7f-1-3p	26	19	23	36	23	23	28	16	24	16	22	16	CTATACAATCTATTGCCTTCC	21
rno-let-7f-2-3p	3	5	1	4	5	5	9	6	3	7	3	5	CTATACAGTCTACTGTCTTTC	21
rno-let-7f-5p	809756	551829	677184	658921	739775	562993	641034	647106	906136	675652	806930	795791	TGAGGTAGTAGATTGTATAGTT	22
rno-let-7g-3p	0	4	1	0	0	1	2	3	0	0	0	0	CTGTACAGGCCACTGCCTTGC	21
rno-let-7g-5p	323702	178206	218605	161985	219776	155641	161446	155817	228035	188295	192556	186270	TGAGGTAGTAGTTTGTACAGTT	22
rno-let-7i-3p	106	132	129	80	82	100	91	69	77	101	72	88	CTGCGCAAGCTACTGCCTTGCT	22
rno-let-7i-5p	546462	514730	548353	534264	589142	497481	571653	618296	678397	704881	618514	640220	TGAGGTAGTAGTTTGTGCTGTT	22
rno-miR-1-3p	4937	6044	6600	8265	11105	20690	25536	17684	29891	11397	15651	18005	TGGAATGTAAAGAAGTGTGTAT	22
rno-miR-100-3p	0	0	0	0	3	0	0	0	0	1	0	0	CAAGCTTGTGTCTATAGGT	19
rno-miR-100-5p	135511	126994	132505	128682	127424	129966	124996	125623	116160	147461	118065	118770	AACCCGTAGATCCGAACTTGTG	22
rno-miR-101a-3p	4037	6013	5069	6474	4649	6126	5724	5934	3299	4497	3826	4378	TACAGTACTGTGATAACTGAA	21
rno-miR-101a-5p	7	14	11	10	6	7	6	6	11	7	8	15	TCAGTTATCACAGTGCTGATGC	22
rno-miR-101b-3p	871	940	904	806	798	1011	931	995	600	850	668	744	TACAGTACTGTGATAGCTGAA	21
rno-miR-101b-5p	0	0	0	0	0	0	0	0	1	0	0	0	TCGGTTATCATGGTACCGATGC	22
rno-miR-103-1-5p	0	1	0	0	0	0	0	0	0	1	0	0	GGCTTCTTTACAGTGCTGCCTTGT	24
rno-miR-103-3p	10382	7975	8227	7363	9079	6024	5853	5151	9167	7251	7306	6816	AGCAGCATTGTACAGGGCTATGA	23
rno-miR-106b-3p	921	804	812	763	908	1412	808	683	632	782	771	590	CCGCACTGTGGGTACTTGCTGC	22
rno-miR-106b-5p	177	257	171	177	223	439	164	93	180	163	146	149	TAAAGTGCTGACAGTGCAGAT	21
rno-miR-107-3p	3941	976	962	775	1198	659	1636	1242	860	1386	1600	624	AGCAGCATTGTACAGGGCTATCA	23
rno-miR-10a-3p	1250	812	1057	933	1395	1234	890	706	1195	1171	974	903	CAAATTCGTATCTAGGGGAATA	22
rno-miR-10a-5p	575216	361632	586852	453926	592778	362480	522389	633286	648586	621793	459053	453949	TACCCTGTAGATCCGAATTTGTG	23
rno-miR-10b-3p	110	167	191	228	217	147	157	111	187	215	166	143	ACAGATTCGATTCTAGGGGAA	21
rno-miR-10b-5p	115	141	153	243	266	192	250	261	222	294	213	199	CCCTGTAGAACCGAATTTGTGT	22
rno-miR-1188-5p	0	0	0	0	0	0	1	0	14	38	5	1	TGGTGTGAGGTTGGGCCAGGA	21
rno-miR-1193-3p	4	5	15	10	14	5	8	3	28	58	17	7	TAGGTCACCCGTTTTACTATCC	22
rno-miR-122-3p	0	2	5	0	0	4	0	1	1	0	2	3	AACGCCATCATCACACTAA	19
rno-miR-122-5p	921	4851	12346	5479	1819	24607	4080	6896	11342	3045	16014	19127	TGGAGTGTGACAATGGTGTTTG	22
rno-miR-1224	0	1	0	0	0	2	2	0	9	7	2	4	GTGAGGACTGGGGAGGTGGAG	21
rno-miR-122b	13	95	215	96	24	391	65	72	175	33	238	281	AACACCATTGTCACACTCCA	20
rno-miR-124-3p	1	15	5	2	1	3	11	4	81	121	24	9	TAAGGCACGCGGTGAATGCC	20
rno-miR-124-5p	0	2	0	0	0	0	0	0	3	2	0	0	CGTGTTCACAGCGGACCTTGAT	22
rno-miR-1247-3p	5	3	17	11	12	35	9	17	6	7	8	6	CGGGAACGTCGAGACTGGAGC	21
rno-miR-1247-5p	14	19	74	37	85	135	51	41	54	73	45	40	ACCCGTCCCGTTCGTCCCCGGA	22
rno-miR-1249	35	63	35	31	35	47	31	31	47	52	51	63	ACGCCCTTCCCCCCCTTCTTCA	22
rno-miR-125a-3p	446	336	452	446	596	527	463	405	511	573	583	618	ACAGGTGAGGTTCTTGGGAGCC	22
rno-miR-125a-5p	198279	116597	169423	143582	163874	144914	172649	131051	165757	165274	175958	164765	TCCCTGAGACCCTTTAACCTGTGA	24
rno-miR-125b-1-3p	4917	5985	5396	4943	5184	5183	3983	4800	3393	5359	3818	4485	ACGGGTTAGGCTCTTGGGAGCT	22
rno-miR-125b-2-3p	2128	2627	2655	2374	2262	2398	2317	2334	2143	2963	2179	2247	ACAAGTCAGGCTCTTGGGACCT	22
rno-miR-125b-5p	118925	169346	172996	156807	188361	179157	166423	128462	133205	172875	157654	163115	TCCCTGAGACCCTAACTTGTGA	22
rno-miR-126a-3p	300768	77969	131590	88578	130788	128137	107783	143214	130479	166588	113807	100890	TCGTACCGTGAGTAATAATGCG	22
rno-miR-126a-5p	2137	834	1387	970	1223	1292	919	880	1108	1341	1290	967	CATTATTACTTTTGGTACGCG	21
rno-miR-127-3p	772	2107	1858	613	1321	860	1507	1285	7242	15066	2905	1901	TCGGATCCGTCTGAGCTTGGCT	22
rno-miR-127-5p	7	12	5	5	6	6	10	5	27	60	12	7	CTGAAGCTCAGAGGGCTCTGATT	23
rno-miR-128-1-5p	1	3	0	1	3	3	0	1	3	2	0	0	CGGGGCCGTAGCACTGTCTGA	21
rno-miR-128-2-5p	0	3	0	0	0	0	0	0	2	1	0	0	GGGGGCCGATGCACTGTAAGA	21
rno-miR-128-3p	21618	28803	15474	13552	11981	20979	13796	13638	15208	20034	19997	17016	TCACAGTGAACCGGTCTCTTT	21
rno-miR-129-2-3p	11	4	8	0	0	0	2	1	27	32	22	1	AAGCCCTTACCCCAAAAAGCAT	22
rno-miR-129-5p	773	359	109	27	108	42	209	144	2972	4057	1008	351	CTTTTTGCGGTCTGGGCTTGC	21
rno-miR-1298	0	0	1	0	0	0	0	0	1	4	2	0	TTCATTCGGCTGTCCAGATGTA	22
rno-miR-1306-3p	29	13	2	21	12	12	10	23	18	14	20	17	GACGTTGGCTCTGGTGGTGATG	22
rno-miR-1306-5p	26	24	30	27	21	19	25	24	17	19	31	21	CCACCTCCCCTGCAAACGTCCA	22
rno-miR-130a-3p	162	239	210	224	261	238	217	167	208	242	225	255	CAGTGCAATGTTAAAAGGGCAT	22
rno-miR-130a-5p	3	7	2	5	4	3	2	1	5	2	5	6	GCTCTTTTCACATTGTGCTACT	22
rno-miR-130b-3p	2	3	3	1	5	20	1	0	2	0	3	0	CAGTGCAATGATGAAAGGGCAT	22
rno-miR-130b-5p	23	37	12	23	54	120	24	11	14	27	22	22	ACTCTTTCCCTGTTGCACTACT	22
rno-miR-132-3p	85	142	51	42	101	105	55	38	59	80	79	61	TAACAGTCTACAGCCATGGTCG	22
rno-miR-132-5p	228	220	111	137	183	250	183	138	203	285	186	152	ACCGTGGCTTTCGATTGTTACT	22
rno-miR-133a-3p	70	190	111	126	98	153	149	76	123	97	109	97	TTTGGTCCCCTTCAACCAGCTG	22
rno-miR-133a-5p	19	19	29	13	8	6	16	10	19	8	7	14	AGCTGGTAAAATGGAACCAAAT	22
rno-miR-133b-3p	28	43	73	14	52	39	18	17	53	48	39	19	TTTGGTCCCCTTCAACCAGCTA	22
rno-miR-133c	22	7	11	9	4	8	10	4	5	10	17	3	CAGCTGGTTGAAGGGGACCAA	21
rno-miR-134-3p	0	3	0	0	0	0	0	0	3	10	1	0	CTGTGGGCCACCTAGTCACCAA	22
rno-miR-134-5p	53	111	94	56	142	73	119	109	615	1023	248	165	TGTGACTGGTTGACCAGAGGGG	22
rno-miR-135a-3p	0	0	0	2	0	0	2	0	0	0	1	0	TGTAGGGATGGAAGCCATGAAA	22
rno-miR-135a-5p	6	8	5	9	7	15	6	7	11	15	14	6	TATGGCTTTTTATTCCTATGTGA	23
rno-miR-135b-3p	0	0	0	1	10	16	0	0	0	0	0	0	ATGTAGGGCTAAAAGCCATGGG	22
rno-miR-135b-5p	3	1	2	68	159	547	0	0	3	3	3	1	TATGGCTTTTCATTCCTATGTGA	23
rno-miR-136-3p	32	72	63	21	47	38	54	65	137	323	63	71	CATCATCGTCTCAAATGAGTCT	22
rno-miR-136-5p	8	9	16	6	15	5	14	9	32	50	10	4	ACTCCATTTGTTTTGATGATGGA	23
rno-miR-137-3p	0	7	0	0	0	1	0	2	37	53	10	7	TTATTGCTTAAGAATACGCGTAG	23
rno-miR-137-5p	3	2	1	2	0	0	4	1	14	39	2	4	ACGGGTATTCTTGGGTGGATAA	22
rno-miR-138-1-3p	0	4	2	0	1	3	0	1	8	6	4	0	CGGCTACTTCACAACACCAGGG	22
rno-miR-138-2-3p	1	5	4	0	3	1	4	1	22	43	8	6	GCTATTTCACGACACCAGGGT	21
rno-miR-138-5p	8	23	8	2	3	6	5	6	91	182	45	15	AGCTGGTGTTGTGAATCAGGCCG	23
rno-miR-139-3p	101	26	44	35	45	48	42	53	68	76	54	45	TGGAGACGCGGCCCTGTTGGAG	22
rno-miR-139-5p	4763	1019	2085	1281	1699	2077	1554	2076	2451	3050	1877	1945	TCTACAGTGCACGTGTCTCCAG	22
rno-miR-140-3p	14829	20527	13290	14180	15486	13990	12442	11210	8083	9441	11006	10913	TACCACAGGGTAGAACCACGG	21
rno-miR-140-5p	23138	26199	23642	26088	29319	22742	24746	18234	19409	19826	24228	21459	CAGTGGTTTTACCCTATGGTAG	22
rno-miR-141-3p	3	8	2	41	98	290	8	3	4	6	1	6	TAACACTGTCTGGTAAAGATGG	22
rno-miR-141-5p	5	2	0	0	4	4	2	0	1	0	0	4	TCCATCTTCCAGTGCAGTGTTG	22
rno-miR-142-3p	367	873	413	422	306	506	367	276	295	399	487	315	TGTAGTGTTTCCTACTTTATGGA	23
rno-miR-142-5p	67	244	144	126	77	171	127	54	65	93	108	83	CATAAAGTAGAAAGCACTACT	21
rno-miR-143-3p	8501828	10161899	9090926	10277005	9442486	10267294	10431212	10577960	9200758	8020071	8871597	8974497	TGAGATGAAGCACTGTAGCTCA	22
rno-miR-143-5p	3930	10346	6978	10353	6628	5854	8584	5716	4515	5638	5883	5160	GGTGCAGTGCTGCATCTCTGG	21
rno-miR-144-3p	43	321	140	352	69	284	355	91	85	136	291	130	TACAGTATAGATGATGTACT	20
rno-miR-144-5p	99	462	377	548	156	549	583	209	225	238	598	265	GGATATCATCATATACTGTAAGT	23
rno-miR-145-3p	11307	13370	11368	14402	12314	16487	14687	16557	11980	11333	13372	14174	GGATTCCTGGAAATACTGTTC	21
rno-miR-145-5p	25443	37151	27836	24255	32773	18484	21570	19350	30135	27263	29579	19053	GTCCAGTTTTCCCAGGAATCCCT	23
rno-miR-146a-3p	1	9	6	2	1	0	2	1	2	3	2	1	ACCTGTGAAGTTCAGTTCTTT	21
rno-miR-146a-5p	15550	8364	17747	8577	10234	8053	8257	9769	10537	14985	13011	11583	TGAGAACTGAATTCCATGGGTT	22
rno-miR-146b-3p	2	5	1	4	0	4	1	1	0	2	0	0	CCTAGGGACTCAGTTCTGGTG	21
rno-miR-146b-5p	9190	8927	8079	5899	10412	8377	7872	6871	9497	14813	9493	7427	TGAGAACTGAATTCCATAGGCTGT	24
rno-miR-147	69	36	19	24	42	25	25	55	34	21	32	31	GTGTGCGGAAATGCTTCTGCTA	22
rno-miR-148a-3p	1974	1364	1672	1190	1353	1310	1174	1464	943	1281	727	990	TCAGTGCACTACAGAACTTTG	21
rno-miR-148a-5p	2823	1053	2033	956	1430	1017	1274	1759	968	1586	589	917	AAAGTTCTGAGACACTCTGACTC	23
rno-miR-148b-3p	6191	4474	4891	3982	4879	4686	4013	6087	4111	5227	3599	3698	TCAGTGCATCACAGAACTTTGT	22
rno-miR-148b-5p	85	88	80	89	96	85	76	79	72	83	70	59	GAAGTTCTGTTATACACTCAGG	22
rno-miR-149-5p	2112	2782	3130	3080	2876	3297	3052	2553	3689	5513	3396	3604	TCTGGCTCCGTGTCTTCACTCCC	23
rno-miR-150-3p	2	0	1	0	3	0	1	0	2	0	0	2	CTGGTACAGGCCTGGGGGA	19
rno-miR-150-5p	5152	2704	4156	1490	3313	2794	1954	2573	3129	3860	2564	2188	TCTCCCAACCCTTGTACCAGTG	22
rno-miR-151-3p	13586	7401	9027	7586	8872	9989	8541	11557	7344	10539	8004	8232	CTAGACTGAGGCTCCTTGAGG	21
rno-miR-151-5p	7	6	2	1	4	17	3	3	6	8	6	7	TCGAGGAGCTCACAGTCTAGT	21
rno-miR-152-3p	11515	21884	17189	21098	17566	16992	17382	15095	12882	14799	14315	14845	TCAGTGCATGACAGAACTTGG	21
rno-miR-152-5p	159	148	159	144	122	137	119	113	140	109	131	98	AGGTTCTGTGATACACTCCGACT	23
rno-miR-153-3p	3	0	3	0	7	8	2	0	6	15	1	0	TTGCATAGTCACAAAAGTGATC	22
rno-miR-153-5p	0	1	0	2	0	0	0	0	1	1	0	0	GTCATTTTTGTGATGTTGCAGCT	23
rno-miR-154-3p	0	2	0	0	0	1	0	0	2	4	6	2	AATCATACACGGTTGACCTATT	22
rno-miR-154-5p	3	3	4	6	2	0	0	3	5	16	4	2	TAGGTTATCCGTGTTGCCTTCG	22
rno-miR-155-3p	7	10	5	1	13	14	3	14	12	3	2	6	CTCCTACCTGTTAGCATTAAC	21
rno-miR-155-5p	1638	1354	1154	1075	1562	1161	1064	793	1553	1101	1440	1473	TTAATGCTAATTGTGATAGGGGT	23
rno-miR-15a-3p	0	0	0	0	0	0	0	0	0	1	0	0	AGGCCATATTGTGCTGCCTCA	21
rno-miR-15a-5p	0	2	1	1	4	1	2	1	2	2	2	8	TAGCAGCACATAATGGTTT	19
rno-miR-15b-3p	64	97	59	112	77	142	61	27	62	68	104	60	CGAATCATTATTTGCTGCTCTA	22
rno-miR-15b-5p	91	131	96	105	93	152	97	39	66	94	109	83	TAGCAGCACATCATGGTTTACA	22
rno-miR-16-3p	4	4	3	5	12	18	7	0	3	1	1	3	ACCAATATTATTGTGCTGCTT	21
rno-miR-16-5p	5274	4731	4361	4749	5004	4920	4232	3320	4606	4318	5265	4664	TAGCAGCACGTAAATATTGGCG	22
rno-miR-17-1-3p	6	16	8	12	15	14	5	7	7	5	11	3	ACTGCAGTGAAGGCACTTGTGG	22
rno-miR-17-2-3p	5	11	11	2	1	0	0	5	17	33	16	8	ACTGCACTGCAAGCACTTCTTAC	23
rno-miR-17-5p	171	191	119	209	451	1014	95	73	100	120	124	79	CAAAGTGCTTACAGTGCAGGTAG	23
rno-miR-181a-1-3p	138	207	147	154	184	188	153	126	132	163	146	144	ACCATCGACCGTTGATTGTACC	22
rno-miR-181a-2-3p	25	14	18	6	8	20	16	9	12	7	13	19	ACCACCAACCGTTGACTGT	19
rno-miR-181a-5p	52648	68845	53961	63405	54194	69351	55832	50234	56637	67414	59055	62221	AACATTCAACGCTGTCGGTGAGT	23
rno-miR-181b-1-3p	4	7	3	7	5	6	5	3	1	8	1	8	CTCACTGAACAATGAATGCAA	21
rno-miR-181b-2-3p	1	0	2	1	2	4	1	0	0	1	2	2	CTCACTGGTCAATGAATGCAAA	22
rno-miR-181b-5p	9600	13226	10137	12488	11104	13604	10866	8628	10741	12059	12037	13037	AACATTCATTGCTGTCGGTGGGT	23
rno-miR-181c-3p	39	36	19	14	23	53	18	31	16	32	19	26	ACCATCGACCGTTGAGTGGACC	22
rno-miR-181c-5p	350	276	238	233	164	257	188	149	258	411	230	199	AACATTCAACCTGTCGGTGAGT	22
rno-miR-181d-3p	0	0	0	0	1	1	1	0	0	0	0	1	CCACCGGGGGATGAATGTCA	20
rno-miR-181d-5p	1192	1031	922	792	825	1030	685	770	1127	1472	869	803	AACATTCATTGTTGTCGGTGGGT	23
rno-miR-182	56	81	152	177	509	1323	123	97	331	269	207	204	TTTGGCAATGGTAGAACTCACACCG	25
rno-miR-183-3p	0	0	0	0	2	10	1	0	2	0	0	3	TGAATTACCGAAGGGCCATAA	21
rno-miR-183-5p	52	87	143	94	269	756	148	76	313	355	205	256	TATGGCACTGGTAGAATTCACT	22
rno-miR-1839-3p	7	10	8	10	11	8	6	8	8	12	4	10	AGACCTACTTATCTACCAACAG	22
rno-miR-1839-5p	694	472	568	562	573	529	586	514	717	580	550	569	AAGGTAGATAGAACAGGTCTTG	22
rno-miR-184	156	11	9	2	13	7	16	12	25	50	11	6	TGGACGGAGAACTGATAAGGGT	22
rno-miR-1843a-3p	266	116	277	236	196	278	253	245	237	281	202	249	TCTGATCGTTCACCTCCATACA	22
rno-miR-1843a-5p	908	374	572	523	526	724	398	489	533	631	458	454	TATGGAGGTCTCTGTCTGACT	21
rno-miR-1843b-3p	4	3	8	7	4	5	5	5	6	8	5	6	TCTGATCGTTCCCCTCCATAC	21
rno-miR-1843b-5p	714	269	424	450	399	500	517	463	482	668	460	480	ATGGAGGTCTCTGTCTGACTTAG	23
rno-miR-185-5p	1101	1607	1287	1435	1471	1205	1462	990	1715	1471	1724	1386	TGGAGAGAAAGGCAGTTCCTGA	22
rno-miR-186-5p	6094	6305	5898	5907	5982	6108	5528	4756	4833	5566	5581	4884	CAAAGAATTCTCCTTTTGGGCT	22
rno-miR-187-3p	111	58	43	38	67	56	56	38	68	83	41	59	TCGTGTCTTGTGTTGCAGCCGG	22
rno-miR-188-5p	0	0	1	1	0	4	2	0	0	1	1	1	CATCCCTTGCATGGTGGAGGG	21
rno-miR-18a-3p	3	4	0	1	2	3	4	0	0	0	7	1	ACTGCCCTAAGTGCTCCTTCT	21
rno-miR-18a-5p	2	19	14	16	27	78	10	2	0	7	10	2	TAAGGTGCATCTAGTGCAGATAG	23
rno-miR-190a-3p	2	1	0	0	0	0	0	0	0	0	0	0	ACTATATATCAAGCATATTCCT	22
rno-miR-190a-5p	35	14	14	26	15	13	18	10	13	17	15	14	TGATATGTTTGATATATTAGGT	22
rno-miR-190b-5p	2	0	3	2	5	6	3	0	0	3	1	5	TGATATGTTTGATATTAGGTT	21
rno-miR-191a-3p	268	209	196	186	224	252	214	191	190	173	193	210	GCTGCACTTGGATTTCGTTCCC	22
rno-miR-191a-5p	72883	66437	60135	50705	66567	60459	52217	41047	65806	66293	66368	59597	CAACGGAATCCCAAAAGCAGCTG	23
rno-miR-191b	34	28	30	30	26	34	40	17	25	20	22	28	GAACGAAATCCAAGTGCAGCT	21
rno-miR-192-3p	0	0	2	0	1	0	0	0	0	0	0	0	CTGCCAGTTCCATAGGTCACAG	22
rno-miR-192-5p	2031	2798	1852	2200	3747	7548	2526	1783	1825	1970	2346	2348	CTGACCTATGAATTGACAGCC	21
rno-miR-193a-3p	77	15	25	6	11	9	12	28	11	9	7	17	AACTGGCCTACAAAGTCCCAGT	22
rno-miR-193a-5p	2184	377	811	416	864	444	560	673	477	537	424	565	TGGGTCTTTGCGGGCAAGATGA	22
rno-miR-193b-3p	0	0	0	0	0	0	0	3	0	0	0	0	AACTGGCCCACAAAGTCCC	19
rno-miR-194-3p	4	1	2	4	8	6	0	0	1	1	3	3	CCAGTGGGGCTGCTGTTATCT	21
rno-miR-194-5p	1699	2097	1417	1614	2792	3688	1798	1341	1627	1767	2002	2118	TGTAACAGCAACTCCATGTGGA	22
rno-miR-1949	7	0	2	3	5	0	1	1	1	1	3	2	TATACCAGGATGTCAGCATAGTT	23
rno-miR-195-3p	2868	1404	2123	1724	1772	1722	1658	2309	1564	2412	1699	1632	CCAATATTGGCTGTGCTGCTCCA	23
rno-miR-195-5p	4267	2732	3501	3082	3487	2946	2862	2985	3362	3973	3560	3182	TAGCAGCACAGAAATATTGGC	21
rno-miR-1956-5p	3	5	4	5	4	8	1	4	2	2	5	2	AGTCCAGGGCTGAGTCAGCGGA	22
rno-miR-196a-3p	0	1	0	1	0	0	0	2	1	1	0	0	TCGGCAACAAGAAACTGCCTGA	22
rno-miR-196a-5p	252	10365	8125	13727	10041	11163	10171	7862	13327	9380	12993	13426	TAGGTAGTTTCATGTTGTTGGG	22
rno-miR-196b-3p	0	2	1	2	1	1	4	1	0	0	1	0	TCGACAGCACGACACTGCCTTCA	23
rno-miR-196b-5p	1254	8534	9249	11358	9948	9864	9604	10084	11235	9644	11892	11248	TAGGTAGTTTCCTGTTGTTGGG	22
rno-miR-196c-3p	0	2	2	1	2	1	0	0	3	2	1	3	ACAACAACACCAAACCACCTGA	22
rno-miR-196c-5p	6	57	41	81	79	64	75	53	77	83	64	90	TAGGTAGTTTCGTGTTGTTGGG	22
rno-miR-199a-3p	55441	95902	78651	91832	90016	76505	69748	49444	63841	74989	73332	74467	ACAGTAGTCTGCACATTGGTTA	22
rno-miR-199a-5p	11872	14598	13572	14711	15290	13009	13423	11121	10758	14130	12520	11975	CCCAGTGTTCAGACTACCTGTTC	23
rno-miR-19a-3p	30	43	30	54	88	163	39	32	29	40	36	27	TGTGCAAATCTATGCAAAACTGA	23
rno-miR-19a-5p	0	0	0	0	0	0	1	0	0	0	0	0	TCGTTTTGCATAGTTGCACT	20
rno-miR-19b-3p	83	61	70	85	173	253	54	35	75	80	75	40	TGTGCAAATCCATGCAAAACTGA	23
rno-miR-1b	64297	60681	64344	61050	66887	47511	74215	60548	98330	42131	70776	68434	TGGAATGTAAAGAAGTATGTAT	22
rno-miR-200a-3p	216	134	75	454	1128	2318	97	109	95	214	175	85	TAACACTGTCTGGTAACGATGT	22
rno-miR-200a-5p	0	1	3	3	24	30	3	0	0	4	0	0	CATCTTACCGGACAGTGCTGG	21
rno-miR-200b-3p	214	107	87	1441	4258	12264	87	116	129	247	243	179	TAATACTGCCTGGTAATGATGAC	23
rno-miR-200b-5p	3	2	6	18	49	137	2	3	3	1	3	4	CATCTTACTGGGCAGCATTGGA	22
rno-miR-200c-3p	27	24	23	125	241	605	19	15	23	57	44	33	TAATACTGCCGGGTAATGATG	21
rno-miR-200c-5p	0	0	0	0	1	0	0	0	0	0	0	0	CGTCTTACCCAGCAGTGTTTG	21
rno-miR-201-3p	1	0	0	0	0	0	0	0	1	0	0	0	TGAACAGCGCCTTTCTGTGTAG	22
rno-miR-201-5p	0	0	1	1	0	0	2	0	3	2	0	0	CACTCAGTAAGGCATTGTTC	20
rno-miR-203a-3p	14091	831	5080	826	3759	1652	2376	4265	2415	2711	954	1808	GTGAAATGTTTAGGACCACTAG	22
rno-miR-203a-5p	185	12	44	0	24	7	20	34	10	16	5	15	AGTGGTTCTTAACAGTTCAAC	21
rno-miR-203b-3p	2418	83	725	67	566	117	319	602	278	282	94	197	TTGAACTGTTAAGAACCACTGG	22
rno-miR-203b-5p	3258	167	1039	157	640	296	460	806	500	497	172	336	AGTGGTCCTAAACATTTCAC	20
rno-miR-204-3p	65	42	69	25	25	46	49	54	208	327	86	110	GCTGGGAAGGCAAAGGGACGTT	22
rno-miR-204-5p	2598	2664	3745	1857	1349	1988	3435	2746	10450	14833	5206	5517	TTCCCTTTGTCATCCTATGCCT	22
rno-miR-205	160	275	368	285	195	186	209	285	415	710	332	225	TCCTTCATTCCACCGGAGTCTGT	23
rno-miR-206-3p	751	722	853	455	683	967	1128	961	1120	780	752	826	TGGAATGTAAGGAAGTGTGTGG	22
rno-miR-208a-3p	0	0	0	0	0	0	0	0	0	0	1	0	ATAAGACGAGCAAAAAGC	18
rno-miR-208a-5p	1	0	0	0	0	1	0	0	0	2	0	0	GAGCTTTTGGCCCGGGTTATAC	22
rno-miR-20a-3p	0	2	0	0	0	0	0	0	0	0	0	0	ACTGCATTACGAGCACTTACA	21
rno-miR-20a-5p	376	384	291	429	895	1931	225	116	195	216	259	171	TAAAGTGCTTATAGTGCAGGTAG	23
rno-miR-20b-3p	1	1	2	0	0	0	0	0	0	1	0	0	ACTGCAGTGTGAGCACTTCTGG	22
rno-miR-20b-5p	6	10	5	2	6	1	4	1	14	27	9	9	CAAAGTGCTCATAGTGCAGGTAG	23
rno-miR-21-3p	16	17	10	22	39	36	6	4	5	7	7	9	CAACAGCAGTCGATGGGCTGTC	22
rno-miR-21-5p	155865	226405	143842	149305	187547	214362	164751	118365	120171	151221	136229	156894	TAGCTTATCAGACTGATGTTGA	22
rno-miR-210-3p	78	61	55	62	67	55	64	27	40	84	63	59	CTGTGCGTGTGACAGCGGCTGA	22
rno-miR-210-5p	1	2	1	1	0	0	2	0	0	0	0	2	AGCCACTGCCCACAGCACACTG	22
rno-miR-211-5p	12	7	26	4	11	12	16	18	8	15	24	13	TTCCCTTTGTCATCCTTTGCCT	22
rno-miR-212-3p	11	36	11	8	20	16	11	7	9	13	9	6	TAACAGTCTCCAGTCACGGCCA	22
rno-miR-212-5p	200	201	124	90	163	170	135	116	136	232	157	154	ACCTTGGCTCTAGACTGCTTACTG	24
rno-miR-214-3p	296	539	439	482	587	487	439	320	469	503	541	550	ACAGCAGGCACAGACAGGCAG	21
rno-miR-214-5p	0	3	0	0	0	1	2	0	0	0	0	1	AGAGTTGTCATGTGTCT	17
rno-miR-215	35	31	31	29	34	31	34	13	21	45	39	45	ATGACCTATGATTTGACAGACA	22
rno-miR-216a-3p	2	2	2	1	3	7	0	0	2	3	4	0	CACAGTGGTCTCTGGGATTATG	22
rno-miR-216a-5p	7	5	7	19	6	13	2	5	13	20	8	12	TAATCTCAGCTGGCAACTGTGA	22
rno-miR-216b-3p	0	0	0	0	0	0	0	1	0	0	0	0	CACACTTACTTGTAGAGATT	20
rno-miR-216b-5p	0	3	4	31	39	45	2	3	21	35	22	10	AAATCTCTGCAGGCAAATGTGA	22
rno-miR-217-3p	0	0	0	1	0	0	0	0	0	0	0	0	ATCAGTTCCTAATGCATTGCCT	22
rno-miR-217-5p	7	12	15	47	53	69	4	8	49	60	37	13	TACTGCATCAGGAACTGACTGG	22
rno-miR-218a-1-3p	0	5	0	0	1	2	0	1	3	0	0	1	AAACATGGTTCCGTCAAGCAC	21
rno-miR-218a-2-3p	1	0	0	3	0	1	1	0	0	0	0	3	CATGGTTCTGTCAAGCACCGCG	22
rno-miR-218a-5p	13842	14362	8330	8312	9098	10677	9763	8529	16315	28039	11760	10456	TTGTGCTTGATCTAACCATGT	21
rno-miR-218b	349	110	53	151	53	66	55	53	105	171	93	69	CATGGTTAGATCAAGCACAA	20
rno-miR-219a-1-3p	76	21	35	18	31	29	22	48	21	24	15	24	AGAGTTGCGTCTGGACGTCCCG	22
rno-miR-219a-2-3p	0	0	0	0	0	0	0	0	0	3	0	0	AGAATTGTGGCTGGACATCTGT	22
rno-miR-219a-5p	0	1	0	0	0	0	0	0	1	2	0	0	TGATTGTCCAAACGCAATTCT	21
rno-miR-219b	2	1	1	5	1	2	4	0	2	7	3	1	AGATGTCCAGCCACAATTCTCG	22
rno-miR-22-3p	133429	117437	106210	108341	123762	120589	109660	80718	100446	102850	98741	96230	AAGCTGCCAGTTGAAGAACTGT	22
rno-miR-22-5p	13333	9745	8495	9646	10483	11153	10296	7800	9380	9167	8435	9458	AGTTCTTCAGTGGCAAGCTTTA	22
rno-miR-221-3p	8510	11686	7403	7396	10307	9403	8134	4055	6722	7693	7202	8949	AGCTACATTGTCTGCTGGGTTTC	23
rno-miR-221-5p	206	291	176	169	204	247	192	114	153	205	133	203	ACCTGGCATACAATGTAGATTTC	23
rno-miR-222-3p	1591	2138	1276	1316	1449	2172	1641	913	1074	1270	1306	1653	AGCTACATCTGGCTACTGGGT	21
rno-miR-222-5p	2	0	0	0	0	0	0	0	0	0	0	0	GGCTCAGTAGCCAGTGTAGAT	21
rno-miR-223-3p	26	144	35	39	33	48	20	21	19	51	51	34	TGTCAGTTTGTCAAATACCCC	21
rno-miR-223-5p	80	163	66	73	83	84	54	70	50	92	86	82	CGTGTATTTGACAAGCTGAGTTG	23
rno-miR-224-3p	5	0	0	0	1	1	1	1	0	0	0	0	AAATGGTGCCCTAGTGACTACA	22
rno-miR-224-5p	1543	360	702	454	612	543	476	692	459	554	475	547	CAAGTCACTAGTGGTTCCGTTT	22
rno-miR-23a-3p	13604	33315	19290	19674	23655	19753	15793	11483	18725	19052	25016	18766	ATCACATTGCCAGGGATTTCC	21
rno-miR-23a-5p	16	9	12	7	23	24	6	4	12	6	5	9	GGGGTTCCTGGGGATGGGATTT	22
rno-miR-23b-3p	11391	26298	14811	20882	19587	21370	13426	12451	14957	17399	20800	16233	ATCACATTGCCAGGGATTACC	21
rno-miR-23b-5p	197	105	139	148	205	167	145	139	161	199	173	194	GGGTTCCTGGCATGCTGATTT	21
rno-miR-24-1-5p	963	1181	725	1122	1039	1287	1034	946	663	933	886	1034	GTGCCTACTGAGCTGATATCAG	22
rno-miR-24-2-5p	10334	10347	7739	8242	8735	10024	8743	9089	6543	8597	7838	7899	GTGCCTACTGAGCTGAAACAGT	22
rno-miR-24-3p	149919	155613	127171	151667	161397	170513	150068	130067	119700	150376	140146	144373	TGGCTCAGTTCAGCAGGAACAG	22
rno-miR-25-3p	9608	8684	9354	9111	9691	12959	8621	7243	8811	11005	9575	8922	CATTGCACTTGTCTCGGTCTGA	22
rno-miR-25-5p	0	0	1	0	1	2	4	1	2	3	2	4	AGGCGGAGACACGGGCAATTGC	22
rno-miR-26a-3p	0	2	0	2	0	0	5	0	4	0	0	0	CCTATTCTTGGTTACTTGCAC	21
rno-miR-26a-5p	2912652	2266570	2557310	2352469	2520606	2432924	2521041	2379923	2788160	2928410	2599234	2491562	TTCAAGTAATCCAGGATAGGCT	22
rno-miR-26b-3p	81	97	80	64	69	83	90	55	58	83	84	71	CCTGTTCTCCATTACTTGGCTC	22
rno-miR-26b-5p	58428	70022	61930	71957	62074	65548	62825	53078	66995	58371	73146	71632	TTCAAGTAATTCAGGATAGGT	21
rno-miR-27a-3p	221847	203794	157275	186590	165489	216722	171505	161349	133117	152662	166904	181694	TTCACAGTGGCTAAGTTCCGC	21
rno-miR-27a-5p	1021	989	1210	1103	1140	1070	506	698	426	932	521	688	AGGGCTTAGCTGCTTGTGAGCA	22
rno-miR-27b-3p	253282	333603	237834	278853	266026	359058	295950	267522	237582	238550	273554	286276	TTCACAGTGGCTAAGTTCTGC	21
rno-miR-27b-5p	892	1026	882	1094	1157	1257	1101	1150	1012	1023	1066	1081	AGAGCTTAGCTGATTGGTGAACAG	24
rno-miR-28-3p	2183	2167	2469	2375	2429	1898	2163	2025	2297	2237	2241	1852	CACTAGATTGTGAGCTCCTGGA	22
rno-miR-28-5p	2940	2413	2529	2585	2734	2791	2286	2282	2462	2560	2601	2236	AAGGAGCTCACAGTCTATTGAG	22
rno-miR-291a-3p	2	0	0	0	0	0	0	1	0	0	0	0	AAAGTGCTTCCACTTTGTGTGCC	23
rno-miR-291a-5p	0	0	0	0	0	0	0	0	3	0	0	0	CATCAAAGTGGAGGCCCTCTCT	22
rno-miR-291b	3	0	0	0	0	0	0	2	0	0	0	1	AAAGTGCATCCATTTTGTTAGT	22
rno-miR-292-3p	3	0	3	0	3	0	2	3	3	2	0	0	AAGTGCCGCCAGGTTTTGAGTGT	23
rno-miR-292-5p	7	0	7	0	1	1	2	9	2	4	1	0	ACTCAAACTGGGGGCTCTTTTG	22
rno-miR-293-5p	10	0	18	0	4	3	1	13	4	5	2	1	ACTCAAACTGTGTGACACTTT	21
rno-miR-295-3p	1	0	3	1	0	0	0	2	0	1	0	0	AAGTGCTACTACTTTTGGGTGT	22
rno-miR-296-3p	7	7	7	2	2	1	10	2	11	19	5	5	GAGGGTTGGGTGGAGGCTCTCC	22
rno-miR-296-5p	1	1	0	2	5	1	1	1	6	8	2	6	AGGGCCCCCCCTCAATCCTGT	21
rno-miR-298-3p	0	2	2	0	4	1	2	1	1	5	4	5	AGGAACTAGCCTTCTCTCTGCT	22
rno-miR-298-5p	1	12	22	6	15	11	29	16	68	100	34	29	GGCAGAGGAGGGCTGTTCTTCCC	23
rno-miR-2985	0	0	0	0	0	0	1	0	0	0	0	0	TGTTATAGTATCCCACCTACCC	22
rno-miR-299a-3p	3	11	4	0	2	2	4	2	9	22	4	6	TATGTGGGACGGTAAACCGCT	21
rno-miR-299a-5p	2	3	5	1	1	2	2	2	7	24	7	3	TGGTTTACCGTCCCACATACAT	22
rno-miR-299b-5p	0	0	1	0	0	0	0	0	0	2	0	1	CGGTTTACCGTCCCACATAC	20
rno-miR-29a-3p	18564	20275	14445	13990	16648	19674	14026	11067	13195	15137	14566	15003	TAGCACCATCTGAAATCGGTTA	22
rno-miR-29a-5p	8	11	7	7	5	4	5	8	4	10	3	5	ACTGATTTCTTTTGGTGTTCAG	22
rno-miR-29b-1-5p	0	0	0	0	0	0	0	0	0	0	1	0	TTTCATATGGTGGTTTAGATTT	22
rno-miR-29b-3p	510	809	667	504	581	722	745	324	463	669	784	607	TAGCACCATTTGAAATCAGTGTT	23
rno-miR-29b-5p	7	11	1	2	6	21	7	9	3	6	8	4	CTGGTTTCACATGGTGGCTTAG	22
rno-miR-29c-3p	496	659	241	499	517	704	227	338	391	204	274	571	TAGCACCATTTGAAATCGGTTA	22
rno-miR-29c-5p	122	129	95	80	94	96	89	84	70	95	81	72	TGACCGATTTCTCCTGGTGTTC	22
rno-miR-300-3p	25	69	60	21	43	26	60	49	225	404	110	89	TATGCAAGGGCAAGCTCTCTTC	22
rno-miR-301a-3p	4	8	4	6	7	13	15	5	7	13	3	4	CAGTGCAATAGTATTGTCAAAGC	23
rno-miR-301a-5p	16	14	11	7	6	11	8	8	7	9	6	8	GCTCTGACTTTATTGCACTAC	21
rno-miR-301b-3p	0	0	0	0	2	8	0	0	0	0	0	0	CAGTGCAATGGTATTGTCAAAGC	23
rno-miR-3064-3p	3	0	1	0	0	0	1	0	0	0	0	0	TTTGCCACACTGCAACACCTTACA	24
rno-miR-3064-5p	0	0	1	0	4	3	3	1	0	2	2	1	TGGCTGTTGTGGTGTGCAAA	20
rno-miR-3065-3p	33	25	32	8	13	19	24	14	90	99	31	47	TCAGCACCAGGATATTGTTGGGGA	24
rno-miR-3068-3p	128	77	86	62	97	75	89	77	71	57	66	63	GGTGAATTGCAGTACTCCAACA	22
rno-miR-3068-5p	308	271	273	317	359	315	324	279	268	312	260	278	TTGGAGTTCATGCAAGTTCTAACCA	25
rno-miR-3072	0	1	0	0	0	0	0	1	0	1	0	1	TGCCCCCTCCAGGAAGCCTTCTT	23
rno-miR-3074	674	655	554	526	614	680	635	547	551	561	576	596	GATATCAGCTCAGTAGGCACCG	22
rno-miR-3075	2	3	2	0	1	0	1	1	1	1	0	1	TGTCTGGGAGCAGCCAAGGACAAG	24
rno-miR-3084a-1-5p	7	1	0	2	0	0	1	0	1	2	1	2	TTGAAGGTTCATTAGCAGAGTA	22
rno-miR-3084a-3p	1	0	0	0	1	0	0	0	0	0	0	0	TTCTGCCAGTCCCCTTCAGACA	22
rno-miR-3084a-5p	7	3	4	1	7	9	2	3	15	13	4	2	GTTGAAGGTTAATTAGCAGAGT	22
rno-miR-3084b-5p	0	0	0	0	2	0	0	0	0	1	0	0	GTTGAAGGTTAATTAGCAGAG	21
rno-miR-3099	1	5	6	5	2	1	7	3	41	66	16	5	TAGGCTAGAAAGAGGTTGGGGA	22
rno-miR-30a-3p	12006	12447	12363	12233	13786	15356	13734	13128	13561	12591	14772	15939	CTTTCAGTCGGATGTTTGCAGC	22
rno-miR-30a-5p	51052	63035	51602	53594	50066	62921	54908	50113	38854	42627	49615	50493	TGTAAACATCCTCGACTGGAAG	22
rno-miR-30b-3p	691	267	332	191	317	278	218	335	322	335	271	280	CTGGGATGTGGATGTTTACGTC	22
rno-miR-30b-5p	1637	2721	1737	1518	1816	1767	1264	1262	1650	1748	1753	1165	TGTAAACATCCTACACTCAGCT	22
rno-miR-30c-1-3p	500	124	217	117	212	162	143	163	180	184	139	169	CTGGGAGAGGGTTGTTTACTCC	22
rno-miR-30c-2-3p	2343	1973	2085	1784	2459	2109	1956	1934	2414	2149	2309	2278	CTGGGAGAAGGCTGTTTACTCT	22
rno-miR-30c-5p	47779	44977	47732	42616	51116	41983	43113	38320	45093	44055	47952	40082	TGTAAACATCCTACACTCTCAGC	23
rno-miR-30d-3p	214	133	161	118	142	116	114	148	123	140	129	105	CTTTCAGTCAGATGTTTGCTGC	22
rno-miR-30d-5p	142602	89351	94932	78476	91066	94060	88485	97363	92327	99729	90742	84736	TGTAAACATCCCCGACTGGAAG	22
rno-miR-30e-3p	12655	5962	7571	6363	7151	6390	6294	7576	6952	7059	6297	6753	CTTTCAGTCGGATGTTTACAGC	22
rno-miR-30e-5p	24969	13954	14419	13323	11571	15798	12695	13877	9967	13181	10742	12925	TGTAAACATCCTTGACTGGAAG	22
rno-miR-3102	1	5	6	3	3	3	2	3	2	4	6	1	CTCTACTCCCTGCCCCAGCCA	21
rno-miR-3120	380	468	428	470	458	578	490	390	369	466	455	438	CACAGCAAGTGTAGACAGGCA	21
rno-miR-31a-3p	17	14	12	15	6	12	5	7	13	13	13	6	TGCTATGCCAACATATTGCCATC	23
rno-miR-31a-5p	813	726	879	762	739	570	552	563	512	792	526	504	AGGCAAGATGCTGGCATAGCTG	22
rno-miR-31b	6	3	5	9	2	6	8	1	4	4	6	3	CTATGCCAGCATCTTGCCT	19
rno-miR-32-3p	12	12	8	3	16	23	9	6	24	16	14	18	GCAATTTAGTGTGTGTGATATT	22
rno-miR-32-5p	72	88	85	74	68	135	83	55	86	116	93	78	TATTGCACATTACTAAGTTGCA	22
rno-miR-320-3p	6592	3583	5702	4413	6845	6126	5704	5643	7300	7694	6612	6993	AAAAGCTGGGTTGAGAGGGCGA	22
rno-miR-320-5p	2	0	0	0	0	1	1	0	0	0	1	0	GCCTTCTCTTCCCGGTTCTTCC	22
rno-miR-322-3p	283	89	179	113	126	139	109	123	115	229	127	110	AAACATGAAGCGCTGCAACA	20
rno-miR-322-5p	170	47	64	54	83	60	37	53	62	97	60	41	CAGCAGCAATTCATGTTTTGGA	22
rno-miR-323-3p	86	178	118	54	42	68	138	123	1128	1943	470	307	CACATTACACGGTCGACCTCT	21
rno-miR-323-5p	0	1	2	1	0	0	6	1	46	93	15	9	AGGTGGTCCGTGGCGCGTTCGC	22
rno-miR-324-3p	25	31	39	33	26	31	31	20	28	34	26	31	CCACTGCCCCAGGTGCTGCTGG	22
rno-miR-324-5p	37	56	36	31	33	43	28	34	40	35	49	29	CGCATCCCCTAGGGCATTGGTGT	23
rno-miR-325-3p	3	13	6	0	1	2	3	3	31	38	10	11	TTTATTGAGCACCTCCTATCAA	22
rno-miR-325-5p	31	96	69	35	45	44	95	60	360	509	185	151	CCTAGTAGGTGCTCAGTAAGTGT	23
rno-miR-326-3p	23	56	34	21	28	26	16	14	26	47	43	35	CCTCTGGGCCCTTCCTCCAGT	21
rno-miR-326-5p	0	0	1	0	0	0	0	0	0	0	0	0	GGGGGCAGGGCCTTTGTGAA	20
rno-miR-328a-3p	15333	7671	8991	8441	9436	7406	8985	7491	7570	9665	8052	8403	CTGGCCCTCTCTGCCCTTCCGT	22
rno-miR-328b-3p	0	0	0	1	0	0	0	0	0	0	0	0	CTGGCCCTCTCTGCCCTA	18
rno-miR-329-3p	6	13	7	1	11	3	11	6	45	81	21	12	AACACACCCAGCTAACCTTTTT	22
rno-miR-329-5p	1	7	10	3	2	2	0	6	41	62	13	3	AGAGGTTTTCTGGGTCTCTGTTTC	24
rno-miR-33-3p	0	4	2	0	0	1	0	1	0	3	0	1	CAATGTTTCCACAGTGCATCA	21
rno-miR-33-5p	25	47	33	37	29	35	26	19	29	27	15	22	GTGCATTGTAGTTGCATTGCA	21
rno-miR-330-3p	235	263	236	262	297	270	266	199	368	412	286	291	GCAAAGCACAGGGCCTGCAGAGA	23
rno-miR-330-5p	598	633	469	561	522	611	552	579	670	1062	578	508	TCTCTGGGCCTGTGTCTTAGGC	22
rno-miR-331-3p	8	21	15	9	14	28	18	5	8	18	10	11	GCCCCTGGGCCTATCCTAGAA	21
rno-miR-331-5p	2	0	3	4	0	0	0	0	0	0	0	1	GGTCTTGTTTGGGTTTGTT	19
rno-miR-335	35	53	62	73	86	69	47	32	170	132	80	45	TCAAGAGCAATAACGAAAAATGT	23
rno-miR-336-5p	0	2	1	0	3	1	1	2	3	1	0	0	TCACCCTTCCATATCTAGTCT	21
rno-miR-337-3p	0	0	0	1	0	0	1	0	4	2	0	1	TTCAGCTCCTATATGATGCCTTT	23
rno-miR-337-5p	14	32	29	4	33	11	34	11	74	169	45	24	CGGCGTCATGCAGGAGTTGAT	21
rno-miR-338-3p	466	1127	967	437	453	554	951	591	3066	4972	1827	1830	TCCAGCATCAGTGATTTTGTTGA	23
rno-miR-338-5p	723	1160	1166	499	628	891	1340	650	4182	5982	2644	2602	AACAATATCCTGGTGCTGAGTG	22
rno-miR-339-3p	1147	709	744	648	695	787	645	744	595	865	627	611	TGAGCGCCTCGACGACAGAGCCA	23
rno-miR-339-5p	424	541	437	336	418	457	341	222	286	406	377	322	TCCCTGTCCTCCAGGAGCTCACG	23
rno-miR-340-3p	851	449	620	578	540	523	539	619	736	722	576	616	TCCGTCTCAGTTACTTTATAGCC	23
rno-miR-340-5p	916	1144	918	674	782	1225	760	637	1000	1156	825	812	TTATAAAGCAATGAGACTGATT	22
rno-miR-341	4	8	9	4	3	1	11	3	39	102	16	7	TCGGTCGATCGGTCGGTCGGT	21
rno-miR-342-3p	106	85	133	82	83	71	63	54	160	132	114	77	TCTCACACAGAAATCGCACCCGT	23
rno-miR-342-5p	62	58	56	49	34	91	60	46	111	105	71	74	AGGGGTGCTATCTGTGATTGAG	22
rno-miR-343	0	0	0	0	0	0	0	0	0	0	1	0	TCTCCCTCCGTGTGCCCAGA	20
rno-miR-344a-3p	5	3	1	2	0	2	2	3	9	20	3	0	TGATCTAGCCAAAGCCTGACTGT	23
rno-miR-344b-1-3p	1	0	1	0	0	1	1	0	13	25	4	6	GATATAACCAAAGCCCGACTGT	22
rno-miR-344b-3p	0	0	0	0	0	0	0	0	1	1	0	0	GGTATAACCAAAGCCCGACTGT	22
rno-miR-344i	0	0	0	0	0	0	0	2	1	1	0	0	CTCTAGCCAGGGCTTGACTGCA	22
rno-miR-345-3p	314	292	282	361	276	270	255	261	249	315	287	244	CCCTGAACTAGGGGTCTGGAGA	22
rno-miR-345-5p	9	21	8	18	7	11	10	6	6	8	4	11	TGCTGACCCCTAGTCCAGTGC	21
rno-miR-346	1	1	4	0	5	6	4	0	12	24	12	0	TGTCTGCCTGAGTGCCTGCCTCT	23
rno-miR-3473	39	53	63	48	41	38	49	21	28	51	70	61	TCTAGGGCTGGAGAGATGGCTA	22
rno-miR-349	1	0	0	0	0	0	0	0	0	1	0	0	CAGCCCTGCTGTCTTAACCTCT	22
rno-miR-34a-3p	0	0	1	0	0	0	0	0	0	0	0	0	AATCAGCAAGTATACTGCCCTA	22
rno-miR-34a-5p	931	141	241	98	184	77	107	115	127	164	112	102	TGGCAGTGTCTTAGCTGGTTGT	22
rno-miR-34b-3p	10	23	19	12	16	16	8	10	19	30	16	12	AATCACTAACTCCACTGCCATC	22
rno-miR-34b-5p	8	17	16	8	17	12	9	6	28	36	19	11	AGGCAGTGTAATTAGCTGATTGT	23
rno-miR-34c-3p	0	7	9	1	6	9	5	6	6	13	5	3	AATCACTAACCACACAGCCAGG	22
rno-miR-34c-5p	69	147	94	74	92	112	58	66	144	153	85	75	AGGCAGTGTAGTTAGCTGATTGC	23
rno-miR-350	9	12	6	3	3	5	9	13	5	5	3	9	TTCACAAAGCCCATACACTTTCAC	24
rno-miR-351-3p	7	3	9	4	2	12	6	3	8	15	5	5	GGTCAAGAGGCGCCTGGGAAC	21
rno-miR-351-5p	1138	370	771	491	615	555	487	548	688	1061	534	464	TCCCTGAGGAGCCCTTTGAGCCTGA	25
rno-miR-352	7	5	11	8	6	6	12	4	9	11	14	16	AGAGTAGTAGGTTGCATAGTA	21
rno-miR-3542	4	0	0	0	0	0	0	0	0	0	0	0	AAGGCTCTTCTTTCCTTGCAG	21
rno-miR-3543	79	186	205	94	121	78	173	95	690	1063	309	226	CAGGAGTCGAGTGATGGTTCAAA	23
rno-miR-3544	0	0	0	0	0	0	0	0	4	0	0	0	AACTCCTGCATGACGCCGTTCCC	23
rno-miR-3547	0	0	1	0	0	2	0	0	2	2	0	2	TGAGCACCACCCCTCTCTCAGAT	23
rno-miR-3548	0	0	0	1	1	1	0	0	0	0	0	0	CAGCACTGTCCGGTAAGATGCC	22
rno-miR-3553	14	31	57	47	157	448	61	25	147	122	98	136	CAGTGAATTCTACCAGTGCCATA	23
rno-miR-3556a	226	222	197	148	190	264	194	153	212	175	186	248	CGATTTCAGATGGTGCTA	18
rno-miR-3556b	59	57	44	63	52	65	43	45	34	41	59	43	ACCGATTTCAAATGGTGCTA	20
rno-miR-3557-3p	2591	67	400	70	373	105	137	206	122	169	72	124	ACACAGGACCTGGAGTCAGGAG	22
rno-miR-3557-5p	332439	14731	97240	16497	85976	21912	40352	81225	28080	34849	18632	28631	GCCTTCTGACTCCAAGTCCAGT	22
rno-miR-3558-3p	0	0	0	1	0	0	0	0	0	0	0	1	ACTGTGGAGGGTTTCTATGT	20
rno-miR-3558-5p	1	1	0	0	0	0	0	0	0	0	0	0	CCATAGAAGTCATCCCACAGTGCC	24
rno-miR-3559-3p	62	52	52	54	71	72	50	78	56	74	65	69	ATGTAGTACTGAGTCTGTCGTG	22
rno-miR-3559-5p	183	168	148	137	146	127	115	132	124	165	139	148	TGACAGACTTAGTACTACATGA	22
rno-miR-3560	19	7	13	6	6	10	4	5	16	16	8	7	CAAATCCTTGCCCGGGTGCATT	22
rno-miR-3569	0	0	0	0	0	0	1	0	0	0	0	0	GGAGGACAGCAGACTCAGGTC	21
rno-miR-3570	51	95	72	80	97	93	62	67	64	77	84	65	GGTACAATCAACGGTCGATGGT	22
rno-miR-3571	380	412	366	426	560	1111	1322	858	1419	510	748	826	TACACACTTCTTTACATTCCATA	23
rno-miR-3572	0	0	2	0	1	3	0	2	0	2	1	1	TTACACTTGCCCTTTTTTCCCCAG	24
rno-miR-3574	121	64	66	55	65	75	63	45	41	74	55	41	TCAGCCGCTGTCACACGCACAG	22
rno-miR-3576	0	1	2	0	1	0	3	3	16	42	6	1	ACACACCAAGGATAATTTCTCC	22
rno-miR-3577	6	5	3	0	2	2	2	1	2	4	2	2	TCTGTCCCTCTTGGCCCTTAG	21
rno-miR-3578	17	28	16	6	13	9	15	15	91	200	46	26	GCGAATATAACACGGTCGATCT	22
rno-miR-3580-3p	0	1	9	19	0	13	0	0	0	12	4	9	TGACTAGGGTAGTATGAGTAGA	22
rno-miR-3580-5p	0	0	0	0	0	0	0	0	0	0	0	2	TGCTTGTACTTATTCTGGTGAC	22
rno-miR-3583-3p	6	5	8	5	6	11	6	2	4	4	5	4	CCTGACTTCTCTCTTCATGCAG	22
rno-miR-3583-5p	0	3	3	2	0	0	0	0	2	3	0	0	AGCATGAAGAGTTCAGATCACGTT	24
rno-miR-3585-3p	0	0	0	0	2	2	0	0	2	2	1	0	TGAACGGCCCTTGTTGTGA	19
rno-miR-3586-3p	156	115	116	78	139	122	122	100	119	156	117	92	ATACTAGACTGTGAGCTCCTCGA	23
rno-miR-3587	0	0	0	1	0	0	0	0	0	0	0	0	AACACTGATTTCAAATGGTGC	21
rno-miR-3588	109774	53703	59126	67547	56778	51169	52452	38325	47522	54991	53750	52122	TCACAAGTTAGGGTCTCAGGGA	22
rno-miR-3589	12	60	39	30	41	33	30	16	24	39	34	18	GAGGAAACCAGCAAGTGTTGAC	22
rno-miR-3590-3p	0	0	0	0	0	0	1	0	0	0	0	3	TAGCACAATGTGAAAAGAGCTC	22
rno-miR-3590-5p	86	147	103	100	96	114	111	74	128	95	141	139	TGCCCTTTTAACATTGCACTG	21
rno-miR-3592	6	1	2	1	2	2	2	2	3	7	1	2	AAGTGTTGTCCGTGAATGATT	21
rno-miR-3593-3p	0	1	0	0	0	0	0	0	0	0	1	0	CTTCAACCTTAAGGGGGCCTCA	22
rno-miR-3594-3p	0	0	0	2	0	0	0	0	1	0	2	0	CACACCGCCTCTGCCCGCTAGT	22
rno-miR-3594-5p	4	1	0	1	4	2	4	2	2	9	0	0	CCCAGGGCAGAGCAGTGTGAA	21
rno-miR-3596a	71249	65719	82785	81222	93229	70992	89641	80211	140053	106825	116216	118493	AACTATACAACCTACTACCTCA	22
rno-miR-3596b	3	8	7	11	5	5	7	9	9	7	14	18	AACTATGCAACCTACTACCT	20
rno-miR-3596c	3227	2586	2962	2527	3489	3387	3197	2994	4798	3978	4624	4655	ACTATACAACCTCCTACCTCA	21
rno-miR-3596d	27365	17994	20370	13664	17801	21601	16280	18000	22566	17211	17427	20177	CTATACAATCTACTACCTCA	20
rno-miR-361-3p	1723	805	1035	744	1112	715	928	1147	1131	1234	1055	924	CCCCCAGGTGTGATTCTGATTCGT	24
rno-miR-361-5p	287	436	399	409	474	381	347	234	435	443	447	395	TTATCAGAATCTCCAGGGGTAC	22
rno-miR-362-3p	13	19	13	5	11	6	13	7	10	12	7	1	AACACACCTGTTCAAGGATTCA	22
rno-miR-362-5p	6	11	12	3	8	27	2	4	7	3	7	5	AATCCTTGGAACCTAGGTGTGAAT	24
rno-miR-363-3p	44	90	73	39	12	40	69	20	153	243	145	141	AATTGCACGGTATCCATCTGT	21
rno-miR-363-5p	1	2	0	0	0	1	0	0	4	4	2	0	CGGGTGGATCACGATGCAATTT	22
rno-miR-365-3p	854	514	590	311	670	308	328	316	376	351	371	340	TAATGCCCCTAAAAATCCTTAT	22
rno-miR-365-5p	0	0	0	0	0	0	0	0	1	0	0	0	GAGGGACTTTCAGGGGC	17
rno-miR-369-3p	7	33	25	8	18	13	47	14	103	213	49	49	AATAATACATGGTTGATCTTT	21
rno-miR-369-5p	32	61	51	31	43	45	55	44	237	575	131	74	AGATCGACCGTGTTATATTCGC	22
rno-miR-370-3p	70	130	87	21	59	36	95	94	487	1020	214	136	GCCTGCTGGGGTGGAACCTGGT	22
rno-miR-370-5p	1	0	0	0	1	0	0	2	6	7	7	4	CAGGTCACGTCTCTGCAGTTACAC	24
rno-miR-374-3p	766	530	653	661	746	652	598	576	779	797	806	683	CTTAGCACGTTGTATTATTATT	22
rno-miR-374-5p	2110	2216	2235	1925	2216	2163	1843	1249	1727	2144	1891	1800	ATATAATACAACCTGCTAAGTG	22
rno-miR-375-3p	4	94	53	177	157	265	68	56	1525	5006	174	137	TTTGTTCGTTCGGCTCGCGTGA	22
rno-miR-376a-3p	0	0	0	0	0	0	0	0	1	0	0	2	ATCGTAGAGGAAAATCCACGT	21
rno-miR-376a-5p	1	0	0	0	0	1	0	0	1	3	1	0	GGTAGATTCTCCTTCTATGAG	21
rno-miR-376b-3p	3	9	3	1	1	3	15	2	30	37	6	3	ATCATAGAGGAACATCCACTT	21
rno-miR-376b-5p	7	43	32	12	15	28	27	28	107	171	38	34	GTGGATATTCCTTCTATGGTTA	22
rno-miR-376c-3p	5	3	7	1	3	1	3	4	9	12	6	10	AACATAGAGGAAATTTCACGT	21
[truncated: 207 more rows]
