# Supplementary material for: Egg white protein hydrolysate decreased blood pressure via the competing endogenous RNA regulatory networks in female spontaneously hypertensive rats
Source: Royal Society of Chemistry journal article supplement (doi:10.1039/d3fo02797j), 2023-01-01
Supplement: d3fo02797j2.xlsx [file d3fo02797j2.xlsx]

## Sheet: Blood pressure CNTR
Animal #	CNTR1	CNTR2	CNTR3	CNTR4	CNTR5	CNTR6
mmHg
week 0
Systolic	157.1	138.5	154.7	149.2	153.1	133.2
Diastolic	116.9	109.9	122.5	107.4	114.8	107
MAP	143.7	128.967	143.967	135.267	140.333	124.467
week 2
Systolic	151.8	151.7	151.6	153	152.5	150.9
Diastolic	113.3	115.4	146.4	119.6	122.6	110
MAP	138.967	139.6	149.867	141.867	142.533	137.267
week 4
Systolic	152.6	152.8	151	152.4	154	152.6
Diastolic	117.9	114.8	113.9	114	128.5	110.5
MAP	141.033	140.133	138.633	139.6	145.5	138.567
week 6
Systolic	148.5	152.4	152.6	156.1	153.3	139.9
Diastolic	111.6	124.8	110.4	117.7	127.2	108.3
MAP	136.2	143.2	138.533	143.3	144.6	129.367
week 8
Systolic	152.3	151.2	151	157.7	153.1	153.1
Diastolic	115.6	119.3	135.1	122.6	118.8	101.9
MAP	140.067	140.567	145.7	146	141.667	136.033
week 10
Systolic	152.9	153.5	152.2	153.3	152.3	150.7
Diastolic	116.1	112.7	113.3	121.9	144.4	134.9
MAP	140.633	139.9	139.233	142.833	149.667	145.433

## Sheet: Blood pressure LOW
Animal #	LOW1	LOW2	LOW3	LOW4	LOW5	LOW6
mmHg
week 0
Systolic	150.8	151.4	152.5	151.6	145.6	151.7
Diastolic	113.1	126.4	134.6	111.3	108.7	119.5
MAP	138.233	143.067	146.533	138.167	133.3	140.967
week 2
Systolic	152.7	151.6	154.4	151.9	150.8	152.1
Diastolic	102.6	101.7	89.6	106.9	91.8	95
MAP	136	134.967	132.8	136.9	131.133	133.067
week 4
Systolic	144.6	154.9	140.5	156.6	172	139.8
Diastolic	92.9	95.4	104.9	94.1	108.1	105.3
MAP	127.367	135.067	128.633	135.767	150.7	128.3
week 6
Systolic	152	153.2	152.1	154.7	153.9	150.8
Diastolic	94	92.6	92.5	105.1	100.8	100.3
MAP	132.667	133	132.233	138.167	136.2	133.967
week 8
Systolic	152.7	151.7	151.5	151.2	152.1	151.8
Diastolic	97.3	99.2	125.3	100.1	84.7	84
MAP	134.233	134.2	142.767	134.167	129.633	129.2
week 10
Systolic	157.2	156.7	155.2	155.6	151.9	151.1
Diastolic	113.5	105.3	120.2	113.4	97.9	101.1
MAP	142.633	139.567	143.533	141.533	133.9	134.433

## Sheet: Blood pressure HIGH
Animal #	HIGH1	HIGH2	HIGH3	HIGH4	HIGH5	HIGH6
mmHg
week 0
Systolic	152.6	152.5	152.5	150.8	152.2	162.7
Diastolic	124.5	127.5	121.9	120	118.9	119.3
MAP	143.233	144.167	142.3	140.533	141.1	148.233
week 2
Systolic	151.9	151.8	151.7	152.8	153	152.6
Diastolic	113.2	107.8	109.5	132.7	118.3	116.1
MAP	139	137.133	137.633	146.1	141.433	140.433
week 4
Systolic	148.7	139.9	145.3	149.2	153.3	152.3
Diastolic	104.6	92.3	98.3	89.7	101.7	94
MAP	134	124.033	129.633	129.367	136.1	132.867
week 6
Systolic	143.1	143.1	142	143.2	132.7	143
Diastolic	95.8	92.4	82.3	92.6	86.8	99.7
MAP	127.333	126.2	122.1	126.333	117.4	128.567
week 8
Systolic	141.5	141.5	141.8	144.7	136.4	136.4
Diastolic	89.4	96.3	91	90.1	93.9	102.7
MAP	124.133	126.433	124.867	126.5	122.233	125.167
week 10
Systolic	131.3	132.2	133.4	133.6	133.3	133
Diastolic	94.1	90.4	88.8	82.9	84.3	91.9
MAP	118.9	118.267	118.533	116.7	116.967	119.3

## Sheet: Heart rate
Animal #	CNTR1	CNTR2	CNTR3	CNTR4	CNTR5	CNTR6
bpm
week 0	331.446	322.613	322.395	331.924	330.993	337.65
week 2	340.361	337.233	325.188	340.676	327.849	335.225
week 4	353.043	322.604	320.052	328.885	328.539	317.86
week 6	337.844	327.756	322.277	329.969	326.153	327.373
week 8	328.958	327.933	321.457	330.024	329.233	328.282
week 10	325.969	326.303	320.08	320.08	341.433	322.811
Animal #	LOW1	LOW2	LOW3	LOW4	LOW5	LOW6
bpm
week 0	321.296	331.837	317.95	317.153	325.543	323.593
week 2	336.33	331.623	328.355	326.326	322.252	308.549
week 4	331.193	328.157	332.404	344.072	334.481	317.633
week 6	340.773	337.16	342.252	344.072	332.449	313.916
week 8	336.681	320.062	323.35	329.553	329.75	319.74
week 10	357.018	326.173	317.392	328.874	323.533	319.202
Animal #	HIGH1	HIGH2	HIGH3	HIGH4	HIGH5	HIGH6
bpm
week 0	330.093	344.572	324.504	328.327	330.38	321.927
week 2	325.969	326.303	320.08	320.08	341.433	322.811
week 4	346.035	341.473	376.543	343.893	339.227	334.852
week 6	321.699	325.058	320	337.651	315.186	337.289
week 8	343.107	313.545	308.629	312.579	313.48	326.77
week 10	322.928	334.78	324.324	327.903	330.208	323.316
