# Supplementary material for: Egg white protein hydrolysate decreased blood pressure via the competing endogenous RNA regulatory networks in female spontaneously hypertensive rats
Source: Royal Society of Chemistry journal article supplement (doi:10.1039/d3fo02797j), 2023-01-01
Supplement: d3fo02797j3.xlsx [file d3fo02797j3.xlsx]

## Sheet: Aorta_CNTN5
Sample	Target	CT		Target	CT		△CT	Average △CT	21.3492	△△CT	Fold change
CNTR1	GAPDH	12.2094		CNTN5	32.9115		20.7021	21.0075		-0.341666	1.26722
CNTR1	GAPDH	12.219		CNTN5	33.4296		21.2106
CNTR1	GAPDH	12.6196		CNTN5	33.7295		21.1099
CNTR3	GAPDH	11.9081		CNTN5	32.7175		20.8094	21.2187		-0.130517	1.09469
CNTR3	GAPDH	12.0811		CNTN5	33.4241		21.343
CNTR3	GAPDH	12.3042		CNTN5	33.8078		21.5036
CNTR4	GAPDH	12.2619		CNTN5	32.6365		20.3746	21.6799		0.330749	0.795124
CNTR4	GAPDH	12.29		CNTN5	32.7221		20.4321
CNTR4	GAPDH	12.8008		CNTN5	37.034		24.2332
CNTR6	GAPDH	11.9206		CNTN5	33.1134		21.1928	21.4906		0.141427	0.906622
CNTR6	GAPDH	11.9496		CNTN5	33.7435		21.7939
CNTR6	GAPDH	12.0014		CNTN5	33.4866		21.4852
HIGH1	GAPDH	12.2879		CNTN5	31.8005		19.5126	19.7958		-1.55343	2.93514
HIGH1	GAPDH	12.3594		CNTN5	32.1649		19.8054
HIGH1	GAPDH	12.6351		CNTN5	32.7044		20.0693
HIGH3	GAPDH	11.7324		CNTN5	32.1417		20.4093	20.4082		-0.940976	1.91983
HIGH3	GAPDH	11.7332		CNTN5	32.2054		20.4722
HIGH3	GAPDH	11.9438		CNTN5	32.287		20.3432
HIGH4	GAPDH	11.2814		CNTN5	32.2926		21.0112	20.9189		-0.430245	1.34746
HIGH4	GAPDH	11.927		CNTN5	32.0457		20.1187
HIGH4	GAPDH	11.5162		CNTN5	33.1431		21.6269
HIGH5	GAPDH	12.466		CNTN5	32.413		19.947	19.7443		-1.60491	3.04176
HIGH5	GAPDH	12.5792		CNTN5	32.5494		19.9702
HIGH5	GAPDH	12.7379		CNTN5	32.0535		19.3156

## Sheet: Aorta_Lnc18620
Sample	Target	CT		Target	CT		△CT	Average △CT	7.87903	△△CT	Fold change
CNTR1	GAPDH	20.9296		Lnc18620	29.6945		8.76493	8.53636		0.657328	0.634052
CNTR1	GAPDH	21.1821		Lnc18620	29.797		8.61485
CNTR1	GAPDH	21.5747		Lnc18620	29.804		8.22929
CNTN2	GAPDH	20.8678		Lnc18620	28.8251		7.95729	7.90822		0.0291928	0.979968
CNTN2	GAPDH	20.9753		Lnc18620	28.8366		7.86134
CNTN2	GAPDH	21.0027		Lnc18620	28.9088		7.90603
CNTR3	GAPDH	20.98		Lnc18620	28.6364		7.65637	7.71976		-0.159271	1.11672
CNTR3	GAPDH	21.0531		Lnc18620	28.7702		7.71712
CNTR3	GAPDH	21.1501		Lnc18620	28.9359		7.78579
CNTR4	GAPDH	21.5892		Lnc18620	29.2177		7.62846	7.65218		-0.226851	1.17028
CNTR4	GAPDH	21.6369		Lnc18620	29.3533		7.71643
CNTR4	GAPDH	21.7948		Lnc18620	29.4065		7.61165
CNTR5	GAPDH	20.5699		Lnc18620	28.3609		7.79091	7.77458		-0.104446	1.07508
CNTR5	GAPDH	20.6335		Lnc18620	28.379		7.74549
CNTR5	GAPDH	20.7897		Lnc18620	28.5771		7.78734
CNTR6	GAPDH	20.3335		Lnc18620	27.9946		7.66111	7.68309		-0.195935	1.14547
CNTR6	GAPDH	20.3392		Lnc18620	28.0711		7.73191
CNTR6	GAPDH	20.5104		Lnc18620	28.1666		7.65627
HIGH1	GAPDH	19.4966		Lnc18620	27.329		7.83239	7.83662		-0.0424065	1.02983
HIGH1	GAPDH	19.5835		Lnc18620	27.3701		7.78663
HIGH1	GAPDH	19.6375		Lnc18620	27.5284		7.89085
HIGH2	GAPDH	20.1597		Lnc18620	27.7917		7.63202	7.59497		-0.284058	1.21761
HIGH2	GAPDH	20.2202		Lnc18620	27.8857		7.66554
HIGH2	GAPDH	20.5043		Lnc18620	27.9917		7.48736
HIGH3	GAPDH	18.4776		Lnc18620	26.2429		7.76534	7.79591		-0.0831227	1.05931
HIGH3	GAPDH	18.6056		Lnc18620	26.405		7.79939
HIGH3	GAPDH	18.62		Lnc18620	26.443		7.823
HIGH4	GAPDH	20.2709		Lnc18620	28.1735		7.90256	7.88619		0.00715596	0.995052
HIGH4	GAPDH	20.3712		Lnc18620	28.2438		7.8726
HIGH4	GAPDH	20.4858		Lnc18620	28.3692		7.88339
HIGH5	GAPDH	20.1108		Lnc18620	28.4497		8.33892	8.29353		0.414496	0.750282
HIGH5	GAPDH	20.2374		Lnc18620	28.5604		8.323
HIGH5	GAPDH	20.3458		Lnc18620	28.5644		8.21866
HIGH6	GAPDH	20.0884		Lnc18620	28.2645		8.17614	8.11237		0.233339	0.850664
HIGH6	GAPDH	20.3183		Lnc18620	28.4359		8.11767
HIGH6	GAPDH	20.5084		Lnc18620	28.5517		8.0433

## Sheet: Aorta_Lnc20441
Sample	Target	CT		Target	CT		△CT	Average △CT	-13.3193	△△CT	Fold change
CNTR1	GAPDH	20.9296		Lnc20441	6.8797		-14.0499	-14.4069		-1.08756	2.12514
CNTR1	GAPDH	21.1821		Lnc20441	6.67989		-14.5022
CNTR1	GAPDH	21.5747		Lnc20441	6.90624		-14.6684
CNTN2	GAPDH	20.8678		Lnc20441	6.7228		-14.145	-14.0206		-0.701345	1.62602
CNTN2	GAPDH	20.9753		Lnc20441	6.90296		-14.0723
CNTN2	GAPDH	21.0027		Lnc20441	7.15812		-13.8446
CNTR3	GAPDH	20.98		Lnc20441	5.15709		-15.8229	-15.7285		-2.40917	5.31168
CNTR3	GAPDH	21.0531		Lnc20441	5.33199		-15.7211
CNTR3	GAPDH	21.1501		Lnc20441	5.5087		-15.6414
CNTR4	GAPDH	21.5892		Lnc20441	7.53577		-14.0534	-14.2184		-0.899056	1.86484
CNTR4	GAPDH	21.6369		Lnc20441	7.25849		-14.3784
CNTR4	GAPDH	21.7948		Lnc20441	7.57161		-14.2232
CNTR5	GAPDH	20.5699		Lnc20441	6.03963		-14.5303	-8.31899		5.00031	0.0312432
CNTR5	GAPDH	20.6335		Lnc20441	7.0703		-13.5632
CNTR5	GAPDH	20.7897		Lnc20441	23.9262		3.13653
CNTR6	GAPDH	20.3335		Lnc20441	7.20661		-13.1269	-13.2225		0.0968007	0.935104
CNTR6	GAPDH	20.3392		Lnc20441	7.08687		-13.2524
CNTR6	GAPDH	20.5104		Lnc20441	7.22211		-13.2883
HIGH1	GAPDH	19.4966		Lnc20441	6.28638		-13.2103	-13.3041		0.0151948	0.989523
HIGH1	GAPDH	19.5835		Lnc20441	6.43257		-13.1509
HIGH1	GAPDH	19.6375		Lnc20441	6.08638		-13.5512
HIGH2	GAPDH	20.1597		Lnc20441	5.24277		-14.9169	-14.7563		-1.43699	2.70756
HIGH2	GAPDH	20.2202		Lnc20441	5.80462		-14.4156
HIGH2	GAPDH	20.5043		Lnc20441	5.56789		-14.9364
HIGH4	GAPDH	20.2709		Lnc20441	7.3288		-12.9421	-13.0996		0.219725	0.858729
HIGH4	GAPDH	20.3712		Lnc20441	7.23931		-13.1319
HIGH4	GAPDH	20.4858		Lnc20441	7.26107		-13.2247
HIGH5	GAPDH	20.1108		Lnc20441	7.20019		-12.9106	-13.1246		0.194712	0.873747
HIGH5	GAPDH	20.2374		Lnc20441	7.0681		-13.1693
HIGH5	GAPDH	20.3458		Lnc20441	7.05188		-13.2939
HIGH6	GAPDH	20.0884		Lnc20441	7.21522		-12.8732	-12.9206		0.398659	0.758563
HIGH6	GAPDH	20.3183		Lnc20441	7.4616		-12.8567
HIGH6	GAPDH	20.5084		Lnc20441	7.47631		-13.0321

## Sheet: Aorta_Lnc5.1
Sample	Target	CT		Target	CT		△CT	Average △CT	9.65331	△△CT	Fold change
CNTR1	GAPDH	20.9296		Lnc5.1	27.3388		6.40921	8.34434		-1.30897	2.47765
CNTR1	GAPDH	21.1821		Lnc5.1	30.4925		9.31035
CNTR1	GAPDH	21.5747		Lnc5.1	30.8881		9.31344
CNTN2	GAPDH	20.8678		Lnc5.1	28.9382		8.0704	9.22823		-0.42508	1.34265
CNTN2	GAPDH	20.9753		Lnc5.1	29.818		8.84273
CNTN2	GAPDH	21.0027		Lnc5.1	31.7743		10.7716
CNTR3	GAPDH	20.98		Lnc5.1	28.5935		7.61343	8.62325		-1.03006	2.04212
CNTR3	GAPDH	21.0531		Lnc5.1	29.2549		8.20177
CNTR3	GAPDH	21.1501		Lnc5.1	31.2046		10.0545
CNTR4	GAPDH	21.5892		Lnc5.1	30.1139		8.52466	9.55378		-0.0995298	1.07142
CNTR4	GAPDH	21.6369		Lnc5.1	31.6358		9.99886
CNTR4	GAPDH	21.7948		Lnc5.1	31.9327		10.1378
CNTR5	GAPDH	20.5699		Lnc5.1	30.6079		10.038	11.0045		1.35122	0.391961
CNTR5	GAPDH	20.6335		Lnc5.1	31.008		10.3745
CNTR5	GAPDH	20.7897		Lnc5.1	33.3908		12.601
CNTR6	GAPDH	20.3335		Lnc5.1	31.4042		11.0708	11.1658		1.51245	0.350515
CNTR6	GAPDH	20.3392		Lnc5.1	31.5373		11.1981
CNTR6	GAPDH	20.5104		Lnc5.1	31.7388		11.2284
HIGH1	GAPDH	19.4966		Lnc5.1	28.4893		8.99266	9.04923		-0.604076	1.52001
HIGH1	GAPDH	19.5835		Lnc5.1	28.52		8.93648
HIGH1	GAPDH	19.6375		Lnc5.1	28.8561		9.21856
HIGH2	GAPDH	20.1597		Lnc5.1	25.3258		5.16613	5.45692		-4.19639	18.3333
HIGH2	GAPDH	20.2202		Lnc5.1	25.8314		5.61117
HIGH2	GAPDH	20.5043		Lnc5.1	26.0978		5.59345
HIGH3	GAPDH	18.4776		Lnc5.1	25.5813		7.10373	7.13512		-2.51819	5.72864
HIGH3	GAPDH	18.6056		Lnc5.1	25.7159		7.1102
HIGH3	GAPDH	18.62		Lnc5.1	25.8115		7.19142
HIGH4	GAPDH	20.2709		Lnc5.1	25.3365		5.06556	5.02385		-4.62946	24.7518
HIGH4	GAPDH	20.3712		Lnc5.1	25.1284		4.75726
HIGH4	GAPDH	20.4858		Lnc5.1	25.7345		5.24873
HIGH5	GAPDH	20.1108		Lnc5.1	29.0057		8.89486	8.80222		-0.851086	1.80386
HIGH5	GAPDH	20.2374		Lnc5.1	29.2644		9.02703
HIGH5	GAPDH	20.3458		Lnc5.1	28.8305		8.48477
HIGH6	GAPDH	20.0884		Lnc5.1	26.5699		6.48155	6.12063		-3.53268	11.5729
HIGH6	GAPDH	20.3183		Lnc5.1	26.3247		6.00645
HIGH6	GAPDH	20.5084		Lnc5.1	26.3823		5.8739

## Sheet: Aorta_Lnc11370
Sample	Target	CT		Target	CT		△CT	Average △CT	6.74849	△△CT	Fold change
CNTR1	GAPDH	20.9296		Lnc11370	29.1151		8.18552	7.93679		1.1883	0.43882
CNTR1	GAPDH	21.1821		Lnc11370	29.136		7.95386
CNTR1	GAPDH	21.5747		Lnc11370	29.2456		7.67099
CNTN2	GAPDH	20.5699		Lnc11370	29.8283		9.25833	9.1221		2.37361	0.192962
CNTN2	GAPDH	20.6335		Lnc11370	29.7435		9.11005
CNTN2	GAPDH	20.7897		Lnc11370	29.7876		8.99793
CNTR4	GAPDH	19.4966		Lnc11370	23.7101		4.2135	4.82494		-1.92355	3.79354
CNTR4	GAPDH	19.5835		Lnc11370	24.5615		4.97803
CNTR4	GAPDH	19.6375		Lnc11370	24.9208		5.2833
CNTR5	GAPDH	20.1597		Lnc11370	25.8257		5.66602	5.03198		-1.71651	3.28639
CNTR5	GAPDH	20.2202		Lnc11370	25.072		4.85178
CNTR5	GAPDH	20.5043		Lnc11370	25.0825		4.57815
CNTR6	GAPDH	18.4776		Lnc11370	25.1757		6.69814	6.82662		0.0781288	0.947285
CNTR6	GAPDH	18.6056		Lnc11370	25.4684		6.86278
CNTR6	GAPDH	18.62		Lnc11370	25.539		6.91894
HIGH1	GAPDH	20.2709		Lnc11370	25.1717		4.90077	4.20995		-2.53854	5.81
HIGH1	GAPDH	20.3712		Lnc11370	24.3574		3.98624
HIGH1	GAPDH	20.4858		Lnc11370	24.2286		3.74285
HIGH2	GAPDH	20.1108		Lnc11370	24.1125		4.00166	3.97935		-2.76914	6.81701
HIGH2	GAPDH	20.2374		Lnc11370	24.2357		3.99831
HIGH2	GAPDH	20.3458		Lnc11370	24.2838		3.93809
HIGH4	GAPDH	20.8678		Lnc11370	24.1199		3.25213	3.18816		-3.56033	11.7968
HIGH4	GAPDH	20.9753		Lnc11370	24.1419		3.16662
HIGH4	GAPDH	21.0027		Lnc11370	24.1485		3.14574
HIGH5	GAPDH	20.98		Lnc11370	23.152		2.17198	2.70216		-4.04633	16.5222
HIGH5	GAPDH	21.0531		Lnc11370	23.3252		2.27215
HIGH5	GAPDH	21.1501		Lnc11370	24.8124		3.66234
HIGH6	GAPDH	21.5892		Lnc11370	24.4632		2.87398	2.71494		-4.03355	16.3764
HIGH6	GAPDH	21.6369		Lnc11370	24.3401		2.70322
HIGH6	GAPDH	21.7948		Lnc11370	24.3625		2.56762

## Sheet: Aorta_circ8678
Sample	Target	CT		Target	CT		△CT	Average △CT	12.6829	△△CT	Fold change
CNTN2	GAPDH	14.7251		circ8678	28.2927		13.5677	13.4971		0.897502	0.536815
CNTN2	GAPDH	14.8522		circ8678	28.7101		13.8579
CNTN2	GAPDH	15.7197		circ8678	28.7854		13.0657
CNTR3	GAPDH	14.9774		circ8678	27.0905		12.1131	12.3706		-0.229034	1.17205
CNTR3	GAPDH	14.995		circ8678	27.2746		12.2796
CNTR3	GAPDH	14.6306		circ8678	27.3496		12.719
CNTR4	GAPDH	14.7925		circ8678	27.4189		12.6265	12.2812		-0.31835	1.2469
CNTR4	GAPDH	15.3328		circ8678	27.42		12.0873
CNTR4	GAPDH	15.3725		circ8678	27.5026		12.13
CNTR6	GAPDH	14.3978		circ8678	26.4299		12.0321	12.5828		-0.0168274	1.01173
CNTR6	GAPDH	14.5541		circ8678	27.4299		12.8758
CNTR6	GAPDH	14.9434		circ8678	27.7838		12.8404
HIGH2	GAPDH	14.5692		circ8678	26.2637		11.6945	11.5363		-1.06329	2.08969
HIGH2	GAPDH	14.6825		circ8678	26.5279		11.8454
HIGH2	GAPDH	15.207		circ8678	26.276		11.069
HIGH3	GAPDH	14.8979		circ8678	25.7647		10.8667	10.6629		-1.9367	3.82829
HIGH3	GAPDH	15.3564		circ8678	25.9333		10.5769
HIGH3	GAPDH	15.3988		circ8678	25.9439		10.5451
HIGH4	GAPDH	14.4742		circ8678	26.0071		11.5329	11.4075		-1.19211	2.28487
HIGH4	GAPDH	14.5588		circ8678	25.8041		11.2453
HIGH4	GAPDH	14.6412		circ8678	26.0855		11.4443
HIGH5	GAPDH	14.438		circ8678	26.5147		12.0767	11.5628		-1.03677	2.05163
HIGH5	GAPDH	14.9256		circ8678	26.5974		11.6718
HIGH5	GAPDH	15.0083		circ8678	25.9483		10.94
HIGH6	GAPDH	15.0317		circ8678	26.3031		11.2713	11.2106		-1.38899	2.61895
HIGH6	GAPDH	15.1053		circ8678	26.1861		11.0809
HIGH6	GAPDH	15.1148		circ8678	26.3944		11.2796

## Sheet: Aorta_circ4291
Sample	Target	CT		Target	CT		△CT	Average △CT	17.0875	△△CT	Fold change
CNTR1	GAPDH	18.3174		circ4291	33.4744		15.1569	16.0681		-0.680549	1.60275
CNTR1	GAPDH	18.3665		circ4291	33.6387		15.2721
CNTR1	GAPDH	18.5158		circ4291	36.2909		17.7751
CNTN2	GAPDH	14.7251		circ4291	34.6142		19.8891	19.5288		2.7802	0.145572
CNTN2	GAPDH	14.8522		circ4291	34.5346		19.6823
CNTN2	GAPDH	15.7197		circ4291	34.7346		19.0149
CNTR3	GAPDH	14.9774		circ4291	31.3605		16.3831	16.6963		-0.0523335	1.03694
CNTR3	GAPDH	14.995		circ4291	31.9903		16.9953
CNTR3	GAPDH	15.6306		circ4291	32.341		16.7104
CNTR4	GAPDH	14.7925		circ4291	31.4239		16.6314	17.2479		0.499277	0.707461
CNTR4	GAPDH	15.3328		circ4291	31.9635		16.6308
CNTR4	GAPDH	15.3725		circ4291	33.854		18.4815
CNTR5	GAPDH	17.9102		circ4291	33.907		15.9968	15.4603		-1.28827	2.44235
CNTR5	GAPDH	18.6223		circ4291	33.941		15.3187
CNTR5	GAPDH	18.6403		circ4291	33.7058		15.0655
CNTR6	GAPDH	14.3978		circ4291	31.9701		17.5723	17.5237		0.775079	0.584357
CNTR6	GAPDH	14.5541		circ4291	32.1852		17.6311
CNTR6	GAPDH	14.9434		circ4291	32.311		17.3676
HIGH1	GAPDH	14.3739		circ4291	31.7739		17.4	17.1914		0.442756	0.735728
HIGH1	GAPDH	14.431		circ4291	31.3428		16.9118
HIGH1	GAPDH	14.5852		circ4291	31.8474		17.2622
HIGH2	GAPDH	14.5692		circ4291	31.9639		17.3947	17.2876		0.539001	0.688247
HIGH2	GAPDH	14.6825		circ4291	32.1552		17.4727
HIGH2	GAPDH	15.207		circ4291	32.2023		16.9954
HIGH3	GAPDH	14.8979		circ4291	31.7803		16.8824	16.5603		-0.188339	1.13945
HIGH3	GAPDH	15.3564		circ4291	31.9267		16.5703
HIGH3	GAPDH	15.3988		circ4291	31.6269		16.228
HIGH4	GAPDH	14.4742		circ4291	32.1779		17.7037	17.6818		0.93316	0.52371
HIGH4	GAPDH	14.5588		circ4291	32.0756		17.5168
HIGH4	GAPDH	14.6412		circ4291	32.4659		17.8247
HIGH5	GAPDH	14.438		circ4291	32.0337		17.5957	17.5489		0.800328	0.574219
HIGH5	GAPDH	14.9256		circ4291	32.316		17.3904
HIGH5	GAPDH	15.0083		circ4291	32.669		17.6607
HIGH6	GAPDH	19.0317		circ4291	32.9829		13.9511	14.1003		-2.64829	6.26925
HIGH6	GAPDH	19.1053		circ4291	32.9981		13.8928
HIGH6	GAPDH	19.1148		circ4291	33.5718		14.457

## Sheet: Aorta_Mir9a5p
Sample	Target	CT		Target	CT		△CT	Average △CT	14.1047	△△CT	Fold change
CNTR1	U6	12.5421		mir9a5p	26.22		13.6779	13.6746		-0.430096	1.34732
CNTR1	U6	12.551		mir9a5p	26.2699		13.7189
CNTR1	U6	12.7044		mir9a5p	26.3315		13.627
CNTN2	U6	11.734		mir9a5p	26.979		15.245	14.5863		0.481592	0.716187
CNTN2	U6	11.7454		mir9a5p	26.0735		14.3281
CNTN2	U6	11.9321		mir9a5p	26.1179		14.1858
CNTR3	U6	11.4855		mir9a5p	25.636		14.1505	14.1109		0.00615256	0.995744
CNTR3	U6	11.5666		mir9a5p	25.6518		14.0852
CNTR3	U6	11.6023		mir9a5p	25.6992		14.0969
CNTR4	U6	10.7528		mir9a5p	24.7624		14.0096	14.0401		-0.0645738	1.04578
CNTR4	U6	10.7985		mir9a5p	24.8125		14.014
CNTR4	U6	10.8414		mir9a5p	24.9382		14.0968
CNTR5	U6	10.7185		mir9a5p	23.8754		13.1569	13.1798		-0.924926	1.89859
CNTR5	U6	10.7421		mir9a5p	23.9411		13.1991
CNTR5	U6	10.7665		mir9a5p	23.9499		13.1834
CNTR6	U6	10.7477		mir9a5p	25.7328		14.9851	15.0366		0.931873	0.524177
CNTR6	U6	10.7809		mir9a5p	25.7477		14.9668
CNTR6	U6	10.7903		mir9a5p	25.9481		15.1578
HIGH1	U6	10.8185		mir9a5p	21.4663		10.6478	10.6301		-3.47455	11.1159
HIGH1	U6	10.851		mir9a5p	21.4853		10.6343
HIGH1	U6	10.9164		mir9a5p	21.5248		10.6084
HIGH2	U6	8.98232		mir9a5p	22.0156		13.0332	13.0136		-1.09115	2.13043
HIGH2	U6	9.01861		mir9a5p	22.0832		13.0646
HIGH2	U6	9.16341		mir9a5p	22.1062		12.9428
HIGH3	U6	9.96588		mir9a5p	24.0968		14.131	14.1079		0.00323082	0.997763
HIGH3	U6	10.0535		mir9a5p	24.1434		14.0899
HIGH3	U6	10.068		mir9a5p	24.1709		14.1029
HIGH4	U6	10.1417		mir9a5p	22.6549		12.5132	12.4392		-1.66549	3.17221
HIGH4	U6	10.1849		mir9a5p	22.6554		12.4705
HIGH4	U6	10.3364		mir9a5p	22.6702		12.3339
HIGH5	U6	10.0375		mir9a5p	24.0202		13.9827	13.9912		-0.11353	1.08187
HIGH5	U6	10.0959		mir9a5p	24.0564		13.9606
HIGH5	U6	10.2178		mir9a5p	24.248		14.0302
HIGH6	U6	10.7166		mir9a5p	24.4758		13.7593	13.7543		-0.350361	1.27488
HIGH6	U6	10.7283		mir9a5p	24.522		13.7937
HIGH6	U6	10.9444		mir9a5p	24.6545		13.7101

## Sheet: Aorta_Mir3255p
Sample	Target	CT		Target	CT		△CT	Average △CT	22.6778	△△CT	Fold change
CNTR1	U6	12.5421		mir3255p	35.2504		22.7083	22.7269		0.049259	0.966433
CNTR1	U6	12.551		mir3255p	35.6817		23.1307
CNTR1	U6	12.7044		mir3255p	35.0462		22.3418
CNTN2	U6	11.734		mir3255p	33.6306		21.8966	21.8636		-0.81407	1.75816
CNTN2	U6	11.7454		mir3255p	33.6651		21.9197
CNTN2	U6	11.9321		mir3255p	33.7066		21.7745
CNTR3	U6	11.4855		mir3255p	32.8953		21.4098	22.0467		-0.631018	1.54866
CNTR3	U6	11.5666		mir3255p	33.5805		22.0139
CNTR3	U6	11.6023		mir3255p	34.3186		22.7163
CNTR4	U6	10.7528		mir3255p	33.892		23.1392	23.2338		0.556134	0.680122
CNTR4	U6	10.7985		mir3255p	34.0322		23.2337
CNTR4	U6	10.8414		mir3255p	34.1699		23.3285
CNTR5	U6	10.7185		mir3255p	33.6759		22.9575	23.1412		0.463536	0.725207
CNTR5	U6	10.7421		mir3255p	33.9546		23.2125
CNTR5	U6	10.7665		mir3255p	34.0202		23.2536
CNTR6	U6	10.7477		mir3255p	33.7017		22.954	23.0543		0.376669	0.770214
CNTR6	U6	10.7809		mir3255p	33.7252		22.9443
CNTR6	U6	10.7903		mir3255p	34.055		23.2647
HIGH1	U6	10.8185		mir3255p	30.8112		19.9926	19.9645		-2.71314	6.55747
HIGH1	U6	10.851		mir3255p	30.8273		19.9763
HIGH1	U6	10.9164		mir3255p	30.8411		19.9247
HIGH2	U6	8.98232		mir3255p	30.7429		21.7605	21.7735		-0.904135	1.87142
HIGH2	U6	9.01861		mir3255p	30.759		21.7404
HIGH2	U6	9.16341		mir3255p	30.9831		21.8197
HIGH3	U6	9.96588		mir3255p	31.858		21.8921	21.6227		-1.05501	2.07773
HIGH3	U6	10.0535		mir3255p	31.9635		21.9101
HIGH3	U6	10.068		mir3255p	31.1338		21.0658
HIGH4	U6	10.1417		mir3255p	31.4934		21.3518	21.3861		-1.29158	2.44796
HIGH4	U6	10.1849		mir3255p	31.6434		21.4586
HIGH4	U6	10.3364		mir3255p	31.6843		21.3479
HIGH5	U6	10.0375		mir3255p	32.5658		22.5283	22.3401		-0.337565	1.26362
HIGH5	U6	10.0959		mir3255p	32.7972		22.7014
HIGH5	U6	10.2178		mir3255p	32.0084		21.7906
HIGH6	U6	10.7166		mir3255p	32.651		21.9345	21.872		-0.805698	1.74799
HIGH6	U6	10.7283		mir3255p	32.9597		22.2314
HIGH6	U6	10.9444		mir3255p	32.3945		21.45

## Sheet: Aorta_Mir3845p
Sample	Target	CT		Target	CT		△CT	Average △CT	21.0725	△△CT	Fold change
CNTR1	U6	12.5421		mir3845p	32.7164		20.1743	20.2328		-0.839735	1.78972
CNTR1	U6	12.551		mir3845p	32.8718		20.3208
CNTR1	U6	12.7044		mir3845p	32.9076		20.2032
CNTN2	U6	11.734		mir3845p	33.087		21.353	21.4363		0.363834	0.777097
CNTN2	U6	11.7454		mir3845p	33.2697		21.5243
CNTN2	U6	11.9321		mir3845p	33.3638		21.4317
CNTR3	U6	11.4855		mir3845p	32.8398		21.3543	20.7404		-0.332123	1.25886
CNTR3	U6	11.5666		mir3845p	32.0037		20.437
CNTR3	U6	11.6023		mir3845p	32.032		20.4298
CNTR4	U6	10.7528		mir3845p	31.9512		21.1984	20.6636		-0.408941	1.32771
CNTR4	U6	10.7985		mir3845p	31.1452		20.3467
CNTR4	U6	10.8414		mir3845p	31.287		20.4456
CNTR5	U6	10.7185		mir3845p	31.9133		21.1948	21.2672		0.194652	0.873783
CNTR5	U6	10.7421		mir3845p	31.9706		21.2285
CNTR5	U6	10.7665		mir3845p	32.1447		21.3782
CNTR6	U6	10.7477		mir3845p	32.7994		22.0518	22.0948		1.02233	0.49232
CNTR6	U6	10.7809		mir3845p	32.8385		22.0576
CNTR6	U6	10.7903		mir3845p	32.9654		22.1752
HIGH2	U6	8.98232		mir3845p	28.2529		19.2706	19.5237		-1.54885	2.92583
HIGH2	U6	9.01861		mir3845p	28.6936		19.675
HIGH2	U6	9.16341		mir3845p	28.7888		19.6254
HIGH3	U6	9.96588		mir3845p	30.1594		20.1935	20.1544		-0.918093	1.88962
HIGH3	U6	10.0535		mir3845p	30.3114		20.2579
HIGH3	U6	10.068		mir3845p	30.0798		20.0118
HIGH4	U6	10.1417		mir3845p	30.1751		20.0335	20.3744		-0.698103	1.62237
HIGH4	U6	10.1849		mir3845p	30.639		20.4541
HIGH4	U6	10.3364		mir3845p	30.972		20.6356
HIGH5	U6	10.0375		mir3845p	30.34		20.3026	20.3833		-0.689182	1.61237
HIGH5	U6	10.0959		mir3845p	30.4299		20.334
HIGH5	U6	10.2178		mir3845p	30.7312		20.5134
HIGH6	U6	10.7166		mir3845p	31.135		20.4184	20.3377		-0.734765	1.66413
HIGH6	U6	10.7283		mir3845p	31.0689		20.3407
HIGH6	U6	10.9444		mir3845p	31.1986		20.2541

[truncated: 7 more sheets: Aorta_Mir5043p, Aorta_Mir6675p, Blood_CNTN5, Blood_Lnc5.1, Blood_Lnc18620, Blood_mir3255p, Blood_mir3845p]
