# Supplementary material for: Egg white protein hydrolysate decreased blood pressure via the competing endogenous RNA regulatory networks in female spontaneously hypertensive rats
Source: Royal Society of Chemistry journal article supplement (doi:10.1039/d3fo02797j), 2023-01-01
Supplement: d3fo02797j4.pdf [file d3fo02797j4.pdf]

# Supplementary Materials

This appendix formed part of the original submission.

Supplement to: Egg white-derived peptides decreased blood pressure via the competing endogenous RNA regulatory networks in female spontaneously hypertensive rats

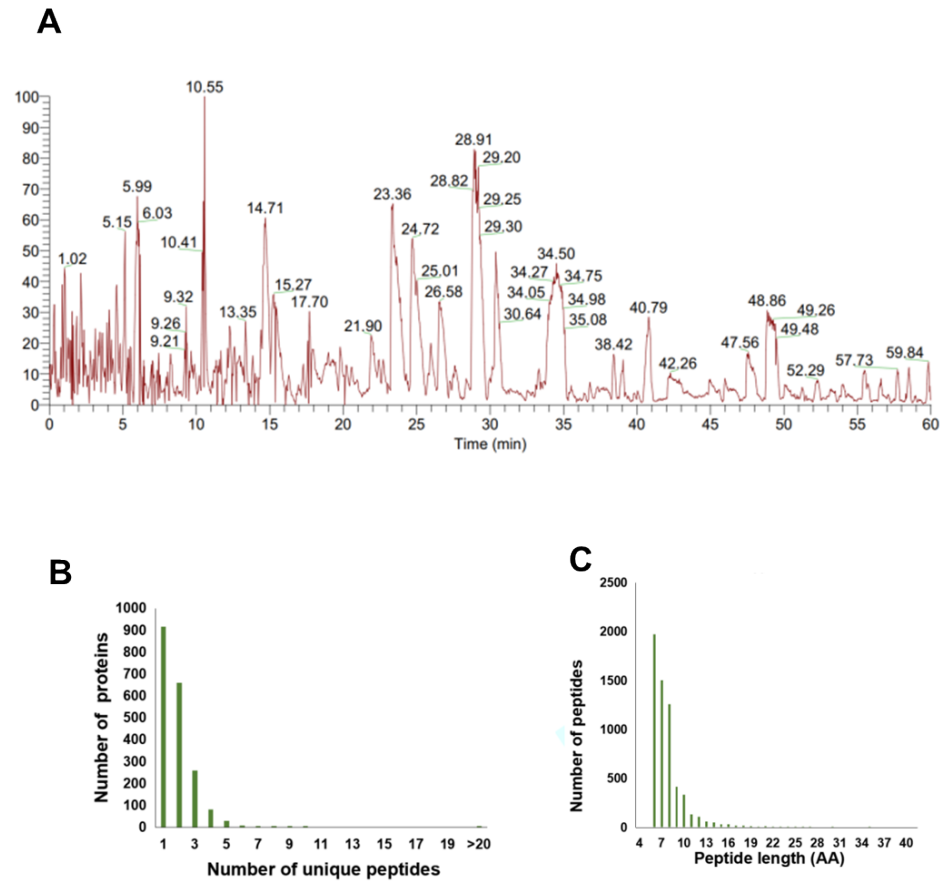

**Supplementary figure 1: The peptide profile of EWH.** (A) The peptides of the EWH sample were profiled by nanoUPLC-MS/MS. (B&C) The peptide distribution was analyzed.

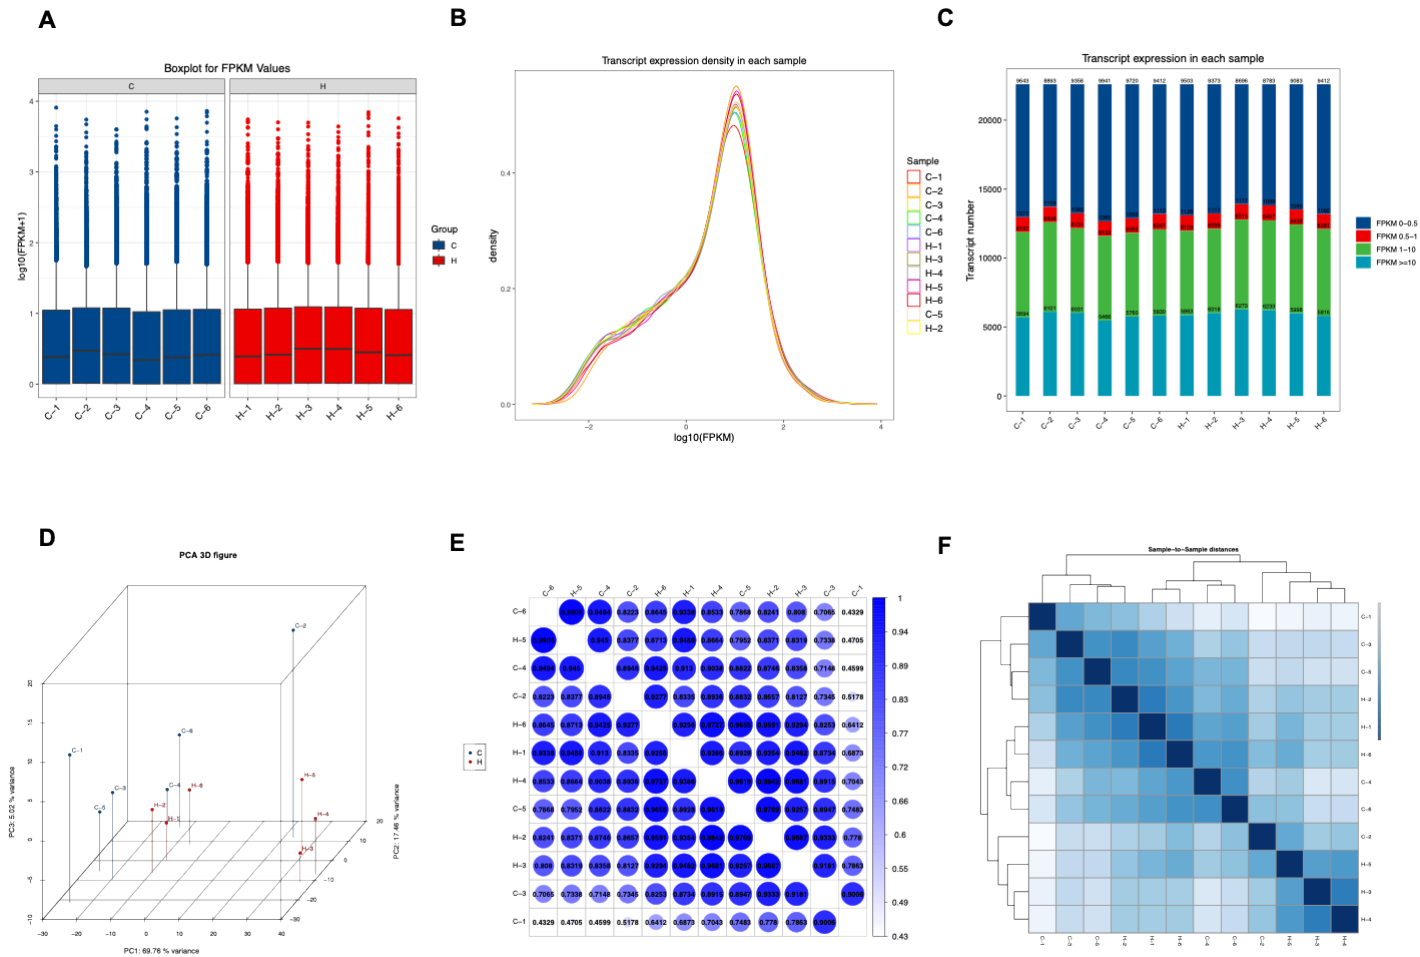

**Supplementary figure 2: quality control data of the sequencing for mRNA.** (A) Barplot of FPKM Values; (B) Transcript expression density in each sample; (C) Transcript expression in each sample; (D) Principal component analysis (PCA) of samples; (E&F) Correlation between each sample.

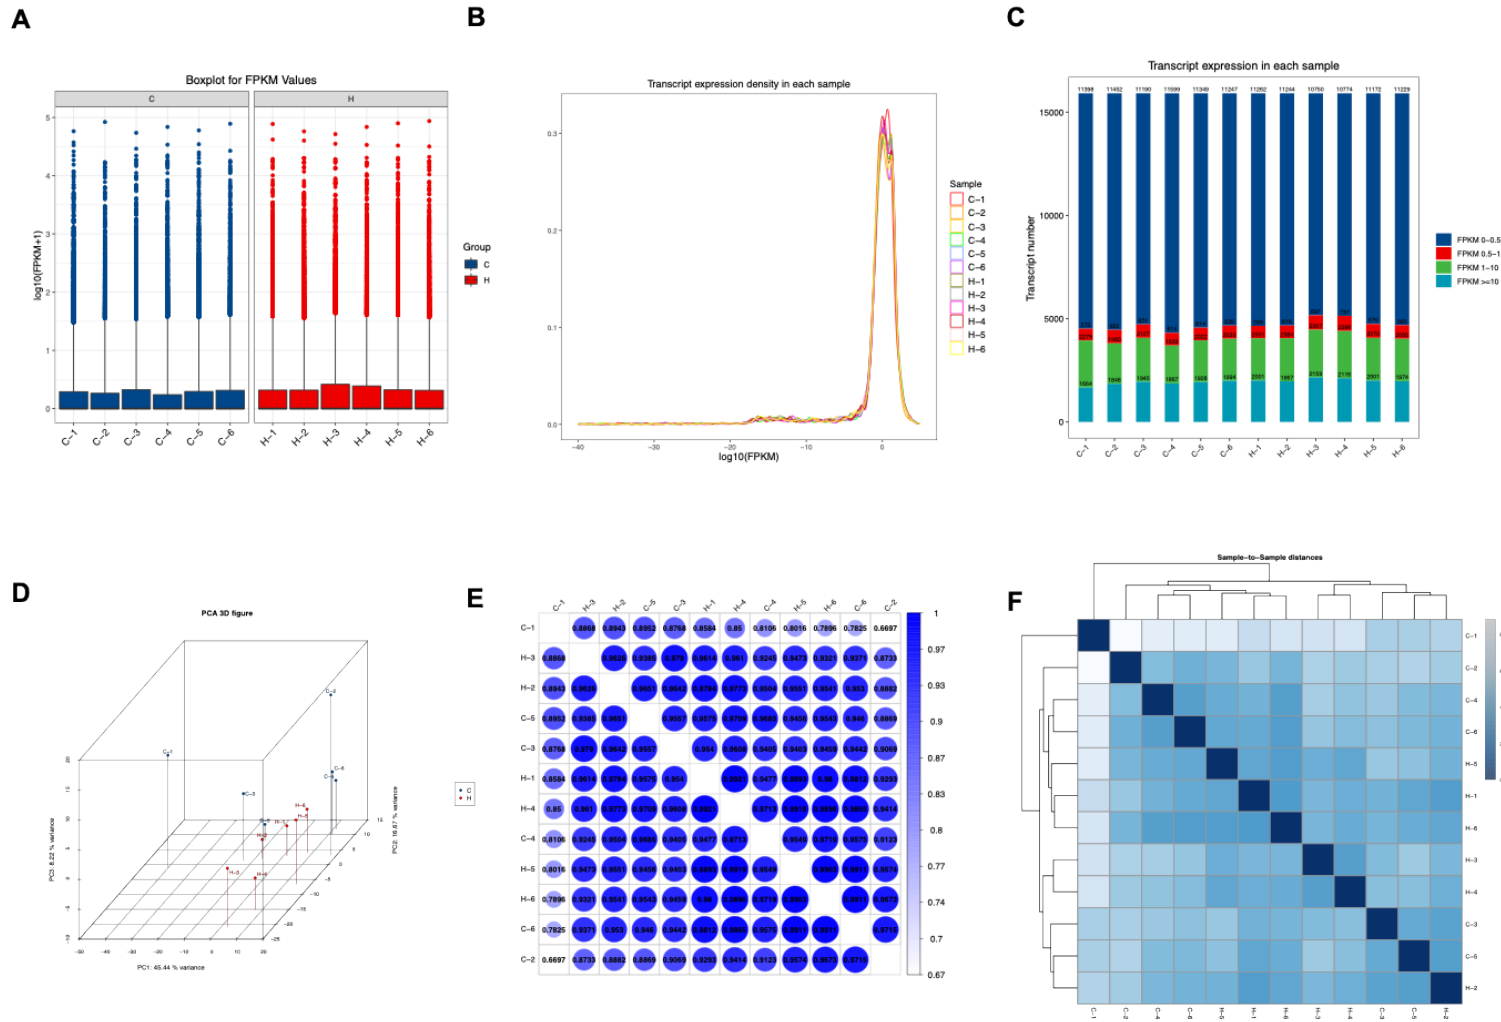

**Supplementary figure 3: quality control data of the sequencing for lncRNA.** (A) Barplot of FPKM Values; (B) Transcript expression density in each sample; (C) Transcript expression in each sample; (D) Principal component analysis (PCA) of samples; (E&F) Correlation between each sample.

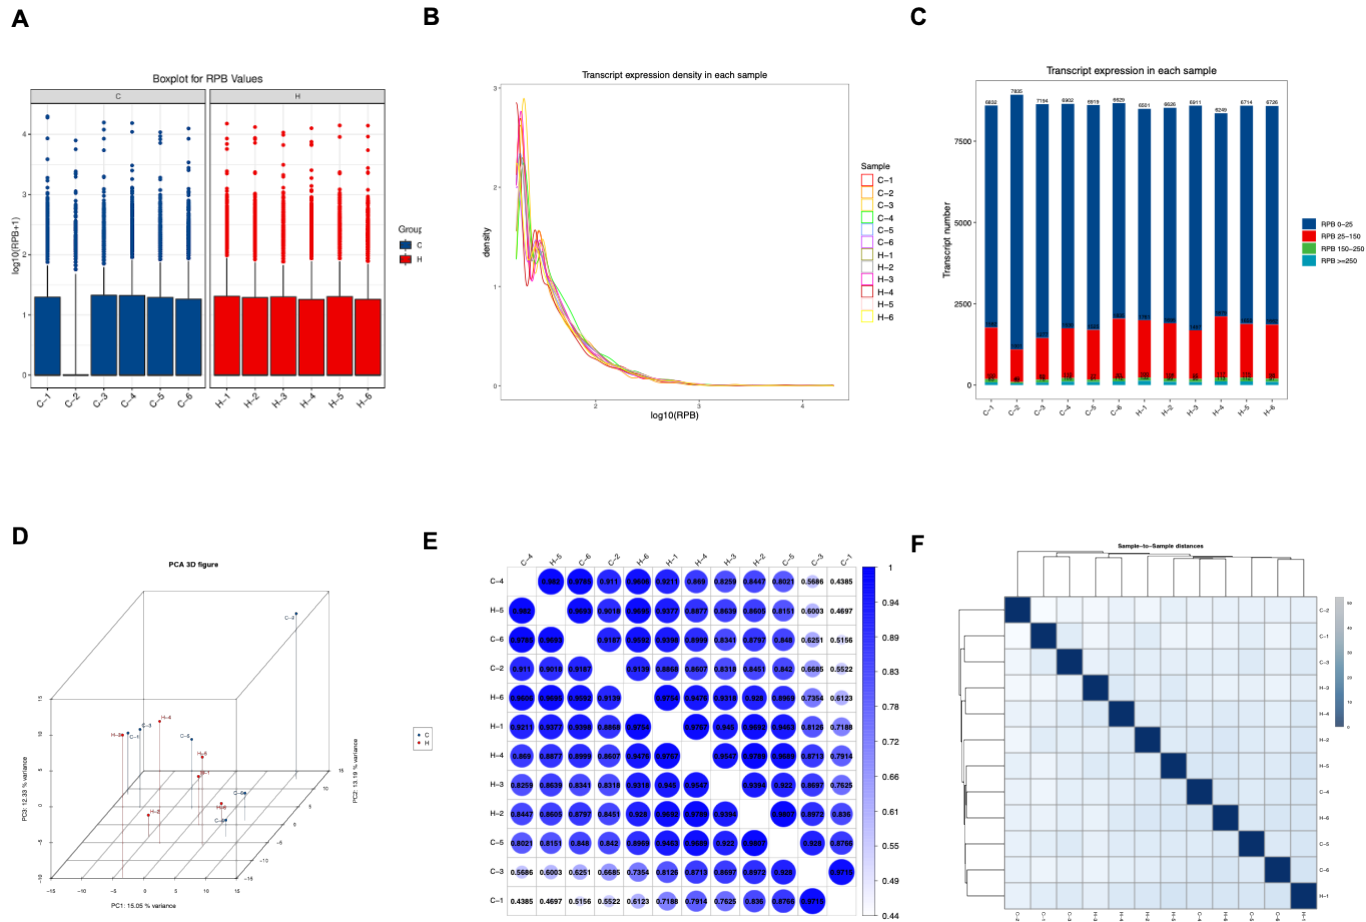

**Supplementary figure 4: quality control data of the sequencing for circRNA.** (A) Barplot of FPKM Values; (B) Transcript expression density in each sample; (C) Transcript expression in each sample; (D) Principal component analysis (PCA) of samples; (E&F) Correlation between each sample.

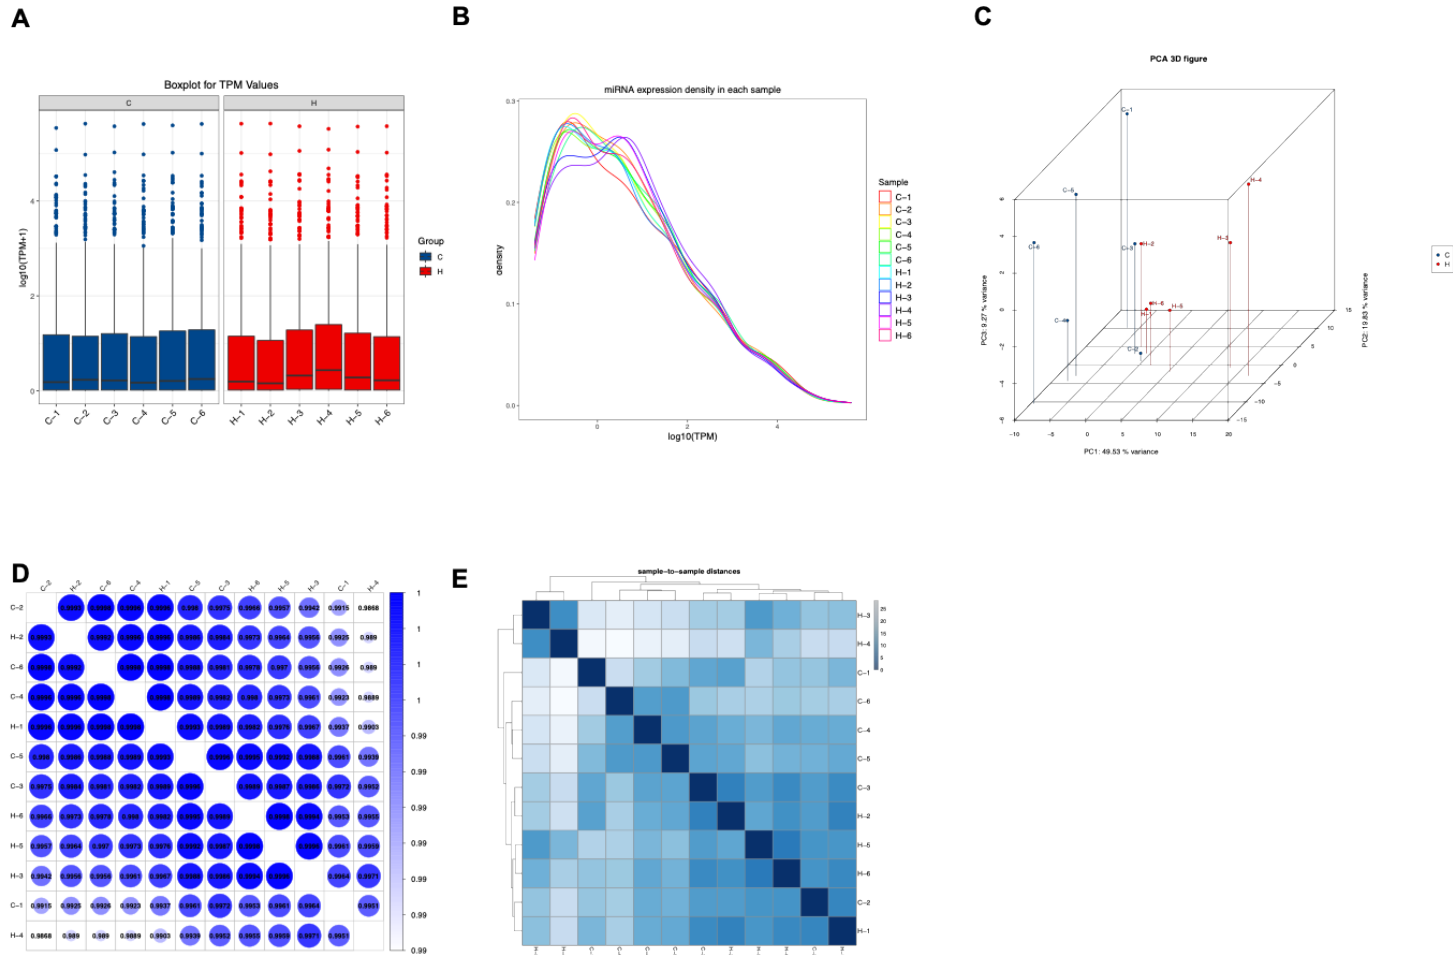

**Supplementary figure 5: quality control data of the sequencing for miRNA.** (A) Barplot of FPKM Values; (B) Transcript expression density in each sample; (C) Transcript expression in each sample; (D) Principal component analysis (PCA) of samples; (E&F) Correlation between each sample.

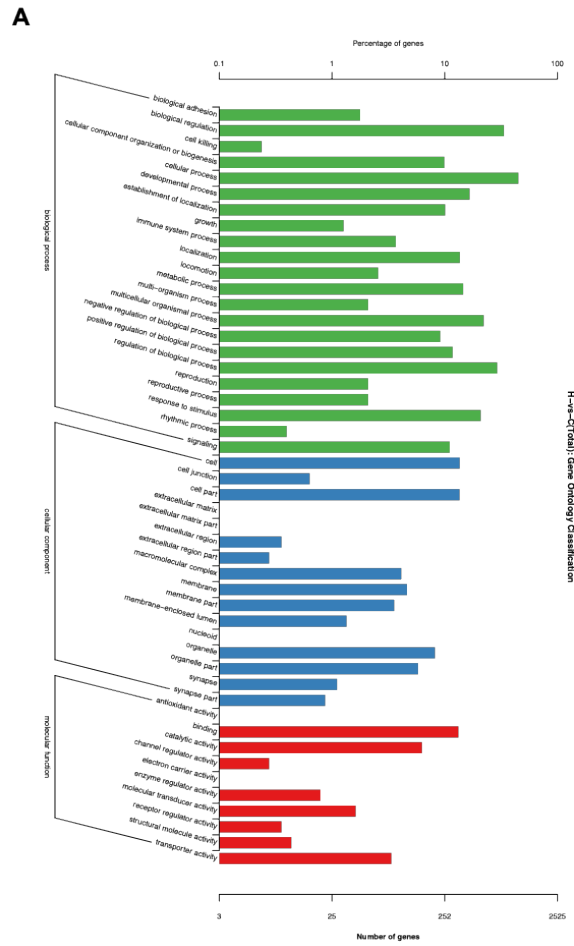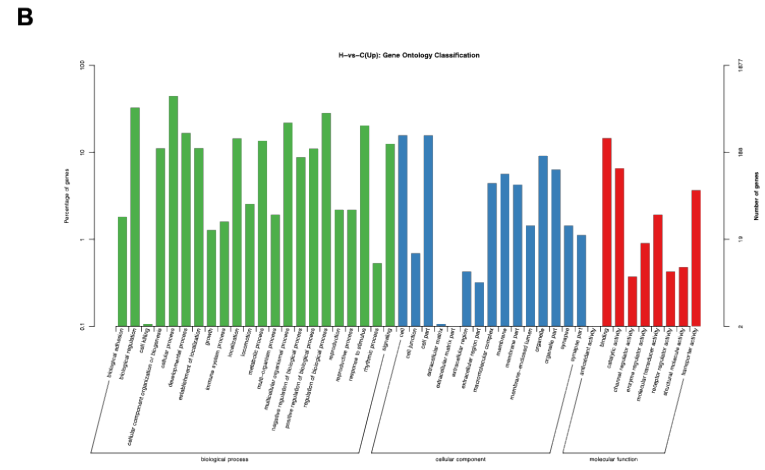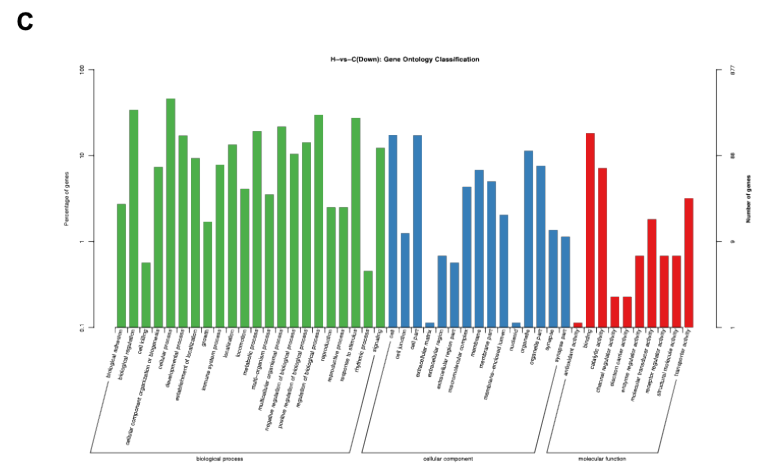

Supplementary figure 6: GO annotation of total identified DE-mRNA (A-C).

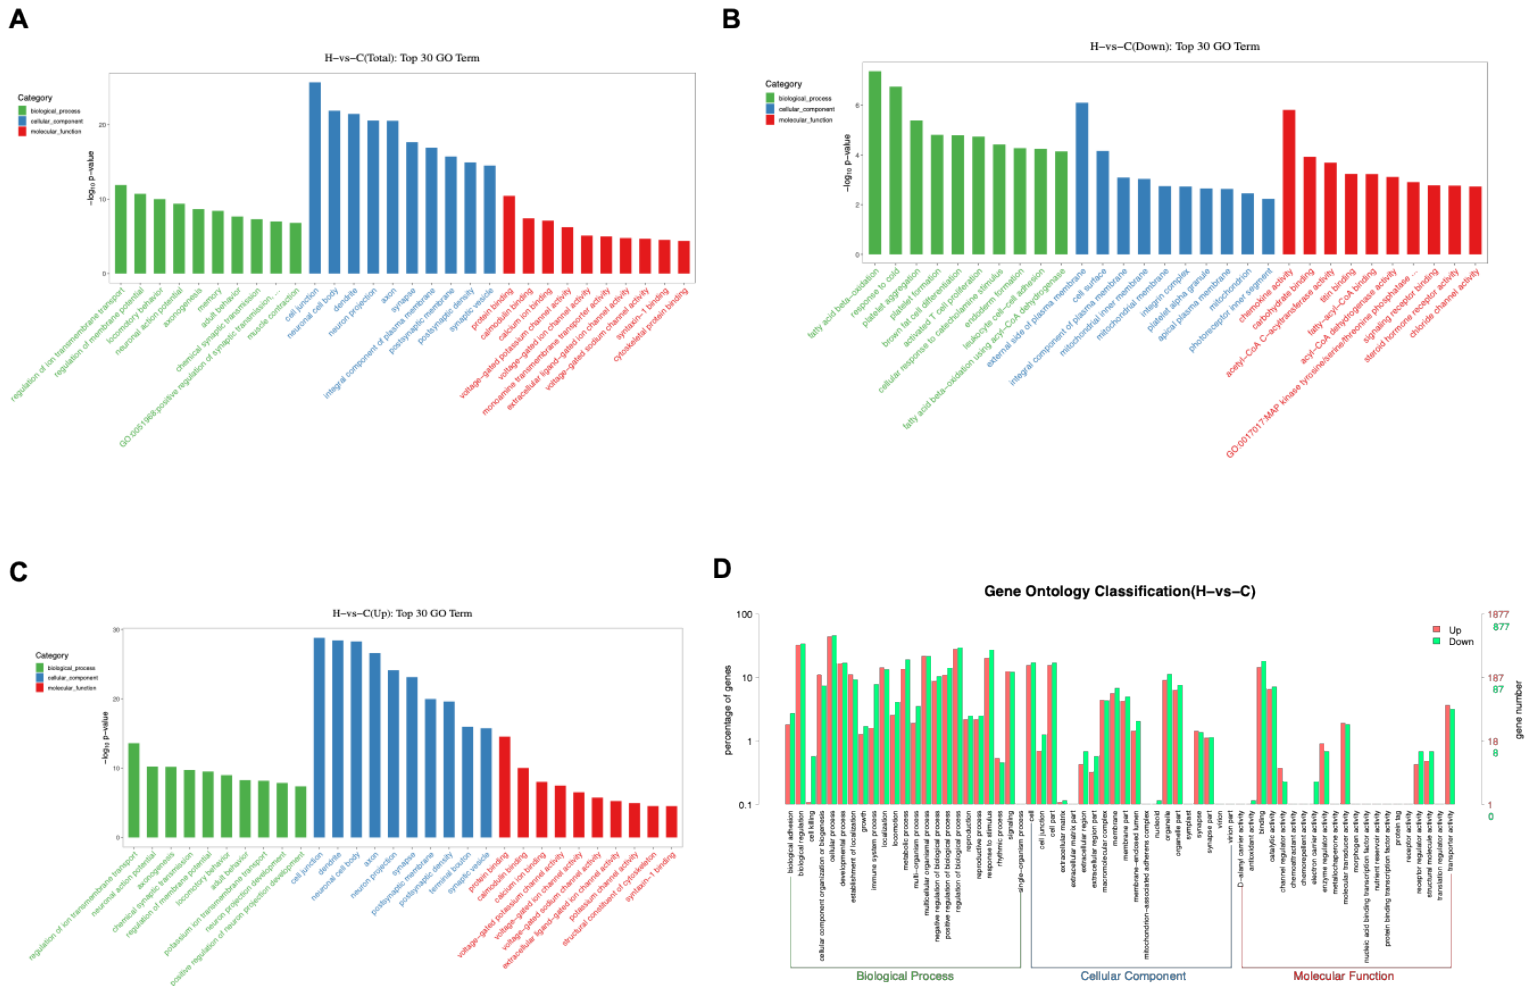

**Supplementary figure 7: GO annotation of top30 identified DE-mRNA.** (A) Top30 GO Terms of total; (B) Top30 GO Terms of down; (C) Top30 GO Terms of up; (D) GO classification.



### H-vs-C(Total): KEGG Pathway Classification

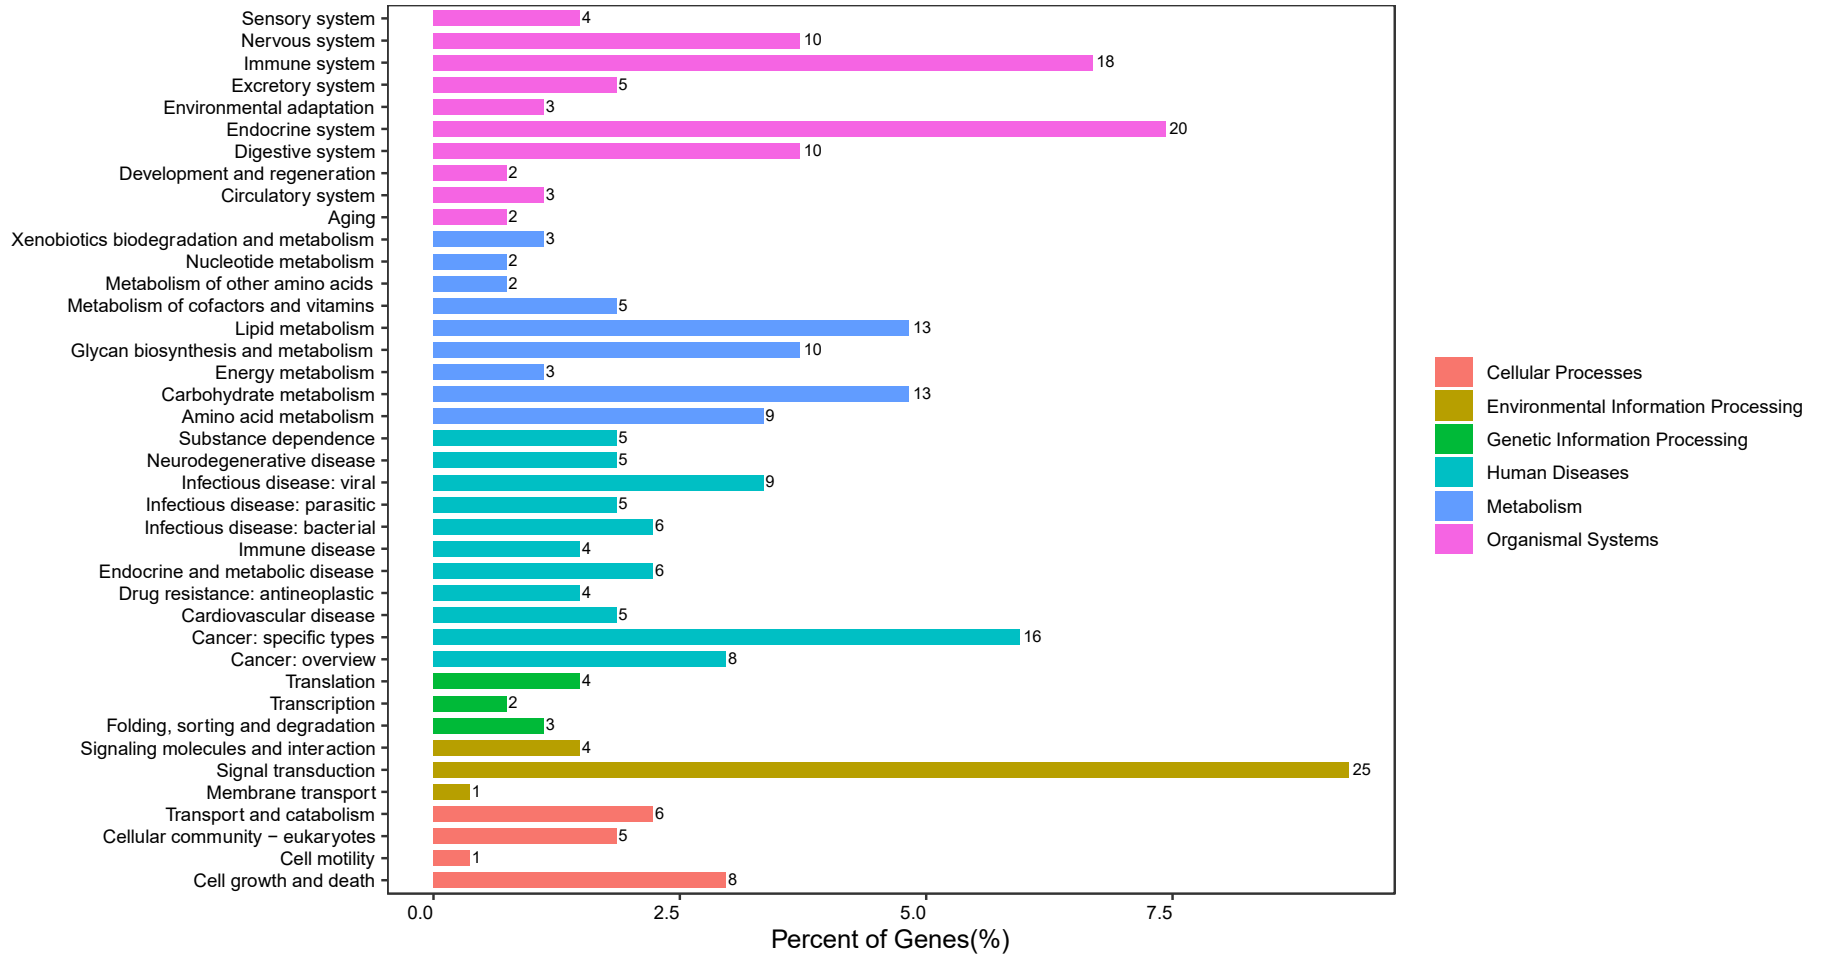

**Supplementary figure 8: KEGG annotation of identified DE-mRNA.**

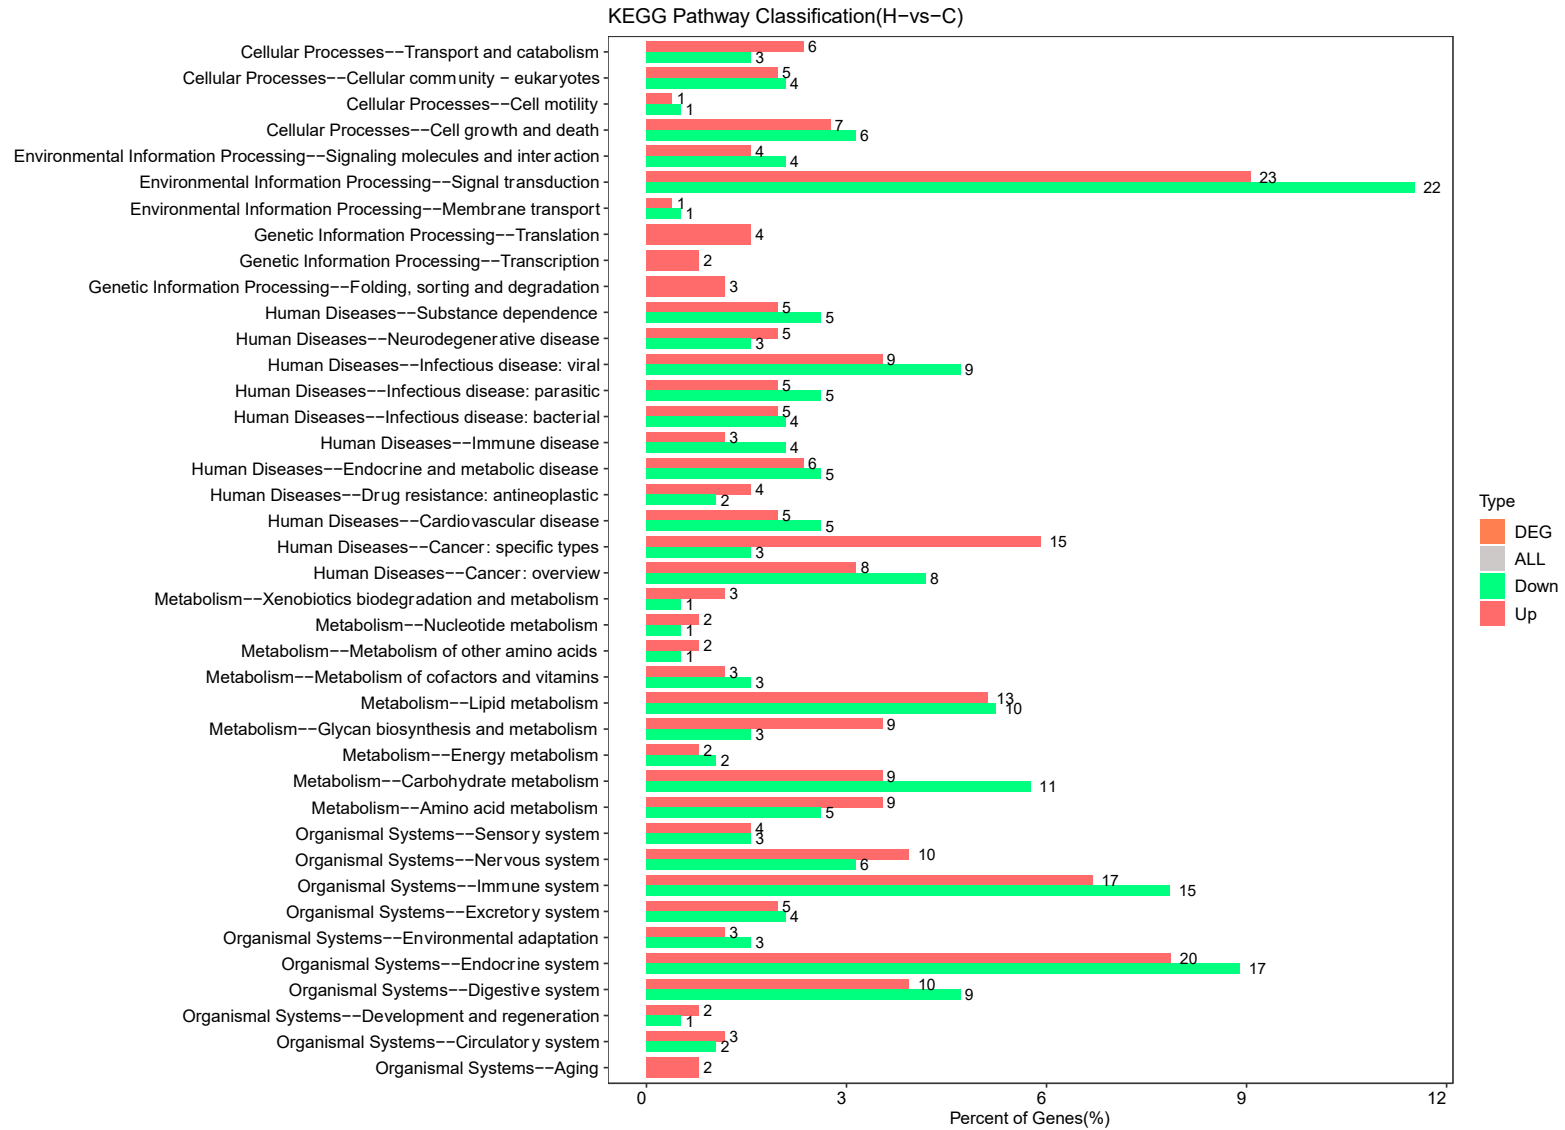

Supplementary figure 9: KEGG annotation of all mRNA.

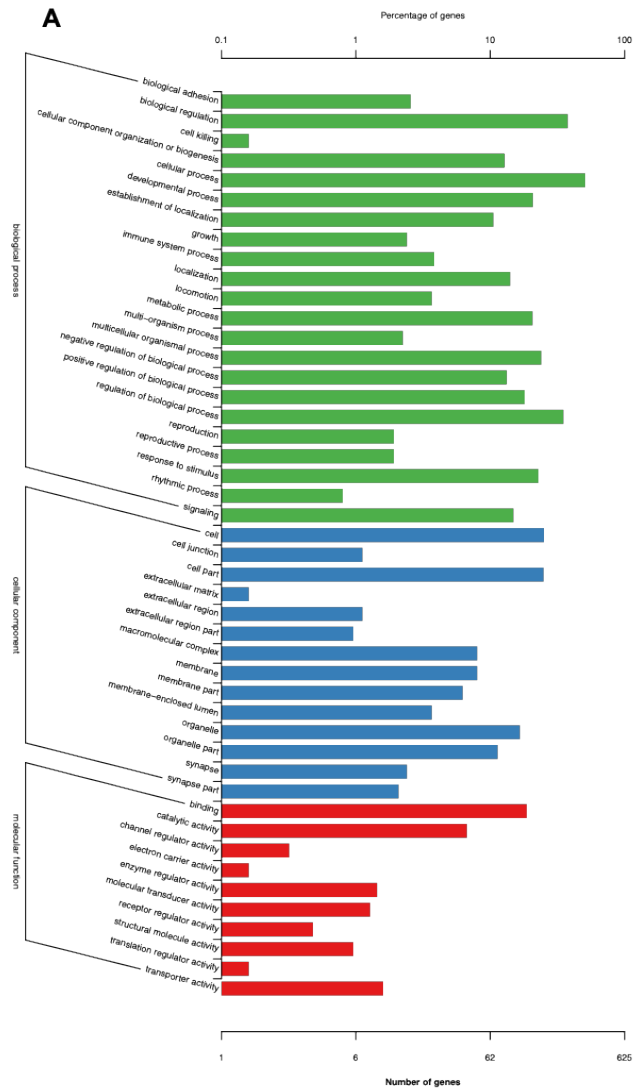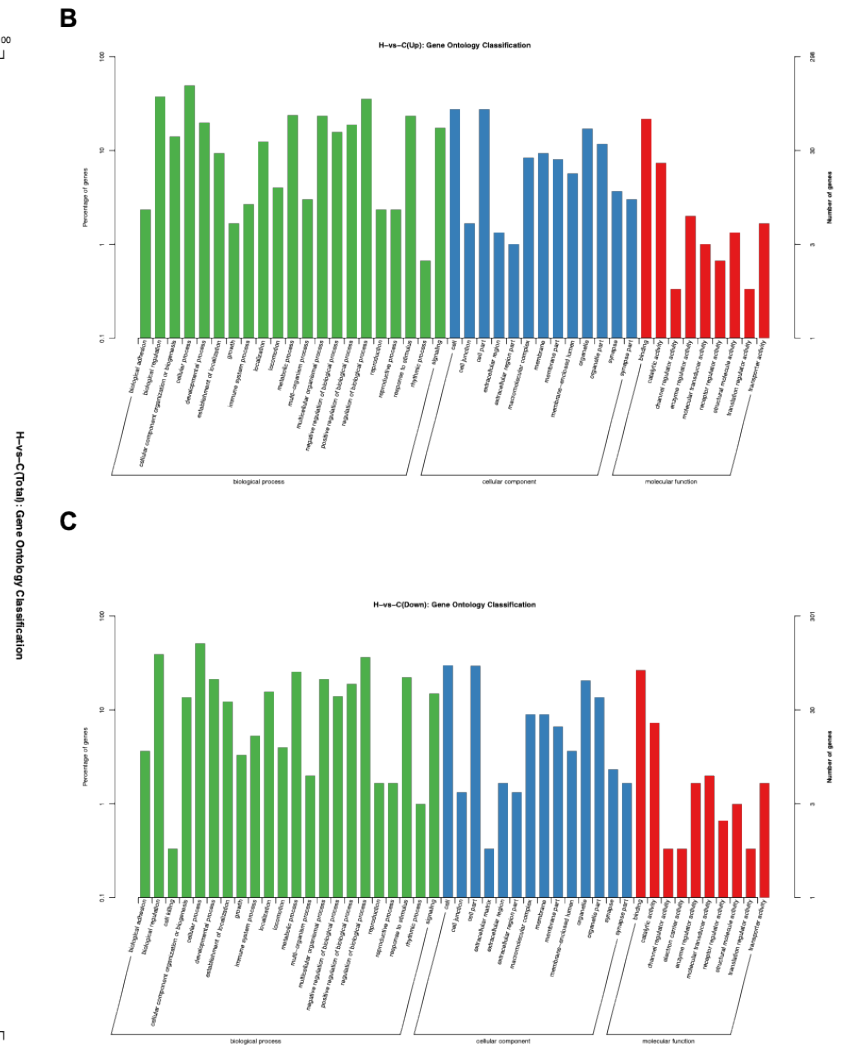

Supplementary figure 10: GO annotation of total identified DE-lncRNA (A-C).

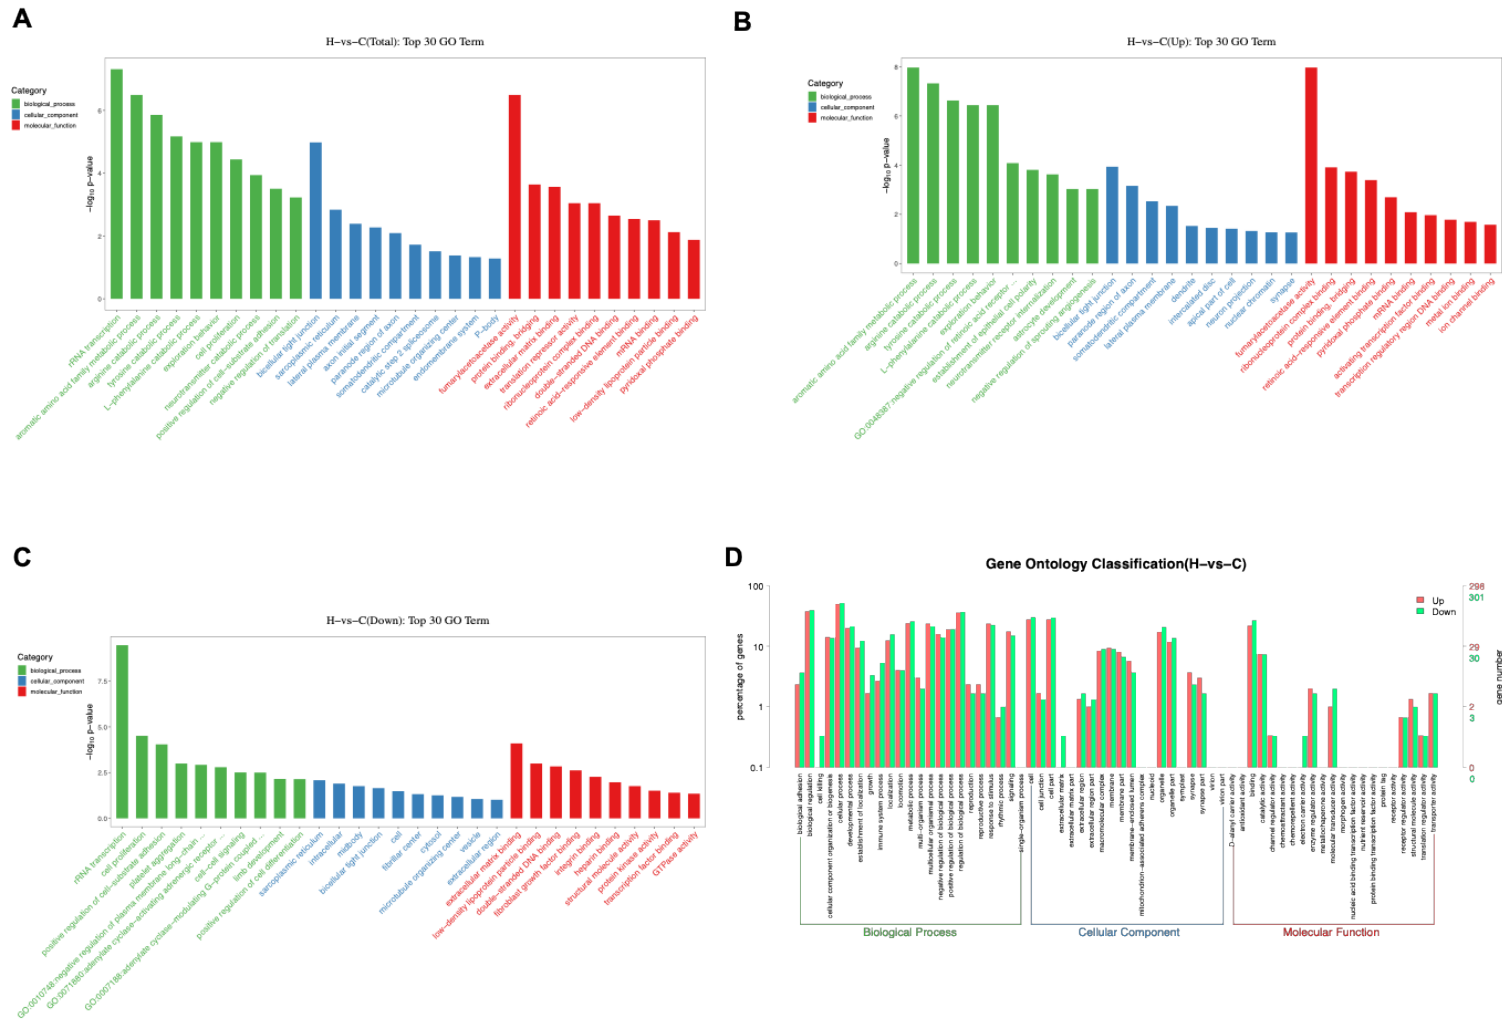

**Supplementary figure 11: GO annotation of top30 identified DE-lncRNA.** (A) Top30 GO Terms of total; (B) Top30 GO Terms of down; (C) Top30 GO Terms of up; (D) GO classification.

### H-vs-C(Total): KEGG Pathway Classification

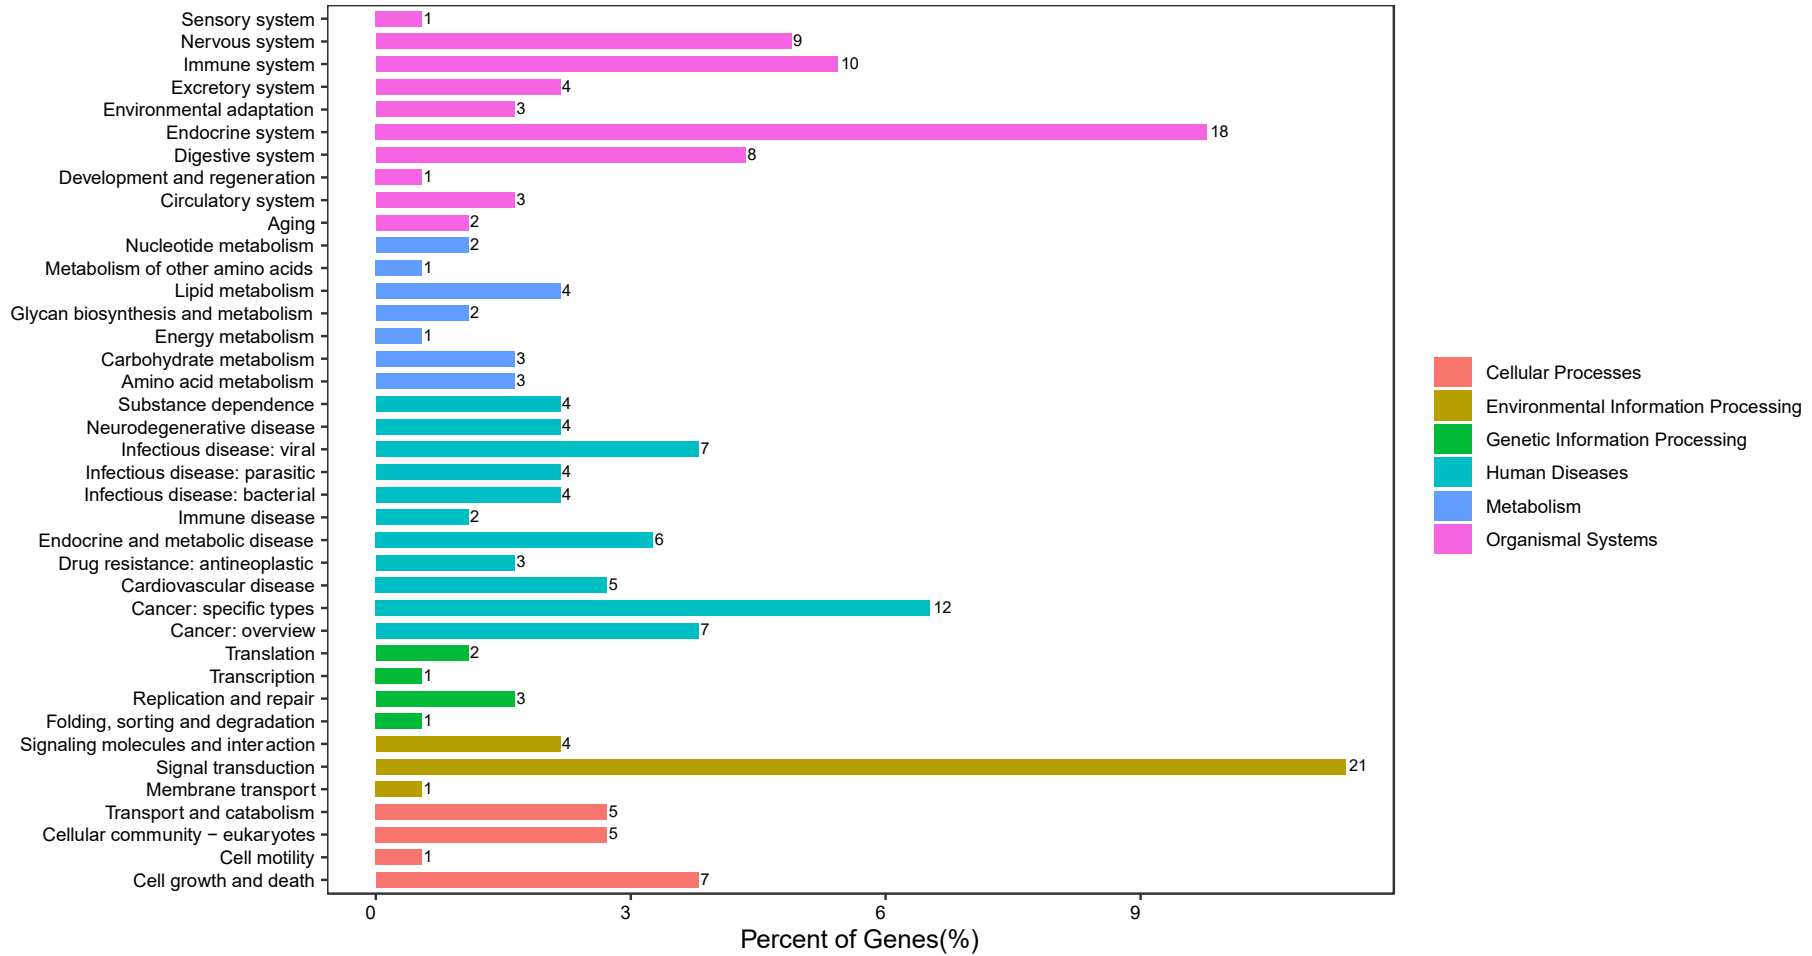

**Supplementary figure 12: KEGG annotation of identified DE-lncRNA.**

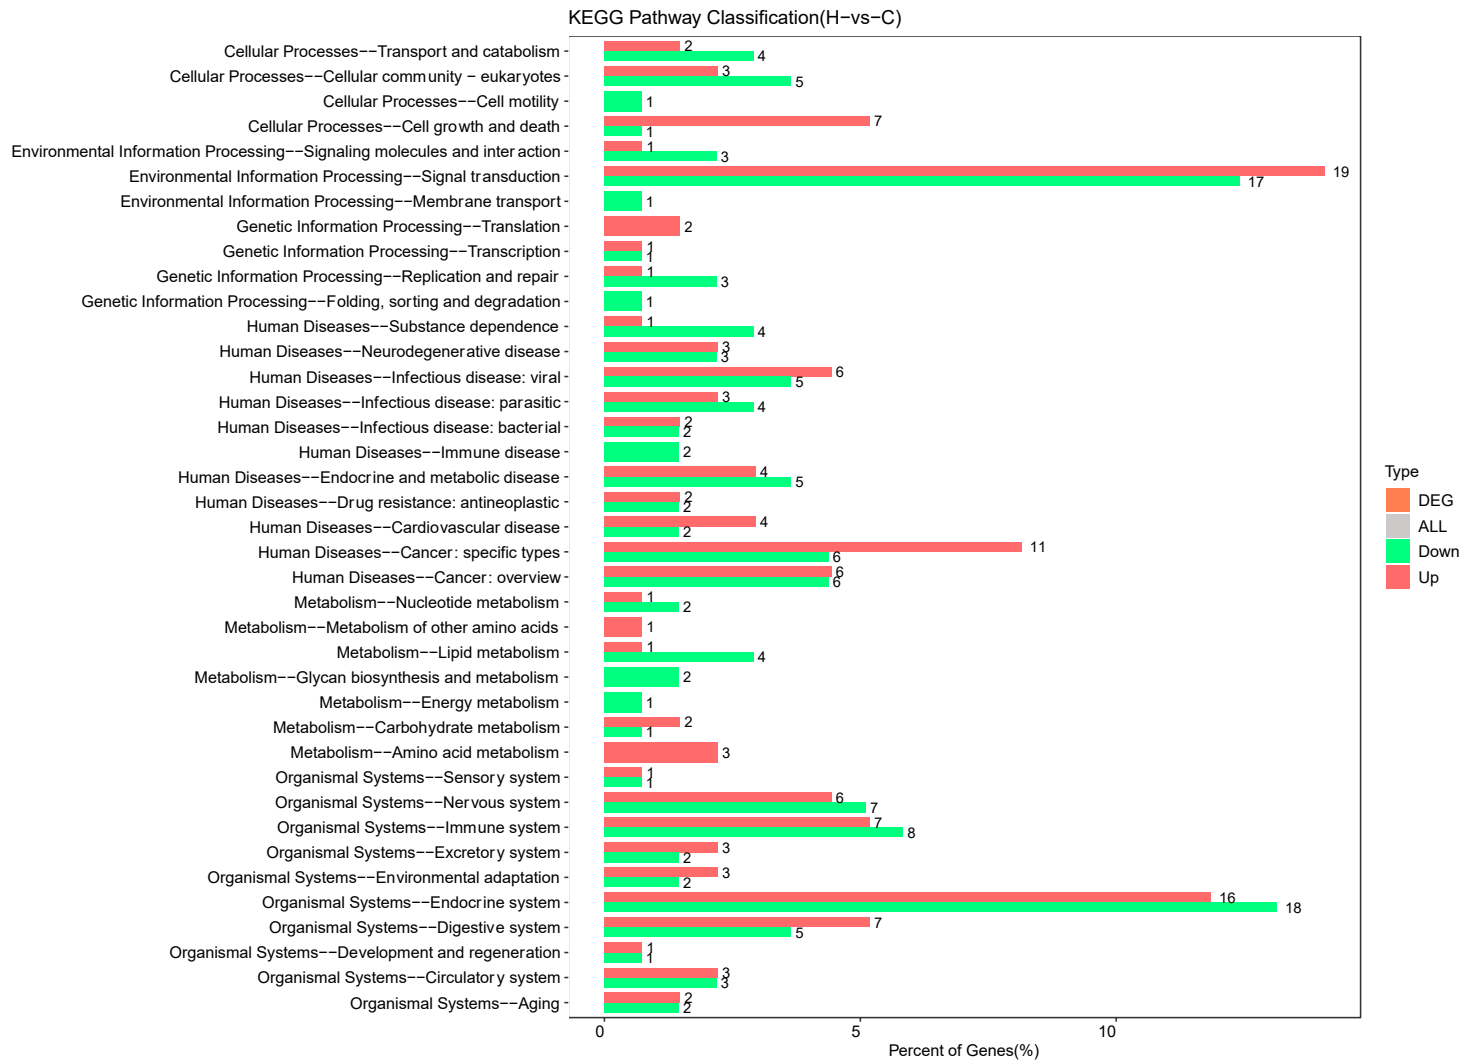

Supplementary figure 13: KEGG annotation of all circRNA.

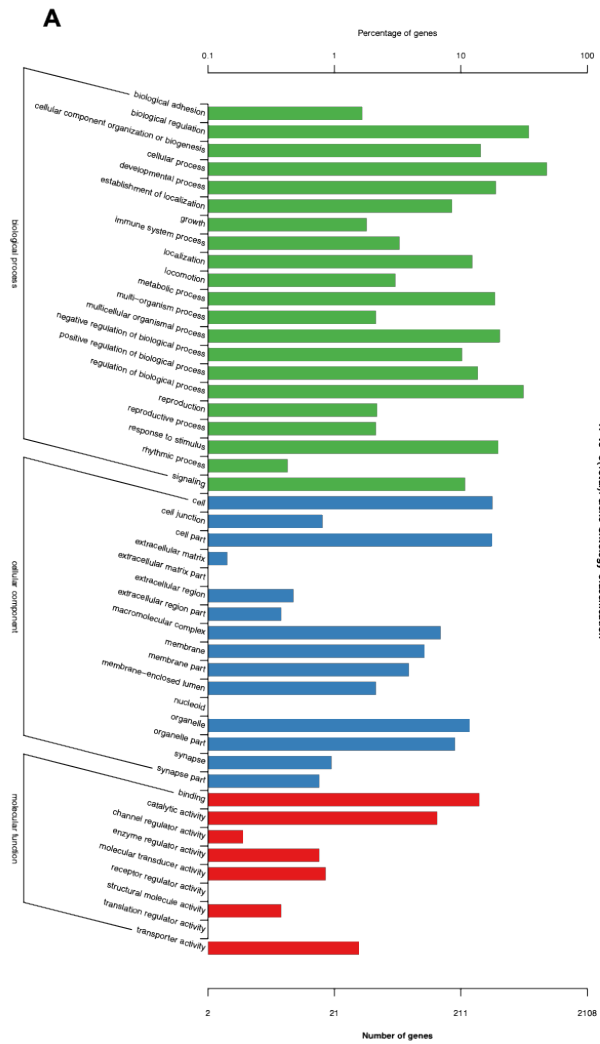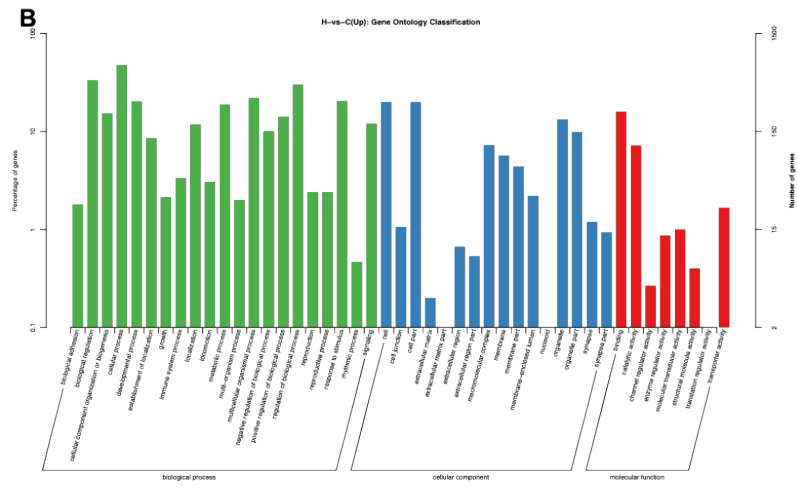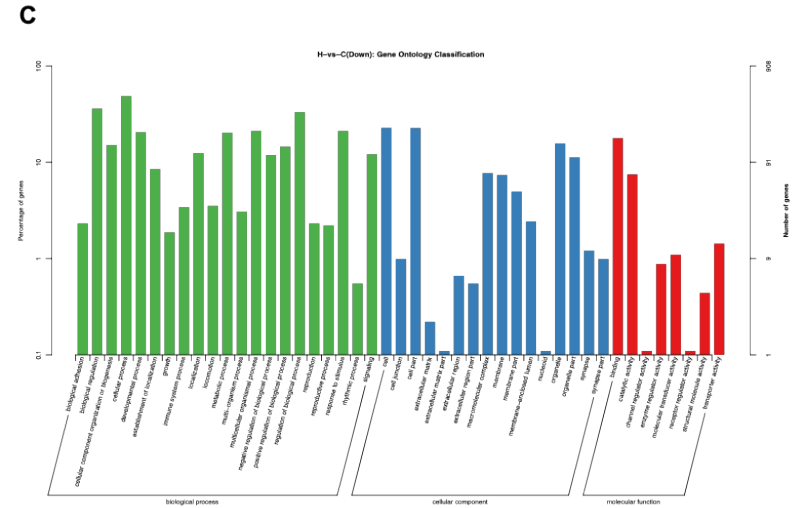

Supplementary figure 14: GO annotation of total identified DE-circRNA (A-C).

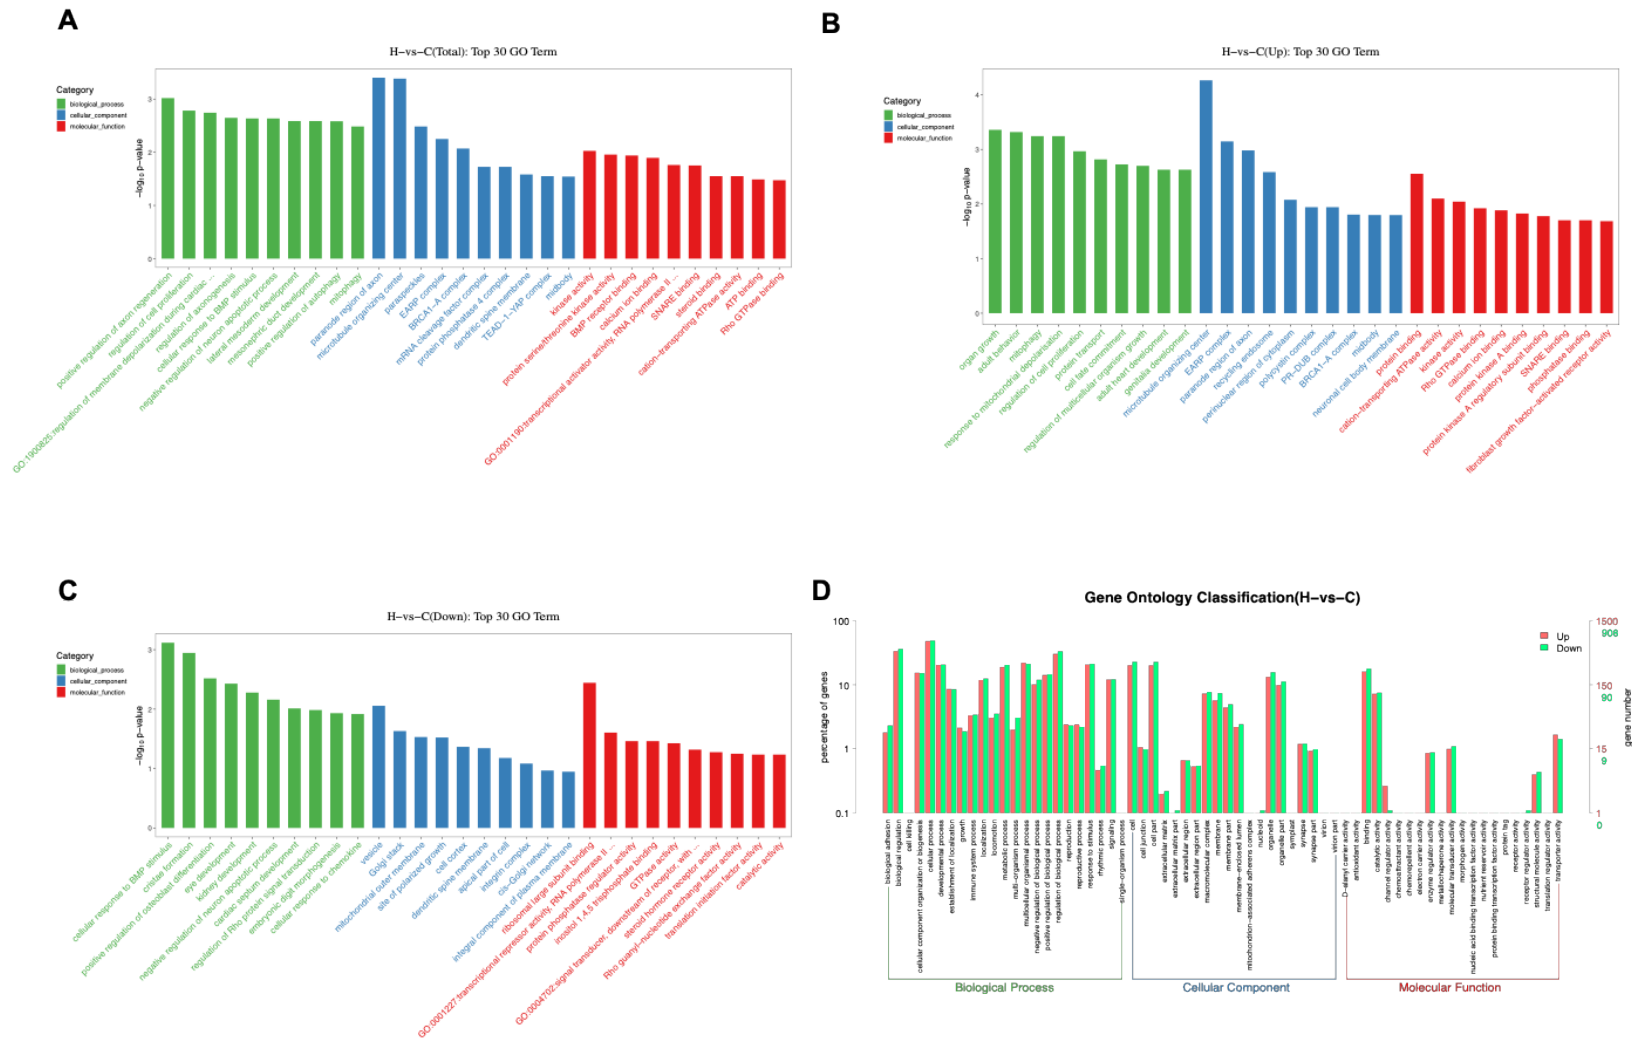

**Supplementary figure 15: GO annotation of top30 identified DE-circRNA.** (A) Top30 GO Terms of total; (B) Top30 GO Terms of down; (C) Top30 GO Terms of up; (D) GO classification.



### H-vs-C(Up): KEGG Pathway Classification

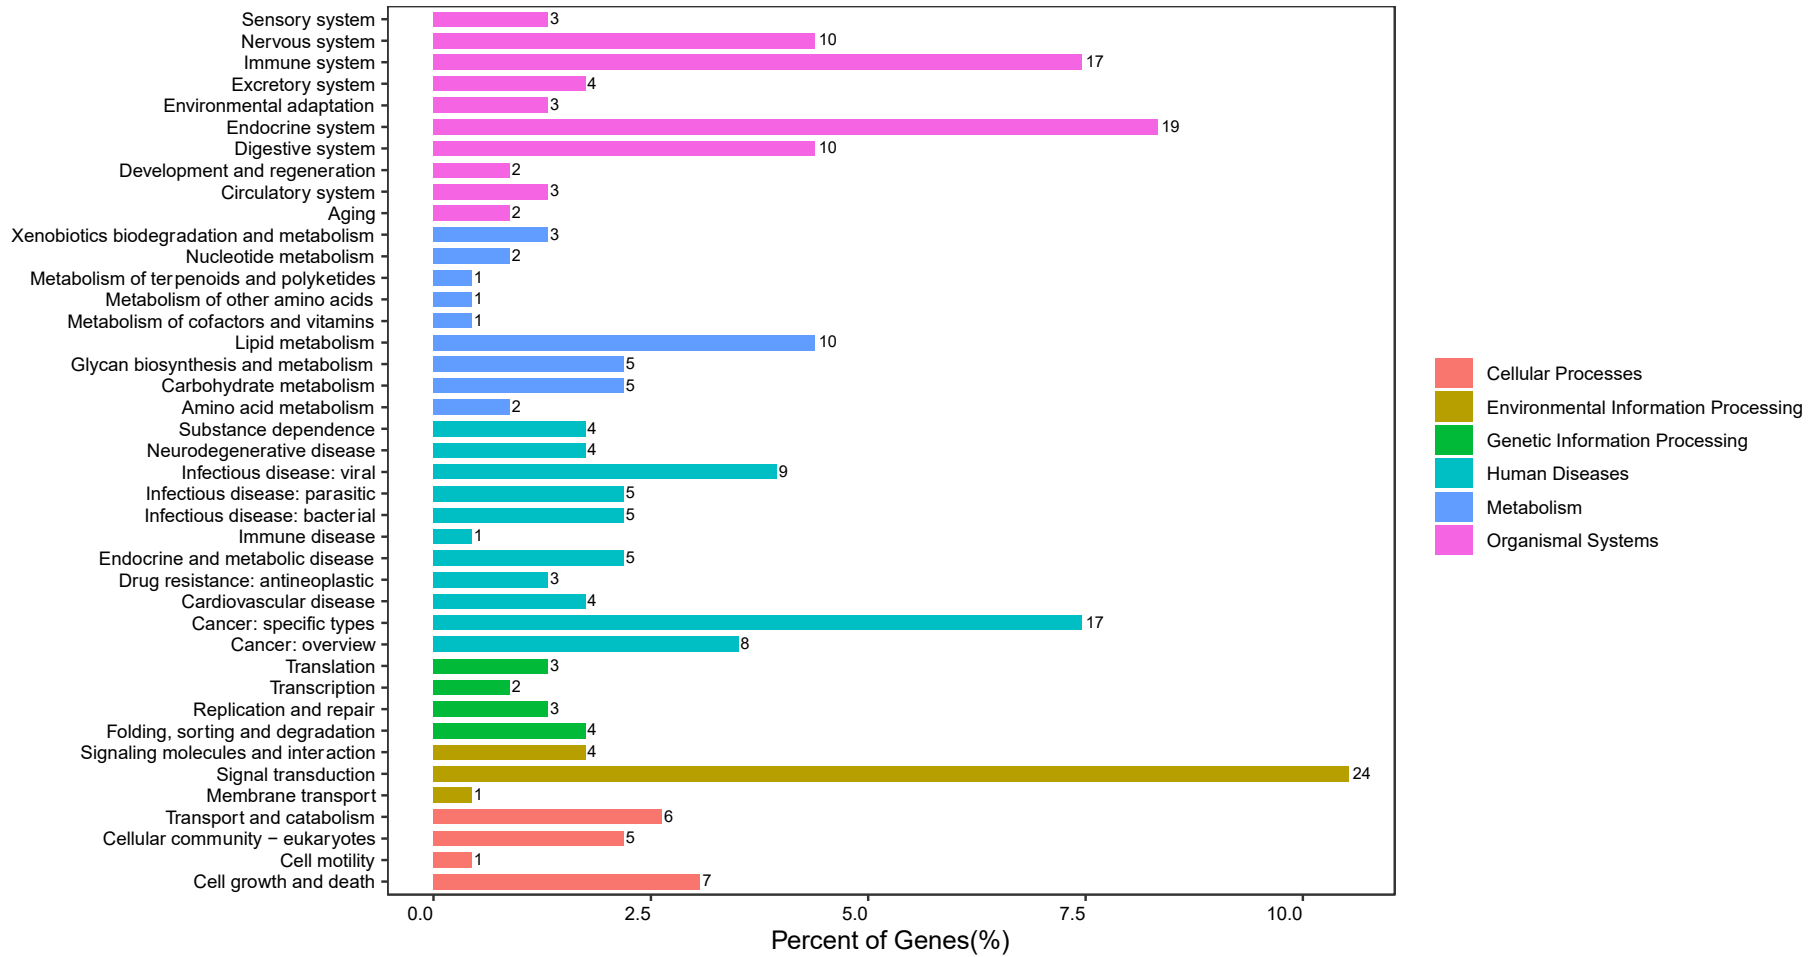

Supplementary figure 16: KEGG annotation of identified DE-circRNA.

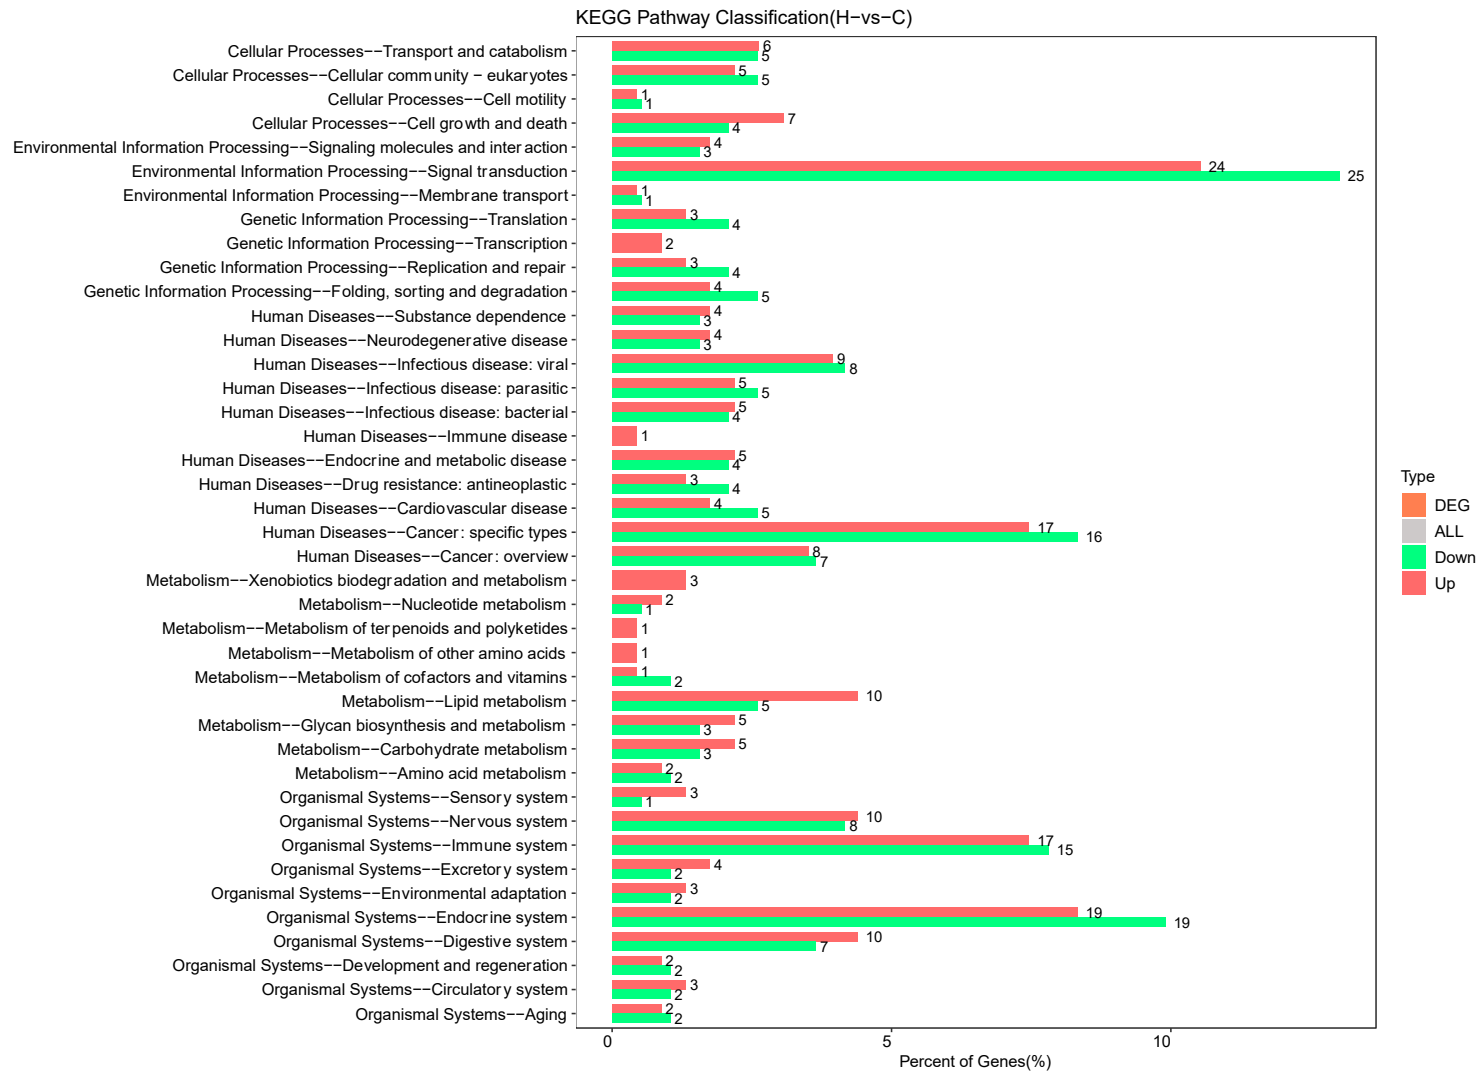

Supplementary figure 17: KEGG annotation of all circRNA.



**Supplementary table 1:** The sequence of primers for qRT-PCR

| <b>RNA</b>     | <b>Forward primer (5' →3')</b> | <b>Reverse primer (5' →3')</b> |
|----------------|--------------------------------|--------------------------------|
| CNTN5          | AGGAGACATGGAGTCAGCGA           | GCCGTCTTAGGAACTGCCTC           |
| circRNA_4291   | ATCGAGGAGTTCGCAGAGTA           | GCAGTCTTCATAGGTGTGATCC         |
| circRNA_8678   | GGAGTAATTCGTCCAGTACCTATAAA     | CATCTAGTGCCTGCTCAGAAA          |
| TCONS_00011370 | GGGTCTTGGACACCATAAGTTT         | GATGTCTTCCAGCAAGGAGAAG         |
| TCONS_00018620 | CGCCCATTCATCCACTCTT            | AGCAAAGGATGGCCTTGT             |
| TCONS_00020441 | CCCTTCCTTCCTGTGGTTATTT         | GTCTGTTGGTGTGTCCATGT           |
| XR_001835895.1 | AGTCTGGTGGTCGTTTAATCAG         | GGTTTACAGGGACCCATCTTT          |
| GAPDH          | TTCACCACCATGGAGAAGGC           | AGTGATGGCATGGACTGTGG           |

**Supplementary table 2:** The comparison between high-dose EWH treated and the control female SHR for the identified DE-mRNA

| gene_id  | BaseMean   | lfcSE      | stat        | FoldChange | log2FoldChange | pValue     | qValue     | Regulation |
|----------|------------|------------|-------------|------------|----------------|------------|------------|------------|
| A4galt   | 130.941612 | 0.65576872 | 2.86382712  | 3.67567257 | 1.87800826     | 0.00418556 | 0.12329154 | Up         |
| Aatk     | 3208.38276 | 0.49089423 | 2.32286667  | 2.2042408  | 1.14028184     | 0.02018632 | 0.23469601 | Up         |
| Abat     | 297.870743 | 0.56973817 | 3.40574283  | 3.83807173 | 1.94038168     | 0.00065984 | 0.05960358 | Up         |
| Abcb11   | 377.905163 | 0.99129269 | -3.08055561 | 0.12043008 | -3.05373227    | 0.00206615 | 0.09744337 | Down       |
| Abcb1a   | 119.437859 | 0.56715017 | 3.77873062  | 4.41712515 | 2.14310771     | 0.00015763 | 0.03139086 | Up         |
| Abcg2    | 195.711592 | 0.37211521 | 3.54007853  | 2.49202243 | 1.31731706     | 0.00040001 | 0.0474496  | Up         |
| Ablim2   | 205.814021 | 0.63132162 | 2.68436811  | 3.23709481 | 1.69469962     | 0.0072667  | 0.15052566 | Up         |
| Acaa1b   | 70.4379801 | 1.23294902 | -2.26492524 | 0.14433196 | -2.79253735    | 0.02351727 | 0.25181326 | Down       |
| Acaa2    | 16163.1195 | 0.77835392 | -1.96764148 | 0.34591238 | -1.53152146    | 0.0491093  | 0.34834866 | Down       |
| Acadl    | 19455.7058 | 0.66633584 | -2.23757177 | 0.35577221 | -1.49097426    | 0.02524899 | 0.25762099 | Down       |
| Acadm    | 15029.8179 | 0.64937749 | -2.09428823 | 0.38958671 | -1.35998364    | 0.03623431 | 0.30730898 | Down       |
| Acadv1   | 13551.7462 | 0.58242156 | -1.99906696 | 0.44618079 | -1.1642997     | 0.04560111 | 0.33818752 | Down       |
| Ache     | 811.645592 | 0.63804324 | 2.47304727  | 2.98537279 | 1.5779111      | 0.01339664 | 0.19691729 | Up         |
| Acot11   | 3640.45722 | 0.62582111 | -2.74343402 | 0.3042019  | -1.71689891    | 0.00608003 | 0.14081919 | Down       |
| Acot2    | 2661.63803 | 0.66435141 | -2.2119747  | 0.36110029 | -1.46952851    | 0.02696841 | 0.26405882 | Down       |
| Acot4    | 50.1774346 | 0.88299242 | -2.45955531 | 0.22193842 | -2.17176869    | 0.01391093 | 0.20060136 | Down       |
| Acpp     | 76.3847742 | 1.03375897 | 2.41010445  | 5.62349521 | 2.4914671      | 0.01594795 | 0.21372693 | Up         |
| Acsbg1   | 183.818029 | 1.02752743 | 2.63447704  | 6.5296127  | 2.70699742     | 0.0084267  | 0.16168213 | Up         |
| Acsl5    | 11535.2092 | 0.75275995 | -2.37950856 | 0.28893187 | -1.79119873    | 0.01733574 | 0.22243936 | Down       |
| Acsl6    | 145.931831 | 0.4113419  | 2.99553055  | 2.34922877 | 1.23218721     | 0.00273968 | 0.10619684 | Up         |
| Acsm1    | 42.1014633 | 0.48724022 | 3.3006488   | 3.04873095 | 1.60820884     | 0.00096462 | 0.07134    | Up         |
| Actn2    | 179.720193 | 0.63519527 | -3.86692989 | 0.18221889 | -2.45625559    | 0.00011021 | 0.02545946 | Down       |
| Actn3    | 93.1165288 | 0.68906754 | 3.17563127  | 4.55744238 | 2.18822442     | 0.00149511 | 0.08474573 | Up         |
| Adam23   | 3033.52551 | 0.43520934 | 3.08978985  | 2.53978331 | 1.34470541     | 0.00200298 | 0.09616605 | Up         |
| Adamts20 | 196.513885 | 0.73955629 | 3.16773     | 5.07256221 | 2.34271465     | 0.00153634 | 0.08617255 | Up         |
| Adarb2   | 35.5649206 | 0.66153416 | 3.22713236  | 4.39193986 | 2.1348583      | 0.00125038 | 0.07811958 | Up         |
| Adecy1   | 1644.14742 | 0.64203324 | 3.18213507  | 4.12112002 | 2.04303648     | 0.00146194 | 0.08442682 | Up         |
| Adecy2   | 245.578491 | 0.48353616 | 2.47747678  | 2.2941339  | 1.1979496      | 0.0132315  | 0.19570985 | Up         |
| Adecy8   | 44.2931763 | 1.13487581 | 2.30102499  | 6.1108692  | 2.6113776      | 0.02139022 | 0.24103124 | Up         |

|           |            |            |             |            |             |            |            |      |
|-----------|------------|------------|-------------|------------|-------------|------------|------------|------|
| Adcyap1r1 | 1164.05678 | 0.67020996 | 2.5623779   | 3.28827551 | 1.71733118  | 0.01039581 | 0.17464966 | Up   |
| Add2      | 803.772623 | 0.92949086 | 2.79893756  | 6.06953874 | 2.60158688  | 0.00512711 | 0.13117495 | Up   |
| Adgra1    | 52.8468189 | 0.83198074 | 2.18505024  | 3.52572443 | 1.81791972  | 0.02888516 | 0.27385004 | Up   |
| Adgrb1    | 285.529672 | 0.52033024 | 3.58639473  | 3.64548213 | 1.86610963  | 0.00033528 | 0.04392686 | Up   |
| Adgrb2    | 176.827231 | 0.51559529 | 2.80772008  | 2.72762867 | 1.44764726  | 0.00498936 | 0.13034697 | Up   |
| Adgrb3    | 474.645222 | 0.94354892 | 2.35803234  | 4.67484605 | 2.22491886  | 0.01837209 | 0.22746153 | Up   |
| Adgrg6    | 1423.87303 | 0.35643038 | 3.55431184  | 2.40638041 | 1.26686473  | 0.00037897 | 0.04667955 | Up   |
| Adgrl3    | 1196.2038  | 0.50786238 | 3.03540644  | 2.91110875 | 1.54156873  | 0.00240212 | 0.10258232 | Up   |
| Adprh1l   | 266.632782 | 0.42381051 | -2.82562346 | 0.43602147 | -1.19752892 | 0.00471887 | 0.12835359 | Down |
| Adra2b    | 115.090771 | 0.53481547 | 2.61708991  | 2.63839426 | 1.39966017  | 0.0088683  | 0.16457911 | Up   |
| Adra2c    | 79.1092854 | 0.73815947 | 2.58067966  | 3.7449673  | 1.90495312  | 0.0098606  | 0.17072263 | Up   |
| Adrb1     | 193.074089 | 0.50289288 | -2.29575201 | 0.44921645 | -1.15451734 | 0.02169006 | 0.24233104 | Down |
| Adssl1    | 760.941219 | 0.86644514 | -2.71500849 | 0.1958192  | -2.3524059  | 0.00662741 | 0.1458793  | Down |
| Adtrp     | 300.323506 | 1.05925282 | -2.77423475 | 0.13043329 | -2.93861599 | 0.00553317 | 0.13571584 | Down |
| Agtr2     | 37.3899653 | 0.99748197 | 2.57295422  | 5.92360508 | 2.56647546  | 0.01008345 | 0.17266943 | Up   |
| Aim1l     | 38.6875501 | 0.6208505  | 3.03817157  | 3.69673168 | 1.88625033  | 0.00238018 | 0.10258232 | Up   |
| Akain1    | 5.87421228 | 2.02634106 | 2.90044598  | 58.7816019 | 5.87729277  | 0.00372632 | 0.11876593 | Up   |
| Alas1     | 3503.65315 | 0.53475042 | -2.17557588 | 0.44646218 | -1.16339012 | 0.02958699 | 0.27792721 | Down |
| Aldh1b1   | 6.26862813 | 1.02049914 | 2.11910518  | 4.47703942 | 2.16254502  | 0.03408158 | 0.30021887 | Up   |
| Aldh5a1   | 2322.97362 | 0.51775172 | -2.40204165 | 0.4222996  | -1.2436612  | 0.01630385 | 0.21651318 | Down |
| Aldoc     | 1599.51034 | 0.50855387 | 3.46199675  | 3.38841794 | 1.76061183  | 0.00053618 | 0.05472814 | Up   |
| Alk       | 154.302232 | 0.68981464 | 2.86787331  | 3.94028774 | 1.97830099  | 0.00413241 | 0.1229637  | Up   |
| Alox12    | 861.910762 | 0.86052811 | -2.68071123 | 0.2021044  | -2.30682737 | 0.00734659 | 0.15102659 | Down |
| Alpk2     | 12.443248  | 0.64435067 | -2.48083808 | 0.33021335 | -1.59852967 | 0.01310739 | 0.19537063 | Down |
| Als2cr12  | 35.2744687 | 0.47845196 | -2.75489526 | 0.40106694 | -1.31808504 | 0.00587109 | 0.13824882 | Down |
| Amer2     | 19.0223148 | 1.2863187  | 1.96559724  | 5.76925283 | 2.52838449  | 0.04934515 | 0.34887938 | Up   |
| Amer3     | 37.1237642 | 1.38660363 | 2.6498218   | 12.7661581 | 3.67425252  | 0.00805342 | 0.15757842 | Up   |
| Angpt4    | 170.80963  | 0.31112223 | 3.78124201  | 2.26016556 | 1.17642846  | 0.00015605 | 0.03139086 | Up   |
| Ank3      | 3532.03748 | 0.39538131 | 2.90964894  | 2.21978632 | 1.15042081  | 0.00361835 | 0.11765336 | Up   |
| Ankk1     | 11.6562066 | 1.346015   | 3.63467339  | 29.6986392 | 4.89232492  | 0.00027833 | 0.03982596 | Up   |
| Ankrd2    | 7.25518877 | 0.8022954  | -2.24839941 | 0.28640319 | -1.80388052 | 0.02455073 | 0.25464478 | Down |
| Ankrd34b  | 10.1377028 | 1.09217143 | 2.46086953  | 6.442816   | 2.68769139  | 0.01386008 | 0.20026954 | Up   |

|          |            |            |             |            |             |            |            |      |
|----------|------------|------------|-------------|------------|-------------|------------|------------|------|
| Ankrd55  | 189.934314 | 0.45820477 | 2.95746372  | 2.558191   | 1.35512398  | 0.00310181 | 0.11220917 | Up   |
| Ankrd9   | 947.326967 | 0.46107586 | -2.41896966 | 0.46158604 | -1.11532851 | 0.01556454 | 0.21133104 | Down |
| Anks1b   | 106.336404 | 0.93234776 | 2.22995349  | 4.22541236 | 2.07909214  | 0.02575053 | 0.2586687  | Up   |
| Ano1     | 3675.09179 | 0.31261682 | -3.31663097 | 0.48739568 | -1.03683462 | 0.0009111  | 0.0692435  | Down |
| Ano2     | 67.7694222 | 0.36081125 | -3.30650946 | 0.43738456 | -1.1930258  | 0.00094466 | 0.07027322 | Down |
| Ap3b2    | 282.604795 | 1.03808214 | 2.88397503  | 7.96571008 | 2.99380297  | 0.0039269  | 0.1198054  | Up   |
| Apba2    | 222.868866 | 0.81967602 | 2.8247115   | 4.97724803 | 2.31534828  | 0.00473232 | 0.12835359 | Up   |
| Apln     | 162.86783  | 0.71891854 | -2.31484766 | 0.31552213 | -1.66418691 | 0.02062127 | 0.237267   | Down |
| Aplp1    | 463.526928 | 0.60505465 | 2.59190394  | 2.96543453 | 1.56824352  | 0.00954464 | 0.16857431 | Up   |
| Apod     | 852.236855 | 0.74625941 | 5.57617962  | 17.8924184 | 4.16127649  | 2.46E-08   | 8.63E-05   | Up   |
| Apoe     | 10537.6576 | 0.2082801  | 5.09942993  | 2.08798269 | 1.06210975  | 3.41E-07   | 0.00085442 | Up   |
| Aqp4     | 5.41546382 | 1.95864442 | 2.4204088   | 26.7361565 | 4.74072018  | 0.01550307 | 0.21098593 | Up   |
| Arc      | 844.991134 | 0.36520097 | -4.31101721 | 0.33578561 | -1.57438768 | 1.63E-05   | 0.00750774 | Down |
| Arf6     | 4205.5084  | 0.43730887 | -2.7440697  | 0.43527347 | -1.20000601 | 0.00606827 | 0.14073245 | Down |
| Arhgap36 | 2.15119431 | 1.49417972 | 2.24273305  | 10.2038821 | 3.35104623  | 0.02491403 | 0.25638381 | Up   |
| Arhgef16 | 122.692473 | 0.43729399 | 2.85380407  | 2.37503928 | 1.24795138  | 0.00431992 | 0.12535612 | Up   |
| Arrdc5   | 2.10295901 | 1.00251483 | -2.16532707 | 0.22209172 | -2.17077249 | 0.03036265 | 0.28114274 | Down |
| Asb18    | 5.25450632 | 0.81922654 | 2.16460234  | 3.41834896 | 1.77329968  | 0.03041815 | 0.28128299 | Up   |
| Asip     | 5.82803788 | 0.72733823 | -2.05164668 | 0.35545996 | -1.49224105 | 0.04020401 | 0.32080195 | Down |
| Aspdh    | 13.5738218 | 0.7661109  | 2.37844531  | 3.53608479 | 1.82215287  | 0.01738582 | 0.22259186 | Up   |
| Aspg     | 543.313357 | 1.29059804 | -1.99901178 | 0.16725014 | -2.57992069 | 0.04560708 | 0.33818752 | Down |
| Asphd2   | 22.0063922 | 1.30547391 | 2.64142654  | 10.9155539 | 3.44831343  | 0.00825577 | 0.15994638 | Up   |
| Atcay    | 206.351457 | 1.30695363 | 2.4446633   | 9.15818412 | 3.19506157  | 0.01449874 | 0.20360887 | Up   |
| Atf3     | 8480.96679 | 0.6552109  | -2.69944167 | 0.29347233 | -1.76870362 | 0.00694559 | 0.14818674 | Down |
| Atl1     | 641.875154 | 0.46341735 | 2.84955309  | 2.49758252 | 1.32053235  | 0.00437807 | 0.12600229 | Up   |
| Atn1     | 77.7861311 | 0.57332937 | 2.03362366  | 2.24378768 | 1.16593617  | 0.04198955 | 0.32836019 | Up   |
| Atp10b   | 101.82526  | 0.82763217 | 2.70395497  | 4.71703438 | 2.23788012  | 0.00685196 | 0.14741785 | Up   |
| Atp1a3   | 412.409703 | 0.9392296  | 2.4456184   | 4.91433834 | 2.29699719  | 0.0144604  | 0.20345185 | Up   |
| Atp2a1   | 326.787545 | 0.68397579 | 2.99573683  | 4.13822319 | 2.04901146  | 0.00273783 | 0.10619684 | Up   |
| Atp2b2   | 364.482357 | 0.89751607 | 2.89834924  | 6.06839507 | 2.60131501  | 0.00375133 | 0.1187952  | Up   |
| Atp2b3   | 264.958044 | 0.81588278 | 2.7163212   | 4.64667806 | 2.21619969  | 0.00660118 | 0.1458793  | Up   |
| Atp6v1g2 | 161.498641 | 0.78047137 | 2.6097174   | 4.10337134 | 2.03680972  | 0.0090617  | 0.16516558 | Up   |

|            |            |            |             |            |             |            |            |      |
|------------|------------|------------|-------------|------------|-------------|------------|------------|------|
| Atp8a2     | 594.0558   | 0.91010844 | 2.72446498  | 5.57726787 | 2.47955856  | 0.00644058 | 0.1442229  | Up   |
| Avil       | 613.57977  | 0.54065613 | 3.76811121  | 4.10463073 | 2.03725244  | 0.00016449 | 0.03158787 | Up   |
| B3galt5    | 30.9992323 | 1.0074257  | 3.00453563  | 8.15026186 | 3.02684641  | 0.00265987 | 0.1046542  | Up   |
| B3gat1     | 2.49268219 | 1.32715245 | 2.68476755  | 11.8194897 | 3.56309584  | 0.00725803 | 0.15052566 | Up   |
| B3gnt4     | 45.7429676 | 0.96178009 | -3.09472126 | 0.12705796 | -2.97644129 | 0.00196998 | 0.09602565 | Down |
| B4galnt4   | 65.4284858 | 0.80937233 | 2.82852885  | 4.88830055 | 2.28933299  | 0.00467625 | 0.12835359 | Up   |
| Baalc      | 62.4800953 | 0.77582675 | 2.11642067  | 3.1209295  | 1.64197577  | 0.03430905 | 0.30041322 | Up   |
| Basp1      | 162.934388 | 0.59893689 | 3.2893454   | 3.91798074 | 1.9701103   | 0.00100421 | 0.07315294 | Up   |
| Bcas1      | 41.8609255 | 0.75279034 | 2.20049206  | 3.15252796 | 1.65650916  | 0.027772   | 0.26833532 | Up   |
| Begain     | 96.9762755 | 0.73678132 | 2.85854943  | 4.30533596 | 2.10612582  | 0.00425583 | 0.12463794 | Up   |
| Bex2       | 77.0424072 | 1.1071067  | 2.35345763  | 6.08614495 | 2.60552869  | 0.01859973 | 0.22819978 | Up   |
| Bfsp2      | 13.8817262 | 1.37642731 | -2.75560644 | 0.07214824 | -3.79289196 | 0.00585834 | 0.13824882 | Down |
| Bin2       | 188.792276 | 0.60640014 | -1.98410844 | 0.43432183 | -1.20316363 | 0.04724375 | 0.34162282 | Down |
| Bmp10      | 4.63289635 | 0.86596353 | -2.35998369 | 0.24254766 | -2.04365981 | 0.01827574 | 0.22717167 | Down |
| Bpifa1     | 18.0925041 | 1.65058943 | -2.28172364 | 0.07349608 | -3.76618892 | 0.02250566 | 0.24694337 | Down |
| Bpifb5     | 9.38307365 | 1.1812738  | -2.13104536 | 0.17466373 | -2.51734806 | 0.03308541 | 0.29380241 | Down |
| Brinp1     | 30.4184518 | 0.71875706 | 2.7739527   | 3.98284155 | 1.99379808  | 0.00553797 | 0.13571584 | Up   |
| Brinp2     | 146.868011 | 0.73037467 | 3.94883415  | 7.38259712 | 2.88412843  | 7.85E-05   | 0.01998146 | Up   |
| Brms1      | 39.9522936 | 0.66376561 | 2.91031344  | 3.81521929 | 1.93176598  | 0.00361066 | 0.11765336 | Up   |
| Btbd16     | 28.4165566 | 0.50435364 | 2.35732164  | 2.27982604 | 1.18892375  | 0.0184073  | 0.22773677 | Up   |
| Btbd18     | 7.70355913 | 0.53429241 | 2.8051608   | 2.82602869 | 1.49877611  | 0.00502915 | 0.1309732  | Up   |
| C1H19orf84 | 216.503576 | 1.02936754 | -2.38958927 | 0.18177609 | -2.45976564 | 0.01686722 | 0.21967432 | Down |
| C6         | 1335.8395  | 0.39573197 | 4.07865951  | 3.06111225 | 1.61405595  | 4.53E-05   | 0.01389776 | Up   |
| Cacna1b    | 472.597807 | 1.2905717  | 2.39301055  | 8.50523841 | 3.08835168  | 0.01671076 | 0.218623   | Up   |
| Cacna1s    | 18.3061311 | 0.83412427 | 2.97858985  | 5.59645813 | 2.48451407  | 0.00289578 | 0.10932975 | Up   |
| Cacng4     | 43.5207392 | 0.83438526 | 2.27553777  | 3.72870631 | 1.89867517  | 0.02287369 | 0.24891719 | Up   |
| Cacng5     | 5.03586814 | 1.3312327  | 2.73278897  | 12.4491732 | 3.63797802  | 0.00628006 | 0.14333382 | Up   |
| Cacng7     | 93.1758701 | 0.66652403 | 3.0319278   | 4.05823594 | 2.02085274  | 0.00242997 | 0.10258232 | Up   |
| Cacng8     | 5.37866646 | 0.93885401 | 2.57579021  | 5.34537423 | 2.41829096  | 0.01000113 | 0.17196851 | Up   |
| Cadm1      | 425.636071 | 0.47914847 | 3.66095391  | 3.37325286 | 1.75414047  | 0.00025128 | 0.03847229 | Up   |
| Cadm2      | 466.667347 | 0.62157743 | 2.88401831  | 3.4644845  | 1.7926407   | 0.00392636 | 0.1198054  | Up   |
| Cadm4      | 459.842842 | 0.74325732 | 2.33056853  | 3.32236856 | 1.73221212  | 0.01977612 | 0.23375308 | Up   |



|         |            |            |             |            |             |            |            |      |
|---------|------------|------------|-------------|------------|-------------|------------|------------|------|
| Cadps   | 1046.05209 | 0.48569571 | 2.06861541  | 2.00655073 | 1.00471763  | 0.03858219 | 0.31497635 | Up   |
| Camk1g  | 23.0239243 | 1.26215266 | 2.71483513  | 10.7520241 | 3.42653637  | 0.00663088 | 0.1458793  | Up   |
| Camk2a  | 44.2551802 | 0.84556522 | 2.70546788  | 4.8825998  | 2.28764953  | 0.00682082 | 0.14710859 | Up   |
| Camk2b  | 680.75285  | 0.49746917 | 2.17327937  | 2.11570648 | 1.08113949  | 0.0297593  | 0.27823225 | Up   |
| Camk4   | 320.523122 | 0.8414613  | 2.77716953  | 5.05209118 | 2.33688068  | 0.00548346 | 0.13540942 | Up   |
| Capn11  | 8.68782834 | 1.29449411 | -2.49897653 | 0.10621722 | -3.23491041 | 0.01245526 | 0.19164284 | Down |
| Car8    | 137.956287 | 0.54559886 | -1.97130662 | 0.47449256 | -1.07554264 | 0.04868881 | 0.34691312 | Down |
| Carmil3 | 139.663685 | 0.58749876 | 2.01902137  | 2.27548261 | 1.18617256  | 0.043485   | 0.33322536 | Up   |
| Cartpt  | 8.82098132 | 1.58130515 | 2.34960764  | 13.135932  | 3.71544666  | 0.01879321 | 0.22912054 | Up   |
| Cbln2   | 251.497483 | 0.59203034 | -2.29007645 | 0.39071953 | -1.35579473 | 0.02201689 | 0.24477297 | Down |
| Ccdc13  | 13.0958388 | 0.62924746 | 2.90655617  | 3.55276702 | 1.82894308  | 0.00365431 | 0.11765336 | Up   |
| Ccdc184 | 32.0883453 | 1.03899245 | 2.60967423  | 6.54971358 | 2.71143182  | 0.00906285 | 0.16516558 | Up   |
| Ccl17   | 5.98242831 | 0.80941962 | -2.18338671 | 0.29376287 | -1.76727604 | 0.02900734 | 0.27452988 | Down |
| Ccl5    | 92.7615981 | 0.38416876 | -3.2529047  | 0.42054604 | -1.24966436 | 0.00114232 | 0.07539299 | Down |
| Ccl9    | 8.07631444 | 0.71372405 | -1.98756279 | 0.37408257 | -1.41857136 | 0.04686007 | 0.34031564 | Down |
| Cd226   | 2117.33887 | 1.12850299 | -2.53773349 | 0.13737203 | -2.86383984 | 0.01115729 | 0.18175249 | Down |
| Cd24    | 651.173192 | 0.89390146 | 3.55853298  | 9.06921602 | 3.18097784  | 0.00037293 | 0.04667955 | Up   |
| Cd69    | 25.1691804 | 0.55775763 | -2.33650261 | 0.40522577 | -1.30320216 | 0.01946506 | 0.23287105 | Down |
| Cd84    | 291.109789 | 0.7664753  | -2.56736734 | 0.25563838 | -1.96782365 | 0.0102474  | 0.1737349  | Down |
| Cdh1    | 426.656026 | 0.97784586 | 2.14121086  | 4.26863312 | 2.09377417  | 0.03225704 | 0.29085374 | Up   |
| Cdh12   | 30.5606042 | 1.59401575 | 3.03247166  | 28.5181324 | 4.8338076   | 0.0024256  | 0.10258232 | Up   |
| Cdh18   | 48.463879  | 0.60715623 | 2.01505015  | 2.33504483 | 1.22345025  | 0.04389939 | 0.33496951 | Up   |
| Cdh19   | 2173.82819 | 0.68018637 | 2.87344683  | 3.87576039 | 1.95447938  | 0.00406019 | 0.12205611 | Up   |
| Cdh20   | 32.3477055 | 0.76221549 | 2.25020239  | 3.28328302 | 1.71513911  | 0.0244361  | 0.25464478 | Up   |
| Cdh4    | 134.169643 | 0.52935135 | 2.07168626  | 2.13857517 | 1.09664992  | 0.03829471 | 0.31443816 | Up   |
| Cdhr4   | 6.23599578 | 0.67077545 | 2.32203026  | 2.94355767 | 1.55756089  | 0.02023131 | 0.23477935 | Up   |
| Cdk5r1  | 73.2131292 | 0.68438422 | 2.17274232  | 2.80303653 | 1.48699055  | 0.02979972 | 0.27827863 | Up   |
| Celf3   | 320.267012 | 0.60914383 | 2.4614823   | 2.82724471 | 1.49939676  | 0.01383642 | 0.20009245 | Up   |
| Celf4   | 174.52006  | 0.9060973  | 2.78049899  | 5.73344644 | 2.51940262  | 0.00542754 | 0.13489233 | Up   |
| Celf5   | 83.8338532 | 0.52360099 | 3.01770353  | 2.98984888 | 1.58007257  | 0.00254698 | 0.10361769 | Up   |
| Celf6   | 241.848923 | 1.37257673 | 2.06585093  | 7.13809406 | 2.83553891  | 0.03884256 | 0.31526581 | Up   |
| Celsr1  | 781.169692 | 0.40400871 | 2.97052592  | 2.29758519 | 1.20011835  | 0.0029729  | 0.11104742 | Up   |

|         |            |            |             |            |             |            |            |      |
|---------|------------|------------|-------------|------------|-------------|------------|------------|------|
| Celsr2  | 514.624296 | 0.57055179 | 2.65178944  | 2.8539958  | 1.51298321  | 0.00800665 | 0.15723117 | Up   |
| Celsr3  | 346.333094 | 1.24110788 | 2.37697371  | 7.72792342 | 2.9500808   | 0.01745533 | 0.22281422 | Up   |
| Cend1   | 6.37998896 | 0.71114868 | 2.56048315  | 3.53297665 | 1.82088421  | 0.01045267 | 0.1749353  | Up   |
| Cfap61  | 24.9544919 | 0.47331138 | -2.69130182 | 0.41356219 | -1.27382379 | 0.00711738 | 0.1494308  | Down |
| Chadl   | 399.64966  | 0.37683106 | 2.96650353  | 2.17026419 | 1.11787068  | 0.00301207 | 0.11179679 | Up   |
| Chd5    | 699.439099 | 0.81934868 | 3.03183132  | 5.59495685 | 2.48412701  | 0.00243075 | 0.10258232 | Up   |
| Chi3l1  | 939.837177 | 0.51485045 | -2.23125098 | 0.45101253 | -1.14876057 | 0.02566451 | 0.25860371 | Down |
| Chl1    | 2355.93872 | 0.7958712  | 2.53785393  | 4.0552893  | 2.01980484  | 0.01115345 | 0.18175249 | Up   |
| Chodl   | 32.7119435 | 0.74364086 | 2.91025497  | 4.48213    | 2.1641845   | 0.00361134 | 0.11765336 | Up   |
| Chrm1   | 91.956994  | 1.15631063 | 2.56686705  | 7.82502669 | 2.96809567  | 0.01026219 | 0.1737349  | Up   |
| Chrm2   | 213.035279 | 1.47116118 | 2.37375402  | 11.2525086 | 3.49217476  | 0.01760828 | 0.22369006 | Up   |
| Chrna3  | 697.7275   | 1.53017517 | 2.07279885  | 9.01136295 | 3.17174533  | 0.038191   | 0.31433721 | Up   |
| Chrna4  | 15.6941945 | 0.37365893 | 3.74875926  | 2.6404016  | 1.40075737  | 0.00017771 | 0.0328411  | Up   |
| Chrna5  | 75.5139031 | 1.66087287 | 2.20786935  | 12.7020575 | 3.6669903   | 0.02725338 | 0.26569308 | Up   |
| Chrna7  | 573.914252 | 1.58535443 | 2.30122444  | 12.5381828 | 3.64825636  | 0.02137895 | 0.24103124 | Up   |
| Chrb2   | 130.024833 | 0.8389067  | 2.21899767  | 3.63393346 | 1.861532    | 0.02648688 | 0.26158728 | Up   |
| Chst4   | 11.6138636 | 1.82415948 | -2.66578502 | 0.03436736 | -4.862817   | 0.00768088 | 0.15537465 | Down |
| Chst5   | 3.55926247 | 0.73472134 | 2.18034804  | 3.03552958 | 1.60194823  | 0.02923167 | 0.27546497 | Up   |
| Chst8   | 13.8193901 | 1.24105506 | 1.96165956  | 5.40587262 | 2.43452752  | 0.04980213 | 0.35029097 | Up   |
| Ciapin1 | 2228.73721 | 0.54654948 | -2.09979305 | 0.45136273 | -1.14764081 | 0.03574705 | 0.30500663 | Down |
| Cib2    | 1403.36507 | 0.68842236 | -2.71596299 | 0.2736247  | -1.86972965 | 0.00660833 | 0.1458793  | Down |
| Ckm     | 137.497803 | 0.9187816  | 2.3465926   | 4.45679348 | 2.15600611  | 0.01894596 | 0.2302349  | Up   |
| Ckmt1b  | 105.080248 | 1.19856244 | 3.07495261  | 12.8662767 | 3.68552271  | 0.00210536 | 0.09856453 | Up   |
| Clenkb  | 182.646651 | 0.28474324 | -4.57782478 | 0.40514082 | -1.30350465 | 4.70E-06   | 0.00343685 | Down |
| Cldn1   | 650.8703   | 0.42103589 | 4.11908281  | 3.32713801 | 1.73428171  | 3.80E-05   | 0.01260002 | Up   |
| Clec18a | 3.07509363 | 1.5033205  | 2.23941737  | 10.3142144 | 3.36656204  | 0.02512877 | 0.25723657 | Up   |
| Clec1b  | 934.341047 | 1.07508243 | -2.44713043 | 0.16144706 | -2.63086693 | 0.01439987 | 0.20345185 | Down |
| Clec4d  | 73.6463745 | 0.60910173 | -2.2083059  | 0.39363135 | -1.34508295 | 0.02722296 | 0.26569308 | Down |
| Clgn    | 113.360603 | 0.73016006 | 2.98614622  | 4.53268125 | 2.18036471  | 0.00282518 | 0.10782343 | Up   |
| Clip3   | 38.7953528 | 0.79566856 | 1.99190225  | 2.99985754 | 1.58489399  | 0.04638178 | 0.33980433 | Up   |
| Clip4   | 20.725354  | 0.90170266 | 2.89890567  | 6.12177893 | 2.61395095  | 0.00374468 | 0.1187952  | Up   |
| Clstn2  | 874.513028 | 0.71312508 | 2.89530871  | 4.18351974 | 2.06471724  | 0.00378786 | 0.11921035 | Up   |

|          |            |            |             |            |             |            |            |      |
|----------|------------|------------|-------------|------------|-------------|------------|------------|------|
| Clvs1    | 12.5948146 | 0.79391168 | 2.88861772  | 4.9017855  | 2.29330736  | 0.00386939 | 0.11958141 | Up   |
| Clvs2    | 32.9175848 | 1.12858321 | 3.55285204  | 16.1078177 | 4.00968915  | 0.00038108 | 0.04667955 | Up   |
| Cmtm5    | 360.113301 | 0.65978411 | 3.25631342  | 4.43355467 | 2.14846387  | 0.00112869 | 0.07513311 | Up   |
| Cnksr2   | 339.78915  | 0.55484524 | 3.14572947  | 3.35286182 | 1.74539303  | 0.00165673 | 0.08878887 | Up   |
| Cnm1     | 192.451445 | 0.77606707 | 2.49711019  | 3.83154162 | 1.93792498  | 0.012521   | 0.19231737 | Up   |
| Cnr2     | 132.298003 | 0.40824301 | -2.59713733 | 0.47954458 | -1.06026316 | 0.00940043 | 0.16771749 | Down |
| Cntn1    | 394.007218 | 0.70849093 | 2.72044239  | 3.80371399 | 1.92740877  | 0.00651946 | 0.1454329  | Up   |
| Cntn3    | 6.74140113 | 1.25515034 | 2.52054908  | 8.96105158 | 3.16366804  | 0.01171719 | 0.18598964 | Up   |
| Cntn5    | 133.49549  | 1.17559499 | 4.41169074  | 36.4124904 | 5.18636151  | 1.03E-05   | 0.00616542 | Up   |
| Cntnap2  | 259.96977  | 0.96183875 | 2.0872071   | 4.0210065  | 2.00755667  | 0.03686942 | 0.31019318 | Up   |
| Cntnap5c | 70.3886758 | 1.28828831 | 2.84621472  | 12.6998993 | 3.66674515  | 0.00442424 | 0.1260907  | Up   |
| Col28a1  | 1769.4792  | 0.69464805 | 2.82418925  | 3.89552438 | 1.96181754  | 0.00474004 | 0.12835359 | Up   |
| Col6a4   | 14.2583955 | 0.65275336 | -2.8974369  | 0.26956187 | -1.89131168 | 0.00376225 | 0.1187952  | Down |
| Col7a1   | 281.587345 | 0.48390629 | -2.27078636 | 0.46688922 | -1.09884781 | 0.02315991 | 0.25036666 | Down |
| Col9a3   | 146.689787 | 0.71926381 | 2.72787409  | 3.89618212 | 1.96206111  | 0.00637439 | 0.14347289 | Up   |
| Colec11  | 5.32777104 | 1.33725581 | 2.55098057  | 10.6391693 | 3.4113136   | 0.01074203 | 0.17794937 | Up   |
| Colq     | 291.569641 | 0.5244945  | -2.63740824 | 0.38333932 | -1.38330611 | 0.00835422 | 0.16095744 | Down |
| Corin    | 701.924078 | 0.52330074 | -2.61897939 | 0.38675348 | -1.37051384 | 0.00881933 | 0.16402818 | Down |
| Coro6    | 1103.74976 | 0.45116818 | -2.45609421 | 0.46390087 | -1.10811156 | 0.01404563 | 0.20109326 | Down |
| Cox10    | 1389.81741 | 0.50704834 | -1.98107185 | 0.49844313 | -1.00449919 | 0.04758322 | 0.34349135 | Down |
| Cpa1     | 33.243011  | 0.9255589  | 2.30390878  | 4.38447249 | 2.13240328  | 0.02122776 | 0.24103086 | Up   |
| Cplx1    | 495.855977 | 0.93052677 | 2.90910793  | 6.52963699 | 2.70700279  | 0.00362462 | 0.11765336 | Up   |
| Cplx2    | 1311.94543 | 0.32745963 | 3.18588405  | 2.06086271 | 1.0432484   | 0.00144312 | 0.08417106 | Up   |
| Cpne6    | 79.6708385 | 0.93273374 | 2.38408641  | 4.67095591 | 2.22371783  | 0.01712158 | 0.22134498 | Up   |
| Cpne9    | 31.1346187 | 0.75586671 | 2.23736183  | 3.22913403 | 1.69114732  | 0.0252627  | 0.25762099 | Up   |
| Cpt1b    | 11122.9044 | 0.9877949  | -2.14101407 | 0.23086433 | -2.11488278 | 0.0322729  | 0.29085374 | Down |
| Cpt2     | 5604.6049  | 0.68834572 | -1.9923399  | 0.38651099 | -1.37141864 | 0.04633378 | 0.33978103 | Down |
| Crb2     | 236.084045 | 0.77130371 | -3.506109   | 0.15343772 | -2.70427489 | 0.00045471 | 0.04989294 | Down |
| Crmp1    | 214.621826 | 1.35712538 | 2.2880479   | 8.60495632 | 3.10516787  | 0.02213473 | 0.24501724 | Up   |
| Crocc    | 1018.59682 | 0.457248   | -2.31443799 | 0.48020684 | -1.05827214 | 0.02064371 | 0.23734182 | Down |
| Crtac1   | 20.7403796 | 0.76087807 | 2.72857845  | 4.21670328 | 2.07611551  | 0.0063608  | 0.14347289 | Up   |
| Crtap    | 48.9979116 | 0.59586799 | -2.6063684  | 0.34078849 | -1.5530515  | 0.0091508  | 0.16561185 | Down |

|         |            |            |             |            |             |            |            |      |
|---------|------------|------------|-------------|------------|-------------|------------|------------|------|
| Csmd1   | 923.70478  | 0.63601416 | 2.6293254   | 3.18719695 | 1.67228817  | 0.00855545 | 0.16220237 | Up   |
| Csmd3   | 59.1440337 | 1.07441546 | 2.57628699  | 6.81164178 | 2.76800257  | 0.00998677 | 0.17196851 | Up   |
| Csrnp1  | 4046.11102 | 0.40559795 | -2.88146915 | 0.44481644 | -1.16871799 | 0.00395826 | 0.12001936 | Down |
| Ctnna2  | 150.943013 | 0.94284876 | 3.02043666  | 7.19909204 | 2.84781496  | 0.0025241  | 0.10329414 | Up   |
| Ctrc    | 68.7613811 | 0.58821351 | -2.30831227 | 0.39018211 | -1.35778047 | 0.02098177 | 0.2396591  | Down |
| Ctxn1   | 188.889014 | 0.58848508 | 2.80597519  | 3.14111018 | 1.65127455  | 0.00501646 | 0.13086017 | Up   |
| Ctxn3   | 56.2920268 | 0.88296851 | 2.4281872   | 4.41989729 | 2.14401284  | 0.01517451 | 0.20812787 | Up   |
| Cux2    | 49.4921189 | 0.47676323 | 3.09029477  | 2.77663764 | 1.47333891  | 0.00199958 | 0.09616605 | Up   |
| Cxcl14  | 1350.44378 | 1.1545822  | -2.41656007 | 0.14457427 | -2.79011723 | 0.01566794 | 0.21178673 | Down |
| Cxcr1   | 3.9607199  | 0.64886589 | -2.16659202 | 0.37740157 | -1.40582766 | 0.03026598 | 0.28048387 | Down |
| Cyb561  | 2558.0736  | 0.58979262 | 2.5223112   | 2.80429966 | 1.48764052  | 0.01165865 | 0.18590308 | Up   |
| Cyp11b2 | 12.6694241 | 2.02295394 | 2.01054071  | 16.7632648 | 4.06723125  | 0.04437399 | 0.33535353 | Up   |
| Cyp2s1  | 190.280521 | 0.58076228 | 3.28132181  | 3.74682327 | 1.90566793  | 0.00103322 | 0.07373647 | Up   |
| Cyp4a2  | 3.01390294 | 1.42096466 | -3.26411061 | 0.04015753 | -4.63818582 | 0.00109808 | 0.07513311 | Down |
| Cyp4x1  | 21.8965116 | 1.18781864 | 2.04045587  | 5.36542152 | 2.42369152  | 0.04130494 | 0.32561723 | Up   |
| Dbh     | 4353.12238 | 1.36017972 | 2.30510728  | 8.78693598 | 3.13536018  | 0.02116057 | 0.24076144 | Up   |
| Dbndd1  | 71.6043614 | 0.50732662 | 2.00057005  | 2.02082226 | 1.01494244  | 0.04543874 | 0.33810988 | Up   |
| Dcaf12  | 116.999553 | 0.46283359 | 2.37679734  | 2.14363851 | 1.10006164  | 0.01746368 | 0.22281422 | Up   |
| Dct     | 15.4213336 | 1.23206247 | -2.27536493 | 0.14325012 | -2.80339173 | 0.02288405 | 0.24891719 | Down |
| Dex     | 84.5255026 | 0.64803977 | 2.19348935  | 2.6785799  | 1.42146833  | 0.02827214 | 0.27070894 | Up   |
| Ddc     | 410.588324 | 1.19879455 | 2.48380049  | 7.87656446 | 2.9775665   | 0.01299886 | 0.1952997  | Up   |
| Ddx25   | 33.6528276 | 0.60746067 | 2.87879855  | 3.36068865 | 1.74875689  | 0.00399193 | 0.12083166 | Up   |
| Dgkk    | 9.94265172 | 1.80309212 | 2.53356225  | 23.7235193 | 4.56824614  | 0.01129097 | 0.18303254 | Up   |
| Dhrs9   | 444.931963 | 0.84828678 | -2.46207799 | 0.23511717 | -2.08854821 | 0.01381346 | 0.1999251  | Down |
| Dio1    | 1.47826534 | 1.25160597 | 2.17443899  | 6.59576873 | 2.72154081  | 0.02967218 | 0.27823225 | Up   |
| Dio2    | 2242.25504 | 0.73974941 | -2.64569098 | 0.257537   | -1.95714835 | 0.00815243 | 0.15867403 | Down |
| Dio3    | 29.8332057 | 0.54991021 | 3.27453469  | 3.48389236 | 1.80070005  | 0.00105836 | 0.07492175 | Up   |
| Diras1  | 20.4977612 | 1.14876617 | 2.90658577  | 10.1189479 | 3.33898739  | 0.00365397 | 0.11765336 | Up   |
| Diras2  | 157.588403 | 0.6067674  | 2.80400789  | 3.25212018 | 1.70138057  | 0.00504717 | 0.1309732  | Up   |
| Disp2   | 1137.67697 | 1.04797941 | 2.51637009  | 6.22081689 | 2.63710404  | 0.01185706 | 0.18719654 | Up   |
| Disp3   | 13.8615723 | 1.26550156 | 3.393135    | 19.6167975 | 4.29401763  | 0.00069098 | 0.06126652 | Up   |
| Dlgap1  | 191.158345 | 0.56645087 | 2.08755818  | 2.2696961  | 1.18249914  | 0.03683771 | 0.3101788  | Up   |

|         |            |            |             |            |             |            |            |      |
|---------|------------|------------|-------------|------------|-------------|------------|------------|------|
| Dlgap2  | 10.5928373 | 1.35229847 | 3.04870623  | 17.4210633 | 4.12276078  | 0.00229829 | 0.1020795  | Up   |
| Dlgap3  | 46.6064391 | 0.96243224 | 2.35447039  | 4.80993769 | 2.2660182   | 0.01854912 | 0.22819978 | Up   |
| Dlk1    | 35.8531738 | 0.98571897 | 2.51563343  | 5.57784409 | 2.47970761  | 0.01188187 | 0.18725143 | Up   |
| Dlx1    | 30.833299  | 0.712095   | 2.43410804  | 3.32491203 | 1.73331617  | 0.01492854 | 0.20651932 | Up   |
| Dmrt2   | 138.056417 | 0.75266914 | 2.58327012  | 3.8486373  | 1.94434772  | 0.00978687 | 0.17011705 | Up   |
| Dnah11  | 50.7254015 | 0.43359881 | 2.77552789  | 2.30292208 | 1.2034656   | 0.00551122 | 0.13570116 | Up   |
| Dnah2   | 48.5094053 | 0.56689285 | 3.90748033  | 4.64321042 | 2.21512266  | 9.33E-05   | 0.02212617 | Up   |
| Dnah5   | 21.8586547 | 0.40485494 | -2.58786522 | 0.48373539 | -1.04771002 | 0.00965728 | 0.16912288 | Down |
| Dnajc6  | 526.734725 | 0.81731705 | 2.81795357  | 4.93538118 | 2.30316151  | 0.00483308 | 0.12898123 | Up   |
| Dner    | 255.997304 | 1.03418121 | 2.65884697  | 6.72591047 | 2.74972958  | 0.00784086 | 0.15604809 | Up   |
| Dock3   | 232.815202 | 0.56993945 | 2.37248426  | 2.55296254 | 1.35217237  | 0.01766892 | 0.22369006 | Up   |
| Dpp10   | 1.94209687 | 1.82686284 | 2.04578773  | 13.3371046 | 3.73737359  | 0.04077726 | 0.32276175 | Up   |
| Dpp6    | 443.481984 | 1.19329046 | 2.2187868   | 6.266488   | 2.64765712  | 0.02650123 | 0.26158728 | Up   |
| Dpysl5  | 67.893451  | 1.30522035 | 2.1960034   | 7.29176639 | 2.86626834  | 0.0280917  | 0.26949611 | Up   |
| Drd1    | 52.5152472 | 0.35101555 | -3.02183444 | 0.47939578 | -1.06071087 | 0.00251248 | 0.10329414 | Down |
| Drd2    | 111.686698 | 1.66972161 | 3.30807705  | 46.0001846 | 5.52356774  | 0.00093939 | 0.07027322 | Up   |
| Drgx    | 3.82655649 | 1.50240457 | 2.49417755  | 13.4288489 | 3.74726374  | 0.01262494 | 0.19290113 | Up   |
| Drp2    | 474.519462 | 0.69312811 | 2.09249251  | 2.73277253 | 1.45036538  | 0.03639448 | 0.30790341 | Up   |
| Dsg2    | 16.0952631 | 1.15763078 | -2.34149922 | 0.15276738 | -2.71059157 | 0.01920647 | 0.23126798 | Down |
| Dusp15  | 125.66282  | 0.56163204 | 2.63264191  | 2.78673544 | 1.47857605  | 0.00847236 | 0.16206717 | Up   |
| Dusp2   | 47.5613645 | 0.4893951  | -2.91269564 | 0.3723009  | -1.42545898 | 0.00358324 | 0.11765336 | Down |
| Dusp26  | 133.872935 | 0.66698986 | 2.34283421  | 2.95395255 | 1.56264665  | 0.01913788 | 0.23091732 | Up   |
| Dusp4   | 412.369686 | 0.48649926 | -2.77001165 | 0.39294284 | -1.34760861 | 0.00560543 | 0.1359239  | Down |
| Dusp5   | 164.826491 | 0.22638919 | -4.91714431 | 0.46227129 | -1.11318833 | 8.78E-07   | 0.00125896 | Down |
| Dusp9   | 4.16238713 | 1.28614772 | 2.96687657  | 14.0825975 | 3.81584155  | 0.00300842 | 0.11179679 | Up   |
| Dync1i1 | 297.676026 | 0.72217333 | 3.14535592  | 4.8282225  | 2.27149216  | 0.00165885 | 0.08878887 | Up   |
| Dyrk3   | 15.0384902 | 0.92742703 | 2.03513293  | 3.69977436 | 1.88743729  | 0.0418375  | 0.32779699 | Up   |
| Eaf2    | 5.95537553 | 1.04381534 | -2.05237403 | 0.22651846 | -2.1422995  | 0.04013333 | 0.32080195 | Down |
| Eef1a2  | 923.17002  | 0.5920719  | 2.55467153  | 2.85313739 | 1.51254922  | 0.0106288  | 0.1765367  | Up   |
| Efcab13 | 6.44712368 | 0.57716314 | -3.21403377 | 0.27642848 | -1.85502182 | 0.00130884 | 0.08005501 | Down |
| Efr3b   | 864.347538 | 0.35404905 | 2.86596511  | 2.02047181 | 1.01469222  | 0.0041574  | 0.12299483 | Up   |
| Egfl8   | 548.743774 | 0.36575138 | 2.7848844   | 2.02591733 | 1.01857531  | 0.00535468 | 0.13448752 | Up   |

|          |            |            |             |            |             |            |            |      |
|----------|------------|------------|-------------|------------|-------------|------------|------------|------|
| Egr3     | 1379.4965  | 0.43397489 | -3.24494463 | 0.3767751  | -1.40822447 | 0.00117473 | 0.0755064  | Down |
| Elavl2   | 495.417492 | 1.4418242  | 2.06204456  | 7.85224811 | 2.97310576  | 0.03920349 | 0.31677516 | Up   |
| Elavl3   | 86.1685403 | 1.24464979 | 2.45638097  | 8.32432948 | 3.05733407  | 0.01403443 | 0.20109326 | Up   |
| Elavl4   | 128.479668 | 1.4693839  | 2.06197313  | 8.16713518 | 3.02983011  | 0.03921029 | 0.31677516 | Up   |
| Elfn2    | 21.6533961 | 0.73368485 | 2.55582349  | 3.66844584 | 1.87516899  | 0.01059368 | 0.17612    | Up   |
| Elmod1   | 57.5194488 | 1.31890468 | 2.54827174  | 10.2740103 | 3.36092752  | 0.01082581 | 0.17878109 | Up   |
| Elovl2   | 163.513507 | 1.15889108 | 2.35265947  | 6.6183706  | 2.72647608  | 0.0186397  | 0.22819978 | Up   |
| Elovl4   | 134.732764 | 0.50580169 | 3.12103778  | 2.98685291 | 1.57862619  | 0.00180215 | 0.09224061 | Up   |
| Emb      | 141.470672 | 0.44092608 | 2.34694812  | 2.04887312 | 1.03483064  | 0.01892789 | 0.2302349  | Up   |
| Enho     | 83.4777515 | 0.48837665 | 2.32560758  | 2.1973618  | 1.13577243  | 0.02003949 | 0.23391846 | Up   |
| Entpd2   | 2743.56676 | 0.37086286 | 3.77636195  | 2.63995329 | 1.4005124   | 0.00015914 | 0.03139086 | Up   |
| Entpd3   | 148.102029 | 0.67138922 | 2.89253547  | 3.84242506 | 1.94201712  | 0.00382146 | 0.11947506 | Up   |
| Epb4113  | 1373.86612 | 0.75337244 | 2.85785363  | 4.44760348 | 2.15302817  | 0.00426517 | 0.12463794 | Up   |
| Epb4114b | 881.301367 | 0.29108457 | 3.55180885  | 2.04751886 | 1.03387674  | 0.00038259 | 0.04667955 | Up   |
| Epcam    | 5.29172911 | 0.78696666 | 2.14897383  | 3.2291865  | 1.69117076  | 0.03163647 | 0.28718198 | Up   |
| Epha10   | 23.3576614 | 1.32813677 | 2.20563636  | 7.6178652  | 2.92938676  | 0.02740947 | 0.26644556 | Up   |
| Epha5    | 172.445652 | 1.45628087 | 2.76081204  | 16.2291751 | 4.02051777  | 0.00576578 | 0.1377285  | Up   |
| Ephx2    | 2653.55449 | 0.57712799 | -2.00743458 | 0.44796357 | -1.15854669 | 0.04470341 | 0.33535353 | Down |
| Epor     | 61.58396   | 0.42731314 | -2.43730264 | 0.48582497 | -1.04149145 | 0.01479729 | 0.20536971 | Down |
| Erbb3    | 3262.63891 | 0.56751556 | 3.06411452  | 3.33788135 | 1.73893267  | 0.00218315 | 0.10001669 | Up   |
| Erc2     | 61.8125305 | 1.1175964  | 2.34523227  | 6.151862   | 2.62102314  | 0.01901523 | 0.23038742 | Up   |
| Erich3   | 42.5410918 | 1.18833569 | 2.47002693  | 7.64873493 | 2.93522115  | 0.01351029 | 0.19796113 | Up   |
| Erich5   | 10.4995727 | 0.39393574 | 2.69986788  | 2.0901036  | 1.06357445  | 0.0069367  | 0.14818674 | Up   |
| Ermap    | 17.2223609 | 1.08524506 | -2.28978923 | 0.17862644 | -2.48498246 | 0.02203354 | 0.24477297 | Down |
| Esrrb    | 93.1246339 | 0.96702824 | -2.22966487 | 0.22435436 | -2.15614889 | 0.0257697  | 0.2586687  | Down |
| Esrrg    | 1038.33768 | 0.55177161 | -2.72316207 | 0.35292572 | -1.50256352 | 0.00646603 | 0.1446085  | Down |
| Etfhdh   | 9208.92757 | 0.69296981 | -2.00961038 | 0.38087795 | -1.39259932 | 0.04447244 | 0.33535353 | Down |
| Evi2a    | 568.580123 | 0.66388766 | -2.4207904  | 0.32825005 | -1.60713286 | 0.0154868  | 0.21093817 | Down |
| Evi2b    | 268.427098 | 0.54717182 | -1.96510889 | 0.47458809 | -1.0752522  | 0.04940164 | 0.34887938 | Down |
| Eya1     | 25.6276474 | 1.12460534 | 2.15219919  | 5.35310041 | 2.42037471  | 0.03138167 | 0.28547909 | Up   |
| F2rl2    | 880.140569 | 0.93117088 | -2.53764099 | 0.19438955 | -2.3629774  | 0.01116024 | 0.18175249 | Down |
| F2rl3    | 125.901104 | 0.72997875 | -2.46616047 | 0.28712588 | -1.80024473 | 0.01365701 | 0.19880807 | Down |

|         |            |            |             |            |             |            |            |      |
|---------|------------|------------|-------------|------------|-------------|------------|------------|------|
| F5      | 2322.66036 | 0.72972944 | -2.65822508 | 0.26065526 | -1.93978511 | 0.00785534 | 0.15604809 | Down |
| Fabp3   | 2148.57491 | 1.0601291  | -2.57349387 | 0.15091041 | -2.72823573 | 0.01006774 | 0.17266943 | Down |
| Faim2   | 207.260102 | 1.34100389 | 2.43355511  | 9.60247882 | 3.26340688  | 0.01495136 | 0.20651932 | Up   |
| Fam131b | 256.18763  | 0.42128249 | 2.53047023  | 2.09368266 | 1.06604279  | 0.01139098 | 0.18329969 | Up   |
| Fam131c | 9.77671744 | 1.42618967 | 2.96346558  | 18.7194223 | 4.22646401  | 0.00304196 | 0.1121752  | Up   |
| Fam135b | 5.62987794 | 1.92034053 | 2.23426053  | 19.5695821 | 4.29054104  | 0.02546594 | 0.25812931 | Up   |
| Fam151a | 3187.47944 | 0.62371954 | -2.75483865 | 0.30391785 | -1.71824669 | 0.00587211 | 0.13824882 | Down |
| Fam155a | 50.6162276 | 1.38007581 | 3.08951605  | 19.2097438 | 4.26376637  | 0.00200483 | 0.09616605 | Up   |
| Fam155b | 17.3355576 | 0.68248811 | 2.01603546  | 2.59533402 | 1.37592023  | 0.04379627 | 0.33490515 | Up   |
| Fam163a | 297.912679 | 0.75741007 | 2.70935874  | 4.1470792  | 2.0520956   | 0.00674134 | 0.14589419 | Up   |
| Fam163b | 13.5268221 | 1.09751557 | 2.83498265  | 8.64243351 | 3.1114376   | 0.00458282 | 0.12791088 | Up   |
| Fam169a | 102.176111 | 0.55795515 | 2.97874282  | 3.16455998 | 1.66200491  | 0.00289434 | 0.10932975 | Up   |
| Fam181b | 133.060976 | 0.48911298 | 2.91302795  | 2.68477238 | 1.42479978  | 0.00357943 | 0.11765336 | Up   |
| Fam19a4 | 5.02945362 | 1.60565504 | 2.58870078  | 17.8340252 | 4.15656045  | 0.00963388 | 0.16912288 | Up   |
| Fam222a | 58.6187526 | 0.55057303 | 2.63157633  | 2.72995082 | 1.44887496  | 0.00849898 | 0.16215938 | Up   |
| Fam71f2 | 18.2489783 | 1.27275721 | -3.12901291 | 0.0632639  | -3.98247373 | 0.00175395 | 0.09049707 | Down |
| Fam78b  | 440.92626  | 0.48335924 | 2.3242857   | 2.17869611 | 1.12346498  | 0.02011019 | 0.23414087 | Up   |
| Fam84a  | 37.1302857 | 0.50944837 | 2.91808899  | 2.80230832 | 1.48661569  | 0.00352184 | 0.11765336 | Up   |
| Fbll1   | 29.510068  | 1.49603762 | 2.60341182  | 14.8748377 | 3.89480202  | 0.0092301  | 0.16603879 | Up   |
| Fbn2    | 56.0520183 | 0.7771555  | 2.60339022  | 4.06495397 | 2.02323901  | 0.00923068 | 0.16603879 | Up   |
| Fbxl16  | 367.24385  | 0.45580679 | 2.25907594  | 2.04160273 | 1.02970216  | 0.02387866 | 0.25269064 | Up   |
| Fbxo16  | 12.517092  | 1.15554532 | 2.10604421  | 5.40250884 | 2.43362953  | 0.03520051 | 0.30360354 | Up   |
| Fbxo2   | 60.4493625 | 0.62095818 | 2.95240861  | 3.56356759 | 1.83332229  | 0.00315305 | 0.11220917 | Up   |
| Fbxo41  | 84.3224921 | 0.52701671 | 2.77276666  | 2.75355297 | 1.46129436  | 0.0055582  | 0.13571584 | Up   |
| Fcar    | 7.36892886 | 1.08595577 | -1.96430432 | 0.22795996 | -2.13314762 | 0.04949481 | 0.34938918 | Down |
| Fcgr3a  | 66.1412286 | 0.40410281 | -3.63389654 | 0.36136588 | -1.4684678  | 0.00027917 | 0.03982596 | Down |
| Fermt3  | 531.199468 | 0.47127059 | -2.44698853 | 0.44962877 | -1.15319374 | 0.01440554 | 0.20345185 | Down |
| Fez1    | 386.832003 | 0.52783391 | 2.92193539  | 2.91257778 | 1.54229658  | 0.00347864 | 0.11765336 | Up   |
| Ffar3   | 14.7779676 | 1.41054527 | 2.00513457  | 7.10253038 | 2.8283331   | 0.04494866 | 0.33593815 | Up   |
| Fgf5    | 6.80527748 | 0.82135661 | 3.29991848  | 6.54507555 | 2.71040984  | 0.00096713 | 0.07134    | Up   |
| Fkbp1b  | 189.60687  | 0.80025905 | 2.96451025  | 5.17793249 | 2.37237616  | 0.00303165 | 0.11204984 | Up   |
| Fmn2    | 112.210314 | 0.56259421 | 2.11631545  | 2.2825189  | 1.19062681  | 0.03431799 | 0.30041322 | Up   |

|         |            |            |             |            |             |            |            |      |
|---------|------------|------------|-------------|------------|-------------|------------|------------|------|
| Fndc5   | 1053.95648 | 0.74466489 | -2.98320343 | 0.21442026 | -2.22148685 | 0.00285248 | 0.10839437 | Down |
| Folh1   | 130.927001 | 0.46334821 | 4.26031218  | 3.92858027 | 1.97400804  | 2.04E-05   | 0.00815122 | Up   |
| Foxd3   | 231.528367 | 0.66696219 | 2.61140827  | 3.34431463 | 1.74171058  | 0.00901702 | 0.16516558 | Up   |
| Foxf2   | 1.02324968 | 1.70188964 | 1.96908292  | 10.2046997 | 3.35116182  | 0.04894357 | 0.34787584 | Up   |
| Fpr2    | 13.8946555 | 0.69052122 | -2.88307165 | 0.25159547 | -1.99082215 | 0.00393818 | 0.1198054  | Down |
| Fras1   | 529.611555 | 0.45624913 | 2.34650303  | 2.10029207 | 1.07058996  | 0.01895051 | 0.2302349  | Up   |
| Frmf5   | 209.705796 | 0.4888248  | 2.77588602  | 2.56138111 | 1.35692193  | 0.00550515 | 0.13570116 | Up   |
| Frmf1   | 149.280013 | 0.79093691 | 3.69794187  | 7.593888   | 2.92483872  | 0.00021735 | 0.03668152 | Up   |
| Frmf3   | 79.6483356 | 0.42463764 | 2.37106638  | 2.00951037 | 1.00684402  | 0.01773685 | 0.22402018 | Up   |
| Frmf4   | 262.507783 | 1.29217286 | 2.30034968  | 7.84867665 | 2.97244943  | 0.02142842 | 0.24110295 | Up   |
| Fsd1    | 19.7889118 | 0.92122104 | 1.96977336  | 3.51761275 | 1.81459666  | 0.04886435 | 0.34745344 | Up   |
| Fxyd6   | 1731.84418 | 0.7276468  | 3.03578158  | 4.6234723  | 2.20897674  | 0.00239913 | 0.10258232 | Up   |
| Fyb     | 924.983489 | 0.62771567 | -2.78187195 | 0.29808081 | -1.7462246  | 0.00540464 | 0.13458694 | Down |
| Fzd7    | 8.72272583 | 0.76367039 | 3.0182743   | 4.94156055 | 2.30496672  | 0.00254219 | 0.10361769 | Up   |
| G0s2    | 1712.35907 | 0.68928196 | -2.00000081 | 0.3846013  | -1.37856447 | 0.04550018 | 0.33814899 | Down |
| G6b     | 217.62613  | 0.95008041 | -2.23629925 | 0.22930439 | -2.12466411 | 0.02533218 | 0.25794959 | Down |
| Gabbr2  | 88.3760662 | 0.71965561 | 2.80116111  | 4.04424757 | 2.01587131  | 0.00509191 | 0.13117495 | Up   |
| Gabra2  | 20.4320838 | 0.63931532 | 2.52536359  | 3.06206228 | 1.61450363  | 0.01155786 | 0.18500379 | Up   |
| Gabrb2  | 18.3285347 | 1.07774459 | 2.62567358  | 7.10978283 | 2.82980549  | 0.00864777 | 0.16278867 | Up   |
| Gabrb3  | 112.448334 | 1.24744734 | 2.53710233  | 8.96871657 | 3.16490155  | 0.01117743 | 0.18186369 | Up   |
| Gabrg1  | 21.6780332 | 0.70042045 | -2.01307584 | 0.37631182 | -1.40999948 | 0.04410665 | 0.3350655  | Down |
| Gabrg2  | 43.3885636 | 1.41920542 | 2.23539195  | 9.01595544 | 3.17248038  | 0.02539163 | 0.25797189 | Up   |
| Gal3st1 | 133.878928 | 0.37977846 | 3.17985984  | 2.30959882 | 1.20764228  | 0.00147346 | 0.08453633 | Up   |
| Galnt6  | 105.843397 | 0.8864687  | 2.10771099  | 3.65132436 | 1.86841984  | 0.035056   | 0.3030883  | Up   |
| Galnt9  | 21.8601358 | 0.83576797 | 2.61895629  | 4.55938674 | 2.18883979  | 0.00881992 | 0.16402818 | Up   |
| Galnt16 | 4.58232453 | 1.47149018 | 1.97860349  | 7.52397789 | 2.91149561  | 0.04786067 | 0.34436141 | Up   |
| Gap43   | 336.321629 | 0.94099924 | 3.1537724   | 7.82286691 | 2.96769742  | 0.00161175 | 0.08814902 | Up   |
| Garnl3  | 561.267809 | 0.42409804 | 2.60815701  | 2.15265075 | 1.10611427  | 0.00910312 | 0.1654102  | Up   |
| Gas2l3  | 687.137297 | 0.54729473 | 2.77180341  | 2.86193995 | 1.5169934   | 0.00557467 | 0.1359239  | Up   |
| Gata4   | 4.15538045 | 1.48564589 | -2.483548   | 0.0774993  | -3.68967288 | 0.01300808 | 0.1952997  | Down |
| Gbx2    | 14.3876526 | 1.06761273 | -1.97713835 | 0.2315157  | -2.11081807 | 0.04802599 | 0.34465596 | Down |
| Gcs1    | 54.2896434 | 0.53429659 | 2.15211096  | 2.21893213 | 1.14986554  | 0.03138862 | 0.28547909 | Up   |



|         |            |            |             |            |             |            |            |      |
|---------|------------|------------|-------------|------------|-------------|------------|------------|------|
| Gdap1   | 209.639995 | 0.63938607 | 3.18337376  | 4.09937745 | 2.03540483  | 0.0014557  | 0.08434388 | Up   |
| Gdap111 | 46.1064628 | 1.01841126 | 2.62205974  | 6.36577061 | 2.67033517  | 0.00874001 | 0.16328333 | Up   |
| Gfra2   | 973.132751 | 0.39236016 | 3.02502566  | 2.27662952 | 1.18689954  | 0.00248612 | 0.10289734 | Up   |
| Gipc3   | 359.027106 | 0.39509996 | -2.91741886 | 0.44979138 | -1.15267208 | 0.00352941 | 0.11765336 | Down |
| Gja1    | 10581.5287 | 0.29425551 | -3.59455644 | 0.48039131 | -1.05771803 | 0.00032494 | 0.04354755 | Down |
| Gja6    | 60.1517837 | 0.48959763 | -2.07012135 | 0.49533398 | -1.01352651 | 0.03844098 | 0.31463868 | Down |
| Gjd2    | 16.205746  | 1.34432605 | 2.42829503  | 9.60922617 | 3.26442026  | 0.01517    | 0.20812787 | Up   |
| Gk      | 4105.58189 | 0.81842034 | -2.7164897  | 0.21416128 | -2.22323043 | 0.00659782 | 0.1458793  | Down |
| Glrp    | 84.394059  | 0.80955847 | 3.42802739  | 6.84565512 | 2.77518861  | 0.00060798 | 0.05707898 | Up   |
| Glyctk  | 1242.4536  | 0.75179739 | -2.30568281 | 0.30074105 | -1.73340631 | 0.02112836 | 0.24055093 | Down |
| Gmpr    | 3795.95688 | 0.68936783 | -3.32044398 | 0.20461627 | -2.28900725 | 0.00089874 | 0.0690267  | Down |
| Gnal    | 77.5661561 | 0.72610588 | 2.30170917  | 3.18498054 | 1.67128456  | 0.02135158 | 0.24103124 | Up   |
| Gnas    | 38334.4327 | 0.58506756 | -2.22251797 | 0.40603524 | -1.30032316 | 0.02624832 | 0.26123329 | Down |
| Gnat3   | 10.1964495 | 1.05171941 | -2.06867112 | 0.22134036 | -2.17566156 | 0.03857696 | 0.31497635 | Down |
| Gng2    | 975.13034  | 0.59580147 | 2.99040278  | 3.43827841 | 1.78168637  | 0.0027861  | 0.10679637 | Up   |
| Gng4    | 163.935035 | 1.15326328 | 2.29559908  | 6.26550207 | 2.64743012  | 0.02169882 | 0.24233104 | Up   |
| Golga7b | 30.4478516 | 1.15994905 | 3.34310832  | 14.7009279 | 3.87783532  | 0.00082846 | 0.06581161 | Up   |
| Gp1ba   | 512.862808 | 0.78987861 | -2.22556842 | 0.29567232 | -1.75792888 | 0.0260431  | 0.25992764 | Down |
| Gp5     | 31.8396636 | 1.03406423 | -2.33977966 | 0.1869232  | -2.41948244 | 0.01929512 | 0.23171925 | Down |
| Gp6     | 570.599303 | 1.19837516 | -2.55912987 | 0.11934436 | -3.06679767 | 0.01049345 | 0.17495561 | Down |
| Gp9     | 89.1856681 | 1.02613448 | -2.50149339 | 0.16877012 | -2.56686861 | 0.01236708 | 0.19129196 | Down |
| Gpd2    | 12881.4977 | 0.84772963 | -2.33690757 | 0.25330267 | -1.98106579 | 0.01944399 | 0.23287105 | Down |
| Gpm6b   | 3516.7151  | 0.3623958  | 3.85540181  | 2.63386501 | 1.39718141  | 0.00011554 | 0.02610979 | Up   |
| Gpr137c | 17.6328619 | 1.03409222 | 2.07812674  | 4.43512477 | 2.14897469  | 0.03769769 | 0.31315709 | Up   |
| Gpr149  | 11.5018582 | 0.72035617 | 2.7592394   | 3.96586378 | 1.98763512  | 0.00579361 | 0.13819643 | Up   |
| Gpr158  | 379.336417 | 1.40926302 | 2.08845229  | 7.69103935 | 2.94317857  | 0.03675705 | 0.30979686 | Up   |
| Gpr3711 | 1136.53939 | 0.65845773 | 2.58578528  | 3.25493853 | 1.7026303   | 0.00971574 | 0.1693839  | Up   |
| Gpr85   | 87.5909092 | 0.57549905 | 2.84861516  | 3.1153091  | 1.63937531  | 0.004391   | 0.1260907  | Up   |
| Gprin1  | 102.040895 | 0.73510143 | 3.34749684  | 5.50502728 | 2.46074971  | 0.00081545 | 0.06507285 | Up   |
| Gprin2  | 35.8792317 | 0.79478318 | 2.79257644  | 4.65729666 | 2.21949278  | 0.00522901 | 0.13285169 | Up   |
| Grhl3   | 16.9339345 | 0.71993668 | 2.60986275  | 3.67803684 | 1.87893593  | 0.00905786 | 0.16516558 | Up   |
| Gria1   | 89.47261   | 0.8573992  | 3.31314355  | 7.1636092  | 2.84068664  | 0.00092254 | 0.06981054 | Up   |

|           |            |            |             |            |             |            |            |      |
|-----------|------------|------------|-------------|------------|-------------|------------|------------|------|
| Grik2     | 549.093605 | 0.57147287 | 2.83689622  | 3.07632776 | 1.62120922  | 0.00455544 | 0.12755237 | Up   |
| Grip1     | 18.5627257 | 0.70573889 | 2.23574882  | 2.98525647 | 1.57785488  | 0.02536823 | 0.25794959 | Up   |
| Grk3      | 627.035519 | 0.67282211 | 2.60056254  | 3.36292351 | 1.74971596  | 0.00930711 | 0.16673014 | Up   |
| Grm2      | 5.55507233 | 0.99530924 | -2.47854721 | 0.18087677 | -2.46692094 | 0.01319187 | 0.19570985 | Down |
| Grm3      | 15.2456425 | 0.92985719 | 1.99167925  | 3.60994603 | 1.85197727  | 0.04640626 | 0.33980433 | Up   |
| Grm7      | 140.294141 | 1.50788407 | 2.09557541  | 8.93758334 | 3.15988479  | 0.03611987 | 0.30678301 | Up   |
| Gsta3     | 13.5236018 | 0.75107913 | 2.79043554  | 4.27474361 | 2.09583789  | 0.00526372 | 0.13324165 | Up   |
| Gstm6     | 14.7665607 | 1.06233603 | 2.91457561  | 8.55198129 | 3.0962587   | 0.00356173 | 0.11765336 | Up   |
| Gzma      | 17.18853   | 0.72255556 | -2.10028481 | 0.34927312 | -1.51757246 | 0.03570379 | 0.30500663 | Down |
| Haa0      | 9.64532915 | 0.69829984 | -2.26916317 | 0.3334272  | -1.58455629 | 0.0232584  | 0.25061985 | Down |
| Hadhb     | 35753.7984 | 0.72295461 | -1.98751657 | 0.36936414 | -1.43688427 | 0.04686518 | 0.34031564 | Down |
| Haghl     | 21.9216296 | 0.78739957 | 3.15484629  | 5.5949475  | 2.48412459  | 0.00160583 | 0.08814902 | Up   |
| Hand1     | 88.9329393 | 0.94904141 | 2.69068736  | 5.87086765 | 2.55357373  | 0.0071305  | 0.1494308  | Up   |
| Hap1      | 196.951072 | 0.76907627 | 2.44909358  | 3.68979268 | 1.88353976  | 0.01432162 | 0.2027956  | Up   |
| Hapl4     | 578.270947 | 1.12571311 | -2.06107501 | 0.2002426  | -2.32017916 | 0.03929588 | 0.31695936 | Down |
| Hcn3      | 76.83221   | 1.00569367 | 2.24035785  | 4.76710605 | 2.25311372  | 0.0250677  | 0.25706106 | Up   |
| Hcn4      | 91.3222279 | 0.8205874  | 3.55075772  | 7.53551989 | 2.91370705  | 0.00038412 | 0.04667955 | Up   |
| Hebp2     | 77.8982432 | 0.56080744 | 2.41523488  | 2.55705236 | 1.3544817   | 0.01572507 | 0.21203476 | Up   |
| Hecw1     | 225.152654 | 0.61072746 | 2.25062547  | 2.59281412 | 1.37451878  | 0.02440927 | 0.25464478 | Up   |
| Hepacam   | 443.93987  | 0.45589484 | 3.32314727  | 2.85799956 | 1.51500569  | 0.00089008 | 0.0690267  | Up   |
| Hgd       | 57.6143851 | 0.81289933 | -2.26578134 | 0.27896342 | -1.84185213 | 0.02346477 | 0.25149425 | Down |
| Hhipl2    | 9.01044209 | 0.84799878 | -2.48852959 | 0.23160366 | -2.11027007 | 0.01282726 | 0.19430139 | Down |
| Hif3a     | 369.267648 | 0.51556546 | 2.05285112  | 2.08259042 | 1.05837913  | 0.04008702 | 0.32076924 | Up   |
| Hist3h2ba | 25.0067539 | 0.6104245  | 3.15550999  | 3.80052997 | 1.92620061  | 0.00160218 | 0.08814902 | Up   |
| Hk3       | 28.5488243 | 0.63116848 | -3.42889234 | 0.22310446 | -2.16420877 | 0.00060605 | 0.05707898 | Down |
| Hmgcll1   | 95.2244758 | 0.41165541 | 3.04548691  | 2.38450726 | 1.25369118  | 0.00232304 | 0.1020795  | Up   |
| Hmx1      | 27.971859  | 1.34791593 | 3.53143605  | 27.0973321 | 4.76007891  | 0.00041331 | 0.04805342 | Up   |
| Hpd1      | 136.081349 | 0.71012539 | -2.29954069 | 0.32242551 | -1.63296222 | 0.02147426 | 0.24110295 | Down |
| Hprt1     | 111.412382 | 0.74892069 | -3.75159299 | 0.1426305  | -2.80964562 | 0.00017571 | 0.0328175  | Down |
| Hpse      | 517.905331 | 0.70319696 | -2.7727859  | 0.25884949 | -1.94981462 | 0.00555787 | 0.13571584 | Down |
| Hrh1      | 96.8480437 | 0.38288904 | 3.54095026  | 2.55937412 | 1.35579105  | 0.00039869 | 0.0474496  | Up   |
| Hs3st2    | 93.5575518 | 0.75174595 | 2.32781636  | 3.36341432 | 1.74992651  | 0.01992186 | 0.23375308 | Up   |

|         |            |            |             |            |             |            |            |      |
|---------|------------|------------|-------------|------------|-------------|------------|------------|------|
| Hs3st4  | 4.83539505 | 1.11702492 | -2.3646274  | 0.16027844 | -2.64134773 | 0.01804822 | 0.22584071 | Down |
| Hs3st5  | 30.7233969 | 1.00049403 | 2.00678885  | 4.02162972 | 2.00778025  | 0.04477215 | 0.33535353 | Up   |
| Htr1d   | 25.6047682 | 0.88022352 | 3.99472868  | 11.4418953 | 3.51625415  | 6.48E-05   | 0.0183399  | Up   |
| Idh3a   | 11142.7014 | 0.6582003  | -2.23346493 | 0.36096547 | -1.47006728 | 0.0255183  | 0.25815565 | Down |
| Igsf11  | 509.025251 | 0.71200993 | 2.67083099  | 3.736424   | 1.90165818  | 0.00756637 | 0.15410122 | Up   |
| Igsf23  | 6.97290915 | 0.58189304 | 2.09441945  | 2.3274144  | 1.21872811  | 0.03622263 | 0.30730898 | Up   |
| Il1f10  | 5.39268152 | 0.80819302 | -2.17044661 | 0.2964499  | -1.7541398  | 0.02997303 | 0.27900662 | Down |
| Il1rn   | 97.2906681 | 0.49795808 | -2.45577102 | 0.42842928 | -1.22287102 | 0.01405827 | 0.20109326 | Down |
| Il20ra  | 8.14770054 | 1.41230242 | 3.79105304  | 40.9023941 | 5.35411339  | 0.00015001 | 0.03107466 | Up   |
| Il21    | 5.56191857 | 1.44151735 | 2.28881432  | 9.84482488 | 3.29936554  | 0.02209014 | 0.24488791 | Up   |
| Il2rb   | 131.476335 | 0.42126825 | -2.40292111 | 0.49576407 | -1.01227438 | 0.0162647  | 0.21635775 | Down |
| Impa2   | 2533.56327 | 0.69941372 | -2.49911698 | 0.2977314  | -1.7479167  | 0.01245032 | 0.19164284 | Down |
| Impg1   | 2.8685072  | 0.84248203 | -2.20681367 | 0.27562891 | -1.85920086 | 0.02732708 | 0.26608664 | Down |
| Ina     | 281.940559 | 1.40444826 | 2.21768394  | 8.6615328  | 3.11462236  | 0.02657639 | 0.26182666 | Up   |
| Ino80b  | 35.3147252 | 0.57047705 | -2.59271362 | 0.35871659 | -1.47908361 | 0.0095222  | 0.16857431 | Down |
| Insrr   | 193.129771 | 1.43804873 | 2.75470256  | 15.5775508 | 3.96139651  | 0.00587455 | 0.13824882 | Up   |
| Iqsec3  | 235.128637 | 0.73267779 | 3.02463175  | 4.64629414 | 2.21608049  | 0.00248936 | 0.10289734 | Up   |
| Irg1    | 12.774571  | 0.74050433 | -3.62943226 | 0.15522036 | -2.68761032 | 0.00028405 | 0.03982596 | Down |
| Irx5    | 11.8018887 | 0.58296067 | 2.80789769  | 3.10995545 | 1.63689392  | 0.00498661 | 0.13034697 | Up   |
| Isl1    | 63.842909  | 0.95686444 | 2.23166664  | 4.39359674 | 2.13540246  | 0.025637   | 0.25860371 | Up   |
| Islr2   | 69.7966739 | 0.76969728 | 2.0326804   | 2.95784937 | 1.56454858  | 0.04208482 | 0.32843794 | Up   |
| Itga2b  | 2624.04854 | 1.11868607 | -2.56467519 | 0.13687526 | -2.8690664  | 0.01032724 | 0.17449959 | Down |
| Itgad   | 33.4794309 | 0.42599711 | -3.09403326 | 0.4010769  | -1.31804922 | 0.00197455 | 0.09602565 | Down |
| Itgal   | 479.704289 | 0.41201411 | -3.1482552  | 0.40693617 | -1.29712558 | 0.00164248 | 0.08858243 | Down |
| Itgax   | 740.419881 | 0.67648836 | -3.43525366 | 0.19972556 | -2.32390912 | 0.000592   | 0.05707898 | Down |
| Itgb2   | 703.87636  | 0.38200683 | -2.82645763 | 0.47311863 | -1.07972612 | 0.0047066  | 0.12835359 | Down |
| Itgb4   | 14555.7776 | 0.43519789 | 3.44083015  | 2.8234166  | 1.49744202  | 0.00057993 | 0.05707898 | Up   |
| Jakmip1 | 83.772559  | 1.09024914 | 2.49202861  | 6.57473181 | 2.71693205  | 0.01270158 | 0.1933019  | Up   |
| Jakmip2 | 34.2959143 | 1.20938731 | 2.85870321  | 10.9836023 | 3.45727939  | 0.00425377 | 0.12463794 | Up   |
| Jaml    | 53.5981841 | 0.40468348 | -2.59480443 | 0.48294323 | -1.05007449 | 0.00946448 | 0.16836335 | Down |
| Jph3    | 563.710969 | 0.23269901 | 4.96043961  | 2.22574664 | 1.15428938  | 7.03E-07   | 0.00123478 | Up   |
| Kbtbd11 | 1718.43796 | 0.60431398 | -2.17131561 | 0.40271849 | -1.31215639 | 0.02990732 | 0.27894535 | Down |

|           |            |            |             |            |             |            |            |      |
|-----------|------------|------------|-------------|------------|-------------|------------|------------|------|
| Kcna6     | 131.860465 | 1.00058629 | 2.46528395  | 5.52789154 | 2.46672931  | 0.01369047 | 0.19905946 | Up   |
| Kcnb2     | 156.122204 | 1.04872465 | 2.98167788  | 8.73591659 | 3.12695908  | 0.00286673 | 0.10870063 | Up   |
| Kcnc3     | 14.8574987 | 1.05102334 | 2.65435121  | 6.91526763 | 2.78978509  | 0.00794611 | 0.15640298 | Up   |
| Kcnc4     | 420.753284 | 0.5019921  | 2.7482819   | 2.60199067 | 1.37961579  | 0.00599085 | 0.14024376 | Up   |
| Kcnd2     | 38.7108067 | 1.25273867 | 2.06779026  | 6.02266006 | 2.59040083  | 0.03865975 | 0.31497635 | Up   |
| Kcnf1     | 16.6398972 | 1.08931281 | -1.99248097 | 0.22214367 | -2.17043504 | 0.04631831 | 0.33978103 | Down |
| Kcnh5     | 3.25881431 | 2.13621741 | 2.10566611  | 22.5985859 | 4.4981606   | 0.03523337 | 0.30366076 | Up   |
| Kcnh7     | 98.6273414 | 0.78865563 | 2.23159221  | 3.38688211 | 1.75995777  | 0.02564193 | 0.25860371 | Up   |
| Kcnh8     | 91.622058  | 0.77160417 | 3.08359785  | 5.20290349 | 2.37931695  | 0.00204514 | 0.09738633 | Up   |
| Kcnj10    | 253.892554 | 0.49455245 | 3.18385147  | 2.97849091 | 1.57458156  | 0.0014533  | 0.08434388 | Up   |
| Kcnj3     | 5.34336645 | 1.39959413 | 2.45630414  | 10.8365142 | 3.43782885  | 0.01403743 | 0.20109326 | Up   |
| Kcnj9     | 55.4674757 | 0.32509229 | 3.37511397  | 2.13942565 | 1.09722354  | 0.00073785 | 0.06237718 | Up   |
| Kcnk1     | 63.7338721 | 0.49289635 | 2.45713257  | 2.31515963 | 1.21111167  | 0.0140051  | 0.20109326 | Up   |
| Kcnk10    | 46.1509047 | 1.18859098 | 2.03283021  | 5.33764605 | 2.41620364  | 0.04206968 | 0.32843794 | Up   |
| Kcnk16    | 3.07960044 | 1.28853423 | 3.83773547  | 30.8041651 | 4.94505353  | 0.00012417 | 0.02725002 | Up   |
| Kcnk6     | 34.7715646 | 0.45635875 | 4.58590956  | 4.2658107  | 2.09281994  | 4.52E-06   | 0.00343685 | Up   |
| Kcnk9     | 28.1262826 | 1.35020857 | 2.09986362  | 7.13668382 | 2.83525386  | 0.03574084 | 0.30500663 | Up   |
| Kcnmb4    | 110.463406 | 0.99371441 | 2.18123617  | 4.49252279 | 2.16752582  | 0.02916595 | 0.27512457 | Up   |
| Kcnn2     | 5.26401129 | 1.49144892 | 1.96026183  | 7.58753036 | 2.92363038  | 0.0499652  | 0.3507181  | Up   |
| Kcnq2     | 256.109591 | 0.46041778 | 2.65073952  | 2.33019    | 1.2204476   | 0.00803158 | 0.15736869 | Up   |
| Kcnq3     | 824.1815   | 0.70403435 | 2.72946482  | 3.78852688 | 1.92163698  | 0.00634372 | 0.14333382 | Up   |
| Kiaa0895l | 146.981984 | 0.61879854 | 2.91796593  | 3.49582524 | 1.80563307  | 0.00352323 | 0.11765336 | Up   |
| Kif1a     | 2804.45213 | 1.00517026 | 2.68418082  | 6.48928146 | 2.69805874  | 0.00727078 | 0.15052566 | Up   |
| Kif21a    | 1378.122   | 0.72404676 | 3.08334019  | 4.69941919 | 2.23248246  | 0.00204691 | 0.09738633 | Up   |
| Kif2c     | 79.7847767 | 0.41683631 | 3.07981     | 2.43475507 | 1.28377665  | 0.00207133 | 0.09744337 | Up   |
| Kif5a     | 923.931699 | 0.84409588 | 3.00430015  | 5.79945523 | 2.53591739  | 0.00266193 | 0.1046542  | Up   |
| Kif5c     | 1105.84685 | 0.66234582 | 2.99412736  | 3.95354742 | 1.98314773  | 0.00275231 | 0.10619684 | Up   |
| Kir3dl1   | 2.41558797 | 0.94810052 | -2.53988574 | 0.18840811 | -2.408067   | 0.01108887 | 0.18143167 | Down |
| Klb       | 832.134069 | 0.58382255 | -2.10016067 | 0.42746519 | -1.22612116 | 0.03571471 | 0.30500663 | Down |
| Klf5      | 142.198197 | 0.51644164 | 3.71805205  | 3.78464212 | 1.92015688  | 0.00020076 | 0.03632799 | Up   |
| Klhdc8a   | 139.046706 | 0.32741139 | -5.01380693 | 0.32050583 | -1.64157748 | 5.34E-07   | 0.00104094 | Down |
| Klhl34    | 176.656042 | 0.59246403 | 3.3620228   | 3.97754313 | 1.99187758  | 0.00077374 | 0.06381172 | Up   |

|              |            |            |             |            |             |            |            |      |
|--------------|------------|------------|-------------|------------|-------------|------------|------------|------|
| Klrb1a       | 19.9951775 | 0.53564104 | -3.373739   | 0.28576219 | -1.80711306 | 0.00074155 | 0.06237718 | Down |
| Klrc1        | 8.6896519  | 0.61376367 | -1.97649723 | 0.43134012 | -1.2131022  | 0.04809849 | 0.34465596 | Down |
| Klrd1        | 29.5738951 | 0.42387884 | -2.91428052 | 0.42475362 | -1.23530184 | 0.00356509 | 0.11765336 | Down |
| Klre1        | 7.86694873 | 0.8557334  | -2.24957178 | 0.26333411 | -1.92503371 | 0.02447614 | 0.25464478 | Down |
| Klri2        | 1.85433979 | 1.35581231 | -2.07038081 | 0.14288756 | -2.80704778 | 0.0384167  | 0.31463868 | Down |
| Kndc1        | 63.9706341 | 1.24495413 | 2.67301832  | 10.0406809 | 3.3277852   | 0.00751721 | 0.15363471 | Up   |
| Krt22        | 32.3121723 | 0.64301783 | 2.40659878  | 2.92307313 | 1.54748592  | 0.01610185 | 0.21529631 | Up   |
| Krt26        | 4.94853035 | 1.33301691 | 3.08009725  | 17.2177143 | 4.10582173  | 0.00206933 | 0.09744337 | Up   |
| Krt28        | 1.19050562 | 1.37933246 | 2.17955772  | 8.03520435 | 3.00633472  | 0.02929026 | 0.27572109 | Up   |
| Krt7         | 15.8065253 | 0.64323146 | -3.38478682 | 0.22110425 | -2.17720136 | 0.00071234 | 0.06196886 | Down |
| Ksr2         | 43.1358975 | 1.17928711 | 2.23351718  | 6.20726623 | 2.63395802  | 0.02551486 | 0.25815565 | Up   |
| L1cam        | 2389.3209  | 0.68652688 | 3.197522    | 4.57948324 | 2.19518481  | 0.00138614 | 0.08235285 | Up   |
| LOC100302465 | 1.51336862 | 1.58792152 | 2.11545482  | 10.2615462 | 3.35917623  | 0.0343912  | 0.3004901  | Up   |
| LOC100360933 | 1.81491944 | 2.02773246 | 2.0631428   | 18.1701903 | 4.18350162  | 0.03909906 | 0.31646987 | Up   |
| LOC100361180 | 13.8496262 | 0.47292415 | 2.70962719  | 2.43082853 | 1.28144813  | 0.00673589 | 0.14589419 | Up   |
| LOC100362172 | 5.44410452 | 1.05500362 | -2.84298663 | 0.12505536 | -2.99936119 | 0.00446929 | 0.12655312 | Down |
| LOC100362216 | 14.5267352 | 0.7844659  | 2.36586943  | 3.61988505 | 1.85594388  | 0.01798779 | 0.22556685 | Up   |
| LOC100362684 | 57.3948672 | 0.32705504 | 3.25541295  | 2.09173374 | 1.06469922  | 0.00113228 | 0.07513311 | Up   |
| LOC100363193 | 171.440894 | 0.78181584 | -2.30011903 | 0.28751926 | -1.79826948 | 0.02144148 | 0.24110295 | Down |
| LOC100363993 | 5.06547474 | 1.23344911 | 2.6147513   | 9.35127224 | 3.22516266  | 0.00892924 | 0.16512064 | Up   |
| LOC100364027 | 5.86745139 | 1.00193066 | 3.5532908   | 11.7953881 | 3.56015099  | 0.00038044 | 0.04667955 | Up   |
| LOC100364194 | 37.855433  | 1.42731807 | -2.77115145 | 0.06446614 | -3.95531453 | 0.00558584 | 0.1359239  | Down |
| LOC100365773 | 128.20084  | 0.55575292 | 3.58755189  | 3.98282596 | 1.99379244  | 0.0003338  | 0.04392686 | Up   |
| LOC100909464 | 14.7799461 | 0.62189241 | 2.20964842  | 2.59217581 | 1.37416357  | 0.02712957 | 0.26519308 | Up   |
| LOC100909595 | 131.165449 | 0.52961053 | 2.12531315  | 2.1819049  | 1.12558822  | 0.03356049 | 0.29667069 | Up   |
| LOC100909671 | 6.49639476 | 0.91946283 | -2.25209744 | 0.23804069 | -2.07071988 | 0.02431611 | 0.25448138 | Down |
| LOC100909709 | 26.528907  | 0.86541686 | 2.24467763  | 3.84392948 | 1.94258187  | 0.02478884 | 0.25584526 | Up   |
| LOC100909856 | 48.7203356 | 0.73658926 | 2.27443659  | 3.19391421 | 1.67532556  | 0.02293975 | 0.24906014 | Up   |
| LOC100909950 | 26.7884342 | 0.83484843 | 2.40083538  | 4.01203349 | 2.00433365  | 0.01635769 | 0.21667611 | Up   |
| LOC100909954 | 68.4130314 | 0.87271745 | 2.41690652  | 4.31474855 | 2.10927649  | 0.01565304 | 0.21178673 | Up   |
| LOC100910018 | 3.20159798 | 1.2708121  | 2.73944141  | 11.1681266 | 3.48131529  | 0.00615437 | 0.14151811 | Up   |
| LOC100910069 | 22.6668332 | 0.59926015 | 1.98018215  | 2.27622671 | 1.18664425  | 0.04768306 | 0.34378804 | Up   |

|              |            |            |             |            |             |            |            |      |
|--------------|------------|------------|-------------|------------|-------------|------------|------------|------|
| LOC100910288 | 128.918561 | 0.55481718 | 3.05524131  | 3.2379941  | 1.69510036  | 0.0022488  | 0.10150804 | Up   |
| LOC100910462 | 5.53927816 | 2.49238755 | 2.32400489  | 55.4194647 | 5.79232087  | 0.02012523 | 0.23414087 | Up   |
| LOC100910650 | 209.341064 | 1.08788341 | -2.86646477 | 0.11515273 | -3.11837946 | 0.00415084 | 0.12299483 | Down |
| LOC100910851 | 12.9057808 | 1.11940003 | 2.03246218  | 4.84044013 | 2.27513823  | 0.04210689 | 0.32843794 | Up   |
| LOC100910954 | 4.07061533 | 1.44485325 | -3.15408547 | 0.04247652 | -4.55719063 | 0.00161002 | 0.08814902 | Down |
| LOC100911034 | 218.533099 | 0.42567346 | -3.87421813 | 0.31882754 | -1.64915183 | 0.00010697 | 0.02503897 | Down |
| LOC100911372 | 695.201711 | 0.30620482 | 3.69557805  | 2.19102177 | 1.13160382  | 0.00021939 | 0.03668152 | Up   |
| LOC100911374 | 99.8389815 | 0.67457556 | 3.46016845  | 5.04252061 | 2.33414508  | 0.00053984 | 0.05478259 | Up   |
| LOC100911581 | 5.81811464 | 1.02845316 | 3.21306311  | 9.87982108 | 3.30448491  | 0.00131327 | 0.08005501 | Up   |
| LOC100911672 | 112.477437 | 0.497922   | 2.30199791  | 2.21332516 | 1.14621542  | 0.02133529 | 0.24103124 | Up   |
| LOC100911685 | 203.595841 | 0.48104775 | -2.85240647 | 0.38631679 | -1.3721437  | 0.00433896 | 0.12555013 | Down |
| LOC100911761 | 7.2401431  | 0.82583702 | 2.03654264  | 3.20839621 | 1.68185231  | 0.0416959  | 0.32752266 | Up   |
| LOC100911867 | 69.5883988 | 0.69635022 | 3.41758037  | 5.20476431 | 2.37983283  | 0.0006318  | 0.05893899 | Up   |
| LOC100912262 | 68.4500623 | 0.68243824 | -2.13989589 | 0.36340576 | -1.46034679 | 0.03236318 | 0.29136821 | Down |
| LOC100912393 | 9.17862485 | 1.80058813 | 2.00973685  | 12.2839983 | 3.61870832  | 0.04445905 | 0.33535353 | Up   |
| LOC100912475 | 15.5068035 | 0.52399424 | 3.95464647  | 4.20530941 | 2.07221195  | 7.66E-05   | 0.01979495 | Up   |
| LOC100912573 | 11.5594201 | 0.78347285 | 2.21337953  | 3.32677148 | 1.73412277  | 0.02687149 | 0.26355078 | Up   |
| LOC100912615 | 32.7389946 | 0.67365717 | 2.5975682   | 3.3632836  | 1.74987044  | 0.00938865 | 0.16767761 | Up   |
| LOC102546424 | 14.4758592 | 1.8452659  | 3.36017     | 73.5374441 | 6.20040713  | 0.00077895 | 0.06381172 | Up   |
| LOC102547811 | 10.6156012 | 1.071539   | 2.49052078  | 6.35851624 | 2.66869015  | 0.0127556  | 0.19355002 | Up   |
| LOC102549011 | 85.9835639 | 0.45507518 | -2.68181408 | 0.42915567 | -1.22042703 | 0.00732241 | 0.15096738 | Down |
| LOC102549716 | 2.46471191 | 1.37748799 | -2.37929884 | 0.1031306  | -3.27745557 | 0.01734561 | 0.22243936 | Down |
| LOC102550714 | 14.8370948 | 0.58921669 | -2.19385183 | 0.40819938 | -1.29265412 | 0.02824606 | 0.27070894 | Down |
| LOC102551177 | 5.56409489 | 1.26372462 | 1.96846019  | 5.60840913 | 2.4875916   | 0.04901511 | 0.34818661 | Up   |
| LOC102551539 | 22.03352   | 0.51110689 | -3.11018916 | 0.33225456 | -1.58963912 | 0.00186968 | 0.09410949 | Down |
| LOC102551716 | 162.141934 | 0.57267532 | 2.84793646  | 3.09715359 | 1.63094293  | 0.00440037 | 0.1260907  | Up   |
| LOC102551823 | 16.9722351 | 1.59427018 | -2.41582254 | 0.06927728 | -3.85147383 | 0.01569971 | 0.21185559 | Down |
| LOC102552286 | 1.91228338 | 1.49944604 | -2.27557242 | 0.09394121 | -3.41209807 | 0.02287161 | 0.24891719 | Down |
| LOC102552640 | 103.268382 | 0.60499162 | 2.7218422   | 3.13114805 | 1.64669173  | 0.00649191 | 0.14500259 | Up   |
| LOC102553088 | 7.5006461  | 1.14415529 | 2.7567037   | 8.90180024 | 3.15409713  | 0.00583872 | 0.13824882 | Up   |
| LOC102553691 | 7.16120027 | 0.7723489  | -2.34893363 | 0.28436261 | -1.81419631 | 0.01882726 | 0.22937642 | Down |
| LOC102553825 | 49.6699686 | 1.1584022  | 2.35430447  | 6.62183685 | 2.72723147  | 0.0185574  | 0.22819978 | Up   |

|              |            |            |             |            |             |            |            |      |
|--------------|------------|------------|-------------|------------|-------------|------------|------------|------|
| LOC102554066 | 13.1788427 | 0.53705952 | 2.35981641  | 2.40720979 | 1.26736188  | 0.01828398 | 0.22717167 | Up   |
| LOC102556178 | 2.77891228 | 1.35329078 | 3.14782516  | 19.1586335 | 4.25992276  | 0.0016449  | 0.08858243 | Up   |
| LOC102556339 | 104.117022 | 0.60185763 | 4.2040814   | 5.7767517  | 2.53025849  | 2.62E-05   | 0.00979194 | Up   |
| LOC102557071 | 2.05286178 | 1.32126232 | 2.47321673  | 9.6315505  | 3.26776806  | 0.01339029 | 0.19691729 | Up   |
| LOC102557539 | 7.01816883 | 0.76363977 | -2.07951536 | 0.33263211 | -1.58800063 | 0.03757001 | 0.31284146 | Down |
| LOC103690005 | 45.3753866 | 0.80942978 | 3.40307687  | 6.74842938 | 2.75455177  | 0.00066632 | 0.05968281 | Up   |
| LOC103690068 | 207.388579 | 0.83805935 | 3.62815825  | 8.2284001  | 3.04061194  | 0.00028545 | 0.03982596 | Up   |
| LOC103690082 | 299.265367 | 0.52735543 | 2.27272839  | 2.29506603 | 1.19853566  | 0.02304255 | 0.249713   | Up   |
| LOC103690099 | 14.8090287 | 1.12939393 | -2.74146728 | 0.11693701 | -3.09619652 | 0.00611655 | 0.14147835 | Down |
| LOC103690139 | 16.2377311 | 0.44864381 | 2.57182457  | 2.22504292 | 1.15383317  | 0.01011641 | 0.1727663  | Up   |
| LOC103690163 | 9.37069012 | 0.81564991 | 2.53836252  | 4.2000752  | 2.07041516  | 0.01113726 | 0.18175249 | Up   |
| LOC103690896 | 38.559015  | 0.59097854 | 2.20584417  | 2.46845194 | 1.30360656  | 0.02739491 | 0.26644556 | Up   |
| LOC103691522 | 2.07212877 | 1.95067728 | -2.36095982 | 0.04107856 | -4.60547069 | 0.01822771 | 0.2271154  | Down |
| LOC103692002 | 1270.50834 | 0.60825877 | -2.0670664  | 0.41832285 | -1.25731127 | 0.0387279  | 0.31497635 | Down |
| LOC103692025 | 56.5029453 | 0.7873309  | 2.84672959  | 4.72828883 | 2.24131817  | 0.00441709 | 0.1260907  | Up   |
| LOC103692128 | 63.640431  | 0.53446584 | 2.8691327   | 2.89477944 | 1.53345343  | 0.00411599 | 0.12268308 | Up   |
| LOC103692165 | 12.9857567 | 0.59125163 | 6.090529    | 12.1344362 | 3.60103517  | 1.13E-09   | 6.59E-06   | Up   |
| LOC103692936 | 2.03523558 | 2.18527466 | 1.99087855  | 20.4016856 | 4.35061645  | 0.04649424 | 0.33996372 | Up   |
| LOC103693260 | 2.65367637 | 1.57932492 | 1.97814111  | 8.71878776 | 3.12412756  | 0.04791279 | 0.34452013 | Up   |
| LOC103694491 | 19.1079247 | 1.06447818 | 2.02905955  | 4.46880658 | 2.1598896   | 0.04245223 | 0.32965165 | Up   |
| LOC103694513 | 32.0859933 | 0.79777689 | 2.04931496  | 3.10565188 | 1.63489612  | 0.04043133 | 0.32164121 | Up   |
| LOC108348048 | 20.3870176 | 0.53158172 | 2.1564991   | 2.21354009 | 1.1463555   | 0.03104471 | 0.28410184 | Up   |
| LOC108348064 | 5.64754557 | 1.0208823  | 2.02900329  | 4.20286624 | 2.07137354  | 0.04245795 | 0.32965165 | Up   |
| LOC108348081 | 21.8594821 | 0.63142894 | 2.18580889  | 2.60301387 | 1.380183    | 0.02882959 | 0.27373298 | Up   |
| LOC108348096 | 65.1353645 | 0.70861686 | 3.13428348  | 4.66218458 | 2.22100612  | 0.00172274 | 0.08974624 | Up   |
| LOC108348121 | 2.16939111 | 2.10156587 | 2.11329251  | 21.7240838 | 4.44122343  | 0.03457574 | 0.30124649 | Up   |
| LOC108348144 | 82.4088383 | 0.84997766 | 2.64823792  | 4.75993894 | 2.25094307  | 0.00809126 | 0.15783343 | Up   |
| LOC108348212 | 12.820385  | 1.3776643  | -2.25342291 | 0.1162691  | -3.1044603  | 0.0242325  | 0.25413722 | Down |
| LOC108348243 | 1.9034282  | 1.13667967 | -2.11793861 | 0.18849292 | -2.40741776 | 0.03418027 | 0.30041322 | Down |
| LOC108348486 | 12.0567635 | 0.80302522 | -2.01280022 | 0.32616427 | -1.61632934 | 0.04413565 | 0.33509173 | Down |
| LOC108349691 | 7.93632463 | 0.58190853 | 2.06722176  | 2.30207363 | 1.20293398  | 0.03871326 | 0.31497635 | Up   |
| LOC108350198 | 19.9421763 | 0.52390965 | -2.00185273 | 0.48337341 | -1.04878997 | 0.04530057 | 0.33756666 | Down |

|              |            |            |             |            |             |            |            |      |
|--------------|------------|------------|-------------|------------|-------------|------------|------------|------|
| LOC108350550 | 30.9071404 | 0.77069331 | 2.37651082  | 3.5592197  | 1.83156099  | 0.01747725 | 0.2228254  | Up   |
| LOC108350623 | 4.26095953 | 0.85211078 | -2.39366577 | 0.24321963 | -2.0396684  | 0.01668094 | 0.21854523 | Down |
| LOC108350662 | 26.8276695 | 0.53187724 | 2.434351    | 2.45338883 | 1.2947759   | 0.01491852 | 0.20651932 | Up   |
| LOC108351322 | 14.0646243 | 0.49046665 | 2.48188008  | 2.32507849 | 1.21727942  | 0.01306912 | 0.19534092 | Up   |
| LOC108351600 | 6.73899714 | 1.75511099 | 2.07025853  | 12.4108799 | 3.6335335   | 0.03842814 | 0.31463868 | Up   |
| LOC108351885 | 5.71975596 | 1.24740014 | 4.27810938  | 40.4064656 | 5.33651426  | 1.88E-05   | 0.00808886 | Up   |
| LOC108351956 | 117.562587 | 0.5342447  | 2.79888776  | 2.81920999 | 1.49529094  | 0.0051279  | 0.13117495 | Up   |
| LOC108352087 | 131.905967 | 0.51788932 | -2.13522426 | 0.46464158 | -1.10580983 | 0.0327427  | 0.29255455 | Down |
| LOC108352182 | 1.32272753 | 1.25111588 | 2.50767258  | 8.79930144 | 3.13738899  | 0.01215292 | 0.18948197 | Up   |
| LOC108352192 | 1.45891515 | 1.4500283  | 2.28128446  | 9.90342139 | 3.30792703  | 0.02253162 | 0.24707378 | Up   |
| LOC108353239 | 14.3428945 | 0.96762401 | 2.47971272  | 5.27594519 | 2.39942958  | 0.01314883 | 0.19546216 | Up   |
| LOC290595    | 10.6116901 | 0.8738803  | -2.65457922 | 0.20029739 | -2.31978449 | 0.00794074 | 0.15640298 | Down |
| LOC317416    | 1.85893176 | 1.42200425 | 2.2014295   | 8.75703265 | 3.13044209  | 0.02770563 | 0.26813676 | Up   |
| LOC363324    | 11.900653  | 1.44950363 | 3.15409665  | 23.7832595 | 4.57187454  | 0.00160996 | 0.08814902 | Up   |
| LOC363337    | 8.27232545 | 1.187369   | 2.12301097  | 5.73899221 | 2.52079742  | 0.03375293 | 0.29792182 | Up   |
| LOC498236    | 4.14875705 | 0.74492702 | 2.964561    | 4.62156537 | 2.20838159  | 0.00303115 | 0.11204984 | Up   |
| LOC501317    | 5.18872415 | 1.04822785 | 2.93690575  | 8.44762861 | 3.07854641  | 0.00331505 | 0.11547418 | Up   |
| LOC501396    | 17.5349661 | 0.74229493 | 2.35618088  | 3.36121105 | 1.74898113  | 0.01846392 | 0.22795546 | Up   |
| LOC502618    | 36.1332251 | 0.40073484 | 2.53141946  | 2.02010175 | 1.01442796  | 0.01136019 | 0.18314004 | Up   |
| LOC679739    | 13.0499954 | 0.50789951 | -2.73357578 | 0.38199303 | -1.3883818  | 0.00626507 | 0.14333382 | Down |
| LOC680316    | 7.69874637 | 2.40477625 | 2.60617175  | 77.025269  | 6.26725991  | 0.00915605 | 0.16561185 | Up   |
| LOC680377    | 3.45508545 | 1.02276758 | -2.92303706 | 0.12590543 | -2.98958754 | 0.00346635 | 0.11765336 | Down |
| LOC681300    | 10.5724647 | 0.50963054 | 2.11138325  | 2.10821993 | 1.07602538  | 0.03473938 | 0.30182569 | Up   |
| LOC681325    | 15.1582882 | 0.48104539 | -2.92762878 | 0.37674955 | -1.40832232 | 0.00341558 | 0.11757617 | Down |
| LOC685668    | 50.7306135 | 0.86856618 | 2.50624075  | 4.52160813 | 2.17683596  | 0.01220225 | 0.18968716 | Up   |
| LOC688613    | 16.77549   | 1.29281221 | 2.72999536  | 11.5464011 | 3.52937135  | 0.00633352 | 0.14333382 | Up   |
| LOC689268    | 7.64006653 | 0.83182553 | 2.26004759  | 3.68066203 | 1.87996528  | 0.0238183  | 0.25252784 | Up   |
| LOC689679    | 9.53569913 | 0.55676943 | 3.37335352  | 3.67611049 | 1.87818013  | 0.00074259 | 0.06237718 | Up   |
| LOC690348    | 3.73035761 | 0.66642642 | -2.21511579 | 0.35943139 | -1.47621169 | 0.02675212 | 0.26282047 | Down |
| LOC690918    | 14.7779433 | 0.63729595 | 2.02587445  | 2.44711448 | 1.29108159  | 0.04277765 | 0.33056156 | Up   |
| LOC691414    | 31.0087472 | 0.78558807 | 3.00399006  | 5.1333433  | 2.35989875  | 0.00266464 | 0.1046542  | Up   |
| LOC691551    | 12.3770062 | 0.61893725 | 3.70390366  | 4.89898869 | 2.29248396  | 0.00021231 | 0.03632799 | Up   |



|           |            |            |             |            |             |            |            |      |
|-----------|------------|------------|-------------|------------|-------------|------------|------------|------|
| LOC691712 | 6.22672153 | 1.32387007 | 3.04734619  | 16.3848484 | 4.03429042  | 0.00230872 | 0.1020795  | Up   |
| LRRTM1    | 145.239058 | 0.9722111  | 2.24838775  | 4.55012927 | 2.18590753  | 0.02455148 | 0.25464478 | Up   |
| Lad1      | 13.9054063 | 0.80486667 | 2.84144721  | 4.88035517 | 2.28698614  | 0.00449093 | 0.12675682 | Up   |
| Lair1     | 15.5560599 | 0.63488779 | 2.0458801   | 2.46041946 | 1.29890429  | 0.04076817 | 0.32276175 | Up   |
| Lamb3     | 31.7715256 | 0.67161804 | -2.28254928 | 0.34555775 | -1.53300127 | 0.02245693 | 0.24667005 | Down |
| Lancl3    | 25.8085477 | 0.67940036 | 2.35898639  | 3.0371038  | 1.60269621  | 0.01832493 | 0.22733939 | Up   |
| Lefty1    | 6.49482824 | 1.15140649 | -2.50409985 | 0.13553743 | -2.88323683 | 0.01227634 | 0.19039169 | Down |
| Letmd1    | 7582.2419  | 0.61656682 | -2.13366041 | 0.40177391 | -1.31554421 | 0.03287059 | 0.29293201 | Down |
| Lgi1      | 126.149954 | 0.90481877 | 2.29524148  | 4.21863878 | 2.07677756  | 0.02171929 | 0.2424055  | Up   |
| Lgi3      | 254.049963 | 1.00226032 | 2.55784716  | 5.91192806 | 2.56362871  | 0.01053224 | 0.1754307  | Up   |
| Lgi4      | 3559.81109 | 0.65006534 | 2.75831694  | 3.4655546  | 1.79308625  | 0.00580998 | 0.13821148 | Up   |
| Lgr5      | 269.289824 | 0.79940709 | 2.44596575  | 3.87802567 | 1.95532235  | 0.01444647 | 0.20345185 | Up   |
| Lhfp12    | 1311.39573 | 0.4458659  | 2.4664617   | 2.14311781 | 1.09971116  | 0.01364553 | 0.19880578 | Up   |
| Lhfp14    | 24.119468  | 1.25273998 | 2.73156845  | 10.7178602 | 3.421945    | 0.00630336 | 0.14333382 | Up   |
| Lhfp15    | 78.2633705 | 1.07128073 | 2.54349168  | 6.61065681 | 2.72479362  | 0.01097507 | 0.18057945 | Up   |
| Lilrb3    | 145.63915  | 0.71827405 | -2.14064861 | 0.3444646  | -1.53757235 | 0.03230239 | 0.29097008 | Down |
| Lilrb3a   | 47.2772983 | 0.53012411 | -2.47045496 | 0.40341937 | -1.30964773 | 0.01349413 | 0.19791392 | Down |
| Lilrb4    | 186.901155 | 0.5536631  | -2.60391827 | 0.36813493 | -1.44169346 | 0.00921647 | 0.16603879 | Down |
| Lilrc2    | 17.3789789 | 0.67191989 | -2.7401033  | 0.27910311 | -1.84112992 | 0.00614199 | 0.14151811 | Down |
| Lin28a    | 8.67585107 | 0.59407147 | 2.18969867  | 2.46371862 | 1.3008375   | 0.0285461  | 0.27266338 | Up   |
| Lingo1    | 285.215984 | 0.44786179 | 2.44395489  | 2.13547057 | 1.09455401  | 0.01452724 | 0.20360887 | Up   |
| Lingo2    | 11.6811561 | 1.34525971 | 2.58663936  | 11.1556425 | 3.4797017   | 0.0096917  | 0.1691887  | Up   |
| Liph      | 51.6810708 | 1.11241287 | -2.70200099 | 0.1245036  | -3.00574068 | 0.00689236 | 0.14774383 | Down |
| Lix1      | 40.5571257 | 0.81757936 | 4.69891743  | 14.3376622 | 3.8417379   | 2.62E-06   | 0.00218651 | Up   |
| Lmo3      | 53.9507211 | 0.57495558 | 3.00989551  | 3.31855741 | 1.73055623  | 0.00261338 | 0.10451122 | Up   |
| Lonrf2    | 1485.18309 | 0.40396917 | 2.51594384  | 2.0228141  | 1.01636374  | 0.01187141 | 0.18725143 | Up   |
| Lpar1     | 1557.31789 | 0.23793781 | 4.255123    | 2.01734053 | 1.01245463  | 2.09E-05   | 0.00815122 | Up   |
| Lrrc4b    | 515.515729 | 0.52166803 | 3.31833509  | 3.3197379  | 1.73106934  | 0.00090556 | 0.06912162 | Up   |
| Lrrc4c    | 381.486829 | 0.75338937 | 2.76164718  | 4.22981815 | 2.08059564  | 0.00575106 | 0.1377285  | Up   |
| Lrrc55    | 158.551522 | 0.83145885 | 2.43891101  | 4.07797845 | 2.02785415  | 0.0147316  | 0.20493494 | Up   |
| Lrriq1    | 6.14169686 | 1.42828111 | 2.25698952  | 9.34124929 | 3.22361551  | 0.02400873 | 0.25364725 | Up   |
| Lrrn2     | 172.418564 | 0.61752636 | 2.80331079  | 3.31985059 | 1.73111831  | 0.00505809 | 0.1309732  | Up   |

|         |            |            |             |            |             |            |            |      |
|---------|------------|------------|-------------|------------|-------------|------------|------------|------|
| Lrrn4   | 148.211682 | 0.76759447 | -2.48752456 | 0.26620137 | -1.90941009 | 0.01286356 | 0.19468329 | Down |
| Lrrtm4  | 260.469879 | 0.54179104 | 2.50920267  | 2.56589749 | 1.35946354  | 0.0121004  | 0.1891454  | Up   |
| Lst1    | 20.6831316 | 0.42675803 | -2.36593632 | 0.4966556  | -1.00968232 | 0.01798454 | 0.22556685 | Down |
| Ltk     | 48.1849165 | 0.67546975 | 4.27761549  | 7.40962162 | 2.88939987  | 1.89E-05   | 0.00808886 | Up   |
| Luzp2   | 45.6508955 | 1.27712369 | 2.48370538  | 9.01294745 | 3.17199898  | 0.01300233 | 0.1952997  | Up   |
| Ly49s6  | 15.7901102 | 0.58462293 | -2.88894754 | 0.31015365 | -1.68894497 | 0.00386534 | 0.11958141 | Down |
| Ly6g6c  | 95.9606529 | 0.89357453 | -2.14277575 | 0.2652216  | -1.91472984 | 0.03213111 | 0.29047053 | Down |
| Ly6g6e  | 90.3242011 | 0.59337991 | 2.21262967  | 2.48445602 | 1.31293     | 0.02692319 | 0.26389527 | Up   |
| Ly6g6f  | 157.88142  | 1.33187559 | -2.26734984 | 0.12329379 | -3.01982792 | 0.02336886 | 0.25107941 | Down |
| Lynx1   | 934.227911 | 1.1649185  | 2.0785875   | 5.35685052 | 2.42138504  | 0.03765528 | 0.31315709 | Up   |
| MAST1   | 223.253616 | 1.09906989 | 2.71927459  | 7.93743474 | 2.98867282  | 0.00654253 | 0.14557744 | Up   |
| Macc1   | 5.99428538 | 0.56501246 | -3.43086221 | 0.26089118 | -1.93847991 | 0.00060167 | 0.05707898 | Down |
| Macrod2 | 41.6231583 | 0.75308725 | 2.20722872  | 3.1650665  | 1.66223581  | 0.02729808 | 0.26595182 | Up   |
| Magel2  | 77.2299475 | 1.08228663 | -2.81405767 | 0.12110942 | -3.04561699 | 0.00489205 | 0.1293445  | Down |
| Map2    | 2091.93311 | 0.5905177  | 3.45511936  | 4.11333661 | 2.04030914  | 0.00055005 | 0.05549807 | Up   |
| Map2k3  | 437.019154 | 0.71041641 | 2.2343707   | 3.00493462 | 1.5873336   | 0.02545869 | 0.25812931 | Up   |
| Mapk10  | 320.996505 | 0.93019776 | 2.50000434  | 5.01238917 | 2.32549843  | 0.01241918 | 0.19142326 | Up   |
| Mapk11  | 221.396423 | 0.48385849 | 2.0701881   | 2.00232767 | 1.00167808  | 0.03843473 | 0.31463868 | Up   |
| Matn3   | 17.2411028 | 0.48750918 | 2.07894092  | 2.01880671 | 1.01350278  | 0.03762278 | 0.3130358  | Up   |
| Mb      | 355.451275 | 1.33202915 | -2.27297123 | 0.12262594 | -3.02766393 | 0.02302791 | 0.2497085  | Down |
| Mboat2  | 521.33512  | 0.57874488 | 3.37378585  | 3.87061092 | 1.95256129  | 0.00074142 | 0.06237718 | Up   |
| Mdga1   | 143.567923 | 0.4596668  | 2.76695698  | 2.41475743 | 1.27187827  | 0.00565822 | 0.1364502  | Up   |
| Megf10  | 327.928775 | 0.69806849 | 2.1173038   | 2.78566748 | 1.47802306  | 0.03423407 | 0.30041322 | Up   |
| Mepce   | 52.1935133 | 0.57485684 | 3.02452787  | 3.33727491 | 1.73867053  | 0.00249022 | 0.10289734 | Up   |
| Mesp2   | 5.42905841 | 1.16428925 | -2.22594277 | 0.16589689 | -2.59164123 | 0.02601802 | 0.2598561  | Down |
| Mfsd14a | 160.16182  | 0.71957276 | 2.50603651  | 3.49011752 | 1.80327562  | 0.0122093  | 0.18968716 | Up   |
| Mgat3   | 760.866718 | 0.48121787 | 2.09022348  | 2.00813031 | 1.00585289  | 0.03659773 | 0.30864324 | Up   |
| Mgat5b  | 14.9226867 | 1.30527086 | 2.56771376  | 10.2075303 | 3.35156194  | 0.01023717 | 0.1737349  | Up   |
| Miip    | 29.1033519 | 0.51867805 | 3.52944126  | 3.55695745 | 1.83064372  | 0.00041644 | 0.04807037 | Up   |
| Mill1   | 5039.94879 | 0.45284885 | 2.39457103  | 2.12046215 | 1.08437873  | 0.01663982 | 0.2183302  | Up   |
| Mlip    | 262.073876 | 0.68188552 | 2.33343273  | 3.01286074 | 1.59113399  | 0.01962545 | 0.23336282 | Up   |
| Mmd2    | 242.889043 | 0.92120679 | 2.46874448  | 4.83737435 | 2.27422419  | 0.0135588  | 0.19836524 | Up   |

|                 |            |            |             |            |             |            |            |      |
|-----------------|------------|------------|-------------|------------|-------------|------------|------------|------|
| Mmp12           | 39.7988405 | 1.39502787 | -4.31195826 | 0.01546015 | -6.01530196 | 1.62E-05   | 0.00750774 | Down |
| Mpl             | 313.522552 | 0.97294848 | -2.58078042 | 0.17543805 | -2.51096638 | 0.00985773 | 0.17072263 | Down |
| Mrap2           | 104.902734 | 0.8793994  | 2.36687471  | 4.23225979 | 2.08142819  | 0.017939   | 0.22556685 | Up   |
| Mreg            | 1512.19902 | 0.81498097 | -2.09880126 | 0.30555774 | -1.71048309 | 0.03583442 | 0.30524461 | Down |
| Mrgprx2         | 4.81608306 | 1.02186704 | -2.33257777 | 0.1916327  | -2.38358435 | 0.01967032 | 0.23341161 | Down |
| Mrpl53          | 61.1454228 | 0.6371174  | -2.09016925 | 0.39730443 | -1.3316832  | 0.0366026  | 0.30864324 | Down |
| Ms4a8           | 10.9390766 | 0.55577603 | -2.50330659 | 0.381227   | -1.39127779 | 0.01230389 | 0.19065058 | Down |
| Msh4            | 15.1470151 | 0.91363018 | -2.31745462 | 0.23047841 | -2.11729649 | 0.02047898 | 0.23668794 | Down |
| Msln            | 115.522774 | 1.09016276 | -4.15713392 | 0.04322613 | -4.53195259 | 3.22E-05   | 0.01136558 | Down |
| Mt3             | 80.5747055 | 0.94132548 | 2.45173042  | 4.95153662 | 2.30787631  | 0.01421711 | 0.20211141 | Up   |
| Mtfp1           | 276.087034 | 0.83955637 | -2.07476721 | 0.29897898 | -1.74188402 | 0.03800811 | 0.31397173 | Down |
| Muc16           | 201.070984 | 1.39991652 | -4.0223326  | 0.02018    | -5.63092986 | 5.76E-05   | 0.01686096 | Down |
| Muc20           | 128.92984  | 1.12702804 | -2.94280518 | 0.10036833 | -3.31662397 | 0.00325253 | 0.11397489 | Down |
| Muc5b           | 1.7179433  | 1.25162911 | 1.96127885  | 5.48234721 | 2.4547937   | 0.0498465  | 0.35032234 | Up   |
| Mybpc2          | 2640.73668 | 0.64558585 | -2.49437901 | 0.32752211 | -1.61033579 | 0.01261777 | 0.19290113 | Down |
| Myh4            | 265.537629 | 1.56834258 | 4.41928529  | 122.018263 | 6.93095329  | 9.90E-06   | 0.00616542 | Up   |
| Myh6            | 266.767429 | 0.66118435 | 3.079552    | 4.10149991 | 2.0361516   | 0.00207312 | 0.09744337 | Up   |
| Myh7            | 49.9156805 | 0.80670198 | 2.65724763  | 4.41865385 | 2.14360692  | 0.00787816 | 0.15610484 | Up   |
| Mylk4           | 8.38502626 | 0.75371912 | -2.40039552 | 0.28534437 | -1.80922401 | 0.01637737 | 0.21667611 | Down |
| Myo16           | 32.1263732 | 0.57447408 | 4.22116357  | 5.37010032 | 2.42494904  | 2.43E-05   | 0.00927585 | Up   |
| Myo19           | 1610.74765 | 0.47342101 | -2.22528041 | 0.48179973 | -1.0534945  | 0.02606242 | 0.25997264 | Down |
| Myo3a           | 23.0670541 | 0.74416637 | 2.87036709  | 4.39551027 | 2.13603066  | 0.00409996 | 0.12241295 | Up   |
| Myoc            | 545.434053 | 0.47143458 | 4.9054275   | 4.96773476 | 2.31258815  | 9.32E-07   | 0.00125896 | Up   |
| Myom2           | 41.8953816 | 0.49021583 | 2.32971068  | 2.20696087 | 1.14206105  | 0.01982145 | 0.23375308 | Up   |
| Myt1            | 46.3909043 | 1.59148793 | 2.00377537  | 9.11968708 | 3.18898432  | 0.04509413 | 0.33645241 | Up   |
| NEWGENE_1306455 | 782.078734 | 0.32148249 | 3.7698689   | 2.31650025 | 1.21194684  | 0.00016333 | 0.03158787 | Up   |
| NEWGENE_1308196 | 32.1685075 | 0.94269686 | 2.82723428  | 6.3432617  | 2.66522486  | 0.0046952  | 0.12835359 | Up   |
| NEWGENE_1310847 | 7.98321584 | 0.7249743  | -2.08009914 | 0.35159381 | -1.50801841 | 0.03751644 | 0.31284146 | Down |
| Naglt1          | 2.34619705 | 1.18807066 | 2.10288861  | 5.65050675 | 2.49838026  | 0.03547551 | 0.30415895 | Up   |
| Nap115          | 629.248491 | 0.59728532 | 2.57930601  | 2.90911757 | 1.54058161  | 0.0098999  | 0.17106567 | Up   |
| Napb            | 1205.83366 | 0.51408454 | 2.82400849  | 2.73545173 | 1.4517791   | 0.00474271 | 0.12835359 | Up   |
| Nat8f3          | 467.907578 | 0.37310688 | 3.19846101  | 2.28685961 | 1.1933678   | 0.00138163 | 0.08235285 | Up   |

|        |            |            |             |            |             |            |            |      |
|--------|------------|------------|-------------|------------|-------------|------------|------------|------|
| Nat8f5 | 29.8142576 | 0.55491081 | 2.44111463  | 2.55726364 | 1.3546009   | 0.01464201 | 0.20429358 | Up   |
| Natd1  | 52.7914753 | 0.37215163 | 3.40949403  | 2.40969201 | 1.26884877  | 0.00065084 | 0.05951481 | Up   |
| Ncam2  | 273.533873 | 0.75105848 | 2.52087911  | 3.71491099 | 1.89332764  | 0.01170621 | 0.18598964 | Up   |
| Nckap5 | 120.827169 | 0.57450726 | 2.00701863  | 2.2238304  | 1.15304677  | 0.04474768 | 0.33535353 | Up   |
| Ncr1   | 12.0803147 | 0.43449289 | -2.51930479 | 0.46825944 | -1.09462003 | 0.01175868 | 0.18598964 | Down |
| Ndrg4  | 3586.49393 | 0.57320304 | 2.9591713   | 3.2404765  | 1.69620597  | 0.00308468 | 0.11220917 | Up   |
| Necab2 | 50.8653154 | 0.50872522 | 1.96624284  | 2.00038447 | 1.00027731  | 0.04927057 | 0.34887938 | Up   |
| Nefh   | 294.575747 | 0.7223492  | 2.44913736  | 3.40848922 | 1.76913242  | 0.01431988 | 0.2027956  | Up   |
| Nefl   | 1156.36619 | 1.53443758 | 2.15372125  | 9.88164232 | 3.30475084  | 0.03126204 | 0.28481388 | Up   |
| Nefm   | 465.306027 | 1.35268127 | 2.19378469  | 7.82175021 | 2.96749146  | 0.02825089 | 0.27070894 | Up   |
| Negr1  | 106.346583 | 0.36227517 | 2.88974962  | 2.06606341 | 1.04688453  | 0.00385549 | 0.11958141 | Up   |
| Nell1  | 20.3725811 | 0.79018557 | 2.37329025  | 3.66887996 | 1.8753397   | 0.0176304  | 0.22369006 | Up   |
| Nell2  | 35.8261423 | 0.71393978 | 2.20354458  | 2.97563615 | 1.57319813  | 0.02755639 | 0.26728174 | Up   |
| Neto1  | 31.54494   | 0.67705444 | 2.53175745  | 3.28100462 | 1.71413763  | 0.01134925 | 0.18313178 | Up   |
| Neurl1 | 184.144521 | 0.84968709 | 2.13864719  | 3.52391934 | 1.8171809   | 0.03246425 | 0.29170331 | Up   |
| Nfasc  | 997.089938 | 0.4522684  | 2.55673719  | 2.2288993  | 1.15633144  | 0.0105659  | 0.17582461 | Up   |
| Nfe2   | 361.525681 | 0.80643617 | -2.65403739 | 0.22683077 | -2.14031174 | 0.0079535  | 0.15640298 | Down |
| Nfil3  | 1127.901   | 0.38669042 | -3.05869903 | 0.44050503 | -1.18276961 | 0.002223   | 0.10092309 | Down |
| Ngb    | 460.458558 | 1.11555209 | 2.72738925  | 8.23943135 | 3.04254477  | 0.00638377 | 0.14349992 | Up   |
| Ngfr   | 1329.9739  | 0.75590888 | 3.17287404  | 5.27219471 | 2.39840365  | 0.00150938 | 0.08520474 | Up   |
| Nhp2   | 34.5547311 | 0.76048663 | 3.01168334  | 4.89173042 | 2.2903449   | 0.00259803 | 0.1043424  | Up   |
| Nme5   | 20.8299501 | 0.35402261 | 3.10987133  | 2.14498084 | 1.10096476  | 0.00187169 | 0.09410949 | Up   |
| Nmnat2 | 330.855738 | 0.68821769 | 2.90034663  | 3.98911819 | 1.99606987  | 0.0037275  | 0.11876593 | Up   |
| Noct   | 770.5777   | 0.42862534 | -2.92658392 | 0.41916553 | -1.25440802 | 0.00342707 | 0.11765336 | Down |
| Nol4   | 2.50754704 | 1.50585592 | 2.36519723  | 11.8076197 | 3.56164626  | 0.01802047 | 0.22575015 | Up   |
| Notum  | 8.70250977 | 0.76436812 | -2.39218017 | 0.28155599 | -1.82850627 | 0.01674862 | 0.218623   | Down |
| Npas2  | 761.719868 | 0.16286964 | -9.10550729 | 0.35774147 | -1.48301071 | 8.59E-20   | 1.51E-15   | Down |
| Npas4  | 375.69605  | 0.64153292 | -2.10061909 | 0.39294075 | -1.34761629 | 0.03567442 | 0.30500663 | Down |
| Npffr1 | 10.6987353 | 0.78942498 | 2.04585642  | 3.06322251 | 1.61505017  | 0.0407705  | 0.32276175 | Up   |
| Npr3   | 2617.05964 | 0.78995705 | -2.04754501 | 0.3259059  | -1.61747262 | 0.0406046  | 0.32241266 | Down |
| Npy2r  | 17.4297048 | 1.30287864 | 2.2302496   | 7.49404467 | 2.90574458  | 0.02573088 | 0.2586687  | Up   |
| Npy4r  | 83.2525348 | 1.69914935 | 1.98933017  | 10.4119549 | 3.38016907  | 0.04666477 | 0.34029854 | Up   |

|         |            |            |             |            |             |            |            |      |
|---------|------------|------------|-------------|------------|-------------|------------|------------|------|
| Nr0b2   | 80.4967477 | 1.27389622 | -2.59234427 | 0.10136436 | -3.30237756 | 0.00953243 | 0.16857431 | Down |
| Nr1h5   | 6.23627217 | 1.22929772 | 3.21542402  | 15.4840763 | 3.95271341  | 0.00130252 | 0.08005501 | Up   |
| Nr4a3   | 2986.62323 | 0.53082272 | -2.34222377 | 0.42240371 | -1.2433056  | 0.01916922 | 0.23113653 | Down |
| Nrcam   | 655.733276 | 0.88888444 | 2.27842545  | 4.07064367 | 2.02525694  | 0.02270124 | 0.24785012 | Up   |
| Nrgn    | 697.65064  | 0.86004711 | -2.6261937  | 0.20896738 | -2.25865031 | 0.00863457 | 0.16278867 | Down |
| Nrip3   | 616.106223 | 0.60060026 | 2.73100254  | 3.11717863 | 1.64024083  | 0.0063142  | 0.14333382 | Up   |
| Nrn1    | 270.22052  | 0.53763618 | 3.05364832  | 3.12044509 | 1.64175182  | 0.00226077 | 0.10150912 | Up   |
| Nrsn2   | 27.291082  | 0.98305811 | 2.82777841  | 6.8679069  | 2.77987048  | 0.00468722 | 0.12835359 | Up   |
| Nsg1    | 1049.15302 | 0.44876657 | 3.25495563  | 2.75244791 | 1.46071526  | 0.0011341  | 0.07513311 | Up   |
| Nsg2    | 1058.70025 | 1.19680917 | 2.02560429  | 5.36754282 | 2.42426179  | 0.04280535 | 0.33056156 | Up   |
| Nsun4   | 27.8386151 | 0.61158291 | 2.41441926  | 2.78295498 | 1.47661757  | 0.01576032 | 0.21218412 | Up   |
| Nt5c1a  | 527.445787 | 0.52421237 | 2.49126648  | 2.47246949 | 1.30595272  | 0.01272886 | 0.19331132 | Up   |
| Ntng1   | 147.375049 | 0.58887668 | 2.30297725  | 2.56004573 | 1.35616958  | 0.02128012 | 0.24103124 | Up   |
| Ntrk1   | 1128.01068 | 1.38693028 | 2.18547429  | 8.17432985 | 3.03110046  | 0.02885409 | 0.27381751 | Up   |
| Nudt7   | 375.612812 | 0.46512943 | -2.48251346 | 0.44916267 | -1.15469006 | 0.01304591 | 0.19533205 | Down |
| Nup62cl | 14.4314787 | 1.14123716 | -2.91554275 | 0.09962656 | -3.32732571 | 0.0035507  | 0.11765336 | Down |
| Nxph4   | 24.6113111 | 0.86003331 | 4.25840319  | 12.6614312 | 3.66236859  | 2.06E-05   | 0.00815122 | Up   |
| Obscn   | 428.600723 | 0.58407463 | -2.02898282 | 0.43980095 | -1.18507738 | 0.04246004 | 0.32965165 | Down |
| Ogdhl   | 121.772827 | 0.40089744 | 3.52613629  | 2.66404605 | 1.41361902  | 0.00042167 | 0.04807037 | Up   |
| Olfm1   | 908.318832 | 0.40067383 | 3.31993551  | 2.51439497 | 1.33021129  | 0.00090038 | 0.0690267  | Up   |
| Olr1    | 244.823137 | 0.5830494  | -2.35554326 | 0.38598105 | -1.37339808 | 0.01849564 | 0.22813138 | Down |
| Olr1595 | 3.01859232 | 1.14671579 | -2.16366658 | 0.17910647 | -2.48111063 | 0.03048995 | 0.28128299 | Down |
| Olr1666 | 2.15708847 | 1.38981521 | 2.00712195  | 6.91403834 | 2.7895286   | 0.04473668 | 0.33535353 | Up   |
| Olr837  | 4.94792978 | 0.67500959 | 1.99625068  | 2.54468725 | 1.34748836  | 0.04590664 | 0.3388898  | Up   |
| Oospl   | 8.89522003 | 0.69390011 | -2.86501844 | 0.25208172 | -1.9880366  | 0.00416985 | 0.12303509 | Down |
| Oprl1   | 113.500854 | 1.2889944  | 2.55063902  | 9.76594339 | 3.28775941  | 0.01075256 | 0.17794937 | Up   |
| Oscar   | 43.3543328 | 0.79365309 | -2.62953825 | 0.23537922 | -2.08694115 | 0.00855009 | 0.16220237 | Down |
| Otof    | 10.4360184 | 0.78635961 | 3.07140194  | 5.33403188 | 2.41522645  | 0.00213056 | 0.09896636 | Up   |
| Otop1   | 1499.16192 | 1.11482524 | -1.97326875 | 0.2176603  | -2.19984982 | 0.04846495 | 0.34629658 | Down |
| Otud7a  | 93.8783976 | 0.57803921 | 2.71993569  | 2.97363894 | 1.57222949  | 0.00652946 | 0.1454711  | Up   |
| Oxtr    | 767.705819 | 0.58140038 | 4.33734802  | 5.74272624 | 2.52173579  | 1.44E-05   | 0.00714842 | Up   |
| P2rx2   | 119.345375 | 0.58445205 | 3.55442776  | 4.2204376  | 2.0773926   | 0.0003788  | 0.04667955 | Up   |

|          |            |            |             |            |             |            |            |      |
|----------|------------|------------|-------------|------------|-------------|------------|------------|------|
| P2rx6    | 23.0730991 | 0.73912543 | 3.05431467  | 4.78169343 | 2.25752164  | 0.00225575 | 0.10150912 | Up   |
| Pacrg    | 181.679817 | 1.35385534 | -2.18633795 | 0.12851554 | -2.95998531 | 0.02879089 | 0.27373298 | Down |
| Pacsin1  | 65.0284651 | 0.86328376 | 2.11861582  | 3.55282501 | 1.82896663  | 0.03412295 | 0.30041322 | Up   |
| Pak6     | 20.7005409 | 0.84428215 | 2.2372647   | 3.70348281 | 1.88888264  | 0.02526904 | 0.25762099 | Up   |
| Pak7     | 8.16662713 | 0.96814866 | 2.56243676  | 5.58214544 | 2.48081971  | 0.01039405 | 0.17464966 | Up   |
| Pank1    | 4919.45636 | 0.57992825 | -2.71538793 | 0.33570591 | -1.57473016 | 0.00661982 | 0.1458793  | Down |
| Panx2    | 60.0549667 | 0.68876593 | 2.60201518  | 3.4633769  | 1.7921794   | 0.00926777 | 0.16636509 | Up   |
| Paqr5    | 64.9219839 | 0.65968443 | 2.53264253  | 3.18378923 | 1.67074483  | 0.01132063 | 0.18304414 | Up   |
| Pax8     | 6.50760084 | 0.75490997 | -2.03447543 | 0.34487709 | -1.53584578 | 0.04190368 | 0.32798086 | Down |
| Pcbp3    | 584.525245 | 0.51466332 | 2.74538771  | 2.66281159 | 1.41295035  | 0.00604394 | 0.14065779 | Up   |
| Pcdh10   | 465.081278 | 0.8340128  | 3.13156378  | 6.1125073  | 2.61176428  | 0.00173878 | 0.09024092 | Up   |
| Pcdh17   | 1232.88953 | 0.54689648 | 2.27684213  | 2.37050912 | 1.24519695  | 0.02279565 | 0.24857175 | Up   |
| Pclo     | 393.399465 | 0.86247299 | 3.13536614  | 6.51682206 | 2.7041686   | 0.0017164  | 0.08968176 | Up   |
| Pcnx2    | 82.0911019 | 0.98714556 | 2.91436664  | 7.34572101 | 2.8769041   | 0.00356411 | 0.11765336 | Up   |
| Pcp4     | 88.2572549 | 0.7751856  | 4.33375983  | 10.2636232 | 3.3594682   | 1.47E-05   | 0.00714842 | Up   |
| Perm1    | 645.885132 | 0.67344718 | -3.20059553 | 0.22446586 | -2.15543203 | 0.00137144 | 0.082174   | Down |
| Pex51    | 84.9810421 | 0.61816267 | 3.17826575  | 3.90327534 | 1.96468523  | 0.00148159 | 0.08472565 | Up   |
| Pf4      | 2650.99349 | 1.02242931 | -2.44625747 | 0.17663886 | -2.50112533 | 0.01443479 | 0.20345185 | Down |
| Pgbd5    | 103.685998 | 1.12414466 | 2.60767226  | 7.62850763 | 2.93140085  | 0.00911602 | 0.1654102  | Up   |
| Phactr3  | 56.3905625 | 1.14652993 | 2.25797751  | 6.01614274 | 2.5888388   | 0.02394706 | 0.25326182 | Up   |
| Phf24    | 368.402565 | 0.71738767 | 2.48174961  | 3.43515825 | 1.78037656  | 0.01307391 | 0.19534092 | Up   |
| Phospho1 | 1763.19059 | 0.69996952 | -2.38423444 | 0.31449491 | -1.66889142 | 0.0171147  | 0.22134498 | Down |
| Phox2a   | 99.7826651 | 1.34787996 | 2.44047474  | 9.77750923 | 3.28946699  | 0.01466797 | 0.20437374 | Up   |
| Phox2b   | 232.14701  | 1.4934469  | 2.02019702  | 8.09514539 | 3.01705699  | 0.04336295 | 0.33322536 | Up   |
| Pigz     | 3.6742138  | 1.29259977 | 2.54074316  | 9.74163567 | 3.28416403  | 0.01106171 | 0.18115622 | Up   |
| Pih1d2   | 935.212288 | 0.49914761 | -2.00676276 | 0.49942127 | -1.00167083 | 0.04477493 | 0.33535353 | Down |
| Pirt     | 1006.69234 | 1.28307308 | 2.21149054  | 7.14782341 | 2.83750399  | 0.02700189 | 0.26423919 | Up   |
| Pkd2l1   | 22.6849883 | 0.69574801 | -2.24486438 | 0.33871413 | -1.56185992 | 0.02477684 | 0.25584526 | Down |
| Pkdrej   | 220.935504 | 0.72305394 | -2.35849357 | 0.30665363 | -1.70531808 | 0.01834928 | 0.22733939 | Down |
| Pla2g2f  | 4.22414069 | 0.63326135 | -1.98835229 | 0.41779101 | -1.25914666 | 0.04677274 | 0.34031564 | Down |
| Pla2g3   | 45.5409572 | 1.00785413 | 3.67348874  | 13.0171417 | 3.70234079  | 0.00023926 | 0.03818609 | Up   |
| Plch2    | 75.6459985 | 0.74525529 | 2.48505115  | 3.60999668 | 1.85199751  | 0.01295328 | 0.1952997  | Up   |

|          |            |            |             |            |             |            |            |      |
|----------|------------|------------|-------------|------------|-------------|------------|------------|------|
| Plcx2    | 127.292075 | 0.97722328 | 2.66573595  | 6.08399613 | 2.60501923  | 0.007682   | 0.15537465 | Up   |
| Plek     | 443.54726  | 0.75312851 | -2.61416797 | 0.25546465 | -1.96880443 | 0.00894451 | 0.16512064 | Down |
| Plekhd1  | 1713.39602 | 0.4250681  | 3.34907445  | 2.68251219 | 1.42358473  | 0.00081082 | 0.06507285 | Up   |
| Plekhd1  | 22.6690272 | 0.74283078 | 2.26687416  | 3.21296199 | 1.68390391  | 0.02339791 | 0.25123778 | Up   |
| Pllp     | 781.841554 | 0.70211851 | -2.13770232 | 0.35332791 | -1.50092037 | 0.03254091 | 0.29170331 | Down |
| Plpp4    | 33.9601303 | 0.63679647 | 1.97156578  | 2.38747584 | 1.25548614  | 0.0486592  | 0.34691312 | Up   |
| Plppr4   | 77.052194  | 0.67384406 | 2.06185086  | 2.61963526 | 1.38936595  | 0.03922194 | 0.31677516 | Up   |
| Plppr5   | 209.165368 | 0.88437821 | 2.47428103  | 4.55736598 | 2.18820023  | 0.01335046 | 0.19679323 | Up   |
| Plxnb3   | 803.783428 | 0.71348448 | 3.12837206  | 4.69799416 | 2.23204492  | 0.00175778 | 0.09049707 | Up   |
| Pmp2     | 7.42820306 | 1.49343546 | 2.84455134  | 19.0029808 | 4.24815383  | 0.0044474  | 0.12654552 | Up   |
| Pnlipr1  | 6.91524845 | 0.76955238 | -3.71198356 | 0.1380664  | -2.85656578 | 0.00020564 | 0.03632799 | Down |
| Pnma2    | 115.441654 | 0.93441797 | 2.994256    | 6.95420997 | 2.79788663  | 0.00275115 | 0.10619684 | Up   |
| Pnma3    | 18.962067  | 1.51305956 | 2.15119551  | 9.54593776 | 3.25488693  | 0.03146077 | 0.28588266 | Up   |
| Pnma11   | 26.5730481 | 1.05520572 | 3.11701701  | 9.77498295 | 3.28909419  | 0.00182691 | 0.09323615 | Up   |
| Pnma12   | 188.63208  | 0.89731319 | 2.76729347  | 5.59108758 | 2.48312894  | 0.00565238 | 0.1364502  | Up   |
| Pnpla5   | 6.68375586 | 1.27840096 | -2.19296148 | 0.14324095 | -2.80348406 | 0.02831015 | 0.27085181 | Down |
| Polr21   | 61.264963  | 0.65576294 | 3.28585836  | 4.45289669 | 2.15474414  | 0.00101672 | 0.07344452 | Up   |
| Popdc3   | 58.8218712 | 0.99807471 | -2.2303749  | 0.21373857 | -2.22608079 | 0.02572256 | 0.2586687  | Down |
| Pou2f2   | 45.4727115 | 0.51568012 | -2.19732467 | 0.45592972 | -1.13311665 | 0.02799727 | 0.26917854 | Down |
| Ppara    | 11913.8359 | 0.72623961 | -2.24471225 | 0.32304366 | -1.63019895 | 0.02478661 | 0.25584526 | Down |
| Ppargc1b | 2444.74868 | 0.48249396 | -2.33426812 | 0.4580985  | -1.12627026 | 0.01958169 | 0.23336282 | Down |
| Ppbb     | 99.5899069 | 1.13077837 | -3.09477557 | 0.08841866 | -3.49950529 | 0.00196962 | 0.09602565 | Down |
| Ppfia2   | 113.860554 | 0.6593121  | 2.16412459  | 2.68855973 | 1.42683352  | 0.03045479 | 0.28128299 | Up   |
| Ppfia3   | 157.581294 | 0.62469494 | 3.50258007  | 4.55687261 | 2.18804404  | 0.00046078 | 0.05024454 | Up   |
| Ppif     | 825.683211 | 0.46931976 | -3.21106666 | 0.35183794 | -1.50701705 | 0.00132243 | 0.08005733 | Down |
| Ppp1r1b  | 50.6939855 | 0.97205307 | 2.6846491   | 6.10343486 | 2.60962138  | 0.0072606  | 0.15052566 | Up   |
| Ppp1r1c  | 15.0022119 | 0.70678131 | 2.34726412  | 3.15798081 | 1.65900241  | 0.01891184 | 0.2302349  | Up   |
| Ppp1r35  | 9.32041628 | 0.74474864 | 1.98220353  | 2.78223327 | 1.47624338  | 0.04745647 | 0.34271728 | Up   |
| Ppp1r3g  | 117.312848 | 0.75615788 | -1.97424538 | 0.35531212 | -1.49284121 | 0.04835385 | 0.34578418 | Down |
| Ppp2r2b  | 373.406591 | 0.78607121 | 2.76728257  | 4.51673775 | 2.17528115  | 0.00565257 | 0.1364502  | Up   |
| Prkar1b  | 632.097476 | 0.87375686 | 2.78975966  | 5.41729122 | 2.43757165  | 0.00527472 | 0.13324165 | Up   |
| Prkg2    | 127.843333 | 0.7982881  | 2.77897027  | 4.65383125 | 2.2184189   | 0.00545315 | 0.13521968 | Up   |

|            |            |            |             |            |             |            |            |      |
|------------|------------|------------|-------------|------------|-------------|------------|------------|------|
| Prom2      | 199.273944 | 0.80559519 | -3.08405203 | 0.1786865  | -2.48449747 | 0.00204202 | 0.09738633 | Down |
| Prph       | 2474.82394 | 1.06666866 | 2.69938477  | 7.35818078 | 2.87934912  | 0.00694678 | 0.14818674 | Up   |
| Prr15      | 633.769906 | 0.48394378 | -2.18832731 | 0.47995552 | -1.05902738 | 0.02864577 | 0.27293221 | Down |
| Prr18      | 153.803351 | 0.67316002 | 2.79593559  | 3.68614307 | 1.88211207  | 0.00517497 | 0.13166927 | Up   |
| Ptchd1     | 113.186086 | 0.55825214 | 2.06344787  | 2.22210068 | 1.15192419  | 0.0390701  | 0.31638127 | Up   |
| Ptchd4     | 2.5795621  | 1.30692547 | 2.34599401  | 8.37471044 | 3.06603931  | 0.01897641 | 0.2302349  | Up   |
| Ptgs2      | 12372.3078 | 0.5708901  | -2.46511417 | 0.37701419 | -1.40730927 | 0.01369696 | 0.19905946 | Down |
| Ptk7       | 279.383502 | 0.22790499 | 4.8417589   | 2.14869542 | 1.10346099  | 1.29E-06   | 0.0013204  | Up   |
| Ptn        | 439.869793 | 0.49435257 | 2.71156952  | 2.53234041 | 1.34047135  | 0.00669655 | 0.14589419 | Up   |
| Ptpn       | 800.961235 | 0.76828367 | 2.97242765  | 4.86914219 | 2.28366763  | 0.00295455 | 0.11078927 | Up   |
| Ptpn2      | 716.41661  | 0.83035914 | 2.90265209  | 5.31564109 | 2.4102437   | 0.00370017 | 0.1183247  | Up   |
| Ptprt      | 811.606982 | 0.68111365 | 2.02561417  | 2.60209467 | 1.37967345  | 0.04280434 | 0.33056156 | Up   |
| Ptprz1     | 548.75864  | 0.70995287 | 2.22674177  | 2.99152622 | 1.58088171  | 0.02596454 | 0.25958623 | Up   |
| Ptx4       | 6.6488474  | 0.51527274 | -2.228251   | 0.45120126 | -1.148157   | 0.02586378 | 0.25887375 | Down |
| Pvalb      | 8.83263957 | 2.50187649 | 1.9957828   | 31.8495717 | 4.99320207  | 0.04595757 | 0.3388898  | Up   |
| RGD1305733 | 250.058904 | 1.48248194 | 2.01884061  | 7.96069696 | 2.99289474  | 0.04350379 | 0.33322536 | Up   |
| RGD1307443 | 233.545585 | 1.30588278 | 1.96187798  | 5.90518667 | 2.56198266  | 0.04977669 | 0.35029097 | Up   |
| RGD1309108 | 2.05410106 | 1.80772136 | 2.11298353  | 14.1201691 | 3.81968546  | 0.03460218 | 0.30124966 | Up   |
| RGD1310166 | 2.84411496 | 1.11316793 | 2.56703248  | 7.24777536 | 2.85753824  | 0.0102573  | 0.1737349  | Up   |
| RGD1312005 | 113.552666 | 1.03796985 | 2.2632917   | 5.09551702 | 2.34922854  | 0.02361771 | 0.25203534 | Up   |
| RGD1559441 | 22.244228  | 1.30460706 | 2.37798345  | 8.58807024 | 3.10233399  | 0.01740761 | 0.22259186 | Up   |
| RGD1560556 | 74.7159636 | 0.36532133 | -2.82360696 | 0.48919317 | -1.03152385 | 0.00474866 | 0.12835359 | Down |
| RGD1561143 | 9.62981684 | 0.64327829 | -2.01356175 | 0.40745692 | -1.29528056 | 0.04405557 | 0.33496951 | Down |
| RGD1561777 | 114.391289 | 0.44546502 | -2.4891151  | 0.46367515 | -1.1088137  | 0.01280615 | 0.1941492  | Down |
| RGD1561931 | 155.155256 | 0.45165749 | 2.26617335  | 2.03289284 | 1.02353417  | 0.02344077 | 0.25139046 | Up   |
| RGD1562625 | 35.67319   | 0.84870792 | -2.04928594 | 0.29952634 | -1.73924522 | 0.04043416 | 0.32164121 | Down |
| RGD1562660 | 39.7858688 | 0.62464018 | 2.60911242  | 3.09460752 | 1.62975645  | 0.00907774 | 0.16516558 | Up   |
| RGD1562667 | 11.3955    | 0.48465981 | -2.1850018  | 0.47997043 | -1.05898257 | 0.02888871 | 0.27385004 | Down |
| RGD1563349 | 140.360309 | 0.61529896 | 2.20782617  | 2.56413664 | 1.35847314  | 0.02725639 | 0.26569308 | Up   |
| RGD1563861 | 48.5302757 | 0.33397499 | 3.28182057  | 2.13768015 | 1.096046    | 0.00103139 | 0.07373647 | Up   |
| RGD1564053 | 15.4105009 | 0.97345752 | 3.53221526  | 10.8412672 | 3.4384615   | 0.00041209 | 0.04805342 | Up   |
| RGD1564129 | 35.9977335 | 1.22282155 | -2.42494697 | 0.12804498 | -2.96527741 | 0.01531062 | 0.20966716 | Down |



|            |            |            |             |            |             |            |            |      |
|------------|------------|------------|-------------|------------|-------------|------------|------------|------|
| RGD1564409 | 1.97373303 | 1.76784933 | 2.11789437  | 13.3996011 | 3.74411815  | 0.03418401 | 0.30041322 | Up   |
| RGD1564463 | 11.336261  | 0.94188226 | 3.30756247  | 8.66580882 | 3.11533441  | 0.00094112 | 0.07027322 | Up   |
| RGD1565356 | 184.148665 | 0.52675185 | -2.44895017 | 0.40895414 | -1.28998903 | 0.01432733 | 0.2027956  | Down |
| RGD1566029 | 424.931051 | 0.59627133 | 2.06654236  | 2.3492821  | 1.23221996  | 0.0387773  | 0.31497635 | Up   |
| RGD1566251 | 62.4480968 | 1.15928005 | 2.43607239  | 7.08167245 | 2.82409012  | 0.01484771 | 0.20589767 | Up   |
| Rab11fip4  | 483.443387 | 0.56235898 | 2.63051872  | 2.78812613 | 1.47929583  | 0.00852547 | 0.16215938 | Up   |
| Rab15      | 389.386721 | 0.91756226 | 2.05887526  | 3.70415952 | 1.88914623  | 0.03950619 | 0.31807643 | Up   |
| Rab25      | 9.12374024 | 0.43907439 | -2.57214652 | 0.4571173  | -1.12936368 | 0.01010701 | 0.1727663  | Down |
| Rab33a     | 30.8181479 | 0.56641601 | 2.17962115  | 2.35311578 | 1.23457231  | 0.02928556 | 0.27572109 | Up   |
| Rab37      | 128.771167 | 1.09699403 | -2.01122128 | 0.21668967 | -2.20629772 | 0.04430209 | 0.33535353 | Down |
| Rab39a     | 35.3462919 | 0.76607023 | 2.33498085  | 3.45517627 | 1.78875931  | 0.01954442 | 0.23336282 | Up   |
| Rab3b      | 284.933441 | 1.33520883 | 2.15196516  | 7.32750927 | 2.87332289  | 0.0314001  | 0.28547909 | Up   |
| Rab3c      | 134.689665 | 1.43074847 | 2.46273878  | 11.4999824 | 3.52355974  | 0.01378803 | 0.19988662 | Up   |
| Rab6b      | 2111.16992 | 0.65442765 | 3.10831931  | 4.09587053 | 2.03417011  | 0.00188155 | 0.09410949 | Up   |
| Rab9b      | 122.546097 | 0.79881424 | 2.99936801  | 5.26319148 | 2.39593788  | 0.0027054  | 0.10578186 | Up   |
| Raly1      | 28.0442679 | 1.31125682 | 3.25579474  | 19.2820036 | 4.26918307  | 0.00113075 | 0.07513311 | Up   |
| Rasal1     | 75.8527703 | 0.45736829 | 2.23736694  | 2.03256387 | 1.02330069  | 0.02526237 | 0.25762099 | Up   |
| Rasef      | 71.0835761 | 0.44442763 | 3.03482972  | 2.54693505 | 1.34876217  | 0.00240672 | 0.10258232 | Up   |
| Rasgef1c   | 233.464188 | 0.69191794 | 2.61207218  | 3.49996286 | 1.80733961  | 0.00899953 | 0.16516558 | Up   |
| Rassf4     | 1744.23829 | 0.4217798  | 2.59220158  | 2.13367177 | 1.09333826  | 0.00953639 | 0.16857431 | Up   |
| Rbfox1     | 263.574297 | 0.68275882 | 2.51429684  | 3.28674233 | 1.71665836  | 0.011927   | 0.18762581 | Up   |
| Rbm11      | 62.2148611 | 1.19414194 | 2.41153549  | 7.36005057 | 2.87971568  | 0.01588551 | 0.21321555 | Up   |
| Reep1      | 1060.28216 | 0.7261347  | 3.01443574  | 4.55953402 | 2.18888639  | 0.00257458 | 0.10390639 | Up   |
| Reln       | 4216.25917 | 0.36649533 | 3.38693679  | 2.36410892 | 1.24129651  | 0.00070678 | 0.06196886 | Up   |
| Rem2       | 7.54007946 | 0.62262049 | 2.03533106  | 2.40700447 | 1.26723882  | 0.04181757 | 0.32779699 | Up   |
| Rgs17      | 370.138505 | 0.91510586 | 2.59340415  | 5.18103138 | 2.37323932  | 0.0095031  | 0.16857431 | Up   |
| Rgs18      | 998.872762 | 0.82679997 | -2.79680985 | 0.20132492 | -2.3124023  | 0.00516099 | 0.13150412 | Down |
| Rgs20      | 36.2633595 | 0.70252737 | 2.77028315  | 3.85358104 | 1.94619973  | 0.00560076 | 0.1359239  | Up   |
| Rgs9       | 121.808864 | 1.44177403 | 2.28026833  | 9.76507852 | 3.28763165  | 0.02259178 | 0.24735221 | Up   |
| Rhag       | 89.3808478 | 1.19610312 | -2.06099024 | 0.18109808 | -2.46515685 | 0.03930397 | 0.31695936 | Down |
| Rhpn1      | 98.8223975 | 0.64638119 | 2.38892741  | 2.91633762 | 1.54415775  | 0.01689764 | 0.21990732 | Up   |
| Rimbp2     | 478.107482 | 0.5954912  | 1.99516026  | 2.27852528 | 1.18810037  | 0.0460254  | 0.3388898  | Up   |

|         |            |            |             |            |             |            |            |      |
|---------|------------|------------|-------------|------------|-------------|------------|------------|------|
| Rims3   | 75.7305485 | 1.30726799 | 2.05191213  | 6.41922462 | 2.68239904  | 0.0401782  | 0.32080195 | Up   |
| Ripply1 | 3.26098896 | 0.92867258 | -2.02583024 | 0.2714328  | -1.88133301 | 0.04278218 | 0.33056156 | Down |
| Rnase6  | 19.8545714 | 0.52566403 | -2.62366873 | 0.38444036 | -1.37916828 | 0.00869883 | 0.16285744 | Down |
| Rnfl12  | 62.759001  | 0.8128712  | 2.19864306  | 3.45147638 | 1.78721361  | 0.02790331 | 0.26886419 | Up   |
| Rnfl52  | 1095.88241 | 0.54402956 | -2.00748031 | 0.46906878 | -1.09212863 | 0.04469854 | 0.33535353 | Down |
| Rnfl57  | 483.21096  | 0.58176253 | 2.8025437   | 3.09602028 | 1.63041492  | 0.00507013 | 0.13104878 | Up   |
| Rnfl65  | 10.8952133 | 1.1795717  | 3.00914362  | 11.7086322 | 3.54950065  | 0.00261985 | 0.10453211 | Up   |
| Rnf208  | 44.1125607 | 0.88435857 | 2.48436145  | 4.58545961 | 2.19706634  | 0.0129784  | 0.1952997  | Up   |
| Rnft2   | 220.072992 | 0.53673946 | 2.70459702  | 2.73523339 | 1.45166394  | 0.00683873 | 0.14731379 | Up   |
| Rorb    | 23.2903216 | 0.90723953 | 4.01448916  | 12.4848213 | 3.64210327  | 5.96E-05   | 0.01714579 | Up   |
| Rph3a   | 66.3693301 | 1.15319542 | 2.37496026  | 6.67511779 | 2.7387933   | 0.01755084 | 0.22360127 | Up   |
| Rpl8    | 10.1950796 | 0.54185513 | 1.99640424  | 2.11661941 | 1.08176188  | 0.04588994 | 0.3388898  | Up   |
| Rprm    | 40.5825239 | 0.64064334 | 2.83168939  | 3.5164092  | 1.81410296  | 0.00463028 | 0.12835359 | Up   |
| Rprml   | 76.1318053 | 0.81201526 | -2.48680744 | 0.24667346 | -2.0193256  | 0.01288951 | 0.19490811 | Down |
| Rps6ka6 | 16.0164985 | 1.06200258 | 3.93631305  | 18.1308497 | 4.18037463  | 8.27E-05   | 0.02045967 | Up   |
| Rpusd2  | 46.9685602 | 0.64092828 | 3.18817232  | 4.12212944 | 2.04338981  | 0.00143175 | 0.08397226 | Up   |
| Rtbdn   | 7.1336103  | 0.91566947 | 2.13941049  | 3.88790477 | 1.95899288  | 0.03240244 | 0.29157212 | Up   |
| Rtkn    | 31.13947   | 0.50331636 | 2.10796597  | 2.08633923 | 1.06097376  | 0.03503393 | 0.3030883  | Up   |
| Rtl1    | 71.4258754 | 0.63244444 | 2.45893361  | 2.93862017 | 1.5551389   | 0.01393504 | 0.20060136 | Up   |
| Rtn1    | 1632.08197 | 0.595158   | 2.63255772  | 2.96244381 | 1.56678779  | 0.00847446 | 0.16206717 | Up   |
| Rtn4rl2 | 9.57038898 | 1.12503684 | 2.37400104  | 6.36799246 | 2.67083863  | 0.0175965  | 0.22369006 | Up   |
| Rundc3a | 287.498916 | 0.87936863 | 2.29124607  | 4.04138531 | 2.01484991  | 0.02194919 | 0.24434997 | Up   |
| Rundc3b | 83.7343565 | 0.84787066 | 2.7530078   | 5.0426935  | 2.33419454  | 0.00590505 | 0.13878051 | Up   |
| Runx3   | 17.3094508 | 0.58846549 | -1.97076526 | 0.44759712 | -1.15972735 | 0.04875073 | 0.34706725 | Down |
| Ryr1    | 71.7828216 | 0.82826841 | 2.3988603   | 3.96384408 | 1.98690021  | 0.01644619 | 0.21708968 | Up   |
| S100a5  | 8.63372065 | 0.54325642 | 2.38068761  | 2.45092071 | 1.29332381  | 0.01728036 | 0.2220893  | Up   |
| S1pr5   | 23.1078295 | 0.4917909  | -2.8915778  | 0.37318124 | -1.42205164 | 0.00383313 | 0.11947506 | Down |
| Sbk2    | 58.3505054 | 0.96588369 | -2.26159999 | 0.21999726 | -2.18444255 | 0.02372213 | 0.25244878 | Down |
| Scg2    | 502.20313  | 1.36734392 | 2.17303624  | 7.84236005 | 2.97128788  | 0.02977759 | 0.27823225 | Up   |
| Scg3    | 220.750594 | 0.91558276 | 3.03330978  | 6.85542517 | 2.77724614  | 0.00241887 | 0.10258232 | Up   |
| Scg5    | 133.703489 | 1.11760443 | 2.44137135  | 6.62760415 | 2.72848744  | 0.0146316  | 0.20429358 | Up   |
| Scgn    | 34.7715253 | 1.25317974 | 3.1933868   | 16.0209485 | 4.00188766  | 0.00140614 | 0.08311877 | Up   |

|           |            |            |             |            |             |            |            |      |
|-----------|------------|------------|-------------|------------|-------------|------------|------------|------|
| Scn1a     | 130.667256 | 1.10016555 | 2.42077305  | 6.33458942 | 2.66325111  | 0.01548754 | 0.21093817 | Up   |
| Scn3a     | 559.58005  | 0.40280092 | 2.85515159  | 2.21922769 | 1.15005769  | 0.00430163 | 0.12535612 | Up   |
| Scn3b     | 607.749647 | 0.60089705 | 3.24183174  | 3.85841182 | 1.94800714  | 0.00118764 | 0.0755064  | Up   |
| Scn5a     | 82.9264285 | 0.39322283 | 2.91495157  | 2.21334064 | 1.1462255   | 0.00355744 | 0.11765336 | Up   |
| Scn7a     | 21215.8742 | 0.62932573 | 2.8946535   | 3.53492579 | 1.82167993  | 0.00379577 | 0.11921035 | Up   |
| Scn8a     | 61.3351841 | 0.85800788 | 3.09762331  | 6.31063517 | 2.65778522  | 0.00195079 | 0.09602565 | Up   |
| Scn9a     | 1089.66068 | 1.26548142 | 2.39735362  | 8.1896765  | 3.03380646  | 0.01651398 | 0.21733088 | Up   |
| Scnn1g    | 8.84107573 | 1.07781049 | 2.90883852  | 8.78581837 | 3.13517667  | 0.00362774 | 0.11765336 | Up   |
| Scrg1     | 1.64038427 | 1.59009277 | 2.5412711   | 16.4595935 | 4.0408568   | 0.01104502 | 0.18105177 | Up   |
| Scrt2     | 9.39036584 | 1.07859921 | 2.4453084   | 6.22255777 | 2.63750772  | 0.01447283 | 0.20345185 | Up   |
| Sebox     | 3.18088254 | 0.90958975 | 2.0079113   | 3.54644984 | 1.82637554  | 0.04465272 | 0.33535353 | Up   |
| Sema4f    | 287.377523 | 0.54418691 | 2.60081046  | 2.66720185 | 1.41532701  | 0.00930038 | 0.16673014 | Up   |
| Serinc2   | 17.1018139 | 0.39019364 | -2.7280686  | 0.47814662 | -1.06447502 | 0.00637064 | 0.14347289 | Down |
| Serpina11 | 24.3239125 | 0.62143814 | 2.35537215  | 2.75818283 | 1.46371809  | 0.01850416 | 0.22813138 | Up   |
| Serpina12 | 2.70812095 | 1.94999724 | 2.44147838  | 27.1123094 | 4.7608761   | 0.01462726 | 0.20429358 | Up   |
| Serpinb10 | 27.9055268 | 1.1336394  | -3.24726376 | 0.07795438 | -3.68122613 | 0.0011652  | 0.0755064  | Down |
| Serpinb2  | 5.68380128 | 1.36648931 | -2.0579071  | 0.14238726 | -2.81210805 | 0.03959905 | 0.31831722 | Down |
| Serpine1  | 34683.7701 | 0.53801229 | -2.6968063  | 0.36578937 | -1.45091494 | 0.0070008  | 0.14848947 | Down |
| Serpini1  | 337.81996  | 0.58204742 | 2.26427687  | 2.4930581  | 1.3179165   | 0.02355709 | 0.25181326 | Up   |
| Sez6l     | 273.080863 | 0.81195429 | 2.10810183  | 3.2754255  | 1.71168233  | 0.03502218 | 0.3030883  | Up   |
| Sfrp5     | 1348.64941 | 0.58672838 | 3.4348634   | 4.04273556 | 2.01533184  | 0.00059285 | 0.05707898 | Up   |
| Sftpd     | 12.9584356 | 1.55992237 | -2.48288458 | 0.06824621 | -3.8731072  | 0.01303233 | 0.19533205 | Down |
| Sgk2      | 26.2578505 | 1.11438498 | -2.95735011 | 0.1018398  | -3.29562655 | 0.00310296 | 0.11220917 | Down |
| Sgpp2     | 134.467883 | 0.71405175 | 2.83338275  | 4.06479304 | 2.0231819   | 0.00460582 | 0.12834885 | Up   |
| Sgsm1     | 358.602158 | 0.6392009  | 2.68222569  | 3.28178576 | 1.71448106  | 0.00731341 | 0.15096738 | Up   |
| Sh2d1b    | 29.8408635 | 0.40448377 | -2.54215087 | 0.49030155 | -1.02825877 | 0.01101726 | 0.18093455 | Down |
| Sh2d1b2   | 425.647176 | 0.8563466  | -2.50977646 | 0.22543157 | -2.14923853 | 0.01208076 | 0.18902838 | Down |
| Sh2d5     | 3.47506835 | 1.05811789 | 2.26394421  | 5.26166671 | 2.39551987  | 0.02357755 | 0.25181326 | Up   |
| Sh3gl3    | 62.8956836 | 0.45464326 | 2.43024472  | 2.15083132 | 1.10489438  | 0.01508863 | 0.20776158 | Up   |
| Sh3tc2    | 518.864572 | 0.41039413 | 2.82962542  | 2.23652932 | 1.16126167  | 0.00466025 | 0.12835359 | Up   |
| Shank2    | 100.507316 | 0.70619277 | 1.99142481  | 2.65061992 | 1.40632981  | 0.0464342  | 0.33980779 | Up   |
| Shc2      | 329.58869  | 0.47381846 | 2.69524382  | 2.42343985 | 1.27705628  | 0.00703371 | 0.14848947 | Up   |

|          |            |            |             |            |             |            |            |      |
|----------|------------|------------|-------------|------------|-------------|------------|------------|------|
| Shisa2   | 8.17152319 | 0.86722329 | 3.09192066  | 6.41471699 | 2.68138562  | 0.00198866 | 0.09616605 | Up   |
| Shisa7   | 56.0374993 | 0.4768983  | 2.47673583  | 2.2675763  | 1.1811511   | 0.013259   | 0.19579674 | Up   |
| Shisa9   | 47.142256  | 0.59741846 | 3.27063328  | 3.87430276 | 1.9539367   | 0.00107307 | 0.07513311 | Up   |
| Shox2    | 90.6092386 | 0.8540629  | 2.11699781  | 3.50168494 | 1.80804929  | 0.03426003 | 0.30041322 | Up   |
| Siglech  | 2.58556818 | 1.08933627 | -1.99504002 | 0.22170767 | -2.17326944 | 0.04603852 | 0.3388898  | Down |
| Sla      | 250.71151  | 0.50810483 | -1.98627866 | 0.49680866 | -1.00923778 | 0.04700239 | 0.34082347 | Down |
| Slc10a4  | 253.297694 | 1.48696672 | 2.07011523  | 8.44555624 | 3.07819244  | 0.03844156 | 0.31463868 | Up   |
| Slc12a3  | 68.482618  | 0.46270156 | 3.25730157  | 2.84249638 | 1.50715851  | 0.00112477 | 0.07513311 | Up   |
| Slc13a3  | 42.7904904 | 0.70153223 | 2.26085326  | 3.00228604 | 1.58606144  | 0.02376835 | 0.25244878 | Up   |
| Slc17a2  | 5.18131069 | 1.01477797 | -2.02718822 | 0.24029092 | -2.05714593 | 0.04264317 | 0.33056156 | Down |
| Slc18a1  | 32.6350574 | 1.40193748 | 2.76588936  | 14.6985707 | 3.87760396  | 0.00567678 | 0.13652265 | Up   |
| Slc18a2  | 2144.22225 | 0.68256003 | 2.03192802  | 2.61518472 | 1.38691286  | 0.04216094 | 0.32843794 | Up   |
| Slc22a5  | 1072.53402 | 0.47958748 | -2.32632684 | 0.46147448 | -1.11567724 | 0.02000112 | 0.23378141 | Down |
| Slc24a2  | 148.552929 | 0.8560955  | 2.46211081  | 4.3103409  | 2.10780197  | 0.0138122  | 0.1999251  | Up   |
| Slc25a20 | 5633.67965 | 0.67700715 | -2.32526885 | 0.3358238  | -1.57422363 | 0.02005759 | 0.23397411 | Down |
| Slc25a27 | 164.610851 | 0.31905709 | 4.25544079  | 2.56281364 | 1.35772857  | 2.09E-05   | 0.00815122 | Up   |
| Slc26a3  | 26.0498422 | 0.84170571 | -2.63305347 | 0.21519909 | -2.21625613 | 0.0084621  | 0.16206717 | Down |
| Slc26a4  | 2.9171702  | 1.08062152 | 2.62553554  | 7.146368   | 2.83721021  | 0.00865128 | 0.16278867 | Up   |
| Slc26a7  | 43.9229806 | 0.720573   | 2.1361936   | 2.90650107 | 1.53928344  | 0.03266364 | 0.29255455 | Up   |
| Slc26a9  | 4.31176703 | 0.76193765 | -2.3070505  | 0.29569287 | -1.75782865 | 0.021052   | 0.24027457 | Down |
| Slc27a2  | 777.88229  | 1.14692002 | -2.26210227 | 0.16557418 | -2.59445038 | 0.02369109 | 0.25237906 | Down |
| Slc29a4  | 234.175858 | 0.84675274 | 2.65909545  | 4.76209485 | 2.25159636  | 0.00783508 | 0.15604809 | Up   |
| Slc30a10 | 11.8704875 | 1.19816066 | 2.4777379   | 7.82845751 | 2.96872807  | 0.01322182 | 0.19570985 | Up   |
| Slc30a3  | 264.339402 | 0.8812714  | -2.4774532  | 0.22017024 | -2.18330864 | 0.01323238 | 0.19570985 | Down |
| Slc35d3  | 53.8278475 | 1.43961623 | 3.51865264  | 33.4865409 | 5.06550945  | 0.00043374 | 0.04822098 | Up   |
| Slc35f1  | 1048.52137 | 0.54700233 | 3.00022673  | 3.11910264 | 1.64113103  | 0.00269779 | 0.10571953 | Up   |
| Slc35f3  | 42.9576324 | 0.83666879 | 2.18256034  | 3.5457237  | 1.82608012  | 0.0290682  | 0.27466439 | Up   |
| Slc35g2  | 59.6967268 | 0.54381743 | 2.9967586   | 3.09446403 | 1.62968955  | 0.00272867 | 0.10619684 | Up   |
| Slc39a2  | 3.53366602 | 0.75792372 | 1.96133531  | 2.80216628 | 1.48654257  | 0.04983992 | 0.35032234 | Up   |
| Slc40a1  | 457.708554 | 0.54590878 | -2.58652515 | 0.3757886  | -1.41200678 | 0.00969491 | 0.1691887  | Down |
| Slc44a5  | 60.3008558 | 1.13502928 | 2.54537844  | 7.40797409 | 2.88907905  | 0.01091594 | 0.17977503 | Up   |
| Slc45a1  | 102.160421 | 0.85579283 | 2.4858444   | 4.36919595 | 2.12736781  | 0.01292445 | 0.19510024 | Up   |

|         |            |            |             |            |             |            |            |      |
|---------|------------|------------|-------------|------------|-------------|------------|------------|------|
| Slc4a4  | 9984.7185  | 0.60523839 | -2.16781979 | 0.40274881 | -1.31204776 | 0.0301724  | 0.28011986 | Down |
| Slc4a8  | 337.775473 | 0.94299846 | 2.63855449  | 5.61059131 | 2.48815283  | 0.00832603 | 0.16080508 | Up   |
| Slc5a7  | 33.629015  | 1.24861412 | 3.81698677  | 27.2077091 | 4.76594358  | 0.00013509 | 0.02927981 | Up   |
| Slc6a13 | 44.9103518 | 0.57439931 | 2.05620242  | 2.26746651 | 1.18108124  | 0.03976301 | 0.31934098 | Up   |
| Slc6a15 | 134.86563  | 0.99568546 | 3.23287185  | 9.31091846 | 3.21892349  | 0.00122553 | 0.07684043 | Up   |
| Slc6a2  | 3212.87945 | 1.34048992 | 2.39258293  | 9.23577682 | 3.20723331  | 0.01673025 | 0.218623   | Up   |
| Slc6a4  | 821.497759 | 0.44878721 | -2.45423433 | 0.46605464 | -1.10142898 | 0.01411849 | 0.20151568 | Down |
| Slc6a5  | 1.73640442 | 1.33387067 | 2.2320239   | 7.87473404 | 2.9772312   | 0.02561338 | 0.25860371 | Up   |
| Slc7a14 | 327.97435  | 1.46549007 | 2.13415157  | 8.73966469 | 3.12757793  | 0.03283038 | 0.29272223 | Up   |
| Slc7a4  | 61.2047165 | 0.80732551 | 2.92846655  | 5.14876266 | 2.36422577  | 0.00340638 | 0.11749016 | Up   |
| Slco1a2 | 167.871279 | 0.38108294 | 2.85773474  | 2.12731541 | 1.08903395  | 0.00426677 | 0.12463794 | Up   |
| Slitrk1 | 193.483706 | 0.79655395 | 2.84328053  | 4.80596567 | 2.26482634  | 0.00446517 | 0.12655312 | Up   |
| Slitrk2 | 559.254662 | 0.7488029  | 2.68162699  | 4.02227039 | 2.00801007  | 0.00732651 | 0.15096738 | Up   |
| Slitrk5 | 24.2094265 | 0.98316325 | 3.10876037  | 8.31905087 | 3.05641894  | 0.00187874 | 0.09410949 | Up   |
| Smc1b   | 51.0631271 | 0.53983082 | -2.32982339 | 0.41820712 | -1.25771046 | 0.01981549 | 0.23375308 | Down |
| Smim17  | 86.9533733 | 0.84203535 | 2.75750266  | 4.99995365 | 2.32191472  | 0.00582447 | 0.13824882 | Up   |
| Snap25  | 1253.45988 | 1.26467166 | 2.2545428   | 7.21628536 | 2.85125639  | 0.02416204 | 0.25399649 | Up   |
| Snap91  | 374.586377 | 1.39755583 | 2.2346952   | 8.71264822 | 3.12311129  | 0.02543737 | 0.25812931 | Up   |
| Snca    | 244.691627 | 0.74042875 | 3.01737787  | 4.70486497 | 2.23415332  | 0.00254972 | 0.10361769 | Up   |
| Sncg    | 3012.99844 | 0.37245517 | 4.07974401  | 2.86695991 | 1.51952173  | 4.51E-05   | 0.01389776 | Up   |
| Snhg11  | 198.937067 | 1.39065969 | 2.0989041   | 7.56248991 | 2.91886131  | 0.03582536 | 0.30524461 | Up   |
| Snph    | 162.441086 | 0.90388742 | 2.83812419  | 5.91896425 | 2.56534474  | 0.00453795 | 0.12746927 | Up   |
| Sntg1   | 3.76357706 | 1.6987196  | 2.14819331  | 12.5461959 | 3.64917809  | 0.0316984  | 0.28757339 | Up   |
| Soga3   | 636.03171  | 0.56039606 | 2.9191842   | 3.10781222 | 1.63589933  | 0.00350949 | 0.11765336 | Up   |
| Sorcs1  | 768.305309 | 0.81869359 | 2.66799161  | 4.54496012 | 2.18426763  | 0.00763062 | 0.15487064 | Up   |
| Sostdc1 | 843.980821 | 0.77068995 | 2.55972928  | 3.92517675 | 1.97275762  | 0.01047537 | 0.17495561 | Up   |
| Sox10   | 877.665659 | 0.64888813 | 2.68496028  | 3.34553943 | 1.74223885  | 0.00725384 | 0.15052566 | Up   |
| Sox2    | 94.71377   | 0.82889112 | 3.05201702  | 5.77487537 | 2.52978981  | 0.00227309 | 0.10180205 | Up   |
| Sox3    | 2.66649164 | 1.62786605 | 2.91066761  | 26.6890677 | 4.738177    | 0.00360657 | 0.11765336 | Up   |
| Spatc1  | 11.5815477 | 0.55775728 | 3.33196078  | 3.6261168  | 1.85842539  | 0.00086236 | 0.06758779 | Up   |
| Sphkap  | 390.072605 | 0.69683586 | -2.14788042 | 0.35435809 | -1.4967201  | 0.03172326 | 0.28757339 | Down |
| Spink13 | 1.33319143 | 1.20109794 | 2.14284026  | 5.95359478 | 2.57376103  | 0.03212593 | 0.29047053 | Up   |

|            |            |            |             |            |             |            |            |      |
|------------|------------|------------|-------------|------------|-------------|------------|------------|------|
| Spire2     | 39.0233348 | 0.82162761 | 3.85442098  | 8.98114068 | 3.16689869  | 0.000116   | 0.02610979 | Up   |
| Spn        | 306.535167 | 0.35738981 | -3.24184413 | 0.44794638 | -1.15860206 | 0.00118759 | 0.0755064  | Down |
| Spock2     | 2582.81087 | 0.33568749 | 3.5962139   | 2.30889729 | 1.207204    | 0.00032288 | 0.04354755 | Up   |
| Spock3     | 69.2613983 | 1.27719764 | 2.43134342  | 8.60578078 | 3.10530609  | 0.01504295 | 0.20762107 | Up   |
| Sptbn2     | 553.304235 | 0.70828182 | 2.69477743  | 3.7546069  | 1.90866187  | 0.00704357 | 0.14848947 | Up   |
| Srm3       | 38.5306596 | 0.70532844 | 3.96611717  | 6.95193804 | 2.79741522  | 7.31E-05   | 0.01973104 | Up   |
| St6galnac5 | 77.7847496 | 1.18746919 | 2.36504004  | 7.00513174 | 2.80841218  | 0.01802812 | 0.22575015 | Up   |
| St8sia1    | 65.77091   | 1.01787216 | 2.59671681  | 6.24683643 | 2.64312576  | 0.00941195 | 0.16775245 | Up   |
| St8sia6    | 112.517932 | 0.47342746 | 3.5624143   | 3.2188487  | 1.68654477  | 0.00036746 | 0.04667955 | Up   |
| Stc2       | 28.2972548 | 0.58210593 | -2.05659351 | 0.43613441 | -1.19715528 | 0.03972534 | 0.3191845  | Down |
| Stk32a     | 193.437303 | 1.05042669 | 3.04435394  | 9.17603323 | 3.19787062  | 0.00233181 | 0.10208776 | Up   |
| Stk32c     | 171.439851 | 0.52169118 | 2.49159122  | 2.46201776 | 1.29984117  | 0.01271723 | 0.1933019  | Up   |
| Stk4       | 3022.81073 | 0.50997815 | -2.07366073 | 0.4804567  | -1.05752167 | 0.03811083 | 0.31397173 | Down |
| Stmn1      | 629.003851 | 0.40655839 | 2.89499071  | 2.2610341  | 1.17698275  | 0.0037917  | 0.11921035 | Up   |
| Stmn2      | 2141.25437 | 1.19136232 | 2.53385652  | 8.1046011  | 3.01874118  | 0.01128149 | 0.18303254 | Up   |
| Stmn3      | 575.067154 | 0.8074189  | 2.3624167   | 3.75148007 | 1.90745989  | 0.01815622 | 0.22676639 | Up   |
| Stmn4      | 58.7901673 | 0.7008309  | 2.38841778  | 3.19070888 | 1.67387698  | 0.01692109 | 0.22004943 | Up   |
| Stx1a      | 220.995069 | 0.47539953 | 2.80356783  | 2.51893662 | 1.33281483  | 0.00505406 | 0.1309732  | Up   |
| Stxbp5l    | 96.7282461 | 0.78257786 | 2.88755288  | 4.78903493 | 2.25973496  | 0.00388251 | 0.11958141 | Up   |
| Sucla2     | 9427.61793 | 0.65555368 | -2.15554119 | 0.37551099 | -1.41307297 | 0.03111951 | 0.28425291 | Down |
| Sucnr1     | 172.359424 | 0.48040397 | 2.2479188   | 2.1139029  | 1.07990911  | 0.02458137 | 0.25464478 | Up   |
| Sult1b1    | 13.8535515 | 0.91525864 | 2.3921687   | 4.56132536 | 2.18945308  | 0.01674914 | 0.218623   | Up   |
| Sult4a1    | 646.458921 | 1.51722757 | 1.97991833  | 8.02213743 | 3.00398668  | 0.04771271 | 0.34386054 | Up   |
| Sv2b       | 243.867954 | 0.8355464  | 3.28971579  | 6.72115966 | 2.74871018  | 0.00100289 | 0.07315294 | Up   |
| Sv2c       | 3851.30949 | 0.53141862 | 3.26227701  | 3.32564634 | 1.73363476  | 0.00110521 | 0.07513311 | Up   |
| Svop       | 78.2324947 | 1.2215421  | 2.32801893  | 7.17895145 | 2.84377314  | 0.0199111  | 0.23375308 | Up   |
| Syn1       | 328.866005 | 0.80313613 | 2.80398956  | 4.76337896 | 2.25198533  | 0.00504745 | 0.1309732  | Up   |
| Syn2       | 1512.83432 | 0.71434183 | 3.32083327  | 5.17733665 | 2.37221013  | 0.00089749 | 0.0690267  | Up   |
| Syndig1l   | 14.5953146 | 1.08054735 | 2.55057941  | 6.75530931 | 2.75602183  | 0.0107544  | 0.17794937 | Up   |
| Syng3      | 361.695877 | 0.85889428 | 3.18050797  | 6.64247137 | 2.73172011  | 0.00147017 | 0.08453633 | Up   |
| Synpr      | 206.70084  | 1.12754467 | 1.99296114  | 4.74744967 | 2.2471527   | 0.0462657  | 0.33970751 | Up   |
| Syp        | 1191.58448 | 1.1848885  | 2.51928249  | 7.91763107 | 2.98506884  | 0.01175943 | 0.18598964 | Up   |

|         |            |            |             |            |             |            |            |      |
|---------|------------|------------|-------------|------------|-------------|------------|------------|------|
| Sypl2   | 3.83665749 | 0.9344678  | 2.85397574  | 6.35084445 | 2.66694844  | 0.00431758 | 0.12535612 | Up   |
| Syt1    | 2257.48766 | 1.13823409 | 2.95511074  | 10.2931153 | 3.36360779  | 0.00312557 | 0.11220917 | Up   |
| Syt16   | 61.2000672 | 0.61077871 | 2.4303568   | 2.79802757 | 1.48441018  | 0.01508397 | 0.20776158 | Up   |
| Syt17   | 234.953904 | 0.80191183 | 2.69564223  | 4.47431677 | 2.1616674   | 0.00702531 | 0.14848947 | Up   |
| Syt2    | 123.391049 | 0.86208795 | 2.19992639  | 3.72316623 | 1.89653003  | 0.02781212 | 0.26849213 | Up   |
| Syt4    | 1226.23375 | 1.41815398 | 2.29425122  | 9.53743627 | 3.25360151  | 0.02177607 | 0.24261385 | Up   |
| T2      | 13.5121726 | 0.89833372 | 2.50674377  | 4.7630723  | 2.25189245  | 0.0121849  | 0.18964372 | Up   |
| Tacr1   | 252.847375 | 0.44828221 | 2.81423728  | 2.3975693  | 1.26157252  | 0.00488931 | 0.1293445  | Up   |
| Tal1    | 1126.11883 | 0.46878442 | -2.29823995 | 0.47388895 | -1.07737907 | 0.02154814 | 0.24132517 | Down |
| Tal2    | 18.7907628 | 0.41170075 | 2.71772948  | 2.17180001 | 1.11889126  | 0.00657316 | 0.1458793  | Up   |
| Tas1r1  | 82.3876862 | 0.74144697 | -2.04806249 | 0.34904145 | -1.51852972 | 0.04055388 | 0.32241266 | Down |
| Tbx20   | 288.770048 | 1.03643164 | 2.78307001  | 7.38430325 | 2.8844618   | 0.00538472 | 0.13458694 | Up   |
| Tbx21   | 29.8900552 | 0.59333867 | -3.46204569 | 0.24078783 | -2.0541656  | 0.00053609 | 0.05472814 | Down |
| Tceal3  | 18.3739053 | 0.79043153 | 2.54299002  | 4.02798829 | 2.01005949  | 0.01099084 | 0.1806696  | Up   |
| Tcfl5   | 7.93991028 | 1.28399287 | 2.2832979   | 7.63029167 | 2.93173821  | 0.02241283 | 0.24667005 | Up   |
| Tcte1   | 102.12512  | 1.02883382 | 2.31210943  | 5.20095437 | 2.37877638  | 0.02077165 | 0.23803339 | Up   |
| Tdh     | 16.3366905 | 0.60874948 | 2.91340666  | 3.41890606 | 1.77353478  | 0.00357509 | 0.11765336 | Up   |
| Tdo2    | 20.0297784 | 0.67838273 | 2.01337745  | 2.57726429 | 1.36584049  | 0.04407494 | 0.33496951 | Up   |
| Tdrd1   | 86.9343945 | 0.99601583 | -2.59156388 | 0.16709742 | -2.58123865 | 0.00955408 | 0.16857431 | Down |
| Tdrd12  | 50.8927677 | 0.534832   | 2.35033982  | 2.39004362 | 1.25703695  | 0.01875628 | 0.22895717 | Up   |
| Tdrd15  | 2.3698284  | 0.88895919 | 1.9898606   | 3.40795167 | 1.76890488  | 0.04660629 | 0.34029854 | Up   |
| Tdrkh   | 223.155153 | 0.39033769 | 2.75690088  | 2.10836161 | 1.07612233  | 0.0058352  | 0.13824882 | Up   |
| Tekt1   | 4.14721155 | 0.74801175 | 1.99069693  | 2.80706934 | 1.4890647   | 0.04651422 | 0.33996819 | Up   |
| Tekt4   | 3.18696743 | 0.97571333 | 2.97189473  | 7.46280141 | 2.8997173   | 0.00295968 | 0.11078927 | Up   |
| Tenm1   | 290.750207 | 0.5976077  | 2.88761581  | 3.30731723 | 1.72566143  | 0.00388174 | 0.11958141 | Up   |
| Tenm2   | 437.658247 | 0.85104043 | 3.24939372  | 6.799202   | 2.76536543  | 0.00115651 | 0.0755064  | Up   |
| Tex13b  | 80.6378573 | 0.52857273 | -1.99893273 | 0.48076997 | -1.05658132 | 0.04561563 | 0.33818752 | Down |
| Tfap2c  | 4.24469458 | 1.31939379 | -3.50716575 | 0.04046076 | -4.62733272 | 0.00045291 | 0.04989294 | Down |
| Tfcp2l1 | 278.276894 | 0.49071185 | 3.63085157  | 3.43831544 | 1.78170191  | 0.00028249 | 0.03982596 | Up   |
| Th      | 1248.53093 | 1.43519609 | 2.21564585  | 9.06235667 | 3.17988627  | 0.02671577 | 0.2626103  | Up   |
| Thap8   | 1.33794963 | 1.61835292 | 2.31597768  | 13.4363489 | 3.74806926  | 0.02055949 | 0.23696155 | Up   |
| Thbs4   | 844.296354 | 0.45014359 | 2.946563    | 2.50772028 | 1.32637643  | 0.00321327 | 0.11305042 | Up   |

|          |            |            |             |            |             |            |            |      |
|----------|------------|------------|-------------|------------|-------------|------------|------------|------|
| Thy1     | 2322.7155  | 0.85017764 | 3.01107901  | 5.89688089 | 2.55995205  | 0.00260321 | 0.1043424  | Up   |
| Tll2     | 20.6675273 | 0.71068461 | 2.07208932  | 2.77521969 | 1.47260198  | 0.03825711 | 0.31443816 | Up   |
| Tlx2     | 4.53956876 | 1.98533357 | 2.77332588  | 45.4427098 | 5.50597696  | 0.00554865 | 0.13571584 | Up   |
| Tma7     | 61.7274476 | 1.00928058 | -2.81641659 | 0.13941382 | -2.84255456 | 0.00485627 | 0.12898123 | Down |
| Tmco3    | 47.5292515 | 0.65935045 | 3.04617148  | 4.02362131 | 2.00849453  | 0.00231776 | 0.1020795  | Up   |
| Tmem130  | 570.473845 | 1.21143572 | 2.40081534  | 7.50802502 | 2.90843346  | 0.01635859 | 0.21667611 | Up   |
| Tmem150c | 399.28166  | 0.48063415 | 2.7313618   | 2.48420764 | 1.31278577  | 0.00630732 | 0.14333382 | Up   |
| Tmem169  | 23.2256994 | 0.81294086 | 3.4405875   | 6.94990933 | 2.79699416  | 0.00058045 | 0.05707898 | Up   |
| Tmem178b | 596.08058  | 1.24237594 | 2.49543694  | 8.57579739 | 3.10027082  | 0.01258021 | 0.19290113 | Up   |
| Tmem200c | 183.86036  | 0.60628313 | 2.83753552  | 3.29516319 | 1.72034991  | 0.00454633 | 0.12750056 | Up   |
| Tmem202  | 13.203644  | 0.72475195 | 2.66071723  | 3.80622278 | 1.92836     | 0.00779744 | 0.1558676  | Up   |
| Tmem229a | 158.897599 | 1.10013161 | 2.10336319  | 4.9725171  | 2.31397633  | 0.03543403 | 0.30404687 | Up   |
| Tmem255a | 178.09022  | 0.76162089 | 2.27132256  | 3.31701767 | 1.7298867   | 0.02312746 | 0.25032408 | Up   |
| Tmem35   | 277.189435 | 0.62582699 | 3.65314892  | 4.87782908 | 2.28623921  | 0.00025904 | 0.03854046 | Up   |
| Tmem59l  | 106.900364 | 0.98103801 | 2.82506777  | 6.82816953 | 2.77149888  | 0.00472706 | 0.12835359 | Up   |
| Tmem71   | 119.051794 | 0.66515725 | -2.71598842 | 0.28587188 | -1.8065594  | 0.00660782 | 0.1458793  | Down |
| Tmem74   | 80.2936236 | 0.66618871 | 3.97367049  | 6.2645654  | 2.64721443  | 7.08E-05   | 0.01941404 | Up   |
| Tmem79   | 796.917508 | 1.0687308  | -2.31019462 | 0.18061929 | -2.46897614 | 0.02087738 | 0.2387774  | Down |
| Tmem88b  | 49.2133779 | 0.49519569 | 2.55912007  | 2.40704855 | 1.26726524  | 0.01049375 | 0.17495561 | Up   |
| Tmie     | 18.3969821 | 0.9422778  | 2.22876718  | 4.28744404 | 2.10011784  | 0.0258294  | 0.25871634 | Up   |
| Tmod2    | 2141.67755 | 0.41023217 | 3.48133692  | 2.69102615 | 1.42815641  | 0.00049892 | 0.05248159 | Up   |
| Tmprss5  | 428.938855 | 0.81305223 | 2.27706072  | 3.60842505 | 1.85136929  | 0.0227826  | 0.24857175 | Up   |
| Tnfrsf9  | 103.427242 | 0.39507838 | -3.67982809 | 0.36505342 | -1.45382051 | 0.00023339 | 0.03759098 | Down |
| Tnn      | 17.8745507 | 0.56135588 | -1.99624319 | 0.45990161 | -1.12060285 | 0.04590746 | 0.3388898  | Down |
| Tnni2    | 7.27652306 | 1.43308911 | 2.32464164  | 10.0660002 | 3.33141862  | 0.02009113 | 0.23414087 | Up   |
| Tnr      | 272.498886 | 0.81676735 | 3.12212285  | 5.85653768 | 2.55004801  | 0.00179552 | 0.09217002 | Up   |
| Topaz1   | 21.0530634 | 0.50443256 | -2.40008099 | 0.43206522 | -1.210679   | 0.01639144 | 0.21669293 | Down |
| Tppp3    | 1386.5382  | 0.46417758 | 2.69847312  | 2.38265609 | 1.25257073  | 0.00696584 | 0.148233   | Up   |
| Tram111  | 74.1175406 | 0.86424346 | 2.88641822  | 5.63559553 | 2.49456807  | 0.00389654 | 0.1195938  | Up   |
| Trem11   | 367.058814 | 1.21232831 | -2.47669393 | 0.12477786 | -3.00256617 | 0.01326056 | 0.19579674 | Down |
| Trem12   | 178.091826 | 0.73525935 | -2.6971589  | 0.25294379 | -1.98311129 | 0.00699339 | 0.14848947 | Down |
| Trhr     | 4.68249264 | 0.76308174 | 2.43032173  | 3.61634954 | 1.85453413  | 0.01508543 | 0.20776158 | Up   |



|         |            |            |             |            |             |            |            |      |
|---------|------------|------------|-------------|------------|-------------|------------|------------|------|
| Trim10  | 22.7080678 | 0.59850306 | 2.52618158  | 2.85190795 | 1.51192742  | 0.01153099 | 0.18491595 | Up   |
| Trim16  | 1523.43914 | 0.42330762 | -2.44383942 | 0.48818645 | -1.03449584 | 0.01453189 | 0.20360887 | Down |
| Trim43a | 11.8730021 | 0.41586573 | -2.78427207 | 0.44816959 | -1.15788335 | 0.0053648  | 0.13454922 | Down |
| Trim67  | 402.87896  | 1.18458039 | -2.16370565 | 0.16921352 | -2.56308328 | 0.03048695 | 0.28128299 | Down |
| Trnp1   | 475.445933 | 0.61899179 | 2.73921711  | 3.23900993 | 1.69555289  | 0.00615857 | 0.14151811 | Up   |
| Tro     | 122.530351 | 0.68942127 | 2.16925837  | 2.81968278 | 1.49553287  | 0.03006307 | 0.27933618 | Up   |
| Trpm3   | 617.509113 | 0.4138674  | 2.96730409  | 2.34253469 | 1.22807042  | 0.00300424 | 0.11179679 | Up   |
| Tsen34  | 77.6958549 | 0.62248768 | -2.79021869 | 0.30001848 | -1.73687675 | 0.00526725 | 0.13324165 | Down |
| Ttbk1   | 57.6360523 | 1.23465548 | 2.94796934  | 12.46427   | 3.63972649  | 0.00319869 | 0.11305042 | Up   |
| Ttn     | 1603.10025 | 1.13998671 | 3.20506485  | 12.5858551 | 3.65373133  | 0.00135032 | 0.08131578 | Up   |
| Ttyh1   | 940.961134 | 0.65520507 | 2.67355072  | 3.36760744 | 1.75172398  | 0.00750529 | 0.15356983 | Up   |
| Tub     | 839.141733 | 0.72992265 | 3.58656373  | 6.13861885 | 2.6179141   | 0.00033506 | 0.04392686 | Up   |
| Tuba1a  | 8111.21515 | 0.32516345 | 3.40483695  | 2.15416464 | 1.10712852  | 0.00066204 | 0.05960358 | Up   |
| Tuba8   | 274.273599 | 1.18801322 | -2.40360144 | 0.13816745 | -2.85551028 | 0.01623446 | 0.21624599 | Down |
| Tubb1   | 1952.4153  | 1.21219483 | -2.57271577 | 0.11513252 | -3.11863276 | 0.0100904  | 0.17266943 | Down |
| Tubb2b  | 681.658705 | 0.80621911 | 3.0244369   | 5.42024791 | 2.43835884  | 0.00249096 | 0.10289734 | Up   |
| Tubb3   | 3362.80397 | 1.30123695 | 2.33554587  | 8.21977324 | 3.03909859  | 0.01951492 | 0.23322259 | Up   |
| Tubb4a  | 631.41991  | 0.78839543 | 3.04287527  | 5.27433404 | 2.39898894  | 0.00234329 | 0.10233551 | Up   |
| Uchl1   | 2205.32294 | 0.88301039 | 2.82238634  | 5.62633887 | 2.49219645  | 0.00476677 | 0.12836919 | Up   |
| Ucp1    | 21751.6486 | 1.35668132 | -2.13458522 | 0.13434812 | -2.89595191 | 0.03279491 | 0.29255455 | Down |
| Ugt8    | 265.68249  | 0.77594868 | 2.25264754  | 3.3587837  | 1.74793889  | 0.02428138 | 0.25434602 | Up   |
| Unc79   | 186.745004 | 0.60253311 | 2.49215136  | 2.83157297 | 1.50160371  | 0.01269719 | 0.1933019  | Up   |
| Upk1b   | 34.5074704 | 0.75957144 | -2.47087361 | 0.27228605 | -1.87680502 | 0.01347834 | 0.19784767 | Down |
| Upk3b   | 28.8544509 | 1.48516781 | -3.4935367  | 0.02742265 | -5.18848825 | 0.00047667 | 0.05133972 | Down |
| Ush1c   | 42.6620265 | 1.60170744 | -3.10421094 | 0.03186159 | -4.97203775 | 0.00190787 | 0.09438816 | Down |
| Usp18   | 604.555719 | 0.44519103 | -2.41486785 | 0.47464556 | -1.0750775  | 0.01574092 | 0.21208564 | Down |
| Vamp1   | 1376.23789 | 0.58130762 | 2.92071605  | 3.24413646 | 1.69783451  | 0.00349228 | 0.11765336 | Up   |
| Vat11   | 2044.31107 | 0.72134493 | 2.97333319  | 4.42230593 | 2.14479883  | 0.00294584 | 0.11074358 | Up   |
| Vgf     | 111.959408 | 1.2451703  | 2.26619042  | 7.07040574 | 2.82179301  | 0.02343973 | 0.25139046 | Up   |
| Vten1   | 229.789452 | 0.45937576 | -2.69018287 | 0.42460557 | -1.23580479 | 0.00714129 | 0.1494308  | Down |
| Vwa5b1  | 20.8007438 | 1.21403713 | 2.17665643  | 6.24430815 | 2.64254173  | 0.02950621 | 0.27745637 | Up   |
| Vwa7    | 225.632369 | 0.61558507 | 2.20572169  | 2.5629571  | 1.35780933  | 0.02740349 | 0.26644556 | Up   |

|         |            |            |             |            |             |            |            |      |
|---------|------------|------------|-------------|------------|-------------|------------|------------|------|
| Vwde    | 36.6477373 | 0.52490512 | -2.24056119 | 0.44255172 | -1.17608204 | 0.02505451 | 0.25706106 | Down |
| Wasf3   | 67.7909247 | 0.97246227 | 3.46377699  | 10.3273088 | 3.36839245  | 0.00053265 | 0.05472814 | Up   |
| Wbp11   | 22.2241067 | 0.67214272 | 2.96099276  | 3.9729475  | 1.99020973  | 0.00306649 | 0.1121752  | Up   |
| Wfdc21  | 12.8309518 | 1.85050462 | -2.32767712 | 0.05050685 | -4.30737726 | 0.01992926 | 0.23375308 | Down |
| Wnk2    | 413.145101 | 0.4448884  | 2.28013973  | 2.02007342 | 1.01440773  | 0.0225994  | 0.24735221 | Up   |
| Wnk3    | 96.0554766 | 0.40370198 | 2.84044121  | 2.21405603 | 1.14669173  | 0.00450512 | 0.1269532  | Up   |
| Wnt10a  | 6.81514253 | 1.15588617 | 2.06709049  | 5.23910839 | 2.38932131  | 0.03872563 | 0.31497635 | Up   |
| Wnt6    | 158.446942 | 0.72839178 | 2.9527345   | 4.44057819 | 2.15074754  | 0.00314973 | 0.11220917 | Up   |
| Xirp2   | 16.8609567 | 1.68686906 | 2.68804219  | 23.1730365 | 4.5343752   | 0.00718723 | 0.14975671 | Up   |
| Xkr7    | 102.346419 | 0.57022146 | 3.59625541  | 4.14296033 | 2.05066201  | 0.00032283 | 0.04354755 | Up   |
| Zar1    | 90.8372547 | 0.57963464 | 2.0864115   | 2.31234453 | 1.20935637  | 0.03694136 | 0.31019318 | Up   |
| Zc3h12d | 52.5070488 | 0.49919282 | -2.28239741 | 0.45396205 | -1.1393564  | 0.02246589 | 0.24667005 | Down |
| Zcchc18 | 273.151623 | 0.91876974 | 3.06349872  | 7.03548519 | 2.81464992  | 0.00218765 | 0.10001669 | Up   |
| Zdbf2   | 50.7442132 | 0.93565947 | 3.13650856  | 7.64599331 | 2.93470394  | 0.00170972 | 0.08959977 | Up   |
| Zdhhc22 | 11.7464543 | 1.68338768 | 3.49807922  | 59.2450809 | 5.88862347  | 0.00046862 | 0.05078473 | Up   |
| Zfp385c | 195.493336 | 0.73842692 | -2.01369045 | 0.35676272 | -1.48696324 | 0.04404204 | 0.33496951 | Down |
| Zfp428  | 70.0755899 | 0.41049923 | 2.46750903  | 2.01797814 | 1.01291055  | 0.01360568 | 0.19838979 | Up   |
| Zfp421  | 3.69576635 | 1.54618399 | 2.69508767  | 17.9648055 | 4.16710141  | 0.00703701 | 0.14848947 | Up   |
| Zfp536  | 314.81189  | 0.57212641 | 2.77405465  | 3.0044688  | 1.58710994  | 0.00553624 | 0.13571584 | Up   |
| Zfp622  | 15.5555067 | 0.82081977 | 2.01110074  | 3.13997103 | 1.65075125  | 0.04431482 | 0.33535353 | Up   |
| Zfp92   | 17.5047063 | 0.72106906 | 2.35941782  | 3.25194575 | 1.70130319  | 0.01830363 | 0.22725502 | Up   |
| Zfyve28 | 218.127202 | 0.54246098 | 2.17319693  | 2.2640009  | 1.17887453  | 0.0297655  | 0.27823225 | Up   |
| Zic2    | 4.78355153 | 0.67061954 | 2.48018179  | 3.16731064 | 1.66325837  | 0.01313154 | 0.19537063 | Up   |
| Zkscan2 | 1.87544596 | 2.0670282  | 2.04702889  | 18.781839  | 4.23126643  | 0.04065525 | 0.32252306 | Up   |
| Zmat4   | 1.27389205 | 1.69353924 | -1.96777492 | 0.09926961 | -3.33250404 | 0.04909394 | 0.34834866 | Down |
| Zwint   | 5691.5512  | 0.39220992 | 2.74511215  | 2.10914784 | 1.07666022  | 0.00604902 | 0.14065779 | Up   |

**Supplementary table 3:** The comparison between high-dose EWH treated and the control female SHR for identified DE-lncRNA

| lncRNA             | case_value  | control_value | FoldChange   | log2FoldChange | z-score      | pValue      | qValue      | Regulation |
|--------------------|-------------|---------------|--------------|----------------|--------------|-------------|-------------|------------|
| ENSRNOT00000036416 | 13.49383423 | 0.485749094   | -2.279881949 | 0.464113449    | -1.107450591 | 0.022614691 | 0.368504563 | Down       |
| ENSRNOT00000076115 | 11.31124164 | 0.890369883   | 2.567001042  | 4.875602186    | 2.285580417  | 0.01025823  | 0.282373835 | Up         |
| ENSRNOT00000077064 | 4.774303135 | 1.348930089   | 2.284941363  | 8.469202685    | 3.082226157  | 0.022316266 | 0.368017948 | Up         |
| ENSRNOT00000077174 | 82.800395   | 0.926232998   | 2.940491836  | 6.605100749    | 2.723580567  | 0.003276916 | 0.188041953 | Up         |
| ENSRNOT00000077381 | 7.106646576 | 0.793271848   | -2.423215414 | 0.263839309    | -1.922268571 | 0.015383801 | 0.33359834  | Down       |
| ENSRNOT00000077836 | 22.14080563 | 0.523941264   | 3.393148068  | 3.429053197    | 1.777810286  | 0.000690943 | 0.098993882 | Up         |
| ENSRNOT00000080296 | 1.562268426 | 1.158730975   | 2.042834022  | 5.15901291     | 2.367095057  | 0.041068871 | 0.470957138 | Up         |
| ENSRNOT00000080610 | 12.34928765 | 0.515988856   | 2.009561566  | 2.051830239    | 1.036911373  | 0.044477613 | 0.48619048  | Up         |
| ENSRNOT00000081706 | 3.562823192 | 1.330281444   | 2.094913516  | 6.901091575    | 2.786824577  | 0.036178681 | 0.439894428 | Up         |
| ENSRNOT00000081968 | 15.22832799 | 1.094741046   | -2.240576761 | 0.182649366    | -2.452851347 | 0.025053503 | 0.37910631  | Down       |
| ENSRNOT00000081969 | 5.258374158 | 0.843984594   | 3.250262748  | 6.695406665    | 2.743171684  | 0.001152984 | 0.116700014 | Up         |
| ENSRNOT00000082193 | 4.105606666 | 0.768806282   | 3.000727716  | 4.948455544    | 2.306978318  | 0.002693353 | 0.164833194 | Up         |
| ENSRNOT00000082259 | 9.910583243 | 1.155644274   | -2.466567196 | 0.138650598    | -2.850474256 | 0.013641513 | 0.322478343 | Down       |
| ENSRNOT00000082644 | 1.854877695 | 1.42239749    | 3.020973682  | 19.65773753    | 4.297025382  | 0.002519633 | 0.160256235 | Up         |
| ENSRNOT00000083048 | 3.254416026 | 1.847682097   | -2.269689022 | 0.054648899    | -4.193663771 | 0.023226458 | 0.368504563 | Down       |
| ENSRNOT00000083059 | 7.638821843 | 1.50542154    | -2.26964444  | 0.09363738     | -3.416771628 | 0.023229165 | 0.368504563 | Down       |
| ENSRNOT00000083795 | 104.0169458 | 0.569668318   | 2.43643124   | 2.617079383    | 1.387957686  | 0.014832989 | 0.333469814 | Up         |
| ENSRNOT00000084699 | 23.91876143 | 0.373479907   | 3.247238936  | 2.317836008    | 1.212778496  | 0.001165305 | 0.116700014 | Up         |
| ENSRNOT00000084733 | 37.30509407 | 0.749877115   | 3.560447634  | 6.363842802    | 2.669898199  | 0.000370223 | 0.07552552  | Up         |
| ENSRNOT00000085058 | 14.40803567 | 0.660763329   | 2.568814195  | 3.243110589    | 1.69737822   | 0.010204716 | 0.282373835 | Up         |
| ENSRNOT00000085640 | 45.88836672 | 0.548612216   | 3.361378276  | 3.590272092    | 1.844093184  | 0.000775545 | 0.100775184 | Up         |
| ENSRNOT00000085889 | 3.692568709 | 0.947743057   | -2.028604446 | 0.263779476    | -1.922595778 | 0.042498595 | 0.479676769 | Down       |
| ENSRNOT00000086616 | 131.5129263 | 0.505265823   | 2.858562137  | 2.721371192    | 1.444333752  | 0.004255658 | 0.225210841 | Up         |
| ENSRNOT00000086642 | 5.763594292 | 1.121503183   | 2.566966859  | 7.355694203    | 2.878861504  | 0.010259242 | 0.282373835 | Up         |
| ENSRNOT00000086824 | 174.788883  | 0.751953418   | -2.428207021 | 0.282065365    | -1.82589857  | 0.015173679 | 0.33359834  | Down       |
| ENSRNOT00000087170 | 10.16283704 | 0.887558632   | 1.993995617  | 3.410038489    | 1.769788023  | 0.046152533 | 0.4878112   | Up         |
| ENSRNOT00000087238 | 2.851344972 | 2.180330846   | 2.255326189  | 30.21843952    | 4.917357257  | 0.024112862 | 0.374216708 | Up         |
| ENSRNOT00000088428 | 34.69046918 | 1.022075555   | -2.356712173 | 0.188320518    | -2.408737901 | 0.018437531 | 0.353413045 | Down       |

|                    |             |             |              |             |              |             |             |      |
|--------------------|-------------|-------------|--------------|-------------|--------------|-------------|-------------|------|
| ENSRNOT00000088632 | 12.15219272 | 0.546601549 | -2.083467089 | 0.454128871 | -1.138826337 | 0.037208669 | 0.445533362 | Down |
| ENSRNOT00000088764 | 3.912363879 | 1.907852619 | 2.816215253  | 41.43918279 | 5.372923647  | 0.00485931  | 0.229063584 | Up   |
| ENSRNOT00000088970 | 4.23895945  | 1.064694834 | 2.443989827  | 6.071711921 | 2.602103342  | 0.014525836 | 0.33198467  | Up   |
| ENSRNOT00000089661 | 8.588418314 | 1.300892172 | 2.006293073  | 6.104913921 | 2.609970953  | 0.044824989 | 0.486763772 | Up   |
| ENSRNOT00000089756 | 2.142877932 | 2.332775283 | -1.985677069 | 0.040326209 | -4.632138387 | 0.047069193 | 0.492241161 | Down |
| ENSRNOT00000089772 | 3.038789637 | 1.080357863 | 3.206746152  | 11.03820303 | 3.464433422  | 0.001342454 | 0.119411276 | Up   |
| ENSRNOT00000089868 | 15.28150746 | 1.300663447 | 3.258373893  | 18.87033095 | 4.23804782   | 0.001120527 | 0.116700014 | Up   |
| ENSRNOT00000090606 | 15.21087254 | 0.731177691 | -2.842756255 | 0.23675061  | -2.078559955 | 0.004472526 | 0.226006179 | Down |
| ENSRNOT00000090633 | 27.76444948 | 0.653473266 | 2.687613254  | 3.378267129 | 1.756283411  | 0.007196469 | 0.252138319 | Up   |
| ENSRNOT00000091021 | 2.301316377 | 1.163616442 | 2.568752016  | 7.939466573 | 2.989042081  | 0.010206547 | 0.282373835 | Up   |
| ENSRNOT00000091594 | 18.82474487 | 0.627354646 | -2.118904957 | 0.397959944 | -1.329304868 | 0.0340985   | 0.433751819 | Down |
| ENSRNOT00000092074 | 3.734554845 | 0.895955249 | 2.49899268   | 4.720650283 | 2.238985609  | 0.012454688 | 0.309010917 | Up   |
| ENSRNOT00000092132 | 3.272656324 | 0.873558638 | 2.440933286  | 4.384153637 | 2.132298357  | 0.014649361 | 0.332661323 | Up   |
| ENSRNOT00000092405 | 5.940256075 | 0.714401984 | 2.014833531  | 2.712082514 | 1.439401072  | 0.043922094 | 0.485788948 | Up   |
| ENSRNOT00000092488 | 21.84984559 | 1.286249332 | 3.048762889  | 15.15234554 | 3.921469231  | 0.002297858 | 0.158809192 | Up   |
| ENSRNOT00000092666 | 5.725935652 | 1.534717185 | 2.686865333  | 17.43093918 | 4.123578399  | 0.007212603 | 0.252138319 | Up   |
| ENSRNOT00000093328 | 22.61268537 | 0.884399015 | -3.401087194 | 0.124315823 | -3.007918164 | 0.000671184 | 0.098993882 | Down |
| ENSRNOT00000093582 | 157.1918044 | 0.47867721  | -3.529188601 | 0.310068279 | -1.689342154 | 0.000416836 | 0.079252114 | Down |
| ENSRNOT00000093623 | 22.12946534 | 1.154902652 | -2.836238402 | 0.10326482  | -3.275579253 | 0.004564836 | 0.228573774 | Down |
| NR_002154.1        | 8.459188884 | 0.432871585 | 2.423540597  | 2.069212568 | 1.049081859  | 0.015370035 | 0.33359834  | Up   |
| NR_110711.1        | 3.78502995  | 2.105401201 | -2.347378325 | 0.032528021 | -4.942173145 | 0.018906047 | 0.355407874 | Down |
| NR_110712.1        | 4.775105272 | 1.208409434 | 2.816393176  | 10.58064802 | 3.403356084  | 0.004856619 | 0.229063584 | Up   |
| NR_111959.1        | 31.60979888 | 1.117857686 | 2.830686742  | 8.965008369 | 3.16430493   | 0.004644819 | 0.229063584 | Up   |
| NR_126572.1        | 3.986574315 | 1.940306714 | 2.257162191  | 20.81550933 | 4.379586955  | 0.023997942 | 0.374216708 | Up   |
| NR_131064.1        | 267.6054469 | 0.581871504 | 3.426995155  | 3.983594574 | 1.994070826  | 0.0006103   | 0.098993882 | Up   |
| TCONS_00000126     | 945.8032867 | 0.544144499 | -2.597686284 | 0.37539551  | -1.413516702 | 0.00938542  | 0.280950498 | Down |
| TCONS_00000159     | 1749.880595 | 0.764493462 | -2.310471322 | 0.293953483 | -1.766340221 | 0.020862074 | 0.359088457 | Down |
| TCONS_00000452     | 241.2148466 | 0.376416646 | 4.020575447  | 2.85484323  | 1.513411524  | 5.81E-05    | 0.024597945 | Up   |
| TCONS_00000950     | 136.8732657 | 0.549944131 | 4.157402861  | 4.878167529 | 2.286339305  | 3.22E-05    | 0.016117713 | Up   |
| TCONS_00001909     | 32.90757826 | 0.330753024 | 4.565625599  | 2.848286904 | 1.510094474  | 4.98E-06    | 0.004571703 | Up   |
| TCONS_00002327     | 9348.873221 | 0.801167097 | -1.983194576 | 0.332431675 | -1.588870241 | 0.0473457   | 0.492241161 | Down |
| TCONS_00002689     | 222.3486455 | 0.498371129 | 2.493871987  | 2.366695003 | 1.242873798  | 0.012635811 | 0.310705557 | Up   |

|                |             |             |              |             |              |             |             |      |
|----------------|-------------|-------------|--------------|-------------|--------------|-------------|-------------|------|
| TCONS_00003377 | 27.78610663 | 0.462815305 | 2.706007679  | 2.382344037 | 1.25238177   | 0.006809747 | 0.249082101 | Up   |
| TCONS_00004482 | 53.0266906  | 0.847238545 | -2.113295877 | 0.289078712 | -1.790465724 | 0.034575451 | 0.43779675  | Down |
| TCONS_00005300 | 18.20666573 | 1.469137527 | 5.167151735  | 192.8394649 | 7.591256521  | 2.38E-07    | 0.000436396 | Up   |
| TCONS_00005319 | 83.35271761 | 0.588317314 | 2.771572004  | 3.096339785 | 1.630563798  | 0.005578633 | 0.239822186 | Up   |
| TCONS_00006191 | 18.85540565 | 0.533084448 | 4.320648782  | 4.93575461  | 2.30327067   | 1.56E-05    | 0.010711072 | Up   |
| TCONS_00006192 | 7.100971304 | 1.099424517 | 2.312068517  | 5.823735415 | 2.541944812  | 0.020773908 | 0.359088457 | Up   |
| TCONS_00006937 | 8.842638011 | 1.138428603 | -2.610329455 | 0.127478538 | -2.971673715 | 0.009045506 | 0.276120403 | Down |
| TCONS_00007366 | 105.6760693 | 0.364985576 | -2.742588708 | 0.499651704 | -1.001005319 | 0.006095698 | 0.239822186 | Down |
| TCONS_00008081 | 82.41266646 | 0.607029133 | 3.103815516  | 3.6912423   | 1.884106442  | 0.001910424 | 0.144145427 | Up   |
| TCONS_00008085 | 221.2899705 | 0.650857841 | 2.699317161  | 3.379645064 | 1.75687174   | 0.006948192 | 0.249082101 | Up   |
| TCONS_00010256 | 87.18409581 | 0.277802738 | -3.71196113  | 0.489305374 | -1.031192967 | 0.00020566  | 0.059619629 | Down |
| TCONS_00011130 | 103.7189159 | 0.888894788 | -2.192111046 | 0.259075396 | -1.948556083 | 0.028371489 | 0.409084197 | Down |
| TCONS_00011201 | 98.20380696 | 2.922629386 | -3.201779452 | 0.001524324 | -9.357614714 | 0.001365815 | 0.119411276 | Down |
| TCONS_00011370 | 203.5437941 | 0.546992864 | 3.958046168  | 4.484735839 | 2.16502301   | 7.56E-05    | 0.027361676 | Up   |
| TCONS_00012245 | 1043.652601 | 0.446093263 | -2.270479112 | 0.495567872 | -1.012845435 | 0.023178529 | 0.368504563 | Down |
| TCONS_00012248 | 342.7099257 | 0.423631765 | -2.374385624 | 0.497971412 | -1.005865174 | 0.017578181 | 0.348730667 | Down |
| TCONS_00012430 | 53.52864834 | 0.785195688 | -2.049769026 | 0.327718768 | -1.609469801 | 0.040386976 | 0.466355264 | Down |
| TCONS_00012758 | 6.176236655 | 0.532592315 | 2.241932292  | 2.287918894 | 1.19403591   | 0.024965749 | 0.378819128 | Up   |
| TCONS_00012987 | 243.1280245 | 0.346810174 | 3.390100941  | 2.259058292 | 1.175721498  | 0.000698669 | 0.098993882 | Up   |
| TCONS_00013066 | 302.2276718 | 0.418044296 | -2.419794836 | 0.49600225  | -1.011581429 | 0.015529266 | 0.334498044 | Down |
| TCONS_00013841 | 112.0436489 | 0.707169377 | -2.313964464 | 0.321665963 | -1.636364808 | 0.020669671 | 0.359088457 | Down |
| TCONS_00014105 | 100.3264212 | 1.707466086 | -2.095808365 | 0.0837062   | -3.578521706 | 0.036099194 | 0.439894428 | Down |
| TCONS_00015113 | 523.3946426 | 0.446530475 | -3.040573227 | 0.390201544 | -1.357708609 | 0.002361283 | 0.158809192 | Down |
| TCONS_00015429 | 51.38628178 | 0.394519065 | 2.582130265  | 2.026091904 | 1.018699617  | 0.009819251 | 0.282373835 | Up   |
| TCONS_00015431 | 47.1532872  | 0.590262941 | 2.940444257  | 3.330261059 | 1.735635275  | 0.00327742  | 0.188041953 | Up   |
| TCONS_00015433 | 128.9656457 | 0.494317816 | 3.400299055  | 3.206119955 | 1.680828404  | 0.000673122 | 0.098993882 | Up   |
| TCONS_00015434 | 142.5969674 | 0.562823083 | 3.205942097  | 3.492785907 | 1.804378214  | 0.001346211 | 0.119411276 | Up   |
| TCONS_00016417 | 100.997033  | 0.44580542  | -2.747239765 | 0.427876284 | -1.224734377 | 0.006009918 | 0.239822186 | Down |
| TCONS_00016418 | 3.380630922 | 1.410074583 | 2.235486572  | 8.890119403 | 3.152202796  | 0.025385422 | 0.382029797 | Up   |
| TCONS_00016420 | 9.75699435  | 1.365967633 | 2.78802883   | 14.00972899 | 3.808357143  | 0.005302982 | 0.23747014  | Up   |
| TCONS_00016572 | 30.89811388 | 0.563907075 | -1.967654448 | 0.463430768 | -1.109574265 | 0.04910781  | 0.498132265 | Down |
| TCONS_00016625 | 26.29707626 | 0.934240297 | -3.377972409 | 0.112201359 | -3.155837948 | 0.000730224 | 0.098993882 | Down |

|                |             |             |              |             |              |             |             |      |
|----------------|-------------|-------------|--------------|-------------|--------------|-------------|-------------|------|
| TCONS_00016626 | 26.29707626 | 0.934240297 | -3.377972409 | 0.112201359 | -3.155837948 | 0.000730224 | 0.098993882 | Down |
| TCONS_00016627 | 26.29707626 | 0.934240297 | -3.377972409 | 0.112201359 | -3.155837948 | 0.000730224 | 0.098993882 | Down |
| TCONS_00017543 | 16.55057204 | 1.158974492 | -2.35759002  | 0.150476834 | -2.732386695 | 0.018393995 | 0.353413045 | Down |
| TCONS_00017566 | 883.6711267 | 0.394756778 | -2.819281753 | 0.462353886 | -1.11293058  | 0.004813125 | 0.229063584 | Down |
| TCONS_00018620 | 146.2287391 | 0.305366187 | 4.200222376  | 2.43278005  | 1.282605891  | 2.67E-05    | 0.014687245 | Up   |
| TCONS_00019834 | 5311.970048 | 0.426742057 | -2.629071031 | 0.459477085 | -1.121935181 | 0.008561848 | 0.272593388 | Down |
| TCONS_00019835 | 5405.727574 | 0.431213797 | -2.380044631 | 0.490964942 | -1.026308084 | 0.017310541 | 0.345458194 | Down |
| TCONS_00020441 | 706.5272407 | 0.351856759 | 3.948646895  | 2.619620998 | 1.389358101  | 7.86E-05    | 0.027361676 | Up   |
| TCONS_00020891 | 10.85271092 | 0.860949398 | 2.815791078  | 5.367512457 | 2.424253634  | 0.00486573  | 0.229063584 | Up   |
| TCONS_00022271 | 366.8932786 | 0.656804367 | -2.402304893 | 0.334982041 | -1.577844343 | 0.016292123 | 0.338108291 | Down |
| TCONS_00023674 | 50.24634759 | 0.331038731 | -3.172175935 | 0.482930305 | -1.050113096 | 0.001513013 | 0.127987302 | Down |
| TCONS_00023889 | 16.85503579 | 1.585724361 | 2.665512595  | 18.72337046 | 4.226768258  | 0.007687105 | 0.257061902 | Up   |
| TCONS_00024216 | 37.06939084 | 0.799354744 | -2.945496479 | 0.195535629 | -2.354496585 | 0.003224368 | 0.188041953 | Down |
| TCONS_00024570 | 203.6849505 | 0.323025824 | -3.561635143 | 0.450469044 | -1.150500128 | 0.000368552 | 0.07552552  | Down |
| TCONS_00024571 | 92.61257477 | 0.481958843 | -2.505947874 | 0.432939177 | -1.207763738 | 0.012212362 | 0.307149275 | Down |
| TCONS_00024579 | 3815.867281 | 0.309007075 | -3.564359094 | 0.466060071 | -1.101412176 | 0.000364746 | 0.07552552  | Down |
| TCONS_00024580 | 332.7269503 | 0.264539678 | -4.838809173 | 0.411779233 | -1.280057022 | 1.31E-06    | 0.001798629 | Down |
| TCONS_00024614 | 56.31245248 | 0.43775836  | -2.677892368 | 0.443722689 | -1.172269771 | 0.007408702 | 0.252138319 | Down |
| TCONS_00024712 | 2.76797833  | 0.794134557 | -2.506812668 | 0.251608651 | -1.990746568 | 0.012182526 | 0.307149275 | Down |
| TCONS_00024948 | 51.72778559 | 1.004188407 | -1.981187597 | 0.251828659 | -1.989485616 | 0.04757024  | 0.493440452 | Down |
| TCONS_00025793 | 26.58608091 | 0.937059458 | -2.432261868 | 0.206015675 | -2.279173986 | 0.015004855 | 0.33359834  | Down |
| TCONS_00026209 | 2407.383817 | 2.273674812 | -4.415121318 | 0.000950813 | -10.03855013 | 1.01E-05    | 0.007943587 | Down |
| TCONS_00026210 | 7.625158579 | 1.110292293 | -2.569374916 | 0.138431372 | -2.852757168 | 0.010188217 | 0.282373835 | Down |
| TCONS_00026211 | 36.26532594 | 1.1958958   | -2.653059988 | 0.110891194 | -3.172783296 | 0.007976569 | 0.263083497 | Down |
| TCONS_00026884 | 61.93870814 | 0.698489855 | -3.333965713 | 0.199057726 | -2.328741227 | 0.000856172 | 0.104795466 | Down |
| TCONS_00027359 | 6.390357653 | 0.987563634 | 2.183232209  | 4.457024016 | 2.156080735  | 0.029018714 | 0.412322556 | Up   |
| TCONS_00027363 | 17.77987137 | 0.550050215 | -2.68455476  | 0.359324715 | -1.476639924 | 0.007262648 | 0.252138319 | Down |
| TCONS_00028341 | 12.12910784 | 1.136539087 | -2.766900932 | 0.113071633 | -3.144691059 | 0.005659195 | 0.239822186 | Down |
| TCONS_00028342 | 911.8705609 | 1.528636648 | -3.040193527 | 0.039903214 | -4.647351242 | 0.002364262 | 0.158809192 | Down |
| TCONS_00028343 | 1011.614771 | 0.826766913 | -2.522620611 | 0.235594987 | -2.085619255 | 0.0116484   | 0.298415746 | Down |
| TCONS_00028344 | 1056.330144 | 1.233248795 | -3.210118086 | 0.064307274 | -3.958874261 | 0.001326805 | 0.119411276 | Down |
| TCONS_00028346 | 35.23059053 | 3.004028179 | -2.610730903 | 0.004356215 | -7.8427092   | 0.009034896 | 0.276120403 | Down |

|                |             |             |              |             |              |             |             |      |
|----------------|-------------|-------------|--------------|-------------|--------------|-------------|-------------|------|
| TCONS_00028347 | 297.9888071 | 1.488773578 | -3.648547294 | 0.023165782 | -5.431860808 | 0.000263727 | 0.067015068 | Down |
| TCONS_00028348 | 9.387255454 | 3.006359757 | -7.271734577 | 2.62E-07    | -21.8614502  | 3.55E-13    | 1.95E-09    | Down |
| TCONS_00028663 | 2.359254383 | 0.846926708 | -2.386337533 | 0.246378285 | -2.02105299  | 0.017017125 | 0.343334512 | Down |
| TCONS_00028840 | 22.50678259 | 2.466319969 | -2.334878101 | 0.018471483 | -5.758556484 | 0.01954979  | 0.35694427  | Down |
| TCONS_00028861 | 333.7295133 | 0.610253769 | 2.77840813   | 3.238967592 | 1.695534033  | 0.005462596 | 0.239822186 | Up   |
| TCONS_00028862 | 190.6245329 | 0.603384496 | 3.019576882  | 3.535626495 | 1.821965876  | 0.00253128  | 0.160256235 | Up   |
| TCONS_00029515 | 8.413038587 | 0.459300717 | -2.752043411 | 0.416383409 | -1.264015511 | 0.005922467 | 0.239822186 | Down |
| TCONS_00029593 | 195.8545461 | 0.577982411 | 2.015069779  | 2.241826906 | 1.16467489   | 0.043897338 | 0.485788948 | Up   |
| TCONS_00031050 | 232.7394638 | 1.250509738 | -3.279637364 | 0.058265332 | -4.101218461 | 0.001039406 | 0.114500961 | Down |
| TCONS_00032747 | 9.942224918 | 1.395260085 | -2.182872041 | 0.121104617 | -3.04567423  | 0.029045234 | 0.412322556 | Down |
| TCONS_00033559 | 870.628192  | 0.371815099 | 4.034619251  | 2.828686624 | 1.500132357  | 5.47E-05    | 0.024597945 | Up   |
| TCONS_00033586 | 124.9818486 | 0.365582796 | -3.207737288 | 0.443592363 | -1.172693566 | 0.001337836 | 0.119411276 | Down |
| TCONS_00033882 | 36.38759836 | 0.51264753  | -3.259393933 | 0.314052956 | -1.670920247 | 0.001116505 | 0.116700014 | Down |
| TCONS_00035829 | 20.30842026 | 1.137934866 | 2.372577396  | 6.497291992 | 2.699838542  | 0.017664462 | 0.348730667 | Up   |
| TCONS_00036407 | 142.01451   | 0.744930535 | -2.749628637 | 0.241771763 | -2.048282333 | 0.005966284 | 0.239822186 | Down |
| XR_001835611.1 | 22.39656689 | 0.512411839 | 3.162415907  | 3.074729195 | 1.620459352  | 0.001564659 | 0.128628997 | Up   |
| XR_001835620.1 | 57.69600118 | 0.862285364 | 3.122097579  | 6.462709073 | 2.692139048  | 0.001795674 | 0.139303845 | Up   |
| XR_001835727.1 | 1.53280386  | 1.446475886 | 2.398263388  | 11.07342922 | 3.46903016   | 0.016473015 | 0.338557345 | Up   |
| XR_001835750.1 | 2.16740453  | 1.16635598  | 2.203492633  | 5.938328115 | 2.57005681   | 0.027560046 | 0.40372535  | Up   |
| XR_001835791.1 | 2.085896525 | 1.673141886 | 2.351864788  | 15.29516205 | 3.935003487  | 0.018679564 | 0.355020219 | Up   |
| XR_001835889.1 | 3.69502165  | 1.83519933  | -2.394476247 | 0.047552295 | -4.394341205 | 0.016644121 | 0.339211229 | Down |
| XR_001835895.1 | 26.51827743 | 0.790884945 | 6.406764633  | 33.52147432 | 5.067013697  | 1.49E-10    | 4.09E-07    | Up   |
| XR_001835898.1 | 6.203016426 | 0.959122994 | 2.134217935  | 4.132393093 | 2.046977497  | 0.032824945 | 0.429523977 | Up   |
| XR_001835902.1 | 5.817729162 | 0.61387382  | -2.032250136 | 0.421164238 | -1.247545154 | 0.04212834  | 0.476474117 | Down |
| XR_001835948.1 | 6.226972915 | 0.643294439 | 2.703728456  | 3.338716235 | 1.739293481  | 0.00685663  | 0.249082101 | Up   |
| XR_001835987.1 | 3.362039749 | 1.697326792 | 2.736323416  | 25.01003282 | 4.644435046  | 0.006212993 | 0.241169082 | Up   |
| XR_001836039.1 | 4.178045925 | 1.568920333 | -3.564422239 | 0.020727723 | -5.592294525 | 0.000364659 | 0.07552552  | Down |
| XR_001836116.1 | 22.38912329 | 0.498379111 | 2.557358035  | 2.419206337 | 1.274533824  | 0.01054706  | 0.283173669 | Up   |
| XR_001836139.1 | 3.079188532 | 1.155933844 | 2.309142087  | 6.36083202  | 2.669215488  | 0.020935698 | 0.359171341 | Up   |
| XR_001836311.1 | 11.80781934 | 0.691699144 | 2.874103599  | 3.966908164 | 1.988014999  | 0.00405176  | 0.220961346 | Up   |
| XR_001836327.1 | 1.542621452 | 1.324458399 | 2.612674195  | 11.00722032 | 3.460378282  | 0.00898369  | 0.276120403 | Up   |
| XR_001836331.1 | 8.437099615 | 0.629655482 | 2.105209233  | 2.50629552  | 1.325556534  | 0.035273099 | 0.438561098 | Up   |

|                |             |             |              |             |              |             |             |      |
|----------------|-------------|-------------|--------------|-------------|--------------|-------------|-------------|------|
| XR_001836575.1 | 54.42517341 | 0.393349841 | 2.736084619  | 2.108531318 | 1.07623845   | 0.006217504 | 0.241169082 | Up   |
| XR_001836576.1 | 6.283554194 | 1.624544455 | -2.586903373 | 0.054313719 | -4.20253953  | 0.009684275 | 0.282373835 | Down |
| XR_001836579.1 | 4.685270399 | 0.991920217 | -2.684041632 | 0.157961496 | -2.662355157 | 0.007273805 | 0.252138319 | Down |
| XR_001836697.1 | 2.268850756 | 1.684505988 | 2.405135873  | 16.58107663 | 4.05146578   | 0.016166454 | 0.338108291 | Up   |
| XR_001836836.1 | 5.819371461 | 0.925176739 | 2.357422454  | 4.534779547 | 2.181032418  | 0.018402298 | 0.353413045 | Up   |
| XR_001836845.1 | 7.989511419 | 1.155083253 | 3.042059686  | 11.42270316 | 3.513832197  | 0.002349653 | 0.158809192 | Up   |
| XR_001836858.1 | 1.754773195 | 1.131096805 | -1.984303317 | 0.211035975 | -2.244439143 | 0.047222037 | 0.492241161 | Down |
| XR_001836927.1 | 4.83042016  | 0.720926588 | 2.160804158  | 2.944007135 | 1.557781168  | 0.030710471 | 0.419373013 | Up   |
| XR_001836989.1 | 2.851018568 | 1.034149675 | -2.001278106 | 0.238222056 | -2.069621104 | 0.045362428 | 0.4878112   | Down |
| XR_001836995.1 | 6.007709812 | 0.870041207 | 2.869423833  | 5.643213665 | 2.496516974  | 0.004112204 | 0.222058994 | Up   |
| XR_001837055.1 | 6.714771844 | 0.923900835 | -2.565440415 | 0.193417127 | -2.370212541 | 0.010304492 | 0.282373835 | Down |
| XR_001837060.1 | 26.03737367 | 0.897904408 | -2.332068583 | 0.234234476 | -2.093974661 | 0.019697083 | 0.35694427  | Down |
| XR_001837164.1 | 2.066049915 | 1.10538083  | -2.267347597 | 0.176008552 | -2.506282569 | 0.023369    | 0.368504563 | Down |
| XR_001837208.1 | 8.976399171 | 1.030884947 | -2.403786065 | 0.179489721 | -2.478026871 | 0.016226266 | 0.338108291 | Down |
| XR_001837258.1 | 15.90996779 | 0.522789317 | 2.051522727  | 2.103095212 | 1.072514166  | 0.040216069 | 0.466337067 | Up   |
| XR_001837261.1 | 2.94323269  | 0.73355518  | 2.159179408  | 2.997744112 | 1.58387724   | 0.030836251 | 0.419373013 | Up   |
| XR_001837265.1 | 12.09942178 | 0.902973113 | 2.14672958   | 3.832907261 | 1.938439092  | 0.031814816 | 0.425330119 | Up   |
| XR_001837389.1 | 2.298874509 | 1.333598083 | 3.055253347  | 16.84770304 | 4.074480008  | 0.002248705 | 0.158793155 | Up   |
| XR_001837494.1 | 1.214520776 | 1.20766343  | -2.182899968 | 0.160850412 | -2.636208463 | 0.029043177 | 0.412322556 | Down |
| XR_001837574.1 | 13.13006219 | 0.994761137 | 3.126706363  | 8.63577693  | 3.110325978  | 0.001767764 | 0.139097766 | Up   |
| XR_001837575.1 | 164.9018091 | 0.691666528 | 3.085258167  | 4.389235882 | 2.133969804  | 0.002033755 | 0.149358995 | Up   |
| XR_001837581.1 | 10.5699494  | 0.775454702 | -2.224653863 | 0.302473719 | -1.725118299 | 0.026104484 | 0.391017319 | Down |
| XR_001837617.1 | 11.22183847 | 0.898367418 | -2.00564655  | 0.286815021 | -1.801807512 | 0.044893972 | 0.486763772 | Down |
| XR_001837728.1 | 5.174447253 | 1.074723544 | -2.102915463 | 0.208764345 | -2.26005276  | 0.03547316  | 0.438561098 | Down |
| XR_001837746.1 | 2.913191024 | 1.247247326 | 2.292919022  | 7.25933361  | 2.859837118  | 0.021852667 | 0.363208992 | Up   |
| XR_001837768.1 | 1.643767069 | 1.534194932 | -2.401491329 | 0.077785452 | -3.684355826 | 0.016328396 | 0.338108291 | Down |
| XR_001837769.1 | 1.643767069 | 1.534194932 | -2.401491329 | 0.077785452 | -3.684355826 | 0.016328396 | 0.338108291 | Down |
| XR_001837912.1 | 5.220310833 | 1.231178056 | 3.088670504  | 13.95493353 | 3.802703348  | 0.002010543 | 0.149358995 | Up   |
| XR_001837919.1 | 11.39662337 | 0.85248786  | -2.451984787 | 0.234833923 | -2.090287265 | 0.014207067 | 0.327416419 | Down |
| XR_001838016.1 | 23.06666028 | 0.703717008 | 2.850382284  | 4.016287351 | 2.005862493  | 0.004366671 | 0.226006179 | Up   |
| XR_001838047.1 | 4.724363498 | 1.915767775 | -2.021457275 | 0.068268189 | -3.872642705 | 0.043232451 | 0.484562615 | Down |
| XR_001838100.1 | 8.114606783 | 1.316653559 | -2.425499888 | 0.109306943 | -3.193543058 | 0.01528732  | 0.33359834  | Down |



|                |             |             |              |             |              |             |             |      |
|----------------|-------------|-------------|--------------|-------------|--------------|-------------|-------------|------|
| XR_001838140.1 | 14.72906711 | 0.706468763 | 2.297827483  | 3.08088181  | 1.623343338  | 0.02157161  | 0.361571443 | Up   |
| XR_001838236.1 | 35.32069586 | 0.853616047 | 2.563187379  | 4.556663637 | 2.187977878  | 0.010371606 | 0.282805961 | Up   |
| XR_001838289.1 | 29.6087735  | 0.548670187 | 3.241136353  | 3.430252766 | 1.778314889  | 0.001190542 | 0.117098332 | Up   |
| XR_001838290.1 | 13.44385818 | 0.897318285 | 2.050571151  | 3.58013748  | 1.840014989  | 0.040308728 | 0.466355264 | Up   |
| XR_001838455.1 | 60.82081675 | 0.550225865 | -2.054248455 | 0.456820521 | -1.130300633 | 0.039951651 | 0.464248296 | Down |
| XR_001838482.1 | 1.192157008 | 1.533032831 | 2.383136628  | 12.58319773 | 3.653426692  | 0.017165822 | 0.345070612 | Up   |
| XR_001838561.1 | 3.423145192 | 1.837771572 | -2.327341055 | 0.051577254 | -4.277121228 | 0.01994712  | 0.35694427  | Down |
| XR_001838727.1 | 1.414820172 | 1.199873165 | 2.296229247  | 6.751386695 | 2.755183854  | 0.021662777 | 0.361571443 | Up   |
| XR_001838936.1 | 4.036862551 | 0.971446618 | -2.556728588 | 0.178782156 | -2.483725341 | 0.010566162 | 0.283173669 | Down |
| XR_001839007.1 | 11.90913589 | 1.208408281 | -2.503854718 | 0.122794787 | -3.025678775 | 0.012284847 | 0.307190915 | Down |
| XR_001839049.1 | 5.095701453 | 0.716614139 | -2.829703737 | 0.245227774 | -2.027805707 | 0.004659113 | 0.229063584 | Down |
| XR_001839409.1 | 5.267256688 | 1.008918829 | 2.855771863  | 7.367841383 | 2.881242003  | 0.004293235 | 0.225210841 | Up   |
| XR_001839598.1 | 2.716593727 | 1.197203321 | 2.394072176  | 7.291376298 | 2.866191159  | 0.01666247  | 0.339211229 | Up   |
| XR_001839825.1 | 6.726378136 | 0.73240231  | 2.111094612  | 2.920409284 | 1.546170571  | 0.03476418  | 0.438457135 | Up   |
| XR_001839830.1 | 11.46499333 | 0.581360785 | 2.017652708  | 2.254776072 | 1.172984163  | 0.043627443 | 0.484634362 | Up   |
| XR_001839910.1 | 11.10719372 | 0.493597402 | 2.457809643  | 2.3184626   | 1.213168454  | 0.013978725 | 0.324941417 | Up   |
| XR_001839958.1 | 208.9575721 | 0.544469258 | 3.322507362  | 3.504000835 | 1.809003119  | 0.000892123 | 0.104862381 | Up   |
| XR_001840189.1 | 6.322211253 | 0.561681275 | 2.29222312   | 2.441044854 | 1.287498804  | 0.021892771 | 0.363208992 | Up   |
| XR_001840200.1 | 5.026179649 | 1.198694357 | 2.357066602  | 7.088117087 | 2.825402436  | 0.018419943 | 0.353413045 | Up   |
| XR_001840305.1 | 6.733722037 | 1.179011778 | 2.589108589  | 8.296998482 | 3.052589522  | 0.009622475 | 0.282373835 | Up   |
| XR_001840306.1 | 1.552435784 | 1.689551094 | 2.069983827  | 11.29289475 | 3.49734344   | 0.038453859 | 0.452636929 | Up   |
| XR_001840348.1 | 13.14372745 | 0.336250229 | 3.022763501  | 2.022871841 | 1.016404921  | 0.002504779 | 0.160256235 | Up   |
| XR_001840608.1 | 25.52621604 | 0.616852953 | 2.728637144  | 3.21132322  | 1.68316788   | 0.006359664 | 0.242279811 | Up   |
| XR_001840622.1 | 1.424764962 | 1.107023301 | -2.125769066 | 0.195701146 | -2.353275889 | 0.033522493 | 0.430400679 | Down |
| XR_001840623.1 | 2.572642307 | 0.926825208 | 2.547304234  | 5.136927729 | 2.360905777  | 0.010855874 | 0.283596049 | Up   |
| XR_001840746.1 | 2.672810939 | 1.364610264 | 3.156190303  | 19.79370369 | 4.306969682  | 0.001598445 | 0.129474072 | Up   |
| XR_001840753.1 | 3.542417324 | 0.792859068 | -2.820299012 | 0.2122594   | -2.236099646 | 0.004797892 | 0.229063584 | Down |
| XR_001840965.1 | 5.261545761 | 0.871097161 | 2.127403273  | 3.612944145 | 1.853174951  | 0.03338659  | 0.430400679 | Up   |
| XR_001841107.1 | 4.721674614 | 1.004839383 | 2.036227564  | 4.129827863 | 2.046081649  | 0.04172751  | 0.474823035 | Up   |
| XR_001841151.1 | 5.108816451 | 0.692903867 | -2.743784604 | 0.267724493 | -1.901178963 | 0.006073538 | 0.239822186 | Down |
| XR_001841203.1 | 40.94765825 | 0.622491941 | 2.128246563  | 2.505009951 | 1.324816334  | 0.033316646 | 0.430400679 | Up   |
| XR_001841211.1 | 6.982291168 | 0.695473377 | 2.00319327   | 2.626547341 | 1.393167588  | 0.045156548 | 0.4878112   | Up   |

|                |             |             |              |             |              |             |             |      |
|----------------|-------------|-------------|--------------|-------------|--------------|-------------|-------------|------|
| XR_001841336.1 | 5.888450908 | 0.709139212 | 2.407788078  | 3.2658464   | 1.707456939  | 0.016049494 | 0.338108291 | Up   |
| XR_001841394.1 | 17.16991328 | 0.818709951 | 3.50897316   | 7.325012621 | 2.872831245  | 0.00044984  | 0.079926463 | Up   |
| XR_001841497.1 | 7.009641044 | 1.683727753 | -2.09565587  | 0.086658559 | -3.528513948 | 0.036112729 | 0.439894428 | Down |
| XR_001841607.1 | 14.81166952 | 0.850891424 | -2.899679034 | 0.180827748 | -2.467312022 | 0.00373545  | 0.207826827 | Down |
| XR_001841624.1 | 6.684830446 | 1.18393108  | 2.489443505  | 7.713200093 | 2.947329537  | 0.012794325 | 0.311819215 | Up   |
| XR_001841625.1 | 2.469216697 | 1.741231482 | 2.089125636  | 12.44635441 | 3.637651328  | 0.036696415 | 0.443254068 | Up   |
| XR_001841893.1 | 6.427543516 | 0.946298224 | -2.743854375 | 0.1653386   | -2.596504523 | 0.006072247 | 0.239822186 | Down |
| XR_001841894.1 | 5.035892584 | 0.898140146 | -2.770479648 | 0.178218746 | -2.488278997 | 0.00559738  | 0.239822186 | Down |
| XR_001841959.1 | 27.79104191 | 1.031429271 | -1.960289032 | 0.246233765 | -2.021899486 | 0.049962017 | 0.503458779 | Down |
| XR_001841964.1 | 1.072876244 | 1.355894462 | 2.589801254  | 11.40423034 | 3.511497178  | 0.009603136 | 0.282373835 | Up   |
| XR_001842112.1 | 0.978192454 | 1.655558991 | 2.041694283  | 10.4117836  | 3.380145327  | 0.041181866 | 0.470957138 | Up   |
| XR_001842121.1 | 4.324525173 | 0.754910445 | 2.297437811  | 3.327318105 | 1.7343598    | 0.021593807 | 0.361571443 | Up   |
| XR_001842218.1 | 4.097539498 | 1.003251913 | 2.617910807  | 6.174935318 | 2.626424025  | 0.008846993 | 0.275306415 | Up   |
| XR_001842258.1 | 3.22712223  | 2.119454082 | -1.976005597 | 0.054861842 | -4.188053129 | 0.048154143 | 0.49458484  | Down |
| XR_001842362.1 | 1.845550962 | 0.975435638 | -1.975430379 | 0.262992727 | -1.926905192 | 0.048219328 | 0.49458484  | Down |
| XR_001842375.1 | 1.721336796 | 1.317872815 | 2.327427365  | 8.381760238 | 3.067253253  | 0.019942531 | 0.35694427  | Up   |
| XR_001842378.1 | 26.05563089 | 0.783276403 | 3.64454562   | 7.233463426 | 2.854686584  | 0.000267865 | 0.067015068 | Up   |
| XR_001842385.1 | 18.96473655 | 0.845221496 | 3.019581076  | 5.865340378 | 2.552214833  | 0.002531245 | 0.160256235 | Up   |
| XR_001842388.1 | 6.120643157 | 1.055267887 | 1.998697104  | 4.314402781 | 2.109160869  | 0.045641137 | 0.4878112   | Up   |
| XR_001842390.1 | 2.974130881 | 1.40895082  | 3.168246004  | 22.06828793 | 4.463902804  | 0.001533617 | 0.127987302 | Up   |
| XR_001842392.1 | 9.669412374 | 1.432645272 | 2.629742633  | 13.61842871 | 3.76748835   | 0.008544953 | 0.272593388 | Up   |
| XR_001842395.1 | 3.390370597 | 1.608509377 | 3.212989546  | 35.95508248 | 5.168123814  | 0.001313611 | 0.119411276 | Up   |
| XR_001842399.1 | 5.228577896 | 1.325913199 | 2.455856657  | 9.554979356 | 3.256252756  | 0.014054921 | 0.325271022 | Up   |
| XR_001842543.1 | 26.99243832 | 0.536940367 | 2.251066548  | 2.311274317 | 1.208688499  | 0.024381323 | 0.375118228 | Up   |
| XR_001842581.1 | 5.579372546 | 0.96908952  | -2.677570117 | 0.16553347  | -2.59480514  | 0.007415833 | 0.252138319 | Down |
| XR_001842705.1 | 6.412322317 | 1.005904451 | -3.021620061 | 0.121627295 | -3.039461069 | 0.002514259 | 0.160256235 | Down |
| XR_001842727.1 | 35.35909575 | 0.716668639 | 2.303259258  | 3.139802203 | 1.650673677  | 0.02126426  | 0.360380144 | Up   |
| XR_001842813.1 | 19.90132307 | 0.451957327 | 2.580225642  | 2.244123208 | 1.166151885  | 0.009873578 | 0.282373835 | Up   |
| XR_350304.3    | 4.223362939 | 1.001290504 | -2.277435549 | 0.205844301 | -2.280374588 | 0.022760229 | 0.368504563 | Down |
| XR_351052.3    | 4.743590172 | 1.179893646 | 2.621414858  | 8.532631447 | 3.092990735  | 0.008756563 | 0.275306415 | Up   |
| XR_351412.2    | 2.1372744   | 1.587749331 | 2.167792979  | 10.86722628 | 3.441911853  | 0.030174441 | 0.418919332 | Up   |
| XR_352307.3    | 20.88737302 | 0.537948159 | -2.555920332 | 0.385565364 | -1.374952636 | 0.010590736 | 0.283173669 | Down |

|             |             |             |              |             |              |             |             |      |
|-------------|-------------|-------------|--------------|-------------|--------------|-------------|-------------|------|
| XR_352593.3 | 12.26125404 | 0.967595483 | -3.00827015  | 0.132973567 | -2.910788609 | 0.002627395 | 0.16445102  | Down |
| XR_352834.3 | 10.08018676 | 0.905769494 | -2.326523434 | 0.232081921 | -2.107293954 | 0.019990644 | 0.35694427  | Down |
| XR_352956.3 | 2.182544484 | 0.851716322 | -2.188702995 | 0.27468422  | -1.864154064 | 0.028618434 | 0.410495665 | Down |
| XR_353043.2 | 4.149141365 | 0.939161559 | 3.351059333  | 8.859259443 | 3.147186107  | 0.000805031 | 0.100775184 | Up   |
| XR_353702.3 | 6.408636471 | 0.527064143 | 2.255229845  | 2.279394737 | 1.188650787  | 0.024118905 | 0.374216708 | Up   |
| XR_354783.3 | 5.645759389 | 0.814544592 | -2.075553106 | 0.309791495 | -1.690630559 | 0.037935302 | 0.452267631 | Down |
| XR_354962.3 | 3.06548481  | 1.002252532 | 3.001054581  | 8.043450648 | 3.007814552  | 0.002690463 | 0.164833194 | Up   |
| XR_355452.3 | 43.27411572 | 0.453039982 | 2.572070018  | 2.24272162  | 1.165250556  | 0.010109244 | 0.282373835 | Up   |
| XR_355734.1 | 1.718671875 | 1.361369032 | 2.680173485  | 12.54208402 | 3.648705184  | 0.007358401 | 0.252138319 | Up   |
| XR_356227.1 | 11.89004898 | 0.828313012 | -2.393475704 | 0.25304273  | -1.982547071 | 0.016689587 | 0.339211229 | Down |
| XR_356607.2 | 3.790058594 | 1.014069153 | 2.1022999    | 4.38287483  | 2.131877478  | 0.035527013 | 0.438561098 | Up   |
| XR_356878.3 | 7.799284971 | 0.57840928  | 2.092361766  | 2.313763589 | 1.210241463  | 0.036406166 | 0.440892949 | Up   |
| XR_357177.2 | 9.038930764 | 0.388147195 | 3.057271976  | 2.276269761 | 1.186671542  | 0.002233615 | 0.158793155 | Up   |
| XR_357742.3 | 5.770795232 | 1.265437078 | -2.034113818 | 0.167932918 | -2.574043045 | 0.041940121 | 0.475321373 | Down |
| XR_357824.3 | 8.979765722 | 1.027450747 | -1.978413158 | 0.244393517 | -2.032722077 | 0.047882117 | 0.49458484  | Down |
| XR_358458.3 | 42.23464404 | 0.954874114 | -2.219628331 | 0.230132136 | -2.119465636 | 0.026444008 | 0.39365836  | Down |
| XR_358461.3 | 26.39592839 | 0.757913087 | 2.364845265  | 3.4637797   | 1.792347176  | 0.018037605 | 0.353413045 | Up   |
| XR_359388.3 | 15.86692492 | 0.676748549 | -1.967864924 | 0.397286112 | -1.331749732 | 0.049083582 | 0.498132265 | Down |
| XR_360208.3 | 1.832183256 | 1.286778785 | 2.900476577  | 13.29002327 | 3.732271726  | 0.003725957 | 0.207826827 | Up   |
| XR_360239.3 | 11.88200105 | 0.538766203 | 2.252476008  | 2.319088612 | 1.213557946  | 0.024292207 | 0.374794054 | Up   |
| XR_360443.3 | 2.390546608 | 1.08779597  | -2.936750948 | 0.109227964 | -3.194585846 | 0.003316703 | 0.18833405  | Down |
| XR_360488.2 | 16.86405983 | 0.544140313 | -2.162284835 | 0.442397045 | -1.176586346 | 0.030596228 | 0.419213989 | Down |
| XR_361802.3 | 1.927580567 | 0.908543747 | 1.990738293  | 3.503198719 | 1.808672827  | 0.046509666 | 0.489552802 | Up   |
| XR_362158.2 | 100.6340828 | 0.39540993  | 3.353565918  | 2.507123846 | 1.326033264  | 0.000797774 | 0.100775184 | Up   |
| XR_362349.3 | 53.32167954 | 0.364119466 | 3.51965683   | 2.43104326  | 1.281575566  | 0.000432105 | 0.079334568 | Up   |
| XR_362499.3 | 41.95234864 | 0.677650458 | 3.321672918  | 4.759906299 | 2.250933174  | 0.000894795 | 0.104862381 | Up   |
| XR_362545.3 | 5.456248575 | 0.812727893 | 2.103070946  | 3.269849916 | 1.709224418  | 0.035459568 | 0.438561098 | Up   |
| XR_362560.3 | 207.8007809 | 0.74939305  | 2.547043996  | 3.75480261  | 1.908737067  | 0.010863974 | 0.283596049 | Up   |
| XR_589888.2 | 9.005331341 | 1.304963149 | 4.280647761  | 48.03744726 | 5.586087582  | 1.86E-05    | 0.011404627 | Up   |
| XR_590070.1 | 2.537388935 | 1.251796814 | 3.375475485  | 18.70574417 | 4.225409457  | 0.000736883 | 0.098993882 | Up   |
| XR_590134.2 | 7.382275795 | 0.691573327 | 2.601843948  | 3.480672019 | 1.799365876  | 0.009272403 | 0.280617571 | Up   |
| XR_590215.1 | 50.27542729 | 0.489626191 | 2.517279522  | 2.349780481 | 1.232525985  | 0.011826496 | 0.301575653 | Up   |

|             |             |             |              |             |              |             |             |      |
|-------------|-------------|-------------|--------------|-------------|--------------|-------------|-------------|------|
| XR_590257.2 | 9.539229131 | 1.433629716 | 2.808192881  | 16.28993297 | 4.025908763  | 0.004982038 | 0.230194912 | Up   |
| XR_590260.2 | 2.166049482 | 1.653802621 | 2.413302419  | 15.90188477 | 3.991125866  | 0.015808696 | 0.338108291 | Up   |
| XR_590265.2 | 28.78682359 | 1.231399353 | 2.759926026  | 10.54561351 | 3.398571124  | 0.005781445 | 0.239822186 | Up   |
| XR_590369.2 | 10.29510332 | 0.694087499 | 2.334090045  | 3.073883997 | 1.620062721  | 0.019591007 | 0.35694427  | Up   |
| XR_590370.2 | 3.704600928 | 1.094480655 | 2.462285848  | 6.475197638 | 2.694924228  | 0.013805459 | 0.324840699 | Up   |
| XR_590384.2 | 107.2291669 | 0.366754483 | -2.790302389 | 0.491970627 | -1.023355911 | 0.005265883 | 0.23747014  | Down |
| XR_590417.2 | 2.734358548 | 1.220241348 | 1.997462229  | 5.416594165 | 2.437386002  | 0.045774994 | 0.4878112   | Up   |
| XR_590741.1 | 3.339940813 | 1.150460148 | -2.490413679 | 0.137250024 | -2.865121689 | 0.012759449 | 0.311819215 | Down |
| XR_590792.2 | 14.95295012 | 0.734159037 | 2.799657952  | 4.156571957 | 2.055394187  | 0.005115678 | 0.232869053 | Up   |
| XR_591065.2 | 28.41394805 | 1.252280454 | -3.234912681 | 0.06032844  | -4.051017922 | 0.001216799 | 0.117581244 | Down |
| XR_591076.2 | 2.011578257 | 1.649059413 | 2.348480799  | 14.64954924 | 3.872784369  | 0.018850171 | 0.355407874 | Up   |
| XR_591349.2 | 20.06919438 | 0.648894412 | -2.649427641 | 0.303717346 | -1.71919879  | 0.008062824 | 0.263491609 | Down |
| XR_591420.2 | 3.927643536 | 0.714535559 | 2.298329335  | 3.121496909 | 1.642238037  | 0.021543052 | 0.361571443 | Up   |
| XR_591431.1 | 1.669181841 | 1.390622398 | -2.282677036 | 0.110771464 | -3.174341815 | 0.022449399 | 0.368504563 | Down |
| XR_591533.1 | 8.916438951 | 1.378855479 | -2.468991659 | 0.094444941 | -3.404382677 | 0.013549438 | 0.321682339 | Down |
| XR_591534.2 | 2.840345263 | 1.587905228 | -3.178936318 | 0.030230537 | -5.047849599 | 0.001478166 | 0.127214629 | Down |
| XR_591556.2 | 2.82053888  | 1.242155842 | -2.419385601 | 0.124545607 | -3.005253959 | 0.01554675  | 0.334498044 | Down |
| XR_592063.1 | 9.904352715 | 3.006190097 | -2.277179857 | 0.008694775 | -6.845635534 | 0.022775488 | 0.368504563 | Down |
| XR_592126.1 | 1.462588157 | 1.376200988 | -2.558941469 | 0.087073784 | -3.521617777 | 0.010499142 | 0.283173669 | Down |
| XR_592335.2 | 8.232696224 | 1.003145536 | 2.85893482   | 7.300158074 | 2.867927704  | 0.004250661 | 0.225210841 | Up   |
| XR_592444.2 | 21.78817015 | 0.890111845 | 2.398537548  | 4.39226982  | 2.134966683  | 0.016460689 | 0.338557345 | Up   |
| XR_592459.2 | 10.48274952 | 0.952378649 | -2.131990828 | 0.244776584 | -2.030462544 | 0.033007601 | 0.430400679 | Down |
| XR_592854.2 | 10.57548171 | 0.638854438 | -2.315172784 | 0.35872286  | -1.479058408 | 0.020603478 | 0.359088457 | Down |
| XR_592974.2 | 3.021206152 | 0.836111335 | -2.041380463 | 0.306334266 | -1.706821344 | 0.041213025 | 0.470957138 | Down |
| XR_593074.1 | 4.625074156 | 0.919620454 | 2.066956388  | 3.734241863 | 1.900815372  | 0.038738264 | 0.453979481 | Up   |
| XR_593173.2 | 8.68784006  | 0.990966022 | -2.13991301  | 0.229954274 | -2.120581083 | 0.032361797 | 0.428482645 | Down |
| XR_593421.2 | 43.27411572 | 0.453039982 | 2.572070018  | 2.24272162  | 1.165250556  | 0.010109244 | 0.282373835 | Up   |
| XR_593492.2 | 6.986402814 | 0.733910901 | 1.999680714  | 2.765590348 | 1.467587474  | 0.045534752 | 0.4878112   | Up   |
| XR_593566.2 | 2.529883648 | 2.317053246 | 2.047890315  | 26.81690623 | 4.745070903  | 0.040570748 | 0.467497239 | Up   |
| XR_593568.2 | 7.795801199 | 1.012787875 | 2.539629114  | 5.946767096 | 2.572105574  | 0.011097008 | 0.288312823 | Up   |
| XR_593600.2 | 3.972798991 | 1.070833221 | -2.255413854 | 0.18748251  | -2.415172081 | 0.024107364 | 0.374216708 | Down |
| XR_593676.1 | 9.20879128  | 0.925206005 | 2.308032878  | 4.39360715  | 2.135405879  | 0.020997308 | 0.359171341 | Up   |

|             |             |             |              |             |              |             |             |      |
|-------------|-------------|-------------|--------------|-------------|--------------|-------------|-------------|------|
| XR_593708.1 | 1.539158546 | 1.627787029 | -2.201947742 | 0.083371496 | -3.584301973 | 0.027669    | 0.404246292 | Down |
| XR_593733.1 | 2.513260866 | 0.973229105 | 2.390054621  | 5.014377875 | 2.326070719  | 0.016845867 | 0.341128812 | Up   |
| XR_593909.1 | 12.44691418 | 0.812317462 | -2.460887077 | 0.250169611 | -1.999021543 | 0.013859398 | 0.324840699 | Down |
| XR_593913.1 | 12.86494649 | 0.746680592 | 2.31932763   | 3.321412548 | 1.731796929  | 0.020377278 | 0.359088457 | Up   |
| XR_593968.2 | 4.877502694 | 1.24064547  | -2.243287772 | 0.145276694 | -2.783124813 | 0.024878263 | 0.378819128 | Down |
| XR_594733.1 | 3.48914463  | 1.674973267 | -2.579011175 | 0.050074684 | -4.319774772 | 0.009908358 | 0.282373835 | Down |
| XR_595062.2 | 4.190794999 | 1.736464621 | 2.297053779  | 15.87574753 | 3.98875262   | 0.021615702 | 0.361571443 | Up   |
| XR_595091.2 | 14.98767348 | 0.906358651 | 3.111702426  | 7.063182698 | 2.820318414  | 0.001860119 | 0.142299101 | Up   |
| XR_595129.2 | 27.14709043 | 0.462376112 | 2.432446171  | 2.180569545 | 1.124705003  | 0.014997221 | 0.33359834  | Up   |
| XR_595230.2 | 1.688449776 | 1.087327682 | -2.42636525  | 0.160622499 | -2.638254103 | 0.015250913 | 0.33359834  | Down |
| XR_595288.2 | 3.223594792 | 1.11892958  | -2.280141872 | 0.170599085 | -2.551318186 | 0.022599276 | 0.368504563 | Down |
| XR_595346.1 | 6.102082711 | 1.314406375 | 3.807830303  | 32.11190674 | 5.005036427  | 0.000140191 | 0.04542202  | Up   |
| XR_595348.1 | 10.60692415 | 1.222679411 | 3.296557646  | 16.34336512 | 4.030633162  | 0.000978775 | 0.110022329 | Up   |
| XR_595418.2 | 2.146484711 | 1.714221786 | 2.008630939  | 10.8772271  | 3.443238916  | 0.044576288 | 0.48619048  | Up   |
| XR_595477.2 | 11.24669189 | 0.535384002 | -2.08384776  | 0.46148039  | -1.115658752 | 0.037174017 | 0.445533362 | Down |
| XR_595536.2 | 39.52831004 | 0.429537151 | 2.76930783   | 2.28076941  | 1.189520595  | 0.005617553 | 0.239822186 | Up   |
| XR_595538.2 | 1.35090283  | 1.405251992 | -2.002389673 | 0.142214249 | -2.813862077 | 0.045242838 | 0.4878112   | Down |
| XR_595889.1 | 4.192280695 | 1.651564257 | -2.474423589 | 0.058855883 | -4.086669555 | 0.013345136 | 0.320982584 | Down |
| XR_596537.2 | 8.725787408 | 0.557417344 | -2.408991273 | 0.394251045 | -1.342813516 | 0.01599668  | 0.338108291 | Down |
| XR_596640.2 | 11.69285889 | 0.692641545 | 1.984921915  | 2.593390364 | 1.374839381  | 0.04715316  | 0.492241161 | Up   |
| XR_596705.2 | 2.92581428  | 1.063925478 | 2.756608549  | 7.636047454 | 2.932826068  | 0.005840422 | 0.239822186 | Up   |
| XR_596950.2 | 3.818027212 | 1.483124146 | -2.318748833 | 0.092206203 | -3.438992383 | 0.020408659 | 0.359088457 | Down |
| XR_597034.2 | 20.45534606 | 1.506427057 | -2.099863274 | 0.111623226 | -3.163290852 | 0.03574087  | 0.439421235 | Down |
| XR_597100.2 | 5.51643456  | 1.077797454 | 2.427813099  | 6.133415879 | 2.616690777  | 0.015190169 | 0.33359834  | Up   |
| XR_597103.2 | 4.097539498 | 1.003251913 | 2.617910807  | 6.174935318 | 2.626424025  | 0.008846993 | 0.275306415 | Up   |
| XR_597114.1 | 6.715083597 | 0.934808224 | 2.536916183  | 5.174896869 | 2.371530111  | 0.011183373 | 0.289192565 | Up   |
| XR_597251.2 | 1.159152771 | 1.296541228 | 2.336355137  | 8.163460024 | 3.029180758  | 0.01947274  | 0.35694427  | Up   |
| XR_597297.1 | 114.2571935 | 0.428937837 | -2.575736791 | 0.464956944 | -1.104830968 | 0.010002676 | 0.282373835 | Down |
| XR_597306.2 | 17.7819002  | 1.154019306 | -2.13712586  | 0.180956583 | -2.466284501 | 0.032587756 | 0.429523977 | Down |
| XR_597441.1 | 1248.791449 | 0.705233582 | -2.847318268 | 0.248613327 | -2.008024462 | 0.004408926 | 0.226006179 | Down |
| XR_597570.2 | 3.948407817 | 2.740302114 | -2.012886324 | 0.021854639 | -5.515916648 | 0.04412659  | 0.486098512 | Down |

**Supplementary table 4:** The comparison between high-dose EWH treated and the control female SHR for identified DE-circRNA

| circRNA                                 | case_value | control_value | FoldChange | log2FoldChange | z-score     | pValue    | qValue    | Regulation |
|-----------------------------------------|------------|---------------|------------|----------------|-------------|-----------|-----------|------------|
| circRNA_2399 Chr13:32453777_32469550_-  | 4776.72338 | 1146.52598    | 3.67215538 | 1.8766271      | 44.5900074  | 0         | 0         | Up         |
| circRNA_6661 Chr4:183498456_183537970_- | 2578.73962 | 5506.66707    | 0.41275613 | -1.27663845    | -38.5186976 | 0         | 0         | Down       |
| circRNA_6076 Chr3:172518176_172524861_+ | 1834.56172 | 3509.68655    | 0.4607219  | -1.11803192    | -27.6647429 | 1.86E-168 | 1.10E-165 | Down       |
| circRNA_8678 Chr8:84434784_84461546_-   | 837.259965 | 123.735696    | 5.9640349  | 2.5762887      | 22.680008   | 7.06E-114 | 2.99E-111 | Up         |
| circRNA_3691 Chr17:19160994_19225009_+  | 433.228403 | 0             | 763.698215 | 9.57685884     | 18.0256374  | 1.23E-72  | 3.03E-70  | Up         |
| circRNA_4254 Chr18:81418662_81428974_-  | 630.528056 | 1293.19135    | 0.42975059 | -1.21842847    | -17.9710261 | 3.29E-72  | 7.49E-70  | Down       |
| circRNA_2962 Chr14:87328008_87357732_+  | 350.822321 | 37.4684141    | 8.25271344 | 3.04486855     | 15.9964393  | 1.35E-57  | 2.36E-55  | Up         |
| circRNA_1532 Chr10:72147777_72148017_+  | 524.162018 | 111.505775    | 4.14326817 | 2.0507692      | 15.6459038  | 3.54E-55  | 5.52E-53  | Up         |
| circRNA_8680 Chr8:84443616_84461546_-   | 282.492643 | 0             | 497.980108 | 8.95994431     | 15.1546119  | 7.06E-52  | 1.05E-49  | Up         |
| circRNA_9560 ChrX:119152559_119152714_+ | 368.545626 | 791.100301    | 0.41061477 | -1.28414256    | -14.6436473 | 1.48E-48  | 2.09E-46  | Down       |
| circRNA_0690 Chr1:204960841_204988430_+ | 226.823159 | 0             | 399.845533 | 8.64329896     | 13.8384946  | 1.49E-43  | 2.01E-41  | Up         |
| circRNA_2718 Chr14:5990330_6026568_+    | 0          | 203.900456    | 0.00216136 | -8.85384637    | -13.8030125 | 2.44E-43  | 3.15E-41  | Down       |
| circRNA_7805 Chr6:126864143_126894194_+ | 222.234494 | 0             | 391.756601 | 8.61381377     | 13.7210008  | 7.60E-43  | 9.38E-41  | Up         |
| circRNA_8910 Chr9:8856697_8857681_-     | 316.68192  | 53.6414148    | 5.20352809 | 2.37949013     | 13.3286049  | 1.58E-40  | 1.80E-38  | Up         |
| circRNA_6943 Chr5:109530786_109563853_- | 199.272461 | 0             | 351.27896  | 8.45647336     | 13.1080604  | 2.96E-39  | 3.13E-37  | Up         |
| circRNA_0651 Chr1:200648164_200672411_- | 191.347447 | 0             | 337.308687 | 8.39792566     | 12.8859066  | 5.40E-38  | 5.52E-36  | Up         |
| circRNA_3706 Chr17:24052253_24058139_-  | 308.430161 | 57.3256081    | 4.74223454 | 2.24556702     | 12.7049471  | 5.55E-37  | 5.30E-35  | Up         |
| circRNA_4851 Chr2:124187476_124205983_+ | 25.7480057 | 192.015267    | 0.11819053 | -3.0808136     | -12.6748452 | 8.15E-37  | 7.55E-35  | Down       |
| circRNA_3419 Chr16:22715018_22787198_+  | 654.688264 | 236.307404    | 2.44192367 | 1.2880181      | 12.5350099  | 4.80E-36  | 4.31E-34  | Up         |
| circRNA_6171 Chr4:26336094_26341599_+   | 260.780347 | 40.040311     | 5.74053377 | 2.52118489     | 12.50437    | 7.07E-36  | 6.16E-34  | Up         |
| circRNA_6944 Chr5:109560566_109563853_- | 173.127322 | 0             | 305.190117 | 8.25356444     | 12.3515123  | 4.78E-35  | 4.05E-33  | Up         |
| circRNA_7405 Chr6:21351085_21354603_-   | 200.900253 | 20.183117     | 8.77338333 | 3.1331333      | 12.266681   | 1.37E-34  | 1.13E-32  | Up         |
| circRNA_9592 ChrX:137720737_137733342_- | 167.990736 | 0             | 296.135305 | 8.21011269     | 12.1943206  | 3.33E-34  | 2.67E-32  | Up         |
| circRNA_0181 Chr1:73736838_73737496_-   | 192.162667 | 18.4756461    | 9.16735903 | 3.19650618     | 12.1059221  | 9.83E-34  | 7.66E-32  | Up         |
| circRNA_5677 Chr3:54509941_54519757_-   | 164.535122 | 0             | 290.043724 | 8.18012659     | 12.0868134  | 1.24E-33  | 9.42E-32  | Up         |
| circRNA_9253 Chr9:94459965_94481167_+   | 0          | 147.199356    | 0.00299391 | -8.38375273    | -12.0476398 | 2.00E-33  | 1.48E-31  | Down       |
| circRNA_7586 Chr6:73357940_73361828_+   | 54.6764391 | 236.055869    | 0.20415512 | -2.29226234    | -11.9876623 | 4.12E-33  | 2.98E-31  | Down       |
| circRNA_9264 Chr9:95046633_95047485_+   | 193.807281 | 20.0201555    | 8.53252364 | 3.09297251     | 11.9768103  | 4.70E-33  | 3.32E-31  | Up         |

|                                         |            |            |            |             |             |          |          |      |
|-----------------------------------------|------------|------------|------------|-------------|-------------|----------|----------|------|
| circRNA_8057 Chr7:66743103_66747728_+   | 160.007175 | 0          | 282.061824 | 8.13986761  | 11.9437118  | 7.00E-33 | 4.82E-31 | Up   |
| circRNA_8492 Chr8:59736470_59745377_+   | 188.688434 | 18.6560843 | 8.91455445 | 3.15616269  | 11.9276789  | 8.49E-33 | 5.72E-31 | Up   |
| circRNA_5816 Chr3:104816866_104818862_+ | 159.360498 | 0          | 280.921859 | 8.13402507  | 11.9230615  | 8.97E-33 | 5.91E-31 | Up   |
| circRNA_3323 Chr16:2117271_2128403_-    | 155.74162  | 0          | 274.542473 | 8.10088555  | 11.8064886  | 3.61E-32 | 2.33E-30 | Up   |
| circRNA_6209 Chr4:38838812_38841741_-   | 264.022164 | 50.0503887 | 4.64951646 | 2.21708069  | 11.662997   | 1.97E-31 | 1.24E-29 | Up   |
| circRNA_3176 Chr15:48150476_48162894_+  | 17.1653372 | 147.350141 | 0.10267782 | -3.28380352 | -11.4256552 | 3.11E-30 | 1.92E-28 | Down |
| circRNA_4095 Chr18:30185396_30213862_+  | 142.725717 | 0          | 251.597943 | 7.97497632  | 11.372134   | 5.76E-30 | 3.48E-28 | Up   |
| circRNA_2378 Chr12:51981500_51997274_+  | 0          | 123.106024 | 0.00357986 | -8.12588273 | -11.1667619 | 5.93E-29 | 3.44E-27 | Down |
| circRNA_3618 Chr17:5524117_5529053_+    | 135.240285 | 0          | 238.402569 | 7.89725597  | 11.1106558  | 1.11E-28 | 6.22E-27 | Up   |
| circRNA_2914 Chr14:81267948_81280976_-  | 610.428832 | 242.212156 | 2.2213345  | 1.15142665  | 11.0794175  | 1.58E-28 | 8.66E-27 | Up   |
| circRNA_2621 Chr13:98374476_98403224_+  | 132.262996 | 0          | 233.154182 | 7.8651405   | 11.0040617  | 3.65E-28 | 1.97E-26 | Up   |
| circRNA_8706 Chr8:91509748_91527174_+   | 199.616931 | 30.2746755 | 5.81156015 | 2.53892552  | 10.9831806  | 4.60E-28 | 2.44E-26 | Up   |
| circRNA_2742 Chr14:10786399_10787114_+  | 0          | 117.987109 | 0.00373517 | -8.06461061 | -10.9655114 | 5.60E-28 | 2.91E-26 | Down |
| circRNA_5333 Chr20:5972508_5975676_+    | 241.759848 | 48.1672435 | 4.42391973 | 2.14532521  | 10.9343348  | 7.90E-28 | 3.97E-26 | Up   |
| circRNA_3754 Chr17:51948917_52027612_+  | 130.136422 | 0          | 229.405442 | 7.84175581  | 10.9269752  | 8.57E-28 | 4.23E-26 | Up   |
| circRNA_0116 Chr1:36407810_36419485_+   | 130.087109 | 0          | 229.318512 | 7.84120901  | 10.925178   | 8.74E-28 | 4.24E-26 | Up   |
| circRNA_6188 Chr4:28488037_28514174_+   | 129.297076 | 0          | 227.925837 | 7.83242066  | 10.8963264  | 1.20E-27 | 5.73E-26 | Up   |
| circRNA_3944 Chr17:87396008_87396291_+  | 166.055513 | 18.6560843 | 7.84526575 | 2.97182232  | 10.8779143  | 1.47E-27 | 6.91E-26 | Up   |
| circRNA_8159 Chr7:102723273_102723586_+ | 127.464435 | 0          | 224.695244 | 7.81182578  | 10.8289592  | 2.51E-27 | 1.16E-25 | Up   |
| circRNA_3597 Chr17:1059417_1065593_-    | 126.433774 | 0          | 222.878386 | 7.80011291  | 10.7907981  | 3.80E-27 | 1.73E-25 | Up   |
| circRNA_4542 Chr2:22264781_22267377_+   | 54.0399471 | 208.878411 | 0.22803222 | -2.1326904  | -10.7856127 | 4.03E-27 | 1.81E-25 | Down |
| circRNA_6693 Chr5:7725207_7780390_-     | 224.0788   | 461.336183 | 0.4281127  | -1.22393746 | -10.7689552 | 4.82E-27 | 2.13E-25 | Down |
| circRNA_2533 Chr13:74923279_74933949_-  | 99.8603296 | 281.573169 | 0.31259108 | -1.67765147 | -10.659222  | 1.58E-26 | 6.88E-25 | Down |
| circRNA_7043 Chr5:129621176_129709689_+ | 122.642643 | 0          | 216.195353 | 7.7561917   | 10.6486803  | 1.77E-26 | 7.59E-25 | Up   |
| circRNA_1609 Chr10:85164768_85172858_-  | 121.582418 | 0          | 214.32638  | 7.74366563  | 10.608431   | 2.72E-26 | 1.15E-24 | Up   |
| circRNA_8256 Chr7:126667194_126669197_+ | 66.9276199 | 226.65642  | 0.26026287 | -1.94195859 | -10.5743026 | 3.92E-26 | 1.64E-24 | Down |
| circRNA_7024 Chr5:128699500_128705550_- | 159.077864 | 18.6560843 | 7.51560787 | 2.90988979  | 10.5375149  | 5.80E-26 | 2.39E-24 | Up   |
| circRNA_2935 Chr14:83260146_83262412_+  | 119.726164 | 0          | 211.054163 | 7.72146947  | 10.537415   | 5.81E-26 | 2.36E-24 | Up   |
| circRNA_9531 ChrX:104429943_104487794_- | 18.9186229 | 134.412275 | 0.12405819 | -3.01091109 | -10.4901887 | 9.58E-26 | 3.84E-24 | Down |
| circRNA_7463 Chr6:27858538_27889650_+   | 326.784041 | 94.3860125 | 3.05160318 | 1.60956737  | 10.4659976  | 1.24E-25 | 4.89E-24 | Up   |
| circRNA_7591 Chr6:73905444_73908680_+   | 117.87774  | 0          | 207.795746 | 7.69902231  | 10.4659914  | 1.24E-25 | 4.82E-24 | Up   |
| circRNA_6832 Chr5:69951194_69966907_-   | 161.655848 | 20.183117  | 7.05956663 | 2.81957962  | 10.4552381  | 1.39E-25 | 5.33E-24 | Up   |

|                                          |            |            |            |             |             |          |          |      |
|------------------------------------------|------------|------------|------------|-------------|-------------|----------|----------|------|
| circRNA_6682 Chr5:7660223_7752392_-      | 0          | 105.482091 | 0.00417798 | -7.90297944 | -10.4489414 | 1.48E-25 | 5.63E-24 | Down |
| circRNA_5923 Chr3:128908691_128911559_+  | 116.96654  | 0          | 206.189478 | 7.6878269   | 10.4305173  | 1.80E-25 | 6.75E-24 | Up   |
| circRNA_4161 Chr18:57338957_57345061_+   | 116.273865 | 0          | 204.968424 | 7.67925787  | 10.4034315  | 2.39E-25 | 8.85E-24 | Up   |
| circRNA_2252 Chr12:27441155_27441367_+   | 0          | 104.39609  | 0.00422144 | -7.88804905 | -10.402253  | 2.42E-25 | 8.85E-24 | Down |
| circRNA_8074 Chr7:70860232_70860799_+    | 0          | 103.623836 | 0.0042529  | -7.87733726 | -10.3688622 | 3.44E-25 | 1.24E-23 | Down |
| circRNA_2612 Chr13:95914250_95932651_-   | 19.1138009 | 132.704804 | 0.12695075 | -2.97765918 | -10.3678011 | 3.47E-25 | 1.24E-23 | Down |
| circRNA_4089 Chr18:29457228_29457626_+   | 386.187099 | 127.483423 | 2.67004698 | 1.41686513  | 10.3557219  | 3.94E-25 | 1.39E-23 | Up   |
| circRNA_9344 Chr9:119309035_119311107_-  | 79.7879528 | 242.906288 | 0.28951657 | -1.78828218 | -10.3526572 | 4.07E-25 | 1.42E-23 | Down |
| circRNA_5678 Chr3:54509941_54548558_-    | 151.417057 | 17.2852971 | 7.72098683 | 2.94878525  | 10.3480726  | 4.27E-25 | 1.47E-23 | Up   |
| circRNA_0872 Chr1:243373401_243376079_+  | 18.9186229 | 130.22164  | 0.12805048 | -2.96521541 | -10.249496  | 1.19E-24 | 4.00E-23 | Down |
| circRNA_4962 Chr2:178408989_178436951_-  | 111.94754  | 0          | 197.341946 | 7.62455383  | 10.2318668  | 1.43E-24 | 4.75E-23 | Up   |
| circRNA_2820 Chr14:37579854_37583161_+   | 111.426218 | 0          | 196.422956 | 7.61781974  | 10.2109075  | 1.77E-24 | 5.83E-23 | Up   |
| circRNA_7483 Chr6:29142111_29146505_+    | 110.951246 | 0          | 195.585673 | 7.61165688  | 10.1917567  | 2.16E-24 | 7.03E-23 | Up   |
| circRNA_3333 Chr16:2158111_2179241_-     | 0          | 98.9108384 | 0.00445555 | -7.81018189 | -10.1615236 | 2.94E-24 | 9.48E-23 | Down |
| circRNA_7985 Chr7:41322521_41326655_+    | 108.981141 | 0          | 192.112758 | 7.58580952  | 10.1117554  | 4.90E-24 | 1.56E-22 | Up   |
| circRNA_3062 Chr15:3233141_3239097_-     | 146.685111 | 17.2852971 | 7.47969766 | 2.90297995  | 10.1067843  | 5.15E-24 | 1.62E-22 | Up   |
| circRNA_3453 Chr16:47896917_47910476_+   | 108.806473 | 0          | 191.804852 | 7.5834954   | 10.1046179  | 5.27E-24 | 1.64E-22 | Up   |
| circRNA_5230 Chr2:247429495_247446708_-  | 108.777809 | 0          | 191.754322 | 7.58311529  | 10.1034459  | 5.33E-24 | 1.65E-22 | Up   |
| circRNA_8671 Chr8:82038973_82045524_+    | 146.222915 | 17.2852971 | 7.4561296  | 2.89842694  | 10.0829741  | 6.57E-24 | 2.01E-22 | Up   |
| circRNA_8025 Chr7:60390972_60408823_-    | 62.291899  | 207.988926 | 0.26397708 | -1.92151543 | -10.0583859 | 8.44E-24 | 2.52E-22 | Down |
| circRNA_5439 Chr20:34646376_34656748_-   | 107.467354 | 0          | 189.444242 | 7.56562948  | 10.049651   | 9.22E-24 | 2.73E-22 | Up   |
| circRNA_4291 Chr19:15504040_15516663_-   | 107.369765 | 0          | 189.272211 | 7.5643188   | 10.0456281  | 9.60E-24 | 2.82E-22 | Up   |
| circRNA_7789 Chr6:125550201_125594377_-  | 106.412601 | 0          | 187.584917 | 7.55140002  | 10.0060463  | 1.43E-23 | 4.16E-22 | Up   |
| circRNA_0929 Chr1:252627911_252632249_+  | 606.205582 | 264.227622 | 2.02216493 | 1.01590067  | 9.97302621  | 2.00E-23 | 5.75E-22 | Up   |
| circRNA_6579 Chr4:168260038_168297373_-  | 0          | 94.6270161 | 0.00465725 | -7.74630541 | -9.96747332 | 2.12E-23 | 6.02E-22 | Down |
| circRNA_8964 Chr9:20826561_20849380_+    | 104.858395 | 0          | 184.845149 | 7.53017338  | 9.94128518  | 2.75E-23 | 7.76E-22 | Up   |
| circRNA_2095 Chr12:1793318_1793869_-     | 519.655745 | 212.725891 | 2.15312994 | 1.10643539  | 9.89970227  | 4.18E-23 | 1.17E-21 | Up   |
| circRNA_5721 Chr3:61781151_61818651_+    | 17.1080085 | 120.284304 | 0.12536184 | -2.99582984 | -9.89968664 | 4.18E-23 | 1.16E-21 | Down |
| circRNA_8818 Chr8:118066987_118085473_+  | 101.78168  | 0          | 179.421495 | 7.48720893  | 9.81124429  | 1.01E-22 | 2.71E-21 | Up   |
| circRNA_3284 Chr15:103872241_103886205_- | 54.4239325 | 189.376723 | 0.25330174 | -1.98107109 | -9.79361652 | 1.20E-22 | 3.20E-21 | Down |
| circRNA_1742 Chr10:106662761_106699402_+ | 101.241226 | 0          | 178.468778 | 7.47952789  | 9.78814207  | 1.27E-22 | 3.35E-21 | Up   |
| circRNA_3177 Chr15:48165423_48172696_+   | 101.143637 | 0          | 178.296747 | 7.47813657  | 9.78396211  | 1.32E-22 | 3.44E-21 | Up   |



|                                          |            |            |            |             |             |          |          |      |
|------------------------------------------|------------|------------|------------|-------------|-------------|----------|----------|------|
| circRNA_6499 Chr4:147692061_147692909_+  | 101.143637 | 0          | 178.296747 | 7.47813657  | 9.78396211  | 1.32E-22 | 3.44E-21 | Up   |
| circRNA_9301 Chr9:111690153_111703964_+  | 101.133685 | 0          | 178.279204 | 7.47799461  | 9.7835357   | 1.32E-22 | 3.41E-21 | Up   |
| circRNA_6032 Chr3:156775155_156778136_-  | 277.319291 | 500.001424 | 0.48885909 | -1.03250941 | -9.77692356 | 1.41E-22 | 3.61E-21 | Down |
| circRNA_2097 Chr12:1975318_1979802_+     | 100.880946 | 0          | 177.833674 | 7.47438472  | 9.77269762  | 1.47E-22 | 3.73E-21 | Up   |
| circRNA_9315 Chr9:113301509_113313484_-  | 0          | 90.3665269 | 0.00487683 | -7.67984175 | -9.76879095 | 1.53E-22 | 3.85E-21 | Down |
| circRNA_2929 Chr14:82239645_82240095_+   | 108.553735 | 273.529744 | 0.34979619 | -1.51541354 | -9.76050208 | 1.66E-22 | 4.14E-21 | Down |
| circRNA_3078 Chr15:12440027_12442724_-   | 100.560414 | 0          | 177.268637 | 7.4697935   | 9.75892731  | 1.69E-22 | 4.17E-21 | Up   |
| circRNA_1186 Chr10:13931236_13935484_+   | 100.059567 | 0          | 176.385742 | 7.46259013  | 9.73735414  | 2.09E-22 | 5.11E-21 | Up   |
| circRNA_8002 Chr7:52745151_52745558_-    | 99.9098753 | 0          | 176.121863 | 7.4604302   | 9.73089295  | 2.23E-22 | 5.41E-21 | Up   |
| circRNA_1028 Chr1:265682535_265698923_-  | 99.7386491 | 0          | 175.820024 | 7.45795558  | 9.72349468  | 2.39E-22 | 5.77E-21 | Up   |
| circRNA_6227 Chr4:49201155_49232570_+    | 0          | 88.9876217 | 0.00495239 | -7.65765794 | -9.70320037 | 2.92E-22 | 6.92E-21 | Down |
| circRNA_7974 Chr7:37119218_37131623_+    | 97.9677822 | 0          | 172.698327 | 7.4321103   | 9.64649782  | 5.09E-22 | 1.20E-20 | Up   |
| circRNA_7446 Chr6:25409775_25417047_-    | 144.901377 | 20.0201555 | 6.37940133 | 2.67342104  | 9.62623197  | 6.20E-22 | 1.45E-20 | Up   |
| circRNA_8981 Chr9:31437020_31442183_-    | 97.3086111 | 0          | 171.536335 | 7.42237039  | 9.61760954  | 6.74E-22 | 1.56E-20 | Up   |
| circRNA_4193 Chr18:63784568_63786264_+   | 90.3784781 | 243.031636 | 0.32777594 | -1.60921814 | -9.61214945 | 7.11E-22 | 1.63E-20 | Down |
| circRNA_0174 Chr1:65850468_65852263_+    | 189.838885 | 38.6762398 | 4.3262916  | 2.11313091  | 9.59719597  | 8.21E-22 | 1.87E-20 | Up   |
| circRNA_7297 Chr6:894593_907083_+        | 399.078673 | 147.649064 | 2.38233418 | 1.2523758   | 9.57415196  | 1.03E-21 | 2.30E-20 | Up   |
| circRNA_3384 Chr16:10766351_10784805_-   | 0          | 85.9722712 | 0.00512609 | -7.60792469 | -9.55745843 | 1.21E-21 | 2.69E-20 | Down |
| circRNA_5090 Chr2:206534104_206536360_-  | 519.807418 | 220.225548 | 2.08041335 | 1.0568702   | 9.53921136  | 1.44E-21 | 3.18E-20 | Up   |
| circRNA_5382 Chr20:20259263_20276110_+   | 95.4031432 | 0          | 168.177363 | 7.39383971  | 9.53339062  | 1.52E-21 | 3.34E-20 | Up   |
| circRNA_9552 ChrX:114016360_114105957_+  | 111.170516 | 271.833749 | 0.36046334 | -1.47207555 | -9.52318736 | 1.68E-21 | 3.66E-20 | Down |
| circRNA_3864 Chr17:79367996_79396859_-   | 19.1138009 | 118.162097 | 0.14257511 | -2.81020592 | -9.50489025 | 2.00E-21 | 4.30E-20 | Down |
| circRNA_1861 Chr11:34668091_34722272_+   | 0          | 84.7873024 | 0.00519773 | -7.5879015  | -9.49928663 | 2.11E-21 | 4.50E-20 | Down |
| circRNA_9293 Chr9:111057977_111080202_+  | 94.5849945 | 0          | 166.735124 | 7.38141424  | 9.49689899  | 2.16E-21 | 4.57E-20 | Up   |
| circRNA_9323 Chr9:113534327_113545068_+  | 364.60332  | 129.367974 | 2.48409785 | 1.312722    | 9.49232568  | 2.26E-21 | 4.75E-20 | Up   |
| circRNA_3742 Chr17:43258446_43290432_+   | 138.417038 | 18.6560843 | 6.53949052 | 2.70917824  | 9.47531001  | 2.66E-21 | 5.47E-20 | Up   |
| circRNA_2986 Chr14:106486571_106500203_+ | 0          | 83.8379676 | 0.00525659 | -7.57165702 | -9.45230472 | 3.31E-21 | 6.77E-20 | Down |
| circRNA_6861 Chr5:75990187_76011558_-    | 57.6634864 | 187.808546 | 0.27062032 | -1.88565792 | -9.4380312  | 3.80E-21 | 7.71E-20 | Down |
| circRNA_8282 Chr7:134659946_134667817_+  | 92.5809998 | 0          | 163.202468 | 7.35051906  | 9.40665333  | 5.12E-21 | 1.03E-19 | Up   |
| circRNA_0982 Chr1:259448449_259459540_-  | 300.798147 | 95.5642545 | 2.77430713 | 1.47212751  | 9.40515966  | 5.20E-21 | 1.04E-19 | Up   |
| circRNA_5679 Chr3:54509941_54554495_-    | 92.5177792 | 0          | 163.091022 | 7.34953355  | 9.40378607  | 5.26E-21 | 1.05E-19 | Up   |
| circRNA_8646 Chr8:77136036_77140011_+    | 92.3651378 | 0          | 162.821944 | 7.34715134  | 9.39685811  | 5.62E-21 | 1.11E-19 | Up   |

|                                         |            |            |            |             |             |          |          |      |
|-----------------------------------------|------------|------------|------------|-------------|-------------|----------|----------|------|
| circRNA_1676 Chr10:92575022_92578520_-  | 92.3269418 | 0          | 162.754612 | 7.34655462  | 9.39512335  | 5.72E-21 | 1.12E-19 | Up   |
| circRNA_5720 Chr3:61781151_61813898_+   | 257.555885 | 463.174319 | 0.49011937 | -1.02879494 | -9.38204589 | 6.47E-21 | 1.26E-19 | Down |
| circRNA_4729 Chr2:61054405_61137026_+   | 0          | 82.401154  | 0.00534825 | -7.54671782 | -9.38054387 | 6.56E-21 | 1.27E-19 | Down |
| circRNA_6127 Chr4:8141791_8149019_+     | 91.7398564 | 0          | 161.719694 | 7.33735157  | 9.36840162  | 7.36E-21 | 1.42E-19 | Up   |
| circRNA_3577 Chr16:83300884_83303427_+  | 18.9186229 | 115.36292  | 0.14454336 | -2.79042578 | -9.35754444 | 8.16E-21 | 1.56E-19 | Down |
| circRNA_6480 Chr4:140901076_140905153_+ | 91.4855661 | 0          | 161.271429 | 7.33334706  | 9.35679339  | 8.22E-21 | 1.56E-19 | Up   |
| circRNA_4876 Chr2:140311231_140324579_- | 91.2817209 | 0          | 160.912089 | 7.33012891  | 9.34747304  | 8.98E-21 | 1.69E-19 | Up   |
| circRNA_3764 Chr17:54354448_54362356_+  | 91.0949779 | 0          | 160.582897 | 7.32717444  | 9.33892295  | 9.73E-21 | 1.82E-19 | Up   |
| circRNA_2332 Chr12:40921342_40923559_+  | 135.856267 | 18.6642023 | 6.41571556 | 2.68161018  | 9.33622187  | 9.98E-21 | 1.86E-19 | Up   |
| circRNA_7390 Chr6:21268305_21288551_-   | 90.8982485 | 0          | 160.236101 | 7.32405541  | 9.32990349  | 1.06E-20 | 1.96E-19 | Up   |
| circRNA_1448 Chr10:63412175_63418716_+  | 0          | 81.2229819 | 0.00542583 | -7.52594127 | -9.32109924 | 1.15E-20 | 2.12E-19 | Down |
| circRNA_7524 Chr6:48820833_48857932_+   | 90.3593455 | 0          | 159.286119 | 7.31547674  | 9.30513225  | 1.34E-20 | 2.45E-19 | Up   |
| circRNA_2891 Chr14:69774150_69819258_+  | 223.559987 | 57.3404421 | 3.43643312 | 1.78091188  | 9.29763633  | 1.44E-20 | 2.61E-19 | Up   |
| circRNA_6320 Chr4:67449579_67450836_-   | 139.128777 | 20.183117  | 6.07580167 | 2.60307478  | 9.29697655  | 1.44E-20 | 2.61E-19 | Up   |
| circRNA_7999 Chr7:52310713_52318397_-   | 89.8878506 | 0          | 158.454964 | 7.30792905  | 9.28338185  | 1.64E-20 | 2.93E-19 | Up   |
| circRNA_9071 Chr9:61312543_61324138_-   | 180.04367  | 37.3054526 | 4.25383268 | 2.08876329  | 9.27762033  | 1.73E-20 | 3.07E-19 | Up   |
| circRNA_7359 Chr6:10961830_10979314_+   | 89.3419244 | 0          | 157.492602 | 7.29914025  | 9.25810652  | 2.08E-20 | 3.67E-19 | Up   |
| circRNA_8198 Chr7:117453963_117457758_+ | 89.2432043 | 0          | 157.318577 | 7.29754523  | 9.25352543  | 2.17E-20 | 3.81E-19 | Up   |
| circRNA_2077 Chr11:89434192_89447041_-  | 89.1465142 | 0          | 157.148131 | 7.2959813   | 9.2490354   | 2.27E-20 | 3.95E-19 | Up   |
| circRNA_5977 Chr3:148837814_148852242_+ | 88.8924561 | 0          | 156.700276 | 7.29186391  | 9.23722276  | 2.53E-20 | 4.38E-19 | Up   |
| circRNA_3190 Chr15:51822314_51823271_-  | 152.348525 | 25.9279456 | 5.17898921 | 2.37267055  | 9.22879239  | 2.74E-20 | 4.71E-19 | Up   |
| circRNA_9147 Chr9:71616769_71631985_-   | 88.3706214 | 0          | 155.780381 | 7.28336975  | 9.21289172  | 3.17E-20 | 5.44E-19 | Up   |
| circRNA_9303 Chr9:112005677_112008516_- | 88.3419571 | 0          | 155.729852 | 7.28290171  | 9.21155256  | 3.21E-20 | 5.47E-19 | Up   |
| circRNA_6642 Chr4:182648931_182678312_- | 133.240191 | 18.6560843 | 6.29491121 | 2.65418603  | 9.19493009  | 3.75E-20 | 6.35E-19 | Up   |
| circRNA_8420 Chr8:39224604_39235362_-   | 87.5313101 | 0          | 154.300837 | 7.26960208  | 9.17356456  | 4.58E-20 | 7.66E-19 | Up   |
| circRNA_1114 Chr10:800444_802135_+      | 0          | 77.5316771 | 0.00568415 | -7.45883915 | -9.13119421 | 6.77E-20 | 1.12E-18 | Down |
| circRNA_7162 Chr5:151046084_151064330_- | 0          | 77.5154411 | 0.00568534 | -7.458537   | -9.13034626 | 6.83E-20 | 1.12E-18 | Down |
| circRNA_6756 Chr5:24464482_24478439_-   | 216.804063 | 55.9926069 | 3.41280589 | 1.77095836  | 9.12060374  | 7.47E-20 | 1.22E-18 | Up   |
| circRNA_2571 Chr13:83643437_83660292_-  | 17.1653372 | 107.832262 | 0.14030672 | -2.83334396 | -9.11803544 | 7.65E-20 | 1.24E-18 | Down |
| circRNA_0752 Chr1:219356188_219357260_+ | 86.3000517 | 0          | 152.130366 | 7.24916434  | 9.11543345  | 7.84E-20 | 1.27E-18 | Up   |
| circRNA_4531 Chr2:20488617_20519067_+   | 86.2024627 | 0          | 151.958335 | 7.247532    | 9.11080339  | 8.18E-20 | 1.32E-18 | Up   |
| circRNA_6156 Chr4:13456793_13470497_+   | 131.139318 | 18.4756461 | 6.25616428 | 2.6452784   | 9.10557822  | 8.58E-20 | 1.37E-18 | Up   |

|                                          |            |            |            |             |             |          |          |      |
|------------------------------------------|------------|------------|------------|-------------|-------------|----------|----------|------|
| circRNA_2358 Chr12:48187481_48191776_-   | 0          | 76.9230043 | 0.00572913 | -7.44746838 | -9.09932687 | 9.09E-20 | 1.45E-18 | Down |
| circRNA_8710 Chr8:93337648_93345877_-    | 85.9056358 | 0          | 151.435087 | 7.2425557   | 9.09669995  | 9.31E-20 | 1.47E-18 | Up   |
| circRNA_5030 Chr2:189383399_189395748_-  | 130.84297  | 18.4756461 | 6.24202662 | 2.64201451  | 9.08920081  | 9.98E-20 | 1.57E-18 | Up   |
| circRNA_5119 Chr2:211409923_211433553_+  | 0          | 76.682621  | 0.00574709 | -7.44295292 | -9.08669699 | 1.02E-19 | 1.60E-18 | Down |
| circRNA_5906 Chr3:123829471_123833222_+  | 294.269453 | 96.6469078 | 2.68368832 | 1.42421713  | 9.07480683  | 1.14E-19 | 1.78E-18 | Up   |
| circRNA_1842 Chr11:34065892_34070810_+   | 485.811797 | 209.092484 | 2.04787995 | 1.03413114  | 9.05912853  | 1.31E-19 | 2.04E-18 | Up   |
| circRNA_6636 Chr4:181396179_181412674_+  | 0          | 75.9642157 | 0.00580144 | -7.42937324 | -9.04879965 | 1.45E-19 | 2.23E-18 | Down |
| circRNA_3566 Chr16:79742813_79752370_-   | 0          | 75.7904936 | 0.00581474 | -7.42607018 | -9.03960101 | 1.57E-19 | 2.41E-18 | Down |
| circRNA_7392 Chr6:21268305_21315141_-    | 84.6084212 | 0          | 149.148347 | 7.22060418  | 9.03469588  | 1.64E-19 | 2.51E-18 | Up   |
| circRNA_8194 Chr7:116072198_116158807_-  | 129.909617 | 18.6642023 | 6.13488924 | 2.6170373   | 9.01001687  | 2.06E-19 | 3.13E-18 | Up   |
| circRNA_1743 Chr10:106673704_106674297_+ | 129.089684 | 18.4756461 | 6.15838394 | 2.62255181  | 8.99186535  | 2.43E-19 | 3.67E-18 | Up   |
| circRNA_3879 Chr17:79605899_79644806_-   | 0          | 74.6176212 | 0.00590614 | -7.40356964 | -8.97714077 | 2.78E-19 | 4.18E-18 | Down |
| circRNA_7014 Chr5:128130304_128136348_+  | 0          | 74.433825  | 0.00592072 | -7.40001165 | -8.96729599 | 3.04E-19 | 4.55E-18 | Down |
| circRNA_1156 Chr10:5004603_5016350_-     | 0          | 74.365857  | 0.00592613 | -7.39869367 | -8.96365145 | 3.14E-19 | 4.68E-18 | Down |
| circRNA_4327 Chr19:24181887_24221057_+   | 83.0946338 | 0          | 146.479832 | 7.19455823  | 8.9615672   | 3.20E-19 | 4.74E-18 | Up   |
| circRNA_1227 Chr10:18359720_18402658_-   | 83.0170763 | 0          | 146.343113 | 7.19321104  | 8.95779769  | 3.31E-19 | 4.88E-18 | Up   |
| circRNA_1764 Chr10:110000657_110000857_+ | 333.306982 | 120.0917   | 2.44628063 | 1.29058992  | 8.95698956  | 3.34E-19 | 4.89E-18 | Up   |
| circRNA_4527 Chr2:18805524_18826848_-    | 17.1653372 | 105.32989  | 0.14364006 | -2.79946997 | -8.9562955  | 3.36E-19 | 4.90E-18 | Down |
| circRNA_4446 Chr19:43128360_43132122_-   | 82.9315619 | 0          | 146.192367 | 7.19172418  | 8.95363884  | 3.44E-19 | 4.99E-18 | Up   |
| circRNA_3194 Chr15:51925689_51944899_-   | 0          | 73.9322276 | 0.00596089 | -7.39025666 | -8.94034921 | 3.88E-19 | 5.61E-18 | Down |
| circRNA_8855 Chr8:126382526_126390804_-  | 82.6089994 | 0          | 145.623752 | 7.18610187  | 8.93792685  | 3.97E-19 | 5.70E-18 | Up   |
| circRNA_6011 Chr3:152863519_152863878_-  | 82.5983023 | 0          | 145.604895 | 7.18591504  | 8.93740512  | 3.98E-19 | 5.70E-18 | Up   |
| circRNA_0151 Chr1:48220382_48221758_+    | 82.4998144 | 0          | 145.43128  | 7.18419379  | 8.93259958  | 4.16E-19 | 5.93E-18 | Up   |
| circRNA_7640 Chr6:91942178_91961861_-    | 0          | 73.6615703 | 0.00598279 | -7.38496543 | -8.92576032 | 4.43E-19 | 6.27E-18 | Down |
| circRNA_7447 Chr6:25599319_25605180_-    | 82.0871647 | 0          | 144.703858 | 7.17695957  | 8.91242515  | 4.99E-19 | 7.04E-18 | Up   |
| circRNA_6062 Chr3:164177153_164186212_+  | 17.1653372 | 104.638496 | 0.14458915 | -2.78996878 | -8.91121413 | 5.05E-19 | 7.09E-18 | Down |
| circRNA_4491 Chr2:2473889_2523834_+      | 81.9784926 | 0          | 144.51229  | 7.17504838  | 8.9071014   | 5.24E-19 | 7.32E-18 | Up   |
| circRNA_4478 Chr19:56064443_56067048_+   | 45.4859428 | 157.336576 | 0.25481346 | -1.97248661 | -8.90125344 | 5.52E-19 | 7.68E-18 | Down |
| circRNA_8010 Chr7:58367935_58371220_+    | 0          | 73.0663958 | 0.00603153 | -7.37326132 | -8.89355824 | 5.92E-19 | 8.19E-18 | Down |
| circRNA_5352 Chr20:8247936_8251825_+     | 0          | 72.9950697 | 0.00603742 | -7.3718523  | -8.88968787 | 6.13E-19 | 8.44E-18 | Down |
| circRNA_6149 Chr4:10687758_10694249_+    | 131.610941 | 20.183117  | 5.74749516 | 2.52293335  | 8.88647088  | 6.31E-19 | 8.65E-18 | Up   |
| circRNA_3627 Chr17:5546407_5571375_+     | 93.0289167 | 230.995178 | 0.35496858 | -1.49423678 | -8.87662646 | 6.89E-19 | 9.41E-18 | Down |

|                                         |            |            |            |             |             |          |          |      |
|-----------------------------------------|------------|------------|------------|-------------|-------------|----------|----------|------|
| circRNA_4545 Chr2:22778543_22782386_-   | 0          | 72.3877182 | 0.00608807 | -7.35979821 | -8.8566326  | 8.25E-19 | 1.12E-17 | Down |
| circRNA_7316 Chr6:3116549_3130068_-     | 0          | 72.3056171 | 0.00609499 | -7.358161   | -8.85215062 | 8.58E-19 | 1.16E-17 | Down |
| circRNA_5401 Chr20:27293025_27296277_-  | 80.69326   | 0          | 142.246672 | 7.15225109  | 8.84379441  | 9.25E-19 | 1.24E-17 | Up   |
| circRNA_3123 Chr15:33015618_33017521_-  | 154.177106 | 30.0302332 | 4.52518193 | 2.17797579  | 8.81464093  | 1.20E-18 | 1.60E-17 | Up   |
| circRNA_9324 Chr9:113534327_113546234_+ | 55.908403  | 172.625242 | 0.28546157 | -1.80863157 | -8.79546242 | 1.42E-18 | 1.89E-17 | Down |
| circRNA_4886 Chr2:143506504_143507022_+ | 46.2618356 | 156.652589 | 0.26029159 | -1.94179937 | -8.79032545 | 1.49E-18 | 1.97E-17 | Down |
| circRNA_5775 Chr3:81121255_81143240_+   | 246.004121 | 74.6243374 | 2.9056062  | 1.53883919  | 8.78860492  | 1.51E-18 | 1.99E-17 | Up   |
| circRNA_8852 Chr8:126307382_126317853_- | 79.3712432 | 0          | 139.916211 | 7.12841932  | 8.77800034  | 1.66E-18 | 2.18E-17 | Up   |
| circRNA_0210 Chr1:84060848_84061187_+   | 79.0491593 | 0          | 139.348439 | 7.12255304  | 8.7618651   | 1.92E-18 | 2.51E-17 | Up   |
| circRNA_2063 Chr11:89034506_89036388_-  | 79.0346345 | 0          | 139.322835 | 7.12228792  | 8.76113647  | 1.93E-18 | 2.51E-17 | Up   |
| circRNA_6555 Chr4:157436084_157436365_- | 78.9773058 | 0          | 139.221776 | 7.12124107  | 8.75825978  | 1.98E-18 | 2.56E-17 | Up   |
| circRNA_9499 ChrX:71181191_71183824_+   | 78.9773058 | 0          | 139.221776 | 7.12124107  | 8.75825978  | 1.98E-18 | 2.56E-17 | Up   |
| circRNA_9554 ChrX:114972099_114978572_+ | 166.385997 | 35.9413814 | 4.08034482 | 2.02869108  | 8.75291412  | 2.08E-18 | 2.67E-17 | Up   |
| circRNA_6112 Chr4:6306138_6317357_-     | 174.613577 | 339.612412 | 0.45317852 | -1.14184863 | -8.74314    | 2.27E-18 | 2.88E-17 | Down |
| circRNA_5848 Chr3:112752502_112762808_- | 128.333823 | 20.0201555 | 5.65000125 | 2.49825119  | 8.72652941  | 2.63E-18 | 3.32E-17 | Up   |
| circRNA_6769 Chr5:30077405_30125196_+   | 99.5771287 | 236.815407 | 0.37061629 | -1.4320018  | -8.70684286 | 3.12E-18 | 3.92E-17 | Down |
| circRNA_0731 Chr1:217779008_217782988_- | 70.4519659 | 193.726411 | 0.32053772 | -1.64143396 | -8.7048441  | 3.18E-18 | 3.97E-17 | Down |
| circRNA_2881 Chr14:60538626_60539431_-  | 203.954427 | 54.4170275 | 3.3034914  | 1.72399159  | 8.6819411   | 3.89E-18 | 4.84E-17 | Up   |
| circRNA_6255 Chr4:58367537_58373168_-   | 37.8331858 | 140.144926 | 0.23794161 | -2.07132052 | -8.67197075 | 4.25E-18 | 5.26E-17 | Down |
| circRNA_4963 Chr2:178686506_178699276_+ | 0          | 68.9509153 | 0.00639153 | -7.28962298 | -8.66615686 | 4.47E-18 | 5.52E-17 | Down |
| circRNA_6594 Chr4:171770056_171787877_+ | 385.512978 | 155.462239 | 2.18569189 | 1.12809004  | 8.66071054  | 4.69E-18 | 5.76E-17 | Up   |
| circRNA_1880 Chr11:36400178_36406937_-  | 76.2218294 | 0          | 134.364402 | 7.07000715  | 8.61839169  | 6.79E-18 | 8.31E-17 | Up   |
| circRNA_5698 Chr3:57832689_57850866_+   | 76.1876934 | 0          | 134.304226 | 7.06936089  | 8.61663888  | 6.89E-18 | 8.40E-17 | Up   |
| circRNA_7730 Chr6:108797786_108802113_+ | 239.202904 | 73.2535501 | 2.87814473 | 1.52513914  | 8.60951298  | 7.34E-18 | 8.91E-17 | Up   |
| circRNA_6879 Chr5:78495231_78516521_+   | 303.087699 | 108.309191 | 2.46648148 | 1.30245445  | 8.60204009  | 7.83E-18 | 9.47E-17 | Up   |
| circRNA_6233 Chr4:49232541_49295075_+   | 122.184774 | 18.4756461 | 5.8289766  | 2.54324261  | 8.60091431  | 7.91E-18 | 9.52E-17 | Up   |
| circRNA_1691 Chr10:94311573_94320863_+  | 0          | 67.1700817 | 0.00656098 | -7.25187206 | -8.5650629  | 1.08E-17 | 1.30E-16 | Down |
| circRNA_6611 Chr4:177277503_177292170_- | 75.1852758 | 0          | 132.537157 | 7.05025307  | 8.56494207  | 1.08E-17 | 1.29E-16 | Up   |
| circRNA_0349 Chr1:135860270_135871550_- | 0          | 67.1619637 | 0.00656178 | -7.25169769 | -8.56459816 | 1.08E-17 | 1.29E-16 | Down |
| circRNA_3592 Chr17:718534_739440_+      | 25.6620128 | 116.086007 | 0.1948434  | -2.35961303 | -8.55288346 | 1.20E-17 | 1.42E-16 | Down |
| circRNA_0343 Chr1:133448752_133462521_- | 74.8984008 | 0          | 132.031452 | 7.04473783  | 8.55006652  | 1.23E-17 | 1.45E-16 | Up   |
| circRNA_7546 Chr6:56010933_56036516_+   | 74.771495  | 0          | 131.807741 | 7.04229129  | 8.54347438  | 1.30E-17 | 1.52E-16 | Up   |

|                                          |            |            |            |             |             |          |          |      |
|------------------------------------------|------------|------------|------------|-------------|-------------|----------|----------|------|
| circRNA_4836 Chr2:120517204_120520196_-  | 18.9186229 | 102.662394 | 0.16242504 | -2.622154   | -8.54054042 | 1.34E-17 | 1.56E-16 | Down |
| circRNA_1371 Chr10:51710183_51734014_-   | 139.426291 | 25.9279456 | 4.73970624 | 2.24479765  | 8.54005507  | 1.34E-17 | 1.56E-16 | Up   |
| circRNA_9309 Chr9:112317485_112377503_+  | 74.6970985 | 0          | 131.676595 | 7.04085512  | 8.53960654  | 1.35E-17 | 1.56E-16 | Up   |
| circRNA_3028 Chr14:113954511_113958155_+ | 0          | 66.6428896 | 0.00661289 | -7.24050423 | -8.53480722 | 1.40E-17 | 1.61E-16 | Down |
| circRNA_7570 Chr6:71106931_71122002_-    | 0          | 66.6428896 | 0.00661289 | -7.24050423 | -8.53480722 | 1.40E-17 | 1.61E-16 | Down |
| circRNA_8107 Chr7:76229137_76229533_-    | 238.10152  | 73.8245318 | 2.84273466 | 1.50727944  | 8.51539649  | 1.66E-17 | 1.90E-16 | Up   |
| circRNA_8869 Chr8:128807474_128808790_+  | 236.661231 | 73.2293573 | 2.84850348 | 1.51020417  | 8.50176185  | 1.87E-17 | 2.13E-16 | Up   |
| circRNA_8894 Chr8:132774313_132776792_-  | 0          | 65.9716147 | 0.00668017 | -7.22589869 | -8.49606037 | 1.96E-17 | 2.23E-16 | Down |
| circRNA_5712 Chr3:60029646_60032771_+    | 73.7685988 | 0          | 130.039829 | 7.02280975  | 8.49112626  | 2.05E-17 | 2.31E-16 | Up   |
| circRNA_5110 Chr2:209146114_209152642_-  | 73.7344627 | 0          | 129.979653 | 7.02214199  | 8.48933651  | 2.08E-17 | 2.34E-16 | Up   |
| circRNA_1309 Chr10:43512009_43512284_-   | 90.3477494 | 218.694552 | 0.36412813 | -1.45748189 | -8.47840264 | 2.28E-17 | 2.56E-16 | Down |
| circRNA_1170 Chr10:10837817_10839412_-   | 106.731104 | 241.970757 | 0.38877916 | -1.36297721 | -8.47770515 | 2.30E-17 | 2.57E-16 | Down |
| circRNA_1033 Chr1:265728095_265733260_-  | 73.3384954 | 0          | 129.281639 | 7.01437358  | 8.46853721  | 2.48E-17 | 2.76E-16 | Up   |
| circRNA_8523 Chr8:63433246_63436674_+    | 73.3384954 | 0          | 129.281639 | 7.01437358  | 8.46853721  | 2.48E-17 | 2.76E-16 | Up   |
| circRNA_3642 Chr17:6857810_6877160_+     | 73.2991339 | 0          | 129.212252 | 7.01359907  | 8.46646573  | 2.53E-17 | 2.80E-16 | Up   |
| circRNA_8986 Chr9:37099083_37117919_-    | 0          | 65.4525406 | 0.00673315 | -7.21450247 | -8.46592568 | 2.54E-17 | 2.80E-16 | Down |
| circRNA_3494 Chr16:58790968_58792166_+   | 73.1537479 | 0          | 128.955965 | 7.0107347   | 8.45880834  | 2.70E-17 | 2.96E-16 | Up   |
| circRNA_6040 Chr3:159754051_159754822_-  | 0          | 65.1280339 | 0.0067667  | -7.20733195 | -8.44700891 | 2.99E-17 | 3.25E-16 | Down |
| circRNA_6087 Chr3:176914734_176926722_-  | 0          | 65.0337558 | 0.00677651 | -7.20524202 | -8.44150179 | 3.13E-17 | 3.40E-16 | Down |
| circRNA_4770 Chr2:93523236_93531988_+    | 0          | 65.0189218 | 0.00677806 | -7.2049129  | -8.44063481 | 3.16E-17 | 3.41E-16 | Down |
| circRNA_0371 Chr1:141024396_141026781_+  | 72.7798421 | 0          | 128.296841 | 7.00334184  | 8.43907032  | 3.20E-17 | 3.45E-16 | Up   |
| circRNA_4884 Chr2:141024600_141026192_-  | 72.3717653 | 191.413691 | 0.33325067 | -1.58532034 | -8.43858929 | 3.21E-17 | 3.45E-16 | Down |
| circRNA_0974 Chr1:259396273_259421082_-  | 72.6938491 | 0          | 128.145252 | 7.00163621  | 8.43452173  | 3.33E-17 | 3.56E-16 | Up   |
| circRNA_3901 Chr17:79775882_79789485_-   | 25.6620128 | 114.151035 | 0.19814619 | -2.33536288 | -8.42948501 | 3.47E-17 | 3.67E-16 | Down |
| circRNA_5887 Chr3:121329599_121332424_+  | 34.216017  | 129.722861 | 0.23248118 | -2.10481419 | -8.4291132  | 3.48E-17 | 3.67E-16 | Down |
| circRNA_1864 Chr11:34861207_34922336_+   | 72.4577582 | 0          | 127.729069 | 6.99694309  | 8.42201606  | 3.70E-17 | 3.89E-16 | Up   |
| circRNA_2647 Chr13:101732743_101738842_- | 72.4372482 | 0          | 127.692914 | 6.99653466  | 8.42092843  | 3.74E-17 | 3.91E-16 | Up   |
| circRNA_3463 Chr16:49367616_49369496_+   | 263.392556 | 88.7906326 | 2.61463581 | 1.38661001  | 8.41340148  | 3.98E-17 | 4.15E-16 | Up   |
| circRNA_7370 Chr6:14755038_14758647_-    | 72.1105914 | 0          | 127.117081 | 6.99001409  | 8.40357951  | 4.33E-17 | 4.50E-16 | Up   |
| circRNA_3414 Chr16:21142668_21143130_+   | 146.352364 | 30.0302332 | 4.29552148 | 2.10283329  | 8.40042034  | 4.45E-17 | 4.61E-16 | Up   |
| circRNA_3676 Chr17:15857684_15858717_+   | 146.740177 | 30.2746755 | 4.27212942 | 2.09495535  | 8.39147961  | 4.80E-17 | 4.94E-16 | Up   |
| circRNA_6088 Chr3:177131326_177132323_+  | 71.7844476 | 0          | 126.542152 | 6.98347423  | 8.38620782  | 5.02E-17 | 5.15E-16 | Up   |

|                                          |            |            |            |             |             |          |          |      |
|------------------------------------------|------------|------------|------------|-------------|-------------|----------|----------|------|
| circRNA_6983 Chr5:119207376_119225330_+  | 71.727119  | 0          | 126.441093 | 6.9823216   | 8.38314908  | 5.15E-17 | 5.26E-16 | Up   |
| circRNA_7311 Chr6:2599223_2605598_+      | 193.555673 | 353.960807 | 0.48197619 | -1.05296621 | -8.35895549 | 6.33E-17 | 6.44E-16 | Down |
| circRNA_1530 Chr10:71684888_71702779_+   | 17.1080085 | 96.1540488 | 0.15682191 | -2.67280095 | -8.35140557 | 6.75E-17 | 6.82E-16 | Down |
| circRNA_2491 Chr13:67141798_67143114_-   | 188.88017  | 50.4577925 | 3.29938486 | 1.72219707  | 8.3488103   | 6.90E-17 | 6.95E-16 | Up   |
| circRNA_1024 Chr1:265515390_265524404_-  | 118.299022 | 18.6560843 | 5.58901811 | 2.48259485  | 8.34850669  | 6.91E-17 | 6.94E-16 | Up   |
| circRNA_1852 Chr11:34612627_34616155_+   | 118.161173 | 18.6560843 | 5.58250544 | 2.48091275  | 8.34041854  | 7.40E-17 | 7.41E-16 | Up   |
| circRNA_7671 Chr6:100396828_100397255_+  | 111.309018 | 244.90339  | 0.40059951 | -1.31976745 | -8.32062326 | 8.75E-17 | 8.73E-16 | Down |
| circRNA_0527 Chr1:175700307_175720685_-  | 70.4519659 | 0          | 124.193244 | 6.95644288  | 8.31470769  | 9.20E-17 | 9.14E-16 | Up   |
| circRNA_6232 Chr4:49210934_49232570_+    | 163.656449 | 38.6843578 | 3.72883007 | 1.89872305  | 8.30975236  | 9.59E-17 | 9.50E-16 | Up   |
| circRNA_8354 Chr8:19883715_19890764_+    | 70.2999771 | 0          | 123.925317 | 6.95332714  | 8.30649753  | 9.86E-17 | 9.73E-16 | Up   |
| circRNA_0146 Chr1:47030544_47077979_+    | 17.1080085 | 95.4827738 | 0.15792442 | -2.66269383 | -8.30526552 | 9.96E-17 | 9.80E-16 | Down |
| circRNA_2585 Chr13:86444740_86451001_-   | 69.8359839 | 0          | 123.107386 | 6.94377351  | 8.28136333  | 1.22E-16 | 1.19E-15 | Up   |
| circRNA_3232 Chr15:57348405_57351717_+   | 36.5438932 | 131.243717 | 0.24542068 | -2.02667129 | -8.27492049 | 1.29E-16 | 1.26E-15 | Down |
| circRNA_1548 Chr10:72389570_72417059_-   | 116.067091 | 18.4756461 | 5.53712493 | 2.46913707  | 8.24374939  | 1.67E-16 | 1.62E-15 | Up   |
| circRNA_2107 Chr12:5616151_5632155_-     | 52.6706468 | 157.008701 | 0.29567853 | -1.75789861 | -8.22486193 | 1.95E-16 | 1.89E-15 | Down |
| circRNA_0588 Chr1:188510274_188516444_+  | 164.7847   | 40.2032725 | 3.61268702 | 1.85307227  | 8.2025076   | 2.35E-16 | 2.26E-15 | Up   |
| circRNA_2672 Chr13:106507146_106507561_+ | 185.45571  | 339.301341 | 0.48175862 | -1.05361762 | -8.18812582 | 2.65E-16 | 2.53E-15 | Down |
| circRNA_9245 Chr9:93208928_93239075_+    | 35.5053096 | 127.837584 | 0.24479898 | -2.03033053 | -8.17638809 | 2.92E-16 | 2.77E-15 | Down |
| circRNA_6248 Chr4:57539277_57561542_-    | 96.672632  | 221.384775 | 0.3848847  | -1.37750176 | -8.17482051 | 2.96E-16 | 2.80E-15 | Down |
| circRNA_1341 Chr10:48165219_48194542_-   | 118.795121 | 20.183117  | 5.18782391 | 2.37512951  | 8.15430512  | 3.51E-16 | 3.28E-15 | Up   |
| circRNA_6430 Chr4:123873802_123876481_+  | 132.201607 | 25.9279456 | 4.49410781 | 2.16803474  | 8.13902523  | 3.98E-16 | 3.71E-15 | Up   |
| circRNA_5226 Chr2:244276950_244287544_-  | 136.882355 | 27.9841265 | 4.31132312 | 2.10813069  | 8.1370687   | 4.05E-16 | 3.76E-15 | Up   |
| circRNA_6191 Chr4:28494651_28520904_+    | 67.1862508 | 0          | 118.436417 | 6.88796894  | 8.13575265  | 4.09E-16 | 3.79E-15 | Up   |
| circRNA_5103 Chr2:207356978_207360278_+  | 67.0252089 | 0          | 118.152531 | 6.88450673  | 8.12678603  | 4.41E-16 | 4.07E-15 | Up   |
| circRNA_5054 Chr2:197903224_197913548_-  | 66.664929  | 0          | 117.517427 | 6.87673091  | 8.10667636  | 5.20E-16 | 4.79E-15 | Up   |
| circRNA_0007 Chr1:2375315_2377265_-      | 214.59681  | 66.397827  | 2.84868385 | 1.51029552  | 8.09606231  | 5.68E-16 | 5.21E-15 | Up   |
| circRNA_0808 Chr1:226666019_226667550_+  | 18.3973011 | 94.8835508 | 0.17089842 | -2.54878904 | -8.0829819  | 6.32E-16 | 5.78E-15 | Down |
| circRNA_2646 Chr13:101729059_101732557_- | 191.411379 | 54.5907496 | 3.09046302 | 1.627823    | 8.07500752  | 6.75E-16 | 6.13E-15 | Up   |
| circRNA_5769 Chr3:80713738_80732927_+    | 110.204951 | 17.2852971 | 5.61951864 | 2.49044656  | 8.07232349  | 6.90E-16 | 6.25E-15 | Up   |
| circRNA_0740 Chr1:218758207_218762503_-  | 65.9504592 | 0          | 116.257955 | 6.86118562  | 8.06659156  | 7.23E-16 | 6.53E-15 | Up   |
| circRNA_4154 Chr18:56848012_56853785_-   | 18.3973011 | 94.536797  | 0.17152526 | -2.54350703 | -8.05885106 | 7.70E-16 | 6.93E-15 | Down |
| circRNA_1413 Chr10:59496145_59497395_+   | 0          | 58.6789186 | 0.00751039 | -7.05689556 | -8.0578762  | 7.76E-16 | 6.97E-15 | Down |

|                                         |            |            |            |             |             |          |          |      |
|-----------------------------------------|------------|------------|------------|-------------|-------------|----------|----------|------|
| circRNA_2839 Chr14:43430448_43459087_+  | 44.5806356 | 141.074773 | 0.27852986 | -1.84409611 | -8.05734077 | 7.80E-16 | 6.98E-15 | Down |
| circRNA_8777 Chr8:109250465_109254764_+ | 109.596471 | 17.2852971 | 5.58849131 | 2.48245886  | 8.03530251  | 9.33E-16 | 8.33E-15 | Up   |
| circRNA_7486 Chr6:30134917_30137025_-   | 109.574444 | 17.2852971 | 5.58736814 | 2.48216888  | 8.03396016  | 9.44E-16 | 8.39E-15 | Up   |
| circRNA_6750 Chr5:21884147_21895382_+   | 65.2145945 | 0          | 114.960767 | 6.84499778  | 8.02501675  | 1.02E-15 | 9.00E-15 | Up   |
| circRNA_5164 Chr2:225578381_225591523_+ | 64.9218275 | 0          | 114.444675 | 6.83850653  | 8.00839312  | 1.16E-15 | 1.02E-14 | Up   |
| circRNA_6719 Chr5:8750350_8755507_+     | 64.9218275 | 0          | 114.444675 | 6.83850653  | 8.00839312  | 1.16E-15 | 1.02E-14 | Up   |
| circRNA_1487 Chr10:67579952_67587851_+  | 282.152167 | 105.048542 | 2.36738133 | 1.24329211  | 8.00424113  | 1.20E-15 | 1.04E-14 | Up   |
| circRNA_4415 Chr19:38057557_38091369_+  | 64.6973327 | 0          | 114.048934 | 6.83350915  | 7.99561375  | 1.29E-15 | 1.11E-14 | Up   |
| circRNA_4299 Chr19:17466980_17494680_-  | 64.6591367 | 0          | 113.981602 | 6.83265716  | 7.99343664  | 1.31E-15 | 1.13E-14 | Up   |
| circRNA_4411 Chr19:37754209_37754605_-  | 64.6591367 | 0          | 113.981602 | 6.83265716  | 7.99343664  | 1.31E-15 | 1.13E-14 | Up   |
| circRNA_2867 Chr14:45683767_45691895_-  | 192.833049 | 56.2026211 | 3.02412512 | 1.59651783  | 7.99231749  | 1.32E-15 | 1.13E-14 | Up   |
| circRNA_9493 ChrX:68288275_68292531_-   | 64.5997437 | 0          | 113.876903 | 6.83133136  | 7.9900497   | 1.35E-15 | 1.15E-14 | Up   |
| circRNA_0820 Chr1:235720725_235737635_- | 38.0324237 | 129.049483 | 0.25976019 | -1.94474775 | -7.98634732 | 1.39E-15 | 1.18E-14 | Down |
| circRNA_5072 Chr2:202479064_202480189_+ | 55.9738859 | 157.764815 | 0.31271604 | -1.67707485 | -7.9765241  | 1.51E-15 | 1.28E-14 | Down |
| circRNA_4808 Chr2:113744312_113745181_+ | 138.553568 | 30.0302332 | 4.06662259 | 2.0238311   | 7.97488743  | 1.53E-15 | 1.29E-14 | Up   |
| circRNA_6818 Chr5:60601995_60606533_-   | 64.2976913 | 0          | 113.344443 | 6.82456985  | 7.97279424  | 1.55E-15 | 1.31E-14 | Up   |
| circRNA_4513 Chr2:5411533_5418063_+     | 0          | 57.3148474 | 0.00768914 | -7.02296219 | -7.97211358 | 1.56E-15 | 1.31E-14 | Down |
| circRNA_9548 ChrX:114016360_114041613_+ | 0          | 57.3148474 | 0.00768914 | -7.02296219 | -7.97211358 | 1.56E-15 | 1.31E-14 | Down |
| circRNA_7300 Chr6:906886_907083_+       | 323.169415 | 129.690539 | 2.19632606 | 1.13509225  | 7.96895206  | 1.60E-15 | 1.34E-14 | Up   |
| circRNA_0458 Chr1:162688794_162693133_+ | 64.1398449 | 0          | 113.06619  | 6.82102378  | 7.96375639  | 1.67E-15 | 1.38E-14 | Up   |
| circRNA_1201 Chr10:15358869_15376292_-  | 64.1398449 | 0          | 113.06619  | 6.82102378  | 7.96375639  | 1.67E-15 | 1.38E-14 | Up   |
| circRNA_1234 Chr10:18983478_18984127_+  | 64.1398449 | 0          | 113.06619  | 6.82102378  | 7.96375639  | 1.67E-15 | 1.38E-14 | Up   |
| circRNA_5227 Chr2:244280228_244287544_- | 64.1398449 | 0          | 113.06619  | 6.82102378  | 7.96375639  | 1.67E-15 | 1.38E-14 | Up   |
| circRNA_9501 ChrX:71568020_71568934_+   | 64.1398449 | 0          | 113.06619  | 6.82102378  | 7.96375639  | 1.67E-15 | 1.38E-14 | Up   |
| circRNA_4139 Chr18:48505040_48521166_+  | 0          | 57.151886  | 0.00771106 | -7.01885438 | -7.96178112 | 1.70E-15 | 1.39E-14 | Down |
| circRNA_1128 Chr10:1413338_1427639_-    | 64.0165204 | 0          | 112.848793 | 6.81824718  | 7.95668533  | 1.77E-15 | 1.44E-14 | Up   |
| circRNA_1316 Chr10:46098067_46100778_+  | 64.0165204 | 0          | 112.848793 | 6.81824718  | 7.95668533  | 1.77E-15 | 1.44E-14 | Up   |
| circRNA_4356 Chr19:31905428_31920645_-  | 64.0165204 | 0          | 112.848793 | 6.81824718  | 7.95668533  | 1.77E-15 | 1.44E-14 | Up   |
| circRNA_0896 Chr1:247743814_247766953_+ | 243.627984 | 83.9523795 | 2.55781435 | 1.35491156  | 7.95011751  | 1.86E-15 | 1.51E-14 | Up   |
| circRNA_8962 Chr9:20817077_20849380_+   | 63.8750896 | 0          | 112.599478 | 6.81505633  | 7.94856545  | 1.89E-15 | 1.53E-14 | Up   |
| circRNA_3150 Chr15:37983379_37983882_-  | 63.817761  | 0          | 112.498419 | 6.81376091  | 7.94527082  | 1.94E-15 | 1.56E-14 | Up   |
| circRNA_1702 Chr10:95062921_95074409_-  | 63.6944365 | 0          | 112.281021 | 6.81097028  | 7.93817708  | 2.05E-15 | 1.65E-14 | Up   |

|                                          |            |            |            |             |             |          |          |      |
|------------------------------------------|------------|------------|------------|-------------|-------------|----------|----------|------|
| circRNA_2981 Chr14:106153575_106167943_+ | 63.6799117 | 0          | 112.255417 | 6.81064125  | 7.93734102  | 2.07E-15 | 1.66E-14 | Up   |
| circRNA_3311 Chr15:110036614_110046726_- | 333.899079 | 136.721246 | 2.15255408 | 1.10604948  | 7.93276605  | 2.14E-15 | 1.72E-14 | Up   |
| circRNA_3708 Chr17:26968192_26969252_-   | 38.5496856 | 128.952548 | 0.26349099 | -1.92417446 | -7.9271044  | 2.24E-15 | 1.79E-14 | Down |
| circRNA_3614 Chr17:5511386_5571375_+     | 191.612202 | 339.821817 | 0.49698899 | -1.00871422 | -7.90647103 | 2.65E-15 | 2.10E-14 | Down |
| circRNA_1756 Chr10:109754888_109755050_+ | 253.858334 | 90.2681898 | 2.47874329 | 1.30960886  | 7.90582952  | 2.66E-15 | 2.10E-14 | Up   |
| circRNA_7017 Chr5:128327978_128330004_-  | 175.21367  | 48.1672435 | 3.20620327 | 1.68086589  | 7.9045091   | 2.69E-15 | 2.12E-14 | Up   |
| circRNA_2190 Chr12:17500838_17503558_-   | 0          | 56.1326164 | 0.00785108 | -6.99289258 | -7.89672526 | 2.86E-15 | 2.25E-14 | Down |
| circRNA_6381 Chr4:100760040_100783015_-  | 0          | 56.1244984 | 0.00785222 | -6.99268392 | -7.89620412 | 2.88E-15 | 2.25E-14 | Down |
| circRNA_9327 Chr9:113561405_113562002_+  | 0          | 55.9696549 | 0.00787394 | -6.98869812 | -7.88625449 | 3.11E-15 | 2.43E-14 | Down |
| circRNA_5501 Chr3:2571153_2571724_-      | 0          | 55.9440602 | 0.00787754 | -6.98803824 | -7.88460819 | 3.16E-15 | 2.46E-14 | Down |
| circRNA_7504 Chr6:41822551_41830656_-    | 66.469751  | 171.878586 | 0.34086086 | -1.55274514 | -7.87637996 | 3.37E-15 | 2.61E-14 | Down |
| circRNA_2052 Chr11:87873017_87886449_+   | 0          | 55.7810987 | 0.00790056 | -6.98382962 | -7.87411492 | 3.43E-15 | 2.65E-14 | Down |
| circRNA_8553 Chr8:65282796_65319417_-    | 0          | 55.7810987 | 0.00790056 | -6.98382962 | -7.87411492 | 3.43E-15 | 2.65E-14 | Down |
| circRNA_6971 Chr5:117716189_117747057_-  | 221.800717 | 72.9007916 | 2.68167139 | 1.42313246  | 7.8738724   | 3.44E-15 | 2.65E-14 | Up   |
| circRNA_5715 Chr3:60610877_60628573_-    | 110.3066   | 18.6560843 | 5.21141742 | 2.38167582  | 7.87028294  | 3.54E-15 | 2.72E-14 | Up   |
| circRNA_4672 Chr2:47139938_47143309_-    | 137.160316 | 30.2746755 | 3.99322554 | 1.99755456  | 7.86741066  | 3.62E-15 | 2.77E-14 | Up   |
| circRNA_0263 Chr1:100516688_100517438_-  | 53.1346399 | 151.358785 | 0.30941757 | -1.69237299 | -7.8632823  | 3.74E-15 | 2.86E-14 | Down |
| circRNA_6111 Chr4:6219912_6222632_+      | 62.291899  | 0          | 109.808618 | 6.77884747  | 7.8568808   | 3.94E-15 | 3.00E-14 | Up   |
| circRNA_7191 Chr5:156310667_156314949_+  | 62.2632347 | 0          | 109.758088 | 6.77818345  | 7.85520724  | 3.99E-15 | 3.03E-14 | Up   |
| circRNA_8399 Chr8:32487066_32489431_+    | 19.1138009 | 92.9128292 | 0.18132022 | -2.4633883  | -7.84585158 | 4.30E-15 | 3.25E-14 | Down |
| circRNA_4102 Chr18:32047892_32072938_-   | 61.9698151 | 0          | 109.240846 | 6.77136858  | 7.83804785  | 4.58E-15 | 3.45E-14 | Up   |
| circRNA_1932 Chr11:66082755_66083227_+   | 61.8692973 | 0          | 109.063652 | 6.76902656  | 7.83215764  | 4.80E-15 | 3.61E-14 | Up   |
| circRNA_7453 Chr6:26405813_26406778_+    | 72.4372482 | 179.846612 | 0.35500506 | -1.49408852 | -7.83175178 | 4.81E-15 | 3.61E-14 | Down |
| circRNA_1779 Chr10:110660436_110690679_+ | 19.4358847 | 93.3343515 | 0.18354293 | -2.44581056 | -7.83133668 | 4.83E-15 | 3.61E-14 | Down |
| circRNA_4909 Chr2:148003674_148025257_+  | 169.348567 | 46.1110626 | 3.23706377 | 1.69468579  | 7.81622434  | 5.44E-15 | 4.05E-14 | Up   |
| circRNA_8765 Chr8:107781628_107783028_-  | 109.335297 | 18.6560843 | 5.16552837 | 2.36891593  | 7.81082716  | 5.68E-15 | 4.22E-14 | Up   |
| circRNA_1985 Chr11:70810417_70820621_-   | 44.1453068 | 136.202478 | 0.28567642 | -1.80754615 | -7.80936442 | 5.75E-15 | 4.26E-14 | Down |
| circRNA_4570 Chr2:25786589_25787923_-    | 135.942877 | 30.2746755 | 3.95778155 | 1.98469198  | 7.79934661  | 6.22E-15 | 4.60E-14 | Up   |
| circRNA_7194 Chr5:156506448_156517254_+  | 17.1080085 | 88.2890352 | 0.17079201 | -2.54968763 | -7.79855931 | 6.26E-15 | 4.61E-14 | Down |
| circRNA_2488 Chr13:60462943_60473062_-   | 220.412797 | 73.0663958 | 2.65885086 | 1.41080286  | 7.79783696  | 6.30E-15 | 4.63E-14 | Up   |
| circRNA_4027 Chr18:15480332_15494701_+   | 233.120749 | 80.080622  | 2.56583279 | 1.35942716  | 7.79658214  | 6.36E-15 | 4.66E-14 | Up   |
| circRNA_1230 Chr10:18396548_18408507_-   | 0          | 54.4251455 | 0.00809739 | -6.94832663 | -7.78603693 | 6.91E-15 | 5.06E-14 | Down |



|                                          |            |            |            |             |             |          |          |      |
|------------------------------------------|------------|------------|------------|-------------|-------------|----------|----------|------|
| circRNA_1026 Chr1:265605456_265653628_-  | 135.373141 | 30.2746755 | 3.94119449 | 1.97863295  | 7.76737594  | 8.01E-15 | 5.85E-14 | Up   |
| circRNA_2501 Chr13:68812619_68815978_+   | 130.234011 | 27.9841265 | 4.10192315 | 2.03630046  | 7.76258254  | 8.32E-15 | 6.06E-14 | Up   |
| circRNA_2373 Chr12:51582921_51592889_-   | 18.3973011 | 90.2681898 | 0.17963636 | -2.47684872 | -7.75752052 | 8.66E-15 | 6.29E-14 | Down |
| circRNA_0933 Chr1:253134538_253148277_-  | 17.1080085 | 87.6069996 | 0.17212165 | -2.53849949 | -7.74929977 | 9.24E-15 | 6.69E-14 | Down |
| circRNA_6701 Chr5:7763385_7798747_-      | 72.6278533 | 178.452887 | 0.35871909 | -1.47907358 | -7.74306582 | 9.70E-15 | 7.01E-14 | Down |
| circRNA_8359 Chr8:21663861_21664122_+    | 19.4358847 | 91.9076782 | 0.18639205 | -2.42358779 | -7.73035321 | 1.07E-14 | 7.71E-14 | Down |
| circRNA_4024 Chr18:15319799_15325412_+   | 28.6707013 | 108.67796  | 0.23252609 | -2.10453547 | -7.71446084 | 1.21E-14 | 8.71E-14 | Down |
| circRNA_7638 Chr6:91938501_91945956_-    | 133.009804 | 30.0302332 | 3.90391009 | 1.96491983  | 7.66410318  | 1.80E-14 | 1.29E-13 | Up   |
| circRNA_6628 Chr4:180711145_180722357_-  | 59.9926871 | 158.281937 | 0.33407334 | -1.58176324 | -7.66102631 | 1.84E-14 | 1.32E-13 | Down |
| circRNA_6187 Chr4:28488037_28495139_+    | 343.118853 | 146.985431 | 2.05752514 | 1.04091006  | 7.65389468  | 1.95E-14 | 1.39E-13 | Up   |
| circRNA_8384 Chr8:25644050_25651193_-    | 219.184927 | 74.6257392 | 2.58879045 | 1.37227819  | 7.61441244  | 2.65E-14 | 1.88E-13 | Up   |
| circRNA_2594 Chr13:90652781_90653666_-   | 181.247549 | 54.2365893 | 2.94547018 | 1.55849795  | 7.61396322  | 2.66E-14 | 1.88E-13 | Up   |
| circRNA_0144 Chr1:46959021_46968866_-    | 107.412569 | 224.098708 | 0.42246488 | -1.24309669 | -7.59720086 | 3.03E-14 | 2.13E-13 | Down |
| circRNA_0575 Chr1:185306404_185307538_+  | 36.2218094 | 119.714725 | 0.26668429 | -1.90679527 | -7.5917162  | 3.16E-14 | 2.22E-13 | Down |
| circRNA_4242 Chr18:77477060_77489468_-   | 17.1080085 | 85.2020387 | 0.17698006 | -2.4983413  | -7.57381742 | 3.62E-14 | 2.54E-13 | Down |
| circRNA_1435 Chr10:62566642_62581037_+   | 218.137711 | 74.6142632 | 2.57681805 | 1.36559067  | 7.56794611  | 3.79E-14 | 2.66E-13 | Up   |
| circRNA_7626 Chr6:80306621_80307306_-    | 44.7758136 | 133.125625 | 0.29645357 | -1.75412193 | -7.56214329 | 3.96E-14 | 2.77E-13 | Down |
| circRNA_4295 Chr19:17294202_17298165_+   | 17.1080085 | 84.9555742 | 0.17749349 | -2.49416196 | -7.5556734  | 4.17E-14 | 2.90E-13 | Down |
| circRNA_4637 Chr2:34574151_34576926_+    | 38.2276017 | 122.449583 | 0.27516589 | -1.86162644 | -7.5549768  | 4.19E-14 | 2.91E-13 | Down |
| circRNA_0321 Chr1:127881908_127887913_+  | 168.101246 | 48.1794204 | 3.07527685 | 1.62071629  | 7.54356483  | 4.57E-14 | 3.17E-13 | Up   |
| circRNA_5815 Chr3:104375097_104394775_-  | 145.961123 | 37.3054526 | 3.44857553 | 1.78600056  | 7.52734974  | 5.18E-14 | 3.58E-13 | Up   |
| circRNA_0706 Chr1:209710668_209711353_-  | 56.7518087 | 0          | 100.042506 | 6.64446929  | 7.52387517  | 5.32E-14 | 3.67E-13 | Up   |
| circRNA_8668 Chr8:79639632_79648500_+    | 56.7518087 | 0          | 100.042506 | 6.64446929  | 7.52387517  | 5.32E-14 | 3.67E-13 | Up   |
| circRNA_4209 Chr18:69943105_69944476_-   | 17.1653372 | 84.627699  | 0.17877824 | -2.48375692 | -7.52317212 | 5.35E-14 | 3.67E-13 | Down |
| circRNA_6179 Chr4:27549175_27563899_+    | 56.4297248 | 0          | 99.474734  | 6.63625823  | 7.50389267  | 6.20E-14 | 4.25E-13 | Up   |
| circRNA_1355 Chr10:48452001_48522898_+   | 17.1080085 | 83.9403636 | 0.17964018 | -2.47681806 | -7.48061538 | 7.40E-14 | 5.05E-13 | Down |
| circRNA_2683 Chr13:111138406_111159973_+ | 55.6576941 | 0          | 98.1137925 | 6.61638406  | 7.45569879  | 8.94E-14 | 6.08E-13 | Up   |
| circRNA_3050 Chr15:907065_977590_+       | 55.6576941 | 0          | 98.1137925 | 6.61638406  | 7.45569879  | 8.94E-14 | 6.08E-13 | Up   |
| circRNA_4737 Chr2:62377060_62387024_+    | 103.070973 | 18.4756461 | 4.91712896 | 2.29781619  | 7.4473391   | 9.52E-14 | 6.44E-13 | Up   |
| circRNA_2056 Chr11:87953458_87953999_+   | 55.5198447 | 0          | 97.8707907 | 6.61280645  | 7.44704909  | 9.55E-14 | 6.43E-13 | Up   |
| circRNA_6691 Chr5:7725207_7764306_-      | 55.5198447 | 0          | 97.8707907 | 6.61280645  | 7.44704909  | 9.55E-14 | 6.43E-13 | Up   |
| circRNA_4554 Chr2:23762646_23770766_+    | 55.4625161 | 0          | 97.7697314 | 6.61131598  | 7.44344785  | 9.81E-14 | 6.59E-13 | Up   |

|                                         |            |            |            |             |             |          |          |      |
|-----------------------------------------|------------|------------|------------|-------------|-------------|----------|----------|------|
| circRNA_6447 Chr4:127663314_127709016_- | 107.053188 | 20.183117  | 4.67504962 | 2.22498168  | 7.44261979  | 9.87E-14 | 6.61E-13 | Up   |
| circRNA_6396 Chr4:115636561_115643263_+ | 18.3973011 | 85.818048  | 0.1889515  | -2.40391213 | -7.43451775 | 1.05E-13 | 7.02E-13 | Down |
| circRNA_4611 Chr2:33252541_33258660_-   | 258.080402 | 99.1714215 | 2.29373555 | 1.19769907  | 7.43291551  | 1.06E-13 | 7.09E-13 | Up   |
| circRNA_1077 Chr1:278580846_278661960_+ | 65.4331974 | 162.221978 | 0.3555194  | -1.4919998  | -7.43036149 | 1.08E-13 | 7.21E-13 | Down |
| circRNA_2541 Chr13:76979427_77051919_+  | 55.1977609 | 0          | 97.3030189 | 6.60441266  | 7.42678596  | 1.11E-13 | 7.38E-13 | Up   |
| circRNA_4216 Chr18:71136036_71221192_+  | 55.1977609 | 0          | 97.3030189 | 6.60441266  | 7.42678596  | 1.11E-13 | 7.38E-13 | Up   |
| circRNA_4394 Chr19:34292209_34305849_+  | 54.998523  | 0          | 96.9518008 | 6.59919579  | 7.41421387  | 1.22E-13 | 8.09E-13 | Up   |
| circRNA_1063 Chr1:276295100_276296247_- | 38.5496856 | 120.733444 | 0.28142852 | -1.82915955 | -7.41260161 | 1.24E-13 | 8.15E-13 | Down |
| circRNA_3138 Chr15:37011829_37015530_-  | 54.9411943 | 0          | 96.8507415 | 6.59769119  | 7.41059104  | 1.26E-13 | 8.26E-13 | Up   |
| circRNA_6621 Chr4:180472371_180493153_- | 52.6133181 | 142.613821 | 0.32516885 | -1.62073904 | -7.40096281 | 1.35E-13 | 8.84E-13 | Down |
| circRNA_2896 Chr14:69819129_69863668_+  | 54.6191105 | 0          | 96.2829697 | 6.58920873  | 7.39019259  | 1.47E-13 | 9.53E-13 | Up   |
| circRNA_3209 Chr15:54430708_54444565_-  | 54.6191105 | 0          | 96.2829697 | 6.58920873  | 7.39019259  | 1.47E-13 | 9.53E-13 | Up   |
| circRNA_0517 Chr1:174970502_174971441_- | 54.4812611 | 0          | 96.0399678 | 6.58556302  | 7.38143894  | 1.57E-13 | 1.01E-12 | Up   |
| circRNA_7992 Chr7:47885038_47889037_-   | 54.4812611 | 0          | 96.0399678 | 6.58556302  | 7.38143894  | 1.57E-13 | 1.01E-12 | Up   |
| circRNA_4203 Chr18:69634006_69647714_-  | 17.1080085 | 82.5748762 | 0.18261077 | -2.45315625 | -7.37883225 | 1.60E-13 | 1.03E-12 | Down |
| circRNA_0550 Chr1:178941217_178955232_- | 54.4239325 | 0          | 95.9389085 | 6.58404412  | 7.37779435  | 1.61E-13 | 1.03E-12 | Up   |
| circRNA_3094 Chr15:19979328_19993685_-  | 54.4239325 | 0          | 95.9389085 | 6.58404412  | 7.37779435  | 1.61E-13 | 1.03E-12 | Up   |
| circRNA_1405 Chr10:57627261_57634588_-  | 36.5438932 | 116.881529 | 0.27557752 | -1.85946989 | -7.37540192 | 1.64E-13 | 1.05E-12 | Down |
| circRNA_5819 Chr3:107229486_107246956_+ | 261.810303 | 102.327732 | 2.25511265 | 1.1731995   | 7.36450826  | 1.78E-13 | 1.13E-12 | Up   |
| circRNA_7461 Chr6:27858538_27881618_+   | 118.596269 | 25.9279456 | 4.03160318 | 2.01135364  | 7.34856472  | 2.00E-13 | 1.27E-12 | Up   |
| circRNA_2045 Chr11:86824053_86831108_+  | 182.960189 | 58.0143597 | 2.77968737 | 1.47492263  | 7.34524838  | 2.05E-13 | 1.30E-12 | Up   |
| circRNA_7819 Chr6:129657501_129660096_+ | 215.3556   | 75.7986115 | 2.50420442 | 1.32435233  | 7.3447543   | 2.06E-13 | 1.30E-12 | Up   |
| circRNA_0187 Chr1:78808552_78808927_+   | 53.7092304 | 0          | 94.6790264 | 6.56497297  | 7.33215269  | 2.26E-13 | 1.43E-12 | Up   |
| circRNA_4079 Chr18:28042792_28048198_+  | 53.7092304 | 0          | 94.6790264 | 6.56497297  | 7.33215269  | 2.26E-13 | 1.43E-12 | Up   |
| circRNA_4791 Chr2:110186521_110187022_- | 53.7092304 | 0          | 94.6790264 | 6.56497297  | 7.33215269  | 2.26E-13 | 1.43E-12 | Up   |
| circRNA_6455 Chr4:130390407_130403303_+ | 53.7092304 | 0          | 94.6790264 | 6.56497297  | 7.33215269  | 2.26E-13 | 1.43E-12 | Up   |
| circRNA_5137 Chr2:219382723_219427368_- | 262.721275 | 103.436671 | 2.23869829 | 1.16266011  | 7.32440455  | 2.40E-13 | 1.50E-12 | Up   |
| circRNA_1088 Chr1:278731694_278773472_+ | 47.5511282 | 133.532244 | 0.3138698  | -1.67176185 | -7.32184461 | 2.45E-13 | 1.53E-12 | Down |
| circRNA_0123 Chr1:40433889_40459139_+   | 19.1138009 | 85.4875301 | 0.19706938 | -2.34322448 | -7.30932921 | 2.68E-13 | 1.67E-12 | Down |
| circRNA_0212 Chr1:84418344_84431239_+   | 28.6707013 | 102.59839  | 0.24630466 | -2.02148417 | -7.30414034 | 2.79E-13 | 1.73E-12 | Down |
| circRNA_1215 Chr10:16724062_16731902_-  | 53.1919686 | 0          | 93.7671934 | 6.55101135  | 7.29887941  | 2.90E-13 | 1.80E-12 | Up   |
| circRNA_8805 Chr8:117140355_117143566_+ | 17.1653372 | 81.5353222 | 0.18555874 | -2.43005217 | -7.29231925 | 3.05E-13 | 1.88E-12 | Down |

|                                         |            |            |            |             |             |          |          |      |
|-----------------------------------------|------------|------------|------------|-------------|-------------|----------|----------|------|
| circRNA_1484 Chr10:67363508_67364610_+  | 18.9186229 | 84.7698257 | 0.19670848 | -2.34586892 | -7.2834566  | 3.25E-13 | 2.01E-12 | Down |
| circRNA_3181 Chr15:48268665_48284550_-  | 214.613364 | 76.1527718 | 2.48396748 | 1.31264629  | 7.2820344   | 3.29E-13 | 2.02E-12 | Up   |
| circRNA_4090 Chr18:29457228_29458435_+  | 100.279104 | 18.4756461 | 4.78393936 | 2.2581991   | 7.26886272  | 3.63E-13 | 2.23E-12 | Up   |
| circRNA_8479 Chr8:57791873_57797597_-   | 97.3746069 | 17.2852971 | 4.96527981 | 2.31187502  | 7.26517852  | 3.73E-13 | 2.28E-12 | Up   |
| circRNA_1939 Chr11:67672962_67674360_-  | 52.6706468 | 0          | 92.8482035 | 6.53680209  | 7.26513711  | 3.73E-13 | 2.28E-12 | Up   |
| circRNA_7861 Chr6:137924572_137936007_+ | 127.40278  | 243.33787  | 0.46147062 | -1.11568928 | -7.26390004 | 3.76E-13 | 2.29E-12 | Down |
| circRNA_6105 Chr4:5644287_5652694_+     | 57.9855703 | 148.118347 | 0.3450531  | -1.5351097  | -7.25076243 | 4.14E-13 | 2.52E-12 | Down |
| circRNA_3329 Chr16:2138232_2171786_-    | 250.659607 | 97.7066761 | 2.26117916 | 1.1770753   | 7.2248987   | 5.01E-13 | 3.04E-12 | Up   |
| circRNA_3983 Chr18:2022082_2047808_+    | 19.1138009 | 84.1867476 | 0.20011433 | -2.32110363 | -7.2126247  | 5.49E-13 | 3.32E-12 | Down |
| circRNA_0719 Chr1:215905137_215918638_- | 103.3678   | 20.183117  | 4.51410746 | 2.17444076  | 7.21013214  | 5.59E-13 | 3.37E-12 | Up   |
| circRNA_4065 Chr18:27261576_27278436_-  | 96.1713073 | 17.2852971 | 4.90392173 | 2.29393595  | 7.18642874  | 6.65E-13 | 3.99E-12 | Up   |
| circRNA_2486 Chr13:57308610_57315386_+  | 96.142643  | 17.2852971 | 4.90246009 | 2.29350589  | 7.18454596  | 6.74E-13 | 4.03E-12 | Up   |
| circRNA_4719 Chr2:57320683_57321619_+   | 25.6620128 | 95.5790886 | 0.23664792 | -2.07918586 | -7.17893103 | 7.03E-13 | 4.19E-12 | Down |
| circRNA_0747 Chr1:218838080_218844420_- | 164.85156  | 50.2133502 | 2.89366814 | 1.53289947  | 7.17386913  | 7.29E-13 | 4.33E-12 | Up   |
| circRNA_1169 Chr10:10811936_10814828_+  | 99.1997461 | 18.6560843 | 4.68667591 | 2.22856503  | 7.17149646  | 7.42E-13 | 4.39E-12 | Up   |
| circRNA_2126 Chr12:5733574_5773035_-    | 53.3871465 | 139.885745 | 0.33638615 | -1.57180979 | -7.16907772 | 7.55E-13 | 4.46E-12 | Down |
| circRNA_4638 Chr2:35086861_35104742_-   | 191.447545 | 64.6008274 | 2.61208063 | 1.38519943  | 7.16721117  | 7.65E-13 | 4.52E-12 | Up   |
| circRNA_0186 Chr1:78518319_78522187_-   | 25.6620128 | 95.3905324 | 0.2371157  | -2.07633693 | -7.16555583 | 7.75E-13 | 4.56E-12 | Down |
| circRNA_5489 Chr3:1981290_2008447_-     | 98.5640139 | 18.4756461 | 4.70211887 | 2.23331101  | 7.15781305  | 8.20E-13 | 4.82E-12 | Up   |
| circRNA_5693 Chr3:56199666_56213623_+   | 18.9186229 | 83.0764735 | 0.200718   | -2.31675808 | -7.15687757 | 8.25E-13 | 4.84E-12 | Down |
| circRNA_9580 ChrX:135406401_135428629_- | 66.9276199 | 159.483046 | 0.36988415 | -1.43485463 | -7.15570058 | 8.32E-13 | 4.87E-12 | Down |
| circRNA_1030 Chr1:265714699_265724208_- | 70.4519659 | 164.426903 | 0.37765488 | -1.40485968 | -7.15096455 | 8.62E-13 | 5.03E-12 | Down |
| circRNA_8552 Chr8:65282796_65283243_-   | 102.034187 | 20.0201555 | 4.49213832 | 2.16740235  | 7.14899502  | 8.74E-13 | 5.10E-12 | Up   |
| circRNA_6445 Chr4:127663314_127682607_- | 175.61308  | 56.2026211 | 2.75407109 | 1.4615658   | 7.14759906  | 8.83E-13 | 5.14E-12 | Up   |
| circRNA_2000 Chr11:72245130_72274521_-  | 138.352687 | 36.9512922 | 3.30014349 | 1.72252876  | 7.1462538   | 8.92E-13 | 5.18E-12 | Up   |
| circRNA_4187 Chr18:63098146_63108006_+  | 56.2304869 | 143.557776 | 0.3452391  | -1.53433221 | -7.13560032 | 9.64E-13 | 5.59E-12 | Down |
| circRNA_1907 Chr11:53511143_53519258_-  | 19.4358847 | 83.6898402 | 0.20469462 | -2.28845489 | -7.13038156 | 1.00E-12 | 5.79E-12 | Down |
| circRNA_7589 Chr6:73742698_73744458_+   | 143.913658 | 40.040311  | 3.1679581  | 1.66355326  | 7.11123679  | 1.15E-12 | 6.64E-12 | Up   |
| circRNA_0107 Chr1:29457380_29462756_+   | 17.1080085 | 79.0424738 | 0.19077163 | -2.39008145 | -7.11095788 | 1.15E-12 | 6.64E-12 | Down |
| circRNA_4624 Chr2:34373875_34404958_+   | 119.717018 | 230.104765 | 0.45856947 | -1.12478779 | -7.10997886 | 1.16E-12 | 6.68E-12 | Down |
| circRNA_6710 Chr5:7830490_7872679_-     | 151.865167 | 270.953002 | 0.49401378 | -1.01737681 | -7.10975929 | 1.16E-12 | 6.67E-12 | Down |
| circRNA_0279 Chr1:102638885_102660697_- | 97.9532573 | 18.6642023 | 4.62577291 | 2.20969444  | 7.08909766  | 1.35E-12 | 7.73E-12 | Up   |

|                                          |            |            |            |             |             |          |          |      |
|------------------------------------------|------------|------------|------------|-------------|-------------|----------|----------|------|
| circRNA_2963 Chr14:88724076_88725530_-   | 136.979046 | 251.652654 | 0.4797638  | -1.05960378 | -7.08416809 | 1.40E-12 | 8.00E-12 | Down |
| circRNA_7130 Chr5:147358172_147368505_-  | 100.7497   | 20.183117  | 4.39977412 | 2.13742946  | 7.04209589  | 1.89E-12 | 1.08E-11 | Up   |
| circRNA_2651 Chr13:102731643_102745681_- | 100.626375 | 20.183117  | 4.3943885  | 2.13566242  | 7.0341198   | 2.01E-12 | 1.14E-11 | Up   |
| circRNA_9469 ChrX:53416067_53421284_+    | 208.617629 | 75.8079703 | 2.42555426 | 1.27831445  | 7.03352646  | 2.01E-12 | 1.14E-11 | Up   |
| circRNA_7142 Chr5:148844953_148847692_+  | 19.4358847 | 82.052444  | 0.2087794  | -2.2599487  | -7.00686273 | 2.44E-12 | 1.38E-11 | Down |
| circRNA_8416 Chr8:36673405_36682424_+    | 17.1653372 | 77.5154411 | 0.19518164 | -2.35711071 | -6.98458279 | 2.86E-12 | 1.61E-11 | Down |
| circRNA_6679 Chr5:6082465_6083085_-      | 29.1538271 | 98.8007103 | 0.26008204 | -1.94296131 | -6.98364243 | 2.88E-12 | 1.62E-11 | Down |
| circRNA_3099 Chr15:23792824_23801848_+   | 158.732727 | 48.9307598 | 2.85929771 | 1.51566084  | 6.98112242  | 2.93E-12 | 1.64E-11 | Up   |
| circRNA_4357 Chr19:32214551_32215127_+   | 116.496562 | 27.9841265 | 3.66924078 | 1.87548158  | 6.95302299  | 3.58E-12 | 1.99E-11 | Up   |
| circRNA_3912 Chr17:83502435_83539887_+   | 111.822664 | 25.9279456 | 3.80133885 | 1.92650763  | 6.93584194  | 4.04E-12 | 2.25E-11 | Up   |
| circRNA_8140 Chr7:95149972_95166554_+    | 95.1404523 | 18.4756461 | 4.53879361 | 2.18230889  | 6.93280391  | 4.13E-12 | 2.29E-11 | Up   |
| circRNA_0520 Chr1:175171303_175218889_-  | 120.573397 | 30.2746755 | 3.51032122 | 1.81160306  | 6.90877631  | 4.89E-12 | 2.71E-11 | Up   |
| circRNA_4865 Chr2:128562842_128636580_-  | 94.7801725 | 18.6560843 | 4.47787387 | 2.16281389  | 6.88105704  | 5.94E-12 | 3.28E-11 | Up   |
| circRNA_7704 Chr6:104844523_104864968_+  | 17.1080085 | 75.9709318 | 0.19848462 | -2.33290086 | -6.8723975  | 6.31E-12 | 3.47E-11 | Down |
| circRNA_1127 Chr10:1413338_1419399_-     | 25.6620128 | 91.2175247 | 0.24796323 | -2.01180187 | -6.86562829 | 6.62E-12 | 3.63E-11 | Down |
| circRNA_7841 Chr6:135234357_135235783_-  | 17.1653372 | 75.9642157 | 0.19916735 | -2.32794695 | -6.86339037 | 6.72E-12 | 3.68E-11 | Down |
| circRNA_0545 Chr1:177569617_177569872_+  | 131.001982 | 35.9494994 | 3.21188419 | 1.68341987  | 6.84214348  | 7.80E-12 | 4.26E-11 | Up   |
| circRNA_3437 Chr16:26755422_26767549_+   | 27.5959516 | 93.7753029 | 0.25937718 | -1.94687656 | -6.81279353 | 9.57E-12 | 5.19E-11 | Down |
| circRNA_5648 Chr3:44500847_44522988_-    | 137.321126 | 245.977129 | 0.49205935 | -1.02309577 | -6.80542675 | 1.01E-11 | 5.45E-11 | Down |
| circRNA_6400 Chr4:115820712_115833021_+  | 89.7358618 | 184.304171 | 0.42914666 | -1.22045734 | -6.79074551 | 1.12E-11 | 6.00E-11 | Down |
| circRNA_1533 Chr10:72171107_72179123_-   | 93.329838  | 18.6560843 | 4.40935305 | 2.140567    | 6.78407311  | 1.17E-11 | 6.27E-11 | Up   |
| circRNA_1740 Chr10:106264856_106265494_+ | 80.2665984 | 171.313696 | 0.41296917 | -1.27589401 | -6.77896704 | 1.21E-11 | 6.48E-11 | Down |
| circRNA_2527 Chr13:74485162_74513464_-   | 132.183799 | 37.1317305 | 3.13767458 | 1.64969573  | 6.77473097  | 1.25E-11 | 6.66E-11 | Up   |
| circRNA_6236 Chr4:49413414_49426775_-    | 96.1790359 | 20.0201555 | 4.23436052 | 2.08214411  | 6.767054    | 1.31E-11 | 7.01E-11 | Up   |
| circRNA_7449 Chr6:25903936_25912817_-    | 114.478748 | 216.049212 | 0.46703244 | -1.09840534 | -6.75861259 | 1.39E-11 | 7.42E-11 | Down |
| circRNA_4804 Chr2:113322714_113345579_-  | 112.511152 | 27.7134692 | 3.57832295 | 1.8392836   | 6.74333443  | 1.55E-11 | 8.16E-11 | Up   |
| circRNA_3207 Chr15:52636357_52638595_+   | 96.081447  | 20.183117  | 4.19590992 | 2.06898371  | 6.73621495  | 1.63E-11 | 8.55E-11 | Up   |
| circRNA_6196 Chr4:31220330_31283358_+    | 112.827111 | 27.9841265 | 3.55366571 | 1.82930798  | 6.72779254  | 1.72E-11 | 9.03E-11 | Up   |
| circRNA_2698 Chr14:2924636_2991160_+     | 92.4563562 | 18.6560843 | 4.36808555 | 2.12700111  | 6.72525004  | 1.75E-11 | 9.17E-11 | Up   |
| circRNA_9418 ChrX:33498876_33500582_-    | 92.4129348 | 18.6560843 | 4.36603411 | 2.1263234   | 6.72231769  | 1.79E-11 | 9.34E-11 | Up   |
| circRNA_7440 Chr6:22373412_22407626_+    | 123.065284 | 226.129375 | 0.47968201 | -1.05984975 | -6.71652991 | 1.86E-11 | 9.70E-11 | Down |
| circRNA_4002 Chr18:5059054_5061806_-     | 182.41403  | 64.7752649 | 2.48212643 | 1.3115766   | 6.7092801   | 1.96E-11 | 1.02E-10 | Up   |

|                                          |            |            |            |             |             |          |          |      |
|------------------------------------------|------------|------------|------------|-------------|-------------|----------|----------|------|
| circRNA_0148 Chr1:47915029_47916946_-    | 64.2333395 | 147.775652 | 0.38311793 | -1.38413956 | -6.70322474 | 2.04E-11 | 1.06E-10 | Down |
| circRNA_4771 Chr2:93575111_93581750_-    | 144.861769 | 44.4035917 | 2.87548126 | 1.52380344  | 6.69547484  | 2.15E-11 | 1.11E-10 | Up   |
| circRNA_3851 Chr17:79335091_79352484_-   | 28.3779343 | 93.448844  | 0.26765891 | -1.90153242 | -6.6949277  | 2.16E-11 | 1.12E-10 | Down |
| circRNA_2615 Chr13:96986684_97023051_-   | 118.83236  | 219.929083 | 0.47624115 | -1.07023581 | -6.6766755  | 2.44E-11 | 1.26E-10 | Down |
| circRNA_7518 Chr6:44055353_44060029_+    | 200.568356 | 75.556276  | 2.33973531 | 1.22634533  | 6.67597077  | 2.46E-11 | 1.26E-10 | Up   |
| circRNA_3301 Chr15:109120332_109141568_+ | 136.670588 | 40.366234  | 2.98422584 | 1.57735672  | 6.66977942  | 2.56E-11 | 1.31E-10 | Up   |
| circRNA_3738 Chr17:38026513_38080864_+   | 222.706537 | 88.9710708 | 2.20627176 | 1.1416105   | 6.64561975  | 3.02E-11 | 1.54E-10 | Up   |
| circRNA_4224 Chr18:72593000_72597936_+   | 90.8424712 | 18.4756461 | 4.33375308 | 2.11561696  | 6.64370694  | 3.06E-11 | 1.56E-10 | Up   |
| circRNA_3733 Chr17:36113611_36121325_-   | 91.2203323 | 18.6642023 | 4.30781531 | 2.1069564   | 6.64021536  | 3.13E-11 | 1.59E-10 | Up   |
| circRNA_1670 Chr10:92424212_92432295_-   | 110.602948 | 27.7134692 | 3.51763414 | 1.81460544  | 6.62446627  | 3.49E-11 | 1.76E-10 | Up   |
| circRNA_1357 Chr10:48460656_48470732_+   | 212.241168 | 83.0879495 | 2.25147145 | 1.17086818  | 6.62018837  | 3.59E-11 | 1.81E-10 | Up   |
| circRNA_7378 Chr6:19003638_19033483_+    | 42.7700213 | 115.000091 | 0.32780543 | -1.60908835 | -6.61144922 | 3.81E-11 | 1.92E-10 | Down |
| circRNA_8091 Chr7:73684650_73698020_-    | 110.259737 | 27.7134692 | 3.50671859 | 1.81012166  | 6.60296497  | 4.03E-11 | 2.02E-10 | Up   |
| circRNA_6321 Chr4:67449579_67455064_-    | 90.6405164 | 18.6560843 | 4.28229649 | 2.09838469  | 6.60194864  | 4.06E-11 | 2.03E-10 | Up   |
| circRNA_7991 Chr7:47865531_47889037_-    | 146.882086 | 46.4597726 | 2.78654853 | 1.47847928  | 6.59305478  | 4.31E-11 | 2.16E-10 | Up   |
| circRNA_3801 Chr17:65713487_65718285_-   | 164.23713  | 55.9581789 | 2.58691782 | 1.37123423  | 6.58731     | 4.48E-11 | 2.24E-10 | Up   |
| circRNA_4518 Chr2:5639643_5640909_+      | 17.1080085 | 72.2974991 | 0.20856962 | -2.26139909 | -6.57972847 | 4.71E-11 | 2.35E-10 | Down |
| circRNA_5513 Chr3:3785953_3786880_+      | 144.309753 | 45.2694236 | 2.8097364  | 1.49043479  | 6.57427297  | 4.89E-11 | 2.42E-10 | Up   |
| circRNA_8495 Chr8:60059164_60076960_-    | 46.5145745 | 119.68913  | 0.34253835 | -1.54566258 | -6.55064298 | 5.73E-11 | 2.83E-10 | Down |
| circRNA_1115 Chr10:805713_835214_+       | 175.788261 | 62.8792379 | 2.46409506 | 1.30105792  | 6.54539068  | 5.93E-11 | 2.93E-10 | Up   |
| circRNA_7195 Chr5:157690578_157712883_+  | 86.4610936 | 17.2852971 | 4.40878311 | 2.14038051  | 6.52929338  | 6.61E-11 | 3.26E-10 | Up   |
| circRNA_7256 Chr5:167547693_167558250_+  | 181.448852 | 66.2941796 | 2.41242423 | 1.27048363  | 6.52817948  | 6.66E-11 | 3.28E-10 | Up   |
| circRNA_0296 Chr1:114597220_114599418_+  | 147.708517 | 47.5599725 | 2.73740339 | 1.45280805  | 6.52574705  | 6.77E-11 | 3.32E-10 | Up   |
| circRNA_4541 Chr2:22038220_22044780_-    | 18.3973011 | 73.9322276 | 0.21932856 | -2.18883443 | -6.52169253 | 6.95E-11 | 3.40E-10 | Down |
| circRNA_1810 Chr11:24491881_24498116_-   | 92.3144469 | 20.183117  | 4.03140373 | 2.01128227  | 6.48319739  | 8.98E-11 | 4.38E-10 | Up   |
| circRNA_3866 Chr17:79373151_79396859_-   | 92.2518928 | 20.183117  | 4.02867197 | 2.01030434  | 6.47894704  | 9.24E-11 | 4.49E-10 | Up   |
| circRNA_9563 ChrX:119208336_119213196_-  | 45.4859428 | 116.992043 | 0.3426855  | -1.54504293 | -6.47450965 | 9.51E-11 | 4.62E-10 | Down |
| circRNA_4858 Chr2:127855809_127869951_+  | 88.6972782 | 18.6560843 | 4.19048852 | 2.06711844  | 6.46843595  | 9.90E-11 | 4.80E-10 | Up   |
| circRNA_4744 Chr2:62955690_62973365_+    | 117.740369 | 214.233329 | 0.48441013 | -1.04569907 | -6.4659997  | 1.01E-10 | 4.87E-10 | Down |
| circRNA_3977 Chr18:2005294_2013322_+     | 156.716983 | 53.2266785 | 2.59514455 | 1.3758149   | 6.4510907   | 1.11E-10 | 5.35E-10 | Up   |
| circRNA_1541 Chr10:72359922_72371397_-   | 91.7477784 | 20.183117  | 4.00665712 | 2.00239905  | 6.44463453  | 1.16E-10 | 5.57E-10 | Up   |
| circRNA_3447 Chr16:32120310_32121085_-   | 63.3698441 | 142.028787 | 0.39326122 | -1.34644018 | -6.43449306 | 1.24E-10 | 5.94E-10 | Down |

|                                         |            |            |            |             |             |          |          |      |
|-----------------------------------------|------------|------------|------------|-------------|-------------|----------|----------|------|
| circRNA_7328 Chr6:3328492_3345418_-     | 107.543815 | 27.7134692 | 3.42034098 | 1.77414016  | 6.43148311  | 1.26E-10 | 6.05E-10 | Up   |
| circRNA_2196 Chr12:22237823_22238433_-  | 19.4358847 | 74.6082625 | 0.22961077 | -2.12273781 | -6.42680093 | 1.30E-10 | 6.23E-10 | Down |
| circRNA_2240 Chr12:25226326_25234184_+  | 54.418707  | 129.205728 | 0.3712285  | -1.42962063 | -6.42300892 | 1.34E-10 | 6.37E-10 | Down |
| circRNA_0838 Chr1:238998947_239014340_- | 248.303067 | 107.659942 | 2.03283814 | 1.02349535  | 6.42128218  | 1.35E-10 | 6.44E-10 | Up   |
| circRNA_2073 Chr11:89328437_89332868_-  | 38.0324237 | 104.885581 | 0.31960464 | -1.64563975 | -6.41664666 | 1.39E-10 | 6.62E-10 | Down |
| circRNA_8606 Chr8:70535555_70547228_+   | 90.9205422 | 20.0201555 | 4.00285104 | 2.00102793  | 6.41264435  | 1.43E-10 | 6.79E-10 | Up   |
| circRNA_0429 Chr1:154405931_154425509_+ | 120.248805 | 216.138025 | 0.49037063 | -1.02805553 | -6.40465749 | 1.51E-10 | 7.14E-10 | Down |
| circRNA_0676 Chr1:204773090_204780713_- | 195.014408 | 75.8079703 | 2.26739241 | 1.18103409  | 6.38963302  | 1.66E-10 | 7.87E-10 | Up   |
| circRNA_0096 Chr1:25716606_25787662_-   | 128.40935  | 38.6762398 | 2.9263567  | 1.54910564  | 6.38041153  | 1.77E-10 | 8.33E-10 | Up   |
| circRNA_0962 Chr1:256710536_256734892_- | 90.3211495 | 20.0201555 | 3.97646229 | 1.99148549  | 6.37151897  | 1.87E-10 | 8.81E-10 | Up   |
| circRNA_3664 Chr17:10096739_10107746_+  | 178.726134 | 66.6603663 | 2.36317141 | 1.24072428  | 6.35996485  | 2.02E-10 | 9.49E-10 | Up   |
| circRNA_6422 Chr4:119077003_119083375_- | 19.1138009 | 73.0893478 | 0.23049835 | -2.11717165 | -6.35048494 | 2.15E-10 | 1.01E-09 | Down |
| circRNA_5387 Chr20:22822066_22856689_-  | 86.9726568 | 18.6642023 | 4.10722185 | 2.03816288  | 6.34728607  | 2.19E-10 | 1.03E-09 | Up   |
| circRNA_5373 Chr20:14335985_14342412_-  | 110.875719 | 30.0302332 | 3.25426265 | 1.70233069  | 6.34450129  | 2.23E-10 | 1.04E-09 | Up   |
| circRNA_4425 Chr19:39543248_39545672_+  | 61.8119687 | 138.365509 | 0.39374911 | -1.34465142 | -6.34449182 | 2.23E-10 | 1.04E-09 | Down |
| circRNA_3255 Chr15:61826710_61827008_+  | 162.553001 | 57.651531  | 2.48518661 | 1.31335419  | 6.340102    | 2.30E-10 | 1.07E-09 | Up   |
| circRNA_1949 Chr11:68745884_68750272_-  | 220.795172 | 91.8935596 | 2.11777276 | 1.08254779  | 6.33925434  | 2.31E-10 | 1.07E-09 | Up   |
| circRNA_8277 Chr7:132867046_132873732_+ | 102.29305  | 25.9279456 | 3.47738583 | 1.79800315  | 6.33063808  | 2.44E-10 | 1.13E-09 | Up   |
| circRNA_2811 Chr14:37251286_37254001_-  | 83.6330582 | 17.2852971 | 4.26457727 | 2.09240274  | 6.33008668  | 2.45E-10 | 1.13E-09 | Up   |
| circRNA_7349 Chr6:8257474_8261060_+     | 38.0324237 | 103.518151 | 0.32382648 | -1.62670715 | -6.32204856 | 2.58E-10 | 1.19E-09 | Down |
| circRNA_7084 Chr5:139401645_139421497_+ | 89.6025853 | 20.0201555 | 3.94482692 | 1.979962    | 6.32201359  | 2.58E-10 | 1.19E-09 | Up   |
| circRNA_0666 Chr1:203272587_203286711_+ | 204.238794 | 82.1305667 | 2.19183711 | 1.13214059  | 6.32165609  | 2.59E-10 | 1.19E-09 | Up   |
| circRNA_0060 Chr1:15545013_15551204_+   | 19.4358847 | 73.2293573 | 0.23393433 | -2.09582453 | -6.31579336 | 2.69E-10 | 1.23E-09 | Down |
| circRNA_7983 Chr7:41167312_41178782_+   | 83.3109744 | 17.2852971 | 4.24815373 | 2.08683597  | 6.30715835  | 2.84E-10 | 1.30E-09 | Up   |
| circRNA_3227 Chr15:56804970_56818325_-  | 80.7505886 | 163.408254 | 0.43555857 | -1.19906135 | -6.30540542 | 2.87E-10 | 1.31E-09 | Down |
| circRNA_8026 Chr7:60397574_60401897_-   | 17.1653372 | 68.7704771 | 0.22000126 | -2.18441634 | -6.28201424 | 3.34E-10 | 1.52E-09 | Down |
| circRNA_9581 ChrX:135406401_135436054_- | 85.6176879 | 18.4756461 | 4.08449829 | 2.03015888  | 6.28162266  | 3.35E-10 | 1.52E-09 | Up   |
| circRNA_0476 Chr1:165366392_165367044_- | 100.743097 | 188.776774 | 0.47037214 | -1.08812547 | -6.26962307 | 3.62E-10 | 1.64E-09 | Down |
| circRNA_4786 Chr2:104882050_104908155_+ | 42.8273499 | 109.693171 | 0.34412519 | -1.53899457 | -6.25128528 | 4.07E-10 | 1.84E-09 | Down |
| circRNA_6529 Chr4:152465373_152468818_- | 85.5835519 | 18.6560843 | 4.04338102 | 2.01556216  | 6.25100679  | 4.08E-10 | 1.84E-09 | Up   |
| circRNA_8160 Chr7:102723273_102724348_+ | 72.8785622 | 151.726455 | 0.42336343 | -1.24003143 | -6.23896619 | 4.40E-10 | 1.98E-09 | Down |
| circRNA_8343 Chr8:6135492_6161740_-     | 19.1138009 | 71.7023246 | 0.23495716 | -2.08953038 | -6.23762446 | 4.44E-10 | 1.99E-09 | Down |

|                                         |            |            |            |             |             |          |          |      |
|-----------------------------------------|------------|------------|------------|-------------|-------------|----------|----------|------|
| circRNA_1796 Chr11:10020678_10022991_+  | 125.692916 | 38.6843578 | 2.86385001 | 1.51795593  | 6.21910647  | 5.00E-10 | 2.23E-09 | Up   |
| circRNA_8442 Chr8:48582552_48597919_-   | 83.5725341 | 165.501281 | 0.44507897 | -1.16786677 | -6.21407933 | 5.16E-10 | 2.30E-09 | Down |
| circRNA_3776 Chr17:55367271_55376891_-  | 104.696647 | 27.9841265 | 3.29758408 | 1.72140944  | 6.21368654  | 5.18E-10 | 2.31E-09 | Up   |
| circRNA_4445 Chr19:43120530_43124021_-  | 147.324952 | 50.4577925 | 2.57349258 | 1.36372762  | 6.21283031  | 5.20E-10 | 2.31E-09 | Up   |
| circRNA_3325 Chr16:2121549_2126628_-    | 100.489039 | 25.9279456 | 3.41605963 | 1.77233316  | 6.21255786  | 5.21E-10 | 2.31E-09 | Up   |
| circRNA_9401 ChrX:20517911_20536573_+   | 233.402805 | 101.406099 | 2.02869544 | 1.0205523   | 6.21087252  | 5.27E-10 | 2.34E-09 | Up   |
| circRNA_9167 Chr9:73766839_73805835_-   | 114.837191 | 205.390744 | 0.49280664 | -1.02090639 | -6.20764023 | 5.38E-10 | 2.38E-09 | Down |
| circRNA_3377 Chr16:8416756_8421217_+    | 104.599764 | 27.9841265 | 3.29453258 | 1.72007379  | 6.20742836  | 5.39E-10 | 2.38E-09 | Up   |
| circRNA_9511 ChrX:79925629_80009757_+   | 44.7039602 | 111.745994 | 0.35260535 | -1.50387374 | -6.20316514 | 5.53E-10 | 2.44E-09 | Down |
| circRNA_3390 Chr16:11046372_11051389_+  | 59.9640228 | 133.229273 | 0.39670344 | -1.3338672  | -6.18723447 | 6.12E-10 | 2.70E-09 | Down |
| circRNA_2599 Chr13:95003382_95013012_+  | 87.6173031 | 20.183117  | 3.82627784 | 1.93594164  | 6.15939846  | 7.30E-10 | 3.21E-09 | Up   |
| circRNA_9358 Chr9:119805160_119807029_- | 36.0266314 | 97.9469749 | 0.32419588 | -1.62506235 | -6.14509819 | 7.99E-10 | 3.50E-09 | Down |
| circRNA_9304 Chr9:112023471_112027242_- | 62.944047  | 136.605738 | 0.4061258  | -1.30000142 | -6.14202812 | 8.15E-10 | 3.56E-09 | Down |
| circRNA_2502 Chr13:69016108_69031223_+  | 73.3958241 | 150.398041 | 0.43013426 | -1.21714106 | -6.12116296 | 9.29E-10 | 4.05E-09 | Down |
| circRNA_8688 Chr8:85436186_85452774_+   | 222.598531 | 96.0099658 | 2.04352915 | 1.03106282  | 6.11671152  | 9.55E-10 | 4.16E-09 | Up   |
| circRNA_0816 Chr1:233570084_233581182_+ | 17.1653372 | 66.6428896 | 0.22702484 | -2.13907794 | -6.10348587 | 1.04E-09 | 4.50E-09 | Down |
| circRNA_0555 Chr1:184008119_184055555_+ | 17.1653372 | 66.5607885 | 0.22730487 | -2.13729951 | -6.09653224 | 1.08E-09 | 4.69E-09 | Down |
| circRNA_3795 Chr17:63847963_63879166_-  | 120.528178 | 37.1317305 | 2.86100266 | 1.51652084  | 6.08574172  | 1.16E-09 | 5.01E-09 | Up   |
| circRNA_5262 Chr2:251887045_251889238_+ | 35.5053096 | 96.1796434 | 0.32537561 | -1.61982197 | -6.0752804  | 1.24E-09 | 5.33E-09 | Down |
| circRNA_5432 Chr20:32513668_32523997_+  | 111.171647 | 198.067045 | 0.49471682 | -1.01532515 | -6.06848641 | 1.29E-09 | 5.54E-09 | Down |
| circRNA_7264 Chr5:169145996_169147320_+ | 29.1538271 | 86.2362124 | 0.29797564 | -1.74673371 | -6.06842809 | 1.29E-09 | 5.54E-09 | Down |
| circRNA_1563 Chr10:73854212_73857079_-  | 17.1080085 | 66.0356187 | 0.2283474  | -2.13069775 | -6.06060564 | 1.36E-09 | 5.80E-09 | Down |
| circRNA_1507 Chr10:70579708_70584317_+  | 82.8942303 | 18.6642023 | 3.91462107 | 1.96887266  | 6.05831717  | 1.38E-09 | 5.87E-09 | Up   |
| circRNA_7342 Chr6:7623900_7698590_-     | 34.216017  | 93.8446873 | 0.32136207 | -1.63772842 | -6.04861899 | 1.46E-09 | 6.23E-09 | Down |
| circRNA_8066 Chr7:70688610_70697117_+   | 61.6886442 | 133.213037 | 0.40816274 | -1.29278361 | -6.03914514 | 1.55E-09 | 6.59E-09 | Down |
| circRNA_8800 Chr8:117106575_117109692_+ | 54.6764391 | 123.451376 | 0.39037244 | -1.3570769  | -6.03515415 | 1.59E-09 | 6.75E-09 | Down |
| circRNA_8255 Chr7:126282121_126283984_+ | 82.4138215 | 18.6642023 | 3.8919341  | 1.96048728  | 6.02375528  | 1.70E-09 | 7.22E-09 | Up   |
| circRNA_3744 Chr17:47419445_47421071_+  | 81.8818025 | 18.4756461 | 3.90627323 | 1.96579286  | 6.01499629  | 1.80E-09 | 7.61E-09 | Up   |
| circRNA_0303 Chr1:116593695_116610544_+ | 36.6012219 | 96.9431598 | 0.33277698 | -1.58737247 | -6.01086805 | 1.85E-09 | 7.80E-09 | Down |
| circRNA_5525 Chr3:8548854_8553003_+     | 82.1777306 | 18.6560843 | 3.88247355 | 1.9569761   | 6.00800225  | 1.88E-09 | 7.92E-09 | Up   |
| circRNA_1331 Chr10:48022762_48039001_-  | 54.418707  | 122.601068 | 0.391227   | -1.35392215 | -6.00363224 | 1.93E-09 | 8.13E-09 | Down |
| circRNA_2048 Chr11:87529218_87535394_+  | 82.0917376 | 18.6560843 | 3.87841082 | 1.95546563  | 6.00179386  | 1.95E-09 | 8.21E-09 | Up   |

|                                         |            |            |            |             |             |          |          |      |
|-----------------------------------------|------------|------------|------------|-------------|-------------|----------|----------|------|
| circRNA_0583 Chr1:186077651_186114868_+ | 18.3973011 | 67.4064059 | 0.24056243 | -2.05551675 | -5.98459722 | 2.17E-09 | 9.10E-09 | Down |
| circRNA_4778 Chr2:94716330_94720889_-   | 79.7079451 | 156.128751 | 0.44998039 | -1.15206597 | -5.9702081  | 2.37E-09 | 9.91E-09 | Down |
| circRNA_4641 Chr2:38074255_38110573_-   | 56.7497787 | 125.158847 | 0.39964785 | -1.32319878 | -5.95993926 | 2.52E-09 | 1.05E-08 | Down |
| circRNA_8434 Chr8:46728894_46730691_-   | 27.5959516 | 82.3042188 | 0.29552766 | -1.75863493 | -5.95655615 | 2.58E-09 | 1.07E-08 | Down |
| circRNA_9388 ChrX:13905156_13930670_+   | 66.5038871 | 138.227754 | 0.42405935 | -1.23766192 | -5.94600579 | 2.75E-09 | 1.14E-08 | Down |
| circRNA_4957 Chr2:178247960_178249289_- | 17.1653372 | 64.7671469 | 0.23359978 | -2.09788918 | -5.94338705 | 2.79E-09 | 1.16E-08 | Down |
| circRNA_9483 ChrX:63552834_63602914_+   | 17.1653372 | 64.7671469 | 0.23359978 | -2.09788918 | -5.94338705 | 2.79E-09 | 1.16E-08 | Down |
| circRNA_3955 Chr17:90409044_90424571_-  | 17.1080085 | 64.6123034 | 0.23337756 | -2.09926226 | -5.93874999 | 2.87E-09 | 1.19E-08 | Down |
| circRNA_1902 Chr11:47165426_47169764_+  | 152.073725 | 55.9581789 | 2.39533064 | 1.26022482  | 5.93867337  | 2.87E-09 | 1.19E-08 | Up   |
| circRNA_4855 Chr2:127770379_127780222_- | 37.315924  | 96.9175651 | 0.33936462 | -1.55909193 | -5.93200047 | 2.99E-09 | 1.23E-08 | Down |
| circRNA_8078 Chr7:71326796_71331115_+   | 182.702457 | 74.0830227 | 2.17370474 | 1.12015599  | 5.92804196  | 3.07E-09 | 1.26E-08 | Up   |
| circRNA_0649 Chr1:200648164_200658087_- | 100.202642 | 27.9841265 | 3.15603838 | 1.65811475  | 5.91992355  | 3.22E-09 | 1.32E-08 | Up   |
| circRNA_2819 Chr14:37552177_37584371_+  | 53.9026107 | 120.544888 | 0.3941267  | -1.34326859 | -5.91714287 | 3.28E-09 | 1.34E-08 | Down |
| circRNA_1916 Chr11:60383243_60388137_+  | 102.686335 | 184.536422 | 0.49046206 | -1.02778656 | -5.91661159 | 3.29E-09 | 1.34E-08 | Down |
| circRNA_3808 Chr17:65826669_65857795_-  | 118.074948 | 37.3121687 | 2.78921587 | 1.4798596   | 5.91533243  | 3.31E-09 | 1.35E-08 | Up   |
| circRNA_4930 Chr2:157066595_157105004_- | 189.635553 | 78.441919  | 2.13081827 | 1.09140755  | 5.91387466  | 3.34E-09 | 1.36E-08 | Up   |
| circRNA_3076 Chr15:10416533_10434205_-  | 25.7480057 | 78.6990741 | 0.28836917 | -1.79401114 | -5.90548498 | 3.52E-09 | 1.42E-08 | Down |
| circRNA_3499 Chr16:60310912_60317529_+  | 80.0520555 | 18.4756461 | 3.81898287 | 1.93318845  | 5.8819047   | 4.06E-09 | 1.63E-08 | Up   |
| circRNA_3755 Chr17:51972801_51981081_+  | 78.4186525 | 152.712162 | 0.45260631 | -1.14367138 | -5.87002648 | 4.36E-09 | 1.75E-08 | Down |
| circRNA_6319 Chr4:67399951_67412670_-   | 18.3973011 | 66.0356187 | 0.2455561  | -2.02587545 | -5.86807752 | 4.41E-09 | 1.77E-08 | Down |
| circRNA_7706 Chr6:104862169_104864968_+ | 89.2432043 | 166.47887  | 0.47248812 | -1.08165004 | -5.85920225 | 4.65E-09 | 1.86E-08 | Down |
| circRNA_4515 Chr2:5570780_5576549_-     | 171.774331 | 68.3625374 | 2.21470022 | 1.14711143  | 5.85888603  | 4.66E-09 | 1.86E-08 | Up   |
| circRNA_8527 Chr8:63730622_63756315_-   | 17.1653372 | 63.6548506 | 0.23768167 | -2.07289744 | -5.84720621 | 5.00E-09 | 1.99E-08 | Down |
| circRNA_0624 Chr1:197981834_197983858_- | 55.979778  | 122.250266 | 0.4036047  | -1.30898512 | -5.84137305 | 5.18E-09 | 2.05E-08 | Down |
| circRNA_2466 Chr13:53175100_53186162_-  | 19.4358847 | 67.4986473 | 0.25379561 | -1.97826099 | -5.84128945 | 5.18E-09 | 2.05E-08 | Down |
| circRNA_0675 Chr1:204761727_204780713_- | 116.86782  | 37.3121687 | 2.7607006  | 1.46503444  | 5.84104701  | 5.19E-09 | 2.05E-08 | Up   |
| circRNA_8566 Chr8:67801800_67809889_-   | 84.3283954 | 159.81428  | 0.46508584 | -1.10443109 | -5.83852201 | 5.27E-09 | 2.08E-08 | Down |
| circRNA_2480 Chr13:56991070_56993049_-  | 165.594448 | 64.9354188 | 2.24770331 | 1.16845162  | 5.83790398  | 5.29E-09 | 2.08E-08 | Up   |
| circRNA_9595 ChrX:143419760_143443355_- | 79.7879528 | 18.6560843 | 3.76956889 | 1.91439954  | 5.83408593  | 5.41E-09 | 2.12E-08 | Up   |
| circRNA_1144 Chr10:4183171_4191496_-    | 79.3999075 | 18.4756461 | 3.78787134 | 1.92138733  | 5.83405553  | 5.41E-09 | 2.12E-08 | Up   |
| circRNA_5455 Chr20:44890495_44931228_+  | 76.4845203 | 17.2852971 | 3.90006242 | 1.96349721  | 5.80889079  | 6.29E-09 | 2.46E-08 | Up   |
| circRNA_2721 Chr14:6612028_6622491_-    | 135.562369 | 47.8965862 | 2.49464899 | 1.31883683  | 5.80846713  | 6.30E-09 | 2.46E-08 | Up   |



|                                          |            |            |            |             |             |          |          |      |
|------------------------------------------|------------|------------|------------|-------------|-------------|----------|----------|------|
| circRNA_8686 Chr8:85278854_85285823_+    | 42.8273499 | 103.245472 | 0.36561588 | -1.45159937 | -5.80766331 | 6.34E-09 | 2.47E-08 | Down |
| circRNA_0757 Chr1:220032746_220034697_-  | 154.874508 | 59.0223183 | 2.31280243 | 1.20964203  | 5.80321411  | 6.51E-09 | 2.53E-08 | Up   |
| circRNA_4509 Chr2:4961753_5031767_+      | 28.6707013 | 81.8894825 | 0.30859227 | -1.69622616 | -5.79299577 | 6.91E-09 | 2.69E-08 | Down |
| circRNA_5406 Chr20:27538479_27544812_-   | 45.0978975 | 106.271202 | 0.37403786 | -1.4187438  | -5.79167419 | 6.97E-09 | 2.71E-08 | Down |
| circRNA_9196 Chr9:81204850_81208345_-    | 74.2517246 | 145.631194 | 0.44939371 | -1.15394815 | -5.77352373 | 7.76E-09 | 3.01E-08 | Down |
| circRNA_3226 Chr15:56804970_56808138_-   | 18.3973011 | 64.7671469 | 0.25036534 | -1.99789324 | -5.75903127 | 8.46E-09 | 3.27E-08 | Down |
| circRNA_4336 Chr19:25861153_25886887_-   | 61.8692973 | 128.847494 | 0.42322768 | -1.24049411 | -5.75100641 | 8.87E-09 | 3.42E-08 | Down |
| circRNA_8435 Chr8:47303909_47306590_-    | 25.6620128 | 76.1527718 | 0.29701601 | -1.7513874  | -5.713185   | 1.11E-08 | 4.25E-08 | Down |
| circRNA_3862 Chr17:79367996_79383074_-   | 84.6504792 | 157.848318 | 0.47267684 | -1.08107392 | -5.70281885 | 1.18E-08 | 4.50E-08 | Down |
| circRNA_5492 Chr3:2021173_2025998_-      | 96.8959613 | 27.9963034 | 3.0505619  | 1.60907501  | 5.69746259  | 1.22E-08 | 4.63E-08 | Up   |
| circRNA_1718 Chr10:96264760_96266403_-   | 167.447121 | 67.7537802 | 2.17830662 | 1.12320704  | 5.68758066  | 1.29E-08 | 4.88E-08 | Up   |
| circRNA_2600 Chr13:95098506_95128782_-   | 92.9040408 | 167.87861  | 0.48776889 | -1.03573035 | -5.67901441 | 1.35E-08 | 5.11E-08 | Down |
| circRNA_5176 Chr2:227293654_227302440_-  | 111.695033 | 35.9413814 | 2.73913826 | 1.45372209  | 5.67733468  | 1.37E-08 | 5.15E-08 | Up   |
| circRNA_4443 Chr19:43118177_43119064_-   | 137.174224 | 50.2133502 | 2.40784303 | 1.26774134  | 5.66648345  | 1.46E-08 | 5.46E-08 | Up   |
| circRNA_8377 Chr8:23851919_23884848_+    | 163.747668 | 65.7911764 | 2.19372573 | 1.13338317  | 5.66535112  | 1.47E-08 | 5.49E-08 | Up   |
| circRNA_3927 Chr17:84872804_84904355_+   | 100.223805 | 30.0302332 | 2.94162318 | 1.55661245  | 5.6567512   | 1.54E-08 | 5.76E-08 | Up   |
| circRNA_0163 Chr1:57709952_57712920_+    | 18.9186229 | 64.4237472 | 0.25883226 | -1.94991068 | -5.6526047  | 1.58E-08 | 5.88E-08 | Down |
| circRNA_3451 Chr16:46839592_46850408_+   | 18.9186229 | 64.4237472 | 0.25883226 | -1.94991068 | -5.6526047  | 1.58E-08 | 5.88E-08 | Down |
| circRNA_3013 Chr14:110683107_110691731_+ | 74.1123238 | 17.2852971 | 3.7791005  | 1.91804288  | 5.62989556  | 1.80E-08 | 6.68E-08 | Up   |
| circRNA_6539 Chr4:152937981_152938845_+  | 44.7612888 | 103.443387 | 0.38139475 | -1.39064311 | -5.62825733 | 1.82E-08 | 6.74E-08 | Down |
| circRNA_5232 Chr2:247642373_247661088_-  | 38.0324237 | 93.7490879 | 0.35757061 | -1.48369995 | -5.6251167  | 1.85E-08 | 6.85E-08 | Down |
| circRNA_4731 Chr2:61301866_61319541_+    | 37.8372457 | 93.4265929 | 0.35696354 | -1.48615136 | -5.62232165 | 1.88E-08 | 6.94E-08 | Down |
| circRNA_9408 ChrX:21542111_21552121_+    | 76.9041932 | 18.6560843 | 3.63332613 | 1.86129087  | 5.62027435  | 1.91E-08 | 7.01E-08 | Up   |
| circRNA_0580 Chr1:186006551_186009525_+  | 112.9247   | 37.1398484 | 2.6799314  | 1.42219607  | 5.61530031  | 1.96E-08 | 7.20E-08 | Up   |
| circRNA_5803 Chr3:94710549_94724521_-    | 91.612472  | 25.9279456 | 3.11430651 | 1.63891094  | 5.61356732  | 1.98E-08 | 7.26E-08 | Up   |
| circRNA_5062 Chr2:198827042_198827471_+  | 112.726361 | 37.1317305 | 2.67580929 | 1.4199753   | 5.60376208  | 2.10E-08 | 7.66E-08 | Up   |
| circRNA_2886 Chr14:60581951_60586776_-   | 166.211329 | 68.0244375 | 2.15362717 | 1.10676851  | 5.59954965  | 2.15E-08 | 7.84E-08 | Up   |
| circRNA_2765 Chr14:17407714_17408515_-   | 46.3191642 | 105.164286 | 0.38821052 | -1.3650889  | -5.59532702 | 2.20E-08 | 8.01E-08 | Down |
| circRNA_0423 Chr1:152902904_152910824_-  | 73.3384954 | 141.094907 | 0.45813716 | -1.12614851 | -5.57276141 | 2.51E-08 | 9.09E-08 | Down |
| circRNA_6215 Chr4:42969247_42979647_-    | 90.9626003 | 25.9279456 | 3.09221454 | 1.62864042  | 5.56846917  | 2.57E-08 | 9.29E-08 | Up   |
| circRNA_3173 Chr15:45437783_45445017_+   | 54.9411943 | 116.285339 | 0.41643574 | -1.26383421 | -5.54377094 | 2.96E-08 | 1.06E-07 | Down |
| circRNA_3389 Chr16:10920598_10925471_-   | 188.016481 | 82.1305667 | 2.01774351 | 1.0127428   | 5.53914833  | 3.04E-08 | 1.09E-07 | Up   |

|                                         |            |            |            |             |             |          |          |      |
|-----------------------------------------|------------|------------|------------|-------------|-------------|----------|----------|------|
| circRNA_5405 Chr20:27535432_27544812_-  | 146.387399 | 56.9714477 | 2.26475536 | 1.17935522  | 5.52963737  | 3.21E-08 | 1.15E-07 | Up   |
| circRNA_1307 Chr10:43227922_43231708_+  | 72.7300152 | 17.2852971 | 3.70861447 | 1.8908803   | 5.52410346  | 3.31E-08 | 1.18E-07 | Up   |
| circRNA_5067 Chr2:199909254_199920591_- | 127.121609 | 45.9481011 | 2.43852197 | 1.28600697  | 5.51599336  | 3.47E-08 | 1.23E-07 | Up   |
| circRNA_5113 Chr2:210725271_210808107_- | 94.2014876 | 27.9841265 | 2.96702267 | 1.56901595  | 5.51598637  | 3.47E-08 | 1.23E-07 | Up   |
| circRNA_7785 Chr6:125538240_125553497_- | 144.607479 | 56.1244984 | 2.27097912 | 1.18331444  | 5.51058231  | 3.58E-08 | 1.26E-07 | Up   |
| circRNA_3564 Chr16:79729199_79747761_-  | 157.081603 | 63.6548506 | 2.17504717 | 1.12104669  | 5.50017484  | 3.79E-08 | 1.33E-07 | Up   |
| circRNA_4951 Chr2:177947848_177973555_- | 97.8386001 | 30.0302332 | 2.87161612 | 1.5218629   | 5.4972667   | 3.86E-08 | 1.36E-07 | Up   |
| circRNA_8790 Chr8:114879150_114881851_+ | 75.1852758 | 18.6642023 | 3.55057117 | 1.82805113  | 5.48939457  | 4.03E-08 | 1.42E-07 | Up   |
| circRNA_0611 Chr1:193255702_193268499_- | 75.0935788 | 18.6560843 | 3.54778395 | 1.82691816  | 5.48372242  | 4.16E-08 | 1.46E-07 | Up   |
| circRNA_1080 Chr1:278656261_278731755_+ | 54.9411943 | 115.238988 | 0.4202169  | -1.2507939  | -5.47418496 | 4.40E-08 | 1.54E-07 | Down |
| circRNA_2432 Chr13:44907813_44937796_+  | 162.357591 | 67.1619637 | 2.13070866 | 1.09133334  | 5.47168302  | 4.46E-08 | 1.56E-07 | Up   |
| circRNA_5714 Chr3:60610877_60624155_-   | 127.155745 | 46.4719496 | 2.41168151 | 1.2700394   | 5.46333311  | 4.67E-08 | 1.63E-07 | Up   |
| circRNA_8543 Chr8:64724416_64749357_+   | 180.859084 | 78.6990741 | 2.0255621  | 1.01832231  | 5.45733181  | 4.83E-08 | 1.68E-07 | Up   |
| circRNA_4982 Chr2:185599195_185617434_+ | 88.6633884 | 158.539092 | 0.49292724 | -1.02055339 | -5.45221987 | 4.97E-08 | 1.73E-07 | Down |
| circRNA_3966 Chr18:1337228_1354828_-    | 90.5399986 | 160.866011 | 0.49607924 | -1.01135752 | -5.45128392 | 5.00E-08 | 1.73E-07 | Down |
| circRNA_1654 Chr10:89402919_89409533_-  | 74.576317  | 18.6560843 | 3.523346   | 1.81694616  | 5.44437378  | 5.20E-08 | 1.80E-07 | Up   |
| circRNA_1104 Chr10:590904_593608_-      | 44.7039602 | 100.708539 | 0.39125019 | -1.35383665 | -5.44096671 | 5.30E-08 | 1.83E-07 | Down |
| circRNA_5286 Chr2:258977695_258991212_+ | 133.331183 | 50.294831  | 2.33659389 | 1.22440701  | 5.43624964  | 5.44E-08 | 1.87E-07 | Up   |
| circRNA_2371 Chr12:51494918_51495425_-  | 73.9171458 | 18.4756461 | 3.52630938 | 1.81815905  | 5.42273681  | 5.87E-08 | 2.01E-07 | Up   |
| circRNA_8524 Chr8:63689729_63707726_-   | 92.7732146 | 27.9963034 | 2.92076605 | 1.5463468   | 5.4161551   | 6.09E-08 | 2.09E-07 | Up   |
| circRNA_5591 Chr3:21721366_21756744_+   | 73.7344627 | 18.4756461 | 3.51759425 | 1.81458908  | 5.40874205  | 6.35E-08 | 2.17E-07 | Up   |
| circRNA_5023 Chr2:189226433_189230967_- | 129.114907 | 48.1672435 | 2.36265033 | 1.24040613  | 5.40449513  | 6.50E-08 | 2.22E-07 | Up   |
| circRNA_5526 Chr3:8562492_8564186_+     | 46.3191642 | 102.417951 | 0.39862037 | -1.32691266 | -5.40298347 | 6.55E-08 | 2.23E-07 | Down |
| circRNA_3934 Chr17:84888802_84922765_+  | 168.021044 | 71.5218864 | 2.07061606 | 1.05006007  | 5.39424166  | 6.88E-08 | 2.33E-07 | Up   |
| circRNA_8635 Chr8:73720946_73729461_+   | 73.4758318 | 18.4756461 | 3.50525594 | 1.80951979  | 5.38889595  | 7.09E-08 | 2.39E-07 | Up   |
| circRNA_2855 Chr14:44447026_44456717_+  | 73.3746614 | 18.4756461 | 3.50042948 | 1.80753194  | 5.38112198  | 7.40E-08 | 2.49E-07 | Up   |
| circRNA_5894 Chr3:122965449_122966421_+ | 91.7357965 | 27.9841265 | 2.88936188 | 1.53075091  | 5.34589567  | 9.00E-08 | 3.01E-07 | Up   |
| circRNA_7481 Chr6:29032002_29074704_+   | 72.6938491 | 136.537759 | 0.46926672 | -1.09151996 | -5.34543191 | 9.02E-08 | 3.02E-07 | Down |
| circRNA_6778 Chr5:36043415_36046665_+   | 45.5432715 | 100.52809  | 0.39931135 | -1.32441403 | -5.34513324 | 9.04E-08 | 3.02E-07 | Down |
| circRNA_3701 Chr17:24036947_24045965_-  | 73.2131409 | 18.6642023 | 3.45743851 | 1.78970359  | 5.33864666  | 9.36E-08 | 3.12E-07 | Up   |
| circRNA_7147 Chr5:149062724_149065190_+ | 28.6707013 | 76.1412958 | 0.33188904 | -1.59122711 | -5.33641133 | 9.48E-08 | 3.15E-07 | Down |
| circRNA_9242 Chr9:92859987_92880445_+   | 47.813819  | 103.262949 | 0.40811614 | -1.29294833 | -5.31756796 | 1.05E-07 | 3.49E-07 | Down |

|                                         |            |            |            |             |             |          |          |      |
|-----------------------------------------|------------|------------|------------|-------------|-------------|----------|----------|------|
| circRNA_6079 Chr3:175422379_175423144_- | 75.5435257 | 20.0201555 | 3.32586535 | 1.73372976  | 5.30454855  | 1.13E-07 | 3.73E-07 | Up   |
| circRNA_0247 Chr1:91671407_91673515_+   | 79.8166171 | 144.877833 | 0.48558609 | -1.04220101 | -5.30261947 | 1.14E-07 | 3.77E-07 | Down |
| circRNA_3736 Chr17:37911319_37913118_+  | 91.1236422 | 27.9963034 | 2.86883279 | 1.52046388  | 5.30166549  | 1.15E-07 | 3.78E-07 | Up   |
| circRNA_5093 Chr2:206563072_206570833_- | 123.420798 | 45.9481011 | 2.36753081 | 1.2433832   | 5.29392051  | 1.20E-07 | 3.94E-07 | Up   |
| circRNA_3339 Chr16:2578902_2581762_-    | 54.8158399 | 112.33781  | 0.43008567 | -1.21730402 | -5.29073687 | 1.22E-07 | 4.01E-07 | Down |
| circRNA_7854 Chr6:136081574_136093254_+ | 28.6707013 | 75.5440991 | 0.33451271 | -1.57986705 | -5.28789354 | 1.24E-07 | 4.06E-07 | Down |
| circRNA_1364 Chr10:48659695_48684279_-  | 107.942558 | 37.3121687 | 2.54986431 | 1.35042048  | 5.27819934  | 1.30E-07 | 4.28E-07 | Up   |
| circRNA_3591 Chr17:718534_728329_+      | 29.1538271 | 76.1412958 | 0.33748165 | -1.56711902 | -5.27756397 | 1.31E-07 | 4.29E-07 | Down |
| circRNA_7510 Chr6:43306391_43309313_+   | 17.1653372 | 57.151886  | 0.26472602 | -1.91742809 | -5.26488737 | 1.40E-07 | 4.58E-07 | Down |
| circRNA_4868 Chr2:128599095_128636580_- | 72.1638601 | 18.6560843 | 3.40936986 | 1.76950512  | 5.25880757  | 1.45E-07 | 4.73E-07 | Up   |
| circRNA_5927 Chr3:133012095_133050098_- | 89.9597041 | 27.7134692 | 2.86109305 | 1.51656642  | 5.25774254  | 1.46E-07 | 4.75E-07 | Up   |
| circRNA_6056 Chr3:163592872_163594186_+ | 121.606123 | 45.2694236 | 2.36769271 | 1.24348186  | 5.25518204  | 1.48E-07 | 4.81E-07 | Up   |
| circRNA_6093 Chr4:632256_642336_+       | 55.4625161 | 112.146681 | 0.43590114 | -1.19792713 | -5.21958632 | 1.79E-07 | 5.79E-07 | Down |
| circRNA_1510 Chr10:71297308_71306105_+  | 136.051164 | 54.2365893 | 2.21097967 | 1.14468576  | 5.20529788  | 1.94E-07 | 6.24E-07 | Up   |
| circRNA_0498 Chr1:169534353_169534828_- | 36.6012219 | 86.0066042 | 0.37509273 | -1.41468081 | -5.19899918 | 2.00E-07 | 6.44E-07 | Down |
| circRNA_4626 Chr2:34396320_34434762_+   | 101.758488 | 34.5705942 | 2.59441029 | 1.37540665  | 5.19703451  | 2.02E-07 | 6.51E-07 | Up   |
| circRNA_1165 Chr10:6858307_6858582_-    | 74.0590551 | 20.0201555 | 3.26051032 | 1.70509779  | 5.19112473  | 2.09E-07 | 6.69E-07 | Up   |
| circRNA_8360 Chr8:22509215_22513080_+   | 73.79024   | 20.0201555 | 3.24867551 | 1.69985165  | 5.17045032  | 2.34E-07 | 7.45E-07 | Up   |
| circRNA_1036 Chr1:266020777_266021582_+ | 28.3779343 | 73.246834  | 0.34148118 | -1.550122   | -5.13523755 | 2.82E-07 | 8.94E-07 | Down |
| circRNA_1801 Chr11:15457479_15474826_+  | 139.585782 | 57.1344092 | 2.15336822 | 1.10659504  | 5.13079673  | 2.89E-07 | 9.14E-07 | Up   |
| circRNA_9281 Chr9:100065134_100067342_- | 34.216017  | 81.7090443 | 0.36909162 | -1.43794913 | -5.13005691 | 2.90E-07 | 9.17E-07 | Down |
| circRNA_0357 Chr1:137247124_137296230_+ | 73.2131409 | 20.0201555 | 3.22326826 | 1.68852426  | 5.12592387  | 2.96E-07 | 9.36E-07 | Up   |
| circRNA_8405 Chr8:33279134_33335423_+   | 70.3573057 | 18.6560843 | 3.32401949 | 1.73292884  | 5.11756598  | 3.10E-07 | 9.76E-07 | Up   |
| circRNA_6211 Chr4:38838812_38873762_-   | 92.1210666 | 30.0302332 | 2.70380341 | 1.43499026  | 5.10601488  | 3.29E-07 | 1.04E-06 | Up   |
| circRNA_3192 Chr15:51915280_51944899_-  | 110.259737 | 40.2032725 | 2.41729918 | 1.27339604  | 5.09788116  | 3.43E-07 | 1.08E-06 | Up   |
| circRNA_0632 Chr1:198965547_198972343_+ | 88.2046207 | 27.9841265 | 2.778142   | 1.47412034  | 5.09784718  | 3.44E-07 | 1.08E-06 | Up   |
| circRNA_3466 Chr16:49634130_49663240_-  | 102.686335 | 35.9413814 | 2.51821465 | 1.33240126  | 5.09527112  | 3.48E-07 | 1.09E-06 | Up   |
| circRNA_5852 Chr3:112825170_112832390_- | 84.2942593 | 25.9279456 | 2.86552862 | 1.5188013   | 5.09500926  | 3.49E-07 | 1.09E-06 | Up   |
| circRNA_9351 Chr9:119615345_119617261_- | 107.037251 | 38.4958016 | 2.45073547 | 1.29321477  | 5.08351206  | 3.71E-07 | 1.16E-06 | Up   |
| circRNA_4968 Chr2:183520240_183535861_- | 19.4358847 | 58.8593568 | 0.29104736 | -1.78067418 | -5.0808832  | 3.76E-07 | 1.17E-06 | Down |
| circRNA_6189 Chr4:28488037_28520904_+   | 157.791732 | 68.9509153 | 2.01706116 | 1.01225483  | 5.07236403  | 3.93E-07 | 1.22E-06 | Up   |
| circRNA_4226 Chr18:72593000_72611211_+  | 138.818004 | 57.4952857 | 2.12808229 | 1.08955394  | 5.05277094  | 4.35E-07 | 1.35E-06 | Up   |

|                                         |            |            |            |             |             |          |          |      |
|-----------------------------------------|------------|------------|------------|-------------|-------------|----------|----------|------|
| circRNA_4218 Chr18:71790177_71796719_-  | 36.5438932 | 83.9403636 | 0.38372388 | -1.38185955 | -5.0456208  | 4.52E-07 | 1.40E-06 | Down |
| circRNA_3937 Chr17:85009878_85057912_-  | 146.977878 | 62.5668976 | 2.07053325 | 1.05000237  | 5.04489535  | 4.54E-07 | 1.40E-06 | Up   |
| circRNA_4279 Chr19:11455327_11456247_+  | 91.0949779 | 30.0302332 | 2.67368714 | 1.41883066  | 5.03439743  | 4.79E-07 | 1.48E-06 | Up   |
| circRNA_1831 Chr11:31974630_31979720_+  | 29.1538271 | 73.0731119 | 0.35165179 | -1.50778054 | -5.02578371 | 5.01E-07 | 1.54E-06 | Down |
| circRNA_4565 Chr2:24125860_24161334_+   | 90.9284642 | 30.0302332 | 2.66879988 | 1.41619113  | 5.02273362  | 5.09E-07 | 1.56E-06 | Up   |
| circRNA_0746 Chr1:218836671_218844420_- | 72.0492028 | 20.183117  | 3.14641353 | 1.6537083   | 5.01030256  | 5.43E-07 | 1.66E-06 | Up   |
| circRNA_9590 ChrX:137709443_137733342_- | 101.027942 | 35.7609432 | 2.49004616 | 1.31617249  | 5.00645941  | 5.54E-07 | 1.69E-06 | Up   |
| circRNA_4767 Chr2:93460344_93495152_-   | 109.073505 | 40.366234  | 2.38163879 | 1.25195462  | 5.00356492  | 5.63E-07 | 1.72E-06 | Up   |
| circRNA_4391 Chr19:34270069_34298610_+  | 108.326543 | 40.040311  | 2.38458222 | 1.25373653  | 4.99195696  | 5.98E-07 | 1.82E-06 | Up   |
| circRNA_1686 Chr10:93464374_93483645_+  | 90.4453384 | 30.0302332 | 2.65461987 | 1.40850529  | 4.9888255   | 6.07E-07 | 1.85E-06 | Up   |
| circRNA_8459 Chr8:50468661_50469347_+   | 18.3973011 | 56.1244984 | 0.28891927 | -1.79126169 | -4.98178668 | 6.30E-07 | 1.91E-06 | Down |
| circRNA_5830 Chr3:111513948_111523935_+ | 103.04778  | 37.3054526 | 2.43467607 | 1.28372984  | 4.95943316  | 7.07E-07 | 2.13E-06 | Up   |
| circRNA_0780 Chr1:221347566_221349792_- | 102.330115 | 36.9512922 | 2.44089271 | 1.28740888  | 4.95313695  | 7.30E-07 | 2.20E-06 | Up   |
| circRNA_1972 Chr11:70130510_70156430_-  | 86.1008137 | 27.9841265 | 2.71187932 | 1.43929298  | 4.94745594  | 7.52E-07 | 2.26E-06 | Up   |
| circRNA_0543 Chr1:177521072_177569872_+ | 136.962876 | 57.5034036 | 2.09934674 | 1.06994047  | 4.94532641  | 7.60E-07 | 2.28E-06 | Up   |
| circRNA_2821 Chr14:37579854_37584371_+  | 75.6663716 | 133.615747 | 0.49913741 | -1.00249105 | -4.93212806 | 8.13E-07 | 2.43E-06 | Down |
| circRNA_7420 Chr6:21942755_21944809_-   | 81.9784926 | 25.9279456 | 2.78680563 | 1.47861238  | 4.92576516  | 8.40E-07 | 2.51E-06 | Up   |
| circRNA_5453 Chr20:44854295_44866267_+  | 100.154228 | 35.9494994 | 2.45556423 | 1.29605456  | 4.9257126   | 8.41E-07 | 2.51E-06 | Up   |
| circRNA_6660 Chr4:183491269_183537970_- | 36.279138  | 81.8720058 | 0.39056776 | -1.35635524 | -4.91276117 | 8.98E-07 | 2.67E-06 | Down |
| circRNA_5597 Chr3:21834215_21904269_-   | 120.217177 | 47.7336247 | 2.21981597 | 1.15044008  | 4.91270032  | 8.98E-07 | 2.67E-06 | Up   |
| circRNA_3322 Chr16:2117271_2126628_-    | 65.4329651 | 120.464743 | 0.47875299 | -1.06264659 | -4.91263211 | 8.99E-07 | 2.67E-06 | Down |
| circRNA_3968 Chr18:1655301_1680976_+    | 133.291821 | 55.6073766 | 2.1127395  | 1.0791149   | 4.91261076  | 8.99E-07 | 2.67E-06 | Up   |
| circRNA_6860 Chr5:75990187_76002878_-   | 25.6620128 | 66.5526705 | 0.33986003 | -1.5569874  | -4.91078035 | 9.07E-07 | 2.69E-06 | Down |
| circRNA_5381 Chr20:19767793_19780300_-  | 51.4386828 | 102.347326 | 0.44298416 | -1.17467299 | -4.90926455 | 9.14E-07 | 2.71E-06 | Down |
| circRNA_5767 Chr3:80670138_80732927_+   | 102.168174 | 37.3054526 | 2.4138939  | 1.27136227  | 4.90113785  | 9.53E-07 | 2.81E-06 | Up   |
| circRNA_3792 Chr17:63700912_63716786_+  | 44.7758136 | 93.2669895 | 0.42314614 | -1.24077208 | -4.89374221 | 9.89E-07 | 2.92E-06 | Down |
| circRNA_1660 Chr10:90749189_90749801_-  | 130.6064   | 54.2365893 | 2.12249633 | 1.08576206  | 4.88718925  | 1.02E-06 | 3.01E-06 | Up   |
| circRNA_7479 Chr6:28727428_28733354_-   | 25.6620128 | 66.0356187 | 0.3425211  | -1.54573525 | -4.86579355 | 1.14E-06 | 3.34E-06 | Down |
| circRNA_4250 Chr18:79525398_79532387_-  | 69.8359839 | 20.0201555 | 3.07458616 | 1.62039224  | 4.86135536  | 1.17E-06 | 3.41E-06 | Up   |
| circRNA_1492 Chr10:67705142_67711884_+  | 25.6620128 | 65.9797326 | 0.34281122 | -1.54451378 | -4.86091946 | 1.17E-06 | 3.41E-06 | Down |
| circRNA_6883 Chr5:86427115_86450640_-   | 69.8073196 | 20.0201555 | 3.07332419 | 1.61979996  | 4.85907971  | 1.18E-06 | 3.44E-06 | Up   |
| circRNA_3979 Chr18:2005294_2038143_+    | 19.1138009 | 55.9440602 | 0.30113964 | -1.73149545 | -4.8578732  | 1.19E-06 | 3.46E-06 | Down |

|                                          |            |            |            |             |             |          |          |      |
|------------------------------------------|------------|------------|------------|-------------|-------------|----------|----------|------|
| circRNA_1825 Chr11:31727378_31733245_-   | 135.11493  | 57.3148474 | 2.07783501 | 1.0550811   | 4.85612158  | 1.20E-06 | 3.48E-06 | Up   |
| circRNA_2688 Chr13:113832448_113844645_- | 47.5893242 | 96.4988503 | 0.43467259 | -1.20199897 | -4.8547725  | 1.21E-06 | 3.50E-06 | Down |
| circRNA_0030 Chr1:6810305_6829781_-      | 66.664929  | 18.4756461 | 3.18033335 | 1.66917799  | 4.85151049  | 1.23E-06 | 3.56E-06 | Up   |
| circRNA_8944 Chr9:16047755_16051380_+    | 136.185852 | 58.0265367 | 2.06861753 | 1.04866693  | 4.85108078  | 1.23E-06 | 3.56E-06 | Up   |
| circRNA_2214 Chr12:24505864_24511621_-   | 64.2116984 | 17.2852971 | 3.2742525  | 1.71116558  | 4.84578874  | 1.26E-06 | 3.65E-06 | Up   |
| circRNA_8311 Chr7:141824553_141832801_+  | 38.8717694 | 84.4439027 | 0.4057335  | -1.30139565 | -4.83297658 | 1.35E-06 | 3.88E-06 | Down |
| circRNA_8178 Chr7:114445792_114457012_-  | 83.8302662 | 27.7134692 | 2.66615141 | 1.41475871  | 4.81901306  | 1.44E-06 | 4.15E-06 | Up   |
| circRNA_2422 Chr13:41696246_41699674_-   | 63.8750896 | 17.2852971 | 3.2570883  | 1.70358283  | 4.81798029  | 1.45E-06 | 4.17E-06 | Up   |
| circRNA_0921 Chr1:251461620_251485480_+  | 84.3283954 | 27.9963034 | 2.65489899 | 1.40865697  | 4.81755581  | 1.45E-06 | 4.17E-06 | Up   |
| circRNA_3036 Chr14:115183821_115184780_+ | 19.4358847 | 55.9440602 | 0.3062141  | -1.70738736 | -4.81028994 | 1.51E-06 | 4.31E-06 | Down |
| circRNA_0652 Chr1:200671013_200672411_-  | 66.1456372 | 18.4756461 | 3.15555989 | 1.65789601  | 4.80930729  | 1.51E-06 | 4.33E-06 | Up   |
| circRNA_7619 Chr6:78285568_78353348_+    | 25.7480057 | 65.4525406 | 0.34673042 | -1.52811367 | -4.80368466 | 1.56E-06 | 4.44E-06 | Down |
| circRNA_9405 ChrX:20952577_20987315_+    | 63.6944365 | 17.2852971 | 3.24787652 | 1.69949679  | 4.80302222  | 1.56E-06 | 4.45E-06 | Up   |
| circRNA_4145 Chr18:49891333_49891588_-   | 103.276335 | 38.8473193 | 2.3432284  | 1.22849758  | 4.79701108  | 1.61E-06 | 4.58E-06 | Up   |
| circRNA_2729 Chr14:9201456_9202798_+     | 38.8717694 | 83.7841182 | 0.40892858 | -1.2900792  | -4.78156447 | 1.74E-06 | 4.93E-06 | Down |
| circRNA_1384 Chr10:55419844_55436069_-   | 118.563777 | 48.1672435 | 2.16957712 | 1.11741387  | 4.76593933  | 1.88E-06 | 5.32E-06 | Up   |
| circRNA_4711 Chr2:56451097_56461055_+    | 83.0170763 | 27.7134692 | 2.64028858 | 1.40069563  | 4.75949744  | 1.94E-06 | 5.49E-06 | Up   |
| circRNA_8464 Chr8:53075010_53143722_-    | 64.0165204 | 116.196135 | 0.48559615 | -1.0421711  | -4.74865573 | 2.05E-06 | 5.78E-06 | Down |
| circRNA_0337 Chr1:129142521_129149837_+  | 27.5959516 | 67.4986473 | 0.36035053 | -1.47252713 | -4.74624505 | 2.07E-06 | 5.84E-06 | Down |
| circRNA_1342 Chr10:48165219_48200848_-   | 102.146533 | 38.6762398 | 2.32784599 | 1.21899562  | 4.74160048  | 2.12E-06 | 5.97E-06 | Up   |
| circRNA_4275 Chr19:10788035_10789787_-   | 25.6620128 | 64.6041854 | 0.35011033 | -1.51411848 | -4.74022477 | 2.13E-06 | 6.01E-06 | Down |
| circRNA_0751 Chr1:219353460_219354165_+  | 116.744496 | 47.5599725 | 2.16356365 | 1.11340957  | 4.71555405  | 2.41E-06 | 6.76E-06 | Up   |
| circRNA_6358 Chr4:95892497_95912787_+    | 101.7228   | 38.6762398 | 2.31818943 | 1.21299846  | 4.71337188  | 2.44E-06 | 6.83E-06 | Up   |
| circRNA_9302 Chr9:111690153_111756949_+  | 54.418707  | 103.277067 | 0.46442884 | -1.10647053 | -4.70041553 | 2.60E-06 | 7.26E-06 | Down |
| circRNA_5772 Chr3:80732031_80732927_+    | 82.6306406 | 27.9841265 | 2.60258081 | 1.37994296  | 4.69490838  | 2.67E-06 | 7.44E-06 | Up   |
| circRNA_0579 Chr1:185878823_185902595_+  | 62.2632347 | 17.2852971 | 3.17489736 | 1.66670995  | 4.68367491  | 2.82E-06 | 7.85E-06 | Up   |
| circRNA_2682 Chr13:110837569_110856315_- | 62.2632347 | 17.2852971 | 3.17489736 | 1.66670995  | 4.68367491  | 2.82E-06 | 7.85E-06 | Up   |
| circRNA_9343 Chr9:117583609_117585639_+  | 64.9791562 | 18.6642023 | 3.06859443 | 1.61757798  | 4.68339842  | 2.82E-06 | 7.85E-06 | Up   |
| circRNA_6862 Chr5:75990187_76032992_-    | 64.7546613 | 18.6560843 | 3.05932347 | 1.61321265  | 4.66621228  | 3.07E-06 | 8.52E-06 | Up   |
| circRNA_7575 Chr6:72418120_72430205_-    | 101.256497 | 38.8392013 | 2.29788063 | 1.20030386  | 4.66358948  | 3.11E-06 | 8.63E-06 | Up   |
| circRNA_0884 Chr1:245926333_245937626_-  | 111.526736 | 44.9987663 | 2.184506   | 1.12730707  | 4.65526749  | 3.24E-06 | 8.97E-06 | Up   |
| circRNA_3336 Chr16:2297907_2304875_+     | 113.306177 | 46.1110626 | 2.16582476 | 1.11491652  | 4.65066268  | 3.31E-06 | 9.16E-06 | Up   |

|                                          |            |            |            |             |             |          |          |      |
|------------------------------------------|------------|------------|------------|-------------|-------------|----------|----------|------|
| circRNA_3137 Chr15:36934315_36940208_+   | 57.5317614 | 106.337849 | 0.47686413 | -1.06834982 | -4.63576501 | 3.56E-06 | 9.82E-06 | Down |
| circRNA_0848 Chr1:241126635_241139602_-  | 81.7650808 | 27.9963034 | 2.57419852 | 1.36412332  | 4.62938704  | 3.67E-06 | 1.01E-05 | Up   |
| circRNA_3997 Chr18:4217010_4246828_-     | 126.80565  | 54.5907496 | 2.04736089 | 1.03376543  | 4.62643547  | 3.72E-06 | 1.03E-05 | Up   |
| circRNA_0121 Chr1:37988341_37990001_-    | 64.1760109 | 18.6560843 | 3.03198522 | 1.60026272  | 4.61837878  | 3.87E-06 | 1.06E-05 | Up   |
| circRNA_0246 Chr1:91560398_91562180_-    | 54.6764391 | 102.433486 | 0.47047129 | -1.08782141 | -4.61717664 | 3.89E-06 | 1.07E-05 | Down |
| circRNA_7667 Chr6:99935678_99947953_+    | 122.182744 | 51.8558912 | 2.07676152 | 1.05433556  | 4.61519638  | 3.93E-06 | 1.08E-05 | Up   |
| circRNA_4017 Chr18:14654702_14663398_+   | 128.337018 | 55.7097726 | 2.03046458 | 1.02180986  | 4.61000388  | 4.03E-06 | 1.10E-05 | Up   |
| circRNA_9141 Chr9:69859846_69868399_-    | 25.6620128 | 63.0596761 | 0.35868552 | -1.47920861 | -4.60300205 | 4.16E-06 | 1.14E-05 | Down |
| circRNA_2604 Chr13:95167819_95196402_-   | 63.622583  | 18.4756461 | 3.03519445 | 1.60178895  | 4.60158996  | 4.19E-06 | 1.15E-05 | Up   |
| circRNA_2012 Chr11:79309778_79361614_-   | 84.8115212 | 30.2746755 | 2.46916558 | 1.30402359  | 4.5543074   | 5.26E-06 | 1.43E-05 | Up   |
| circRNA_7528 Chr6:49198513_49249731_-    | 111.301342 | 46.1110626 | 2.12750274 | 1.08916099  | 4.52299532  | 6.10E-06 | 1.65E-05 | Up   |
| circRNA_1388 Chr10:56008810_56009454_-   | 65.6283754 | 20.0201555 | 2.88934276 | 1.53074136  | 4.52159742  | 6.14E-06 | 1.66E-05 | Up   |
| circRNA_2543 Chr13:77000105_77051919_+   | 62.65128   | 18.6560843 | 2.95994956 | 1.56557259  | 4.49118238  | 7.08E-06 | 1.90E-05 | Up   |
| circRNA_8500 Chr8:60441497_60471827_-    | 108.133163 | 44.58403   | 2.13773783 | 1.09608493  | 4.4811139   | 7.43E-06 | 1.99E-05 | Up   |
| circRNA_7003 Chr5:126796181_126803679_+  | 57.6634864 | 104.293694 | 0.48732389 | -1.03704714 | -4.48071317 | 7.44E-06 | 1.99E-05 | Down |
| circRNA_3314 Chr15:110234718_110265737_+ | 91.2243923 | 34.5705942 | 2.32583549 | 1.21774906  | 4.47730529  | 7.56E-06 | 2.02E-05 | Up   |
| circRNA_7825 Chr6:132439038_132439743_+  | 75.7025376 | 25.9279456 | 2.57345862 | 1.36370858  | 4.45341523  | 8.45E-06 | 2.25E-05 | Up   |
| circRNA_5194 Chr2:233693356_233713662_-  | 42.7700213 | 84.7873024 | 0.44461438 | -1.16937348 | -4.45221479 | 8.50E-06 | 2.26E-05 | Down |
| circRNA_4249 Chr18:79516977_79532387_-   | 114.057045 | 48.5058794 | 2.07253843 | 1.05139885  | 4.44892283  | 8.63E-06 | 2.29E-05 | Up   |
| circRNA_8748 Chr8:103954818_103965378_+  | 64.6973327 | 20.0201555 | 2.84835285 | 1.51012788  | 4.44480207  | 8.80E-06 | 2.33E-05 | Up   |
| circRNA_7029 Chr5:128959422_128973060_+  | 29.1538271 | 66.2160569 | 0.38806736 | -1.365621   | -4.44116401 | 8.95E-06 | 2.36E-05 | Down |
| circRNA_7982 Chr7:41167312_41167751_+    | 92.9117165 | 35.9413814 | 2.2785081  | 1.1880895   | 4.43118885  | 9.37E-06 | 2.47E-05 | Up   |
| circRNA_5160 Chr2:225359048_225371154_-  | 56.2304869 | 101.735916 | 0.48716088 | -1.03752982 | -4.42711327 | 9.55E-06 | 2.51E-05 | Down |
| circRNA_5330 Chr20:5851258_5853847_-     | 82.5412059 | 30.0302332 | 2.42262928 | 1.27657366  | 4.41932946  | 9.90E-06 | 2.60E-05 | Up   |
| circRNA_3969 Chr18:1664670_1680976_+     | 34.2733457 | 72.9950697 | 0.41384511 | -1.27283717 | -4.41660467 | 1.00E-05 | 2.63E-05 | Down |
| circRNA_7624 Chr6:80149001_80150524_-    | 28.3779343 | 64.7752649 | 0.38614146 | -1.37279861 | -4.41017687 | 1.03E-05 | 2.70E-05 | Down |
| circRNA_8452 Chr8:50223084_50223234_+    | 82.4031243 | 30.0302332 | 2.41857651 | 1.27415818  | 4.40912139  | 1.04E-05 | 2.71E-05 | Up   |
| circRNA_7813 Chr6:129629703_129632684_+  | 99.6489821 | 40.2032725 | 2.18467239 | 1.12741695  | 4.40072334  | 1.08E-05 | 2.80E-05 | Up   |
| circRNA_0450 Chr1:162451867_162454337_+  | 94.4580886 | 37.3121687 | 2.23132854 | 1.15790295  | 4.37723326  | 1.20E-05 | 3.10E-05 | Up   |
| circRNA_8971 Chr9:30099113_30122634_-    | 109.124463 | 46.1891153 | 2.08236729 | 1.05822456  | 4.37472562  | 1.22E-05 | 3.13E-05 | Up   |
| circRNA_4844 Chr2:123576589_123600232_+  | 44.7039602 | 86.2362124 | 0.45691055 | -1.13001635 | -4.36867093 | 1.25E-05 | 3.21E-05 | Down |
| circRNA_8837 Chr8:122024123_122038442_+  | 38.8717694 | 78.2789575 | 0.43768749 | -1.19202694 | -4.34370326 | 1.40E-05 | 3.57E-05 | Down |

|                                          |            |            |            |             |             |          |            |      |
|------------------------------------------|------------|------------|------------|-------------|-------------|----------|------------|------|
| circRNA_8943 Chr9:16045490_16046478_+    | 105.507294 | 44.58403   | 2.08582574 | 1.06061863  | 4.30954822  | 1.64E-05 | 4.15E-05   | Up   |
| circRNA_3385 Chr16:10782168_10789158_-   | 62.944047  | 20.0201555 | 2.77116302 | 1.47049158  | 4.2985127   | 1.72E-05 | 4.36E-05   | Up   |
| circRNA_7499 Chr6:38637079_38641066_+    | 63.1731147 | 20.183117  | 2.7587917  | 1.46403653  | 4.29222257  | 1.77E-05 | 4.48E-05   | Up   |
| circRNA_5254 Chr2:248779402_248781144_-  | 36.08396   | 73.9444046 | 0.43011415 | -1.21720848 | -4.29213487 | 1.77E-05 | 4.48E-05   | Down |
| circRNA_6509 Chr4:150781208_150803194_-  | 102.847377 | 43.2132427 | 2.09773788 | 1.06883442  | 4.28173309  | 1.85E-05 | 4.68E-05   | Up   |
| circRNA_6229 Chr4:49207203_49232570_+    | 93.037071  | 37.3054526 | 2.19815633 | 1.13629399  | 4.27910378  | 1.88E-05 | 4.73E-05   | Up   |
| circRNA_5365 Chr20:13032443_13033377_+   | 92.2550883 | 36.9512922 | 2.20057187 | 1.13787849  | 4.26585208  | 1.99E-05 | 5.01E-05   | Up   |
| circRNA_1187 Chr10:13938652_13944844_+   | 62.291899  | 20.0201555 | 2.74245167 | 1.4554662   | 4.24352713  | 2.20E-05 | 5.50E-05   | Up   |
| circRNA_6013 Chr3:152966158_152973518_-  | 62.291899  | 20.0201555 | 2.74245167 | 1.4554662   | 4.24352713  | 2.20E-05 | 5.50E-05   | Up   |
| circRNA_5425 Chr20:31723610_31736111_-   | 92.4522963 | 37.3121687 | 2.18394687 | 1.12693776  | 4.23737565  | 2.26E-05 | 5.63E-05   | Up   |
| circRNA_5840 Chr3:112288444_112291953_-  | 89.8380237 | 35.7609432 | 2.21424709 | 1.14681622  | 4.23609485  | 2.27E-05 | 5.66E-05   | Up   |
| circRNA_5124 Chr2:211605377_211618826_-  | 35.5053096 | 72.3877182 | 0.43231796 | -1.20983533 | -4.22638565 | 2.37E-05 | 5.89E-05   | Down |
| circRNA_5242 Chr2:247858119_247894081_-  | 36.5438932 | 73.6615703 | 0.43726901 | -1.19340699 | -4.21750963 | 2.47E-05 | 6.11E-05   | Down |
| circRNA_1837 Chr11:33952127_33953096_+   | 38.2276017 | 75.8807127 | 0.44403838 | -1.17124371 | -4.21724039 | 2.47E-05 | 6.11E-05   | Down |
| circRNA_8624 Chr8:72221714_72261300_-    | 55.1404322 | 97.4447571 | 0.49875418 | -1.00359917 | -4.2157561  | 2.49E-05 | 6.14E-05   | Down |
| circRNA_3546 Chr16:71828773_71874158_+   | 109.03847  | 47.7336247 | 2.0134006  | 1.00963425  | 4.20748811  | 2.58E-05 | 6.37E-05   | Up   |
| circRNA_1382 Chr10:55349536_55362785_+   | 92.1658999 | 37.4684141 | 2.16810252 | 1.11643298  | 4.19900649  | 2.68E-05 | 6.61E-05   | Up   |
| circRNA_4872 Chr2:128619074_128668115_-  | 75.8656095 | 27.9841265 | 2.38950561 | 1.25671215  | 4.1853072   | 2.85E-05 | 6.98E-05   | Up   |
| circRNA_8541 Chr8:64635064_64648503_+    | 72.2484408 | 25.9279456 | 2.45603884 | 1.29633337  | 4.1842499   | 2.86E-05 | 7.00E-05   | Up   |
| circRNA_7607 Chr6:76576170_76608864_-    | 36.5438932 | 73.0663958 | 0.44083086 | -1.18170288 | -4.16768546 | 3.08E-05 | 7.51E-05   | Down |
| circRNA_6405 Chr4:117036343_117049564_-  | 93.7535708 | 38.8392013 | 2.12761178 | 1.08923493  | 4.15136967  | 3.30E-05 | 8.04E-05   | Up   |
| circRNA_3212 Chr15:55100386_55104181_-   | 51.4386828 | 91.7305981 | 0.49425432 | -1.01667452 | -4.13418607 | 3.56E-05 | 8.63E-05   | Down |
| circRNA_3962 Chr18:1318740_1325294_-     | 61.224651  | 20.183117  | 2.67370162 | 1.41883847  | 4.12725847  | 3.67E-05 | 8.88E-05   | Up   |
| circRNA_6871 Chr5:76711755_76753032_-    | 90.189903  | 36.9512922 | 2.15131075 | 1.10521593  | 4.12001505  | 3.79E-05 | 9.12E-05   | Up   |
| circRNA_4365 Chr19:32497327_32528958_-   | 38.0324237 | 74.433825  | 0.45035867 | -1.15085367 | -4.11865133 | 3.81E-05 | 9.17E-05   | Down |
| circRNA_2748 Chr14:10877146_10878137_+   | 92.8678748 | 38.6587631 | 2.11734882 | 1.08225896  | 4.11021737  | 3.95E-05 | 9.50E-05   | Up   |
| circRNA_5481 Chr20:55272272_55286373_+   | 55.5198447 | 17.2852971 | 2.83104161 | 1.50133296  | 4.09975112  | 4.14E-05 | 9.91E-05   | Up   |
| circRNA_3780 Chr17:58006111_58023915_+   | 38.5496856 | 74.6782672 | 0.4549896  | -1.13609454 | -4.0829322  | 4.45E-05 | 0.00010614 | Down |
| circRNA_2013 Chr11:79309778_79399831_-   | 54.9411943 | 17.2852971 | 2.80153535 | 1.48621769  | 4.04785859  | 5.17E-05 | 0.00012209 | Up   |
| circRNA_3357 Chr16:7126591_7138308_+     | 57.4683084 | 18.6560843 | 2.71508091 | 1.44099519  | 4.04551978  | 5.22E-05 | 0.00012312 | Up   |
| circRNA_1951 Chr11:68894558_68900825_-   | 89.5371024 | 37.3202866 | 2.11462286 | 1.08040039  | 4.03019933  | 5.57E-05 | 0.0001308  | Up   |
| circRNA_1777 Chr10:110651174_110653361_+ | 56.9469867 | 18.4756461 | 2.71672683 | 1.44186951  | 4.02896096  | 5.60E-05 | 0.00013139 | Up   |

|                                          |            |            |            |             |             |            |            |      |
|------------------------------------------|------------|------------|------------|-------------|-------------|------------|------------|------|
| circRNA_7107 Chr5:144539229_144547479_-  | 91.0952101 | 38.6762398 | 2.0759943  | 1.05380248  | 3.98335745  | 6.79E-05   | 0.00015748 | Up   |
| circRNA_4925 Chr2:155894648_155956589_+  | 38.3545076 | 73.0893478 | 0.4625271  | -1.1123902  | -3.97126217 | 7.15E-05   | 0.00016441 | Down |
| circRNA_6941 Chr5:106553499_106557722_+  | 25.6620128 | 56.1326164 | 0.40294919 | -1.31133015 | -3.96359438 | 7.38E-05   | 0.00016965 | Down |
| circRNA_3250 Chr15:61634455_61651842_-   | 93.172856  | 40.2032725 | 2.04269187 | 1.0304716   | 3.9552982   | 7.64E-05   | 0.00017524 | Up   |
| circRNA_5727 Chr3:63896574_63899788_-    | 56.4297248 | 18.6560843 | 2.66601319 | 1.41468392  | 3.95358456  | 7.70E-05   | 0.00017637 | Up   |
| circRNA_3665 Chr17:10096739_10124159_+   | 86.2024627 | 35.9413814 | 2.11397461 | 1.07995805  | 3.95311857  | 7.71E-05   | 0.00017657 | Up   |
| circRNA_4240 Chr18:77466020_77489468_-   | 93.329838  | 40.366234  | 2.0378731  | 1.02706422  | 3.94786982  | 7.88E-05   | 0.00018035 | Up   |
| circRNA_6026 Chr3:155308522_155317713_+  | 53.7092304 | 17.2852971 | 2.73871563 | 1.45349947  | 3.93636552  | 8.27E-05   | 0.00018892 | Up   |
| circRNA_0406 Chr1:150830996_150866642_+  | 83.6118956 | 34.5705942 | 2.13174908 | 1.09203763  | 3.92857714  | 8.54E-05   | 0.00019469 | Up   |
| circRNA_6999 Chr5:124588622_124594190_-  | 55.7150227 | 18.4756461 | 2.65795446 | 1.41031638  | 3.91930418  | 8.88E-05   | 0.00020156 | Up   |
| circRNA_5735 Chr3:67719259_67755221_-    | 55.6576941 | 18.4756461 | 2.65521952 | 1.40883114  | 3.91416909  | 9.07E-05   | 0.00020574 | Up   |
| circRNA_1915 Chr11:57955724_57965693_-   | 55.5198447 | 18.4756461 | 2.64864325 | 1.40525354  | 3.90180964  | 9.55E-05   | 0.00021571 | Up   |
| circRNA_4088 Chr18:29409770_29412096_+   | 90.1525714 | 38.8392013 | 2.04589192 | 1.03272993  | 3.89765994  | 9.71E-05   | 0.00021911 | Up   |
| circRNA_6184 Chr4:28474639_28495139_+    | 55.7150227 | 18.6560843 | 2.63224721 | 1.39629499  | 3.88977827  | 0.00010034 | 0.00022532 | Up   |
| circRNA_5765 Chr3:80670138_80677335_+    | 82.9888905 | 34.5705942 | 2.11586509 | 1.08124764  | 3.88249391  | 0.00010339 | 0.00023183 | Up   |
| circRNA_3935 Chr17:84900262_84922765_+   | 85.0622301 | 35.9413814 | 2.08601226 | 1.06074764  | 3.8698954   | 0.00010888 | 0.00024359 | Up   |
| circRNA_7596 Chr6:75959532_75965681_-    | 92.1658999 | 40.366234  | 2.01245831 | 1.0089589   | 3.86612649  | 0.00011058 | 0.00024701 | Up   |
| circRNA_8530 Chr8:64141721_64145423_-    | 91.610442  | 40.040311  | 2.01661222 | 1.01193369  | 3.86383018  | 0.00011162 | 0.00024859 | Up   |
| circRNA_7772 Chr6:124625936_124629605_-  | 71.727119  | 27.9841265 | 2.2591574  | 1.17578479  | 3.86125698  | 0.00011281 | 0.00025104 | Up   |
| circRNA_5568 Chr3:13510410_13602354_+    | 82.6990523 | 34.5705942 | 2.10847544 | 1.07620022  | 3.86099119  | 0.00011293 | 0.00025112 | Up   |
| circRNA_2870 Chr14:45851180_45859905_-   | 28.6707013 | 58.8593568 | 0.42933635 | -1.21981976 | -3.83583952 | 0.00012514 | 0.00027661 | Down |
| circRNA_5563 Chr3:13270114_13288615_-    | 84.190546  | 35.7609432 | 2.07505312 | 1.05314827  | 3.82746981  | 0.00012947 | 0.00028575 | Up   |
| circRNA_8180 Chr7:114466514_114468769_-  | 74.9898655 | 30.2746755 | 2.18322219 | 1.12645896  | 3.81494753  | 0.00013621 | 0.0002993  | Up   |
| circRNA_4404 Chr19:34750936_34752697_-   | 36.6012219 | 68.9509153 | 0.46787561 | -1.09580307 | -3.81061115 | 0.00013862 | 0.00030325 | Down |
| circRNA_7712 Chr6:105694451_105703335_+  | 54.4812611 | 18.4756461 | 2.59909632 | 1.3780101   | 3.80814482  | 0.00014001 | 0.00030584 | Up   |
| circRNA_0035 Chr1:6834244_6853903_-      | 25.6620128 | 54.4251455 | 0.41559085 | -1.26676421 | -3.79943393 | 0.00014503 | 0.00031609 | Down |
| circRNA_1135 Chr10:3172084_3207076_+     | 81.6991194 | 34.5705942 | 2.08298139 | 1.05864995  | 3.78649387  | 0.00015279 | 0.00033203 | Up   |
| circRNA_2999 Chr14:108078799_108093840_+ | 29.1538271 | 58.6789186 | 0.4379135  | -1.19128218 | -3.75889704 | 0.00017066 | 0.00036737 | Down |
| circRNA_1537 Chr10:72329605_72332113_-   | 36.5438932 | 68.187399  | 0.47237352 | -1.08199999 | -3.75068111 | 0.00017635 | 0.00037852 | Down |
| circRNA_0534 Chr1:177123077_177130995_+  | 66.469751  | 25.9279456 | 2.25959603 | 1.17606487  | 3.71775457  | 0.000201   | 0.00042894 | Up   |
| circRNA_8720 Chr8:94283953_94317785_-    | 37.315924  | 68.7704771 | 0.47826326 | -1.06412312 | -3.71594471 | 0.00020245 | 0.0004314  | Down |
| circRNA_3886 Chr17:79625911_79635212_-   | 72.8230313 | 30.0302332 | 2.13739557 | 1.09585394  | 3.67673245  | 0.00023624 | 0.00049839 | Up   |



|                                        |            |            |            |             |             |            |            |      |
|----------------------------------------|------------|------------|------------|-------------|-------------|------------|------------|------|
| circRNA_3119 Chr15:27768657_27769399_- | 55.7150227 | 20.0201555 | 2.45289933 | 1.29448802  | 3.67035171  | 0.00024222 | 0.00051027 | Up   |
| circRNA_3327 Chr16:2138232_2142317_-   | 53.1919686 | 18.6560843 | 2.51304592 | 1.32943704  | 3.66086509  | 0.00025137 | 0.00052767 | Up   |
| circRNA_1365 Chr10:48670421_48684279_- | 81.6564088 | 35.9413814 | 2.00249006 | 1.00179508  | 3.61767203  | 0.00029726 | 0.00061963 | Up   |
| circRNA_3598 Chr17:1395222_1416266_+   | 29.1538271 | 57.151886  | 0.44961404 | -1.153241   | -3.61495473 | 0.0003004  | 0.00062529 | Down |
| circRNA_3211 Chr15:55046518_55060167_+ | 28.6707013 | 56.1244984 | 0.45025724 | -1.15117863 | -3.577186   | 0.00034731 | 0.00071789 | Down |
| circRNA_2405 Chr13:35579757_35608096_- | 54.4239325 | 20.0201555 | 2.39605803 | 1.26066285  | 3.55355401  | 0.00038006 | 0.00077987 | Up   |
| circRNA_4031 Chr18:16472884_16475633_- | 54.4239325 | 20.0201555 | 2.39605803 | 1.26066285  | 3.55355401  | 0.00038006 | 0.00077987 | Up   |
| circRNA_5527 Chr3:8585788_8589420_+    | 53.7092304 | 20.0201555 | 2.36459268 | 1.24159169  | 3.48824894  | 0.0004862  | 0.00097767 | Up   |
| circRNA_5723 Chr3:62666948_62696889_+  | 65.9504592 | 27.7134692 | 2.09749912 | 1.06867021  | 3.42825042  | 0.00060748 | 0.00119719 | Up   |

**Supplementary table 5:** The comparison between high-dose EWH treated and the control female SHR for identified DE-miRNA

| miRNA_id         | BaseMean_DESeq2_unpaired | BaseMean_control_C | BaseMean_case_H | FoldChange | log2FoldChange | p-value    | q-value    | Regulation |
|------------------|--------------------------|--------------------|-----------------|------------|----------------|------------|------------|------------|
| rno-miR-1-3p     | 15049.4346               | 9544.834           | 20554.0352      | 2.15340187 | 1.10661758     | 0.00333411 | 0.01972007 | Up         |
| rno-miR-1188-5p  | 4.42137214               | 0                  | 8.84274429      | 48.211413  | 5.59130281     | 0.00064159 | 0.00565768 | Up         |
| rno-miR-1224     | 2.16512732               | 0.48508356         | 3.84517108      | 7.82351264 | 2.9678165      | 0.01089526 | 0.04892781 | Up         |
| rno-miR-124-3p   | 21.5933268               | 4.49748598         | 38.6891676      | 8.62100036 | 3.10785529     | 0.00029698 | 0.0035131  | Up         |
| rno-miR-127-3p   | 2960.11862               | 1250.40751         | 4669.82972      | 3.73476591 | 1.90101782     | 0.00063145 | 0.00565768 | Up         |
| rno-miR-127-5p   | 12.8910583               | 6.82609788         | 18.9560186      | 2.80397278 | 1.48747234     | 0.00903914 | 0.04215367 | Up         |
| rno-miR-129-5p   | 793.693993               | 233.413385         | 1353.9746       | 5.80079963 | 2.53625179     | 0.00368693 | 0.02128765 | Up         |
| rno-miR-134-5p   | 223.557253               | 87.7524975         | 359.362009      | 4.09682188 | 2.03450517     | 5.66E-05   | 0.00130735 | Up         |
| rno-miR-135b-5p  | 64.0995835               | 126.624663         | 1.57450357      | 0.01266716 | -6.30276295    | 1.77E-06   | 0.00021417 | Down       |
| rno-miR-136-3p   | 79.8709355               | 45.2513816         | 114.490489      | 2.53305823 | 1.34088024     | 0.00237157 | 0.01513438 | Up         |
| rno-miR-137-3p   | 9.07962423               | 1.3198208          | 16.8394277      | 12.7504183 | 3.67247267     | 0.00854321 | 0.04134563 | Up         |
| rno-miR-137-5p   | 5.57040444               | 1.36181438         | 9.7789945       | 7.31686558 | 2.87122576     | 0.00388409 | 0.02216218 | Up         |
| rno-miR-138-2-3p | 7.6375301                | 2.30413064         | 12.9709296      | 5.64980733 | 2.49820167     | 0.00328476 | 0.01966801 | Up         |
| rno-miR-138-5p   | 30.5232735               | 8.27218107         | 52.7743659      | 6.38650391 | 2.67502639     | 0.00106083 | 0.00791543 | Up         |
| rno-miR-141-3p   | 38.3414748               | 71.8882949         | 4.79465475      | 0.06661696 | -3.90796673    | 8.64E-05   | 0.00153434 | Down       |
| rno-miR-17-5p    | 226.479324               | 353.056042         | 99.9026064      | 0.28296719 | -1.82129331    | 8.86E-05   | 0.00153434 | Down       |
| rno-miR-18a-5p   | 15.3875018               | 25.6008227         | 5.17418097      | 0.20275805 | -2.30216891    | 0.00427302 | 0.02382087 | Down       |
| rno-miR-200a-3p  | 418.201665               | 706.596376         | 129.806955      | 0.18372431 | -2.44438552    | 0.00032601 | 0.00362174 | Down       |
| rno-miR-200b-3p  | 1573.73673               | 2980.29468         | 167.17877       | 0.05609923 | -4.15587531    | 8.37E-06   | 0.00036893 | Down       |
| rno-miR-200b-5p  | 18.8854435               | 34.9510852         | 2.81980175      | 0.07989683 | -3.64571799    | 0.00010524 | 0.00159034 | Down       |
| rno-miR-200c-3p  | 101.154966               | 170.963771         | 31.3461608      | 0.18358713 | -2.44546314    | 0.00101143 | 0.00771381 | Down       |
| rno-miR-204-3p   | 89.5454171               | 45.1584983         | 133.932336      | 2.96919553 | 1.5700721      | 0.00041621 | 0.00420542 | Up         |
| rno-miR-204-5p   | 4598.70814               | 2373.01764         | 6824.39865      | 2.87595119 | 1.52403919     | 3.53E-05   | 0.0009513  | Up         |
| rno-miR-20a-5p   | 452.861054               | 706.294192         | 199.427916      | 0.28238301 | -1.8242748     | 2.71E-05   | 0.00077329 | Down       |
| rno-miR-21-3p    | 14.843771                | 23.2383156         | 6.44922642      | 0.27752453 | -1.8493128     | 7.76E-06   | 0.00036893 | Down       |
| rno-miR-23a-5p   | 11.0444156               | 14.9595426         | 7.12928851      | 0.47486971 | -1.07439636    | 0.00842763 | 0.04134563 | Down       |
| rno-miR-298-5p   | 27.809833                | 11.1196999         | 44.4999662      | 4.01044999 | 2.00376412     | 0.00015311 | 0.00200695 | Up         |
| rno-miR-300-3p   | 94.6339576               | 40.5457758         | 148.722139      | 3.67194837 | 1.87654577     | 0.00012087 | 0.00171624 | Up         |

|                   |            |            |            |            |             |            |            |      |
|-------------------|------------|------------|------------|------------|-------------|------------|------------|------|
| rno-miR-3065-3p   | 35.404201  | 21.5110758 | 49.2973263 | 2.29700134 | 1.1997517   | 0.01049737 | 0.04803041 | Up   |
| rno-miR-3099      | 12.414956  | 3.40727144 | 21.4226406 | 6.36532803 | 2.67023486  | 0.0005839  | 0.00544603 | Up   |
| rno-miR-323-3p    | 365.917872 | 90.9728467 | 640.862898 | 7.0461494  | 2.81683507  | 3.00E-06   | 0.00027081 | Up   |
| rno-miR-323-5p    | 13.3445112 | 0.6859265  | 26.0030959 | 38.6525231 | 5.27249068  | 3.94E-06   | 0.00027327 | Up   |
| rno-miR-325-5p    | 135.284171 | 53.3079788 | 217.260364 | 4.07929069 | 2.02831832  | 8.11E-06   | 0.00036893 | Up   |
| rno-miR-329-3p    | 17.1720652 | 6.74531561 | 27.5988148 | 4.09996193 | 2.03561051  | 0.00173908 | 0.01171464 | Up   |
| rno-miR-338-3p    | 1393.29485 | 667.449831 | 2119.13987 | 3.17531451 | 1.6668995   | 1.00E-04   | 0.00159034 | Up   |
| rno-miR-338-5p    | 1817.90146 | 841.808686 | 2793.99424 | 3.31926923 | 1.73086565  | 1.74E-05   | 0.00056146 | Up   |
| rno-miR-341       | 16.0724728 | 4.87206277 | 27.2728829 | 5.63568475 | 2.49459091  | 0.00101791 | 0.00771381 | Up   |
| rno-miR-344b-1-3p | 4.01924401 | 0.49046691 | 7.54802111 | 15.2455595 | 3.93031719  | 0.00147694 | 0.01038138 | Up   |
| rno-miR-3543      | 265.957707 | 127.466061 | 404.449352 | 3.17476151 | 1.66664822  | 0.00071699 | 0.00610073 | Up   |
| rno-miR-3557-3p   | 369.099765 | 592.078363 | 146.121167 | 0.24670574 | -2.01913683 | 0.0107316  | 0.04864324 | Down |
| rno-miR-3576      | 5.78184123 | 0.6611339  | 10.9025486 | 16.5280755 | 4.04684684  | 0.00033031 | 0.00362174 | Up   |
| rno-miR-3578      | 37.9457009 | 14.7467513 | 61.1446504 | 4.15456126 | 2.05469613  | 0.00068094 | 0.00589741 | Up   |
| rno-miR-363-3p    | 87.047403  | 49.8941899 | 124.200616 | 2.49295889 | 1.31785909  | 0.00949443 | 0.04385522 | Up   |
| rno-miR-369-3p    | 46.1152209 | 17.2589199 | 74.9715218 | 4.35143057 | 2.12148978  | 0.00010821 | 0.00159034 | Up   |
| rno-miR-369-5p    | 108.751442 | 43.7566638 | 173.746219 | 3.97536697 | 1.99108804  | 0.00013897 | 0.00187229 | Up   |
| rno-miR-370-3p    | 193.324168 | 66.710945  | 319.93739  | 4.79717568 | 2.26218527  | 0.00010591 | 0.00159034 | Up   |
| rno-miR-370-5p    | 2.27899647 | 0.32498298 | 4.23300996 | 11.9405505 | 3.57779745  | 0.00101267 | 0.00771381 | Up   |
| rno-miR-375-3p    | 580.95202  | 125.651375 | 1036.25266 | 8.24804577 | 3.04405234  | 0.00260744 | 0.01621291 | Up   |
| rno-miR-376b-3p   | 9.03638193 | 3.31032985 | 14.762434  | 4.47702271 | 2.16253964  | 0.0048667  | 0.02569639 | Up   |
| rno-miR-376b-5p   | 43.7214465 | 22.7413012 | 64.7015918 | 2.85025365 | 1.51109032  | 0.00492735 | 0.02569639 | Up   |
| rno-miR-379-3p    | 178.477269 | 100.371795 | 256.582744 | 2.5587705  | 1.35545075  | 0.00054969 | 0.0052911  | Up   |
| rno-miR-379-5p    | 1032.43471 | 548.454612 | 1516.41481 | 2.76523849 | 1.46740391  | 0.00119322 | 0.00863748 | Up   |
| rno-miR-380-3p    | 30.2592652 | 6.13434327 | 54.3841872 | 8.87509195 | 3.14976207  | 1.47E-05   | 0.0005494  | Up   |
| rno-miR-380-5p    | 24.4054757 | 6.25654973 | 42.5544017 | 6.80396449 | 2.76637561  | 0.00049657 | 0.00491498 | Up   |
| rno-miR-382-5p    | 361.971704 | 123.486888 | 600.456519 | 4.86374274 | 2.28206692  | 2.38E-05   | 0.00072289 | Up   |
| rno-miR-384-3p    | 55.4918481 | 21.6753227 | 89.3083735 | 4.12768632 | 2.04533334  | 9.78E-05   | 0.00159034 | Up   |
| rno-miR-384-5p    | 97.7838519 | 32.369276  | 163.198428 | 5.04687365 | 2.33538997  | 4.36E-05   | 0.00105727 | Up   |
| rno-miR-409a-3p   | 19.2864416 | 4.92189928 | 33.650984  | 6.89376336 | 2.78529178  | 7.78E-05   | 0.00145948 | Up   |
| rno-miR-409a-5p   | 34.4598918 | 11.2948572 | 57.6249265 | 5.10981523 | 2.35327112  | 0.00250835 | 0.01579932 | Up   |
| rno-miR-409b      | 1629.48944 | 394.53945  | 2864.43943 | 7.26043471 | 2.86005593  | 2.38E-07   | 0.0001154  | Up   |

|                 |            |            |            |            |             |            |            |      |
|-----------------|------------|------------|------------|------------|-------------|------------|------------|------|
| rno-miR-410-3p  | 53.4900503 | 20.4914701 | 86.4886305 | 4.22448962 | 2.07877705  | 0.00060405 | 0.00552758 | Up   |
| rno-miR-411-5p  | 392.596183 | 230.618275 | 554.57409  | 2.40577288 | 1.26650045  | 0.0018345  | 0.01218811 | Up   |
| rno-miR-412-5p  | 4.83806648 | 0.6859265  | 8.99020647 | 13.4662039 | 3.75127131  | 0.00084783 | 0.00695022 | Up   |
| rno-miR-431     | 41.0908816 | 14.7783761 | 67.4033871 | 4.57007716 | 2.19221852  | 0.00086498 | 0.00695022 | Up   |
| rno-miR-433-3p  | 242.604413 | 63.9500721 | 421.258754 | 6.58962152 | 2.72019561  | 1.10E-05   | 0.00044642 | Up   |
| rno-miR-433-5p  | 2.3408158  | 0.49652798 | 4.18510361 | 8.49784685 | 3.08709734  | 0.00352955 | 0.02062448 | Up   |
| rno-miR-434-3p  | 576.72647  | 271.014677 | 882.438263 | 3.25680505 | 1.70345736  | 0.00033604 | 0.00362174 | Up   |
| rno-miR-434-5p  | 448.973027 | 166.01824  | 731.927814 | 4.40960097 | 2.14064811  | 7.25E-05   | 0.00145948 | Up   |
| rno-miR-484     | 126.07511  | 170.57639  | 81.5738302 | 0.47825827 | -1.06413819 | 0.00030751 | 0.00355103 | Down |
| rno-miR-485-3p  | 67.1070864 | 25.7557269 | 108.458446 | 4.21739963 | 2.07635373  | 3.85E-05   | 0.00098347 | Up   |
| rno-miR-485-5p  | 43.8411458 | 12.9419764 | 74.7403153 | 5.78276387 | 2.53175919  | 0.00016908 | 0.00215801 | Up   |
| rno-miR-487b-3p | 64.2813058 | 24.8724258 | 103.690186 | 4.17136259 | 2.06051872  | 0.00077089 | 0.00644627 | Up   |
| rno-miR-490-3p  | 18.9977828 | 7.11982522 | 30.8757403 | 4.34766626 | 2.1202412   | 0.00857082 | 0.04134563 | Up   |
| rno-miR-490-5p  | 18.8919245 | 4.17116875 | 33.6126803 | 8.07474604 | 3.01341689  | 0.00266216 | 0.0162833  | Up   |
| rno-miR-493-5p  | 73.6207562 | 21.8028034 | 125.438709 | 5.75956101 | 2.52595886  | 0.00012385 | 0.00171624 | Up   |
| rno-miR-495     | 160.906855 | 50.5456294 | 271.268081 | 5.37015569 | 2.42496392  | 8.75E-07   | 0.00014996 | Up   |
| rno-miR-496-3p  | 7.55885744 | 2.99603518 | 12.1216797 | 4.08575207 | 2.03060166  | 0.00870164 | 0.04137546 | Up   |
| rno-miR-539-5p  | 26.107594  | 11.2616111 | 40.953577  | 3.64702145 | 1.86671869  | 0.00157745 | 0.01092947 | Up   |
| rno-miR-540-3p  | 25.0643417 | 6.66842376 | 43.4602596 | 6.53682794 | 2.70859072  | 0.00039151 | 0.00412784 | Up   |
| rno-miR-541-5p  | 408.442118 | 203.48021  | 613.404026 | 3.01542327 | 1.59236053  | 0.00162959 | 0.0111317  | Up   |
| rno-miR-543-3p  | 48.5842633 | 15.2766188 | 81.8919079 | 5.3676785  | 2.42429826  | 7.82E-05   | 0.00145948 | Up   |
| rno-miR-592     | 6.1418348  | 11.6728142 | 0.61085542 | 0.05448136 | -4.19809338 | 0.00861012 | 0.04134563 | Down |
| rno-miR-6331    | 52.5801347 | 11.3655655 | 93.7947039 | 8.26996856 | 3.04788185  | 9.28E-07   | 0.00014996 | Up   |
| rno-miR-666-5p  | 1.35879632 | 0          | 2.71759264 | 14.9059495 | 3.89781637  | 0.00452494 | 0.02465839 | Up   |
| rno-miR-667-3p  | 2.47625754 | 0          | 4.95251508 | 27.1795942 | 4.76445201  | 0.00040038 | 0.00413162 | Up   |
| rno-miR-667-5p  | 1.74910588 | 0.16573523 | 3.33247653 | 13.1975751 | 3.72220097  | 0.0014733  | 0.01038138 | Up   |
| rno-miR-758-3p  | 11.1456236 | 1.9780137  | 20.3132336 | 10.2695214 | 3.36029704  | 6.68E-05   | 0.00145948 | Up   |
| rno-miR-7b      | 362.420203 | 36.6329079 | 688.207498 | 18.7864886 | 4.23162353  | 6.56E-06   | 0.00036893 | Up   |
| rno-miR-9a-3p   | 181.416514 | 108.671985 | 254.161044 | 2.33992373 | 1.2264615   | 0.00473608 | 0.02552224 | Up   |
| rno-miR-9a-5p   | 3711.34857 | 1557.23007 | 5865.46707 | 3.76672078 | 1.91330909  | 3.35E-06   | 0.00027081 | Up   |
